# Supplementary material for: Comparative interactome analysis of α-arrestin families in human and Drosophila
Source: eLife journal article supplement (doi:10.7554/elife.88328), 2023-07-26
Supplement: supp12 [file elife-88328-supp12-v1.zip]

# Health Monitoring Report

| Facility                                    | Barrier             | Species        |             |                     |
|---------------------------------------------|---------------------|----------------|-------------|---------------------|
| KOATECH                                     | A103 Hsd:ICR(CD-1®) | Mouse          |             |                     |
| Viruses                                     | Latest Test Date    | Latest Results | Test Method | Historical Results* |
| Ectromelia virus                            | 18.07.23            | 0/3            | Bead        | 0/21                |
| Hantavirus                                  | 17.01.23            | 0/3            | Bead        | 0/6                 |
| Lactate dehydrogenase elevating virus       | 17.01.23            | 0/3            | ELISA       | 0/6                 |
| Lymphocytic choriomeningitis virus          | 18.07.23            | 0/3            | Bead        | 0/21                |
| Minute virus of mice                        | 18.07.23            | 0/3            | Bead        | 0/21                |
| Mouse adenovirus type 1 (MAd FL)            | 18.07.23            | 0/3            | Bead        | 0/21                |
| Mouse adenovirus type 2 (MAd K87)           | 18.07.23            | 0/3            | Bead        | 0/21                |
| Mouse cytomegalovirus                       | 17.01.23            | 0/3            | Bead        | 0/6                 |
| Mouse hepatitis virus                       | 18.07.23            | 0/3            | Bead        | 0/21                |
| Mouse K-virus                               | 17.01.23            | 0/3            | ELISA       | 0/6                 |
| Mouse Norovirus                             | 18.07.23            | 0/3            | Bead        | 0/21                |
| Mouse parvovirus                            | 18.07.23            | 0/3            | Bead        | 0/21                |
| Mouse polyoma virus                         | 17.01.23            | 0/3            | ELISA       | 0/6                 |
| Mouse rotavirus (EDIM)                      | 18.07.23            | 0/3            | Bead        | 0/21                |
| Mouse thymic virus                          | 17.01.23            | 0/3            | IFA         | 0/6                 |
| Pneumonia virus of mice                     | 18.07.23            | 0/3            | Bead        | 0/21                |
| Reovirus type 3 (Reo 3)                     | 18.07.23            | 0/3            | Bead        | 0/21                |
| Sendai Virus                                | 18.07.23            | 0/3            | Bead        | 0/21                |
| Theiler's murine encephalomyelitis virus    | 18.07.23            | 0/3            | Bead        | 0/21                |
| Bacteria, Mycoplasma and Fungi              |                     |                |             |                     |
| <i>Bordetella bronchiseptica</i>            | 17.01.23            | 0/3            | RT-PCR      | 0/6                 |
| CAR Bacillus                                | 17.01.23            | 0/3            | ELISA       | 0/6                 |
| <i>Citrobacter rodentium</i>                | 18.07.23            | 0/3            | RT-PCR      | 0/21                |
| <i>Clostridium piliforme</i>                | 18.07.23            | 0/3            | Bead        | 0/21                |
| <i>Corynebacterium kutscheri</i>            | 18.07.23            | 0/3            | RT-PCR      | 0/21                |
| Dermatophytes                               | 17.01.23            | 0/3            | Culture     | 0/6                 |
| <i>Helicobacter bilis</i>                   | 18.07.23            | 0/3            | RT-PCR      | 0/21                |
| <i>Helicobacter hepaticus</i>               | 18.07.23            | 0/3            | RT-PCR      | 0/21                |
| <i>Klebsiella oxytoca</i>                   | 18.07.23            | 0/3            | RT-PCR      | 0/21                |
| <i>Klebsiella pneumoniae</i>                | 18.07.23            | 0/3            | RT-PCR      | 0/21                |
| <i>Mycoplasma pulmonis</i>                  | 18.07.23            | 0/3            | Bead        | 0/21                |
| <i>Pasteurella multocida</i>                | 18.07.23            | 0/3            | RT-PCR      | 0/21                |
| <i>Pasteurella pneumotropica</i>            | 18.07.23            | 0/3            | RT-PCR      | 0/21                |
| <i>Pneumocystis murina</i>                  | 17.01.23            | 0/3            | RT-PCR      | 0/6                 |
| <i>Pseudomonas aeruginosa</i>               | 18.07.23            | 0/3            | RT-PCR      | 0/21                |
| <i>Salmonella</i> spp                       | 18.07.23            | 0/3            | RT-PCR      | 0/21                |
| <i>Streptobacillus moniliformis</i>         | 18.07.23            | 0/3            | RT-PCR      | 0/21                |
| <i>Streptococci Beta-haemolytic Group A</i> | 18.07.23            | 0/3            | RT-PCR      | 0/21                |
| <i>Streptococci Beta-haemolytic Group B</i> | 18.07.23            | 0/3            | RT-PCR      | 0/21                |
| <i>Streptococci Beta-haemolytic Group C</i> | 18.07.23            | 0/3            | RT-PCR      | 0/21                |
| <i>Streptococci Beta-haemolytic Group G</i> | 18.07.23            | 0/3            | RT-PCR      | 0/21                |
| <i>Streptococcus pneumoniae</i>             | 18.07.23            | 0/3            | RT-PCR      | 0/21                |
| Parasites                                   |                     |                |             |                     |
| <i>Encephalitozoon cuniculi</i>             | 18.07.23            | 0/3            | ELISA       | 0/21                |

**Report Reference: 23-7337, Report Printed: July 26, 2023, Barrier Populated: October 26, 2018**

Data are expressed as number positive/number tested. \*Cumulative data up to 18 months.

All testing is performed by Envigo using standard operating procedures.

Results are controlled through a secure LIMS and released on the approval of the Laboratory Services Manager.

Envigo + Phone:+44 (0)1530 225157 + Fax:+44 (0)1530 222807 + [rmstechnicalservices.eu@envigo.com](mailto:rmstechnicalservices.eu@envigo.com) + [envigo.com](http://envigo.com)

# Health Monitoring Report

| Facility               | Barrier             |     | Species |      |
|------------------------|---------------------|-----|---------|------|
| KOATECH                | A103 Hsd:ICR(CD-1®) |     | Mouse   |      |
| Ectoparasites          |                     |     |         |      |
| Myobia/Radfordia       | 18.07.23            | 0/3 | RT-PCR  | 0/21 |
| Myocoptes musculus     | 18.07.23            | 0/3 | RT-PCR  | 0/21 |
| Endoparasites          |                     |     |         |      |
| Aspiculuris tetraptera | 18.07.23            | 0/3 | RT-PCR  | 0/21 |
| Chilomastix spp        | 18.07.23            | 0/3 | RT-PCR  | 0/21 |
| Entamoeba muris        | 18.07.23            | 0/3 | RT-PCR  | 0/21 |
| Giardia muris          | 18.07.23            | 0/3 | RT-PCR  | 0/21 |
| Spironucleus muris     | 18.07.23            | 0/3 | RT-PCR  | 0/21 |
| Syphacia muris         | 18.07.23            | 0/3 | RT-PCR  | 0/21 |
| Syphacia obvelata      | 18.07.23            | 0/3 | RT-PCR  | 0/21 |
| Tritrichomonas muris   | 18.07.23            | 0/3 | RT-PCR  | 0/21 |

**Report Reference: 23-7337, Report Printed: July 26, 2023, Barrier Populated: October 26, 2018**

Data are expressed as number positive/number tested. \*Cumulative data up to 18 months.

All testing is performed by Envigo using standard operating procedures.

Results are controlled through a secure LIMS and released on the approval of the Laboratory Services Manager.

Envigo + Phone:+44 (0)1530 225157 + Fax:+44 (0)1530 222807 + [rmstechnicalservices.eu@envigo.com](mailto:rmstechnicalservices.eu@envigo.com) + [envigo.com](http://envigo.com)

# Health Monitoring Report

| Facility                                    | Barrier                      | Species        |             |                     |
|---------------------------------------------|------------------------------|----------------|-------------|---------------------|
| KOATECH                                     | A205 C57BL/6NHsd/BALB/cAnHsd | Mouse          |             |                     |
| Viruses                                     | Latest Test Date             | Latest Results | Test Method | Historical Results* |
| Ectromelia virus                            | 18.07.23                     | 0/2            | Bead        | 0/14                |
| Hantavirus                                  | 17.01.23                     | 0/2            | Bead        | 0/4                 |
| Lactate dehydrogenase elevating virus       | 17.01.23                     | 0/2            | ELISA       | 0/4                 |
| Lymphocytic choriomeningitis virus          | 18.07.23                     | 0/2            | Bead        | 0/14                |
| Minute virus of mice                        | 18.07.23                     | 0/2            | Bead        | 0/14                |
| Mouse adenovirus type 1 (MAd FL)            | 18.07.23                     | 0/2            | Bead        | 0/14                |
| Mouse adenovirus type 2 (MAd K87)           | 18.07.23                     | 0/2            | Bead        | 0/14                |
| Mouse cytomegalovirus                       | 17.01.23                     | 0/2            | Bead        | 0/4                 |
| Mouse hepatitis virus                       | 18.07.23                     | 0/2            | Bead        | 0/14                |
| Mouse K-virus                               | 17.01.23                     | 0/2            | ELISA       | 0/4                 |
| Mouse Norovirus                             | 18.07.23                     | 0/2            | Bead        | 0/14                |
| Mouse parvovirus                            | 18.07.23                     | 0/2            | Bead        | 0/14                |
| Mouse polyoma virus                         | 17.01.23                     | 0/2            | ELISA       | 0/4                 |
| Mouse rotavirus (EDIM)                      | 18.07.23                     | 0/2            | Bead        | 0/14                |
| Mouse thymic virus                          | 17.01.23                     | 0/2            | IFA         | 0/4                 |
| Pneumonia virus of mice                     | 18.07.23                     | 0/2            | Bead        | 0/14                |
| Reovirus type 3 (Reo 3)                     | 18.07.23                     | 0/2            | Bead        | 0/14                |
| Sendai Virus                                | 18.07.23                     | 0/2            | Bead        | 0/14                |
| Theiler's murine encephalomyelitis virus    | 18.07.23                     | 0/2            | Bead        | 0/14                |
| Bacteria, Mycoplasma and Fungi              |                              |                |             |                     |
| <i>Bordetella bronchiseptica</i>            | 17.01.23                     | 0/2            | RT-PCR      | 0/4                 |
| CAR Bacillus                                | 17.01.23                     | 0/2            | ELISA       | 0/4                 |
| <i>Citrobacter rodentium</i>                | 18.07.23                     | 0/2            | RT-PCR      | 0/14                |
| <i>Clostridium piliforme</i>                | 18.07.23                     | 0/2            | Bead        | 0/14                |
| <i>Corynebacterium kutscheri</i>            | 18.07.23                     | 0/2            | RT-PCR      | 0/14                |
| Dermatophytes                               | 17.01.23                     | 0/2            | Culture     | 0/4                 |
| <i>Helicobacter bilis</i>                   | 18.07.23                     | 0/2            | RT-PCR      | 0/14                |
| <i>Helicobacter hepaticus</i>               | 18.07.23                     | 0/2            | RT-PCR      | 0/14                |
| <i>Klebsiella oxytoca</i>                   | 18.07.23                     | 0/2            | RT-PCR      | 0/14                |
| <i>Klebsiella pneumoniae</i>                | 18.07.23                     | 0/2            | RT-PCR      | 0/14                |
| <i>Mycoplasma pulmonis</i>                  | 18.07.23                     | 0/2            | Bead        | 0/14                |
| <i>Pasteurella multocida</i>                | 18.07.23                     | 0/2            | RT-PCR      | 0/14                |
| <i>Pasteurella pneumotropica</i>            | 18.07.23                     | 0/2            | RT-PCR      | 0/14                |
| <i>Pneumocystis murina</i>                  | 17.01.23                     | 0/2            | RT-PCR      | 0/4                 |
| <i>Pseudomonas aeruginosa</i>               | 18.07.23                     | 0/2            | RT-PCR      | 0/14                |
| <i>Salmonella</i> spp                       | 18.07.23                     | 0/2            | RT-PCR      | 0/14                |
| <i>Streptobacillus moniliformis</i>         | 18.07.23                     | 0/2            | RT-PCR      | 0/14                |
| <i>Streptococci Beta-haemolytic Group A</i> | 18.07.23                     | 0/2            | RT-PCR      | 0/14                |
| <i>Streptococci Beta-haemolytic Group B</i> | 18.07.23                     | 0/2            | RT-PCR      | 0/14                |
| <i>Streptococci Beta-haemolytic Group C</i> | 18.07.23                     | 0/2            | RT-PCR      | 0/14                |
| <i>Streptococci Beta-haemolytic Group G</i> | 18.07.23                     | 0/2            | RT-PCR      | 0/14                |
| <i>Streptococcus pneumoniae</i>             | 18.07.23                     | 0/2            | RT-PCR      | 0/14                |
| Parasites                                   |                              |                |             |                     |
| <i>Encephalitozoon cuniculi</i>             | 18.07.23                     | 0/2            | ELISA       | 0/14                |

Report Reference: 23-7341, Report Printed: July 26, 2023, Barrier Populated: October 26, 2018

Data are expressed as number positive/number tested. \*Cumulative data up to 18 months.

All testing is performed by Envigo using standard operating procedures.

Results are controlled through a secure LIMS and released on the approval of the Laboratory Services Manager.

Envigo + Phone:+44 (0)1530 225157 + Fax:+44 (0)1530 222807 + rmstechnicalservices.eu@envigo.com + envigo.com

# Health Monitoring Report

| Facility               | Barrier                      |     | Species |      |
|------------------------|------------------------------|-----|---------|------|
| KOATECH                | A205 C57BL/6NHsd/BALB/cAnHsd |     | Mouse   |      |
| Ectoparasites          |                              |     |         |      |
| Myobia/Radfordia       | 18.07.23                     | 0/2 | RT-PCR  | 0/14 |
| Myocoptes musculus     | 18.07.23                     | 0/2 | RT-PCR  | 0/14 |
| Endoparasites          |                              |     |         |      |
| Aspiculuris tetraptera | 18.07.23                     | 0/2 | RT-PCR  | 0/14 |
| Chilomastix spp        | 18.07.23                     | 0/2 | RT-PCR  | 0/14 |
| Entamoeba muris        | 18.07.23                     | 0/2 | RT-PCR  | 0/14 |
| Giardia muris          | 18.07.23                     | 0/2 | RT-PCR  | 0/14 |
| Spironucleus muris     | 18.07.23                     | 0/2 | RT-PCR  | 0/14 |
| Syphacia muris         | 18.07.23                     | 0/2 | RT-PCR  | 0/14 |
| Syphacia obvelata      | 18.07.23                     | 0/2 | RT-PCR  | 0/14 |
| Tritrichomonas muris   | 18.07.23                     | 0/2 | RT-PCR  | 0/14 |

**Report Reference: 23-7341, Report Printed: July 26, 2023, Barrier Populated: October 26, 2018**

Data are expressed as number positive/number tested. \*Cumulative data up to 18 months.

All testing is performed by Envigo using standard operating procedures.

Results are controlled through a secure LIMS and released on the approval of the Laboratory Services Manager.

Envigo + Phone:+44 (0)1530 225157 + Fax:+44 (0)1530 222807 + [rmstechnicalservices.eu@envigo.com](mailto:rmstechnicalservices.eu@envigo.com) + [envigo.com](http://envigo.com)
