# Supplementary material for: Comparative interactome analysis of α-arrestin families in human and Drosophila
Source: eLife journal article supplement (doi:10.7554/elife.88328), 2023-07-26
Supplement: supp12 [file elife-88328-supp12-v1.zip]

# Genetic Monitoring Report

Test Report Date: April 2023

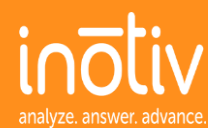

| Location: Koatech          |                       |                              |                |                              |  |
|----------------------------|-----------------------|------------------------------|----------------|------------------------------|--|
| Genetic Monitoring Results |                       |                              | Species: Mouse |                              |  |
| Model                      | Most Recent Test Date | Recent Results Tested/Passed |                | Number of SNP Markers Tested |  |
| BALB/cAnNHsd               | 1-Apr-23              | 5 / 5                        |                | 48                           |  |
| C57BL/6NHsd                | 1-Apr-23              | 5 / 5                        |                | 48                           |  |
| CBA/JCrHsd                 | 1-Apr-23              | 5 / 5                        |                | 48                           |  |
| DBA/2NHsd                  | 1-Apr-23              | 5 / 5                        |                | 48                           |  |
|                            |                       |                              |                |                              |  |

Testing Laboratory: TransnetYX Cordova, TN

Inbred strains have been tested using a custom panel of 48 Single Nucleotide Polymorphism (SNP) markers.

*Sheri Church*

Sheri Church, PhD  
Global Geneticist

inotivco.com

8520 Allison Pointe Boulevard, Suite 400, Indianapolis, IN 46250
