# Supplementary material for: Comparative interactome analysis of α-arrestin families in human and Drosophila
Source: eLife journal article supplement (doi:10.7554/elife.88328), 2023-07-26
Supplement: supp12 [file elife-88328-supp12-v1.zip]

# Cell line STR

## Analysis Result Report

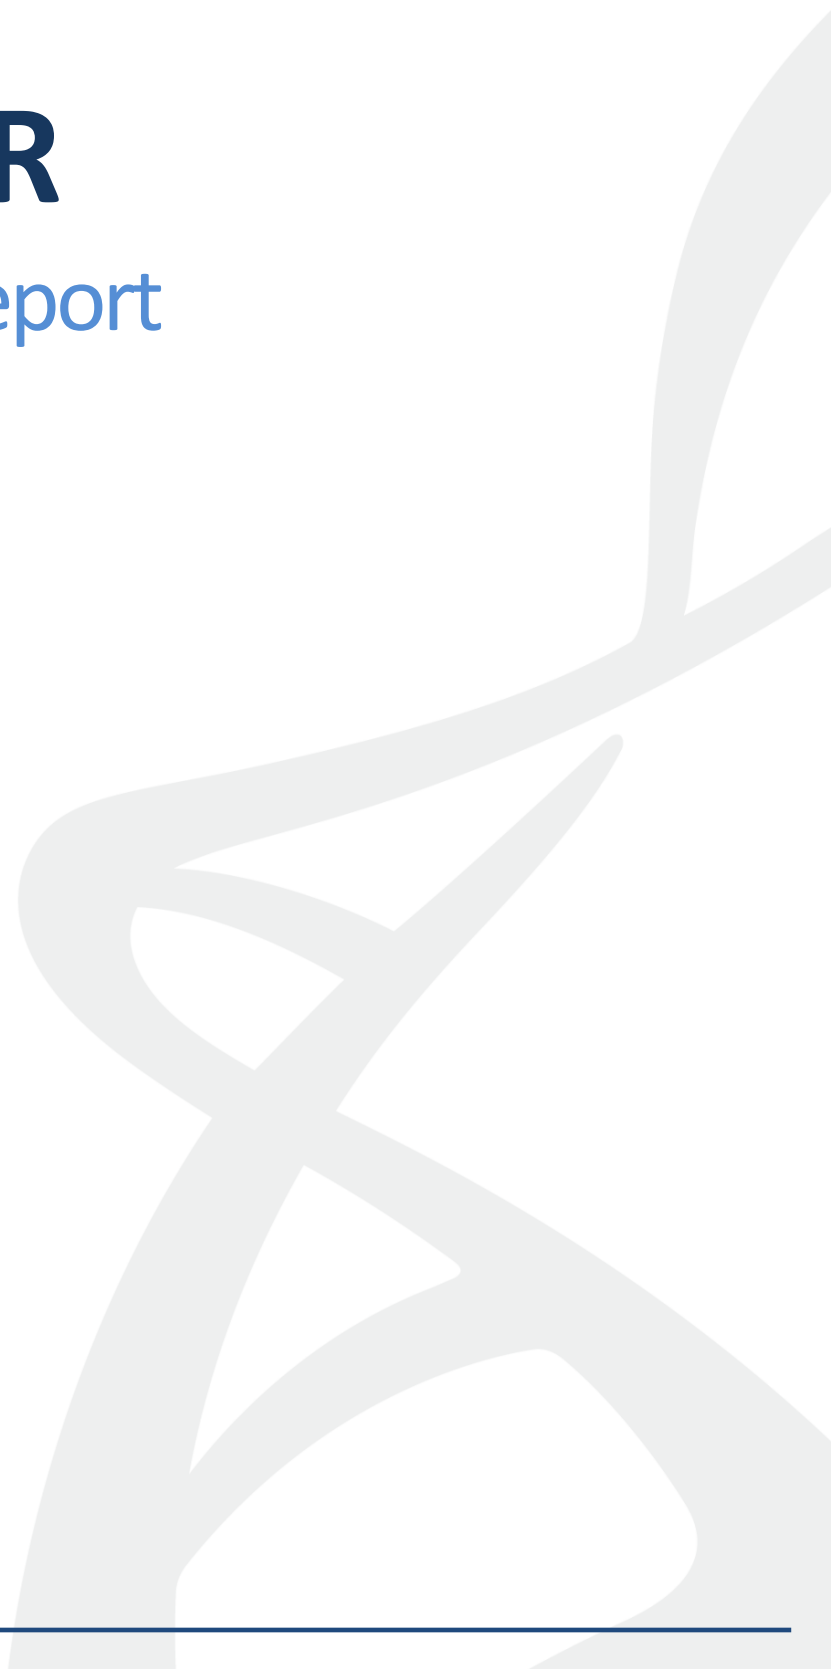

## INFORMATION

|             |              |
|-------------|--------------|
| Order No.   | HC00683860   |
| Date        | 2023. 04. 14 |
| Sample Type | Cell line    |

## METHOD

- The AmpFISTR® Identifiler® PCR Amplification Kit is a short tandem repeat (STR) multiplex assay that amplifies 15 tetranucleotide repeat loci and the Amelogenin gender-determining marker in a single PCR amplification:
  - All thirteen of the required loci for the Combined DNA Index System (CODIS) (Budowle et al., 1998).
  - Two additional loci, D2S1338 and D19S433.
- We use Applied Biosystems® 3730/3730xl DNA Analyzer and analyze data using GeneMapper ID v3.2. For reliability, Positive (DNA9947A) and Negative are used together during the test.
- We do experiment based on the Genotype Identification Kit of ABI which is international standard method, and we also obtained a method using PowerPlex21 of Promega to secure diversity.

## REFERENCE

- Budowle, B. et al. 1998. CODIS and PCR Based Short Tandem Repeat Loci: Law Enforcement Tools. Second European Symposium on Human Identification. 73–88.
- Holt, C., Stauffer, C., Wallin, J., Lazaruk, L., Nguyen, T., Budowle, B., and Walsh, P. 2000. Practical applications of genotypic Surveys for forensic STR testing. Forensic Sci.
- Butler, J.M. 2005. Forensic DNA Typing. Burlington, MA:Elsevier Academic Press.

## PROCESS

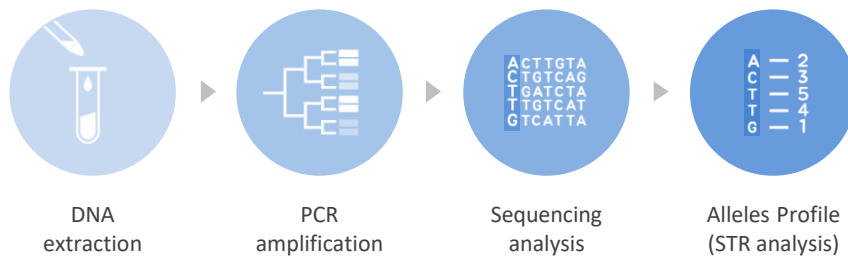

## NOTE

### Cell line authentication?

Cell line authentication Service is genetic analyzing service using Multiplex-PCR Kit which is comprised of STR(Short Tandem Repeat) loci.

### STR Marker Information (AmpFISTR®Identifiler® PCR Amplification KIT)

| STR Locus  | Label | Size Range | Chromosomal Location | Repeat Sequence 5'→3' |
|------------|-------|------------|----------------------|-----------------------|
| D8S1179    | 6-FAM | 123-170    | 8q24.13              | (TCTA)(TCTG)          |
| D21S11     |       | 185-239    | 21q21.1              | (TCTA)(TCTG)          |
| D7S820     |       | 255-291    | 7q21.11              | GATA                  |
| CSF1PO     |       | 305-342    | 5q33.1               | TAGA                  |
| D3S1358    | VIC   | 112-140    | 3p21.31              | (TCTA)(TCTA)          |
| TH01       |       | 163-202    | 11p15.5              | TCAT                  |
| D13S317    |       | 217-245    | 13q31.1              | TATC                  |
| D16S539    |       | 252-292    | 16q24.1              | GATC                  |
| D2S1338    |       | 307-359    | 2q35                 | (TGCC)(TTCC)          |
| Amelogenin | PET   | 107,113    | XP22.22/YP11.2       | NA                    |
| D5S818     |       | 134-172    | 5q23.2               | AGAT                  |
| FGA        |       | 215-355    | 4q31.3               | CTTT                  |
| D19S433    | NED   | 102-135    | 19q12                | AAGG                  |
| vWA        |       | 155-207    | 12q13.31             | (TCTG)(TCTA)          |
| TPOX       |       | 222-250    | 2p25.3               | GAAT                  |
| D18S51     |       | 232-345    | 18q21.33             | AGAA                  |

# Cell line authentication Result Report

|          |                           |               |                                                |
|----------|---------------------------|---------------|------------------------------------------------|
| Do date. | 2023. 04. 14              | Method        | A-STR Genotyping analysis, 3730XL DNA analyzer |
| Reagent  | AmpFISTR®Identifiler® KIT | Percent Match | 100 %                                          |

| Cell name  | HeLa(Reference) |         | 3       |         |
|------------|-----------------|---------|---------|---------|
| Amelogenin | X               | X       | X       | X       |
| STR Locus  | Allele1         | Allele2 | Allele1 | Allele2 |
| D8S1179    |                 |         | 12      | 13      |
| D21S11     |                 |         | 27      | 28      |
| D7S820     | 8               | 12      | 8       | 12      |
| CSF1PO     | 9               | 10      | 9       | 10      |
| D3S1358    |                 |         | 15      | 18      |
| TH01       | 7               | 7       | 7       | 7       |
| D13S317    | 12              | 13.3    | 12      | 13.3    |
| D16S539    | 9               | 10      | 9       | 10      |
| D2S1338    |                 |         | 17      | 171     |
| D5S818     | 11              | 12      | 11      | 12      |
| FGA        |                 |         | 18      | 21      |
| D19S433    |                 |         | 13      | 14      |
| vWA        | 16              | 18      | 16      | 18      |
| TPOX       | 8               | 12      | 8       | 12      |
| D18S51     |                 |         | 16      | 16      |

## Interpretation of Results

\* Reference : ICLAC - Match Criteria for Human Cell Line Authentication

- 1 Is the percent match result in the range 0 - 55% ?
  - This result is consistent with the two samples being unrelated (different donors)
- 2 Is the percent match result in the range 56 - 79% ?
  - This result is indeterminant and may need further testing
- 3 Is the percent match result in the range 80 - 100% ?
  - This result is consistent with the two samples being related (same donor)

*Yang G.J.*

2023.04.14

# Raw Data Guide

- ① Sample name
- ② STR amplification kit
- ③ STR marker
- ④ X axis: Fragment size
- ⑤ Y axis: Relative fluorescence units (RFU)
- ⑥ STR repeat number (13 = 13 repeats)
- ⑦ Decimal point (9.3 = ATGC ATGC .... ATGC ATG)
- ⑧ sex determining marker (Female: XX / Male: XY)

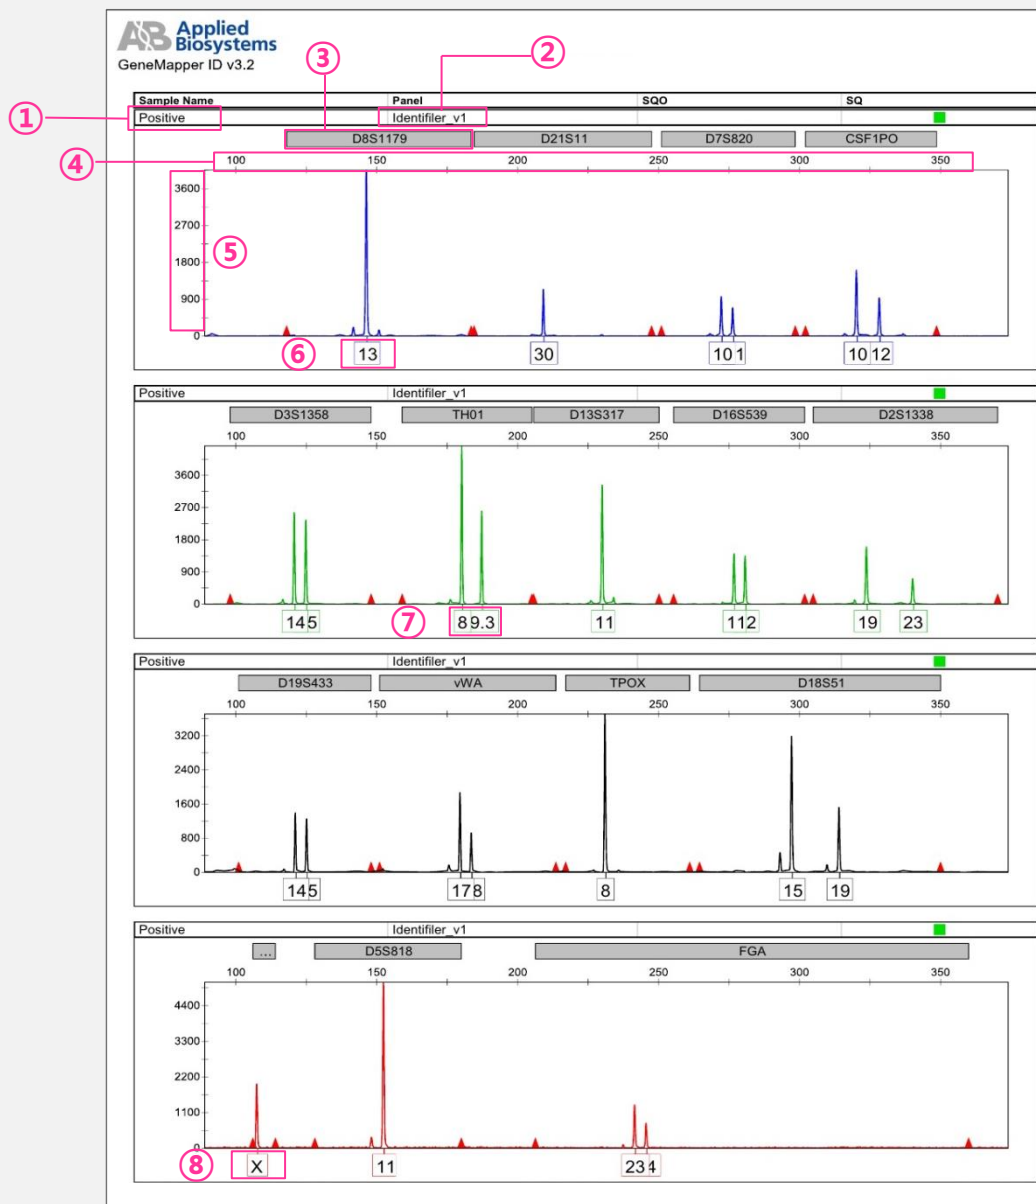

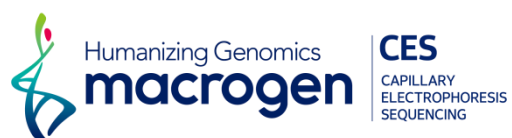

**CES**  
CAPILLARY  
ELECTROPHORESIS  
SEQUENCING
