# Supplementary material for: Comparative interactome analysis of α-arrestin families in human and Drosophila
Source: eLife. 2024 Jan 25;12:RP88328. doi: 10.7554/eLife.88328 (PMC10945707; doi:10.7554/eLife.88328)
Supplement: Supplementary file 1. — Information about α-arrestin proteins from human (A) and Drosophila (B). [file elife-88328-supp1.xlsx]

## Sheet: A. Human baits
Gene (HGNC ID)	Gene name(s) (Uniprot)	UniprotKB	Protein length
ARRDC1	Arrestin domain-containing protein 1 ; Alpha-arrestin 1	Q8N5I2 (ARRD1_HUMAN)	433
ARRDC2	Arrestin domain-containing protein 2	Q8TBH0 (ARRD2_HUMAN)	407
ARRDC3	Arrestin domain-containing protein 3 ; TBP-2-like inducible membrane protein ; TLIMP	Q96B67 (ARRD3_HUMAN)	414
ARRDC4	Arrestin domain-containing protein 4	Q8NCT1 (ARRD4_HUMAN)	418
ARRDC5	Arrestin domain-containing protein 5	A6NEK1 (ARRD5_HUMAN)	342
TXNIP	Thioredoxin-interacting protein ; Thioredoxin-binding proteinb 2 ; Vitamin D3 up-regulated protein 1	Q9H3M7 (TXNIP_HUMAN)	391

## Sheet: B. Drosophila baits
Gene (Annotation ID)	Gene (Flybase ID)	Gene (Symbols)	Gene name(s) (Uniprot)	UniprotKB	Protein length
CG10086	FBgn0037517	CG10086	Dmel\CG10086	Q8SYU5 (Q8SYU5_DROME)	469
CG1105	FBgn0037465	CG1105	Dmel\CG1105	Q9VI53 (Q9VI53_DROME)	422
CG14696	FBgn0037853	CG14696	Dmel\CG14696	Q9VGU7 (Q9VGU7_DROME)	457
CG18744	FBgn0042101	CG18744	Dmel\CG18744	Q9I7K7 (Q9I7K7_DROME)	410
CG18745	FBgn0042102	CG18745	Dmel\CG18745	Q9I7L0 (Q9I7L0_DROME)	433
CG18746	FBgn0042103	CG18746	Dmel\CG18746	Q9I7K8 (Q9I7K8_DROME)	438
CG18747	FBgn0042104	CG18747	Dmel\CG18747 ; Q9I7L1_DROME	Q9I7L1 (Q9I7L1_DROME)	418
CG18748	FBgn0042105	CG18748	Dmel\CG18748	Q4V467 (Q4V467_DROME)	359
CG2641	FBgn0037518	CG2641	Dmel\CG2641	Q9VI00 (Q9VI00_DROME)	429
CG2993	FBgn0037521	CG2993	Dmel\CG2993	Q9VHZ7 (Q9VHZ7_DROME)	511
CG4674	FBgn0037856	Leash	Leash ; CG32471, CG4674-RA, Dmel\CG4674	Q9VGU4 (Q9VGU4_DROME)	520
CG7047	FBgn0035103	Vdup1	Vdup1 ; Dmel\CG7047 ; dvdup1 ; Vdup1-RC ; Vdup1-RD	Q0E8K8 (Q0E8K8_DROME)	342
