# Supplementary material for: Comparative interactome analysis of α-arrestin families in human and Drosophila
Source: eLife. 2024 Jan 25;12:RP88328. doi: 10.7554/eLife.88328 (PMC10945707; doi:10.7554/eLife.88328)
Supplement: Supplementary file 2. — Positive and negative PPIs of α-arrestins for human (A, B) and Drosophila (C, D), respectively. [file elife-88328-supp2.xlsx]

## Sheet: A. Human positive PPIs
Bait (HGNC ID)	Prey (HGNC ID)	Average spectral count	Control counts	SAINTexpress scores	FDR	Reference
TXNIP	TXN	4	0|0|0|0|0|0|0|0|0	1	0	STRING ; G. Polekhina et al., 2013 ; Parth Patwari et al., 2006 ; Namal P.M.Liyanage et al., 2007 ; Louise L. Dunn et al., 2014 ; Shin-ichi Oka et al., 2006 ; Saori Matsuoka et al., 2008 ; Parth Patwari et al., 2009 ; Cameron World et al., 2011 ; GeneMania
TXNIP	ITCH	9.5	0|0|0|0|0|0|0|0|0	1	0	STRING ; Yanli Liu et al., 2016 ; Pingzhao Zhang et al., 2010 ; GeneMania
TXNIP	SLC2A1	2	0|0|0|0|0|0|0|0|0	0.97	0.01	GeneMania ; Ning Wu et al ., 2014
TXNIP	PRKAA1	2.5	0|1|0|1|0|2|0|1|2	0.06	0.38	Ning Wu et al ., 2014
TXNIP	ECD	8.5	0|0|0|0|0|0|0|0|0	1	0	GeneMania
TXNIP	KPNA2	20	7|13|14|12|11|14|18|9|14	0	0.65	Yumiko Nishinaka et al., 2004
ARRDC4	NEDD4L	35	0|0|0|0|0|0|0|0|0	1	0	STRING ; Fortune F. Shea et al., 2012
ARRDC4	WWP2	8	0|0|0|0|0|0|0|0|0	1	0	STRING ; Fortune F. Shea et al., 2012 ; GeneMania
ARRDC4	ITCH	11.5	0|0|0|0|0|0|0|0|0	1	0	STRING ; Fortune F. Shea et al., 2012 ; GeneMania
ARRDC3	BAG3	5.5	2|4|2|7|2|8|21|4|0	0	0.67	STRING ; ThomasRolland et al., 2014
ARRDC3	ITCH	10	0|0|0|0|0|0|0|0|0	1	0	STRING ; Loredana Puca & Christel Brou, 2014 ; Fortune F. Shea et al., 2012 ; GeneMania
ARRDC3	WWP1	7	0|0|0|0|0|0|0|0|0	1	0	STRING ; Susanne Rauch & Juan Martin-Serrano et al., 2011 ; GeneMania
ARRDC3	NEDD4	7	0|0|0|0|0|0|0|0|0	1	0	STRING ; Joseph F Nabhan et al., 2010 ; Sang‐Oh Han et al., 2012 ; Fortune F. Shea et al., 2012
ARRDC3	NEDD4L	28	0|0|0|0|0|0|0|0|0	1	0	STRING ; Fortune F. Shea et al., 2012
ARRDC2	WWP1	67.5	0|0|0|0|0|0|0|0|0	1	0	STRING ; Susanne Rauch & Juan Martin-Serrano et al., 2011 ; GeneMania
ARRDC1	TSG101	8.5	0|0|0|0|0|0|0|0|0	1	0	Joseph F. Nabhan et al., 2012
ARRDC1	KCTD2	1	0|0|0|0|0|0|0|0|0	0.48	0.18	STRING ; Bioplex
ARRDC1	WWP2	59	0|0|0|0|0|0|0|0|0	1	0	STRING ; Bioplex ; Haiyuan Yu et al., 2011 ; Susanne Rauch & Juan Martin-Serrano et al., 2011 ; Joseph F Nabhan et al., 2012 ; Fortune F. Shea et al., 2012 ; GeneMania
ARRDC1	ITCH	47.5	0|0|0|0|0|0|0|0|0	1	0	STRING ; Bioplex ; Loredana Puca & Christel Brou, 2014 ; Susanne Rauch & Juan Martin-Serrano et al., 2011 ; Fortune F. Shea et al., 2012 ; GeneMania
ARRDC1	WWP1	78.5	0|0|0|0|0|0|0|0|0	1	0	STRING ; Susanne Rauch & Juan Martin-Serrano et al., 2011 ; GeneMania
ARRDC1	RCOR3	1	0|0|0|0|0|0|0|0|0	0.48	0.18	Bioplex
ARRDC1	RCOR1	2	0|0|0|0|0|0|0|0|0	0.5	0.09	Bioplex
ARRDC1	KCTD5	1.5	0|0|0|0|0|0|0|0|0	0.48	0.18	STRING ; Bioplex
ARRDC1	NEDD4	73	0|0|0|0|0|0|0|0|0	1	0	STRING ; Bioplex ; Susanne Rauch & Juan Martin-Serrano et al., 2011
ARRDC1	ZMYM2	14	0|0|0|0|0|0|0|0|0	1	0	Bioplex
ARRDC1	KDM1A	6	0|0|0|2|0|2|1|0|0	0.77	0.02	Bioplex
ARRDC1	PDCD6IP	5	0|5|11|3|0|0|0|0|0	0	0.61	GeneMania
ARRDC1	NEDD4L	357	0|0|0|0|0|0|0|0|0	1	0	STRING ; Bioplex
ARRDC1	HECW2	23	0|0|0|0|0|0|0|0|0	1	0	STRING ; Bioplex
ARRDC1	VPS28	1	0|0|0|0|0|0|0|0|0	0.48	0.18	Bioplex

## Sheet: B. Human negative PPIs
Bait (HGNC ID)	Prey (HGNC ID)	Average spectral count	Control counts	SAINTexpress scores	FDR
ARRDC4	HSPA2	57	0|24|24|26|0|23|31|25|0	0	0.63
ARRDC4	HIST1H4A	10	4|2|23|5|8|2|5|1|2	0	0.65
ARRDC4	NOP56	3.5	5|0|0|2|2|2|3|0|0	0	0.52
ARRDC4	ACTG1	63.5	28|43|81|40|56|14|22|16|41	0	0.68
ARRDC4	HSPA5	51.5	14|35|67|33|20|32|43|25|19	0	0.68
ARRDC4	HSPA8	167.5	39|73|74|72|36|76|95|61|52	0	0.68
ARRDC4	PSPC1	1.5	0|3|3|2|2|4|0|1|0	0	0.57
ARRDC4	MYL6	3	2|4|10|0|3|0|0|0|0	0	0.63
ARRDC4	PRPF8	20.5	5|10|7|6|8|2|9|13|3	0.01	0.47
ARRDC4	CALM2	3.5	1|1|3|0|4|0|0|1|2	0	0.49
ARRDC4	ACTG2	8	0|0|0|12|0|5|6|4|12	0	0.61
ARRDC4	CALM1	3.5	1|1|3|0|4|0|0|1|2	0	0.49
ARRDC4	EIF3F	1	0|2|2|4|0|0|1|0|0	0	0.69
ARRDC4	GNB2L1	3	0|5|9|9|0|9|7|5|6	0	0.69
ARRDC4	HIST1H2BC	5	2|1|8|2|7|1|3|0|0	0	0.61
ARRDC4	MARCKS	1.5	0|6|9|12|0|1|3|0|0	0	0.69
ARRDC4	ACTC1	29.5	0|24|47|12|32|5|6|4|12	0	0.68
ARRDC4	WDR61	3	0|0|0|1|0|0|2|0|0	0.5	0.06
ARRDC4	DHX9	9.5	3|9|11|5|5|3|11|3|3	0	0.65
ARRDC4	DDX3X	9.5	7|12|12|6|9|8|7|4|24	0	0.67
ARRDC4	CAPZA2	1.5	2|3|5|3|3|1|0|0|2	0	0.69
ARRDC4	SLC25A1	5.5	4|6|4|5|6|5|10|10|6	0	0.65
ARRDC4	SLC25A6	46	12|32|19|18|15|28|43|35|16	0	0.68
ARRDC4	SLC25A5	50.5	11|31|20|23|16|33|48|36|18	0	0.68
ARRDC4	SLC25A4	34	0|23|14|13|11|20|29|26|11	0	0.67
ARRDC4	RPL17	3	2|5|5|8|5|5|11|3|2	0	0.69
ARRDC4	RPL10	6	6|5|7|2|12|2|7|2|5	0	0.65
ARRDC4	RPL12	1	2|3|4|6|4|6|9|2|2	0	0.69
ARRDC4	RPL13	4.5	7|9|11|13|7|11|15|4|5	0	0.69
ARRDC4	RPL18	1	2|4|7|5|2|1|0|0|0	0	0.69
ARRDC4	H2AFV	5	4|2|6|0|5|0|3|0|0	0	0.58
ARRDC4	MYL12A	2	1|3|5|0|1|0|0|1|1	0	0.52
ARRDC4	SNRPD2	1	0|2|2|1|2|0|3|2|0	0	0.51
ARRDC4	RPS6	3.5	2|11|11|8|2|2|9|2|3	0	0.69
ARRDC4	LIMA1	19.5	6|0|1|0|17|0|0|0|5	0	0.51
ARRDC4	TUBB4A	167.5	74|158|116|138|72|186|261|160|76	0	0.69
ARRDC4	H2AFZ	2	1|2|6|0|2|0|3|0|0	0	0.58
ARRDC4	VIM	161.5	62|32|51|53|145|70|65|35|82	0	0.69
ARRDC4	DDX5	7	5|8|16|8|4|8|7|7|14	0	0.67
ARRDC4	DDX6	1	0|8|4|1|0|3|2|5|5	0	0.69
ARRDC4	TUBB4B	209	95|213|163|168|94|231|355|216|103	0	0.69
ARRDC4	HNRNPH1	7.5	3|17|14|2|8|4|11|13|6	0	0.69
ARRDC4	ACTB	63.5	28|43|81|40|56|14|22|16|41	0	0.68
ARRDC4	YBX1	6.5	3|17|16|7|4|11|30|15|6	0	0.69
ARRDC4	EIF4G1	1.5	0|12|12|7|0|0|1|0|0	0	0.69
ARRDC4	YBX3	6	0|12|15|9|4|8|32|9|0	0	0.69
ARRDC4	ACTA2	8	0|0|0|12|0|5|6|4|12	0	0.61
ARRDC4	CAPZB	4	2|2|7|3|1|0|0|0|0	0	0.53
ARRDC4	ACTA1	29.5	0|24|47|12|32|5|6|4|12	0	0.68
ARRDC4	ELAVL1	1	0|3|3|3|0|1|8|1|1	0	0.69
ARRDC4	RPS27L	2.5	4|2|0|16|0|16|25|18|2	0	0.69
ARRDC4	PABPC1	3	0|17|18|16|7|13|22|9|11	0	0.69
ARRDC4	RPL4	2	0|5|14|5|0|0|3|0|0	0	0.69
ARRDC4	PABPC4	1.5	5|9|9|6|4|8|10|6|5	0	0.69
ARRDC4	GAPDH	6	3|33|66|19|3|6|13|13|5	0	0.69
ARRDC4	HELZ	7	8|13|5|16|5|30|45|29|11	0	0.69
ARRDC4	YTHDF2	6.5	0|2|1|1|0|3|6|1|1	0.02	0.43
ARRDC4	CLTC	8	2|26|38|13|5|2|7|2|0	0	0.69
ARRDC4	XRCC5	1.5	0|5|6|5|0|2|5|0|0	0	0.62
ARRDC4	KRT9	19.5	34|72|125|41|67|54|22|90|123	0	0.69
ARRDC4	XRCC6	5	3|11|21|11|0|6|14|0|0	0	0.69
ARRDC4	RPL7A	1.5	3|11|13|5|2|0|12|1|0	0	0.69
ARRDC4	UBAP2L	8	3|17|7|14|2|13|43|48|13	0	0.69
ARRDC4	CCT2	28	0|19|24|11|0|2|7|0|0	0	0.64
ARRDC4	TUBA1B	62	15|73|0|65|72|102|0|90|7	0	0.69
ARRDC4	KHSRP	1.5	0|18|22|15|0|8|18|6|0	0	0.69
ARRDC4	CCT4	19	2|20|18|10|4|3|6|0|0	0	0.65
ARRDC4	JUP	18	6|3|50|5|8|5|3|6|9	0	0.68
ARRDC4	PCBP2	11	3|5|12|12|7|8|10|3|3	0	0.65
ARRDC4	TIMM13	1	2|2|2|1|2|1|1|2|0	0	0.69
ARRDC4	PCBP1	9	3|8|16|11|5|9|13|5|3	0	0.67
ARRDC4	RBM39	3.5	4|3|3|3|2|0|0|3|2	0	0.52
ARRDC4	PKM	5	5|34|48|25|0|6|7|6|2	0	0.69
ARRDC4	RCN2	20.5	5|27|13|13|12|23|37|26|9	0	0.68
ARRDC4	TUBB6	116.5	38|97|77|65|43|107|160|109|47	0	0.69
ARRDC4	ALYREF	5.5	0|2|4|5|5|2|3|3|2	0	0.55
ARRDC4	PARP1	2.5	0|1|2|5|0|5|5|0|2	0	0.6
ARRDC4	HIST1H2BD	2.5	1|0|4|0|4|0|0|0|0	0	0.52
ARRDC4	SFPQ	3	0|7|6|6|6|7|6|5|3	0	0.69
ARRDC4	POLR2C	8	0|2|0|3|2|3|5|2|0	0.15	0.35
ARRDC4	POLR2B	14	4|3|3|3|2|7|9|3|0	0.19	0.33
ARRDC4	HIST1H2BL	2.5	1|0|4|0|4|0|0|0|0	0	0.52
ARRDC4	HIST1H2BM	2.5	1|0|4|0|4|0|0|0|0	0	0.52
ARRDC4	HIST1H2BN	5	2|1|8|2|7|1|3|0|0	0	0.61
ARRDC4	TUBB2A	196	89|208|146|163|93|231|329|215|48	0	0.69
ARRDC4	HIST1H2BK	2.5	1|0|4|0|4|0|0|0|0	0	0.52
ARRDC4	LMNB1	1.5	3|0|7|4|3|4|5|0|0	0	0.69
ARRDC4	MTHFD1	1.5	0|8|9|13|0|6|5|1|0	0	0.69
ARRDC4	TUBB	252	112|247|169|198|122|272|411|264|122	0	0.69
ARRDC4	FLOT1	6.5	6|17|4|14|23|19|16|15|31	0	0.69
ARRDC4	MYBBP1A	6	3|6|2|8|5|5|9|2|0	0	0.64
ARRDC4	RPL17-C18orf32	1	0|0|0|2|0|1|2|0|0	0	0.69
ARRDC4	EIF4A1	9.5	4|32|37|8|1|3|7|4|5	0	0.69
ARRDC4	KRT19	145.5	54|49|38|169|73|243|268|69|95	0	0.69
ARRDC4	KRT18	55	31|25|11|54|39|96|134|30|58	0	0.69
ARRDC4	MYH10	6.5	1|11|19|0|5|0|0|0|0	0	0.66
ARRDC4	KRT77	4	0|0|33|0|0|33|19|22|16	0	0.69
ARRDC4	MYH9	6.5	3|17|98|19|4|0|3|0|0	0	0.69
ARRDC4	RPLP2	8.5	9|18|22|15|9|15|25|12|12	0	0.69
ARRDC4	RPLP1	2	0|3|3|2|0|1|5|2|2	0	0.57
ARRDC4	RPLP0	8.5	8|9|13|10|9|14|17|6|9	0	0.69
ARRDC4	MYO1C	12	3|4|7|11|7|18|18|5|10	0	0.67
ARRDC4	RPS11	1.5	2|3|2|3|0|3|5|0|3	0	0.57
ARRDC4	PRKDC	117	13|11|13|34|9|36|49|9|6	1	0
ARRDC4	RPS7	1.5	0|4|10|2|0|0|2|2|2	0	0.69
ARRDC4	KRT2	18	38|69|164|21|43|185|73|141|79	0	0.69
ARRDC4	KRT1	34	59|82|344|76|87|166|73|154|180	0	0.69
ARRDC4	RPS3	4	4|19|24|14|4|9|23|5|5	0	0.69
ARRDC4	RPS2	4	1|7|11|5|3|5|8|3|3	0	0.69
ARRDC4	ATP5B	14	6|50|67|41|5|9|18|11|4	0	0.69
ARRDC4	VDAC1	9.5	0|14|19|14|0|10|12|5|3	0	0.67
ARRDC4	KRT8	218	74|67|36|232|122|347|461|109|194	0	0.69
ARRDC4	RPS9	3	6|9|10|7|4|6|11|4|4	0	0.69
ARRDC4	RPS8	2.5	2|7|14|9|3|3|3|1|4	0	0.69
ARRDC4	HSP90AB1	109.5	16|64|99|48|13|22|37|19|11	0	0.68
ARRDC4	RPL8	1.5	0|2|9|4|0|1|2|0|2	0	0.69
ARRDC4	HIST1H2BH	2.5	1|0|4|0|4|0|0|0|0	0	0.52
ARRDC4	ATP5A1	17.5	16|54|51|33|13|37|51|37|15	0	0.69
ARRDC4	H1FX	1	1|0|0|3|1|1|3|0|0	0	0.69
ARRDC4	HNRNPU	2.5	0|9|18|8|3|1|3|3|9	0	0.69
ARRDC4	C1QBP	8	7|12|8|9|4|2|3|2|4	0	0.65
ARRDC4	HNRNPK	4.5	1|12|19|12|1|4|6|2|2	0	0.69
ARRDC4	HNRNPM	11	2|7|7|24|11|26|28|9|6	0	0.68
ARRDC4	RBM14	4	5|7|4|8|7|9|13|4|8	0	0.69
ARRDC4	BSG	2	0|2|1|4|0|2|4|3|0	0	0.54
ARRDC4	RPL27A	1.5	2|3|5|3|1|3|5|4|1	0	0.69
ARRDC4	HNRNPF	11.5	2|13|7|3|9|4|11|13|3	0	0.65
ARRDC4	RPS26	1.5	3|7|6|5|3|4|9|6|1	0	0.69
ARRDC4	RPS27	7	5|19|9|17|3|17|28|23|19	0	0.69
ARRDC4	RPS25	2.5	3|5|5|10|3|4|6|3|2	0	0.69
ARRDC4	RPS20	1.5	0|5|8|4|0|2|6|3|2	0	0.69
ARRDC4	HNRNPA0	1.5	0|2|3|2|4|0|1|2|4	0	0.69
ARRDC4	HNRNPA1	1.5	0|7|15|4|2|0|3|1|3	0	0.69
ARRDC4	ENO1	6	5|82|94|41|5|6|13|5|0	0	0.69
ARRDC4	PRDX1	7.5	2|9|22|18|1|3|3|0|0	0	0.68
ARRDC4	IGF2BP1	7	4|8|10|10|4|8|13|9|3	0	0.69
ARRDC4	HIST1H1E	4.5	2|4|5|7|5|4|5|3|3	0	0.6
ARRDC4	IGF2BP3	14	2|7|7|9|3|7|5|4|3	0	0.48
ARRDC4	HNRNPUL1	3.5	2|22|5|10|3|12|25|31|4	0	0.69
ARRDC4	HIST1H1C	4.5	2|4|5|7|5|4|5|3|3	0	0.6
ARRDC4	STAU1	6	2|1|0|8|3|5|14|2|4	0	0.65
ARRDC4	HNRNPC	9	5|2|13|10|15|9|11|2|2	0	0.67
ARRDC4	MYL12B	1	0|1|3|0|0|0|0|0|0	0	0.69
ARRDC4	RPSA	3.5	2|7|11|7|2|5|8|4|3	0	0.69
ARRDC4	IRS4	153.5	36|35|21|29|53|39|64|68|45	0.2	0.33
ARRDC4	RTCB	1	0|3|4|7|0|2|4|0|5	0	0.69
ARRDC4	ACTN4	17.5	5|15|45|10|21|0|0|0|10	0	0.68
ARRDC4	RPS4X	2	4|16|13|11|9|10|14|8|11	0	0.69
ARRDC4	SRRM1	3.5	1|6|5|2|8|3|10|9|6	0	0.69
ARRDC4	BASP1	2.5	0|10|15|8|2|0|5|0|0	0	0.69
ARRDC4	RPL10A	1	2|4|10|2|4|1|4|0|0	0	0.69
ARRDC4	ATP1A1	11.5	7|10|6|19|4|13|16|7|5	0	0.67
ARRDC4	HSP90AA1	114.5	10|49|67|46|10|20|32|15|7	0	0.66
ARRDC4	FBL	12.5	0|3|5|2|4|4|5|7|5	0.27	0.31
ARRDC4	RPS13	1	2|10|10|7|5|4|11|7|4	0	0.69
ARRDC4	TMPO	3	2|10|9|12|5|3|10|5|2	0	0.69
ARRDC4	RPS10	5.5	2|7|11|5|7|4|12|5|3	0	0.69
ARRDC4	RPS16	2	2|7|12|5|2|4|11|2|2	0	0.69
ARRDC4	RPL23A	2	3|7|6|11|3|3|13|2|2	0	0.69
ARRDC4	RPS14	4.5	6|10|13|7|8|10|15|7|6	0	0.69
ARRDC4	PHB2	6	4|14|12|7|3|7|11|7|7	0	0.69
ARRDC4	EEF1A1	31	10|62|60|16|38|18|52|50|12	0	0.69
ARRDC4	RPS19	1.5	3|7|8|8|3|4|12|3|3	0	0.69
ARRDC4	RPS18	4	4|13|12|9|4|7|12|7|6	0	0.69
ARRDC4	SF3B1	1.5	0|0|2|6|0|2|5|4|0	0	0.69
ARRDC4	SF3B3	4	0|10|5|5|3|4|2|4|5	0	0.69
ARRDC4	SF3B2	1	1|4|5|0|1|0|0|5|0	0	0.69
ARRDC4	HIST1H1D	4.5	2|4|5|7|5|4|5|3|3	0	0.6
ARRDC4	HSPA1B	149	24|55|59|45|23|45|63|49|35	0.5	0.09
ARRDC4	HSPA1A	74	12|28|30|23|11|22|32|24|17	0.41	0.29
ARRDC4	HIST2H2BF	5	2|1|8|2|7|1|3|0|0	0	0.61
ARRDC4	SPTBN1	18	4|10|7|6|13|0|0|0|1	0	0.54
ARRDC4	YWHAZ	16.5	0|12|28|10|5|6|9|4|3	0	0.66
ARRDC4	DDX17	6.5	0|10|10|7|0|3|5|3|13	0	0.66
ARRDC4	RPL29	1.5	2|2|3|4|2|4|3|2|2	0	0.69
ARRDC4	NOP58	2	2|1|6|2|2|1|6|0|0	0	0.61
ARRDC4	NAP1L1	3.5	3|7|5|3|0|0|3|1|0	0	0.6
ARRDC4	RPL27	3	2|7|9|3|4|2|7|0|2	0	0.69
ARRDC4	YWHAQ	18	4|6|15|6|6|4|6|2|2	0.01	0.46
ARRDC4	RPL21	1	2|5|8|4|5|1|8|0|0	0	0.69
ARRDC4	RPL23	63.5	62|65|19|63|55|63|116|72|61	0	0.69
ARRDC4	RPL22	1	1|1|3|3|1|1|2|0|1	0	0.69
ARRDC4	HSPD1	25	16|53|52|29|18|28|35|26|16	0	0.69
ARRDC4	HNRNPA2B1	4.5	1|8|19|8|6|0|4|2|2	0	0.69
ARRDC4	YWHAB	14.5	0|9|22|9|0|0|8|0|0	0	0.65
ARRDC4	CCT6A	22	0|8|13|9|0|3|5|0|0	0.4	0.3
ARRDC4	YWHAG	15	4|7|14|7|6|4|6|3|2	0	0.54
ARRDC4	YWHAE	24	0|25|19|12|9|7|11|6|3	0	0.66
ARRDC4	PABPN1	1	0|0|0|0|0|0|0|0|0	0.48	0.18
ARRDC4	ATAD3A	71.5	59|81|45|51|71|88|146|77|71	0	0.69
ARRDC4	KRT10	21	41|80|299|26|48|134|77|148|100	0	0.69
ARRDC4	CFL1	1	0|5|8|5|0|0|1|1|0	0	0.69
ARRDC4	FLNA	13.5	3|44|57|55|16|2|15|0|0	0	0.69
ARRDC4	RPL28	2	0|3|2|3|0|3|3|0|0	0	0.54
ARRDC4	DDX21	3	1|7|7|5|4|1|3|0|0	0	0.63
ARRDC4	RPL38	7.5	6|19|3|14|7|13|28|14|12	0	0.69
ARRDC4	PPP1CA	4	0|4|0|2|0|2|5|4|2	0	0.53
ARRDC4	RPL36	1	3|0|0|3|4|0|3|0|0	0	0.57
ARRDC4	SRRM2	7	7|2|3|8|4|0|0|0|0	0	0.6
ARRDC4	RPA1	1	1|0|0|6|2|0|5|0|0	0	0.69
ARRDC4	RPL31	1.5	3|4|4|4|2|3|4|1|0	0	0.69
ARRDC4	SPTAN1	17.5	4|5|27|5|15|0|0|0|0	0	0.66
ARRDC4	NCL	4	4|18|23|21|5|3|7|0|9	0	0.69
ARRDC4	RPL24	6.5	4|5|4|12|6|8|11|4|5	0	0.66
ARRDC4	PHB	1	0|10|10|4|0|3|3|3|3	0	0.69
ARRDC4	IMMT	15	3|8|11|7|0|6|12|6|4	0	0.62
ARRDC4	ILF3	5	3|0|8|11|6|8|11|0|3	0	0.65
ARRDC4	ILF2	5	0|7|11|10|9|12|11|4|3	0	0.69
ARRDC5	HSPA2	30	0|24|24|26|0|23|31|25|0	0	0.68
ARRDC5	HIST1H4A	2.5	4|2|23|5|8|2|5|1|2	0	0.69
ARRDC5	RPL26	1	1|1|2|2|1|1|2|1|0	0	0.47
ARRDC5	ACTG1	40.5	28|43|81|40|56|14|22|16|41	0	0.69
ARRDC5	HSPA5	65	14|35|67|33|20|32|43|25|19	0	0.68
ARRDC5	HSPA8	113	39|73|74|72|36|76|95|61|52	0	0.69
ARRDC5	PSPC1	3.5	0|3|3|2|2|4|0|1|0	0	0.52
ARRDC5	PRPF8	14	5|10|7|6|8|2|9|13|3	0	0.6
ARRDC5	PUF60	4	0|3|4|2|0|0|4|3|0	0	0.48
ARRDC5	DHX15	6	6|4|9|1|2|3|0|4|2	0	0.61
ARRDC5	EIF3L	4.5	0|4|7|2|0|0|3|0|0	0	0.57
ARRDC5	ACTG2	7	0|0|0|12|0|5|6|4|12	0	0.63
ARRDC5	CALM1	4	1|1|3|0|4|0|0|1|2	0.01	0.45
ARRDC5	EIF3E	2	0|2|3|3|0|1|3|0|0	0	0.52
ARRDC5	EIF3F	1	0|2|2|4|0|0|1|0|0	0	0.69
ARRDC5	GNB2L1	5.5	0|5|9|9|0|9|7|5|6	0	0.65
ARRDC5	MARCKS	5.5	0|6|9|12|0|1|3|0|0	0	0.63
ARRDC5	ACTC1	16	0|24|47|12|32|5|6|4|12	0	0.68
ARRDC5	EIF4ENIF1	2	2|1|0|2|2|3|1|0|4	0	0.52
ARRDC5	PTBP1	6	0|11|16|7|0|2|5|2|0	0	0.66
ARRDC5	WDR61	1	0|0|0|1|0|0|2|0|0	0.11	0.36
ARRDC5	DHX9	9	3|9|11|5|5|3|11|3|3	0	0.65
ARRDC5	DDX3X	9.5	7|12|12|6|9|8|7|4|24	0	0.67
ARRDC5	ATXN2L	1.5	0|3|2|0|0|3|1|0|5	0	0.57
ARRDC5	PRRC2A	5.5	0|2|0|9|0|10|18|0|4	0	0.67
ARRDC5	SLC25A6	27	12|32|19|18|15|28|43|35|16	0	0.68
ARRDC5	SLC25A5	29	11|31|20|23|16|33|48|36|18	0	0.68
ARRDC5	SLC25A4	11.5	0|23|14|13|11|20|29|26|11	0	0.68
ARRDC5	RPL14	2.5	1|2|3|3|1|1|2|1|1	0	0.5
ARRDC5	FXR2	3	0|3|2|3|0|1|4|3|2	0	0.54
ARRDC5	RPL17	6.5	2|5|5|8|5|5|11|3|2	0	0.64
ARRDC5	RPL10	3.5	6|5|7|2|12|2|7|2|5	0	0.69
ARRDC5	RPL11	4	2|3|6|3|2|1|1|2|2	0	0.55
ARRDC5	RPL12	4.5	2|3|4|6|4|6|9|2|2	0	0.64
ARRDC5	RPL13	16	7|9|11|13|7|11|15|4|5	0	0.65
ARRDC5	RPL18	3.5	2|4|7|5|2|1|0|0|0	0	0.61
ARRDC5	RPL19	2.5	1|5|6|6|1|0|1|0|0	0	0.63
ARRDC5	KRT10	69	41|80|299|26|48|134|77|148|100	0	0.69
ARRDC5	MYL12A	3	1|3|5|0|1|0|0|1|1	0	0.51
ARRDC5	SNRPD2	2.5	0|2|2|1|2|0|3|2|0	0.01	0.46
ARRDC5	RPS6	2	2|11|11|8|2|2|9|2|3	0	0.69
ARRDC5	TUBB4B	203	95|213|163|168|94|231|355|216|103	0	0.69
ARRDC5	TUBB4A	151.5	74|158|116|138|72|186|261|160|76	0	0.69
ARRDC5	KRT1	58.5	59|82|344|76|87|166|73|154|180	0	0.69
ARRDC5	VIM	59	62|32|51|53|145|70|65|35|82	0	0.69
ARRDC5	DDX5	9.5	5|8|16|8|4|8|7|7|14	0	0.66
ARRDC5	DDX6	3.5	0|8|4|1|0|3|2|5|5	0	0.63
ARRDC5	LIMA1	5.5	6|0|1|0|17|0|0|0|5	0	0.64
ARRDC5	HNRNPH1	14.5	3|17|14|2|8|4|11|13|6	0	0.66
ARRDC5	ACTB	40.5	28|43|81|40|56|14|22|16|41	0	0.69
ARRDC5	YBX1	17.5	3|17|16|7|4|11|30|15|6	0	0.67
ARRDC5	EIF4G1	1.5	0|12|12|7|0|0|1|0|0	0	0.69
ARRDC5	YBX3	16.5	0|12|15|9|4|8|32|9|0	0	0.66
ARRDC5	ACTA2	7	0|0|0|12|0|5|6|4|12	0	0.63
ARRDC5	ACTA1	16	0|24|47|12|32|5|6|4|12	0	0.68
ARRDC5	ELAVL1	2.5	0|3|3|3|0|1|8|1|1	0	0.61
ARRDC5	RPS27L	1	4|2|0|16|0|16|25|18|2	0	0.69
ARRDC5	RPL9	1	0|2|4|2|0|2|4|0|1	0	0.69
ARRDC5	RPL6	7.5	0|9|16|4|0|0|1|0|0	0	0.64
ARRDC5	PABPC1	12.5	0|17|18|16|7|13|22|9|11	0	0.68
ARRDC5	RPL4	7	0|5|14|5|0|0|3|0|0	0	0.63
ARRDC5	RPL5	1.5	0|1|4|1|0|1|3|0|0	0	0.53
ARRDC5	PABPC4	8	5|9|9|6|4|8|10|6|5	0	0.65
ARRDC5	GAPDH	16.5	3|33|66|19|3|6|13|13|5	0	0.68
ARRDC5	HELZ	18	8|13|5|16|5|30|45|29|11	0	0.68
ARRDC5	YTHDF2	2.5	0|2|1|1|0|3|6|1|1	0	0.57
ARRDC5	CLTC	20	2|26|38|13|5|2|7|2|0	0	0.68
ARRDC5	XRCC5	2.5	0|5|6|5|0|2|5|0|0	0	0.62
ARRDC5	KRT9	24	34|72|125|41|67|54|22|90|123	0	0.69
ARRDC5	XRCC6	5.5	3|11|21|11|0|6|14|0|0	0	0.69
ARRDC5	RPL7A	8.5	3|11|13|5|2|0|12|1|0	0	0.66
ARRDC5	ATAD3A	103	59|81|45|51|71|88|146|77|71	0	0.69
ARRDC5	UBAP2L	14.5	3|17|7|14|2|13|43|48|13	0	0.68
ARRDC5	CCT2	9	0|19|24|11|0|2|7|0|0	0	0.67
ARRDC5	TUBA1B	90.5	15|73|0|65|72|102|0|90|7	0	0.69
ARRDC5	KHSRP	9.5	0|18|22|15|0|8|18|6|0	0	0.68
ARRDC5	CCT4	9	2|20|18|10|4|3|6|0|0	0	0.67
ARRDC5	JUP	9.5	6|3|50|5|8|5|3|6|9	0	0.68
ARRDC5	PCBP2	12	3|5|12|12|7|8|10|3|3	0	0.64
ARRDC5	TIMM13	2.5	2|2|2|1|2|1|1|2|0	0.02	0.42
ARRDC5	PCBP1	10	3|8|16|11|5|9|13|5|3	0	0.66
ARRDC5	RPS3A	2	0|9|12|10|0|4|10|3|2	0	0.69
ARRDC5	GTF2I	1.5	0|7|3|4|0|0|3|0|0	0	0.61
ARRDC5	RBM39	2.5	4|3|3|3|2|0|0|3|2	0	0.55
ARRDC5	PKM	24.5	5|34|48|25|0|6|7|6|2	0	0.68
ARRDC5	RCN2	23.5	5|27|13|13|12|23|37|26|9	0	0.68
ARRDC5	TUBB6	99	38|97|77|65|43|107|160|109|47	0	0.69
ARRDC5	ALYREF	3	0|2|4|5|5|2|3|3|2	0	0.6
ARRDC5	RPL35	3.5	1|5|4|4|2|1|4|2|2	0	0.58
ARRDC5	SFPQ	6.5	0|7|6|6|6|7|6|5|3	0	0.61
ARRDC5	IMMT	15.5	3|8|11|7|0|6|12|6|4	0	0.58
ARRDC5	POLR2C	5	0|2|0|3|2|3|5|2|0	0	0.48
ARRDC5	POLR2B	5	4|3|3|3|2|7|9|3|0	0	0.63
ARRDC5	CALM2	4	1|1|3|0|4|0|0|1|2	0.01	0.45
ARRDC5	TUBB2A	201	89|208|146|163|93|231|329|215|48	0	0.69
ARRDC5	MTHFD1	2	0|8|9|13|0|6|5|1|0	0	0.69
ARRDC5	TUBB	233.5	112|247|169|198|122|272|411|264|122	0	0.69
ARRDC5	FLOT1	139	6|17|4|14|23|19|16|15|31	1	0
ARRDC5	SPTBN1	2.5	4|10|7|6|13|0|0|0|1	0	0.69
ARRDC5	SERBP1	2	0|4|6|3|0|0|1|0|2	0	0.58
ARRDC5	RPL17-C18orf32	1	0|0|0|2|0|1|2|0|0	0	0.69
ARRDC5	EIF4A1	6.5	4|32|37|8|1|3|7|4|5	0	0.69
ARRDC5	HNRNPR	3.5	0|3|3|0|0|0|0|1|0	0.03	0.42
ARRDC5	KRT19	91.5	54|49|38|169|73|243|268|69|95	0	0.69
ARRDC5	KRT18	23.5	31|25|11|54|39|96|134|30|58	0	0.69
ARRDC5	MYH10	1	1|11|19|0|5|0|0|0|0	0	0.69
ARRDC5	MYH9	5	3|17|98|19|4|0|3|0|0	0	0.69
ARRDC5	CFL1	4.5	0|5|8|5|0|0|1|1|0	0	0.58
ARRDC5	SF3B4	1	0|2|1|1|0|2|1|2|0	0	0.47
ARRDC5	RPLP2	25.5	9|18|22|15|9|15|25|12|12	0	0.67
ARRDC5	RPLP1	3.5	0|3|3|2|0|1|5|2|2	0	0.54
ARRDC5	RPLP0	15	8|9|13|10|9|14|17|6|9	0	0.66
ARRDC5	MYO1C	11.5	3|4|7|11|7|18|18|5|10	0	0.66
ARRDC5	RPS11	2	2|3|2|3|0|3|5|0|3	0	0.69
ARRDC5	RPS15A	2	0|3|5|1|0|1|2|0|0	0	0.56
ARRDC5	PRKDC	63.5	13|11|13|34|9|36|49|9|6	0	0.68
ARRDC5	KRT2	57	38|69|164|21|43|185|73|141|79	0	0.69
ARRDC5	RPS5	1	0|1|3|1|0|1|2|0|0	0	0.69
ARRDC5	RPS3	10	4|19|24|14|4|9|23|5|5	0	0.68
ARRDC5	RPS2	4	1|7|11|5|3|5|8|3|3	0	0.69
ARRDC5	ATP5B	25	6|50|67|41|5|9|18|11|4	0	0.69
ARRDC5	VDAC1	13	0|14|19|14|0|10|12|5|3	0	0.67
ARRDC5	KRT8	121	74|67|36|232|122|347|461|109|194	0	0.69
ARRDC5	RPS9	4.5	6|9|10|7|4|6|11|4|4	0	0.69
ARRDC5	RPS8	4	2|7|14|9|3|3|3|1|4	0	0.69
ARRDC5	HSP90AB1	62.5	16|64|99|48|13|22|37|19|11	0	0.69
ARRDC5	RPL8	4.5	0|2|9|4|0|1|2|0|2	0	0.58
ARRDC5	ATP5A1	29	16|54|51|33|13|37|51|37|15	0	0.69
ARRDC5	H1FX	2	1|0|0|3|1|1|3|0|0	0	0.49
ARRDC5	HNRNPU	7	0|9|18|8|3|1|3|3|9	0	0.66
ARRDC5	C1QBP	5	7|12|8|9|4|2|3|2|4	0	0.65
ARRDC5	HNRNPK	5.5	1|12|19|12|1|4|6|2|2	0	0.69
ARRDC5	HNRNPM	17.5	2|7|7|24|11|26|28|9|6	0	0.68
ARRDC5	FUBP3	5.5	0|4|3|6|0|10|16|0|0	0	0.66
ARRDC5	BSG	11	0|2|1|4|0|2|4|3|0	0.82	0.02
ARRDC5	HNRNPD	2.5	0|5|7|4|0|2|2|0|0	0	0.61
ARRDC5	RPL27A	3	2|3|5|3|1|3|5|4|1	0	0.59
ARRDC5	HNRNPF	13	2|13|7|3|9|4|11|13|3	0	0.65
ARRDC5	RPS26	3.5	3|7|6|5|3|4|9|6|1	0	0.64
ARRDC5	RPS27	3.5	5|19|9|17|3|17|28|23|19	0	0.69
ARRDC5	RPS24	2	2|1|3|3|0|3|7|1|2	0	0.69
ARRDC5	RPS25	4.5	3|5|5|10|3|4|6|3|2	0	0.63
ARRDC5	RPS23	1	0|3|2|2|2|2|4|2|0	0	0.55
ARRDC5	RPS20	5	0|5|8|4|0|2|6|3|2	0	0.62
ARRDC5	HNRNPA0	2	0|2|3|2|4|0|1|2|4	0	0.69
ARRDC5	RBM14	7	5|7|4|8|7|9|13|4|8	0	0.65
ARRDC5	RPS28	1	1|2|2|1|2|1|4|0|1	0	0.69
ARRDC5	ENO1	38.5	5|82|94|41|5|6|13|5|0	0	0.69
ARRDC5	H2AFJ	1	0|1|4|1|0|1|1|1|1	0	0.69
ARRDC5	IGF2BP1	9.5	4|8|10|10|4|8|13|9|3	0	0.65
ARRDC5	HIST1H1E	6.5	2|4|5|7|5|4|5|3|3	0	0.58
ARRDC5	IGF2BP3	12	2|7|7|9|3|7|5|4|3	0	0.54
ARRDC5	HNRNPUL1	35	2|22|5|10|3|12|25|31|4	0	0.66
ARRDC5	HIST1H1C	10.5	2|4|5|7|5|4|5|3|3	0.27	0.31
ARRDC5	STAU1	5	2|1|0|8|3|5|14|2|4	0	0.65
ARRDC5	HIST2H2AA3	1	0|1|4|1|0|1|1|1|1	0	0.69
ARRDC5	MYL12B	1	0|1|3|0|0|0|0|0|0	0	0.69
ARRDC5	RPSA	4	2|7|11|7|2|5|8|4|3	0	0.69
ARRDC5	IRS4	107	36|35|21|29|53|39|64|68|45	0	0.67
ARRDC5	RTCB	1.5	0|3|4|7|0|2|4|0|5	0	0.69
ARRDC5	SKIV2L2	2	0|4|3|3|0|3|3|2|1	0	0.69
ARRDC5	ACTN4	13	5|15|45|10|21|0|0|0|10	0	0.68
ARRDC5	RPS4X	11	4|16|13|11|9|10|14|8|11	0	0.66
ARRDC5	SRRM1	5	1|6|5|2|8|3|10|9|6	0	0.65
ARRDC5	BASP1	8.5	0|10|15|8|2|0|5|0|0	0	0.64
ARRDC5	RPL10A	3	2|4|10|2|4|1|4|0|0	0	0.63
ARRDC5	ATP1A1	69	7|10|6|19|4|13|16|7|5	1	0
ARRDC5	HSP90AA1	56	10|49|67|46|10|20|32|15|7	0	0.68
ARRDC5	FBL	8	0|3|5|2|4|4|5|7|5	0	0.48
ARRDC5	RPS13	6.5	2|10|10|7|5|4|11|7|4	0	0.66
ARRDC5	RPS12	2	0|2|3|2|0|2|2|0|0	0	0.49
ARRDC5	TMPO	3	2|10|9|12|5|3|10|5|2	0	0.69
ARRDC5	RPS10	6.5	2|7|11|5|7|4|12|5|3	0	0.66
ARRDC5	RPS17	1	0|2|8|0|0|1|4|2|0	0	0.62
ARRDC5	RPS16	2.5	2|7|12|5|2|4|11|2|2	0	0.69
ARRDC5	RPL23A	6.5	3|7|6|11|3|3|13|2|2	0	0.66
ARRDC5	RPS14	6	6|10|13|7|8|10|15|7|6	0	0.69
ARRDC5	PHB2	9.5	4|14|12|7|3|7|11|7|7	0	0.66
ARRDC5	EEF1A1	43.5	10|62|60|16|38|18|52|50|12	0	0.68
ARRDC5	RPS19	5.5	3|7|8|8|3|4|12|3|3	0	0.65
ARRDC5	RPS18	6	4|13|12|9|4|7|12|7|6	0	0.69
ARRDC5	SF3B1	8	0|0|2|6|0|2|5|4|0	0	0.49
ARRDC5	SF3B3	13.5	0|10|5|5|3|4|2|4|5	0.01	0.46
ARRDC5	SF3B2	10.5	1|4|5|0|1|0|0|5|0	0.21	0.33
ARRDC5	HIST1H1D	6.5	2|4|5|7|5|4|5|3|3	0	0.58
ARRDC5	HSPA1B	117	24|55|59|45|23|45|63|49|35	0	0.67
ARRDC5	HSPA1A	58	12|28|30|23|11|22|32|24|17	0	0.64
ARRDC5	HIST1H2AH	1	0|1|4|1|0|1|1|1|1	0	0.69
ARRDC5	HIST1H2AJ	1	0|1|4|1|0|1|1|1|1	0	0.69
ARRDC5	HIST1H2AD	1	0|1|4|1|0|1|1|1|1	0	0.69
ARRDC5	HIST1H2AG	1	0|1|4|1|0|1|1|1|1	0	0.69
ARRDC5	RPL31	4.5	3|4|4|4|2|3|4|1|0	0	0.53
ARRDC5	HIST1H2AC	2	0|0|10|1|0|1|4|1|1	0	0.61
ARRDC5	HIST1H2AB	2	0|0|10|1|0|1|4|1|1	0	0.61
ARRDC5	YWHAZ	7	0|12|28|10|5|6|9|4|3	0	0.69
ARRDC5	DDX17	8.5	0|10|10|7|0|3|5|3|13	0	0.66
ARRDC5	RPL29	5	2|2|3|4|2|4|3|2|2	0	0.48
ARRDC5	NOP58	3	2|1|6|2|2|1|6|0|0	0	0.59
ARRDC5	NAP1L1	4	3|7|5|3|0|0|3|1|0	0	0.57
ARRDC5	RPL27	5	2|7|9|3|4|2|7|0|2	0	0.64
ARRDC5	YWHAQ	5.5	4|6|15|6|6|4|6|2|2	0	0.65
ARRDC5	RPL21	2	2|5|8|4|5|1|8|0|0	0	0.69
ARRDC5	NOP56	1.5	5|0|0|2|2|2|3|0|0	0	0.55
ARRDC5	RPL23	58	62|65|19|63|55|63|116|72|61	0	0.69
ARRDC5	FAU	2.5	0|3|2|4|2|0|3|1|1	0	0.54
ARRDC5	HSPD1	34.5	16|53|52|29|18|28|35|26|16	0	0.68
ARRDC5	HNRNPA2B1	4.5	1|8|19|8|6|0|4|2|2	0	0.69
ARRDC5	YWHAB	2.5	0|9|22|9|0|0|8|0|0	0	0.69
ARRDC5	CCT6A	7.5	0|8|13|9|0|3|5|0|0	0	0.65
ARRDC5	SLC25A1	1.5	4|6|4|5|6|5|10|10|6	0	0.69
ARRDC5	YWHAE	10.5	0|25|19|12|9|7|11|6|3	0	0.68
ARRDC5	HNRNPA1	3	0|7|15|4|2|0|3|1|3	0	0.69
ARRDC5	PRDX1	7	2|9|22|18|1|3|3|0|0	0	0.67
ARRDC5	YWHAG	4	4|7|14|7|6|4|6|3|2	0	0.69
ARRDC5	MYBBP1A	7	3|6|2|8|5|5|9|2|0	0	0.62
ARRDC5	TARDBP	1	0|4|5|2|0|2|2|1|0	0	0.69
ARRDC5	HIST1H3D	1	0|1|4|1|0|1|1|1|1	0	0.69
ARRDC5	FLNA	20.5	3|44|57|55|16|2|15|0|0	0	0.69
ARRDC5	HIST2H2AC	1	0|1|4|1|0|1|1|1|1	0	0.69
ARRDC5	RPL28	3	0|3|2|3|0|3|3|0|0	0	0.51
ARRDC5	DAZAP1	2	0|0|0|1|0|2|1|0|0	0.08	0.37
ARRDC5	DDX21	12	1|7|7|5|4|1|3|0|0	0.16	0.34
ARRDC5	EIF4E2	5	0|1|1|1|0|3|9|3|4	0	0.58
ARRDC5	RPL38	8	6|19|3|14|7|13|28|14|12	0	0.69
ARRDC5	PPP1CA	3	0|4|0|2|0|2|5|4|2	0	0.58
ARRDC5	RPL36	2	3|0|0|3|4|0|3|0|0	0	0.56
ARRDC5	HNRNPC	8.5	5|2|13|10|15|9|11|2|2	0	0.67
ARRDC5	SRRM2	2.5	7|2|3|8|4|0|0|0|0	0	0.64
ARRDC5	RPA1	7.5	1|0|0|6|2|0|5|0|0	0.02	0.43
ARRDC5	RBMX	4	3|3|3|3|4|1|0|1|2	0	0.5
ARRDC5	NONO	10.5	9|16|9|9|9|13|7|8|5	0	0.66
ARRDC5	SPTAN1	1.5	4|5|27|5|15|0|0|0|0	0	0.69
ARRDC5	NCL	15	4|18|23|21|5|3|7|0|9	0	0.67
ARRDC5	HIST3H2A	2	0|0|10|1|0|1|4|1|1	0	0.61
ARRDC5	RPL24	7.5	4|5|4|12|6|8|11|4|5	0	0.65
ARRDC5	PHB	4.5	0|10|10|4|0|3|3|3|3	0	0.65
ARRDC5	AGO2	4.5	0|3|0|0|0|1|6|5|0	0	0.57
ARRDC5	EWSR1	2	0|2|3|4|0|0|1|0|0	0	0.49
ARRDC5	ILF3	2.5	3|0|8|11|6|8|11|0|3	0	0.69
ARRDC5	ILF2	9.5	0|7|11|10|9|12|11|4|3	0	0.66
ARRDC1	HSPA2	24	0|24|24|26|0|23|31|25|0	0	0.68
ARRDC1	HIST1H4A	4.5	4|2|23|5|8|2|5|1|2	0	0.69
ARRDC1	RPL26	1.5	1|1|2|2|1|1|2|1|0	0	0.47
ARRDC1	ACTG1	34	28|43|81|40|56|14|22|16|41	0	0.69
ARRDC1	HSPA5	55.5	14|35|67|33|20|32|43|25|19	0	0.68
ARRDC1	HSPA8	87.5	39|73|74|72|36|76|95|61|52	0	0.69
ARRDC1	PSPC1	1	0|3|3|2|2|4|0|1|0	0	0.57
ARRDC1	MYL6	1.5	2|4|10|0|3|0|0|0|0	0	0.63
ARRDC1	PRPF8	10	5|10|7|6|8|2|9|13|3	0	0.64
ARRDC1	DHX15	2.5	6|4|9|1|2|3|0|4|2	0	0.63
ARRDC1	EIF3L	2	0|4|7|2|0|0|3|0|0	0	0.61
ARRDC1	ACTG2	3	0|0|0|12|0|5|6|4|12	0	0.66
ARRDC1	CALM1	2.5	1|1|3|0|4|0|0|1|2	0	0.52
ARRDC1	EIF3E	2	0|2|3|3|0|1|3|0|0	0	0.49
ARRDC1	EIF3F	3.5	0|2|2|4|0|0|1|0|0	0.03	0.42
ARRDC1	HSP90AB1	37.5	16|64|99|48|13|22|37|19|11	0	0.69
ARRDC1	HIST1H2BC	3	2|1|8|2|7|1|3|0|0	0	0.63
ARRDC1	MARCKS	3	0|6|9|12|0|1|3|0|0	0	0.65
ARRDC1	ACTC1	16	0|24|47|12|32|5|6|4|12	0	0.68
ARRDC1	WDR61	1	0|0|0|1|0|0|2|0|0	0	0.69
ARRDC1	DHX9	7	3|9|11|5|5|3|11|3|3	0	0.65
ARRDC1	DDX3X	20.5	7|12|12|6|9|8|7|4|24	0	0.65
ARRDC1	CAPZA2	1	2|3|5|3|3|1|0|0|2	0	0.69
ARRDC1	SLC25A1	5.5	4|6|4|5|6|5|10|10|6	0	0.69
ARRDC1	SLC25A6	15.5	12|32|19|18|15|28|43|35|16	0	0.69
ARRDC1	SLC25A5	16	11|31|20|23|16|33|48|36|18	0	0.69
ARRDC1	SLC25A4	12	0|23|14|13|11|20|29|26|11	0	0.69
ARRDC1	FXR2	1.5	0|3|2|3|0|1|4|3|2	0	0.69
ARRDC1	RPL17	3	2|5|5|8|5|5|11|3|2	0	0.69
ARRDC1	RPL10	7	6|5|7|2|12|2|7|2|5	0	0.64
ARRDC1	RPL11	3	2|3|6|3|2|1|1|2|2	0	0.57
ARRDC1	RPL12	4	2|3|4|6|4|6|9|2|2	0	0.64
ARRDC1	RPL13	8	7|9|11|13|7|11|15|4|5	0	0.69
ARRDC1	RPL18	2	2|4|7|5|2|1|0|0|0	0	0.69
ARRDC1	RPL19	1.5	1|5|6|6|1|0|1|0|0	0	0.63
ARRDC1	KRT10	30.5	41|80|299|26|48|134|77|148|100	0	0.69
ARRDC1	SYNCRIP	1	0|0|7|2|0|1|1|1|0	0	0.57
ARRDC1	H2AFV	3.5	4|2|6|0|5|0|3|0|0	0	0.6
ARRDC1	MYL12A	2.5	1|3|5|0|1|0|0|1|1	0	0.52
ARRDC1	RPS6	2	2|11|11|8|2|2|9|2|3	0	0.69
ARRDC1	TUBB4B	99.5	95|213|163|168|94|231|355|216|103	0	0.69
ARRDC1	TUBB4A	74.5	74|158|116|138|72|186|261|160|76	0	0.69
ARRDC1	H2AFZ	1	1|2|6|0|2|0|3|0|0	0	0.69
ARRDC1	VIM	65	62|32|51|53|145|70|65|35|82	0	0.69
ARRDC1	DDX5	7.5	5|8|16|8|4|8|7|7|14	0	0.67
ARRDC1	LIMA1	9	6|0|1|0|17|0|0|0|5	0	0.64
ARRDC1	HNRNPH1	7.5	3|17|14|2|8|4|11|13|6	0	0.67
ARRDC1	ACTB	34	28|43|81|40|56|14|22|16|41	0	0.69
ARRDC1	YBX1	5.5	3|17|16|7|4|11|30|15|6	0	0.69
ARRDC1	EIF4G1	1	0|12|12|7|0|0|1|0|0	0	0.69
ARRDC1	YBX3	2.5	0|12|15|9|4|8|32|9|0	0	0.69
ARRDC1	ACTA2	3	0|0|0|12|0|5|6|4|12	0	0.66
ARRDC1	CAPZB	2.5	2|2|7|3|1|0|0|0|0	0	0.54
ARRDC1	ACTA1	16	0|24|47|12|32|5|6|4|12	0	0.68
ARRDC1	RPS27L	4.5	4|2|0|16|0|16|25|18|2	0	0.69
ARRDC1	RPL6	3	0|9|16|4|0|0|1|0|0	0	0.66
ARRDC1	PABPC1	8.5	0|17|18|16|7|13|22|9|11	0	0.69
ARRDC1	RPL4	4	0|5|14|5|0|0|3|0|0	0	0.65
ARRDC1	RPL5	2.5	0|1|4|1|0|1|3|0|0	0	0.5
ARRDC1	PABPC4	4.5	5|9|9|6|4|8|10|6|5	0	0.69
ARRDC1	GAPDH	6.5	3|33|66|19|3|6|13|13|5	0	0.69
ARRDC1	HELZ	3	8|13|5|16|5|30|45|29|11	0	0.69
ARRDC1	YTHDF2	1.5	0|2|1|1|0|3|6|1|1	0	0.57
ARRDC1	CLTC	9	2|26|38|13|5|2|7|2|0	0	0.68
ARRDC1	XRCC5	2	0|5|6|5|0|2|5|0|0	0	0.62
ARRDC1	KRT9	43.5	34|72|125|41|67|54|22|90|123	0	0.69
ARRDC1	XRCC6	3.5	3|11|21|11|0|6|14|0|0	0	0.69
ARRDC1	RPL7A	2.5	3|11|13|5|2|0|12|1|0	0	0.69
ARRDC1	UBAP2L	1	3|17|7|14|2|13|43|48|13	0	0.69
ARRDC1	CCT2	7	0|19|24|11|0|2|7|0|0	0	0.68
ARRDC1	TUBA1B	94	15|73|0|65|72|102|0|90|7	0	0.69
ARRDC1	KHSRP	1.5	0|18|22|15|0|8|18|6|0	0	0.69
ARRDC1	CCT4	10.5	2|20|18|10|4|3|6|0|0	0	0.67
ARRDC1	JUP	2.5	6|3|50|5|8|5|3|6|9	0	0.69
ARRDC1	PCBP2	5	3|5|12|12|7|8|10|3|3	0	0.69
ARRDC1	TIMM13	2	2|2|2|1|2|1|1|2|0	0.01	0.46
ARRDC1	PCBP1	5	3|8|16|11|5|9|13|5|3	0	0.69
ARRDC1	RPS3A	3.5	0|9|12|10|0|4|10|3|2	0	0.69
ARRDC1	GTF2I	1.5	0|7|3|4|0|0|3|0|0	0	0.61
ARRDC1	RBM39	2	4|3|3|3|2|0|0|3|2	0	0.69
ARRDC1	PKM	6	5|34|48|25|0|6|7|6|2	0	0.69
ARRDC1	RCN2	17.5	5|27|13|13|12|23|37|26|9	0	0.68
ARRDC1	TUBB6	52	38|97|77|65|43|107|160|109|47	0	0.69
ARRDC1	ALYREF	4.5	0|2|4|5|5|2|3|3|2	0	0.57
ARRDC1	PARP1	1.5	0|1|2|5|0|5|5|0|2	0	0.62
ARRDC1	HIST1H2BD	1.5	1|0|4|0|4|0|0|0|0	0	0.55
ARRDC1	SFPQ	5.5	0|7|6|6|6|7|6|5|3	0	0.62
ARRDC1	POLR2C	6.5	0|2|0|3|2|3|5|2|0	0.02	0.43
ARRDC1	POLR2B	13	4|3|3|3|2|7|9|3|0	0.02	0.42
ARRDC1	HIST1H2BL	1.5	1|0|4|0|4|0|0|0|0	0	0.55
ARRDC1	CALM2	2.5	1|1|3|0|4|0|0|1|2	0	0.52
ARRDC1	HIST1H2BN	3	2|1|8|2|7|1|3|0|0	0	0.63
ARRDC1	TUBB2A	18	89|208|146|163|93|231|329|215|48	0	0.69
ARRDC1	HIST1H2BK	1.5	1|0|4|0|4|0|0|0|0	0	0.55
ARRDC1	TUBB	111.5	112|247|169|198|122|272|411|264|122	0	0.69
ARRDC1	FLOT1	6	6|17|4|14|23|19|16|15|31	0	0.69
ARRDC1	SERBP1	1.5	0|4|6|3|0|0|1|0|2	0	0.6
ARRDC1	RPL17-C18orf32	1	0|0|0|2|0|1|2|0|0	0	0.69
ARRDC1	EIF4A1	6	4|32|37|8|1|3|7|4|5	0	0.69
ARRDC1	KRT19	96	54|49|38|169|73|243|268|69|95	0	0.69
ARRDC1	KRT18	47	31|25|11|54|39|96|134|30|58	0	0.69
ARRDC1	MYH10	5	1|11|19|0|5|0|0|0|0	0	0.66
ARRDC1	KRT77	3	0|0|33|0|0|33|19|22|16	0	0.69
ARRDC1	MYH9	3.5	3|17|98|19|4|0|3|0|0	0	0.69
ARRDC1	SF3B4	1	0|2|1|1|0|2|1|2|0	0	0.69
ARRDC1	RPLP2	13	9|18|22|15|9|15|25|12|12	0	0.69
ARRDC1	RPLP1	3	0|3|3|2|0|1|5|2|2	0	0.48
ARRDC1	RPLP0	12.5	8|9|13|10|9|14|17|6|9	0	0.67
ARRDC1	MYO1C	7.5	3|4|7|11|7|18|18|5|10	0	0.69
ARRDC1	PRKDC	8	13|11|13|34|9|36|49|9|6	0	0.69
ARRDC1	KRT2	27.5	38|69|164|21|43|185|73|141|79	0	0.69
ARRDC1	KRT1	49.5	59|82|344|76|87|166|73|154|180	0	0.69
ARRDC1	RPS3	8.5	4|19|24|14|4|9|23|5|5	0	0.69
ARRDC1	RPS2	6	1|7|11|5|3|5|8|3|3	0	0.64
ARRDC1	HIST1H2BM	1.5	1|0|4|0|4|0|0|0|0	0	0.55
ARRDC1	ATP5B	10.5	6|50|67|41|5|9|18|11|4	0	0.69
ARRDC1	VDAC1	2	0|14|19|14|0|10|12|5|3	0	0.69
ARRDC1	KRT8	109.5	74|67|36|232|122|347|461|109|194	0	0.69
ARRDC1	RPS9	5	6|9|10|7|4|6|11|4|4	0	0.69
ARRDC1	RPS8	4	2|7|14|9|3|3|3|1|4	0	0.69
ARRDC1	RPL35	1	1|5|4|4|2|1|4|2|2	0	0.69
ARRDC1	RPL8	3	0|2|9|4|0|1|2|0|2	0	0.61
ARRDC1	HIST1H2BH	1.5	1|0|4|0|4|0|0|0|0	0	0.55
ARRDC1	ATP5A1	14	16|54|51|33|13|37|51|37|15	0	0.69
ARRDC1	H1FX	1	1|0|0|3|1|1|3|0|0	0	0.69
ARRDC1	HNRNPU	4	0|9|18|8|3|1|3|3|9	0	0.69
ARRDC1	C1QBP	6	7|12|8|9|4|2|3|2|4	0	0.65
ARRDC1	HNRNPK	5	1|12|19|12|1|4|6|2|2	0	0.67
ARRDC1	HNRNPM	7	2|7|7|24|11|26|28|9|6	0	0.69
ARRDC1	RBM14	5.5	5|7|4|8|7|9|13|4|8	0	0.69
ARRDC1	HNRNPC	9.5	5|2|13|10|15|9|11|2|2	0	0.66
ARRDC1	HNRNPD	1.5	0|5|7|4|0|2|2|0|0	0	0.62
ARRDC1	HNRNPF	3	2|13|7|3|9|4|11|13|3	0	0.69
ARRDC1	RPS26	2	3|7|6|5|3|4|9|6|1	0	0.69
ARRDC1	RPS27	1.5	5|19|9|17|3|17|28|23|19	0	0.69
ARRDC1	RPS25	3	3|5|5|10|3|4|6|3|2	0	0.69
ARRDC1	RPS20	2	0|5|8|4|0|2|6|3|2	0	0.69
ARRDC1	HNRNPA1	1	0|7|15|4|2|0|3|1|3	0	0.69
ARRDC1	RPS28	1.5	1|2|2|1|2|1|4|0|1	0	0.53
ARRDC1	ENO1	9.5	5|82|94|41|5|6|13|5|0	0	0.69
ARRDC1	PRDX1	3.5	2|9|22|18|1|3|3|0|0	0	0.69
ARRDC1	IGF2BP1	4.5	4|8|10|10|4|8|13|9|3	0	0.69
ARRDC1	HIST1H1E	4	2|4|5|7|5|4|5|3|3	0	0.69
ARRDC1	IGF2BP3	8.5	2|7|7|9|3|7|5|4|3	0	0.62
ARRDC1	HNRNPUL1	2.5	2|22|5|10|3|12|25|31|4	0	0.69
ARRDC1	HIST1H1C	4	2|4|5|7|5|4|5|3|3	0	0.69
ARRDC1	STAU1	6	2|1|0|8|3|5|14|2|4	0	0.65
ARRDC1	MYL12B	1	0|1|3|0|0|0|0|0|0	0	0.69
ARRDC1	RPSA	3	2|7|11|7|2|5|8|4|3	0	0.69
ARRDC1	IRS4	71.5	36|35|21|29|53|39|64|68|45	0	0.68
ARRDC1	RTCB	6	0|3|4|7|0|2|4|0|5	0	0.57
ARRDC1	RPS4X	5	4|16|13|11|9|10|14|8|11	0	0.69
ARRDC1	SRRM1	3	1|6|5|2|8|3|10|9|6	0	0.65
ARRDC1	BASP1	1	0|10|15|8|2|0|5|0|0	0	0.69
ARRDC1	RPL10A	6	2|4|10|2|4|1|4|0|0	0	0.59
ARRDC1	ATP1A1	3.5	7|10|6|19|4|13|16|7|5	0	0.69
ARRDC1	HSP90AA1	31.5	10|49|67|46|10|20|32|15|7	0	0.69
ARRDC1	FBL	10.5	0|3|5|2|4|4|5|7|5	0.01	0.44
ARRDC1	RPS13	1	2|10|10|7|5|4|11|7|4	0	0.69
ARRDC1	RPS11	2.5	2|3|2|3|0|3|5|0|3	0	0.57
ARRDC1	RPS10	4.5	2|7|11|5|7|4|12|5|3	0	0.69
ARRDC1	RPS16	2.5	2|7|12|5|2|4|11|2|2	0	0.69
ARRDC1	RPL23A	3.5	3|7|6|11|3|3|13|2|2	0	0.69
ARRDC1	RPS14	9	6|10|13|7|8|10|15|7|6	0	0.66
ARRDC1	PHB2	4.5	4|14|12|7|3|7|11|7|7	0	0.69
ARRDC1	EEF1A1	13.5	10|62|60|16|38|18|52|50|12	0	0.69
ARRDC1	RPS19	2.5	3|7|8|8|3|4|12|3|3	0	0.69
ARRDC1	RPS18	3.5	4|13|12|9|4|7|12|7|6	0	0.69
ARRDC1	SF3B3	5	0|10|5|5|3|4|2|4|5	0	0.62
ARRDC1	SF3B2	1	1|4|5|0|1|0|0|5|0	0	0.62
ARRDC1	HIST1H1D	4	2|4|5|7|5|4|5|3|3	0	0.69
ARRDC1	HSPA1B	91.5	24|55|59|45|23|45|63|49|35	0	0.68
ARRDC1	HSPA1A	46	12|28|30|23|11|22|32|24|17	0	0.66
ARRDC1	HIST2H2BF	3	2|1|8|2|7|1|3|0|0	0	0.63
ARRDC1	RPL31	2	3|4|4|4|2|3|4|1|0	0	0.69
ARRDC1	SPTBN1	8.5	4|10|7|6|13|0|0|0|1	0	0.63
ARRDC1	YWHAZ	6	0|12|28|10|5|6|9|4|3	0	0.69
ARRDC1	DDX17	2.5	0|10|10|7|0|3|5|3|13	0	0.69
ARRDC1	RPL29	2.5	2|2|3|4|2|4|3|2|2	0	0.57
ARRDC1	NOP58	2	2|1|6|2|2|1|6|0|0	0	0.69
ARRDC1	NAP1L1	2	3|7|5|3|0|0|3|1|0	0	0.69
ARRDC1	RPL27	3.5	2|7|9|3|4|2|7|0|2	0	0.69
ARRDC1	YWHAQ	7.5	4|6|15|6|6|4|6|2|2	0	0.63
ARRDC1	RPL21	3.5	2|5|8|4|5|1|8|0|0	0	0.64
ARRDC1	NOP56	5	5|0|0|2|2|2|3|0|0	0.01	0.45
ARRDC1	RPL23	37	62|65|19|63|55|63|116|72|61	0	0.69
ARRDC1	FAU	1	0|3|2|4|2|0|3|1|1	0	0.69
ARRDC1	HSPD1	33	16|53|52|29|18|28|35|26|16	0	0.69
ARRDC1	HNRNPA2B1	8	1|8|19|8|6|0|4|2|2	0	0.66
ARRDC1	YWHAB	4	0|9|22|9|0|0|8|0|0	0	0.67
ARRDC1	CCT6A	3.5	0|8|13|9|0|3|5|0|0	0	0.66
ARRDC1	YWHAG	7	4|7|14|7|6|4|6|3|2	0	0.64
ARRDC1	YWHAE	10	0|25|19|12|9|7|11|6|3	0	0.68
ARRDC1	ATAD3A	58.5	59|81|45|51|71|88|146|77|71	0	0.69
ARRDC1	MYBBP1A	9	3|6|2|8|5|5|9|2|0	0	0.6
ARRDC1	CFL1	2	0|5|8|5|0|0|1|1|0	0	0.63
ARRDC1	FLNA	9	3|44|57|55|16|2|15|0|0	0	0.69
ARRDC1	RPL28	1	0|3|2|3|0|3|3|0|0	0	0.55
ARRDC1	DDX21	7	1|7|7|5|4|1|3|0|0	0	0.56
ARRDC1	RPL26L1	1	1|0|0|1|1|1|1|0|0	0	0.69
ARRDC1	RPL38	5.5	6|19|3|14|7|13|28|14|12	0	0.69
ARRDC1	ACTN4	3.5	5|15|45|10|21|0|0|0|10	0	0.69
ARRDC1	RPL36	2	3|0|0|3|4|0|3|0|0	0	0.56
ARRDC1	SRRM2	2.5	7|2|3|8|4|0|0|0|0	0	0.63
ARRDC1	RPL32	1.5	3|0|0|3|2|0|1|0|0	0	0.5
ARRDC1	RBMX	2.5	3|3|3|3|4|1|0|1|2	0	0.55
ARRDC1	NONO	10.5	9|16|9|9|9|13|7|8|5	0	0.66
ARRDC1	SPTAN1	11	4|5|27|5|15|0|0|0|0	0	0.66
ARRDC1	NCL	3.5	4|18|23|21|5|3|7|0|9	0	0.69
ARRDC1	RPL24	5.5	4|5|4|12|6|8|11|4|5	0	0.69
ARRDC1	IMMT	2.5	3|8|11|7|0|6|12|6|4	0	0.69
ARRDC1	ILF3	3.5	3|0|8|11|6|8|11|0|3	0	0.69
ARRDC1	ILF2	7	0|7|11|10|9|12|11|4|3	0	0.66
ARRDC2	HSPA2	40	0|24|24|26|0|23|31|25|0	0	0.67
ARRDC2	HIST1H4A	3	4|2|23|5|8|2|5|1|2	0	0.69
ARRDC2	NOP56	5	5|0|0|2|2|2|3|0|0	0.01	0.45
ARRDC2	ACTG1	40	28|43|81|40|56|14|22|16|41	0	0.69
ARRDC2	HSPA5	47	14|35|67|33|20|32|43|25|19	0	0.68
ARRDC2	HSPA8	137.5	39|73|74|72|36|76|95|61|52	0	0.68
ARRDC2	PSPC1	1.5	0|3|3|2|2|4|0|1|0	0	0.55
ARRDC2	SF1	2.5	0|5|1|3|0|6|10|2|3	0	0.69
ARRDC2	MYL6	1.5	2|4|10|0|3|0|0|0|0	0	0.63
ARRDC2	PRPF8	46.5	5|10|7|6|8|2|9|13|3	1	0
ARRDC2	PUF60	4.5	0|3|4|2|0|0|4|3|0	0	0.51
ARRDC2	DHX15	7.5	6|4|9|1|2|3|0|4|2	0	0.56
ARRDC2	FAU	2.5	0|3|2|4|2|0|3|1|1	0	0.54
ARRDC2	EIF3L	3	0|4|7|2|0|0|3|0|0	0	0.59
ARRDC2	CALM1	2.5	1|1|3|0|4|0|0|1|2	0	0.52
ARRDC2	EIF3E	2	0|2|3|3|0|1|3|0|0	0	0.49
ARRDC2	EIF3F	1.5	0|2|2|4|0|0|1|0|0	0	0.53
ARRDC2	GNB2L1	4.5	0|5|9|9|0|9|7|5|6	0	0.69
ARRDC2	HIST1H2BC	1.5	2|1|8|2|7|1|3|0|0	0	0.69
ARRDC2	MARCKS	4.5	0|6|9|12|0|1|3|0|0	0	0.64
ARRDC2	ACTC1	18.5	0|24|47|12|32|5|6|4|12	0	0.68
ARRDC2	EIF4ENIF1	2.5	2|1|0|2|2|3|1|0|4	0	0.52
ARRDC2	PTBP1	2	0|11|16|7|0|2|5|2|0	0	0.69
ARRDC2	WDR61	2.5	0|0|0|1|0|0|2|0|0	0.36	0.3
ARRDC2	DHX9	12	3|9|11|5|5|3|11|3|3	0	0.6
ARRDC2	DDX3X	18	7|12|12|6|9|8|7|4|24	0	0.66
ARRDC2	PRRC2A	7.5	0|2|0|9|0|10|18|0|4	0	0.66
ARRDC2	SLC25A6	43	12|32|19|18|15|28|43|35|16	0	0.67
ARRDC2	SLC25A5	43.5	11|31|20|23|16|33|48|36|18	0	0.68
ARRDC2	SLC25A4	31	0|23|14|13|11|20|29|26|11	0	0.66
ARRDC2	RPL14	1.5	1|2|3|3|1|1|2|1|1	0	0.53
ARRDC2	FXR1	3	0|2|2|3|0|0|3|2|0	0.01	0.46
ARRDC2	FXR2	5.5	0|3|2|3|0|1|4|3|2	0.04	0.4
ARRDC2	RPL17	7.5	2|5|5|8|5|5|11|3|2	0	0.63
ARRDC2	RPL10	4.5	6|5|7|2|12|2|7|2|5	0	0.65
ARRDC2	RPL11	2.5	2|3|6|3|2|1|1|2|2	0	0.58
ARRDC2	RPL12	3	2|3|4|6|4|6|9|2|2	0	0.69
ARRDC2	RPL13	7.5	7|9|11|13|7|11|15|4|5	0	0.69
ARRDC2	RPL18	2.5	2|4|7|5|2|1|0|0|0	0	0.6
ARRDC2	RPL19	1.5	1|5|6|6|1|0|1|0|0	0	0.69
ARRDC2	SYNCRIP	2.5	0|0|7|2|0|1|1|1|0	0	0.54
ARRDC2	MYL12A	1	1|3|5|0|1|0|0|1|1	0	0.69
ARRDC2	SNRPD2	4.5	0|2|2|1|2|0|3|2|0	0.09	0.37
ARRDC2	RPS6	4.5	2|11|11|8|2|2|9|2|3	0	0.66
ARRDC2	LIMA1	1	6|0|1|0|17|0|0|0|5	0	0.69
ARRDC2	TUBB4A	249.5	74|158|116|138|72|186|261|160|76	0	0.69
ARRDC2	KRT1	79.5	59|82|344|76|87|166|73|154|180	0	0.69
ARRDC2	VIM	48.5	62|32|51|53|145|70|65|35|82	0	0.69
ARRDC2	DDX5	14	5|8|16|8|4|8|7|7|14	0	0.65
ARRDC2	DDX6	4	0|8|4|1|0|3|2|5|5	0	0.62
ARRDC2	TUBB4B	340.5	95|213|163|168|94|231|355|216|103	0	0.69
ARRDC2	C14orf166	2	0|5|4|0|0|2|5|0|0	0	0.59
ARRDC2	ACTB	40	28|43|81|40|56|14|22|16|41	0	0.69
ARRDC2	YBX1	30	3|17|16|7|4|11|30|15|6	0	0.66
ARRDC2	EIF4G1	1	0|12|12|7|0|0|1|0|0	0	0.69
ARRDC2	YBX3	17	0|12|15|9|4|8|32|9|0	0	0.67
ARRDC2	CAPZB	2	2|2|7|3|1|0|0|0|0	0	0.56
ARRDC2	ACTA1	18.5	0|24|47|12|32|5|6|4|12	0	0.68
ARRDC2	ELAVL1	1.5	0|3|3|3|0|1|8|1|1	0	0.61
ARRDC2	RPS27L	5.5	4|2|0|16|0|16|25|18|2	0	0.68
ARRDC2	RPL6	1.5	0|9|16|4|0|0|1|0|0	0	0.69
ARRDC2	PABPC1	17	0|17|18|16|7|13|22|9|11	0	0.67
ARRDC2	RPL4	5	0|5|14|5|0|0|3|0|0	0	0.64
ARRDC2	PABPC4	9.5	5|9|9|6|4|8|10|6|5	0	0.63
ARRDC2	GAPDH	16.5	3|33|66|19|3|6|13|13|5	0	0.68
ARRDC2	HELZ	32.5	8|13|5|16|5|30|45|29|11	0	0.68
ARRDC2	YTHDF2	6.5	0|2|1|1|0|3|6|1|1	0.14	0.35
ARRDC2	CLTC	11.5	2|26|38|13|5|2|7|2|0	0	0.68
ARRDC2	XRCC5	2	0|5|6|5|0|2|5|0|0	0	0.61
ARRDC2	KRT9	62	34|72|125|41|67|54|22|90|123	0	0.69
ARRDC2	XRCC6	5.5	3|11|21|11|0|6|14|0|0	0	0.69
ARRDC2	RPL7A	4	3|11|13|5|2|0|12|1|0	0	0.69
ARRDC2	UBAP2L	32	3|17|7|14|2|13|43|48|13	0	0.68
ARRDC2	CCT2	26	0|19|24|11|0|2|7|0|0	0	0.65
ARRDC2	TUBA1B	57.5	15|73|0|65|72|102|0|90|7	0	0.69
ARRDC2	KHSRP	17	0|18|22|15|0|8|18|6|0	0	0.67
ARRDC2	CCT4	20	2|20|18|10|4|3|6|0|0	0	0.66
ARRDC2	JUP	5.5	6|3|50|5|8|5|3|6|9	0	0.69
ARRDC2	PCBP2	12.5	3|5|12|12|7|8|10|3|3	0	0.65
ARRDC2	TIMM13	1	2|2|2|1|2|1|1|2|0	0	0.69
ARRDC2	PCBP1	13.5	3|8|16|11|5|9|13|5|3	0	0.66
ARRDC2	RPS3A	3	0|9|12|10|0|4|10|3|2	0	0.69
ARRDC2	GTF2I	3	0|7|3|4|0|0|3|0|0	0	0.58
ARRDC2	RBM39	5	4|3|3|3|2|0|0|3|2	0.04	0.4
ARRDC2	PKM	12.5	5|34|48|25|0|6|7|6|2	0	0.68
ARRDC2	RCN2	35.5	5|27|13|13|12|23|37|26|9	0	0.67
ARRDC2	TUBB6	155.5	38|97|77|65|43|107|160|109|47	0	0.69
ARRDC2	ALYREF	3	0|2|4|5|5|2|3|3|2	0	0.59
ARRDC2	PARP1	1	0|1|2|5|0|5|5|0|2	0	0.69
ARRDC2	SFPQ	7	0|7|6|6|6|7|6|5|3	0	0.6
ARRDC2	IMMT	10	3|8|11|7|0|6|12|6|4	0	0.64
ARRDC2	POLR2C	6	0|2|0|3|2|3|5|2|0	0.01	0.46
ARRDC2	POLR2B	17	4|3|3|3|2|7|9|3|0	0.46	0.29
ARRDC2	RHOC	1.5	0|0|0|2|0|0|2|0|0	0.03	0.4
ARRDC2	CALM2	2.5	1|1|3|0|4|0|0|1|2	0	0.52
ARRDC2	HIST1H2BN	1.5	2|1|8|2|7|1|3|0|0	0	0.69
ARRDC2	TUBB2A	318.5	89|208|146|163|93|231|329|215|48	0	0.69
ARRDC2	LMNB1	2.5	3|0|7|4|3|4|5|0|0	0	0.62
ARRDC2	MTHFD1	4.5	0|8|9|13|0|6|5|1|0	0	0.66
ARRDC2	TUBB	375	112|247|169|198|122|272|411|264|122	0	0.69
ARRDC2	FLOT1	6	6|17|4|14|23|19|16|15|31	0	0.69
ARRDC2	MYBBP1A	5.5	3|6|2|8|5|5|9|2|0	0	0.63
ARRDC2	RPL17-C18orf32	1.5	0|0|0|2|0|1|2|0|0	0.01	0.44
ARRDC2	EIF4A1	12.5	4|32|37|8|1|3|7|4|5	0	0.68
ARRDC2	HNRNPR	1.5	0|3|3|0|0|0|0|1|0	0.01	0.47
ARRDC2	KRT19	205	54|49|38|169|73|243|268|69|95	0	0.69
ARRDC2	KRT18	64.5	31|25|11|54|39|96|134|30|58	0	0.69
ARRDC2	MYH10	4	1|11|19|0|5|0|0|0|0	0	0.66
ARRDC2	KRT77	8	0|0|33|0|0|33|19|22|16	0	0.68
ARRDC2	MYH9	6	3|17|98|19|4|0|3|0|0	0	0.69
ARRDC2	SF3B4	1.5	0|2|1|1|0|2|1|2|0	0.02	0.43
ARRDC2	RPLP2	14	9|18|22|15|9|15|25|12|12	0	0.69
ARRDC2	RPLP1	2	0|3|3|2|0|1|5|2|2	0	0.54
ARRDC2	RPLP0	8.5	8|9|13|10|9|14|17|6|9	0	0.67
ARRDC2	MYO1C	11	3|4|7|11|7|18|18|5|10	0	0.67
ARRDC2	RPS11	3.5	2|3|2|3|0|3|5|0|3	0	0.54
ARRDC2	RPS15A	2	0|3|5|1|0|1|2|0|0	0	0.56
ARRDC2	PRKDC	93.5	13|11|13|34|9|36|49|9|6	0	0.48
ARRDC2	KRT2	51	38|69|164|21|43|185|73|141|79	0	0.69
ARRDC2	RPS5	2	0|1|3|1|0|1|2|0|0	0.01	0.46
ARRDC2	RPS3	8.5	4|19|24|14|4|9|23|5|5	0	0.69
ARRDC2	RPS2	5	1|7|11|5|3|5|8|3|3	0	0.69
ARRDC2	HNRNPH1	14	3|17|14|2|8|4|11|13|6	0	0.66
ARRDC2	ATP5B	23	6|50|67|41|5|9|18|11|4	0	0.69
ARRDC2	VDAC1	8	0|14|19|14|0|10|12|5|3	0	0.69
ARRDC2	KRT8	305	74|67|36|232|122|347|461|109|194	0	0.69
ARRDC2	RPS9	5.5	6|9|10|7|4|6|11|4|4	0	0.66
ARRDC2	RPS8	3.5	2|7|14|9|3|3|3|1|4	0	0.69
ARRDC2	HSP90AB1	132.5	16|64|99|48|13|22|37|19|11	0	0.68
ARRDC2	RPL35	4	1|5|4|4|2|1|4|2|2	0	0.57
ARRDC2	RPL8	1.5	0|2|9|4|0|1|2|0|2	0	0.69
ARRDC2	ATP5A1	38.5	16|54|51|33|13|37|51|37|15	0	0.69
ARRDC2	H1FX	1	1|0|0|3|1|1|3|0|0	0	0.69
ARRDC2	HNRNPU	5.5	0|9|18|8|3|1|3|3|9	0	0.69
ARRDC2	C1QBP	4.5	7|12|8|9|4|2|3|2|4	0	0.69
ARRDC2	HNRNPK	9.5	1|12|19|12|1|4|6|2|2	0	0.67
ARRDC2	HNRNPM	21.5	2|7|7|24|11|26|28|9|6	0	0.68
ARRDC2	FUBP3	11	0|4|3|6|0|10|16|0|0	0	0.65
ARRDC2	BSG	3.5	0|2|1|4|0|2|4|3|0	0	0.51
ARRDC2	HNRNPD	2.5	0|5|7|4|0|2|2|0|0	0	0.62
ARRDC2	RPL27A	3.5	2|3|5|3|1|3|5|4|1	0	0.59
ARRDC2	HNRNPF	12.5	2|13|7|3|9|4|11|13|3	0	0.64
ARRDC2	RPS26	3	3|7|6|5|3|4|9|6|1	0	0.69
ARRDC2	RPS27	9.5	5|19|9|17|3|17|28|23|19	0	0.69
ARRDC2	RPS24	1	2|1|3|3|0|3|7|1|2	0	0.69
ARRDC2	RPS25	4	3|5|5|10|3|4|6|3|2	0	0.69
ARRDC2	RPS23	1.5	0|3|2|2|2|2|4|2|0	0	0.52
ARRDC2	RPS20	5	0|5|8|4|0|2|6|3|2	0	0.62
ARRDC2	HNRNPA0	2	0|2|3|2|4|0|1|2|4	0	0.69
ARRDC2	RBM14	9	5|7|4|8|7|9|13|4|8	0	0.65
ARRDC2	RPS28	1	1|2|2|1|2|1|4|0|1	0	0.69
ARRDC2	ENO1	22	5|82|94|41|5|6|13|5|0	0	0.69
ARRDC2	PRDX1	5.5	2|9|22|18|1|3|3|0|0	0	0.68
ARRDC2	IGF2BP1	10.5	4|8|10|10|4|8|13|9|3	0	0.65
ARRDC2	HIST1H1E	3.5	2|4|5|7|5|4|5|3|3	0	0.69
ARRDC2	IGF2BP3	14.5	2|7|7|9|3|7|5|4|3	0	0.48
ARRDC2	HNRNPUL1	52	2|22|5|10|3|12|25|31|4	0	0.6
ARRDC2	HIST1H1C	3.5	2|4|5|7|5|4|5|3|3	0	0.69
ARRDC2	STAU1	9	2|1|0|8|3|5|14|2|4	0	0.64
ARRDC2	HNRNPC	10	5|2|13|10|15|9|11|2|2	0	0.66
ARRDC2	RPSA	4	2|7|11|7|2|5|8|4|3	0	0.69
ARRDC2	IRS4	196	36|35|21|29|53|39|64|68|45	1	0
ARRDC2	RTCB	1.5	0|3|4|7|0|2|4|0|5	0	0.69
ARRDC2	SKIV2L2	4	0|4|3|3|0|3|3|2|1	0.01	0.45
ARRDC2	ACTN4	5.5	5|15|45|10|21|0|0|0|10	0	0.69
ARRDC2	RPS4X	9.5	4|16|13|11|9|10|14|8|11	0	0.67
ARRDC2	SRRM1	8	1|6|5|2|8|3|10|9|6	0	0.63
ARRDC2	BASP1	5	0|10|15|8|2|0|5|0|0	0	0.66
ARRDC2	RPL10A	1	2|4|10|2|4|1|4|0|0	0	0.69
ARRDC2	ATP1A1	10.5	7|10|6|19|4|13|16|7|5	0	0.67
ARRDC2	HSP90AA1	118	10|49|67|46|10|20|32|15|7	0	0.66
ARRDC2	FBL	19.5	0|3|5|2|4|4|5|7|5	1	0
ARRDC2	RPS13	5.5	2|10|10|7|5|4|11|7|4	0	0.66
ARRDC2	TMPO	13	2|10|9|12|5|3|10|5|2	0	0.6
ARRDC2	RPS10	7	2|7|11|5|7|4|12|5|3	0	0.65
ARRDC2	RPS17	1	0|2|8|0|0|1|4|2|0	0	0.62
ARRDC2	RPS16	3	2|7|12|5|2|4|11|2|2	0	0.69
ARRDC2	RPL23A	2.5	3|7|6|11|3|3|13|2|2	0	0.69
ARRDC2	RPS14	5	6|10|13|7|8|10|15|7|6	0	0.69
ARRDC2	PHB2	11.5	4|14|12|7|3|7|11|7|7	0	0.66
ARRDC2	EEF1A1	62	10|62|60|16|38|18|52|50|12	0	0.68
ARRDC2	RPS19	2	3|7|8|8|3|4|12|3|3	0	0.69
ARRDC2	RPS18	5.5	4|13|12|9|4|7|12|7|6	0	0.69
ARRDC2	SF3B1	22.5	0|0|2|6|0|2|5|4|0	1	0
ARRDC2	SF3B3	18.5	0|10|5|5|3|4|2|4|5	0.52	0.06
ARRDC2	SF3B2	10.5	1|4|5|0|1|0|0|5|0	0.1	0.36
ARRDC2	HIST1H1D	3.5	2|4|5|7|5|4|5|3|3	0	0.69
ARRDC2	HSPA1B	113.5	24|55|59|45|23|45|63|49|35	0	0.64
ARRDC2	HSPA1A	56.5	12|28|30|23|11|22|32|24|17	0	0.59
ARRDC2	HIST2H2BF	1.5	2|1|8|2|7|1|3|0|0	0	0.69
ARRDC2	LARP4	1	0|0|0|1|0|0|4|0|0	0.02	0.43
ARRDC2	SPTBN1	1.5	4|10|7|6|13|0|0|0|1	0	0.69
ARRDC2	YWHAZ	5.5	0|12|28|10|5|6|9|4|3	0	0.69
ARRDC2	DDX17	10.5	0|10|10|7|0|3|5|3|13	0	0.65
ARRDC2	RPL29	3.5	2|2|3|4|2|4|3|2|2	0	0.54
ARRDC2	NOP58	9.5	2|1|6|2|2|1|6|0|0	0.03	0.41
ARRDC2	NAP1L1	7	3|7|5|3|0|0|3|1|0	0	0.49
ARRDC2	RPL27	3	2|7|9|3|4|2|7|0|2	0	0.69
ARRDC2	YWHAQ	5	4|6|15|6|6|4|6|2|2	0	0.65
ARRDC2	RPL21	2	2|5|8|4|5|1|8|0|0	0	0.69
ARRDC2	RPL23	72	62|65|19|63|55|63|116|72|61	0	0.69
ARRDC2	RPL22	1	1|1|3|3|1|1|2|0|1	0	0.69
ARRDC2	HSPD1	41.5	16|53|52|29|18|28|35|26|16	0	0.68
ARRDC2	HNRNPA2B1	5	1|8|19|8|6|0|4|2|2	0	0.67
ARRDC2	YWHAB	1.5	0|9|22|9|0|0|8|0|0	0	0.69
ARRDC2	G3BP1	1.5	0|3|9|4|0|0|2|0|0	0	0.62
ARRDC2	CCT6A	17	0|8|13|9|0|3|5|0|0	0	0.59
ARRDC2	SLC25A1	8	4|6|4|5|6|5|10|10|6	0	0.64
ARRDC2	YWHAE	10	0|25|19|12|9|7|11|6|3	0	0.68
ARRDC2	PABPN1	1	0|0|0|0|0|0|0|0|0	0	0.69
ARRDC2	HNRNPA1	5	0|7|15|4|2|0|3|1|3	0	0.64
ARRDC2	ATAD3A	118.5	59|81|45|51|71|88|146|77|71	0	0.69
ARRDC2	YWHAG	4	4|7|14|7|6|4|6|3|2	0	0.69
ARRDC2	KRT10	49.5	41|80|299|26|48|134|77|148|100	0	0.69
ARRDC2	TARDBP	2.5	0|4|5|2|0|2|2|1|0	0	0.54
ARRDC2	CFL1	1	0|5|8|5|0|0|1|1|0	0	0.69
ARRDC2	FLNA	21.5	3|44|57|55|16|2|15|0|0	0	0.69
ARRDC2	RPL28	1	0|3|2|3|0|3|3|0|0	0	0.55
ARRDC2	DDX21	6.5	1|7|7|5|4|1|3|0|0	0	0.6
ARRDC2	EIF4E2	4.5	0|1|1|1|0|3|9|3|4	0	0.58
ARRDC2	RPL38	11	6|19|3|14|7|13|28|14|12	0	0.68
ARRDC2	PPP1CA	8	0|4|0|2|0|2|5|4|2	0.02	0.42
ARRDC2	RPL36	2.5	3|0|0|3|4|0|3|0|0	0	0.54
ARRDC2	SRRM2	48.5	7|2|3|8|4|0|0|0|0	1	0
ARRDC2	RPA1	11	1|0|0|6|2|0|5|0|0	0.45	0.29
ARRDC2	RBMX	5	3|3|3|3|4|1|0|1|2	0.01	0.46
ARRDC2	NONO	11	9|16|9|9|9|13|7|8|5	0	0.66
ARRDC2	NCL	7	4|18|23|21|5|3|7|0|9	0	0.68
ARRDC2	RPL24	7.5	4|5|4|12|6|8|11|4|5	0	0.66
ARRDC2	PHB	3	0|10|10|4|0|3|3|3|3	0	0.69
ARRDC2	AGO2	4	0|3|0|0|0|1|6|5|0	0	0.56
ARRDC2	EWSR1	2	0|2|3|4|0|0|1|0|0	0	0.49
ARRDC2	ILF3	5	3|0|8|11|6|8|11|0|3	0	0.69
ARRDC2	ILF2	10.5	0|7|11|10|9|12|11|4|3	0	0.64
ARRDC3	HSPA2	31	0|24|24|26|0|23|31|25|0	0	0.68
ARRDC3	HIST1H4A	1	4|2|23|5|8|2|5|1|2	0	0.69
ARRDC3	NOP56	14	5|0|0|2|2|2|3|0|0	1	0
ARRDC3	ACTG1	25	28|43|81|40|56|14|22|16|41	0	0.69
ARRDC3	HSPA5	51.5	14|35|67|33|20|32|43|25|19	0	0.68
ARRDC3	HSPA8	109.5	39|73|74|72|36|76|95|61|52	0	0.69
ARRDC3	SF1	10	0|5|1|3|0|6|10|2|3	0	0.57
ARRDC3	MYL6	2.5	2|4|10|0|3|0|0|0|0	0	0.63
ARRDC3	PRPF8	45	5|10|7|6|8|2|9|13|3	1	0
ARRDC3	PUF60	3.5	0|3|4|2|0|0|4|3|0	0	0.51
ARRDC3	DHX15	34.5	6|4|9|1|2|3|0|4|2	1	0
ARRDC3	FAU	2	0|3|2|4|2|0|3|1|1	0	0.56
ARRDC3	EIF3L	5	0|4|7|2|0|0|3|0|0	0	0.57
ARRDC3	ACTG2	2.5	0|0|0|12|0|5|6|4|12	0	0.66
ARRDC3	EIF3E	5	0|2|3|3|0|1|3|0|0	0.03	0.41
ARRDC3	EIF3F	3.5	0|2|2|4|0|0|1|0|0	0.01	0.46
ARRDC3	GNB2L1	7	0|5|9|9|0|9|7|5|6	0	0.65
ARRDC3	HIST1H2BC	1.5	2|1|8|2|7|1|3|0|0	0	0.69
ARRDC3	ACTC1	8.5	0|24|47|12|32|5|6|4|12	0	0.69
ARRDC3	EIF4ENIF1	5.5	2|1|0|2|2|3|1|0|4	0.04	0.4
ARRDC3	PTBP1	6.5	0|11|16|7|0|2|5|2|0	0	0.66
ARRDC3	WDR61	4.5	0|0|0|1|0|0|2|0|0	0.84	0.02
ARRDC3	DHX9	21	3|9|11|5|5|3|11|3|3	0	0.52
ARRDC3	DDX3X	95.5	7|12|12|6|9|8|7|4|24	1	0
ARRDC3	ATXN2L	3	0|3|2|0|0|3|1|0|5	0	0.56
ARRDC3	PRRC2A	4.5	0|2|0|9|0|10|18|0|4	0	0.67
ARRDC3	SLC25A6	50	12|32|19|18|15|28|43|35|16	0	0.68
ARRDC3	SLC25A5	50.5	11|31|20|23|16|33|48|36|18	0	0.68
ARRDC3	SLC25A4	20.5	0|23|14|13|11|20|29|26|11	0	0.67
ARRDC3	RPL14	1.5	1|2|3|3|1|1|2|1|1	0	0.53
ARRDC3	FXR1	1.5	0|2|2|3|0|0|3|2|0	0	0.53
ARRDC3	FXR2	2	0|3|2|3|0|1|4|3|2	0	0.69
ARRDC3	RPL17	4.5	2|5|5|8|5|5|11|3|2	0	0.64
ARRDC3	RPL10	2.5	6|5|7|2|12|2|7|2|5	0	0.69
ARRDC3	RPL11	3	2|3|6|3|2|1|1|2|2	0	0.57
ARRDC3	RPL12	2.5	2|3|4|6|4|6|9|2|2	0	0.69
ARRDC3	RPL13	12	7|9|11|13|7|11|15|4|5	0	0.66
ARRDC3	RPL18	1.5	2|4|7|5|2|1|0|0|0	0	0.69
ARRDC3	RPL19	3	1|5|6|6|1|0|1|0|0	0	0.63
ARRDC3	SYNCRIP	3.5	0|0|7|2|0|1|1|1|0	0	0.5
ARRDC3	SNRPD2	3	0|2|2|1|2|0|3|2|0	0.01	0.45
ARRDC3	RPS6	6.5	2|11|11|8|2|2|9|2|3	0	0.66
ARRDC3	TUBB4B	295	95|213|163|168|94|231|355|216|103	0	0.69
ARRDC3	TUBB4A	212.5	74|158|116|138|72|186|261|160|76	0	0.69
ARRDC3	VIM	23.5	62|32|51|53|145|70|65|35|82	0	0.69
ARRDC3	DDX5	64	5|8|16|8|4|8|7|7|14	1	0
ARRDC3	DDX6	4	0|8|4|1|0|3|2|5|5	0	0.62
ARRDC3	PHB	2.5	0|10|10|4|0|3|3|3|3	0	0.69
ARRDC3	C14orf166	2.5	0|5|4|0|0|2|5|0|0	0	0.61
ARRDC3	ACTB	25	28|43|81|40|56|14|22|16|41	0	0.69
ARRDC3	YBX1	27	3|17|16|7|4|11|30|15|6	0	0.66
ARRDC3	YBX3	29	0|12|15|9|4|8|32|9|0	0	0.65
ARRDC3	ACTA2	2.5	0|0|0|12|0|5|6|4|12	0	0.66
ARRDC3	CAPZB	2	2|2|7|3|1|0|0|0|0	0	0.58
ARRDC3	ACTA1	8.5	0|24|47|12|32|5|6|4|12	0	0.69
ARRDC3	ELAVL1	4	0|3|3|3|0|1|8|1|1	0	0.57
ARRDC3	RPL8	3.5	0|2|9|4|0|1|2|0|2	0	0.6
ARRDC3	RPL9	2.5	0|2|4|2|0|2|4|0|1	0	0.54
ARRDC3	RPL6	1	0|9|16|4|0|0|1|0|0	0	0.69
ARRDC3	PABPC1	14	0|17|18|16|7|13|22|9|11	0	0.68
ARRDC3	RPL4	2.5	0|5|14|5|0|0|3|0|0	0	0.69
ARRDC3	RPL5	4	0|1|4|1|0|1|3|0|0	0.01	0.44
ARRDC3	PABPC4	8.5	5|9|9|6|4|8|10|6|5	0	0.64
ARRDC3	GAPDH	20.5	3|33|66|19|3|6|13|13|5	0	0.69
ARRDC3	HELZ	15.5	8|13|5|16|5|30|45|29|11	0	0.69
ARRDC3	YTHDF2	2	0|2|1|1|0|3|6|1|1	0	0.54
ARRDC3	CLTC	4	2|26|38|13|5|2|7|2|0	0	0.69
ARRDC3	KRT9	57	34|72|125|41|67|54|22|90|123	0	0.69
ARRDC3	RPL7A	4.5	3|11|13|5|2|0|12|1|0	0	0.69
ARRDC3	UBAP2L	23	3|17|7|14|2|13|43|48|13	0	0.68
ARRDC3	CCT2	19.5	0|19|24|11|0|2|7|0|0	0	0.67
ARRDC3	TUBA1B	140	15|73|0|65|72|102|0|90|7	0	0.69
ARRDC3	KHSRP	8.5	0|18|22|15|0|8|18|6|0	0	0.69
ARRDC3	CCT4	11.5	2|20|18|10|4|3|6|0|0	0	0.67
ARRDC3	JUP	11	6|3|50|5|8|5|3|6|9	0	0.68
ARRDC3	PCBP2	19	3|5|12|12|7|8|10|3|3	0	0.59
ARRDC3	TIMM13	1.5	2|2|2|1|2|1|1|2|0	0	0.47
ARRDC3	PCBP1	14	3|8|16|11|5|9|13|5|3	0	0.66
ARRDC3	RPS3A	3	0|9|12|10|0|4|10|3|2	0	0.69
ARRDC3	GTF2I	1.5	0|7|3|4|0|0|3|0|0	0	0.62
ARRDC3	RBM39	11	4|3|3|3|2|0|0|3|2	0.76	0.02
ARRDC3	PKM	9.5	5|34|48|25|0|6|7|6|2	0	0.69
ARRDC3	RCN2	15	5|27|13|13|12|23|37|26|9	0	0.69
ARRDC3	TUBB6	142.5	38|97|77|65|43|107|160|109|47	0	0.69
ARRDC3	ALYREF	7	0|2|4|5|5|2|3|3|2	0	0.51
ARRDC3	RPL35	2	1|5|4|4|2|1|4|2|2	0	0.69
ARRDC3	HIST1H2BD	1	1|0|4|0|4|0|0|0|0	0	0.69
ARRDC3	SFPQ	1.5	0|7|6|6|6|7|6|5|3	0	0.69
ARRDC3	IMMT	5	3|8|11|7|0|6|12|6|4	0	0.69
ARRDC3	POLR2C	8.5	0|2|0|3|2|3|5|2|0	0.18	0.33
ARRDC3	POLR2B	23.5	4|3|3|3|2|7|9|3|0	1	0
ARRDC3	HIST1H2BL	1	1|0|4|0|4|0|0|0|0	0	0.69
ARRDC3	HIST1H2BM	1	1|0|4|0|4|0|0|0|0	0	0.69
ARRDC3	HIST1H2BN	1.5	2|1|8|2|7|1|3|0|0	0	0.69
ARRDC3	TUBB2A	284.5	89|208|146|163|93|231|329|215|48	0	0.69
ARRDC3	HIST1H2BK	1	1|0|4|0|4|0|0|0|0	0	0.69
ARRDC3	MTHFD1	10.5	0|8|9|13|0|6|5|1|0	0	0.64
ARRDC3	TUBB	348.5	112|247|169|198|122|272|411|264|122	0	0.69
ARRDC3	RHOC	1	0|0|0|2|0|0|2|0|0	0	0.69
ARRDC3	MYBBP1A	20	3|6|2|8|5|5|9|2|0	0.5	0.07
ARRDC3	RPL17-C18orf32	1	0|0|0|2|0|1|2|0|0	0	0.69
ARRDC3	EIF4A1	14.5	4|32|37|8|1|3|7|4|5	0	0.68
ARRDC3	HNRNPR	3.5	0|3|3|0|0|0|0|1|0	0.03	0.42
ARRDC3	KRT19	45.5	54|49|38|169|73|243|268|69|95	0	0.69
ARRDC3	KRT18	17.5	31|25|11|54|39|96|134|30|58	0	0.69
ARRDC3	SF3B4	3.5	0|2|1|1|0|2|1|2|0	0.08	0.37
ARRDC3	RPLP2	15	9|18|22|15|9|15|25|12|12	0	0.69
ARRDC3	RPLP1	3	0|3|3|2|0|1|5|2|2	0	0.56
ARRDC3	RPLP0	12.5	8|9|13|10|9|14|17|6|9	0	0.67
ARRDC3	MYO1C	13.5	3|4|7|11|7|18|18|5|10	0	0.67
ARRDC3	RPS11	2	2|3|2|3|0|3|5|0|3	0	0.69
ARRDC3	RPS15A	2	0|3|5|1|0|1|2|0|0	0	0.56
ARRDC3	PRKDC	46	13|11|13|34|9|36|49|9|6	0	0.68
ARRDC3	RPS7	4.5	0|4|10|2|0|0|2|2|2	0	0.59
ARRDC3	KRT2	51.5	38|69|164|21|43|185|73|141|79	0	0.69
ARRDC3	KRT1	70.5	59|82|344|76|87|166|73|154|180	0	0.69
ARRDC3	RPS3	13.5	4|19|24|14|4|9|23|5|5	0	0.68
ARRDC3	RPS2	4.5	1|7|11|5|3|5|8|3|3	0	0.69
ARRDC3	HNRNPH1	21.5	3|17|14|2|8|4|11|13|6	0	0.62
ARRDC3	ATP5B	26	6|50|67|41|5|9|18|11|4	0	0.69
ARRDC3	VDAC1	3.5	0|14|19|14|0|10|12|5|3	0	0.69
ARRDC3	KRT8	46.5	74|67|36|232|122|347|461|109|194	0	0.69
ARRDC3	RPS9	3.5	6|9|10|7|4|6|11|4|4	0	0.69
ARRDC3	RPS8	5	2|7|14|9|3|3|3|1|4	0	0.66
ARRDC3	HSP90AB1	72	16|64|99|48|13|22|37|19|11	0	0.69
ARRDC3	HIST1H2BH	1	1|0|4|0|4|0|0|0|0	0	0.69
ARRDC3	ATP5A1	43.5	16|54|51|33|13|37|51|37|15	0	0.69
ARRDC3	H1FX	1.5	1|0|0|3|1|1|3|0|0	0	0.51
ARRDC3	HNRNPU	14	0|9|18|8|3|1|3|3|9	0	0.64
ARRDC3	C1QBP	18.5	7|12|8|9|4|2|3|2|4	0.01	0.45
ARRDC3	HNRNPK	13	1|12|19|12|1|4|6|2|2	0	0.66
ARRDC3	HNRNPM	14	2|7|7|24|11|26|28|9|6	0	0.68
ARRDC3	RBM14	22.5	5|7|4|8|7|9|13|4|8	0.12	0.35
ARRDC3	BSG	1.5	0|2|1|4|0|2|4|3|0	0	0.57
ARRDC3	HNRNPD	2	0|5|7|4|0|2|2|0|0	0	0.69
ARRDC3	RPL27A	3	2|3|5|3|1|3|5|4|1	0	0.69
ARRDC3	HNRNPF	22.5	2|13|7|3|9|4|11|13|3	0	0.58
ARRDC3	RPS26	3.5	3|7|6|5|3|4|9|6|1	0	0.69
ARRDC3	RPS27	1	5|19|9|17|3|17|28|23|19	0	0.69
ARRDC3	RPS24	2.5	2|1|3|3|0|3|7|1|2	0	0.6
ARRDC3	RPS25	3	3|5|5|10|3|4|6|3|2	0	0.69
ARRDC3	RPS20	2	0|5|8|4|0|2|6|3|2	0	0.69
ARRDC3	HNRNPA0	1.5	0|2|3|2|4|0|1|2|4	0	0.69
ARRDC3	HNRNPA1	9	0|7|15|4|2|0|3|1|3	0	0.63
ARRDC3	RPS28	2	1|2|2|1|2|1|4|0|1	0	0.5
ARRDC3	ENO1	10.5	5|82|94|41|5|6|13|5|0	0	0.69
ARRDC3	IGF2BP1	11.5	4|8|10|10|4|8|13|9|3	0	0.64
ARRDC3	HIST1H1E	2.5	2|4|5|7|5|4|5|3|3	0	0.69
ARRDC3	IGF2BP3	15	2|7|7|9|3|7|5|4|3	0.01	0.45
ARRDC3	HNRNPUL1	16	2|22|5|10|3|12|25|31|4	0	0.68
ARRDC3	HIST1H1C	2.5	2|4|5|7|5|4|5|3|3	0	0.69
ARRDC3	STAU1	11	2|1|0|8|3|5|14|2|4	0	0.61
ARRDC3	HNRNPC	11	5|2|13|10|15|9|11|2|2	0	0.66
ARRDC3	RPSA	4.5	2|7|11|7|2|5|8|4|3	0	0.69
ARRDC3	IRS4	121	36|35|21|29|53|39|64|68|45	0	0.67
ARRDC3	RTCB	5.5	0|3|4|7|0|2|4|0|5	0	0.58
ARRDC3	SKIV2L2	31.5	0|4|3|3|0|3|3|2|1	1	0
ARRDC3	RPS4X	10.5	4|16|13|11|9|10|14|8|11	0	0.67
ARRDC3	BASP1	2.5	0|10|15|8|2|0|5|0|0	0	0.69
ARRDC3	RPL10A	5	2|4|10|2|4|1|4|0|0	0	0.61
ARRDC3	ATP1A1	3	7|10|6|19|4|13|16|7|5	0	0.69
ARRDC3	HSP90AA1	58.5	10|49|67|46|10|20|32|15|7	0	0.68
ARRDC3	FBL	16.5	0|3|5|2|4|4|5|7|5	0.76	0.02
ARRDC3	RPS13	5	2|10|10|7|5|4|11|7|4	0	0.69
ARRDC3	TMPO	5.5	2|10|9|12|5|3|10|5|2	0	0.69
ARRDC3	RPS10	6	2|7|11|5|7|4|12|5|3	0	0.69
ARRDC3	RPS17	1	0|2|8|0|0|1|4|2|0	0	0.62
ARRDC3	RPS16	6.5	2|7|12|5|2|4|11|2|2	0	0.66
ARRDC3	RPL23A	1.5	3|7|6|11|3|3|13|2|2	0	0.69
ARRDC3	RPS14	4	6|10|13|7|8|10|15|7|6	0	0.69
ARRDC3	PHB2	6.5	4|14|12|7|3|7|11|7|7	0	0.69
ARRDC3	EEF1A1	81.5	10|62|60|16|38|18|52|50|12	0	0.68
ARRDC3	RPS19	2.5	3|7|8|8|3|4|12|3|3	0	0.69
ARRDC3	RPS18	5.5	4|13|12|9|4|7|12|7|6	0	0.69
ARRDC3	SF3B1	37.5	0|0|2|6|0|2|5|4|0	1	0
ARRDC3	SF3B3	26.5	0|10|5|5|3|4|2|4|5	1	0
ARRDC3	SF3B2	33.5	1|4|5|0|1|0|0|5|0	1	0
ARRDC3	HIST1H1D	2.5	2|4|5|7|5|4|5|3|3	0	0.69
ARRDC3	HSPA1B	96	24|55|59|45|23|45|63|49|35	0	0.68
ARRDC3	HSPA1A	48	12|28|30|23|11|22|32|24|17	0	0.67
ARRDC3	HIST2H2BF	1.5	2|1|8|2|7|1|3|0|0	0	0.69
ARRDC3	LARP4	1	0|0|0|1|0|0|4|0|0	0.02	0.43
ARRDC3	RPL31	1	3|4|4|4|2|3|4|1|0	0	0.69
ARRDC3	YWHAZ	5.5	0|12|28|10|5|6|9|4|3	0	0.69
ARRDC3	DDX17	38.5	0|10|10|7|0|3|5|3|13	1	0
ARRDC3	RPL29	2	2|2|3|4|2|4|3|2|2	0	0.57
ARRDC3	NOP58	13	2|1|6|2|2|1|6|0|0	0.76	0.02
ARRDC3	NAP1L1	9.5	3|7|5|3|0|0|3|1|0	0.03	0.41
ARRDC3	RPL27	3.5	2|7|9|3|4|2|7|0|2	0	0.69
ARRDC3	YWHAQ	5.5	4|6|15|6|6|4|6|2|2	0	0.65
ARRDC3	RPL21	6	2|5|8|4|5|1|8|0|0	0	0.63
ARRDC3	RPL23	49.5	62|65|19|63|55|63|116|72|61	0	0.69
ARRDC3	RPL22	2	1|1|3|3|1|1|2|0|1	0	0.52
ARRDC3	HSPD1	69.5	16|53|52|29|18|28|35|26|16	0	0.68
ARRDC3	HNRNPA2B1	11	1|8|19|8|6|0|4|2|2	0	0.65
ARRDC3	YWHAB	7	0|9|22|9|0|0|8|0|0	0	0.67
ARRDC3	G3BP1	3	0|3|9|4|0|0|2|0|0	0	0.62
ARRDC3	CCT6A	8.5	0|8|13|9|0|3|5|0|0	0	0.65
ARRDC3	YWHAG	3	4|7|14|7|6|4|6|3|2	0	0.65
ARRDC3	YWHAE	8.5	0|25|19|12|9|7|11|6|3	0	0.69
ARRDC3	PABPN1	2	0|0|0|0|0|0|0|0|0	0.5	0.12
ARRDC3	ATAD3A	86.5	59|81|45|51|71|88|146|77|71	0	0.69
ARRDC3	KRT10	63.5	41|80|299|26|48|134|77|148|100	0	0.69
ARRDC3	TARDBP	3.5	0|4|5|2|0|2|2|1|0	0	0.51
ARRDC3	FLNA	11	3|44|57|55|16|2|15|0|0	0	0.69
ARRDC3	DDX21	14	1|7|7|5|4|1|3|0|0	0.17	0.34
ARRDC3	EIF4E2	9	0|1|1|1|0|3|9|3|4	0	0.49
ARRDC3	RPL38	10.5	6|19|3|14|7|13|28|14|12	0	0.69
ARRDC3	PPP1CA	4.5	0|4|0|2|0|2|5|4|2	0	0.56
ARRDC3	SRRM1	20.5	1|6|5|2|8|3|10|9|6	0.35	0.3
ARRDC3	SRRM2	35.5	7|2|3|8|4|0|0|0|0	1	0
ARRDC3	RPA1	1	1|0|0|6|2|0|5|0|0	0	0.69
ARRDC3	RBMX	9.5	3|3|3|3|4|1|0|1|2	0.58	0.04
ARRDC3	NONO	7	9|16|9|9|9|13|7|8|5	0	0.69
ARRDC3	NCL	12	4|18|23|21|5|3|7|0|9	0	0.68
ARRDC3	RPL24	6	4|5|4|12|6|8|11|4|5	0	0.66
ARRDC3	EWSR1	1.5	0|2|3|4|0|0|1|0|0	0	0.55
ARRDC3	ILF3	5	3|0|8|11|6|8|11|0|3	0	0.69
ARRDC3	ILF2	9.5	0|7|11|10|9|12|11|4|3	0	0.65
TXNIP	HSPA2	55	0|24|24|26|0|23|31|25|0	0	0.61
TXNIP	HIST1H4A	4	4|2|23|5|8|2|5|1|2	0	0.67
TXNIP	RPL26	1	1|1|2|2|1|1|2|1|0	0	0.69
TXNIP	ACTG1	88	28|43|81|40|56|14|22|16|41	0	0.68
TXNIP	HSPA5	78.5	14|35|67|33|20|32|43|25|19	0	0.68
TXNIP	HSPA8	201	39|73|74|72|36|76|95|61|52	0	0.64
TXNIP	PSPC1	4.5	0|3|3|2|2|4|0|1|0	0	0.48
TXNIP	SF1	4.5	0|5|1|3|0|6|10|2|3	0	0.64
TXNIP	MYL6	3.5	2|4|10|0|3|0|0|0|0	0	0.62
TXNIP	PRPF8	55	5|10|7|6|8|2|9|13|3	1	0
TXNIP	PUF60	4	0|3|4|2|0|0|4|3|0	0	0.51
TXNIP	DHX15	9	6|4|9|1|2|3|0|4|2	0	0.53
TXNIP	FAU	2.5	0|3|2|4|2|0|3|1|1	0	0.54
TXNIP	EIF3L	2	0|4|7|2|0|0|3|0|0	0	0.61
TXNIP	CALM1	4	1|1|3|0|4|0|0|1|2	0.01	0.45
TXNIP	EIF3E	3	0|2|3|3|0|1|3|0|0	0	0.49
TXNIP	EIF3F	2	0|2|2|4|0|0|1|0|0	0	0.52
TXNIP	GNB2L1	7	0|5|9|9|0|9|7|5|6	0	0.63
TXNIP	HIST1H2BC	8.5	2|1|8|2|7|1|3|0|0	0.17	0.34
TXNIP	MARCKS	6.5	0|6|9|12|0|1|3|0|0	0	0.64
TXNIP	ACTC1	47	0|24|47|12|32|5|6|4|12	0	0.67
TXNIP	PTBP1	15	0|11|16|7|0|2|5|2|0	0	0.61
TXNIP	WDR61	5	0|0|0|1|0|0|2|0|0	0.75	0.02
TXNIP	DHX9	14.5	3|9|11|5|5|3|11|3|3	0	0.58
TXNIP	DDX3X	13	7|12|12|6|9|8|7|4|24	0	0.67
TXNIP	ATXN2L	2	0|3|2|0|0|3|1|0|5	0	0.58
TXNIP	PRRC2A	3	0|2|0|9|0|10|18|0|4	0	0.69
TXNIP	SLC25A6	51	12|32|19|18|15|28|43|35|16	0	0.67
TXNIP	SLC25A5	53	11|31|20|23|16|33|48|36|18	0	0.67
TXNIP	SLC25A4	39	0|23|14|13|11|20|29|26|11	0	0.64
TXNIP	RPL14	1.5	1|2|3|3|1|1|2|1|1	0	0.53
TXNIP	FXR1	1.5	0|2|2|3|0|0|3|2|0	0	0.53
TXNIP	FXR2	2.5	0|3|2|3|0|1|4|3|2	0	0.52
TXNIP	RPL17	4.5	2|5|5|8|5|5|11|3|2	0	0.69
TXNIP	RPL10	5.5	6|5|7|2|12|2|7|2|5	0	0.65
TXNIP	RPL11	3	2|3|6|3|2|1|1|2|2	0	0.57
TXNIP	RPL12	2	2|3|4|6|4|6|9|2|2	0	0.69
TXNIP	RPL13	10.5	7|9|11|13|7|11|15|4|5	0	0.66
TXNIP	RPL18	3.5	2|4|7|5|2|1|0|0|0	0	0.6
TXNIP	RPL19	1.5	1|5|6|6|1|0|1|0|0	0	0.69
TXNIP	KRT10	33	41|80|299|26|48|134|77|148|100	0	0.69
TXNIP	SYNCRIP	3.5	0|0|7|2|0|1|1|1|0	0	0.5
TXNIP	H2AFV	5	4|2|6|0|5|0|3|0|0	0	0.55
TXNIP	MYL12A	2	1|3|5|0|1|0|0|1|1	0	0.52
TXNIP	SNRPD2	5	0|2|2|1|2|0|3|2|0	0.35	0.3
TXNIP	RPS6	4.5	2|11|11|8|2|2|9|2|3	0	0.69
TXNIP	TUBB4B	351.5	95|213|163|168|94|231|355|216|103	0	0.69
TXNIP	TUBB4A	255.5	74|158|116|138|72|186|261|160|76	0	0.69
TXNIP	KRT1	50.5	59|82|344|76|87|166|73|154|180	0	0.69
TXNIP	H2AFZ	5	1|2|6|0|2|0|3|0|0	0.01	0.44
TXNIP	VIM	183.5	62|32|51|53|145|70|65|35|82	0	0.67
TXNIP	DDX5	11.5	5|8|16|8|4|8|7|7|14	0	0.66
TXNIP	DDX6	5	0|8|4|1|0|3|2|5|5	0	0.61
TXNIP	LIMA1	12.5	6|0|1|0|17|0|0|0|5	0	0.55
TXNIP	C14orf166	2	0|5|4|0|0|2|5|0|0	0	0.59
TXNIP	ACTB	88	28|43|81|40|56|14|22|16|41	0	0.68
TXNIP	YBX1	28	3|17|16|7|4|11|30|15|6	0	0.66
TXNIP	EIF4G1	6	0|12|12|7|0|0|1|0|0	0	0.65
TXNIP	YBX3	29	0|12|15|9|4|8|32|9|0	0	0.64
TXNIP	CAPZB	1.5	2|2|7|3|1|0|0|0|0	0	0.58
TXNIP	ACTA1	47	0|24|47|12|32|5|6|4|12	0	0.67
TXNIP	ELAVL1	3	0|3|3|3|0|1|8|1|1	0	0.59
TXNIP	RPS27L	4	4|2|0|16|0|16|25|18|2	0	0.69
TXNIP	RPL9	1.5	0|2|4|2|0|2|4|0|1	0	0.55
TXNIP	RPL6	5	0|9|16|4|0|0|1|0|0	0	0.65
TXNIP	PABPC1	15	0|17|18|16|7|13|22|9|11	0	0.67
TXNIP	RPL4	7	0|5|14|5|0|0|3|0|0	0	0.61
TXNIP	RPL5	2.5	0|1|4|1|0|1|3|0|0	0	0.5
TXNIP	PABPC4	8.5	5|9|9|6|4|8|10|6|5	0	0.64
TXNIP	GAPDH	37	3|33|66|19|3|6|13|13|5	0	0.68
TXNIP	HELZ	13.5	8|13|5|16|5|30|45|29|11	0	0.69
TXNIP	YTHDF2	5	0|2|1|1|0|3|6|1|1	0.05	0.39
TXNIP	CLTC	24.5	2|26|38|13|5|2|7|2|0	0	0.67
TXNIP	XRCC5	8	0|5|6|5|0|2|5|0|0	0.25	0.32
TXNIP	KRT9	38	34|72|125|41|67|54|22|90|123	0	0.69
TXNIP	XRCC6	10.5	3|11|21|11|0|6|14|0|0	0	0.66
TXNIP	RPL7A	7.5	3|11|13|5|2|0|12|1|0	0	0.66
TXNIP	ATAD3A	93.5	59|81|45|51|71|88|146|77|71	0	0.69
TXNIP	UBAP2L	16	3|17|7|14|2|13|43|48|13	0	0.68
TXNIP	CCT2	22	0|19|24|11|0|2|7|0|0	0	0.65
TXNIP	TUBA1B	64.5	15|73|0|65|72|102|0|90|7	0	0.69
TXNIP	KHSRP	24.5	0|18|22|15|0|8|18|6|0	0	0.66
TXNIP	CCT4	18	2|20|18|10|4|3|6|0|0	0	0.66
TXNIP	JUP	6.5	6|3|50|5|8|5|3|6|9	0	0.69
TXNIP	PCBP2	21.5	3|5|12|12|7|8|10|3|3	0.21	0.33
TXNIP	TIMM13	1.5	2|2|2|1|2|1|1|2|0	0	0.47
TXNIP	PCBP1	15	3|8|16|11|5|9|13|5|3	0	0.65
TXNIP	HIST1H2AH	1	0|1|4|1|0|1|1|1|1	0	0.47
TXNIP	RPS3A	8	0|9|12|10|0|4|10|3|2	0	0.65
TXNIP	GTF2I	5	0|7|3|4|0|0|3|0|0	0	0.53
TXNIP	RBM39	3.5	4|3|3|3|2|0|0|3|2	0	0.49
TXNIP	PKM	28.5	5|34|48|25|0|6|7|6|2	0	0.68
TXNIP	RCN2	41.5	5|27|13|13|12|23|37|26|9	0	0.67
TXNIP	TUBB6	158	38|97|77|65|43|107|160|109|47	0	0.69
TXNIP	ALYREF	11	0|2|4|5|5|2|3|3|2	0.5	0.08
TXNIP	PARP1	5.5	0|1|2|5|0|5|5|0|2	0	0.55
TXNIP	HIST1H2BD	4	1|0|4|0|4|0|0|0|0	0.1	0.36
TXNIP	SFPQ	6	0|7|6|6|6|7|6|5|3	0	0.62
TXNIP	IMMT	11	3|8|11|7|0|6|12|6|4	0	0.64
TXNIP	POLR2C	11	0|2|0|3|2|3|5|2|0	0.75	0.02
TXNIP	POLR2B	23.5	4|3|3|3|2|7|9|3|0	0.84	0.02
TXNIP	HIST1H2BL	4	1|0|4|0|4|0|0|0|0	0.1	0.36
TXNIP	CALM2	4	1|1|3|0|4|0|0|1|2	0.01	0.45
TXNIP	HIST1H2BN	8.5	2|1|8|2|7|1|3|0|0	0.17	0.34
TXNIP	TUBB2A	330	89|208|146|163|93|231|329|215|48	0	0.69
TXNIP	HIST1H2BK	4	1|0|4|0|4|0|0|0|0	0.1	0.36
TXNIP	LMNB1	2	3|0|7|4|3|4|5|0|0	0	0.61
TXNIP	MTHFD1	6.5	0|8|9|13|0|6|5|1|0	0	0.65
TXNIP	TUBB	400.5	112|247|169|198|122|272|411|264|122	0	0.69
TXNIP	FLOT1	8.5	6|17|4|14|23|19|16|15|31	0	0.69
TXNIP	SPTBN1	20.5	4|10|7|6|13|0|0|0|1	0.49	0.18
TXNIP	SERBP1	4.5	0|4|6|3|0|0|1|0|2	0	0.56
TXNIP	RPL17-C18orf32	1	0|0|0|2|0|1|2|0|0	0	0.69
TXNIP	EIF4A1	19.5	4|32|37|8|1|3|7|4|5	0	0.68
TXNIP	HNRNPR	4	0|3|3|0|0|0|0|1|0	0.19	0.33
TXNIP	KRT19	109	54|49|38|169|73|243|268|69|95	0	0.69
TXNIP	KRT18	47.5	31|25|11|54|39|96|134|30|58	0	0.69
TXNIP	MYH10	10.5	1|11|19|0|5|0|0|0|0	0	0.61
TXNIP	KRT77	2.5	0|0|33|0|0|33|19|22|16	0	0.69
TXNIP	MYH9	19.5	3|17|98|19|4|0|3|0|0	0	0.68
TXNIP	CFL1	5	0|5|8|5|0|0|1|1|0	0	0.6
TXNIP	SF3B4	2.5	0|2|1|1|0|2|1|2|0	0.02	0.42
TXNIP	RPLP2	23	9|18|22|15|9|15|25|12|12	0	0.67
TXNIP	RPLP1	5	0|3|3|2|0|1|5|2|2	0.01	0.44
TXNIP	RPLP0	14.5	8|9|13|10|9|14|17|6|9	0	0.66
TXNIP	MYO1C	14	3|4|7|11|7|18|18|5|10	0	0.67
TXNIP	RPS11	3.5	2|3|2|3|0|3|5|0|3	0	0.54
TXNIP	PRKDC	59	13|11|13|34|9|36|49|9|6	0	0.67
TXNIP	RPS7	4	0|4|10|2|0|0|2|2|2	0	0.58
TXNIP	KRT2	27.5	38|69|164|21|43|185|73|141|79	0	0.69
TXNIP	RPS5	1	0|1|3|1|0|1|2|0|0	0	0.47
TXNIP	RPS3	9.5	4|19|24|14|4|9|23|5|5	0	0.69
TXNIP	RPS2	4.5	1|7|11|5|3|5|8|3|3	0	0.65
TXNIP	HNRNPH1	18	3|17|14|2|8|4|11|13|6	0	0.65
TXNIP	HIST1H2BM	4	1|0|4|0|4|0|0|0|0	0.1	0.36
TXNIP	ATP5B	43	6|50|67|41|5|9|18|11|4	0	0.68
TXNIP	VDAC1	14	0|14|19|14|0|10|12|5|3	0	0.67
TXNIP	KRT8	160	74|67|36|232|122|347|461|109|194	0	0.69
TXNIP	RPS9	6	6|9|10|7|4|6|11|4|4	0	0.65
TXNIP	RPS8	5	2|7|14|9|3|3|3|1|4	0	0.66
TXNIP	HSP90AB1	137.5	16|64|99|48|13|22|37|19|11	0	0.68
TXNIP	RPL35	2.5	1|5|4|4|2|1|4|2|2	0	0.6
TXNIP	RPL8	3.5	0|2|9|4|0|1|2|0|2	0	0.6
TXNIP	HIST1H2BH	4	1|0|4|0|4|0|0|0|0	0.1	0.36
TXNIP	ATP5A1	39.5	16|54|51|33|13|37|51|37|15	0	0.69
TXNIP	H1FX	4	1|0|0|3|1|1|3|0|0	0.34	0.3
TXNIP	HNRNPU	14.5	0|9|18|8|3|1|3|3|9	0	0.64
TXNIP	C1QBP	12	7|12|8|9|4|2|3|2|4	0	0.61
TXNIP	HIST1H2AD	1	0|1|4|1|0|1|1|1|1	0	0.47
TXNIP	HNRNPK	15.5	1|12|19|12|1|4|6|2|2	0	0.66
TXNIP	HNRNPM	13	2|7|7|24|11|26|28|9|6	0	0.68
TXNIP	FUBP3	3.5	0|4|3|6|0|10|16|0|0	0	0.69
TXNIP	BSG	4	0|2|1|4|0|2|4|3|0	0	0.48
TXNIP	HNRNPD	4	0|5|7|4|0|2|2|0|0	0	0.6
TXNIP	RPL27A	3.5	2|3|5|3|1|3|5|4|1	0	0.59
TXNIP	HNRNPF	15	2|13|7|3|9|4|11|13|3	0	0.64
TXNIP	RPS26	2.5	3|7|6|5|3|4|9|6|1	0	0.69
TXNIP	RPS27	9	5|19|9|17|3|17|28|23|19	0	0.69
TXNIP	RPS24	3	2|1|3|3|0|3|7|1|2	0	0.59
TXNIP	RPS25	3.5	3|5|5|10|3|4|6|3|2	0	0.69
TXNIP	RPS20	5.5	0|5|8|4|0|2|6|3|2	0	0.62
TXNIP	HNRNPA0	2.5	0|2|3|2|4|0|1|2|4	0	0.57
TXNIP	RBM14	5	5|7|4|8|7|9|13|4|8	0	0.69
TXNIP	RPS28	2.5	1|2|2|1|2|1|4|0|1	0.01	0.46
TXNIP	ENO1	53	5|82|94|41|5|6|13|5|0	0	0.69
TXNIP	H2AFJ	1	0|1|4|1|0|1|1|1|1	0	0.47
TXNIP	IGF2BP1	10	4|8|10|10|4|8|13|9|3	0	0.65
TXNIP	HIST1H1E	30.5	2|4|5|7|5|4|5|3|3	0.5	0.07
TXNIP	IGF2BP3	20	2|7|7|9|3|7|5|4|3	0.5	0.07
TXNIP	HNRNPUL1	30.5	2|22|5|10|3|12|25|31|4	0	0.67
TXNIP	HIST1H1C	2	2|4|5|7|5|4|5|3|3	0	0.69
TXNIP	STAU1	9	2|1|0|8|3|5|14|2|4	0	0.64
TXNIP	HIST2H2AA3	1	0|1|4|1|0|1|1|1|1	0	0.47
TXNIP	MYL12B	1.5	0|1|3|0|0|0|0|0|0	0.05	0.39
TXNIP	RPSA	5.5	2|7|11|7|2|5|8|4|3	0	0.64
TXNIP	IRS4	152	36|35|21|29|53|39|64|68|45	0.5	0.09
TXNIP	RTCB	5.5	0|3|4|7|0|2|4|0|5	0	0.55
TXNIP	SKIV2L2	3.5	0|4|3|3|0|3|3|2|1	0	0.49
TXNIP	ACTN4	31	5|15|45|10|21|0|0|0|10	0	0.67
TXNIP	RPS4X	10	4|16|13|11|9|10|14|8|11	0	0.66
TXNIP	SRRM1	8	1|6|5|2|8|3|10|9|6	0	0.64
TXNIP	BASP1	9.5	0|10|15|8|2|0|5|0|0	0	0.63
TXNIP	RPL10A	2.5	2|4|10|2|4|1|4|0|0	0	0.69
TXNIP	ATP1A1	6.5	7|10|6|19|4|13|16|7|5	0	0.69
TXNIP	HSP90AA1	112.5	10|49|67|46|10|20|32|15|7	0	0.66
TXNIP	CAPZA2	3	2|3|5|3|3|1|0|0|2	0	0.54
TXNIP	FBL	24.5	0|3|5|2|4|4|5|7|5	1	0
TXNIP	RPS13	6.5	2|10|10|7|5|4|11|7|4	0	0.66
TXNIP	RPS12	1	0|2|3|2|0|2|2|0|0	0	0.51
TXNIP	TMPO	15	2|10|9|12|5|3|10|5|2	0	0.61
TXNIP	RPS10	6.5	2|7|11|5|7|4|12|5|3	0	0.65
TXNIP	RPS17	1.5	0|2|8|0|0|1|4|2|0	0	0.62
TXNIP	RPS16	6	2|7|12|5|2|4|11|2|2	0	0.66
TXNIP	RPL23A	6	3|7|6|11|3|3|13|2|2	0	0.66
TXNIP	RPS14	7.5	6|10|13|7|8|10|15|7|6	0	0.69
TXNIP	PHB2	14	4|14|12|7|3|7|11|7|7	0	0.63
TXNIP	EEF1A1	67.5	10|62|60|16|38|18|52|50|12	0	0.68
TXNIP	RPS19	4.5	3|7|8|8|3|4|12|3|3	0	0.66
TXNIP	RPS18	6	4|13|12|9|4|7|12|7|6	0	0.69
TXNIP	SF3B1	18	0|0|2|6|0|2|5|4|0	0.99	0
TXNIP	SF3B3	21.5	0|10|5|5|3|4|2|4|5	0.93	0.01
TXNIP	SF3B2	13	1|4|5|0|1|0|0|5|0	0.52	0.06
TXNIP	HIST1H1D	30.5	2|4|5|7|5|4|5|3|3	0.5	0.07
TXNIP	HSPA1B	182.5	24|55|59|45|23|45|63|49|35	1	0
TXNIP	HSPA1A	91.5	12|28|30|23|11|22|32|24|17	1	0
TXNIP	HIST2H2BF	8.5	2|1|8|2|7|1|3|0|0	0.17	0.34
TXNIP	HIST1H2AJ	1	0|1|4|1|0|1|1|1|1	0	0.47
TXNIP	LARP4	1.5	0|0|0|1|0|0|4|0|0	0.02	0.43
TXNIP	HIST1H2AG	1	0|1|4|1|0|1|1|1|1	0	0.47
TXNIP	RPL31	4.5	3|4|4|4|2|3|4|1|0	0	0.51
TXNIP	HIST1H2AC	3	0|0|10|1|0|1|4|1|1	0	0.56
TXNIP	HIST1H2AB	3	0|0|10|1|0|1|4|1|1	0	0.56
TXNIP	YWHAZ	10	0|12|28|10|5|6|9|4|3	0	0.67
TXNIP	DDX17	7.5	0|10|10|7|0|3|5|3|13	0	0.66
TXNIP	RPL29	3.5	2|2|3|4|2|4|3|2|2	0	0.54
TXNIP	NOP58	7.5	2|1|6|2|2|1|6|0|0	0.01	0.46
TXNIP	NAP1L1	15	3|7|5|3|0|0|3|1|0	0.72	0.03
TXNIP	RPL27	3.5	2|7|9|3|4|2|7|0|2	0	0.69
TXNIP	YWHAQ	7.5	4|6|15|6|6|4|6|2|2	0	0.64
TXNIP	RPL21	6.5	2|5|8|4|5|1|8|0|0	0	0.59
TXNIP	NOP56	3.5	5|0|0|2|2|2|3|0|0	0	0.52
TXNIP	RPL23	65.5	62|65|19|63|55|63|116|72|61	0	0.69
TXNIP	RPL22	1.5	1|1|3|3|1|1|2|0|1	0	0.53
TXNIP	HSPD1	50.5	16|53|52|29|18|28|35|26|16	0	0.68
TXNIP	HNRNPA2B1	8	1|8|19|8|6|0|4|2|2	0	0.66
TXNIP	YWHAB	7	0|9|22|9|0|0|8|0|0	0	0.67
TXNIP	G3BP1	4	0|3|9|4|0|0|2|0|0	0	0.58
TXNIP	CCT6A	11	0|8|13|9|0|3|5|0|0	0	0.64
TXNIP	SLC25A1	6	4|6|4|5|6|5|10|10|6	0	0.65
TXNIP	YWHAE	15.5	0|25|19|12|9|7|11|6|3	0	0.67
TXNIP	PABPN1	2.5	0|0|0|0|0|0|0|0|0	0.5	0.08
TXNIP	HNRNPA1	7	0|7|15|4|2|0|3|1|3	0	0.62
TXNIP	PRDX1	6	2|9|22|18|1|3|3|0|0	0	0.68
TXNIP	YWHAG	6	4|7|14|7|6|4|6|3|2	0	0.65
TXNIP	MYBBP1A	6	3|6|2|8|5|5|9|2|0	0	0.61
TXNIP	TARDBP	5.5	0|4|5|2|0|2|2|1|0	0.01	0.44
TXNIP	HIST1H3D	1	0|1|4|1|0|1|1|1|1	0	0.47
TXNIP	FLNA	47	3|44|57|55|16|2|15|0|0	0	0.68
TXNIP	HIST2H2AC	1	0|1|4|1|0|1|1|1|1	0	0.47
TXNIP	RPL28	2.5	0|3|2|3|0|3|3|0|0	0	0.52
TXNIP	DDX21	6.5	1|7|7|5|4|1|3|0|0	0	0.56
TXNIP	EIF4E2	3	0|1|1|1|0|3|9|3|4	0	0.61
TXNIP	RPL38	13	6|19|3|14|7|13|28|14|12	0	0.68
TXNIP	PPP1CA	11.5	0|4|0|2|0|2|5|4|2	0.5	0.12
TXNIP	RPL36	2	3|0|0|3|4|0|3|0|0	0	0.56
TXNIP	HNRNPC	17	5|2|13|10|15|9|11|2|2	0	0.6
TXNIP	SRRM2	8	7|2|3|8|4|0|0|0|0	0	0.58
TXNIP	RPA1	8	1|0|0|6|2|0|5|0|0	0.01	0.45
TXNIP	RBMX	3.5	3|3|3|3|4|1|0|1|2	0	0.49
TXNIP	NONO	18	9|16|9|9|9|13|7|8|5	0	0.63
TXNIP	SPTAN1	10.5	4|5|27|5|15|0|0|0|0	0	0.66
TXNIP	NCL	25	4|18|23|21|5|3|7|0|9	0	0.67
TXNIP	HIST3H2A	3	0|0|10|1|0|1|4|1|1	0	0.56
TXNIP	RPL24	9	4|5|4|12|6|8|11|4|5	0	0.65
TXNIP	PHB	6.5	0|10|10|4|0|3|3|3|3	0	0.63
TXNIP	EWSR1	4	0|2|3|4|0|0|1|0|0	0.03	0.41
TXNIP	ILF3	30.5	3|0|8|11|6|8|11|0|3	0.5	0.07
TXNIP	ILF2	23	0|7|11|10|9|12|11|4|3	0.5	0.12

## Sheet: C.Fly Positive PPIs
Bait (Annotataion Id)	Bait_FlybaseId	Bait_Symbol	Prey (Annotataion ID)	Prey_FlybaseId	Prey_Symbol	Average spectral count	Control counts	SAINTexpress scores	FDR	Reference
CG2993	FBgn0037521	CG2993	CG4943	FBgn0029006	Smurf	2.5	0|0|0|0|0|0|0|0|0|0|0	0.98	0	STRING
CG10086	FBgn0037517	CG10086	CG42279	FBgn0259174	Nedd4	174	0|0|0|2|0|0|2|0|0|0|0	1	0	STRING
CG2641	FBgn0037518	CG2641	CG33193	FBgn0053193	sav	8.5	0|0|0|6|3|0|0|0|0|0|0	0.41	0.28	GeneMania
CG10086	FBgn0037517	CG10086	CG4005	FBgn0034970	yki	12	0|0|0|0|0|0|6|0|0|0|1	0.8	0.02	STRING
CG10086	FBgn0037517	CG10086	CG8367	FBgn0000289	cg	1	0|0|0|3|4|0|4|0|0|0|4	0	0.59	GeneMania
CG2993	FBgn0037521	CG2993	CG42279	FBgn0259174	Nedd4	246	0|0|0|2|0|0|2|0|0|0|0	1	0	STRING
CG18748	FBgn0042105	CG18748	CG33967	FBgn0262127	kibra	1	0|0|0|5|5|0|2|0|0|0|0	0	0.59	STRING
CG2641	FBgn0037518	CG2641	CG4005	FBgn0034970	yki	2	0|0|0|0|0|0|6|0|0|0|1	0	0.46	STRING
CG7047	FBgn0035103	Vdup1	CG2677	FBgn0024996	eIF2Bbeta	2	0|0|0|0|0|0|0|0|0|0|0	0.5	0.12	STRING
CG1105	FBgn0037465	CG1105	CG42279	FBgn0259174	Nedd4	1.5	0|0|0|2|0|0|2|0|0|0|0	0.1	0.36	STRING
CG2993	FBgn0037521	CG2993	CG4005	FBgn0034970	yki	6.5	0|0|0|0|0|0|6|0|0|0|1	0.4	0.28	STRING
CG10086	FBgn0037517	CG10086	CG4244	FBgn0003557	Su(dx)	9.5	0|0|0|0|0|0|0|0|0|0|0	1	0	STRING
CG2641	FBgn0037518	CG2641	CG4244	FBgn0003557	Su(dx)	9.5	0|0|0|0|0|0|0|0|0|0|0	1	0	STRING
CG4674	FBgn0037856	Leash	CG4943	FBgn0029006	Smurf	38	0|0|0|0|0|0|0|0|0|0|0	1	0	STRING
CG4674	FBgn0037856	Leash	CG42574	FBgn0260794	ctrip	4.5	0|0|0|0|0|0|9|0|0|0|0	0.05	0.39	STRING
CG18748	FBgn0042105	CG18748	CG42279	FBgn0259174	Nedd4	6	0|0|0|2|0|0|2|0|0|0|0	0.6	0.05	STRING
CG2993	FBgn0037521	CG2993	CG4244	FBgn0003557	Su(dx)	14.5	0|0|0|0|0|0|0|0|0|0|0	1	0	STRING
CG2641	FBgn0037518	CG2641	CG42279	FBgn0259174	Nedd4	51.5	0|0|0|2|0|0|2|0|0|0|0	1	0	STRING
CG2993	FBgn0037521	CG2993	CG42797	FBgn0261931	CG42797	67.5	0|0|0|0|0|0|0|0|0|0|0	1	0	STRING
CG18745	FBgn0042102	CG18745	CG4244	FBgn0003557	Su(dx)	1	0|0|0|0|0|0|0|0|0|0|0	0.48	0.17	STRING
CG4674	FBgn0037856	Leash	CG42279	FBgn0259174	Nedd4	923	0|0|0|2|0|0|2|0|0|0|0	1	0	STRING
CG4674	FBgn0037856	Leash	CG33967	FBgn0262127	kibra	17.5	0|0|0|5|5|0|2|0|0|0|0	1	0	STRING
CG2641	FBgn0037518	CG2641	CG42797	FBgn0261931	CG42797	17	0|0|0|0|0|0|0|0|0|0|0	1	0	STRING
CG4674	FBgn0037856	Leash	CG4005	FBgn0034970	yki	23	0|0|0|0|0|0|6|0|0|0|1	0.99	0	STRING
CG18747	FBgn0042104	CG18747	CG42279	FBgn0259174	Nedd4	2	0|0|0|2|0|0|2|0|0|0|0	0.06	0.38	STRING
CG7047	FBgn0035103	Vdup1	CG4799	FBgn0267727	Pen	4	6|0|3|14|10|3|4|2|0|0|6	0	0.66	STRING
CG7047	FBgn0035103	Vdup1	CG9423	FBgn0027338	Kap-alpha3	4.5	5|1|5|11|7|4|6|3|4|6|5	0	0.64	STRING
CG10086	FBgn0037517	CG10086	CG42797	FBgn0261931	CG42797	58	0|0|0|0|0|0|0|0|0|0|0	1	0	STRING
CG4674	FBgn0037856	Leash	CG4244	FBgn0003557	Su(dx)	240	0|0|0|0|0|0|0|0|0|0|0	1	0	STRING
CG10086	FBgn0037517	CG10086	CG33967	FBgn0262127	kibra	2	0|0|0|5|5|0|2|0|0|0|0	0	0.58	STRING ; GeneMania
CG4674	FBgn0037856	Leash	CG42797	FBgn0261931	CG42797	62.5	0|0|0|0|0|0|0|0|0|0|0	1	0	STRING
CG2993	FBgn0037521	CG2993	CG11734	FBgn0031107	HERC2	1	0|0|0|0|0|0|0|0|0|0|0	0.48	0.17	STRING
CG1105	FBgn0037465	CG1105	CG8548	FBgn0024889	Kap-alpha1	2.5	0|0|0|4|3|0|2|0|0|0|0	0	0.51	STRING
CG1105	FBgn0037465	CG1105	CG7809	FBgn0036919	Grasp65	1.5	0|0|0|0|0|0|0|0|0|0|2	0.23	0.31	STRING
CG1105	FBgn0037465	CG1105	CG6668	FBgn0039213	atl	259	0|0|0|2|2|0|0|0|0|0|0	1	0	STRING ; DpiM (Guruharsha et al., 2011)
CG1105	FBgn0037465	CG1105	CG42574	FBgn0260794	ctrip	1.5	0|0|0|0|0|0|9|0|0|0|0	0	0.52	STRING
CG18745	FBgn0042102	CG18745	CG42279	FBgn0259174	Nedd4	4.5	0|0|0|2|0|0|2|0|0|0|0	0.59	0.05	STRING
CG1105	FBgn0037465	CG1105	CG4799	FBgn0267727	Pen	7.5	6|0|3|14|10|3|4|2|0|0|6	0	0.64	STRING
CG7047	FBgn0035103	Vdup1	CG8548	FBgn0024889	Kap-alpha1	3.5	0|0|0|4|3|0|2|0|0|0|0	0	0.47	STRING
CG1105	FBgn0037465	CG1105	CG9423	FBgn0027338	Kap-alpha3	5	5|1|5|11|7|4|6|3|4|6|5	0	0.63	STRING
CG10086	FBgn0037517	CG10086	CG4943	FBgn0029006	Smurf	59.5	0|0|0|0|0|0|0|0|0|0|0	1	0	STRING
CG4674	FBgn0037856	Leash	CG11734	FBgn0031107	HERC2	20.5	0|0|0|0|0|0|0|0|0|0|0	1	0	STRING
CG7047	FBgn0035103	Vdup1	CG33967	FBgn0262127	kibra	2.5	0|0|0|5|5|0|2|0|0|0|0	0	0.57	STRING
CG18745	FBgn0042102	CG18745	CG42797	FBgn0261931	CG42797	11.5	0|0|0|0|0|0|0|0|0|0|0	1	0	STRING
CG7047	FBgn0035103	Vdup1	CG7883	FBgn0039726	eIF2Balpha	3.5	0|0|0|0|0|0|0|0|0|0|0	0.98	0	STRING
CG2993	FBgn0037521	CG2993	CG33967	FBgn0262127	kibra	3.5	0|0|0|5|5|0|2|0|0|0|0	0	0.55	STRING

## Sheet: D. Fly negative PPIs
Bait (Annotataion Id)	Bait (Flybase Id)	Bait (Symbol)	Prey (Annotataion Id)	Prey (Flybase Id)	Prey (Symbol)	Average spectral count	Control counts	SAINTexpress scores	FDR
CG18747	FBgn0042104	CG18747	CG3395	FBgn0010408	RpS9	3.5	9|1|8|9|8|7|8|2|4|0|6	0	0.7
CG18747	FBgn0042104	CG18747	CG5502	FBgn0003279	RpL4	6.5	8|0|10|24|26|3|34|0|0|0|16	0	0.7
CG18747	FBgn0042104	CG18747	CG7380	FBgn0031977	baf	1	62|3|27|1|1|1|5|4|1|1|3	0	0.7
CG18747	FBgn0042104	CG18747	CG17870	FBgn0004907	14-3-3zeta	3	5|0|5|20|20|0|27|2|3|0|22	0	0.7
CG18747	FBgn0042104	CG18747	CG15693	FBgn0019936	D	2	10|1|7|10|9|6|8|2|4|2|3	0	0.7
CG18747	FBgn0042104	CG18747	CG15697	FBgn0038834	RpS30	1.5	4|0|3|3|3|2|4|1|1|1|2	0	0.7
CG18747	FBgn0042104	CG18747	CG10811	FBgn0023213	eIF4G1	25	14|5|19|70|75|11|36|7|14|20|30	0	0.7
CG18747	FBgn0042104	CG18747	CG3949	FBgn0015393	hoip	2.5	3|0|2|4|3|2|50|2|2|1|3	0	0.7
CG18747	FBgn0042104	CG18747	CG10944	FBgn0261592	RpS6	4	3|0|5|8|7|4|7|5|2|1|5	0	0.63
CG18747	FBgn0042104	CG18747	CG5119	FBgn0265297	pAbp	13	10|0|18|39|32|10|28|4|5|6|12	0	0.69
CG18747	FBgn0042104	CG18747	CG8715	FBgn0020279	lig	5.5	2|0|11|11|13|1|13|1|0|0|6	0	0.67
CG18747	FBgn0042104	CG18747	CG9946	FBgn0261609	eIF2alpha	8.5	6|0|9|8|8|6|12|2|0|0|8	0	0.64
CG18747	FBgn0042104	CG18747	CG9412	FBgn0015778	rin	4.5	0|0|5|9|11|0|11|0|2|2|12	0	0.67
CG18747	FBgn0042104	CG18747	CG16901	FBgn0263396	sqd	4	2|0|7|7|4|0|8|0|2|2|5	0	0.63
CG18747	FBgn0042104	CG18747	CG3401	FBgn0003888	betaTub60D	29	64|0|87|80|55|74|52|34|20|22|9	0	0.7
CG18747	FBgn0042104	CG18747	CG9916	FBgn0004432	Cyp1	4	2|3|12|12|9|0|21|0|4|0|11	0	0.7
CG18747	FBgn0042104	CG18747	CG10686	FBgn0041775	tral	1	0|0|0|12|13|0|19|0|0|0|5	0	0.7
CG18747	FBgn0042104	CG18747	CG1524	FBgn0004403	RpS14a	8	9|0|7|13|13|13|10|9|10|8|7	0	0.7
CG18747	FBgn0042104	CG18747	CG4046	FBgn0034743	RpS16	9	14|0|14|13|16|20|14|10|15|9|12	0	0.7
CG18747	FBgn0042104	CG18747	CG11276	FBgn0011284	RpS4	10	11|1|3|29|25|10|22|6|9|5|7	0	0.69
CG18747	FBgn0042104	CG18747	CG8415	FBgn0033912	RpS23	4.5	6|0|5|10|8|6|11|3|7|1|4	0	0.7
CG18747	FBgn0042104	CG18747	CG3922	FBgn0005533	RpS17	11	13|0|8|17|13|16|10|7|10|5|3	0	0.67
CG18747	FBgn0042104	CG18747	CG5330	FBgn0015268	Nap1	5.5	7|0|7|15|7|4|10|2|0|0|4	0	0.66
CG18747	FBgn0042104	CG18747	CG2033	FBgn0010198	RpS15Aa	6.5	5|1|5|11|9|7|6|2|6|3|8	0	0.65
CG18747	FBgn0042104	CG18747	CG6141	FBgn0015756	RpL9	2	2|1|3|5|6|0|5|3|3|0|4	0	0.7
CG18747	FBgn0042104	CG18747	CG13389	FBgn0010265	RpS13	2.5	12|0|7|17|16|13|17|8|6|2|8	0	0.7
CG18747	FBgn0042104	CG18747	CG1821	FBgn0285949	RpL31	2	3|0|0|6|4|4|9|3|3|3|6	0	0.7
CG18747	FBgn0042104	CG18747	CG10279	FBgn0003261	Rm62	15	5|2|11|40|40|12|33|7|14|7|18	0	0.69
CG18747	FBgn0042104	CG18747	CG9277	FBgn0284243	betaTub56D	53.5	43|7|70|250|198|71|166|69|35|39|25	0	0.7
CG18747	FBgn0042104	CG18747	CG6253	FBgn0017579	RpL14	3.5	6|2|7|10|10|4|13|3|3|3|11	0	0.7
CG18747	FBgn0042104	CG18747	CG11844	FBgn0046214	vig2	7.5	0|1|4|13|16|0|19|0|4|4|8	0	0.68
CG18747	FBgn0042104	CG18747	CG8983	FBgn0033663	ERp60	4	4|5|16|45|36|0|36|3|4|2|24	0	0.7
CG18747	FBgn0042104	CG18747	CG15792	FBgn0265434	zip	105	138|18|165|76|86|16|147|47|5|3|84	0	0.69
CG18747	FBgn0042104	CG18747	CG3333	FBgn0259937	Nop60B	2.5	6|0|3|3|5|0|9|0|3|2|2	0	0.62
CG18747	FBgn0042104	CG18747	CG5519	FBgn0261119	Prp19	1.5	7|0|2|11|11|2|13|0|0|0|3	0	0.7
CG18747	FBgn0042104	CG18747	CG8280	FBgn0284245	eEF1alpha1	30	43|3|44|85|87|53|63|34|23|23|48	0	0.7
CG18747	FBgn0042104	CG18747	CG11999	FBgn0037312	CG11999	3.5	7|1|5|49|55|8|23|6|4|7|17	0	0.7
CG18747	FBgn0042104	CG18747	CG10305	FBgn0261597	RpS26	2	2|0|3|3|3|4|3|0|0|0|2	0	0.55
CG18747	FBgn0042104	CG18747	CG1883	FBgn0039757	RpS7	12	22|0|12|27|28|36|19|19|13|7|8	0	0.7
CG18747	FBgn0042104	CG18747	CG2998	FBgn0030136	RpS28b	1.5	3|0|1|2|2|2|4|2|3|2|3	0	0.7
CG18747	FBgn0042104	CG18747	CG7977	FBgn0026372	RpL23A	2	10|1|13|8|8|3|36|1|2|0|8	0	0.7
CG18747	FBgn0042104	CG18747	CG7622	FBgn0002579	RpL36	1.5	0|0|0|5|4|1|8|1|0|0|2	0	0.63
CG18747	FBgn0042104	CG18747	CG10423	FBgn0039300	RpS27	4	11|0|10|9|9|13|7|8|5|8|4	0	0.7
CG18747	FBgn0042104	CG18747	CG4035	FBgn0015218	eIF4E1	1.5	7|0|5|12|9|2|7|0|2|3|5	0	0.7
CG18747	FBgn0042104	CG18747	CG5654	FBgn0022959	yps	4	2|0|7|18|22|0|34|0|3|2|7	0	0.7
CG18747	FBgn0042104	CG18747	CG9983	FBgn0001215	Hrb98DE	1	0|0|0|4|5|0|8|0|0|0|2	0	0.63
CG18747	FBgn0042104	CG18747	CG8615	FBgn0035753	RpL18	1.5	0|0|6|11|11|2|10|0|0|0|7	0	0.7
CG18747	FBgn0042104	CG18747	CG8900	FBgn0010411	RpS18	9.5	28|2|17|15|11|36|13|8|14|11|11	0	0.7
CG18747	FBgn0042104	CG18747	CG6684	FBgn0086472	RpS25	3.5	7|0|5|6|3|0|9|0|2|2|6	0	0.64
CG18747	FBgn0042104	CG18747	CG10652	FBgn0086710	RpL30	1	2|0|3|2|7|1|10|1|1|1|2	0	0.7
CG18747	FBgn0042104	CG18747	CG4147	FBgn0001218	Hsc70-3	51	28|8|40|84|92|42|76|19|25|26|44	0	0.69
CG18747	FBgn0042104	CG18747	CG7439	FBgn0087035	AGO2	5.5	5|0|5|8|4|2|10|3|0|0|2	0	0.63
CG18747	FBgn0042104	CG18747	CG3751	FBgn0261596	RpS24	4	0|0|0|4|4|5|3|2|2|1|0	0	0.56
CG18747	FBgn0042104	CG18747	CG7434	FBgn0015288	RpL22	1.5	6|0|7|7|8|3|13|1|2|0|8	0	0.7
CG18747	FBgn0042104	CG18747	CG16944	FBgn0003360	sesB	25.5	24|4|25|33|34|26|19|28|33|25|19	0	0.69
CG18747	FBgn0042104	CG18747	CG9748	FBgn0263231	bel	11.5	4|1|6|39|27|3|18|0|3|8|11	0	0.69
CG18747	FBgn0042104	CG18747	CG1242	FBgn0001233	Hsp83	16.5	15|8|52|81|70|11|79|12|12|9|41	0	0.7
CG18747	FBgn0042104	CG18747	CG3056	FBgn0024987	ssx	1	0|0|0|9|9|0|4|0|0|0|3	0	0.7
CG18747	FBgn0042104	CG18747	CG5920	FBgn0004867	RpS2	6.5	9|1|8|15|9|6|10|3|5|6|8	0	0.66
CG18747	FBgn0042104	CG18747	CG6341	FBgn0028737	eEF1beta	3	7|1|8|11|11|2|12|0|3|0|9	0	0.7
CG18747	FBgn0042104	CG18747	CG4651	FBgn0011272	RpL13	3	5|5|6|9|7|2|13|4|3|0|5	0	0.7
CG18747	FBgn0042104	CG18747	CG7111	FBgn0020618	Rack1	1	0|0|9|7|6|4|7|2|1|4|8	0	0.7
CG18747	FBgn0042104	CG18747	CG9282	FBgn0032518	RpL24	1	3|0|1|7|7|2|7|1|2|2|2	0	0.7
CG18747	FBgn0042104	CG18747	CG8332	FBgn0034138	RpS15	10	5|1|2|16|12|16|13|3|9|4|5	0	0.67
CG18747	FBgn0042104	CG18747	CG14648	FBgn0263594	lost	2.5	3|1|13|23|12|3|17|2|0|0|14	0	0.7
CG18747	FBgn0042104	CG18747	CG1101	FBgn0010774	Ref1	2.5	1|0|2|4|4|0|20|0|0|0|8	0	0.67
CG18747	FBgn0042104	CG18747	CG11522	FBgn0039857	RpL6	1	1|0|4|12|12|0|13|0|2|0|4	0	0.7
CG18747	FBgn0042104	CG18747	CG10630	FBgn0035608	blanks	8	0|3|10|15|14|0|15|3|0|2|8	0	0.67
CG18747	FBgn0042104	CG18747	CG4254	FBgn0011726	tsr	4.5	4|2|7|16|11|1|30|3|5|0|15	0	0.7
CG18747	FBgn0042104	CG18747	CG18811	FBgn0042134	Capr	2.5	0|0|0|5|7|0|5|0|0|0|6	0	0.62
CG18747	FBgn0042104	CG18747	CG5787	FBgn0032454	CG5787	5.5	3|1|1|7|7|0|54|0|0|0|2	0	0.69
CG18747	FBgn0042104	CG18747	CG4211	FBgn0004227	nonA	1	0|0|0|24|14|0|7|0|0|4|8	0	0.7
CG18747	FBgn0042104	CG18747	CG3201	FBgn0004687	Mlc-c	5.5	10|0|7|1|3|2|8|2|2|1|6	0	0.64
CG18747	FBgn0042104	CG18747	CG6946	FBgn0259139	glo	2	0|0|0|9|5|0|5|0|0|0|4	0	0.62
CG18747	FBgn0042104	CG18747	CG7808	FBgn0039713	RpS8	6	6|1|10|13|12|7|10|5|5|6|8	0	0.7
CG18747	FBgn0042104	CG18747	CG4869	FBgn0003890	betaTub97EF	11.5	13|3|27|45|37|0|35|0|0|0|1	0	0.69
CG18747	FBgn0042104	CG18747	CG1691	FBgn0285926	Imp	1	0|0|0|9|8|0|6|0|0|0|3	0	0.7
CG18747	FBgn0042104	CG18747	CG4264	FBgn0266599	Hsc70-4	91	71|17|85|147|159|75|141|61|47|44|93	0	0.69
CG18747	FBgn0042104	CG18747	CG6143	FBgn0004401	Pep	6	9|1|8|21|21|0|72|2|2|0|14	0	0.7
CG18747	FBgn0042104	CG18747	CG4898	FBgn0003721	Tm1	5.5	15|0|5|4|0|0|17|0|0|0|19	0	0.68
CG18747	FBgn0042104	CG18747	CG6779	FBgn0002622	RpS3	18.5	40|2|33|36|37|36|30|15|31|25|17	0	0.7
CG18747	FBgn0042104	CG18747	CG5827	FBgn0261608	RpL37A	1	1|0|2|2|3|2|3|3|0|0|2	0	0.54
CG18747	FBgn0042104	CG18747	CG2168	FBgn0017545	RpS3A	10	22|2|17|32|35|31|30|26|15|5|23	0	0.7
CG18747	FBgn0042104	CG18747	CG4897	FBgn0005593	RpL7	1.5	3|1|4|13|10|2|12|0|0|0|8	0	0.7
CG18747	FBgn0042104	CG18747	CG1913	FBgn0003884	alphaTub84B	14	8|4|13|23|18|14|18|11|12|11|10	0	0.68
CG18747	FBgn0042104	CG18747	CG7283	FBgn0036213	RpL10Ab	3.5	6|1|7|8|9|4|16|3|4|3|8	0	0.7
CG18747	FBgn0042104	CG18747	CG3661	FBgn0010078	RpL23	7.5	38|4|28|52|56|53|46|34|17|9|32	0	0.7
CG18746	FBgn0042103	CG18746	CG3395	FBgn0010408	RpS9	19.5	9|1|8|9|8|7|8|2|4|0|6	0.02	0.41
CG18746	FBgn0042103	CG18746	CG5502	FBgn0003279	RpL4	40	8|0|10|24|26|3|34|0|0|0|16	0	0.67
CG18746	FBgn0042103	CG18746	CG7380	FBgn0031977	baf	3.5	62|3|27|1|1|1|5|4|1|1|3	0	0.7
CG18746	FBgn0042103	CG18746	CG17870	FBgn0004907	14-3-3zeta	5	5|0|5|20|20|0|27|2|3|0|22	0	0.69
CG18746	FBgn0042103	CG18746	CG15693	FBgn0019936	RpS20	7	10|1|7|10|9|6|8|2|4|2|3	0	0.65
CG18746	FBgn0042103	CG18746	CG7939	FBgn0002626	RpL32	9	2|0|2|2|1|0|2|0|0|0|3	0.95	0.01
CG18746	FBgn0042103	CG18746	CG15697	FBgn0038834	RpS30	3	4|0|3|3|3|2|4|1|1|1|2	0	0.53
CG18746	FBgn0042103	CG18746	CG10811	FBgn0023213	eIF4G1	39	14|5|19|70|75|11|36|7|14|20|30	0	0.69
CG18746	FBgn0042103	CG18746	CG3949	FBgn0015393	hoip	11.5	3|0|2|4|3|2|50|2|2|1|3	0	0.68
CG18746	FBgn0042103	CG18746	CG10944	FBgn0261592	RpS6	11.5	3|0|5|8|7|4|7|5|2|1|5	0	0.55
CG18746	FBgn0042103	CG18746	CG6846	FBgn0036825	RpL26	15	2|0|3|1|3|2|6|0|0|0|5	0.92	0.01
CG18746	FBgn0042103	CG18746	CG8715	FBgn0020279	lig	2	2|0|11|11|13|1|13|1|0|0|6	0	0.7
CG18746	FBgn0042103	CG18746	CG9946	FBgn0261609	eIF2alpha	15.5	6|0|9|8|8|6|12|2|0|0|8	0	0.55
CG18746	FBgn0042103	CG18746	CG9412	FBgn0015778	rin	8	0|0|5|9|11|0|11|0|2|2|12	0	0.66
CG18746	FBgn0042103	CG18746	CG6995	FBgn0039229	Saf-B	3.5	0|0|0|5|6|0|9|0|0|0|2	0	0.6
CG18746	FBgn0042103	CG18746	CG16901	FBgn0263396	sqd	10.5	2|0|7|7|4|0|8|0|2|2|5	0	0.51
CG18746	FBgn0042103	CG18746	CG3401	FBgn0003888	betaTub60D	54.5	64|0|87|80|55|74|52|34|20|22|9	0	0.69
CG18746	FBgn0042103	CG18746	CG1242	FBgn0001233	Hsp83	20.5	15|8|52|81|70|11|79|12|12|9|41	0	0.7
CG18746	FBgn0042103	CG18746	CG10686	FBgn0041775	tral	9	0|0|0|12|13|0|19|0|0|0|5	0	0.67
CG18746	FBgn0042103	CG18746	CG5119	FBgn0265297	pAbp	47	10|0|18|39|32|10|28|4|5|6|12	0	0.68
CG18746	FBgn0042103	CG18746	CG1524	FBgn0004403	RpS14a	14	9|0|7|13|13|13|10|9|10|8|7	0	0.65
CG18746	FBgn0042103	CG18746	CG1633	FBgn0040309	Jafrac1	2.5	6|2|8|15|11|2|23|2|2|0|15	0	0.7
CG18746	FBgn0042103	CG18746	CG4046	FBgn0034743	RpS16	14	14|0|14|13|16|20|14|10|15|9|12	0	0.67
CG18746	FBgn0042103	CG18746	CG11276	FBgn0011284	RpS4	27	11|1|3|29|25|10|22|6|9|5|7	0	0.68
CG18746	FBgn0042103	CG18746	CG12775	FBgn0032987	RpL21	13	0|0|3|7|12|2|15|1|4|0|4	0	0.64
CG18746	FBgn0042103	CG18746	CG3314	FBgn0014026	RpL7A	21.5	3|0|6|13|8|0|18|0|0|0|9	0	0.6
CG18746	FBgn0042103	CG18746	CG10203	FBgn0028554	x16	2	0|0|0|4|4|0|2|0|0|0|2	0	0.55
CG18746	FBgn0042103	CG18746	CG8415	FBgn0033912	RpS23	16	6|0|5|10|8|6|11|3|7|1|4	0	0.5
CG18746	FBgn0042103	CG18746	CG7726	FBgn0013325	RpL11	5	2|1|1|3|2|3|4|1|0|0|4	0.01	0.43
CG18746	FBgn0042103	CG18746	CG3922	FBgn0005533	RpS17	15	13|0|8|17|13|16|10|7|10|5|3	0	0.66
CG18746	FBgn0042103	CG18746	CG5330	FBgn0015268	Nap1	10	7|0|7|15|7|4|10|2|0|0|4	0	0.65
CG18746	FBgn0042103	CG18746	CG2033	FBgn0010198	RpS15Aa	16	5|1|5|11|9|7|6|2|6|3|8	0	0.56
CG18746	FBgn0042103	CG18746	CG10377	FBgn0004838	Hrb27C	2	1|1|3|7|1|0|9|0|0|0|1	0	0.63
CG18746	FBgn0042103	CG18746	CG6141	FBgn0015756	RpL9	23.5	2|1|3|5|6|0|5|3|3|0|4	1	0
CG18746	FBgn0042103	CG18746	CG2746	FBgn0285950	RpL19	4.5	0|0|0|8|5|0|8|0|0|0|1	0	0.62
CG18746	FBgn0042103	CG18746	CG13389	FBgn0010265	RpS13	16.5	12|0|7|17|16|13|17|8|6|2|8	0	0.67
CG18746	FBgn0042103	CG18746	CG1821	FBgn0285949	RpL31	5	3|0|0|6|4|4|9|3|3|3|6	0	0.63
CG18746	FBgn0042103	CG18746	CG10279	FBgn0003261	Rm62	58	5|2|11|40|40|12|33|7|14|7|18	0	0.66
CG18746	FBgn0042103	CG18746	CG9277	FBgn0284243	betaTub56D	59.5	43|7|70|250|198|71|166|69|35|39|25	0	0.7
CG18746	FBgn0042103	CG18746	CG12740	FBgn0035422	RpL28	13.5	4|0|4|7|6|0|15|0|0|0|6	0	0.6
CG18746	FBgn0042103	CG18746	CG6253	FBgn0017579	RpL14	19	6|2|7|10|10|4|13|3|3|3|11	0	0.59
CG18746	FBgn0042103	CG18746	CG11844	FBgn0046214	vig2	4.5	0|1|4|13|16|0|19|0|4|4|8	0	0.7
CG18746	FBgn0042103	CG18746	CG8983	FBgn0033663	ERp60	6	4|5|16|45|36|0|36|3|4|2|24	0	0.7
CG18746	FBgn0042103	CG18746	CG15792	FBgn0265434	zip	51.5	138|18|165|76|86|16|147|47|5|3|84	0	0.7
CG18746	FBgn0042103	CG18746	CG4027	FBgn0000042	Act5C	40	0|22|0|93|85|0|0|60|36|22|78	0	0.69
CG18746	FBgn0042103	CG18746	CG17420	FBgn0028697	RpL15	4	0|0|4|3|3|0|4|0|0|0|2	0	0.52
CG18746	FBgn0042103	CG18746	CG3333	FBgn0259937	Nop60B	24	6|0|3|3|5|0|9|0|3|2|2	1	0
CG18746	FBgn0042103	CG18746	CG5519	FBgn0261119	Prp19	49.5	7|0|2|11|11|2|13|0|0|0|3	1	0
CG18746	FBgn0042103	CG18746	CG8280	FBgn0284245	eEF1alpha1	33.5	43|3|44|85|87|53|63|34|23|23|48	0	0.7
CG18746	FBgn0042103	CG18746	CG11999	FBgn0037312	CG11999	14.5	7|1|5|49|55|8|23|6|4|7|17	0	0.7
CG18746	FBgn0042103	CG18746	CG10305	FBgn0261597	RpS26	3	2|0|3|3|3|4|3|0|0|0|2	0	0.52
CG18746	FBgn0042103	CG18746	CG6203	FBgn0028734	Fmr1	14.5	0|0|0|2|4|0|9|0|0|0|7	0.02	0.41
CG18746	FBgn0042103	CG18746	CG9075	FBgn0001942	eIF4A	6	1|0|6|20|12|1|16|2|0|0|8	0	0.68
CG18746	FBgn0042103	CG18746	CG9916	FBgn0004432	Cyp1	3	2|3|12|12|9|0|21|0|4|0|11	0	0.7
CG18746	FBgn0042103	CG18746	CG2998	FBgn0030136	RpS28b	2.5	3|0|1|2|2|2|4|2|3|2|3	0	0.54
CG18746	FBgn0042103	CG18746	CG9862	FBgn0034646	Rae1	2	0|0|0|5|2|0|9|0|0|0|1	0	0.62
CG18746	FBgn0042103	CG18746	CG7977	FBgn0026372	RpL23A	19.5	10|1|13|8|8|3|36|1|2|0|8	0	0.67
CG18746	FBgn0042103	CG18746	CG7622	FBgn0002579	RpL36	7.5	0|0|0|5|4|1|8|1|0|0|2	0	0.55
CG18746	FBgn0042103	CG18746	CG10423	FBgn0039300	RpS27	9.5	11|0|10|9|9|13|7|8|5|8|4	0	0.65
CG18746	FBgn0042103	CG18746	CG4035	FBgn0015218	eIF4E1	11.5	7|0|5|12|9|2|7|0|2|3|5	0	0.62
CG18746	FBgn0042103	CG18746	CG5654	FBgn0022959	yps	42.5	2|0|7|18|22|0|34|0|3|2|7	0	0.65
CG18746	FBgn0042103	CG18746	CG8615	FBgn0035753	RpL18	18	0|0|6|11|11|2|10|0|0|0|7	0	0.54
CG18746	FBgn0042103	CG18746	CG8900	FBgn0010411	RpS18	16	28|2|17|15|11|36|13|8|14|11|11	0	0.69
CG18746	FBgn0042103	CG18746	CG6684	FBgn0086472	RpS25	5.5	7|0|5|6|3|0|9|0|2|2|6	0	0.63
CG18746	FBgn0042103	CG18746	CG4337	FBgn0010438	mtSSB	1	23|3|33|3|3|2|8|0|0|0|7	0	0.7
CG18746	FBgn0042103	CG18746	CG10652	FBgn0086710	RpL30	8	2|0|3|2|7|1|10|1|1|1|2	0	0.58
CG18746	FBgn0042103	CG18746	CG4147	FBgn0001218	Hsc70-3	51.5	28|8|40|84|92|42|76|19|25|26|44	0	0.69
CG18746	FBgn0042103	CG18746	CG7439	FBgn0087035	AGO2	16.5	5|0|5|8|4|2|10|3|0|0|2	0.1	0.36
CG18746	FBgn0042103	CG18746	CG3751	FBgn0261596	RpS24	5.5	0|0|0|4|4|5|3|2|2|1|0	0	0.49
CG18746	FBgn0042103	CG18746	CG3056	FBgn0024987	ssx	5	0|0|0|9|9|0|4|0|0|0|3	0	0.63
CG18746	FBgn0042103	CG18746	CG17489	FBgn0064225	RpL5	19	4|0|3|8|12|2|12|0|2|1|6	0	0.57
CG18746	FBgn0042103	CG18746	CG8882	FBgn0015834	eIF3i	8.5	0|0|0|5|7|0|8|0|0|0|4	0	0.57
CG18746	FBgn0042103	CG18746	CG17521	FBgn0024733	RpL10	6	1|0|2|6|4|0|3|0|0|0|4	0	0.51
CG18746	FBgn0042103	CG18746	CG6143	FBgn0004401	Pep	40.5	9|1|8|21|21|0|72|2|2|0|14	0	0.69
CG18746	FBgn0042103	CG18746	CG9748	FBgn0263231	bel	23	4|1|6|39|27|3|18|0|3|8|11	0	0.68
CG18746	FBgn0042103	CG18746	CG6751	FBgn0263510	nclb	8.5	0|1|3|2|2|0|2|0|0|0|3	0.67	0.04
CG18746	FBgn0042103	CG18746	CG4679	FBgn0033816	CG4679	1	0|0|0|4|2|0|2|0|0|0|1	0	0.52
CG18746	FBgn0042103	CG18746	CG1883	FBgn0039757	RpS7	18.5	22|0|12|27|28|36|19|19|13|7|8	0	0.69
CG18746	FBgn0042103	CG18746	CG5920	FBgn0004867	RpS2	20	9|1|8|15|9|6|10|3|5|6|8	0	0.58
CG18746	FBgn0042103	CG18746	CG6341	FBgn0028737	eEF1beta	9	7|1|8|11|11|2|12|0|3|0|9	0	0.66
CG18746	FBgn0042103	CG18746	CG4651	FBgn0011272	RpL13	13	5|5|6|9|7|2|13|4|3|0|5	0	0.6
CG18746	FBgn0042103	CG18746	CG2168	FBgn0017545	RpS3A	23.5	22|2|17|32|35|31|30|26|15|5|23	0	0.69
CG18746	FBgn0042103	CG18746	CG9282	FBgn0032518	RpL24	7	3|0|1|7|7|2|7|1|2|2|2	0	0.61
CG18746	FBgn0042103	CG18746	CG8332	FBgn0034138	RpS15	22	5|1|2|16|12|16|13|3|9|4|5	0	0.59
CG18746	FBgn0042103	CG18746	CG14648	FBgn0263594	lost	13	3|1|13|23|12|3|17|2|0|0|14	0	0.68
CG18746	FBgn0042103	CG18746	CG1101	FBgn0010774	Ref1	4.5	1|0|2|4|4|0|20|0|0|0|8	0	0.66
CG18746	FBgn0042103	CG18746	CG11522	FBgn0039857	RpL6	24	1|0|4|12|12|0|13|0|2|0|4	0	0.52
CG18746	FBgn0042103	CG18746	CG10630	FBgn0035608	blanks	6.5	0|3|10|15|14|0|15|3|0|2|8	0	0.68
CG18746	FBgn0042103	CG18746	CG4254	FBgn0011726	tsr	4.5	4|2|7|16|11|1|30|3|5|0|15	0	0.7
CG18746	FBgn0042103	CG18746	CG7434	FBgn0015288	RpL22	11	6|0|7|7|8|3|13|1|2|0|8	0	0.62
CG18746	FBgn0042103	CG18746	CG18811	FBgn0042134	Capr	3	0|0|0|5|7|0|5|0|0|0|6	0	0.62
CG18746	FBgn0042103	CG18746	CG5787	FBgn0032454	CG5787	29	3|1|1|7|7|0|54|0|0|0|2	0	0.66
CG18746	FBgn0042103	CG18746	CG4211	FBgn0004227	nonA	5	0|0|0|24|14|0|7|0|0|4|8	0	0.68
CG18746	FBgn0042103	CG18746	CG3201	FBgn0004687	Mlc-c	4	10|0|7|1|3|2|8|2|2|1|6	0	0.65
CG18746	FBgn0042103	CG18746	CG1475	FBgn0037351	RpL13A	5	0|0|0|6|5|0|5|0|0|0|2	0	0.58
CG18746	FBgn0042103	CG18746	CG15442	FBgn0285948	RpL27A	6.5	0|0|0|7|7|4|5|0|0|0|2	0	0.59
CG18746	FBgn0042103	CG18746	CG4863	FBgn0020910	RpL3	15	2|0|3|14|10|0|10|0|0|0|5	0	0.62
CG18746	FBgn0042103	CG18746	CG7808	FBgn0039713	RpS8	16.5	6|1|10|13|12|7|10|5|5|6|8	0	0.61
CG18746	FBgn0042103	CG18746	CG4869	FBgn0003890	betaTub97EF	22	13|3|27|45|37|0|35|0|0|0|1	0	0.69
CG18746	FBgn0042103	CG18746	CG1691	FBgn0285926	Imp	18	0|0|0|9|8|0|6|0|0|0|3	0.23	0.31
CG18746	FBgn0042103	CG18746	CG4264	FBgn0266599	Hsc70-4	125	71|17|85|147|159|75|141|61|47|44|93	0	0.69
CG18746	FBgn0042103	CG18746	CG3203	FBgn0029897	RpL17	8	0|0|0|6|5|2|4|0|0|0|1	0	0.48
CG18746	FBgn0042103	CG18746	CG16944	FBgn0003360	sesB	42.5	24|4|25|33|34|26|19|28|33|25|19	0	0.68
CG18746	FBgn0042103	CG18746	CG3379	FBgn0013981	His4r	1.5	2|0|1|0|0|0|3|0|0|0|1	0	0.46
CG18746	FBgn0042103	CG18746	CG6779	FBgn0002622	RpS3	21.5	40|2|33|36|37|36|30|15|31|25|17	0	0.7
CG18746	FBgn0042103	CG18746	CG5827	FBgn0261608	RpL37A	4	1|0|2|2|3|2|3|3|0|0|2	0	0.46
CG18746	FBgn0042103	CG18746	CG1263	FBgn0261602	RpL8	15	3|0|8|6|7|0|16|0|0|0|5	0	0.6
CG18746	FBgn0042103	CG18746	CG4759	FBgn0039359	RpL27	11	0|0|3|5|3|0|12|0|0|0|3	0	0.53
CG18746	FBgn0042103	CG18746	CG4897	FBgn0005593	RpL7	21.5	3|1|4|13|10|2|12|0|0|0|8	0	0.53
CG18746	FBgn0042103	CG18746	CG1913	FBgn0003884	alphaTub84B	15	8|4|13|23|18|14|18|11|12|11|10	0	0.68
CG18746	FBgn0042103	CG18746	CG7283	FBgn0036213	RpL10Ab	29.5	6|1|7|8|9|4|16|3|4|3|8	0.22	0.33
CG18746	FBgn0042103	CG18746	CG3661	FBgn0010078	RpL23	35	38|4|28|52|56|53|46|34|17|9|32	0	0.69
CG18745	FBgn0042102	CG18745	CG3395	FBgn0010408	RpS9	12.5	9|1|8|9|8|7|8|2|4|0|6	0	0.59
CG18745	FBgn0042102	CG18745	CG5502	FBgn0003279	RpL4	17	8|0|10|24|26|3|34|0|0|0|16	0	0.69
CG18745	FBgn0042102	CG18745	CG17870	FBgn0004907	14-3-3zeta	6	5|0|5|20|20|0|27|2|3|0|22	0	0.7
CG18745	FBgn0042102	CG18745	CG15693	FBgn0019936	RpS20	3	10|1|7|10|9|6|8|2|4|2|3	0	0.7
CG18745	FBgn0042102	CG18745	CG7939	FBgn0002626	RpL32	4	2|0|2|2|1|0|2|0|0|0|3	0.17	0.34
CG18745	FBgn0042102	CG18745	CG15697	FBgn0038834	RpS30	2	4|0|3|3|3|2|4|1|1|1|2	0	0.7
CG18745	FBgn0042102	CG18745	CG10811	FBgn0023213	eIF4G1	80	14|5|19|70|75|11|36|7|14|20|30	0	0.69
CG18745	FBgn0042102	CG18745	CG3949	FBgn0015393	hoip	1.5	3|0|2|4|3|2|50|2|2|1|3	0	0.7
CG18745	FBgn0042102	CG18745	CG10944	FBgn0261592	RpS6	7.5	3|0|5|8|7|4|7|5|2|1|5	0	0.61
CG18745	FBgn0042102	CG18745	CG6846	FBgn0036825	RpL26	1	2|0|3|1|3|2|6|0|0|0|5	0	0.7
CG18745	FBgn0042102	CG18745	CG8715	FBgn0020279	lig	14	2|0|11|11|13|1|13|1|0|0|6	0	0.64
CG18745	FBgn0042102	CG18745	CG9946	FBgn0261609	eIF2alpha	6	6|0|9|8|8|6|12|2|0|0|8	0	0.65
CG18745	FBgn0042102	CG18745	CG9412	FBgn0015778	rin	11.5	0|0|5|9|11|0|11|0|2|2|12	0	0.63
CG18745	FBgn0042102	CG18745	CG6995	FBgn0039229	Saf-B	8.5	0|0|0|5|6|0|9|0|0|0|2	0	0.57
CG18745	FBgn0042102	CG18745	CG16901	FBgn0263396	sqd	11.5	2|0|7|7|4|0|8|0|2|2|5	0.01	0.44
CG18745	FBgn0042102	CG18745	CG3401	FBgn0003888	betaTub60D	43.5	64|0|87|80|55|74|52|34|20|22|9	0	0.69
CG18745	FBgn0042102	CG18745	CG1242	FBgn0001233	Hsp83	15.5	15|8|52|81|70|11|79|12|12|9|41	0	0.7
CG18745	FBgn0042102	CG18745	CG10686	FBgn0041775	tral	16	0|0|0|12|13|0|19|0|0|0|5	0	0.66
CG18745	FBgn0042102	CG18745	CG5119	FBgn0265297	pAbp	39.5	10|0|18|39|32|10|28|4|5|6|12	0	0.68
CG18745	FBgn0042102	CG18745	CG1524	FBgn0004403	RpS14a	14	9|0|7|13|13|13|10|9|10|8|7	0	0.65
CG18745	FBgn0042102	CG18745	CG1633	FBgn0040309	Jafrac1	3.5	6|2|8|15|11|2|23|2|2|0|15	0	0.7
CG18745	FBgn0042102	CG18745	CG4046	FBgn0034743	RpS16	18.5	14|0|14|13|16|20|14|10|15|9|12	0	0.67
CG18745	FBgn0042102	CG18745	CG11276	FBgn0011284	RpS4	24.5	11|1|3|29|25|10|22|6|9|5|7	0	0.68
CG18745	FBgn0042102	CG18745	CG12775	FBgn0032987	RpL21	3.5	0|0|3|7|12|2|15|1|4|0|4	0	0.7
CG18745	FBgn0042102	CG18745	CG3314	FBgn0014026	RpL7A	6.5	3|0|6|13|8|0|18|0|0|0|9	0	0.67
CG18745	FBgn0042102	CG18745	CG9641	FBgn0031483	CG9641	1	0|0|0|9|5|0|1|0|0|0|4	0	0.64
CG18745	FBgn0042102	CG18745	CG10203	FBgn0028554	x16	1	0|0|0|4|4|0|2|0|0|0|2	0	0.56
CG18745	FBgn0042102	CG18745	CG8415	FBgn0033912	RpS23	10	6|0|5|10|8|6|11|3|7|1|4	0	0.62
CG18745	FBgn0042102	CG18745	CG7726	FBgn0013325	RpL11	3	2|1|1|3|2|3|4|1|0|0|4	0	0.55
CG18745	FBgn0042102	CG18745	CG10777	FBgn0029979	mahe	13	0|0|0|9|9|0|7|0|0|0|3	0	0.55
CG18745	FBgn0042102	CG18745	CG3922	FBgn0005533	RpS17	11.5	13|0|8|17|13|16|10|7|10|5|3	0	0.67
CG18745	FBgn0042102	CG18745	CG5330	FBgn0015268	Nap1	11	7|0|7|15|7|4|10|2|0|0|4	0	0.63
CG18745	FBgn0042102	CG18745	CG2033	FBgn0010198	RpS15Aa	10.5	5|1|5|11|9|7|6|2|6|3|8	0	0.61
CG18745	FBgn0042102	CG18745	CG10377	FBgn0004838	Hrb27C	3.5	1|1|3|7|1|0|9|0|0|0|1	0	0.61
CG18745	FBgn0042102	CG18745	CG6141	FBgn0015756	RpL9	9.5	2|1|3|5|6|0|5|3|3|0|4	0.01	0.44
CG18745	FBgn0042102	CG18745	CG13389	FBgn0010265	RpS13	7	12|0|7|17|16|13|17|8|6|2|8	0	0.7
CG18745	FBgn0042102	CG18745	CG1821	FBgn0285949	RpL31	3.5	3|0|0|6|4|4|9|3|3|3|6	0	0.64
CG18745	FBgn0042102	CG18745	CG10279	FBgn0003261	Rm62	48.5	5|2|11|40|40|12|33|7|14|7|18	0	0.68
CG18745	FBgn0042102	CG18745	CG9277	FBgn0284243	betaTub56D	52	43|7|70|250|198|71|166|69|35|39|25	0	0.7
CG18745	FBgn0042102	CG18745	CG12740	FBgn0035422	RpL28	2.5	4|0|4|7|6|0|15|0|0|0|6	0	0.7
CG18745	FBgn0042102	CG18745	CG6253	FBgn0017579	RpL14	8.5	6|2|7|10|10|4|13|3|3|3|11	0	0.66
CG18745	FBgn0042102	CG18745	CG11844	FBgn0046214	vig2	10.5	0|1|4|13|16|0|19|0|4|4|8	0	0.67
CG18745	FBgn0042102	CG18745	CG8983	FBgn0033663	ERp60	9	4|5|16|45|36|0|36|3|4|2|24	0	0.7
CG18745	FBgn0042102	CG18745	CG15792	FBgn0265434	zip	29	138|18|165|76|86|16|147|47|5|3|84	0	0.7
CG18745	FBgn0042102	CG18745	CG4027	FBgn0000042	Act5C	91.5	0|22|0|93|85|0|0|60|36|22|78	0	0.69
CG18745	FBgn0042102	CG18745	CG3333	FBgn0259937	Nop60B	6	6|0|3|3|5|0|9|0|3|2|2	0	0.59
CG18745	FBgn0042102	CG18745	CG5519	FBgn0261119	Prp19	5.5	7|0|2|11|11|2|13|0|0|0|3	0	0.67
CG18745	FBgn0042102	CG18745	CG8280	FBgn0284245	eEF1alpha1	28.5	43|3|44|85|87|53|63|34|23|23|48	0	0.7
CG18745	FBgn0042102	CG18745	CG11999	FBgn0037312	CG11999	3.5	7|1|5|49|55|8|23|6|4|7|17	0	0.7
CG18745	FBgn0042102	CG18745	CG10305	FBgn0261597	RpS26	5.5	2|0|3|3|3|4|3|0|0|0|2	0.01	0.43
CG18745	FBgn0042102	CG18745	CG6203	FBgn0028734	Fmr1	11	0|0|0|2|4|0|9|0|0|0|7	0	0.51
CG18745	FBgn0042102	CG18745	CG1883	FBgn0039757	RpS7	12	22|0|12|27|28|36|19|19|13|7|8	0	0.7
CG18745	FBgn0042102	CG18745	CG9916	FBgn0004432	Cyp1	3.5	2|3|12|12|9|0|21|0|4|0|11	0	0.7
CG18745	FBgn0042102	CG18745	CG2998	FBgn0030136	RpS28b	2	3|0|1|2|2|2|4|2|3|2|3	0	0.7
CG18745	FBgn0042102	CG18745	CG2746	FBgn0285950	RpL19	2.5	0|0|0|8|5|0|8|0|0|0|1	0	0.64
CG18745	FBgn0042102	CG18745	CG7977	FBgn0026372	RpL23A	10	10|1|13|8|8|3|36|1|2|0|8	0	0.68
CG18745	FBgn0042102	CG18745	CG7622	FBgn0002579	RpL36	4	0|0|0|5|4|1|8|1|0|0|2	0	0.61
CG18745	FBgn0042102	CG18745	CG10423	FBgn0039300	RpS27	9.5	11|0|10|9|9|13|7|8|5|8|4	0	0.66
CG18745	FBgn0042102	CG18745	CG4035	FBgn0015218	eIF4E1	8	7|0|5|12|9|2|7|0|2|3|5	0	0.64
CG18745	FBgn0042102	CG18745	CG5654	FBgn0022959	yps	26	2|0|7|18|22|0|34|0|3|2|7	0	0.67
CG18745	FBgn0042102	CG18745	CG9983	FBgn0001215	Hrb98DE	13.5	0|0|0|4|5|0|8|0|0|0|2	0.25	0.3
CG18745	FBgn0042102	CG18745	CG8615	FBgn0035753	RpL18	9.5	0|0|6|11|11|2|10|0|0|0|7	0	0.65
CG18745	FBgn0042102	CG18745	CG8900	FBgn0010411	RpS18	18.5	28|2|17|15|11|36|13|8|14|11|11	0	0.68
CG18745	FBgn0042102	CG18745	CG6684	FBgn0086472	RpS25	3.5	7|0|5|6|3|0|9|0|2|2|6	0	0.64
CG18745	FBgn0042102	CG18745	CG10652	FBgn0086710	RpL30	3.5	2|0|3|2|7|1|10|1|1|1|2	0	0.63
CG18745	FBgn0042102	CG18745	CG4147	FBgn0001218	Hsc70-3	34	28|8|40|84|92|42|76|19|25|26|44	0	0.7
CG18745	FBgn0042102	CG18745	CG7439	FBgn0087035	AGO2	21.5	5|0|5|8|4|2|10|3|0|0|2	0.83	0.02
CG18745	FBgn0042102	CG18745	CG3751	FBgn0261596	RpS24	7	0|0|0|4|4|5|3|2|2|1|0	0	0.45
CG18745	FBgn0042102	CG18745	CG3056	FBgn0024987	ssx	5.5	0|0|0|9|9|0|4|0|0|0|3	0	0.62
CG18745	FBgn0042102	CG18745	CG17489	FBgn0064225	RpL5	7	4|0|3|8|12|2|12|0|2|1|6	0	0.66
CG18745	FBgn0042102	CG18745	CG8882	FBgn0015834	eIF3i	10	0|0|0|5|7|0|8|0|0|0|4	0	0.51
CG18745	FBgn0042102	CG18745	CG17521	FBgn0024733	RpL10	3	1|0|2|6|4|0|3|0|0|0|4	0	0.58
CG18745	FBgn0042102	CG18745	CG6143	FBgn0004401	Pep	28.5	9|1|8|21|21|0|72|2|2|0|14	0	0.69
CG18745	FBgn0042102	CG18745	CG9748	FBgn0263231	bel	24.5	4|1|6|39|27|3|18|0|3|8|11	0	0.68
CG18745	FBgn0042102	CG18745	CG6751	FBgn0263510	nclb	1	0|1|3|2|2|0|2|0|0|0|3	0	0.7
CG18745	FBgn0042102	CG18745	CG9862	FBgn0034646	Rae1	1	0|0|0|5|2|0|9|0|0|0|1	0	0.7
CG18745	FBgn0042102	CG18745	CG5920	FBgn0004867	RpS2	22	9|1|8|15|9|6|10|3|5|6|8	0	0.48
CG18745	FBgn0042102	CG18745	CG6341	FBgn0028737	eEF1beta	2.5	7|1|8|11|11|2|12|0|3|0|9	0	0.7
CG18745	FBgn0042102	CG18745	CG4651	FBgn0011272	RpL13	8	5|5|6|9|7|2|13|4|3|0|5	0	0.64
CG18745	FBgn0042102	CG18745	CG2168	FBgn0017545	RpS3A	20.5	22|2|17|32|35|31|30|26|15|5|23	0	0.69
CG18745	FBgn0042102	CG18745	CG7111	FBgn0020618	Rack1	2	0|0|9|7|6|4|7|2|1|4|8	0	0.7
CG18745	FBgn0042102	CG18745	CG9282	FBgn0032518	RpL24	5	3|0|1|7|7|2|7|1|2|2|2	0	0.63
CG18745	FBgn0042102	CG18745	CG8332	FBgn0034138	RpS15	16	5|1|2|16|12|16|13|3|9|4|5	0	0.66
CG18745	FBgn0042102	CG18745	CG14648	FBgn0263594	lost	11.5	3|1|13|23|12|3|17|2|0|0|14	0	0.68
CG18745	FBgn0042102	CG18745	CG1101	FBgn0010774	Ref1	4.5	1|0|2|4|4|0|20|0|0|0|8	0	0.66
CG18745	FBgn0042102	CG18745	CG11522	FBgn0039857	RpL6	6.5	1|0|4|12|12|0|13|0|2|0|4	0	0.66
CG18745	FBgn0042102	CG18745	CG10630	FBgn0035608	blanks	6	0|3|10|15|14|0|15|3|0|2|8	0	0.68
CG18745	FBgn0042102	CG18745	CG4254	FBgn0011726	tsr	4	4|2|7|16|11|1|30|3|5|0|15	0	0.7
CG18745	FBgn0042102	CG18745	CG7434	FBgn0015288	RpL22	8	6|0|7|7|8|3|13|1|2|0|8	0	0.64
CG18745	FBgn0042102	CG18745	CG18811	FBgn0042134	Capr	9.5	0|0|0|5|7|0|5|0|0|0|6	0	0.5
CG18745	FBgn0042102	CG18745	CG5787	FBgn0032454	CG5787	15.5	3|1|1|7|7|0|54|0|0|0|2	0	0.68
CG18745	FBgn0042102	CG18745	CG4211	FBgn0004227	nonA	6.5	0|0|0|24|14|0|7|0|0|4|8	0	0.68
CG18745	FBgn0042102	CG18745	CG3201	FBgn0004687	Mlc-c	3	10|0|7|1|3|2|8|2|2|1|6	0	0.65
CG18745	FBgn0042102	CG18745	CG6946	FBgn0259139	glo	12	0|0|0|9|5|0|5|0|0|0|4	0	0.45
CG18745	FBgn0042102	CG18745	CG1475	FBgn0037351	RpL13A	1.5	0|0|0|6|5|0|5|0|0|0|2	0	0.62
CG18745	FBgn0042102	CG18745	CG15442	FBgn0285948	RpL27A	4.5	0|0|0|7|7|4|5|0|0|0|2	0	0.61
CG18745	FBgn0042102	CG18745	CG4863	FBgn0020910	RpL3	6.5	2|0|3|14|10|0|10|0|0|0|5	0	0.66
CG18745	FBgn0042102	CG18745	CG7808	FBgn0039713	RpS8	17.5	6|1|10|13|12|7|10|5|5|6|8	0	0.6
CG18745	FBgn0042102	CG18745	CG9075	FBgn0001942	eIF4A	1	1|0|6|20|12|1|16|2|0|0|8	0	0.7
CG18745	FBgn0042102	CG18745	CG4869	FBgn0003890	betaTub97EF	14	13|3|27|45|37|0|35|0|0|0|1	0	0.69
CG18745	FBgn0042102	CG18745	CG1691	FBgn0285926	Imp	10	0|0|0|9|8|0|6|0|0|0|3	0	0.59
CG18745	FBgn0042102	CG18745	CG4264	FBgn0266599	Hsc70-4	70.5	71|17|85|147|159|75|141|61|47|44|93	0	0.7
CG18745	FBgn0042102	CG18745	CG3203	FBgn0029897	RpL17	4.5	0|0|0|6|5|2|4|0|0|0|1	0	0.56
CG18745	FBgn0042102	CG18745	CG16944	FBgn0003360	sesB	32.5	24|4|25|33|34|26|19|28|33|25|19	0	0.68
CG18745	FBgn0042102	CG18745	CG6779	FBgn0002622	RpS3	26	40|2|33|36|37|36|30|15|31|25|17	0	0.69
CG18745	FBgn0042102	CG18745	CG5827	FBgn0261608	RpL37A	2.5	1|0|2|2|3|2|3|3|0|0|2	0	0.51
CG18745	FBgn0042102	CG18745	CG1263	FBgn0261602	RpL8	5	3|0|8|6|7|0|16|0|0|0|5	0	0.66
CG18745	FBgn0042102	CG18745	CG4759	FBgn0039359	RpL27	3	0|0|3|5|3|0|12|0|0|0|3	0	0.62
CG18745	FBgn0042102	CG18745	CG4897	FBgn0005593	RpL7	5	3|1|4|13|10|2|12|0|0|0|8	0	0.67
CG18745	FBgn0042102	CG18745	CG1913	FBgn0003884	alphaTub84B	15.5	8|4|13|23|18|14|18|11|12|11|10	0	0.68
CG18745	FBgn0042102	CG18745	CG7283	FBgn0036213	RpL10Ab	10.5	6|1|7|8|9|4|16|3|4|3|8	0	0.65
CG18745	FBgn0042102	CG18745	CG3661	FBgn0010078	RpL23	17	38|4|28|52|56|53|46|34|17|9|32	0	0.7
CG1105	FBgn0037465	CG1105	CG3395	FBgn0010408	RpS9	1	9|1|8|9|8|7|8|2|4|0|6	0	0.7
CG1105	FBgn0037465	CG1105	CG2998	FBgn0030136	RpS28b	1	3|0|1|2|2|2|4|2|3|2|3	0	0.7
CG1105	FBgn0037465	CG1105	CG14648	FBgn0263594	lost	11	3|1|13|23|12|3|17|2|0|0|14	0	0.68
CG1105	FBgn0037465	CG1105	CG1821	FBgn0285949	RpL31	1.5	3|0|0|6|4|4|9|3|3|3|6	0	0.7
CG1105	FBgn0037465	CG1105	CG10811	FBgn0023213	eIF4G1	62	14|5|19|70|75|11|36|7|14|20|30	0	0.69
CG1105	FBgn0037465	CG1105	CG7726	FBgn0013325	RpL11	1.5	2|1|1|3|2|3|4|1|0|0|4	0	0.58
CG1105	FBgn0037465	CG1105	CG7622	FBgn0002579	RpL36	1	0|0|0|5|4|1|8|1|0|0|2	0	0.63
CG1105	FBgn0037465	CG1105	CG9946	FBgn0261609	eIF2alpha	40.5	6|0|9|8|8|6|12|2|0|0|8	1	0
CG1105	FBgn0037465	CG1105	CG1913	FBgn0003884	alphaTub84B	18	8|4|13|23|18|14|18|11|12|11|10	0	0.68
CG1105	FBgn0037465	CG1105	CG17870	FBgn0004907	14-3-3zeta	4	5|0|5|20|20|0|27|2|3|0|22	0	0.7
CG1105	FBgn0037465	CG1105	CG15693	FBgn0019936	RpS20	3	10|1|7|10|9|6|8|2|4|2|3	0	0.7
CG1105	FBgn0037465	CG1105	CG8332	FBgn0034138	RpS15	4.5	5|1|2|16|12|16|13|3|9|4|5	0	0.67
CG1105	FBgn0037465	CG1105	CG10630	FBgn0035608	blanks	8.5	0|3|10|15|14|0|15|3|0|2|8	0	0.67
CG1105	FBgn0037465	CG1105	CG4035	FBgn0015218	eIF4E1	6	7|0|5|12|9|2|7|0|2|3|5	0	0.65
CG1105	FBgn0037465	CG1105	CG5654	FBgn0022959	yps	5	2|0|7|18|22|0|34|0|3|2|7	0	0.7
CG1105	FBgn0037465	CG1105	CG8415	FBgn0033912	RpS23	4	6|0|5|10|8|6|11|3|7|1|4	0	0.7
CG1105	FBgn0037465	CG1105	CG7434	FBgn0015288	RpL22	2.5	6|0|7|7|8|3|13|1|2|0|8	0	0.7
CG1105	FBgn0037465	CG1105	CG3922	FBgn0005533	RpS17	5.5	13|0|8|17|13|16|10|7|10|5|3	0	0.7
CG1105	FBgn0037465	CG1105	CG3949	FBgn0015393	hoip	1	3|0|2|4|3|2|50|2|2|1|3	0	0.7
CG1105	FBgn0037465	CG1105	CG5330	FBgn0015268	Nap1	5	7|0|7|15|7|4|10|2|0|0|4	0	0.66
CG1105	FBgn0037465	CG1105	CG5119	FBgn0265297	pAbp	14.5	10|0|18|39|32|10|28|4|5|6|12	0	0.69
CG1105	FBgn0037465	CG1105	CG8900	FBgn0010411	RpS18	9	28|2|17|15|11|36|13|8|14|11|11	0	0.7
CG1105	FBgn0037465	CG1105	CG6143	FBgn0004401	Pep	1.5	9|1|8|21|21|0|72|2|2|0|14	0	0.7
CG1105	FBgn0037465	CG1105	CG2033	FBgn0010198	RpS15Aa	3.5	5|1|5|11|9|7|6|2|6|3|8	0	0.7
CG1105	FBgn0037465	CG1105	CG8715	FBgn0020279	lig	2.5	2|0|11|11|13|1|13|1|0|0|6	0	0.7
CG1105	FBgn0037465	CG1105	CG6141	FBgn0015756	RpL9	1.5	2|1|3|5|6|0|5|3|3|0|4	0	0.61
CG1105	FBgn0037465	CG1105	CG11999	FBgn0037312	CG11999	5	7|1|5|49|55|8|23|6|4|7|17	0	0.7
CG1105	FBgn0037465	CG1105	CG6946	FBgn0259139	glo	2	0|0|0|9|5|0|5|0|0|0|4	0	0.7
CG1105	FBgn0037465	CG1105	CG13389	FBgn0010265	RpS13	3	12|0|7|17|16|13|17|8|6|2|8	0	0.7
CG1105	FBgn0037465	CG1105	CG5502	FBgn0003279	RpL4	1.5	8|0|10|24|26|3|34|0|0|0|16	0	0.7
CG1105	FBgn0037465	CG1105	CG10305	FBgn0261597	RpS26	1	2|0|3|3|3|4|3|0|0|0|2	0	0.56
CG1105	FBgn0037465	CG1105	CG4147	FBgn0001218	Hsc70-3	51	28|8|40|84|92|42|76|19|25|26|44	0	0.69
CG1105	FBgn0037465	CG1105	CG10944	FBgn0261592	RpS6	1.5	3|0|5|8|7|4|7|5|2|1|5	0	0.7
CG1105	FBgn0037465	CG1105	CG7439	FBgn0087035	AGO2	7.5	5|0|5|8|4|2|10|3|0|0|2	0	0.62
CG1105	FBgn0037465	CG1105	CG10279	FBgn0003261	Rm62	35.5	5|2|11|40|40|12|33|7|14|7|18	0	0.69
CG1105	FBgn0037465	CG1105	CG9277	FBgn0284243	betaTub56D	44.5	43|7|70|250|198|71|166|69|35|39|25	0	0.7
CG1105	FBgn0037465	CG1105	CG3751	FBgn0261596	RpS24	1.5	0|0|0|4|4|5|3|2|2|1|0	0	0.6
CG1105	FBgn0037465	CG1105	CG7808	FBgn0039713	RpS8	3	6|1|10|13|12|7|10|5|5|6|8	0	0.7
CG1105	FBgn0037465	CG1105	CG3661	FBgn0010078	RpL23	24	38|4|28|52|56|53|46|34|17|9|32	0	0.7
CG1105	FBgn0037465	CG1105	CG3056	FBgn0024987	ssx	1	0|0|0|9|9|0|4|0|0|0|3	0	0.7
CG1105	FBgn0037465	CG1105	CG8983	FBgn0033663	ERp60	3	4|5|16|45|36|0|36|3|4|2|24	0	0.7
CG1105	FBgn0037465	CG1105	CG6253	FBgn0017579	RpL14	2	6|2|7|10|10|4|13|3|3|3|11	0	0.7
CG1105	FBgn0037465	CG1105	CG8882	FBgn0015834	eIF3i	2	0|0|0|5|7|0|8|0|0|0|4	0	0.7
CG1105	FBgn0037465	CG1105	CG16944	FBgn0003360	sesB	51.5	24|4|25|33|34|26|19|28|33|25|19	0	0.68
CG1105	FBgn0037465	CG1105	CG9983	FBgn0001215	Hrb98DE	1	0|0|0|4|5|0|8|0|0|0|2	0	0.7
CG1105	FBgn0037465	CG1105	CG11844	FBgn0046214	vig2	2	0|1|4|13|16|0|19|0|4|4|8	0	0.7
CG1105	FBgn0037465	CG1105	CG12055	FBgn0001091	Gapdh1	1	1|0|9|11|8|1|10|1|0|0|5	0	0.7
CG1105	FBgn0037465	CG1105	CG1883	FBgn0039757	RpS7	10.5	22|0|12|27|28|36|19|19|13|7|8	0	0.7
CG1105	FBgn0037465	CG1105	CG16901	FBgn0263396	sqd	6	2|0|7|7|4|0|8|0|2|2|5	0	0.62
CG1105	FBgn0037465	CG1105	CG10423	FBgn0039300	RpS27	7	11|0|10|9|9|13|7|8|5|8|4	0	0.7
CG1105	FBgn0037465	CG1105	CG15792	FBgn0265434	zip	33.5	138|18|165|76|86|16|147|47|5|3|84	0	0.7
CG1105	FBgn0037465	CG1105	CG4254	FBgn0011726	tsr	3.5	4|2|7|16|11|1|30|3|5|0|15	0	0.7
CG1105	FBgn0037465	CG1105	CG3401	FBgn0003888	betaTub60D	30	64|0|87|80|55|74|52|34|20|22|9	0	0.7
CG1105	FBgn0037465	CG1105	CG1242	FBgn0001233	Hsp83	22	15|8|52|81|70|11|79|12|12|9|41	0	0.7
CG1105	FBgn0037465	CG1105	CG4027	FBgn0000042	Act5C	27	0|22|0|93|85|0|0|60|36|22|78	0	0.7
CG1105	FBgn0037465	CG1105	CG4264	FBgn0266599	Hsc70-4	128	71|17|85|147|159|75|141|61|47|44|93	0	0.69
CG1105	FBgn0037465	CG1105	CG3203	FBgn0029897	RpL17	1.5	0|0|0|6|5|2|4|0|0|0|1	0	0.62
CG1105	FBgn0037465	CG1105	CG4869	FBgn0003890	betaTub97EF	15	13|3|27|45|37|0|35|0|0|0|1	0	0.69
CG1105	FBgn0037465	CG1105	CG6779	FBgn0002622	RpS3	11.5	40|2|33|36|37|36|30|15|31|25|17	0	0.7
CG1105	FBgn0037465	CG1105	CG9916	FBgn0004432	Cyp1	15	2|3|12|12|9|0|21|0|4|0|11	0	0.66
CG1105	FBgn0037465	CG1105	CG9748	FBgn0263231	bel	21	4|1|6|39|27|3|18|0|3|8|11	0	0.68
CG1105	FBgn0037465	CG1105	CG3201	FBgn0004687	Mlc-c	2.5	10|0|7|1|3|2|8|2|2|1|6	0	0.7
CG1105	FBgn0037465	CG1105	CG1633	FBgn0040309	Jafrac1	6.5	6|2|8|15|11|2|23|2|2|0|15	0	0.7
CG1105	FBgn0037465	CG1105	CG1524	FBgn0004403	RpS14a	11	9|0|7|13|13|13|10|9|10|8|7	0	0.66
CG1105	FBgn0037465	CG1105	CG9862	FBgn0034646	Rae1	1.5	0|0|0|5|2|0|9|0|0|0|1	0	0.62
CG1105	FBgn0037465	CG1105	CG8280	FBgn0284245	eEF1alpha1	47.5	43|3|44|85|87|53|63|34|23|23|48	0	0.69
CG1105	FBgn0037465	CG1105	CG5920	FBgn0004867	RpS2	5	9|1|8|15|9|6|10|3|5|6|8	0	0.7
CG1105	FBgn0037465	CG1105	CG4046	FBgn0034743	RpS16	6.5	14|0|14|13|16|20|14|10|15|9|12	0	0.7
CG1105	FBgn0037465	CG1105	CG1404	FBgn0020255	Ran	4	2|3|2|16|15|3|32|2|0|0|5	0	0.7
CG1105	FBgn0037465	CG1105	CG1263	FBgn0261602	RpL8	1.5	3|0|8|6|7|0|16|0|0|0|5	0	0.7
CG1105	FBgn0037465	CG1105	CG11276	FBgn0011284	RpS4	8	11|1|3|29|25|10|22|6|9|5|7	0	0.7
CG1105	FBgn0037465	CG1105	CG6341	FBgn0028737	eEF1beta	4.5	7|1|8|11|11|2|12|0|3|0|9	0	0.7
CG1105	FBgn0037465	CG1105	CG2168	FBgn0017545	RpS3A	12	22|2|17|32|35|31|30|26|15|5|23	0	0.7
CG1105	FBgn0037465	CG1105	CG9075	FBgn0001942	eIF4A	3.5	1|0|6|20|12|1|16|2|0|0|8	0	0.7
CG1105	FBgn0037465	CG1105	CG3849	FBgn0063485	Lasp	1.5	0|1|11|8|3|0|14|0|0|0|8	0	0.7
CG1105	FBgn0037465	CG1105	CG3314	FBgn0014026	RpL7A	1	3|0|6|13|8|0|18|0|0|0|9	0	0.7
CG1105	FBgn0037465	CG1105	CG10203	FBgn0028554	x16	1	0|0|0|4|4|0|2|0|0|0|2	0	0.56
CG1105	FBgn0037465	CG1105	CG9282	FBgn0032518	RpL24	2	3|0|1|7|7|2|7|1|2|2|2	0	0.7
CG14696	FBgn0037853	CG14696	CG3395	FBgn0010408	RpS9	3	9|1|8|9|8|7|8|2|4|0|6	0	0.7
CG14696	FBgn0037853	CG14696	CG2998	FBgn0030136	RpS28b	1	3|0|1|2|2|2|4|2|3|2|3	0	0.7
CG14696	FBgn0037853	CG14696	CG14648	FBgn0263594	lost	4.5	3|1|13|23|12|3|17|2|0|0|14	0	0.7
CG14696	FBgn0037853	CG14696	CG10652	FBgn0086710	RpL30	1	2|0|3|2|7|1|10|1|1|1|2	0	0.7
CG14696	FBgn0037853	CG14696	CG8415	FBgn0033912	RpS23	4.5	6|0|5|10|8|6|11|3|7|1|4	0	0.7
CG14696	FBgn0037853	CG14696	CG7726	FBgn0013325	RpL11	2.5	2|1|1|3|2|3|4|1|0|0|4	0	0.55
CG14696	FBgn0037853	CG14696	CG7622	FBgn0002579	RpL36	2	0|0|0|5|4|1|8|1|0|0|2	0	0.62
CG14696	FBgn0037853	CG14696	CG1821	FBgn0285949	RpL31	2	3|0|0|6|4|4|9|3|3|3|6	0	0.7
CG14696	FBgn0037853	CG14696	CG1913	FBgn0003884	alphaTub84B	14.5	8|4|13|23|18|14|18|11|12|11|10	0	0.68
CG14696	FBgn0037853	CG14696	CG15693	FBgn0019936	RpS20	4	10|1|7|10|9|6|8|2|4|2|3	0	0.7
CG14696	FBgn0037853	CG14696	CG8332	FBgn0034138	RpS15	8.5	5|1|2|16|12|16|13|3|9|4|5	0	0.66
CG14696	FBgn0037853	CG14696	CG10630	FBgn0035608	blanks	1.5	0|3|10|15|14|0|15|3|0|2|8	0	0.7
CG14696	FBgn0037853	CG14696	CG4035	FBgn0015218	eIF4E1	3.5	7|0|5|12|9|2|7|0|2|3|5	0	0.7
CG14696	FBgn0037853	CG14696	CG15697	FBgn0038834	RpS30	1.5	4|0|3|3|3|2|4|1|1|1|2	0	0.7
CG14696	FBgn0037853	CG14696	CG10811	FBgn0023213	eIF4G1	30	14|5|19|70|75|11|36|7|14|20|30	0	0.69
CG14696	FBgn0037853	CG14696	CG3922	FBgn0005533	RpS17	7.5	13|0|8|17|13|16|10|7|10|5|3	0	0.7
CG14696	FBgn0037853	CG14696	CG3949	FBgn0015393	hoip	3	3|0|2|4|3|2|50|2|2|1|3	0	0.7
CG14696	FBgn0037853	CG14696	CG5330	FBgn0015268	Nap1	4.5	7|0|7|15|7|4|10|2|0|0|4	0	0.66
CG14696	FBgn0037853	CG14696	CG4863	FBgn0020910	RpL3	1	2|0|3|14|10|0|10|0|0|0|5	0	0.7
CG14696	FBgn0037853	CG14696	CG5119	FBgn0265297	pAbp	9	10|0|18|39|32|10|28|4|5|6|12	0	0.7
CG14696	FBgn0037853	CG14696	CG8900	FBgn0010411	RpS18	9.5	28|2|17|15|11|36|13|8|14|11|11	0	0.7
CG14696	FBgn0037853	CG14696	CG2033	FBgn0010198	RpS15Aa	2	5|1|5|11|9|7|6|2|6|3|8	0	0.7
CG14696	FBgn0037853	CG14696	CG10377	FBgn0004838	Hrb27C	1	1|1|3|7|1|0|9|0|0|0|1	0	0.7
CG14696	FBgn0037853	CG14696	CG6141	FBgn0015756	RpL9	2.5	2|1|3|5|6|0|5|3|3|0|4	0	0.61
CG14696	FBgn0037853	CG14696	CG11999	FBgn0037312	CG11999	6	7|1|5|49|55|8|23|6|4|7|17	0	0.7
CG14696	FBgn0037853	CG14696	CG4337	FBgn0010438	mtSSB	3	23|3|33|3|3|2|8|0|0|0|7	0	0.7
CG14696	FBgn0037853	CG14696	CG13389	FBgn0010265	RpS13	4	12|0|7|17|16|13|17|8|6|2|8	0	0.7
CG14696	FBgn0037853	CG14696	CG9946	FBgn0261609	eIF2alpha	7.5	6|0|9|8|8|6|12|2|0|0|8	0	0.65
CG14696	FBgn0037853	CG14696	CG10305	FBgn0261597	RpS26	2	2|0|3|3|3|4|3|0|0|0|2	0	0.55
CG14696	FBgn0037853	CG14696	CG4147	FBgn0001218	Hsc70-3	64.5	28|8|40|84|92|42|76|19|25|26|44	0	0.69
CG14696	FBgn0037853	CG14696	CG10944	FBgn0261592	RpS6	2	3|0|5|8|7|4|7|5|2|1|5	0	0.7
CG14696	FBgn0037853	CG14696	CG7439	FBgn0087035	AGO2	8.5	5|0|5|8|4|2|10|3|0|0|2	0	0.61
CG14696	FBgn0037853	CG14696	CG10279	FBgn0003261	Rm62	42.5	5|2|11|40|40|12|33|7|14|7|18	0	0.69
CG14696	FBgn0037853	CG14696	CG9277	FBgn0284243	betaTub56D	76.5	43|7|70|250|198|71|166|69|35|39|25	0	0.7
CG14696	FBgn0037853	CG14696	CG3751	FBgn0261596	RpS24	2.5	0|0|0|4|4|5|3|2|2|1|0	0	0.58
CG14696	FBgn0037853	CG14696	CG7808	FBgn0039713	RpS8	2.5	6|1|10|13|12|7|10|5|5|6|8	0	0.7
CG14696	FBgn0037853	CG14696	CG3661	FBgn0010078	RpL23	27	38|4|28|52|56|53|46|34|17|9|32	0	0.7
CG14696	FBgn0037853	CG14696	CG6253	FBgn0017579	RpL14	1	6|2|7|10|10|4|13|3|3|3|11	0	0.7
CG14696	FBgn0037853	CG14696	CG1883	FBgn0039757	RpS7	12.5	22|0|12|27|28|36|19|19|13|7|8	0	0.7
CG14696	FBgn0037853	CG14696	CG8983	FBgn0033663	ERp60	3.5	4|5|16|45|36|0|36|3|4|2|24	0	0.7
CG14696	FBgn0037853	CG14696	CG17489	FBgn0064225	RpL5	1	4|0|3|8|12|2|12|0|2|1|6	0	0.7
CG14696	FBgn0037853	CG14696	CG8615	FBgn0035753	RpL18	2	0|0|6|11|11|2|10|0|0|0|7	0	0.7
CG14696	FBgn0037853	CG14696	CG8882	FBgn0015834	eIF3i	1.5	0|0|0|5|7|0|8|0|0|0|4	0	0.7
CG14696	FBgn0037853	CG14696	CG5654	FBgn0022959	yps	3.5	2|0|7|18|22|0|34|0|3|2|7	0	0.7
CG14696	FBgn0037853	CG14696	CG9983	FBgn0001215	Hrb98DE	2.5	0|0|0|4|5|0|8|0|0|0|2	0	0.62
CG14696	FBgn0037853	CG14696	CG3333	FBgn0259937	Nop60B	2	6|0|3|3|5|0|9|0|3|2|2	0	0.7
CG14696	FBgn0037853	CG14696	CG11844	FBgn0046214	vig2	2.5	0|1|4|13|16|0|19|0|4|4|8	0	0.7
CG14696	FBgn0037853	CG14696	CG4254	FBgn0011726	tsr	2.5	4|2|7|16|11|1|30|3|5|0|15	0	0.7
CG14696	FBgn0037853	CG14696	CG3203	FBgn0029897	RpL17	1.5	0|0|0|6|5|2|4|0|0|0|1	0	0.62
CG14696	FBgn0037853	CG14696	CG16901	FBgn0263396	sqd	7	2|0|7|7|4|0|8|0|2|2|5	0	0.61
CG14696	FBgn0037853	CG14696	CG15792	FBgn0265434	zip	4	138|18|165|76|86|16|147|47|5|3|84	0	0.7
CG14696	FBgn0037853	CG14696	CG4869	FBgn0003890	betaTub97EF	18.5	13|3|27|45|37|0|35|0|0|0|1	0	0.69
CG14696	FBgn0037853	CG14696	CG3401	FBgn0003888	betaTub60D	31.5	64|0|87|80|55|74|52|34|20|22|9	0	0.7
CG14696	FBgn0037853	CG14696	CG2168	FBgn0017545	RpS3A	12	22|2|17|32|35|31|30|26|15|5|23	0	0.7
CG14696	FBgn0037853	CG14696	CG1242	FBgn0001233	Hsp83	16.5	15|8|52|81|70|11|79|12|12|9|41	0	0.7
CG14696	FBgn0037853	CG14696	CG4027	FBgn0000042	Act5C	25	0|22|0|93|85|0|0|60|36|22|78	0	0.7
CG14696	FBgn0037853	CG14696	CG4264	FBgn0266599	Hsc70-4	54.5	71|17|85|147|159|75|141|61|47|44|93	0	0.7
CG14696	FBgn0037853	CG14696	CG9748	FBgn0263231	bel	11.5	4|1|6|39|27|3|18|0|3|8|11	0	0.69
CG14696	FBgn0037853	CG14696	CG16944	FBgn0003360	sesB	37.5	24|4|25|33|34|26|19|28|33|25|19	0	0.68
CG14696	FBgn0037853	CG14696	CG6779	FBgn0002622	RpS3	11.5	40|2|33|36|37|36|30|15|31|25|17	0	0.7
CG14696	FBgn0037853	CG14696	CG15442	FBgn0285948	RpL27A	1.5	0|0|0|7|7|4|5|0|0|0|2	0	0.63
CG14696	FBgn0037853	CG14696	CG9916	FBgn0004432	Cyp1	2	2|3|12|12|9|0|21|0|4|0|11	0	0.7
CG14696	FBgn0037853	CG14696	CG10686	FBgn0041775	tral	1.5	0|0|0|12|13|0|19|0|0|0|5	0	0.7
CG14696	FBgn0037853	CG14696	CG5519	FBgn0261119	Prp19	5.5	7|0|2|11|11|2|13|0|0|0|3	0	0.67
CG14696	FBgn0037853	CG14696	CG5827	FBgn0261608	RpL37A	1	1|0|2|2|3|2|3|3|0|0|2	0	0.54
CG14696	FBgn0037853	CG14696	CG10423	FBgn0039300	RpS27	6	11|0|10|9|9|13|7|8|5|8|4	0	0.7
CG14696	FBgn0037853	CG14696	CG1524	FBgn0004403	RpS14a	9	9|0|7|13|13|13|10|9|10|8|7	0	0.67
CG14696	FBgn0037853	CG14696	CG7434	FBgn0015288	RpL22	2	6|0|7|7|8|3|13|1|2|0|8	0	0.7
CG14696	FBgn0037853	CG14696	CG8280	FBgn0284245	eEF1alpha1	31	43|3|44|85|87|53|63|34|23|23|48	0	0.7
CG14696	FBgn0037853	CG14696	CG5920	FBgn0004867	RpS2	6	9|1|8|15|9|6|10|3|5|6|8	0	0.7
CG14696	FBgn0037853	CG14696	CG4046	FBgn0034743	RpS16	7	14|0|14|13|16|20|14|10|15|9|12	0	0.7
CG14696	FBgn0037853	CG14696	CG1404	FBgn0020255	Ran	4.5	2|3|2|16|15|3|32|2|0|0|5	0	0.7
CG14696	FBgn0037853	CG14696	CG7283	FBgn0036213	RpL10Ab	1	6|1|7|8|9|4|16|3|4|3|8	0	0.7
CG14696	FBgn0037853	CG14696	CG1263	FBgn0261602	RpL8	2	3|0|8|6|7|0|16|0|0|0|5	0	0.7
CG14696	FBgn0037853	CG14696	CG11276	FBgn0011284	RpS4	9	11|1|3|29|25|10|22|6|9|5|7	0	0.7
CG14696	FBgn0037853	CG14696	CG6341	FBgn0028737	eEF1beta	5	7|1|8|11|11|2|12|0|3|0|9	0	0.67
CG14696	FBgn0037853	CG14696	CG12775	FBgn0032987	RpL21	3	0|0|3|7|12|2|15|1|4|0|4	0	0.7
CG14696	FBgn0037853	CG14696	CG9075	FBgn0001942	eIF4A	1.5	1|0|6|20|12|1|16|2|0|0|8	0	0.7
CG14696	FBgn0037853	CG14696	CG9282	FBgn0032518	RpL24	1.5	3|0|1|7|7|2|7|1|2|2|2	0	0.7
CG14696	FBgn0037853	CG14696	CG4897	FBgn0005593	RpL7	3.5	3|1|4|13|10|2|12|0|0|0|8	0	0.7
CG14696	FBgn0037853	CG14696	CG4651	FBgn0011272	RpL13	2	5|5|6|9|7|2|13|4|3|0|5	0	0.7
CG2993	FBgn0037521	CG2993	CG3395	FBgn0010408	RpS9	12	9|1|8|9|8|7|8|2|4|0|6	0	0.59
CG2993	FBgn0037521	CG2993	CG5502	FBgn0003279	RpL4	7.5	8|0|10|24|26|3|34|0|0|0|16	0	0.7
CG2993	FBgn0037521	CG2993	CG7380	FBgn0031977	baf	1	62|3|27|1|1|1|5|4|1|1|3	0	0.7
CG2993	FBgn0037521	CG2993	CG17870	FBgn0004907	14-3-3zeta	5.5	5|0|5|20|20|0|27|2|3|0|22	0	0.7
CG2993	FBgn0037521	CG2993	CG15693	FBgn0019936	RpS20	4	10|1|7|10|9|6|8|2|4|2|3	0	0.7
CG2993	FBgn0037521	CG2993	CG7939	FBgn0002626	RpL32	1.5	2|0|2|2|1|0|2|0|0|0|3	0	0.46
CG2993	FBgn0037521	CG2993	CG15697	FBgn0038834	RpS30	3	4|0|3|3|3|2|4|1|1|1|2	0	0.53
CG2993	FBgn0037521	CG2993	CG10811	FBgn0023213	eIF4G1	47.5	14|5|19|70|75|11|36|7|14|20|30	0	0.69
CG2993	FBgn0037521	CG2993	CG3949	FBgn0015393	hoip	4.5	3|0|2|4|3|2|50|2|2|1|3	0	0.7
CG2993	FBgn0037521	CG2993	CG10944	FBgn0261592	RpS6	6	3|0|5|8|7|4|7|5|2|1|5	0	0.62
CG2993	FBgn0037521	CG2993	CG6846	FBgn0036825	RpL26	5	2|0|3|1|3|2|6|0|0|0|5	0	0.55
CG2993	FBgn0037521	CG2993	CG8715	FBgn0020279	lig	8.5	2|0|11|11|13|1|13|1|0|0|6	0	0.66
CG2993	FBgn0037521	CG2993	CG9946	FBgn0261609	eIF2alpha	22.5	6|0|9|8|8|6|12|2|0|0|8	0.09	0.36
CG2993	FBgn0037521	CG2993	CG9412	FBgn0015778	rin	7.5	0|0|5|9|11|0|11|0|2|2|12	0	0.66
CG2993	FBgn0037521	CG2993	CG16901	FBgn0263396	sqd	6.5	2|0|7|7|4|0|8|0|2|2|5	0	0.62
CG2993	FBgn0037521	CG2993	CG3401	FBgn0003888	betaTub60D	62.5	64|0|87|80|55|74|52|34|20|22|9	0	0.69
CG2993	FBgn0037521	CG2993	CG9916	FBgn0004432	Cyp1	7	2|3|12|12|9|0|21|0|4|0|11	0	0.67
CG2993	FBgn0037521	CG2993	CG10686	FBgn0041775	tral	3.5	0|0|0|12|13|0|19|0|0|0|5	0	0.7
CG2993	FBgn0037521	CG2993	CG5119	FBgn0265297	pAbp	19.5	10|0|18|39|32|10|28|4|5|6|12	0	0.69
CG2993	FBgn0037521	CG2993	CG1524	FBgn0004403	RpS14a	8.5	9|0|7|13|13|13|10|9|10|8|7	0	0.67
CG2993	FBgn0037521	CG2993	CG1633	FBgn0040309	Jafrac1	2.5	6|2|8|15|11|2|23|2|2|0|15	0	0.7
CG2993	FBgn0037521	CG2993	CG4046	FBgn0034743	RpS16	16	14|0|14|13|16|20|14|10|15|9|12	0	0.67
CG2993	FBgn0037521	CG2993	CG11276	FBgn0011284	RpS4	23.5	11|1|3|29|25|10|22|6|9|5|7	0	0.68
CG2993	FBgn0037521	CG2993	CG12775	FBgn0032987	RpL21	3.5	0|0|3|7|12|2|15|1|4|0|4	0	0.7
CG2993	FBgn0037521	CG2993	CG3314	FBgn0014026	RpL7A	2.5	3|0|6|13|8|0|18|0|0|0|9	0	0.7
CG2993	FBgn0037521	CG2993	CG8415	FBgn0033912	RpS23	9.5	6|0|5|10|8|6|11|3|7|1|4	0	0.63
CG2993	FBgn0037521	CG2993	CG7726	FBgn0013325	RpL11	3.5	2|1|1|3|2|3|4|1|0|0|4	0	0.53
CG2993	FBgn0037521	CG2993	CG10777	FBgn0029979	mahe	7	0|0|0|9|9|0|7|0|0|0|3	0	0.63
CG2993	FBgn0037521	CG2993	CG3922	FBgn0005533	RpS17	11	13|0|8|17|13|16|10|7|10|5|3	0	0.67
CG2993	FBgn0037521	CG2993	CG5330	FBgn0015268	Nap1	4	7|0|7|15|7|4|10|2|0|0|4	0	0.7
CG2993	FBgn0037521	CG2993	CG2033	FBgn0010198	RpS15Aa	10.5	5|1|5|11|9|7|6|2|6|3|8	0	0.62
CG2993	FBgn0037521	CG2993	CG10377	FBgn0004838	Hrb27C	2.5	1|1|3|7|1|0|9|0|0|0|1	0	0.61
CG2993	FBgn0037521	CG2993	CG6141	FBgn0015756	RpL9	2.5	2|1|3|5|6|0|5|3|3|0|4	0	0.61
CG2993	FBgn0037521	CG2993	CG2746	FBgn0285950	RpL19	1.5	0|0|0|8|5|0|8|0|0|0|1	0	0.64
CG2993	FBgn0037521	CG2993	CG13389	FBgn0010265	RpS13	9	12|0|7|17|16|13|17|8|6|2|8	0	0.68
CG2993	FBgn0037521	CG2993	CG1821	FBgn0285949	RpL31	3.5	3|0|0|6|4|4|9|3|3|3|6	0	0.64
CG2993	FBgn0037521	CG2993	CG10279	FBgn0003261	Rm62	17	5|2|11|40|40|12|33|7|14|7|18	0	0.7
CG2993	FBgn0037521	CG2993	CG9277	FBgn0284243	betaTub56D	156	43|7|70|250|198|71|166|69|35|39|25	0	0.7
CG2993	FBgn0037521	CG2993	CG12740	FBgn0035422	RpL28	1	4|0|4|7|6|0|15|0|0|0|6	0	0.7
CG2993	FBgn0037521	CG2993	CG6253	FBgn0017579	RpL14	4	6|2|7|10|10|4|13|3|3|3|11	0	0.7
CG2993	FBgn0037521	CG2993	CG11844	FBgn0046214	vig2	8.5	0|1|4|13|16|0|19|0|4|4|8	0	0.68
CG2993	FBgn0037521	CG2993	CG8983	FBgn0033663	ERp60	8	4|5|16|45|36|0|36|3|4|2|24	0	0.7
CG2993	FBgn0037521	CG2993	CG15792	FBgn0265434	zip	14.5	138|18|165|76|86|16|147|47|5|3|84	0	0.7
CG2993	FBgn0037521	CG2993	CG3333	FBgn0259937	Nop60B	4.5	6|0|3|3|5|0|9|0|3|2|2	0	0.62
CG2993	FBgn0037521	CG2993	CG5519	FBgn0261119	Prp19	7	7|0|2|11|11|2|13|0|0|0|3	0	0.66
CG2993	FBgn0037521	CG2993	CG8280	FBgn0284245	eEF1alpha1	32.5	43|3|44|85|87|53|63|34|23|23|48	0	0.7
CG2993	FBgn0037521	CG2993	CG11999	FBgn0037312	CG11999	10.5	7|1|5|49|55|8|23|6|4|7|17	0	0.7
CG2993	FBgn0037521	CG2993	CG10305	FBgn0261597	RpS26	2	2|0|3|3|3|4|3|0|0|0|2	0	0.54
CG2993	FBgn0037521	CG2993	CG9075	FBgn0001942	eIF4A	2	1|0|6|20|12|1|16|2|0|0|8	0	0.7
CG2993	FBgn0037521	CG2993	CG2998	FBgn0030136	RpS28b	3	3|0|1|2|2|2|4|2|3|2|3	0	0.52
CG2993	FBgn0037521	CG2993	CG9862	FBgn0034646	Rae1	1	0|0|0|5|2|0|9|0|0|0|1	0	0.7
CG2993	FBgn0037521	CG2993	CG7977	FBgn0026372	RpL23A	6.5	10|1|13|8|8|3|36|1|2|0|8	0	0.7
CG2993	FBgn0037521	CG2993	CG7622	FBgn0002579	RpL36	1.5	0|0|0|5|4|1|8|1|0|0|2	0	0.63
CG2993	FBgn0037521	CG2993	CG10423	FBgn0039300	RpS27	8.5	11|0|10|9|9|13|7|8|5|8|4	0	0.66
CG2993	FBgn0037521	CG2993	CG4035	FBgn0015218	eIF4E1	8.5	7|0|5|12|9|2|7|0|2|3|5	0	0.63
CG2993	FBgn0037521	CG2993	CG5654	FBgn0022959	yps	6.5	2|0|7|18|22|0|34|0|3|2|7	0	0.69
CG2993	FBgn0037521	CG2993	CG9983	FBgn0001215	Hrb98DE	1	0|0|0|4|5|0|8|0|0|0|2	0	0.7
CG2993	FBgn0037521	CG2993	CG8615	FBgn0035753	RpL18	3	0|0|6|11|11|2|10|0|0|0|7	0	0.7
CG2993	FBgn0037521	CG2993	CG8900	FBgn0010411	RpS18	15	28|2|17|15|11|36|13|8|14|11|11	0	0.7
CG2993	FBgn0037521	CG2993	CG6684	FBgn0086472	RpS25	2	7|0|5|6|3|0|9|0|2|2|6	0	0.7
CG2993	FBgn0037521	CG2993	CG4337	FBgn0010438	mtSSB	3.5	23|3|33|3|3|2|8|0|0|0|7	0	0.7
CG2993	FBgn0037521	CG2993	CG10652	FBgn0086710	RpL30	1	2|0|3|2|7|1|10|1|1|1|2	0	0.7
CG2993	FBgn0037521	CG2993	CG4147	FBgn0001218	Hsc70-3	53.5	28|8|40|84|92|42|76|19|25|26|44	0	0.69
CG2993	FBgn0037521	CG2993	CG7439	FBgn0087035	AGO2	16	5|0|5|8|4|2|10|3|0|0|2	0.01	0.44
CG2993	FBgn0037521	CG2993	CG3751	FBgn0261596	RpS24	4	0|0|0|4|4|5|3|2|2|1|0	0	0.56
CG2993	FBgn0037521	CG2993	CG1883	FBgn0039757	RpS7	16	22|0|12|27|28|36|19|19|13|7|8	0	0.7
CG2993	FBgn0037521	CG2993	CG17489	FBgn0064225	RpL5	2	4|0|3|8|12|2|12|0|2|1|6	0	0.7
CG2993	FBgn0037521	CG2993	CG8882	FBgn0015834	eIF3i	4.5	0|0|0|5|7|0|8|0|0|0|4	0	0.62
CG2993	FBgn0037521	CG2993	CG17521	FBgn0024733	RpL10	3	1|0|2|6|4|0|3|0|0|0|4	0	0.59
CG2993	FBgn0037521	CG2993	CG6143	FBgn0004401	Pep	10.5	9|1|8|21|21|0|72|2|2|0|14	0	0.7
CG2993	FBgn0037521	CG2993	CG9748	FBgn0263231	bel	28	4|1|6|39|27|3|18|0|3|8|11	0	0.68
CG2993	FBgn0037521	CG2993	CG1242	FBgn0001233	Hsp83	35	15|8|52|81|70|11|79|12|12|9|41	0	0.69
CG2993	FBgn0037521	CG2993	CG7434	FBgn0015288	RpL22	2.5	6|0|7|7|8|3|13|1|2|0|8	0	0.7
CG2993	FBgn0037521	CG2993	CG5920	FBgn0004867	RpS2	17.5	9|1|8|15|9|6|10|3|5|6|8	0	0.57
CG2993	FBgn0037521	CG2993	CG1404	FBgn0020255	Ran	3	2|3|2|16|15|3|32|2|0|0|5	0	0.7
CG2993	FBgn0037521	CG2993	CG6341	FBgn0028737	eEF1beta	3	7|1|8|11|11|2|12|0|3|0|9	0	0.7
CG2993	FBgn0037521	CG2993	CG4651	FBgn0011272	RpL13	1.5	5|5|6|9|7|2|13|4|3|0|5	0	0.7
CG2993	FBgn0037521	CG2993	CG2168	FBgn0017545	RpS3A	15	22|2|17|32|35|31|30|26|15|5|23	0	0.7
CG2993	FBgn0037521	CG2993	CG7111	FBgn0020618	Rack1	2	0|0|9|7|6|4|7|2|1|4|8	0	0.7
CG2993	FBgn0037521	CG2993	CG9282	FBgn0032518	RpL24	4	3|0|1|7|7|2|7|1|2|2|2	0	0.63
CG2993	FBgn0037521	CG2993	CG8332	FBgn0034138	RpS15	19.5	5|1|2|16|12|16|13|3|9|4|5	0	0.63
CG2993	FBgn0037521	CG2993	CG14648	FBgn0263594	lost	7	3|1|13|23|12|3|17|2|0|0|14	0	0.7
CG2993	FBgn0037521	CG2993	CG11522	FBgn0039857	RpL6	2.5	1|0|4|12|12|0|13|0|2|0|4	0	0.7
CG2993	FBgn0037521	CG2993	CG10630	FBgn0035608	blanks	7	0|3|10|15|14|0|15|3|0|2|8	0	0.68
CG2993	FBgn0037521	CG2993	CG4254	FBgn0011726	tsr	4	4|2|7|16|11|1|30|3|5|0|15	0	0.7
CG2993	FBgn0037521	CG2993	CG18811	FBgn0042134	Capr	4.5	0|0|0|5|7|0|5|0|0|0|6	0	0.61
CG2993	FBgn0037521	CG2993	CG5787	FBgn0032454	CG5787	3.5	3|1|1|7|7|0|54|0|0|0|2	0	0.7
CG2993	FBgn0037521	CG2993	CG4211	FBgn0004227	nonA	4	0|0|0|24|14|0|7|0|0|4|8	0	0.7
CG2993	FBgn0037521	CG2993	CG3201	FBgn0004687	Mlc-c	3	10|0|7|1|3|2|8|2|2|1|6	0	0.65
CG2993	FBgn0037521	CG2993	CG15442	FBgn0285948	RpL27A	3	0|0|0|7|7|4|5|0|0|0|2	0	0.63
CG2993	FBgn0037521	CG2993	CG4863	FBgn0020910	RpL3	1.5	2|0|3|14|10|0|10|0|0|0|5	0	0.7
CG2993	FBgn0037521	CG2993	CG7808	FBgn0039713	RpS8	12	6|1|10|13|12|7|10|5|5|6|8	0	0.65
CG2993	FBgn0037521	CG2993	CG4869	FBgn0003890	betaTub97EF	26.5	13|3|27|45|37|0|35|0|0|0|1	0	0.69
CG2993	FBgn0037521	CG2993	CG1691	FBgn0285926	Imp	1	0|0|0|9|8|0|6|0|0|0|3	0	0.7
CG2993	FBgn0037521	CG2993	CG4264	FBgn0266599	Hsc70-4	174.5	71|17|85|147|159|75|141|61|47|44|93	0	0.69
CG2993	FBgn0037521	CG2993	CG3203	FBgn0029897	RpL17	4	0|0|0|6|5|2|4|0|0|0|1	0	0.59
CG2993	FBgn0037521	CG2993	CG16944	FBgn0003360	sesB	42	24|4|25|33|34|26|19|28|33|25|19	0	0.68
CG2993	FBgn0037521	CG2993	CG3379	FBgn0013981	His4r	1	2|0|1|0|0|0|3|0|0|0|1	0	0.7
CG2993	FBgn0037521	CG2993	CG6779	FBgn0002622	RpS3	45.5	40|2|33|36|37|36|30|15|31|25|17	0	0.68
CG2993	FBgn0037521	CG2993	CG5827	FBgn0261608	RpL37A	1	1|0|2|2|3|2|3|3|0|0|2	0	0.7
CG2993	FBgn0037521	CG2993	CG1263	FBgn0261602	RpL8	1.5	3|0|8|6|7|0|16|0|0|0|5	0	0.7
CG2993	FBgn0037521	CG2993	CG4759	FBgn0039359	RpL27	1.5	0|0|3|5|3|0|12|0|0|0|3	0	0.7
CG2993	FBgn0037521	CG2993	CG4897	FBgn0005593	RpL7	2.5	3|1|4|13|10|2|12|0|0|0|8	0	0.7
CG2993	FBgn0037521	CG2993	CG1913	FBgn0003884	alphaTub84B	19.5	8|4|13|23|18|14|18|11|12|11|10	0	0.67
CG2993	FBgn0037521	CG2993	CG7283	FBgn0036213	RpL10Ab	6.5	6|1|7|8|9|4|16|3|4|3|8	0	0.66
CG2993	FBgn0037521	CG2993	CG3661	FBgn0010078	RpL23	14	38|4|28|52|56|53|46|34|17|9|32	0	0.7
CG10086	FBgn0037517	CG10086	CG3395	FBgn0010408	RpS9	26.5	9|1|8|9|8|7|8|2|4|0|6	0.8	0.02
CG10086	FBgn0037517	CG10086	CG5502	FBgn0003279	RpL4	44.5	8|0|10|24|26|3|34|0|0|0|16	0	0.66
CG10086	FBgn0037517	CG10086	CG17870	FBgn0004907	14-3-3zeta	7.5	5|0|5|20|20|0|27|2|3|0|22	0	0.7
CG10086	FBgn0037517	CG10086	CG15693	FBgn0019936	RpS20	10.5	10|1|7|10|9|6|8|2|4|2|3	0	0.62
CG10086	FBgn0037517	CG10086	CG7939	FBgn0002626	RpL32	9	2|0|2|2|1|0|2|0|0|0|3	0.66	0.04
CG10086	FBgn0037517	CG10086	CG15697	FBgn0038834	RpS30	3.5	4|0|3|3|3|2|4|1|1|1|2	0	0.53
CG10086	FBgn0037517	CG10086	CG10811	FBgn0023213	eIF4G1	78.5	14|5|19|70|75|11|36|7|14|20|30	0	0.69
CG10086	FBgn0037517	CG10086	CG3949	FBgn0015393	hoip	6	3|0|2|4|3|2|50|2|2|1|3	0	0.68
CG10086	FBgn0037517	CG10086	CG10944	FBgn0261592	RpS6	18	3|0|5|8|7|4|7|5|2|1|5	0.23	0.31
CG10086	FBgn0037517	CG10086	CG6846	FBgn0036825	RpL26	12.5	2|0|3|1|3|2|6|0|0|0|5	0.5	0.12
CG10086	FBgn0037517	CG10086	CG8715	FBgn0020279	lig	13.5	2|0|11|11|13|1|13|1|0|0|6	0	0.63
CG10086	FBgn0037517	CG10086	CG9946	FBgn0261609	eIF2alpha	11	6|0|9|8|8|6|12|2|0|0|8	0	0.61
CG10086	FBgn0037517	CG10086	CG9412	FBgn0015778	rin	30.5	0|0|5|9|11|0|11|0|2|2|12	0.56	0.06
CG10086	FBgn0037517	CG10086	CG6995	FBgn0039229	Saf-B	12	0|0|0|5|6|0|9|0|0|0|2	0.01	0.45
CG10086	FBgn0037517	CG10086	CG16901	FBgn0263396	sqd	16.5	2|0|7|7|4|0|8|0|2|2|5	0.03	0.4
CG10086	FBgn0037517	CG10086	CG3401	FBgn0003888	betaTub60D	45.5	64|0|87|80|55|74|52|34|20|22|9	0	0.69
CG10086	FBgn0037517	CG10086	CG1242	FBgn0001233	Hsp83	45	15|8|52|81|70|11|79|12|12|9|41	0	0.69
CG10086	FBgn0037517	CG10086	CG10686	FBgn0041775	tral	61.5	0|0|0|12|13|0|19|0|0|0|5	1	0
CG10086	FBgn0037517	CG10086	CG5119	FBgn0265297	pAbp	49	10|0|18|39|32|10|28|4|5|6|12	0	0.68
CG10086	FBgn0037517	CG10086	CG1524	FBgn0004403	RpS14a	18	9|0|7|13|13|13|10|9|10|8|7	0	0.64
CG10086	FBgn0037517	CG10086	CG1633	FBgn0040309	Jafrac1	1.5	6|2|8|15|11|2|23|2|2|0|15	0	0.7
CG10086	FBgn0037517	CG10086	CG4046	FBgn0034743	RpS16	23	14|0|14|13|16|20|14|10|15|9|12	0	0.66
CG10086	FBgn0037517	CG10086	CG11276	FBgn0011284	RpS4	49.5	11|1|3|29|25|10|22|6|9|5|7	0	0.62
CG10086	FBgn0037517	CG10086	CG12775	FBgn0032987	RpL21	13	0|0|3|7|12|2|15|1|4|0|4	0	0.64
CG10086	FBgn0037517	CG10086	CG3314	FBgn0014026	RpL7A	18	3|0|6|13|8|0|18|0|0|0|9	0	0.62
CG10086	FBgn0037517	CG10086	CG10203	FBgn0028554	x16	2	0|0|0|4|4|0|2|0|0|0|2	0	0.54
CG10086	FBgn0037517	CG10086	CG8415	FBgn0033912	RpS23	17.5	6|0|5|10|8|6|11|3|7|1|4	0	0.55
CG10086	FBgn0037517	CG10086	CG7726	FBgn0013325	RpL11	4.5	2|1|1|3|2|3|4|1|0|0|4	0	0.47
CG10086	FBgn0037517	CG10086	CG10777	FBgn0029979	mahe	92	0|0|0|9|9|0|7|0|0|0|3	1	0
CG10086	FBgn0037517	CG10086	CG3922	FBgn0005533	RpS17	19	13|0|8|17|13|16|10|7|10|5|3	0	0.66
CG10086	FBgn0037517	CG10086	CG5330	FBgn0015268	Nap1	21.5	7|0|7|15|7|4|10|2|0|0|4	0.01	0.45
CG10086	FBgn0037517	CG10086	CG2033	FBgn0010198	RpS15Aa	16	5|1|5|11|9|7|6|2|6|3|8	0	0.56
CG10086	FBgn0037517	CG10086	CG10377	FBgn0004838	Hrb27C	5	1|1|3|7|1|0|9|0|0|0|1	0	0.6
CG10086	FBgn0037517	CG10086	CG6141	FBgn0015756	RpL9	22	2|1|3|5|6|0|5|3|3|0|4	1	0
CG10086	FBgn0037517	CG10086	CG13389	FBgn0010265	RpS13	19	12|0|7|17|16|13|17|8|6|2|8	0	0.66
CG10086	FBgn0037517	CG10086	CG1821	FBgn0285949	RpL31	4	3|0|0|6|4|4|9|3|3|3|6	0	0.63
CG10086	FBgn0037517	CG10086	CG10279	FBgn0003261	Rm62	70	5|2|11|40|40|12|33|7|14|7|18	0	0.63
CG10086	FBgn0037517	CG10086	CG9277	FBgn0284243	betaTub56D	46	43|7|70|250|198|71|166|69|35|39|25	0	0.7
CG10086	FBgn0037517	CG10086	CG12740	FBgn0035422	RpL28	13	4|0|4|7|6|0|15|0|0|0|6	0	0.6
CG10086	FBgn0037517	CG10086	CG6253	FBgn0017579	RpL14	29.5	6|2|7|10|10|4|13|3|3|3|11	0.5	0.08
CG10086	FBgn0037517	CG10086	CG11844	FBgn0046214	vig2	22	0|1|4|13|16|0|19|0|4|4|8	0	0.64
CG10086	FBgn0037517	CG10086	CG8983	FBgn0033663	ERp60	6.5	4|5|16|45|36|0|36|3|4|2|24	0	0.7
CG10086	FBgn0037517	CG10086	CG15792	FBgn0265434	zip	167.5	138|18|165|76|86|16|147|47|5|3|84	0	0.69
CG10086	FBgn0037517	CG10086	CG17420	FBgn0028697	RpL15	4	0|0|4|3|3|0|4|0|0|0|2	0	0.5
CG10086	FBgn0037517	CG10086	CG3333	FBgn0259937	Nop60B	18.5	6|0|3|3|5|0|9|0|3|2|2	0.64	0.04
CG10086	FBgn0037517	CG10086	CG5519	FBgn0261119	Prp19	14	7|0|2|11|11|2|13|0|0|0|3	0	0.64
CG10086	FBgn0037517	CG10086	CG8280	FBgn0284245	eEF1alpha1	43.5	43|3|44|85|87|53|63|34|23|23|48	0	0.69
CG10086	FBgn0037517	CG10086	CG11999	FBgn0037312	CG11999	18.5	7|1|5|49|55|8|23|6|4|7|17	0	0.69
CG10086	FBgn0037517	CG10086	CG10305	FBgn0261597	RpS26	5	2|0|3|3|3|4|3|0|0|0|2	0	0.45
CG10086	FBgn0037517	CG10086	CG6203	FBgn0028734	Fmr1	62.5	0|0|0|2|4|0|9|0|0|0|7	1	0
CG10086	FBgn0037517	CG10086	CG9075	FBgn0001942	eIF4A	2	1|0|6|20|12|1|16|2|0|0|8	0	0.7
CG10086	FBgn0037517	CG10086	CG9916	FBgn0004432	Cyp1	4.5	2|3|12|12|9|0|21|0|4|0|11	0	0.7
CG10086	FBgn0037517	CG10086	CG2998	FBgn0030136	RpS28b	4.5	3|0|1|2|2|2|4|2|3|2|3	0	0.47
CG10086	FBgn0037517	CG10086	CG2746	FBgn0285950	RpL19	11.5	0|0|0|8|5|0|8|0|0|0|1	0	0.53
CG10086	FBgn0037517	CG10086	CG7977	FBgn0026372	RpL23A	20.5	10|1|13|8|8|3|36|1|2|0|8	0	0.67
CG10086	FBgn0037517	CG10086	CG7622	FBgn0002579	RpL36	11	0|0|0|5|4|1|8|1|0|0|2	0.01	0.43
CG10086	FBgn0037517	CG10086	CG10423	FBgn0039300	RpS27	8.5	11|0|10|9|9|13|7|8|5|8|4	0	0.66
CG10086	FBgn0037517	CG10086	CG4035	FBgn0015218	eIF4E1	14	7|0|5|12|9|2|7|0|2|3|5	0	0.59
CG10086	FBgn0037517	CG10086	CG5654	FBgn0022959	yps	56	2|0|7|18|22|0|34|0|3|2|7	0	0.46
CG10086	FBgn0037517	CG10086	CG9983	FBgn0001215	Hrb98DE	15.5	0|0|0|4|5|0|8|0|0|0|2	0.63	0.05
CG10086	FBgn0037517	CG10086	CG8615	FBgn0035753	RpL18	21.5	0|0|6|11|11|2|10|0|0|0|7	0	0.49
CG10086	FBgn0037517	CG10086	CG8900	FBgn0010411	RpS18	19.5	28|2|17|15|11|36|13|8|14|11|11	0	0.68
CG10086	FBgn0037517	CG10086	CG42648	FBgn0285951	mRpS34	2	0|0|0|1|3|0|4|0|0|0|0	0	0.49
CG10086	FBgn0037517	CG10086	CG6684	FBgn0086472	RpS25	9	7|0|5|6|3|0|9|0|2|2|6	0	0.59
CG10086	FBgn0037517	CG10086	CG4337	FBgn0010438	mtSSB	5.5	23|3|33|3|3|2|8|0|0|0|7	0	0.7
CG10086	FBgn0037517	CG10086	CG10652	FBgn0086710	RpL30	8.5	2|0|3|2|7|1|10|1|1|1|2	0	0.57
CG10086	FBgn0037517	CG10086	CG4147	FBgn0001218	Hsc70-3	55.5	28|8|40|84|92|42|76|19|25|26|44	0	0.69
CG10086	FBgn0037517	CG10086	CG7439	FBgn0087035	AGO2	80	5|0|5|8|4|2|10|3|0|0|2	1	0
CG10086	FBgn0037517	CG10086	CG3751	FBgn0261596	RpS24	7	0|0|0|4|4|5|3|2|2|1|0	0	0.45
CG10086	FBgn0037517	CG10086	CG3056	FBgn0024987	ssx	6.5	0|0|0|9|9|0|4|0|0|0|3	0	0.62
CG10086	FBgn0037517	CG10086	CG17489	FBgn0064225	RpL5	21	4|0|3|8|12|2|12|0|2|1|6	0	0.52
CG10086	FBgn0037517	CG10086	CG8882	FBgn0015834	eIF3i	14	0|0|0|5|7|0|8|0|0|0|4	0.02	0.42
CG10086	FBgn0037517	CG10086	CG17521	FBgn0024733	RpL10	3	1|0|2|6|4|0|3|0|0|0|4	0	0.59
CG10086	FBgn0037517	CG10086	CG6143	FBgn0004401	Pep	51	9|1|8|21|21|0|72|2|2|0|14	0	0.68
CG10086	FBgn0037517	CG10086	CG9748	FBgn0263231	bel	28	4|1|6|39|27|3|18|0|3|8|11	0	0.68
CG10086	FBgn0037517	CG10086	CG6751	FBgn0263510	nclb	3.5	0|1|3|2|2|0|2|0|0|0|3	0.01	0.44
CG10086	FBgn0037517	CG10086	CG4679	FBgn0033816	CG4679	3.5	0|0|0|4|2|0|2|0|0|0|1	0.01	0.44
CG10086	FBgn0037517	CG10086	CG1883	FBgn0039757	RpS7	14.5	22|0|12|27|28|36|19|19|13|7|8	0	0.7
CG10086	FBgn0037517	CG10086	CG5920	FBgn0004867	RpS2	31	9|1|8|15|9|6|10|3|5|6|8	0.52	0.07
CG10086	FBgn0037517	CG10086	CG1404	FBgn0020255	Ran	5	2|3|2|16|15|3|32|2|0|0|5	0	0.7
CG10086	FBgn0037517	CG10086	CG6341	FBgn0028737	eEF1beta	6.5	7|1|8|11|11|2|12|0|3|0|9	0	0.66
CG10086	FBgn0037517	CG10086	CG4651	FBgn0011272	RpL13	16.5	5|5|6|9|7|2|13|4|3|0|5	0	0.53
CG10086	FBgn0037517	CG10086	CG2168	FBgn0017545	RpS3A	42.5	22|2|17|32|35|31|30|26|15|5|23	0	0.68
CG10086	FBgn0037517	CG10086	CG7111	FBgn0020618	Rack1	5	0|0|9|7|6|4|7|2|1|4|8	0	0.62
CG10086	FBgn0037517	CG10086	CG9282	FBgn0032518	RpL24	16	3|0|1|7|7|2|7|1|2|2|2	0.19	0.33
CG10086	FBgn0037517	CG10086	CG8332	FBgn0034138	RpS15	28	5|1|2|16|12|16|13|3|9|4|5	0	0.58
CG10086	FBgn0037517	CG10086	CG14648	FBgn0263594	lost	16	3|1|13|23|12|3|17|2|0|0|14	0	0.67
CG10086	FBgn0037517	CG10086	CG1101	FBgn0010774	Ref1	7	1|0|2|4|4|0|20|0|0|0|8	0	0.66
CG10086	FBgn0037517	CG10086	CG11522	FBgn0039857	RpL6	16.5	1|0|4|12|12|0|13|0|2|0|4	0	0.63
CG10086	FBgn0037517	CG10086	CG10630	FBgn0035608	blanks	8.5	0|3|10|15|14|0|15|3|0|2|8	0	0.67
CG10086	FBgn0037517	CG10086	CG4254	FBgn0011726	tsr	3	4|2|7|16|11|1|30|3|5|0|15	0	0.7
CG10086	FBgn0037517	CG10086	CG7434	FBgn0015288	RpL22	19	6|0|7|7|8|3|13|1|2|0|8	0	0.5
CG10086	FBgn0037517	CG10086	CG18811	FBgn0042134	Capr	32.5	0|0|0|5|7|0|5|0|0|0|6	1	0
CG10086	FBgn0037517	CG10086	CG5787	FBgn0032454	CG5787	31	3|1|1|7|7|0|54|0|0|0|2	0	0.67
CG10086	FBgn0037517	CG10086	CG4211	FBgn0004227	nonA	22	0|0|0|24|14|0|7|0|0|4|8	0	0.63
CG10086	FBgn0037517	CG10086	CG3201	FBgn0004687	Mlc-c	6.5	10|0|7|1|3|2|8|2|2|1|6	0	0.64
CG10086	FBgn0037517	CG10086	CG6946	FBgn0259139	glo	15	0|0|0|9|5|0|5|0|0|0|4	0.16	0.34
CG10086	FBgn0037517	CG10086	CG1475	FBgn0037351	RpL13A	7	0|0|0|6|5|0|5|0|0|0|2	0	0.55
CG10086	FBgn0037517	CG10086	CG15442	FBgn0285948	RpL27A	7.5	0|0|0|7|7|4|5|0|0|0|2	0	0.58
CG10086	FBgn0037517	CG10086	CG4863	FBgn0020910	RpL3	18.5	2|0|3|14|10|0|10|0|0|0|5	0	0.57
CG10086	FBgn0037517	CG10086	CG7808	FBgn0039713	RpS8	25	6|1|10|13|12|7|10|5|5|6|8	0.2	0.33
CG10086	FBgn0037517	CG10086	CG4869	FBgn0003890	betaTub97EF	8.5	13|3|27|45|37|0|35|0|0|0|1	0	0.69
CG10086	FBgn0037517	CG10086	CG1691	FBgn0285926	Imp	23.5	0|0|0|9|8|0|6|0|0|0|3	0.6	0.05
CG10086	FBgn0037517	CG10086	CG4264	FBgn0266599	Hsc70-4	125.5	71|17|85|147|159|75|141|61|47|44|93	0	0.69
CG10086	FBgn0037517	CG10086	CG3203	FBgn0029897	RpL17	5	0|0|0|6|5|2|4|0|0|0|1	0	0.56
CG10086	FBgn0037517	CG10086	CG16944	FBgn0003360	sesB	28.5	24|4|25|33|34|26|19|28|33|25|19	0	0.69
CG10086	FBgn0037517	CG10086	CG3379	FBgn0013981	His4r	1.5	2|0|1|0|0|0|3|0|0|0|1	0	0.46
CG10086	FBgn0037517	CG10086	CG4898	FBgn0003721	Tm1	2	15|0|5|4|0|0|17|0|0|0|19	0	0.7
CG10086	FBgn0037517	CG10086	CG6779	FBgn0002622	RpS3	46.5	40|2|33|36|37|36|30|15|31|25|17	0	0.68
CG10086	FBgn0037517	CG10086	CG5827	FBgn0261608	RpL37A	3.5	1|0|2|2|3|2|3|3|0|0|2	0	0.47
CG10086	FBgn0037517	CG10086	CG1263	FBgn0261602	RpL8	11.5	3|0|8|6|7|0|16|0|0|0|5	0	0.63
CG10086	FBgn0037517	CG10086	CG4759	FBgn0039359	RpL27	8	0|0|3|5|3|0|12|0|0|0|3	0	0.58
CG10086	FBgn0037517	CG10086	CG4897	FBgn0005593	RpL7	16.5	3|1|4|13|10|2|12|0|0|0|8	0	0.61
CG10086	FBgn0037517	CG10086	CG1913	FBgn0003884	alphaTub84B	13.5	8|4|13|23|18|14|18|11|12|11|10	0	0.68
CG10086	FBgn0037517	CG10086	CG7283	FBgn0036213	RpL10Ab	36	6|1|7|8|9|4|16|3|4|3|8	0.65	0.04
CG10086	FBgn0037517	CG10086	CG3661	FBgn0010078	RpL23	39.5	38|4|28|52|56|53|46|34|17|9|32	0	0.69
CG4674	FBgn0037856	Leash	CG3395	FBgn0010408	RpS9	11	9|1|8|9|8|7|8|2|4|0|6	0	0.6
CG4674	FBgn0037856	Leash	CG5502	FBgn0003279	RpL4	35.5	8|0|10|24|26|3|34|0|0|0|16	0	0.68
CG4674	FBgn0037856	Leash	CG17870	FBgn0004907	14-3-3zeta	18	5|0|5|20|20|0|27|2|3|0|22	0	0.68
CG4674	FBgn0037856	Leash	CG15693	FBgn0019936	RpS20	2	10|1|7|10|9|6|8|2|4|2|3	0	0.7
CG4674	FBgn0037856	Leash	CG7939	FBgn0002626	RpL32	7	2|0|2|2|1|0|2|0|0|0|3	0.59	0.05
CG4674	FBgn0037856	Leash	CG15697	FBgn0038834	RpS30	6	4|0|3|3|3|2|4|1|1|1|2	0.01	0.43
CG4674	FBgn0037856	Leash	CG10811	FBgn0023213	eIF4G1	45	14|5|19|70|75|11|36|7|14|20|30	0	0.69
CG4674	FBgn0037856	Leash	CG3949	FBgn0015393	hoip	5.5	3|0|2|4|3|2|50|2|2|1|3	0	0.7
CG4674	FBgn0037856	Leash	CG10944	FBgn0261592	RpS6	7	3|0|5|8|7|4|7|5|2|1|5	0	0.61
CG4674	FBgn0037856	Leash	CG6846	FBgn0036825	RpL26	5	2|0|3|1|3|2|6|0|0|0|5	0	0.54
CG4674	FBgn0037856	Leash	CG8715	FBgn0020279	lig	9.5	2|0|11|11|13|1|13|1|0|0|6	0	0.66
CG4674	FBgn0037856	Leash	CG9946	FBgn0261609	eIF2alpha	6.5	6|0|9|8|8|6|12|2|0|0|8	0	0.65
CG4674	FBgn0037856	Leash	CG9412	FBgn0015778	rin	7	0|0|5|9|11|0|11|0|2|2|12	0	0.66
CG4674	FBgn0037856	Leash	CG6995	FBgn0039229	Saf-B	23	0|0|0|5|6|0|9|0|0|0|2	1	0
CG4674	FBgn0037856	Leash	CG16901	FBgn0263396	sqd	8.5	2|0|7|7|4|0|8|0|2|2|5	0	0.59
CG4674	FBgn0037856	Leash	CG3401	FBgn0003888	betaTub60D	28.5	64|0|87|80|55|74|52|34|20|22|9	0	0.7
CG4674	FBgn0037856	Leash	CG1242	FBgn0001233	Hsp83	13.5	15|8|52|81|70|11|79|12|12|9|41	0	0.7
CG4674	FBgn0037856	Leash	CG10686	FBgn0041775	tral	9.5	0|0|0|12|13|0|19|0|0|0|5	0	0.67
CG4674	FBgn0037856	Leash	CG5119	FBgn0265297	pAbp	39.5	10|0|18|39|32|10|28|4|5|6|12	0	0.68
CG4674	FBgn0037856	Leash	CG1524	FBgn0004403	RpS14a	10.5	9|0|7|13|13|13|10|9|10|8|7	0	0.66
CG4674	FBgn0037856	Leash	CG1633	FBgn0040309	Jafrac1	1.5	6|2|8|15|11|2|23|2|2|0|15	0	0.7
CG4674	FBgn0037856	Leash	CG4046	FBgn0034743	RpS16	8	14|0|14|13|16|20|14|10|15|9|12	0	0.7
CG4674	FBgn0037856	Leash	CG11276	FBgn0011284	RpS4	26.5	11|1|3|29|25|10|22|6|9|5|7	0	0.68
CG4674	FBgn0037856	Leash	CG12775	FBgn0032987	RpL21	12.5	0|0|3|7|12|2|15|1|4|0|4	0	0.64
CG4674	FBgn0037856	Leash	CG3314	FBgn0014026	RpL7A	16	3|0|6|13|8|0|18|0|0|0|9	0	0.64
CG4674	FBgn0037856	Leash	CG10203	FBgn0028554	x16	1	0|0|0|4|4|0|2|0|0|0|2	0	0.7
CG4674	FBgn0037856	Leash	CG8415	FBgn0033912	RpS23	10.5	6|0|5|10|8|6|11|3|7|1|4	0	0.62
CG4674	FBgn0037856	Leash	CG7726	FBgn0013325	RpL11	3.5	2|1|1|3|2|3|4|1|0|0|4	0	0.53
CG4674	FBgn0037856	Leash	CG10777	FBgn0029979	mahe	5	0|0|0|9|9|0|7|0|0|0|3	0	0.64
CG4674	FBgn0037856	Leash	CG3922	FBgn0005533	RpS17	8	13|0|8|17|13|16|10|7|10|5|3	0	0.7
CG4674	FBgn0037856	Leash	CG5330	FBgn0015268	Nap1	5.5	7|0|7|15|7|4|10|2|0|0|4	0	0.66
CG4674	FBgn0037856	Leash	CG2033	FBgn0010198	RpS15Aa	17.5	5|1|5|11|9|7|6|2|6|3|8	0	0.51
CG4674	FBgn0037856	Leash	CG10377	FBgn0004838	Hrb27C	8.5	1|1|3|7|1|0|9|0|0|0|1	0	0.57
CG4674	FBgn0037856	Leash	CG6141	FBgn0015756	RpL9	13	2|1|3|5|6|0|5|3|3|0|4	0.25	0.31
CG4674	FBgn0037856	Leash	CG2746	FBgn0285950	RpL19	3.5	0|0|0|8|5|0|8|0|0|0|1	0	0.64
CG4674	FBgn0037856	Leash	CG13389	FBgn0010265	RpS13	10	12|0|7|17|16|13|17|8|6|2|8	0	0.68
CG4674	FBgn0037856	Leash	CG1821	FBgn0285949	RpL31	2.5	3|0|0|6|4|4|9|3|3|3|6	0	0.7
CG4674	FBgn0037856	Leash	CG10279	FBgn0003261	Rm62	65	5|2|11|40|40|12|33|7|14|7|18	0	0.67
CG4674	FBgn0037856	Leash	CG9277	FBgn0284243	betaTub56D	41.5	43|7|70|250|198|71|166|69|35|39|25	0	0.7
CG4674	FBgn0037856	Leash	CG12740	FBgn0035422	RpL28	11	4|0|4|7|6|0|15|0|0|0|6	0	0.61
CG4674	FBgn0037856	Leash	CG6253	FBgn0017579	RpL14	16	6|2|7|10|10|4|13|3|3|3|11	0	0.62
CG4674	FBgn0037856	Leash	CG11844	FBgn0046214	vig2	7.5	0|1|4|13|16|0|19|0|4|4|8	0	0.68
CG4674	FBgn0037856	Leash	CG8983	FBgn0033663	ERp60	3	4|5|16|45|36|0|36|3|4|2|24	0	0.7
CG4674	FBgn0037856	Leash	CG15792	FBgn0265434	zip	19	138|18|165|76|86|16|147|47|5|3|84	0	0.7
CG4674	FBgn0037856	Leash	CG4027	FBgn0000042	Act5C	30.5	0|22|0|93|85|0|0|60|36|22|78	0	0.7
CG4674	FBgn0037856	Leash	CG17420	FBgn0028697	RpL15	7	0|0|4|3|3|0|4|0|0|0|2	0.04	0.39
CG4674	FBgn0037856	Leash	CG3333	FBgn0259937	Nop60B	7.5	6|0|3|3|5|0|9|0|3|2|2	0	0.59
CG4674	FBgn0037856	Leash	CG5519	FBgn0261119	Prp19	122.5	7|0|2|11|11|2|13|0|0|0|3	1	0
CG4674	FBgn0037856	Leash	CG8280	FBgn0284245	eEF1alpha1	23.5	43|3|44|85|87|53|63|34|23|23|48	0	0.7
CG4674	FBgn0037856	Leash	CG11999	FBgn0037312	CG11999	3.5	7|1|5|49|55|8|23|6|4|7|17	0	0.7
CG4674	FBgn0037856	Leash	CG10305	FBgn0261597	RpS26	4.5	2|0|3|3|3|4|3|0|0|0|2	0	0.47
CG4674	FBgn0037856	Leash	CG6203	FBgn0028734	Fmr1	8	0|0|0|2|4|0|9|0|0|0|7	0	0.58
CG4674	FBgn0037856	Leash	CG9075	FBgn0001942	eIF4A	5.5	1|0|6|20|12|1|16|2|0|0|8	0	0.7
CG4674	FBgn0037856	Leash	CG9916	FBgn0004432	Cyp1	1.5	2|3|12|12|9|0|21|0|4|0|11	0	0.7
CG4674	FBgn0037856	Leash	CG2998	FBgn0030136	RpS28b	1.5	3|0|1|2|2|2|4|2|3|2|3	0	0.7
CG4674	FBgn0037856	Leash	CG9862	FBgn0034646	Rae1	4.5	0|0|0|5|2|0|9|0|0|0|1	0	0.59
CG4674	FBgn0037856	Leash	CG7977	FBgn0026372	RpL23A	15	10|1|13|8|8|3|36|1|2|0|8	0	0.68
CG4674	FBgn0037856	Leash	CG7622	FBgn0002579	RpL36	6.5	0|0|0|5|4|1|8|1|0|0|2	0	0.57
CG4674	FBgn0037856	Leash	CG10423	FBgn0039300	RpS27	5	11|0|10|9|9|13|7|8|5|8|4	0	0.7
CG4674	FBgn0037856	Leash	CG4035	FBgn0015218	eIF4E1	8.5	7|0|5|12|9|2|7|0|2|3|5	0	0.63
CG4674	FBgn0037856	Leash	CG5654	FBgn0022959	yps	14	2|0|7|18|22|0|34|0|3|2|7	0	0.69
CG4674	FBgn0037856	Leash	CG9983	FBgn0001215	Hrb98DE	5.5	0|0|0|4|5|0|8|0|0|0|2	0	0.59
CG4674	FBgn0037856	Leash	CG8615	FBgn0035753	RpL18	13.5	0|0|6|11|11|2|10|0|0|0|7	0	0.63
CG4674	FBgn0037856	Leash	CG8900	FBgn0010411	RpS18	9.5	28|2|17|15|11|36|13|8|14|11|11	0	0.7
CG4674	FBgn0037856	Leash	CG42648	FBgn0285951	mRpS34	1.5	0|0|0|1|3|0|4|0|0|0|0	0	0.52
CG4674	FBgn0037856	Leash	CG6684	FBgn0086472	RpS25	2.5	7|0|5|6|3|0|9|0|2|2|6	0	0.7
CG4674	FBgn0037856	Leash	CG4337	FBgn0010438	mtSSB	25	23|3|33|3|3|2|8|0|0|0|7	0	0.67
CG4674	FBgn0037856	Leash	CG10652	FBgn0086710	RpL30	4.5	2|0|3|2|7|1|10|1|1|1|2	0	0.62
CG4674	FBgn0037856	Leash	CG4147	FBgn0001218	Hsc70-3	57.5	28|8|40|84|92|42|76|19|25|26|44	0	0.69
CG4674	FBgn0037856	Leash	CG7439	FBgn0087035	AGO2	35	5|0|5|8|4|2|10|3|0|0|2	1	0
CG4674	FBgn0037856	Leash	CG3751	FBgn0261596	RpS24	5	0|0|0|4|4|5|3|2|2|1|0	0	0.53
CG4674	FBgn0037856	Leash	CG3056	FBgn0024987	ssx	8.5	0|0|0|9|9|0|4|0|0|0|3	0	0.6
CG4674	FBgn0037856	Leash	CG17489	FBgn0064225	RpL5	10	4|0|3|8|12|2|12|0|2|1|6	0	0.65
CG4674	FBgn0037856	Leash	CG8882	FBgn0015834	eIF3i	6.5	0|0|0|5|7|0|8|0|0|0|4	0	0.59
CG4674	FBgn0037856	Leash	CG17521	FBgn0024733	RpL10	6	1|0|2|6|4|0|3|0|0|0|4	0	0.53
CG4674	FBgn0037856	Leash	CG6143	FBgn0004401	Pep	31	9|1|8|21|21|0|72|2|2|0|14	0	0.69
CG4674	FBgn0037856	Leash	CG9748	FBgn0263231	bel	31	4|1|6|39|27|3|18|0|3|8|11	0	0.68
CG4674	FBgn0037856	Leash	CG6751	FBgn0263510	nclb	5.5	0|1|3|2|2|0|2|0|0|0|3	0.09	0.36
CG4674	FBgn0037856	Leash	CG4679	FBgn0033816	CG4679	5.5	0|0|0|4|2|0|2|0|0|0|1	0.09	0.36
CG4674	FBgn0037856	Leash	CG1883	FBgn0039757	RpS7	11	22|0|12|27|28|36|19|19|13|7|8	0	0.7
CG4674	FBgn0037856	Leash	CG5920	FBgn0004867	RpS2	11	9|1|8|15|9|6|10|3|5|6|8	0	0.65
CG4674	FBgn0037856	Leash	CG1404	FBgn0020255	Ran	5	2|3|2|16|15|3|32|2|0|0|5	0	0.7
CG4674	FBgn0037856	Leash	CG6341	FBgn0028737	eEF1beta	8.5	7|1|8|11|11|2|12|0|3|0|9	0	0.66
CG4674	FBgn0037856	Leash	CG4651	FBgn0011272	RpL13	13.5	5|5|6|9|7|2|13|4|3|0|5	0	0.61
CG4674	FBgn0037856	Leash	CG2168	FBgn0017545	RpS3A	18.5	22|2|17|32|35|31|30|26|15|5|23	0	0.7
CG4674	FBgn0037856	Leash	CG9282	FBgn0032518	RpL24	5	3|0|1|7|7|2|7|1|2|2|2	0	0.63
CG4674	FBgn0037856	Leash	CG8332	FBgn0034138	RpS15	5.5	5|1|2|16|12|16|13|3|9|4|5	0	0.7
CG4674	FBgn0037856	Leash	CG14648	FBgn0263594	lost	9	3|1|13|23|12|3|17|2|0|0|14	0	0.68
CG4674	FBgn0037856	Leash	CG1101	FBgn0010774	Ref1	7	1|0|2|4|4|0|20|0|0|0|8	0	0.65
CG4674	FBgn0037856	Leash	CG11522	FBgn0039857	RpL6	16	1|0|4|12|12|0|13|0|2|0|4	0	0.63
CG4674	FBgn0037856	Leash	CG10630	FBgn0035608	blanks	7	0|3|10|15|14|0|15|3|0|2|8	0	0.68
CG4674	FBgn0037856	Leash	CG4254	FBgn0011726	tsr	2	4|2|7|16|11|1|30|3|5|0|15	0	0.7
CG4674	FBgn0037856	Leash	CG7434	FBgn0015288	RpL22	7	6|0|7|7|8|3|13|1|2|0|8	0	0.65
CG4674	FBgn0037856	Leash	CG18811	FBgn0042134	Capr	4	0|0|0|5|7|0|5|0|0|0|6	0	0.61
CG4674	FBgn0037856	Leash	CG5787	FBgn0032454	CG5787	24	3|1|1|7|7|0|54|0|0|0|2	0	0.68
CG4674	FBgn0037856	Leash	CG4211	FBgn0004227	nonA	14.5	0|0|0|24|14|0|7|0|0|4|8	0	0.66
CG4674	FBgn0037856	Leash	CG3201	FBgn0004687	Mlc-c	3.5	10|0|7|1|3|2|8|2|2|1|6	0	0.65
CG4674	FBgn0037856	Leash	CG6946	FBgn0259139	glo	3.5	0|0|0|9|5|0|5|0|0|0|4	0	0.61
CG4674	FBgn0037856	Leash	CG1475	FBgn0037351	RpL13A	8	0|0|0|6|5|0|5|0|0|0|2	0	0.52
CG4674	FBgn0037856	Leash	CG15442	FBgn0285948	RpL27A	6.5	0|0|0|7|7|4|5|0|0|0|2	0	0.58
CG4674	FBgn0037856	Leash	CG4863	FBgn0020910	RpL3	8.5	2|0|3|14|10|0|10|0|0|0|5	0	0.66
CG4674	FBgn0037856	Leash	CG7808	FBgn0039713	RpS8	10.5	6|1|10|13|12|7|10|5|5|6|8	0	0.65
CG4674	FBgn0037856	Leash	CG4869	FBgn0003890	betaTub97EF	16	13|3|27|45|37|0|35|0|0|0|1	0	0.69
CG4674	FBgn0037856	Leash	CG1691	FBgn0285926	Imp	14	0|0|0|9|8|0|6|0|0|0|3	0	0.47
CG4674	FBgn0037856	Leash	CG4264	FBgn0266599	Hsc70-4	134	71|17|85|147|159|75|141|61|47|44|93	0	0.69
CG4674	FBgn0037856	Leash	CG3203	FBgn0029897	RpL17	4	0|0|0|6|5|2|4|0|0|0|1	0	0.59
CG4674	FBgn0037856	Leash	CG16944	FBgn0003360	sesB	31	24|4|25|33|34|26|19|28|33|25|19	0	0.69
CG4674	FBgn0037856	Leash	CG3379	FBgn0013981	His4r	1	2|0|1|0|0|0|3|0|0|0|1	0	0.7
CG4674	FBgn0037856	Leash	CG6779	FBgn0002622	RpS3	12	40|2|33|36|37|36|30|15|31|25|17	0	0.7
CG4674	FBgn0037856	Leash	CG5827	FBgn0261608	RpL37A	2	1|0|2|2|3|2|3|3|0|0|2	0	0.53
CG4674	FBgn0037856	Leash	CG1263	FBgn0261602	RpL8	7	3|0|8|6|7|0|16|0|0|0|5	0	0.65
CG4674	FBgn0037856	Leash	CG4759	FBgn0039359	RpL27	7	0|0|3|5|3|0|12|0|0|0|3	0	0.6
CG4674	FBgn0037856	Leash	CG4897	FBgn0005593	RpL7	19	3|1|4|13|10|2|12|0|0|0|8	0	0.6
CG4674	FBgn0037856	Leash	CG1913	FBgn0003884	alphaTub84B	10.5	8|4|13|23|18|14|18|11|12|11|10	0	0.7
CG4674	FBgn0037856	Leash	CG7283	FBgn0036213	RpL10Ab	22	6|1|7|8|9|4|16|3|4|3|8	0	0.51
CG4674	FBgn0037856	Leash	CG3661	FBgn0010078	RpL23	32	38|4|28|52|56|53|46|34|17|9|32	0	0.69
CG4674	FBgn0037856	Leash	CG3849	FBgn0063485	Lasp	7	0|1|11|8|3|0|14|0|0|0|8	0	0.65
CG18748	FBgn0042105	CG18748	CG3395	FBgn0010408	RpS9	1.5	9|1|8|9|8|7|8|2|4|0|6	0	0.7
CG18748	FBgn0042105	CG18748	CG5502	FBgn0003279	RpL4	13	8|0|10|24|26|3|34|0|0|0|16	0	0.69
CG18748	FBgn0042105	CG18748	CG7380	FBgn0031977	baf	4	62|3|27|1|1|1|5|4|1|1|3	0	0.7
CG18748	FBgn0042105	CG18748	CG17870	FBgn0004907	14-3-3zeta	6	5|0|5|20|20|0|27|2|3|0|22	0	0.7
CG18748	FBgn0042105	CG18748	CG15693	FBgn0019936	RpS20	2.5	10|1|7|10|9|6|8|2|4|2|3	0	0.7
CG18748	FBgn0042105	CG18748	CG7939	FBgn0002626	RpL32	2	2|0|2|2|1|0|2|0|0|0|3	0	0.46
CG18748	FBgn0042105	CG18748	CG15697	FBgn0038834	RpS30	1	4|0|3|3|3|2|4|1|1|1|2	0	0.7
CG18748	FBgn0042105	CG18748	CG10811	FBgn0023213	eIF4G1	29	14|5|19|70|75|11|36|7|14|20|30	0	0.69
CG18748	FBgn0042105	CG18748	CG3949	FBgn0015393	hoip	1	3|0|2|4|3|2|50|2|2|1|3	0	0.7
CG18748	FBgn0042105	CG18748	CG10944	FBgn0261592	RpS6	1	3|0|5|8|7|4|7|5|2|1|5	0	0.7
CG18748	FBgn0042105	CG18748	CG6846	FBgn0036825	RpL26	1	2|0|3|1|3|2|6|0|0|0|5	0	0.7
CG18748	FBgn0042105	CG18748	CG8715	FBgn0020279	lig	11	2|0|11|11|13|1|13|1|0|0|6	0	0.65
CG18748	FBgn0042105	CG18748	CG9946	FBgn0261609	eIF2alpha	27	6|0|9|8|8|6|12|2|0|0|8	0.53	0.07
CG18748	FBgn0042105	CG18748	CG9412	FBgn0015778	rin	4.5	0|0|5|9|11|0|11|0|2|2|12	0	0.67
CG18748	FBgn0042105	CG18748	CG16901	FBgn0263396	sqd	6.5	2|0|7|7|4|0|8|0|2|2|5	0	0.62
CG18748	FBgn0042105	CG18748	CG3401	FBgn0003888	betaTub60D	45.5	64|0|87|80|55|74|52|34|20|22|9	0	0.69
CG18748	FBgn0042105	CG18748	CG9916	FBgn0004432	Cyp1	2.5	2|3|12|12|9|0|21|0|4|0|11	0	0.7
CG18748	FBgn0042105	CG18748	CG10686	FBgn0041775	tral	1.5	0|0|0|12|13|0|19|0|0|0|5	0	0.7
CG18748	FBgn0042105	CG18748	CG5119	FBgn0265297	pAbp	25	10|0|18|39|32|10|28|4|5|6|12	0	0.69
CG18748	FBgn0042105	CG18748	CG1524	FBgn0004403	RpS14a	9	9|0|7|13|13|13|10|9|10|8|7	0	0.66
CG18748	FBgn0042105	CG18748	CG4046	FBgn0034743	RpS16	7	14|0|14|13|16|20|14|10|15|9|12	0	0.7
CG18748	FBgn0042105	CG18748	CG11276	FBgn0011284	RpS4	6	11|1|3|29|25|10|22|6|9|5|7	0	0.7
CG18748	FBgn0042105	CG18748	CG12775	FBgn0032987	RpL21	4	0|0|3|7|12|2|15|1|4|0|4	0	0.67
CG18748	FBgn0042105	CG18748	CG3314	FBgn0014026	RpL7A	1	3|0|6|13|8|0|18|0|0|0|9	0	0.7
CG18748	FBgn0042105	CG18748	CG8415	FBgn0033912	RpS23	3.5	6|0|5|10|8|6|11|3|7|1|4	0	0.7
CG18748	FBgn0042105	CG18748	CG7726	FBgn0013325	RpL11	1	2|1|1|3|2|3|4|1|0|0|4	0	0.58
CG18748	FBgn0042105	CG18748	CG3922	FBgn0005533	RpS17	10	13|0|8|17|13|16|10|7|10|5|3	0	0.67
CG18748	FBgn0042105	CG18748	CG5330	FBgn0015268	Nap1	36.5	7|0|7|15|7|4|10|2|0|0|4	0.97	0.01
CG18748	FBgn0042105	CG18748	CG2033	FBgn0010198	RpS15Aa	2	5|1|5|11|9|7|6|2|6|3|8	0	0.7
CG18748	FBgn0042105	CG18748	CG10377	FBgn0004838	Hrb27C	4.5	1|1|3|7|1|0|9|0|0|0|1	0	0.61
CG18748	FBgn0042105	CG18748	CG6141	FBgn0015756	RpL9	2.5	2|1|3|5|6|0|5|3|3|0|4	0	0.61
CG18748	FBgn0042105	CG18748	CG13389	FBgn0010265	RpS13	3	12|0|7|17|16|13|17|8|6|2|8	0	0.7
CG18748	FBgn0042105	CG18748	CG1821	FBgn0285949	RpL31	1	3|0|0|6|4|4|9|3|3|3|6	0	0.7
CG18748	FBgn0042105	CG18748	CG10279	FBgn0003261	Rm62	9	5|2|11|40|40|12|33|7|14|7|18	0	0.7
CG18748	FBgn0042105	CG18748	CG9277	FBgn0284243	betaTub56D	85	43|7|70|250|198|71|166|69|35|39|25	0	0.7
CG18748	FBgn0042105	CG18748	CG12740	FBgn0035422	RpL28	2.5	4|0|4|7|6|0|15|0|0|0|6	0	0.7
CG18748	FBgn0042105	CG18748	CG6253	FBgn0017579	RpL14	3.5	6|2|7|10|10|4|13|3|3|3|11	0	0.7
CG18748	FBgn0042105	CG18748	CG11844	FBgn0046214	vig2	3	0|1|4|13|16|0|19|0|4|4|8	0	0.7
CG18748	FBgn0042105	CG18748	CG12055	FBgn0001091	Gapdh1	1.5	1|0|9|11|8|1|10|1|0|0|5	0	0.7
CG18748	FBgn0042105	CG18748	CG8983	FBgn0033663	ERp60	14.5	4|5|16|45|36|0|36|3|4|2|24	0	0.7
CG18748	FBgn0042105	CG18748	CG15792	FBgn0265434	zip	1855	138|18|165|76|86|16|147|47|5|3|84	1	0
CG18748	FBgn0042105	CG18748	CG3333	FBgn0259937	Nop60B	1	6|0|3|3|5|0|9|0|3|2|2	0	0.7
CG18748	FBgn0042105	CG18748	CG8280	FBgn0284245	eEF1alpha1	39	43|3|44|85|87|53|63|34|23|23|48	0	0.7
CG18748	FBgn0042105	CG18748	CG10305	FBgn0261597	RpS26	2	2|0|3|3|3|4|3|0|0|0|2	0	0.55
CG18748	FBgn0042105	CG18748	CG6203	FBgn0028734	Fmr1	2	0|0|0|2|4|0|9|0|0|0|7	0	0.63
CG18748	FBgn0042105	CG18748	CG9075	FBgn0001942	eIF4A	2	1|0|6|20|12|1|16|2|0|0|8	0	0.7
CG18748	FBgn0042105	CG18748	CG2998	FBgn0030136	RpS28b	1	3|0|1|2|2|2|4|2|3|2|3	0	0.7
CG18748	FBgn0042105	CG18748	CG2746	FBgn0285950	RpL19	2	0|0|0|8|5|0|8|0|0|0|1	0	0.64
CG18748	FBgn0042105	CG18748	CG7977	FBgn0026372	RpL23A	1.5	10|1|13|8|8|3|36|1|2|0|8	0	0.7
CG18748	FBgn0042105	CG18748	CG7622	FBgn0002579	RpL36	2	0|0|0|5|4|1|8|1|0|0|2	0	0.63
CG18748	FBgn0042105	CG18748	CG10423	FBgn0039300	RpS27	4.5	11|0|10|9|9|13|7|8|5|8|4	0	0.7
CG18748	FBgn0042105	CG18748	CG4035	FBgn0015218	eIF4E1	2	7|0|5|12|9|2|7|0|2|3|5	0	0.7
CG18748	FBgn0042105	CG18748	CG5654	FBgn0022959	yps	3.5	2|0|7|18|22|0|34|0|3|2|7	0	0.7
CG18748	FBgn0042105	CG18748	CG9983	FBgn0001215	Hrb98DE	1.5	0|0|0|4|5|0|8|0|0|0|2	0	0.63
CG18748	FBgn0042105	CG18748	CG8615	FBgn0035753	RpL18	2.5	0|0|6|11|11|2|10|0|0|0|7	0	0.7
CG18748	FBgn0042105	CG18748	CG8900	FBgn0010411	RpS18	5	28|2|17|15|11|36|13|8|14|11|11	0	0.7
CG18748	FBgn0042105	CG18748	CG11999	FBgn0037312	CG11999	9	7|1|5|49|55|8|23|6|4|7|17	0	0.7
CG18748	FBgn0042105	CG18748	CG4337	FBgn0010438	mtSSB	10.5	23|3|33|3|3|2|8|0|0|0|7	0	0.68
CG18748	FBgn0042105	CG18748	CG10652	FBgn0086710	RpL30	2	2|0|3|2|7|1|10|1|1|1|2	0	0.7
CG18748	FBgn0042105	CG18748	CG4147	FBgn0001218	Hsc70-3	111	28|8|40|84|92|42|76|19|25|26|44	0	0.69
CG18748	FBgn0042105	CG18748	CG7439	FBgn0087035	AGO2	22	5|0|5|8|4|2|10|3|0|0|2	0.6	0.05
CG18748	FBgn0042105	CG18748	CG3751	FBgn0261596	RpS24	4	0|0|0|4|4|5|3|2|2|1|0	0	0.56
CG18748	FBgn0042105	CG18748	CG1883	FBgn0039757	RpS7	10	22|0|12|27|28|36|19|19|13|7|8	0	0.7
CG18748	FBgn0042105	CG18748	CG17489	FBgn0064225	RpL5	2	4|0|3|8|12|2|12|0|2|1|6	0	0.7
CG18748	FBgn0042105	CG18748	CG8882	FBgn0015834	eIF3i	2	0|0|0|5|7|0|8|0|0|0|4	0	0.63
CG18748	FBgn0042105	CG18748	CG16944	FBgn0003360	sesB	28.5	24|4|25|33|34|26|19|28|33|25|19	0	0.69
CG18748	FBgn0042105	CG18748	CG9748	FBgn0263231	bel	34	4|1|6|39|27|3|18|0|3|8|11	0	0.67
CG18748	FBgn0042105	CG18748	CG1242	FBgn0001233	Hsp83	55.5	15|8|52|81|70|11|79|12|12|9|41	0	0.69
CG18748	FBgn0042105	CG18748	CG7434	FBgn0015288	RpL22	3	6|0|7|7|8|3|13|1|2|0|8	0	0.7
CG18748	FBgn0042105	CG18748	CG5920	FBgn0004867	RpS2	4.5	9|1|8|15|9|6|10|3|5|6|8	0	0.7
CG18748	FBgn0042105	CG18748	CG1404	FBgn0020255	Ran	6	2|3|2|16|15|3|32|2|0|0|5	0	0.7
CG18748	FBgn0042105	CG18748	CG6341	FBgn0028737	eEF1beta	4.5	7|1|8|11|11|2|12|0|3|0|9	0	0.7
CG18748	FBgn0042105	CG18748	CG4651	FBgn0011272	RpL13	3.5	5|5|6|9|7|2|13|4|3|0|5	0	0.7
CG18748	FBgn0042105	CG18748	CG2168	FBgn0017545	RpS3A	12	22|2|17|32|35|31|30|26|15|5|23	0	0.7
CG18748	FBgn0042105	CG18748	CG9282	FBgn0032518	RpL24	4	3|0|1|7|7|2|7|1|2|2|2	0	0.63
CG18748	FBgn0042105	CG18748	CG8332	FBgn0034138	RpS15	9.5	5|1|2|16|12|16|13|3|9|4|5	0	0.67
CG18748	FBgn0042105	CG18748	CG14648	FBgn0263594	lost	14.5	3|1|13|23|12|3|17|2|0|0|14	0	0.67
CG18748	FBgn0042105	CG18748	CG11522	FBgn0039857	RpL6	3.5	1|0|4|12|12|0|13|0|2|0|4	0	0.7
CG18748	FBgn0042105	CG18748	CG10630	FBgn0035608	blanks	5.5	0|3|10|15|14|0|15|3|0|2|8	0	0.7
CG18748	FBgn0042105	CG18748	CG4254	FBgn0011726	tsr	6	4|2|7|16|11|1|30|3|5|0|15	0	0.7
CG18748	FBgn0042105	CG18748	CG18811	FBgn0042134	Capr	2	0|0|0|5|7|0|5|0|0|0|6	0	0.63
CG18748	FBgn0042105	CG18748	CG6143	FBgn0004401	Pep	7.5	9|1|8|21|21|0|72|2|2|0|14	0	0.7
CG18748	FBgn0042105	CG18748	CG4211	FBgn0004227	nonA	2.5	0|0|0|24|14|0|7|0|0|4|8	0	0.7
CG18748	FBgn0042105	CG18748	CG3201	FBgn0004687	Mlc-c	44	10|0|7|1|3|2|8|2|2|1|6	1	0
CG18748	FBgn0042105	CG18748	CG15442	FBgn0285948	RpL27A	2.5	0|0|0|7|7|4|5|0|0|0|2	0	0.63
CG18748	FBgn0042105	CG18748	CG4863	FBgn0020910	RpL3	1.5	2|0|3|14|10|0|10|0|0|0|5	0	0.7
CG18748	FBgn0042105	CG18748	CG7808	FBgn0039713	RpS8	4.5	6|1|10|13|12|7|10|5|5|6|8	0	0.7
CG18748	FBgn0042105	CG18748	CG4869	FBgn0003890	betaTub97EF	27	13|3|27|45|37|0|35|0|0|0|1	0	0.69
CG18748	FBgn0042105	CG18748	CG4264	FBgn0266599	Hsc70-4	326	71|17|85|147|159|75|141|61|47|44|93	0	0.67
CG18748	FBgn0042105	CG18748	CG3203	FBgn0029897	RpL17	4	0|0|0|6|5|2|4|0|0|0|1	0	0.59
CG18748	FBgn0042105	CG18748	CG4898	FBgn0003721	Tm1	48	15|0|5|4|0|0|17|0|0|0|19	0.99	0
CG18748	FBgn0042105	CG18748	CG6779	FBgn0002622	RpS3	15.5	40|2|33|36|37|36|30|15|31|25|17	0	0.7
CG18748	FBgn0042105	CG18748	CG1263	FBgn0261602	RpL8	3.5	3|0|8|6|7|0|16|0|0|0|5	0	0.7
CG18748	FBgn0042105	CG18748	CG4759	FBgn0039359	RpL27	2.5	0|0|3|5|3|0|12|0|0|0|3	0	0.64
CG18748	FBgn0042105	CG18748	CG4897	FBgn0005593	RpL7	4	3|1|4|13|10|2|12|0|0|0|8	0	0.7
CG18748	FBgn0042105	CG18748	CG1913	FBgn0003884	alphaTub84B	19	8|4|13|23|18|14|18|11|12|11|10	0	0.67
CG18748	FBgn0042105	CG18748	CG7283	FBgn0036213	RpL10Ab	4.5	6|1|7|8|9|4|16|3|4|3|8	0	0.7
CG18748	FBgn0042105	CG18748	CG3661	FBgn0010078	RpL23	13	38|4|28|52|56|53|46|34|17|9|32	0	0.7
CG18748	FBgn0042105	CG18748	CG3849	FBgn0063485	Lasp	1.5	0|1|11|8|3|0|14|0|0|0|8	0	0.7
CG7047	FBgn0035103	Vdup1	CG3395	FBgn0010408	RpS9	23	9|1|8|9|8|7|8|2|4|0|6	0.57	0.06
CG7047	FBgn0035103	Vdup1	CG5502	FBgn0003279	RpL4	53.5	8|0|10|24|26|3|34|0|0|0|16	0	0.63
CG7047	FBgn0035103	Vdup1	CG7380	FBgn0031977	baf	1	62|3|27|1|1|1|5|4|1|1|3	0	0.7
CG7047	FBgn0035103	Vdup1	CG17870	FBgn0004907	14-3-3zeta	15	5|0|5|20|20|0|27|2|3|0|22	0	0.68
CG7047	FBgn0035103	Vdup1	CG15693	FBgn0019936	RpS20	6	10|1|7|10|9|6|8|2|4|2|3	0	0.66
CG7047	FBgn0035103	Vdup1	CG7939	FBgn0002626	RpL32	15.5	2|0|2|2|1|0|2|0|0|0|3	1	0
CG7047	FBgn0035103	Vdup1	CG15697	FBgn0038834	RpS30	6	4|0|3|3|3|2|4|1|1|1|2	0.01	0.45
CG7047	FBgn0035103	Vdup1	CG10811	FBgn0023213	eIF4G1	43.5	14|5|19|70|75|11|36|7|14|20|30	0	0.69
CG7047	FBgn0035103	Vdup1	CG3949	FBgn0015393	hoip	8	3|0|2|4|3|2|50|2|2|1|3	0	0.68
CG7047	FBgn0035103	Vdup1	CG10944	FBgn0261592	RpS6	16.5	3|0|5|8|7|4|7|5|2|1|5	0.09	0.37
CG7047	FBgn0035103	Vdup1	CG6846	FBgn0036825	RpL26	10	2|0|3|1|3|2|6|0|0|0|5	0.18	0.34
CG7047	FBgn0035103	Vdup1	CG8715	FBgn0020279	lig	21.5	2|0|11|11|13|1|13|1|0|0|6	0.04	0.39
CG7047	FBgn0035103	Vdup1	CG9946	FBgn0261609	eIF2alpha	11	6|0|9|8|8|6|12|2|0|0|8	0	0.62
CG7047	FBgn0035103	Vdup1	CG9412	FBgn0015778	rin	13	0|0|5|9|11|0|11|0|2|2|12	0	0.63
CG7047	FBgn0035103	Vdup1	CG6995	FBgn0039229	Saf-B	7.5	0|0|0|5|6|0|9|0|0|0|2	0	0.59
CG7047	FBgn0035103	Vdup1	CG16901	FBgn0263396	sqd	11	2|0|7|7|4|0|8|0|2|2|5	0	0.53
CG7047	FBgn0035103	Vdup1	CG3401	FBgn0003888	betaTub60D	50	64|0|87|80|55|74|52|34|20|22|9	0	0.69
CG7047	FBgn0035103	Vdup1	CG1242	FBgn0001233	Hsp83	17	15|8|52|81|70|11|79|12|12|9|41	0	0.7
CG7047	FBgn0035103	Vdup1	CG10686	FBgn0041775	tral	45.5	0|0|0|12|13|0|19|0|0|0|5	0.96	0.01
CG7047	FBgn0035103	Vdup1	CG5119	FBgn0265297	pAbp	52.5	10|0|18|39|32|10|28|4|5|6|12	0	0.67
CG7047	FBgn0035103	Vdup1	CG1524	FBgn0004403	RpS14a	15.5	9|0|7|13|13|13|10|9|10|8|7	0	0.65
CG7047	FBgn0035103	Vdup1	CG1633	FBgn0040309	Jafrac1	1.5	6|2|8|15|11|2|23|2|2|0|15	0	0.7
CG7047	FBgn0035103	Vdup1	CG4046	FBgn0034743	RpS16	18	14|0|14|13|16|20|14|10|15|9|12	0	0.67
CG7047	FBgn0035103	Vdup1	CG11276	FBgn0011284	RpS4	46.5	11|1|3|29|25|10|22|6|9|5|7	0	0.64
CG7047	FBgn0035103	Vdup1	CG12775	FBgn0032987	RpL21	15	0|0|3|7|12|2|15|1|4|0|4	0	0.61
CG7047	FBgn0035103	Vdup1	CG3314	FBgn0014026	RpL7A	21	3|0|6|13|8|0|18|0|0|0|9	0	0.6
CG7047	FBgn0035103	Vdup1	CG9641	FBgn0031483	CG9641	4.5	0|0|0|9|5|0|1|0|0|0|4	0	0.61
CG7047	FBgn0035103	Vdup1	CG8415	FBgn0033912	RpS23	20	6|0|5|10|8|6|11|3|7|1|4	0.09	0.37
CG7047	FBgn0035103	Vdup1	CG7726	FBgn0013325	RpL11	7.5	2|1|1|3|2|3|4|1|0|0|4	0.05	0.39
CG7047	FBgn0035103	Vdup1	CG10777	FBgn0029979	mahe	12.5	0|0|0|9|9|0|7|0|0|0|3	0	0.57
CG7047	FBgn0035103	Vdup1	CG3922	FBgn0005533	RpS17	16	13|0|8|17|13|16|10|7|10|5|3	0	0.66
CG7047	FBgn0035103	Vdup1	CG5330	FBgn0015268	Nap1	7.5	7|0|7|15|7|4|10|2|0|0|4	0	0.66
CG7047	FBgn0035103	Vdup1	CG2033	FBgn0010198	RpS15Aa	21	5|1|5|11|9|7|6|2|6|3|8	0.03	0.41
CG7047	FBgn0035103	Vdup1	CG10377	FBgn0004838	Hrb27C	12	1|1|3|7|1|0|9|0|0|0|1	0.01	0.43
CG7047	FBgn0035103	Vdup1	CG6141	FBgn0015756	RpL9	31	2|1|3|5|6|0|5|3|3|0|4	1	0
CG7047	FBgn0035103	Vdup1	CG2746	FBgn0285950	RpL19	7	0|0|0|8|5|0|8|0|0|0|1	0	0.61
CG7047	FBgn0035103	Vdup1	CG13389	FBgn0010265	RpS13	17.5	12|0|7|17|16|13|17|8|6|2|8	0	0.67
CG7047	FBgn0035103	Vdup1	CG1821	FBgn0285949	RpL31	9	3|0|0|6|4|4|9|3|3|3|6	0	0.58
CG7047	FBgn0035103	Vdup1	CG10279	FBgn0003261	Rm62	58.5	5|2|11|40|40|12|33|7|14|7|18	0	0.68
CG7047	FBgn0035103	Vdup1	CG9277	FBgn0284243	betaTub56D	51	43|7|70|250|198|71|166|69|35|39|25	0	0.7
CG7047	FBgn0035103	Vdup1	CG12740	FBgn0035422	RpL28	13	4|0|4|7|6|0|15|0|0|0|6	0	0.6
CG7047	FBgn0035103	Vdup1	CG6253	FBgn0017579	RpL14	34	6|2|7|10|10|4|13|3|3|3|11	0.98	0
CG7047	FBgn0035103	Vdup1	CG11844	FBgn0046214	vig2	8	0|1|4|13|16|0|19|0|4|4|8	0	0.68
CG7047	FBgn0035103	Vdup1	CG8983	FBgn0033663	ERp60	7	4|5|16|45|36|0|36|3|4|2|24	0	0.7
CG7047	FBgn0035103	Vdup1	CG15792	FBgn0265434	zip	89.5	138|18|165|76|86|16|147|47|5|3|84	0	0.69
CG7047	FBgn0035103	Vdup1	CG4027	FBgn0000042	Act5C	14	0|22|0|93|85|0|0|60|36|22|78	0	0.7
CG7047	FBgn0035103	Vdup1	CG17420	FBgn0028697	RpL15	6	0|0|4|3|3|0|4|0|0|0|2	0.12	0.36
CG7047	FBgn0035103	Vdup1	CG3333	FBgn0259937	Nop60B	27	6|0|3|3|5|0|9|0|3|2|2	1	0
CG7047	FBgn0035103	Vdup1	CG5519	FBgn0261119	Prp19	18	7|0|2|11|11|2|13|0|0|0|3	0	0.57
CG7047	FBgn0035103	Vdup1	CG8280	FBgn0284245	eEF1alpha1	32.5	43|3|44|85|87|53|63|34|23|23|48	0	0.7
CG7047	FBgn0035103	Vdup1	CG11999	FBgn0037312	CG11999	13	7|1|5|49|55|8|23|6|4|7|17	0	0.7
CG7047	FBgn0035103	Vdup1	CG10305	FBgn0261597	RpS26	4.5	2|0|3|3|3|4|3|0|0|0|2	0	0.47
CG7047	FBgn0035103	Vdup1	CG6203	FBgn0028734	Fmr1	36	0|0|0|2|4|0|9|0|0|0|7	0.93	0.01
CG7047	FBgn0035103	Vdup1	CG9075	FBgn0001942	eIF4A	6	1|0|6|20|12|1|16|2|0|0|8	0	0.7
CG7047	FBgn0035103	Vdup1	CG9916	FBgn0004432	Cyp1	5.5	2|3|12|12|9|0|21|0|4|0|11	0	0.7
CG7047	FBgn0035103	Vdup1	CG2998	FBgn0030136	RpS28b	4	3|0|1|2|2|2|4|2|3|2|3	0	0.49
CG7047	FBgn0035103	Vdup1	CG9862	FBgn0034646	Rae1	1	0|0|0|5|2|0|9|0|0|0|1	0	0.7
CG7047	FBgn0035103	Vdup1	CG7977	FBgn0026372	RpL23A	19	10|1|13|8|8|3|36|1|2|0|8	0	0.67
CG7047	FBgn0035103	Vdup1	CG7622	FBgn0002579	RpL36	9.5	0|0|0|5|4|1|8|1|0|0|2	0	0.5
CG7047	FBgn0035103	Vdup1	CG10423	FBgn0039300	RpS27	7.5	11|0|10|9|9|13|7|8|5|8|4	0	0.66
CG7047	FBgn0035103	Vdup1	CG4035	FBgn0015218	eIF4E1	7.5	7|0|5|12|9|2|7|0|2|3|5	0	0.64
CG7047	FBgn0035103	Vdup1	CG5654	FBgn0022959	yps	24	2|0|7|18|22|0|34|0|3|2|7	0	0.68
CG7047	FBgn0035103	Vdup1	CG9983	FBgn0001215	Hrb98DE	9.5	0|0|0|4|5|0|8|0|0|0|2	0.01	0.44
CG7047	FBgn0035103	Vdup1	CG8615	FBgn0035753	RpL18	25.5	0|0|6|11|11|2|10|0|0|0|7	0.47	0.27
CG7047	FBgn0035103	Vdup1	CG8900	FBgn0010411	RpS18	14.5	28|2|17|15|11|36|13|8|14|11|11	0	0.69
CG7047	FBgn0035103	Vdup1	CG42648	FBgn0285951	mRpS34	1	0|0|0|1|3|0|4|0|0|0|0	0	0.52
CG7047	FBgn0035103	Vdup1	CG6684	FBgn0086472	RpS25	4.5	7|0|5|6|3|0|9|0|2|2|6	0	0.63
CG7047	FBgn0035103	Vdup1	CG4337	FBgn0010438	mtSSB	3	23|3|33|3|3|2|8|0|0|0|7	0	0.7
CG7047	FBgn0035103	Vdup1	CG10652	FBgn0086710	RpL30	11.5	2|0|3|2|7|1|10|1|1|1|2	0	0.51
CG7047	FBgn0035103	Vdup1	CG4147	FBgn0001218	Hsc70-3	42.5	28|8|40|84|92|42|76|19|25|26|44	0	0.69
CG7047	FBgn0035103	Vdup1	CG7439	FBgn0087035	AGO2	29	5|0|5|8|4|2|10|3|0|0|2	1	0
CG7047	FBgn0035103	Vdup1	CG3751	FBgn0261596	RpS24	6.5	0|0|0|4|4|5|3|2|2|1|0	0	0.48
CG7047	FBgn0035103	Vdup1	CG3056	FBgn0024987	ssx	10	0|0|0|9|9|0|4|0|0|0|3	0	0.57
CG7047	FBgn0035103	Vdup1	CG17489	FBgn0064225	RpL5	21	4|0|3|8|12|2|12|0|2|1|6	0	0.46
CG7047	FBgn0035103	Vdup1	CG8882	FBgn0015834	eIF3i	6.5	0|0|0|5|7|0|8|0|0|0|4	0	0.6
CG7047	FBgn0035103	Vdup1	CG17521	FBgn0024733	RpL10	5	1|0|2|6|4|0|3|0|0|0|4	0	0.55
CG7047	FBgn0035103	Vdup1	CG6143	FBgn0004401	Pep	40.5	9|1|8|21|21|0|72|2|2|0|14	0	0.69
CG7047	FBgn0035103	Vdup1	CG9748	FBgn0263231	bel	29	4|1|6|39|27|3|18|0|3|8|11	0	0.68
CG7047	FBgn0035103	Vdup1	CG6751	FBgn0263510	nclb	4.5	0|1|3|2|2|0|2|0|0|0|3	0.07	0.37
CG7047	FBgn0035103	Vdup1	CG4679	FBgn0033816	CG4679	5	0|0|0|4|2|0|2|0|0|0|1	0.04	0.39
CG7047	FBgn0035103	Vdup1	CG1883	FBgn0039757	RpS7	11.5	22|0|12|27|28|36|19|19|13|7|8	0	0.7
CG7047	FBgn0035103	Vdup1	CG5920	FBgn0004867	RpS2	29.5	9|1|8|15|9|6|10|3|5|6|8	0.5	0.08
CG7047	FBgn0035103	Vdup1	CG1404	FBgn0020255	Ran	1.5	2|3|2|16|15|3|32|2|0|0|5	0	0.7
CG7047	FBgn0035103	Vdup1	CG6341	FBgn0028737	eEF1beta	2.5	7|1|8|11|11|2|12|0|3|0|9	0	0.7
CG7047	FBgn0035103	Vdup1	CG4651	FBgn0011272	RpL13	20.5	5|5|6|9|7|2|13|4|3|0|5	0	0.47
CG7047	FBgn0035103	Vdup1	CG2168	FBgn0017545	RpS3A	40	22|2|17|32|35|31|30|26|15|5|23	0	0.68
CG7047	FBgn0035103	Vdup1	CG7111	FBgn0020618	Rack1	2	0|0|9|7|6|4|7|2|1|4|8	0	0.7
CG7047	FBgn0035103	Vdup1	CG9282	FBgn0032518	RpL24	11	3|0|1|7|7|2|7|1|2|2|2	0	0.55
CG7047	FBgn0035103	Vdup1	CG8332	FBgn0034138	RpS15	25	5|1|2|16|12|16|13|3|9|4|5	0	0.58
CG7047	FBgn0035103	Vdup1	CG14648	FBgn0263594	lost	13	3|1|13|23|12|3|17|2|0|0|14	0	0.68
CG7047	FBgn0035103	Vdup1	CG1101	FBgn0010774	Ref1	4	1|0|2|4|4|0|20|0|0|0|8	0	0.67
CG7047	FBgn0035103	Vdup1	CG11522	FBgn0039857	RpL6	18	1|0|4|12|12|0|13|0|2|0|4	0	0.58
CG7047	FBgn0035103	Vdup1	CG10630	FBgn0035608	blanks	9.5	0|3|10|15|14|0|15|3|0|2|8	0	0.67
CG7047	FBgn0035103	Vdup1	CG4254	FBgn0011726	tsr	3	4|2|7|16|11|1|30|3|5|0|15	0	0.7
CG7047	FBgn0035103	Vdup1	CG7434	FBgn0015288	RpL22	11.5	6|0|7|7|8|3|13|1|2|0|8	0	0.62
CG7047	FBgn0035103	Vdup1	CG18811	FBgn0042134	Capr	10	0|0|0|5|7|0|5|0|0|0|6	0.04	0.39
CG7047	FBgn0035103	Vdup1	CG5787	FBgn0032454	CG5787	29	3|1|1|7|7|0|54|0|0|0|2	0	0.67
CG7047	FBgn0035103	Vdup1	CG4211	FBgn0004227	nonA	12	0|0|0|24|14|0|7|0|0|4|8	0	0.67
CG7047	FBgn0035103	Vdup1	CG3201	FBgn0004687	Mlc-c	3	10|0|7|1|3|2|8|2|2|1|6	0	0.65
CG7047	FBgn0035103	Vdup1	CG6946	FBgn0259139	glo	15	0|0|0|9|5|0|5|0|0|0|4	0.16	0.34
CG7047	FBgn0035103	Vdup1	CG1475	FBgn0037351	RpL13A	7	0|0|0|6|5|0|5|0|0|0|2	0	0.53
CG7047	FBgn0035103	Vdup1	CG15442	FBgn0285948	RpL27A	8	0|0|0|7|7|4|5|0|0|0|2	0	0.57
CG7047	FBgn0035103	Vdup1	CG4863	FBgn0020910	RpL3	18.5	2|0|3|14|10|0|10|0|0|0|5	0	0.59
CG7047	FBgn0035103	Vdup1	CG7808	FBgn0039713	RpS8	25	6|1|10|13|12|7|10|5|5|6|8	0.03	0.41
CG7047	FBgn0035103	Vdup1	CG4869	FBgn0003890	betaTub97EF	8.5	13|3|27|45|37|0|35|0|0|0|1	0	0.69
CG7047	FBgn0035103	Vdup1	CG1691	FBgn0285926	Imp	26	0|0|0|9|8|0|6|0|0|0|3	0.73	0.03
CG7047	FBgn0035103	Vdup1	CG4264	FBgn0266599	Hsc70-4	101	71|17|85|147|159|75|141|61|47|44|93	0	0.69
CG7047	FBgn0035103	Vdup1	CG3203	FBgn0029897	RpL17	7	0|0|0|6|5|2|4|0|0|0|1	0	0.48
CG7047	FBgn0035103	Vdup1	CG16944	FBgn0003360	sesB	23.5	24|4|25|33|34|26|19|28|33|25|19	0	0.69
CG7047	FBgn0035103	Vdup1	CG3379	FBgn0013981	His4r	1	2|0|1|0|0|0|3|0|0|0|1	0	0.7
CG7047	FBgn0035103	Vdup1	CG4898	FBgn0003721	Tm1	1	15|0|5|4|0|0|17|0|0|0|19	0	0.7
CG7047	FBgn0035103	Vdup1	CG6779	FBgn0002622	RpS3	31	40|2|33|36|37|36|30|15|31|25|17	0	0.69
CG7047	FBgn0035103	Vdup1	CG5827	FBgn0261608	RpL37A	6.5	1|0|2|2|3|2|3|3|0|0|2	0.36	0.28
CG7047	FBgn0035103	Vdup1	CG1263	FBgn0261602	RpL8	12.5	3|0|8|6|7|0|16|0|0|0|5	0	0.63
CG7047	FBgn0035103	Vdup1	CG4759	FBgn0039359	RpL27	10	0|0|3|5|3|0|12|0|0|0|3	0	0.54
CG7047	FBgn0035103	Vdup1	CG4897	FBgn0005593	RpL7	18.5	3|1|4|13|10|2|12|0|0|0|8	0	0.61
CG7047	FBgn0035103	Vdup1	CG1913	FBgn0003884	alphaTub84B	12.5	8|4|13|23|18|14|18|11|12|11|10	0	0.68
CG7047	FBgn0035103	Vdup1	CG7283	FBgn0036213	RpL10Ab	44.5	6|1|7|8|9|4|16|3|4|3|8	1	0
CG7047	FBgn0035103	Vdup1	CG3661	FBgn0010078	RpL23	46	38|4|28|52|56|53|46|34|17|9|32	0	0.69
CG7047	FBgn0035103	Vdup1	CG3849	FBgn0063485	Lasp	2.5	0|1|11|8|3|0|14|0|0|0|8	0	0.67
CG18744	FBgn0042101	CG18744	CG3395	FBgn0010408	RpS9	24.5	9|1|8|9|8|7|8|2|4|0|6	0.79	0.02
CG18744	FBgn0042101	CG18744	CG5502	FBgn0003279	RpL4	48.5	8|0|10|24|26|3|34|0|0|0|16	0	0.52
CG18744	FBgn0042101	CG18744	CG17870	FBgn0004907	14-3-3zeta	11	5|0|5|20|20|0|27|2|3|0|22	0	0.69
CG18744	FBgn0042101	CG18744	CG15693	FBgn0019936	RpS20	5.5	10|1|7|10|9|6|8|2|4|2|3	0	0.66
CG18744	FBgn0042101	CG18744	CG7939	FBgn0002626	RpL32	13.5	2|0|2|2|1|0|2|0|0|0|3	0.97	0.01
CG18744	FBgn0042101	CG18744	CG15697	FBgn0038834	RpS30	7	4|0|3|3|3|2|4|1|1|1|2	0.04	0.39
CG18744	FBgn0042101	CG18744	CG10811	FBgn0023213	eIF4G1	25.5	14|5|19|70|75|11|36|7|14|20|30	0	0.7
CG18744	FBgn0042101	CG18744	CG3949	FBgn0015393	hoip	6.5	3|0|2|4|3|2|50|2|2|1|3	0	0.68
CG18744	FBgn0042101	CG18744	CG10944	FBgn0261592	RpS6	14	3|0|5|8|7|4|7|5|2|1|5	0	0.47
CG18744	FBgn0042101	CG18744	CG6846	FBgn0036825	RpL26	17	2|0|3|1|3|2|6|0|0|0|5	0.98	0
CG18744	FBgn0042101	CG18744	CG8715	FBgn0020279	lig	3	2|0|11|11|13|1|13|1|0|0|6	0	0.7
CG18744	FBgn0042101	CG18744	CG9946	FBgn0261609	eIF2alpha	6.5	6|0|9|8|8|6|12|2|0|0|8	0	0.64
CG18744	FBgn0042101	CG18744	CG9412	FBgn0015778	rin	10.5	0|0|5|9|11|0|11|0|2|2|12	0	0.63
CG18744	FBgn0042101	CG18744	CG16901	FBgn0263396	sqd	3.5	2|0|7|7|4|0|8|0|2|2|5	0	0.63
CG18744	FBgn0042101	CG18744	CG3401	FBgn0003888	betaTub60D	16.5	64|0|87|80|55|74|52|34|20|22|9	0	0.7
CG18744	FBgn0042101	CG18744	CG1242	FBgn0001233	Hsp83	14.5	15|8|52|81|70|11|79|12|12|9|41	0	0.7
CG18744	FBgn0042101	CG18744	CG10686	FBgn0041775	tral	4	0|0|0|12|13|0|19|0|0|0|5	0	0.68
CG18744	FBgn0042101	CG18744	CG5119	FBgn0265297	pAbp	23	10|0|18|39|32|10|28|4|5|6|12	0	0.69
CG18744	FBgn0042101	CG18744	CG1524	FBgn0004403	RpS14a	16.5	9|0|7|13|13|13|10|9|10|8|7	0	0.63
CG18744	FBgn0042101	CG18744	CG1633	FBgn0040309	Jafrac1	2.5	6|2|8|15|11|2|23|2|2|0|15	0	0.7
CG18744	FBgn0042101	CG18744	CG4046	FBgn0034743	RpS16	19	14|0|14|13|16|20|14|10|15|9|12	0	0.66
CG18744	FBgn0042101	CG18744	CG11276	FBgn0011284	RpS4	29	11|1|3|29|25|10|22|6|9|5|7	0	0.68
CG18744	FBgn0042101	CG18744	CG12775	FBgn0032987	RpL21	17.5	0|0|3|7|12|2|15|1|4|0|4	0	0.55
CG18744	FBgn0042101	CG18744	CG3314	FBgn0014026	RpL7A	19.5	3|0|6|13|8|0|18|0|0|0|9	0	0.6
CG18744	FBgn0042101	CG18744	CG8415	FBgn0033912	RpS23	15.5	6|0|5|10|8|6|11|3|7|1|4	0	0.57
CG18744	FBgn0042101	CG18744	CG7726	FBgn0013325	RpL11	4	2|1|1|3|2|3|4|1|0|0|4	0	0.52
CG18744	FBgn0042101	CG18744	CG10777	FBgn0029979	mahe	1.5	0|0|0|9|9|0|7|0|0|0|3	0	0.66
CG18744	FBgn0042101	CG18744	CG3922	FBgn0005533	RpS17	13	13|0|8|17|13|16|10|7|10|5|3	0	0.67
CG18744	FBgn0042101	CG18744	CG5330	FBgn0015268	Nap1	5.5	7|0|7|15|7|4|10|2|0|0|4	0	0.66
CG18744	FBgn0042101	CG18744	CG2033	FBgn0010198	RpS15Aa	10	5|1|5|11|9|7|6|2|6|3|8	0	0.62
CG18744	FBgn0042101	CG18744	CG6141	FBgn0015756	RpL9	26	2|1|3|5|6|0|5|3|3|0|4	0.98	0
CG18744	FBgn0042101	CG18744	CG13389	FBgn0010265	RpS13	15.5	12|0|7|17|16|13|17|8|6|2|8	0	0.66
CG18744	FBgn0042101	CG18744	CG1821	FBgn0285949	RpL31	9	3|0|0|6|4|4|9|3|3|3|6	0	0.58
CG18744	FBgn0042101	CG18744	CG10279	FBgn0003261	Rm62	7.5	5|2|11|40|40|12|33|7|14|7|18	0	0.7
CG18744	FBgn0042101	CG18744	CG9277	FBgn0284243	betaTub56D	29.5	43|7|70|250|198|71|166|69|35|39|25	0	0.7
CG18744	FBgn0042101	CG18744	CG12740	FBgn0035422	RpL28	17	4|0|4|7|6|0|15|0|0|0|6	0	0.49
CG18744	FBgn0042101	CG18744	CG6253	FBgn0017579	RpL14	32	6|2|7|10|10|4|13|3|3|3|11	0.5	0.08
CG18744	FBgn0042101	CG18744	CG11844	FBgn0046214	vig2	12	0|1|4|13|16|0|19|0|4|4|8	0	0.67
CG18744	FBgn0042101	CG18744	CG8983	FBgn0033663	ERp60	4	4|5|16|45|36|0|36|3|4|2|24	0	0.7
CG18744	FBgn0042101	CG18744	CG15792	FBgn0265434	zip	24	138|18|165|76|86|16|147|47|5|3|84	0	0.7
CG18744	FBgn0042101	CG18744	CG4027	FBgn0000042	Act5C	61	0|22|0|93|85|0|0|60|36|22|78	0	0.69
CG18744	FBgn0042101	CG18744	CG17420	FBgn0028697	RpL15	3.5	0|0|4|3|3|0|4|0|0|0|2	0	0.53
CG18744	FBgn0042101	CG18744	CG3333	FBgn0259937	Nop60B	8.5	6|0|3|3|5|0|9|0|3|2|2	0	0.57
CG18744	FBgn0042101	CG18744	CG5519	FBgn0261119	Prp19	11	7|0|2|11|11|2|13|0|0|0|3	0	0.65
CG18744	FBgn0042101	CG18744	CG8280	FBgn0284245	eEF1alpha1	25	43|3|44|85|87|53|63|34|23|23|48	0	0.7
CG18744	FBgn0042101	CG18744	CG11999	FBgn0037312	CG11999	11.5	7|1|5|49|55|8|23|6|4|7|17	0	0.7
CG18744	FBgn0042101	CG18744	CG10305	FBgn0261597	RpS26	3	2|0|3|3|3|4|3|0|0|0|2	0	0.51
CG18744	FBgn0042101	CG18744	CG6203	FBgn0028734	Fmr1	5.5	0|0|0|2|4|0|9|0|0|0|7	0	0.54
CG18744	FBgn0042101	CG18744	CG9916	FBgn0004432	Cyp1	1	2|3|12|12|9|0|21|0|4|0|11	0	0.7
CG18744	FBgn0042101	CG18744	CG2998	FBgn0030136	RpS28b	5	3|0|1|2|2|2|4|2|3|2|3	0.01	0.44
CG18744	FBgn0042101	CG18744	CG2746	FBgn0285950	RpL19	5.5	0|0|0|8|5|0|8|0|0|0|1	0	0.61
CG18744	FBgn0042101	CG18744	CG7977	FBgn0026372	RpL23A	30	10|1|13|8|8|3|36|1|2|0|8	0	0.64
CG18744	FBgn0042101	CG18744	CG7622	FBgn0002579	RpL36	16	0|0|0|5|4|1|8|1|0|0|2	0.5	0.08
CG18744	FBgn0042101	CG18744	CG10423	FBgn0039300	RpS27	7	11|0|10|9|9|13|7|8|5|8|4	0	0.7
CG18744	FBgn0042101	CG18744	CG4035	FBgn0015218	eIF4E1	8.5	7|0|5|12|9|2|7|0|2|3|5	0	0.64
CG18744	FBgn0042101	CG18744	CG5654	FBgn0022959	yps	39	2|0|7|18|22|0|34|0|3|2|7	0	0.64
CG18744	FBgn0042101	CG18744	CG9983	FBgn0001215	Hrb98DE	1	0|0|0|4|5|0|8|0|0|0|2	0	0.63
CG18744	FBgn0042101	CG18744	CG8615	FBgn0035753	RpL18	21	0|0|6|11|11|2|10|0|0|0|7	0	0.52
CG18744	FBgn0042101	CG18744	CG8900	FBgn0010411	RpS18	15	28|2|17|15|11|36|13|8|14|11|11	0	0.69
CG18744	FBgn0042101	CG18744	CG42648	FBgn0285951	mRpS34	1.5	0|0|0|1|3|0|4|0|0|0|0	0	0.49
CG18744	FBgn0042101	CG18744	CG6684	FBgn0086472	RpS25	10.5	7|0|5|6|3|0|9|0|2|2|6	0	0.56
CG18744	FBgn0042101	CG18744	CG4337	FBgn0010438	mtSSB	2	23|3|33|3|3|2|8|0|0|0|7	0	0.7
CG18744	FBgn0042101	CG18744	CG10652	FBgn0086710	RpL30	15.5	2|0|3|2|7|1|10|1|1|1|2	0.23	0.31
CG18744	FBgn0042101	CG18744	CG4147	FBgn0001218	Hsc70-3	28	28|8|40|84|92|42|76|19|25|26|44	0	0.7
CG18744	FBgn0042101	CG18744	CG7439	FBgn0087035	AGO2	13.5	5|0|5|8|4|2|10|3|0|0|2	0.03	0.4
CG18744	FBgn0042101	CG18744	CG3751	FBgn0261596	RpS24	5	0|0|0|4|4|5|3|2|2|1|0	0	0.52
CG18744	FBgn0042101	CG18744	CG3056	FBgn0024987	ssx	2	0|0|0|9|9|0|4|0|0|0|3	0	0.65
CG18744	FBgn0042101	CG18744	CG17489	FBgn0064225	RpL5	14	4|0|3|8|12|2|12|0|2|1|6	0	0.59
CG18744	FBgn0042101	CG18744	CG8882	FBgn0015834	eIF3i	5	0|0|0|5|7|0|8|0|0|0|4	0	0.61
CG18744	FBgn0042101	CG18744	CG17521	FBgn0024733	RpL10	2	1|0|2|6|4|0|3|0|0|0|4	0	0.6
CG18744	FBgn0042101	CG18744	CG6143	FBgn0004401	Pep	32	9|1|8|21|21|0|72|2|2|0|14	0	0.69
CG18744	FBgn0042101	CG18744	CG9748	FBgn0263231	bel	7	4|1|6|39|27|3|18|0|3|8|11	0	0.7
CG18744	FBgn0042101	CG18744	CG6751	FBgn0263510	nclb	1.5	0|1|3|2|2|0|2|0|0|0|3	0	0.49
CG18744	FBgn0042101	CG18744	CG4679	FBgn0033816	CG4679	2.5	0|0|0|4|2|0|2|0|0|0|1	0	0.48
CG18744	FBgn0042101	CG18744	CG1883	FBgn0039757	RpS7	15.5	22|0|12|27|28|36|19|19|13|7|8	0	0.7
CG18744	FBgn0042101	CG18744	CG5920	FBgn0004867	RpS2	25.5	9|1|8|15|9|6|10|3|5|6|8	0.33	0.29
CG18744	FBgn0042101	CG18744	CG6341	FBgn0028737	eEF1beta	3	7|1|8|11|11|2|12|0|3|0|9	0	0.7
CG18744	FBgn0042101	CG18744	CG4651	FBgn0011272	RpL13	18.5	5|5|6|9|7|2|13|4|3|0|5	0.22	0.33
CG18744	FBgn0042101	CG18744	CG2168	FBgn0017545	RpS3A	33	22|2|17|32|35|31|30|26|15|5|23	0	0.68
CG18744	FBgn0042101	CG18744	CG7111	FBgn0020618	Rack1	2	0|0|9|7|6|4|7|2|1|4|8	0	0.7
CG18744	FBgn0042101	CG18744	CG9282	FBgn0032518	RpL24	9.5	3|0|1|7|7|2|7|1|2|2|2	0	0.57
CG18744	FBgn0042101	CG18744	CG8332	FBgn0034138	RpS15	19	5|1|2|16|12|16|13|3|9|4|5	0	0.65
CG18744	FBgn0042101	CG18744	CG14648	FBgn0263594	lost	10	3|1|13|23|12|3|17|2|0|0|14	0	0.68
CG18744	FBgn0042101	CG18744	CG1101	FBgn0010774	Ref1	7.5	1|0|2|4|4|0|20|0|0|0|8	0	0.65
CG18744	FBgn0042101	CG18744	CG11522	FBgn0039857	RpL6	21	1|0|4|12|12|0|13|0|2|0|4	0	0.5
CG18744	FBgn0042101	CG18744	CG10630	FBgn0035608	blanks	7	0|3|10|15|14|0|15|3|0|2|8	0	0.67
CG18744	FBgn0042101	CG18744	CG7434	FBgn0015288	RpL22	9.5	6|0|7|7|8|3|13|1|2|0|8	0	0.62
CG18744	FBgn0042101	CG18744	CG18811	FBgn0042134	Capr	8.5	0|0|0|5|7|0|5|0|0|0|6	0	0.52
CG18744	FBgn0042101	CG18744	CG5787	FBgn0032454	CG5787	7	3|1|1|7|7|0|54|0|0|0|2	0	0.69
CG18744	FBgn0042101	CG18744	CG4211	FBgn0004227	nonA	4.5	0|0|0|24|14|0|7|0|0|4|8	0	0.7
CG18744	FBgn0042101	CG18744	CG3201	FBgn0004687	Mlc-c	4	10|0|7|1|3|2|8|2|2|1|6	0	0.65
CG18744	FBgn0042101	CG18744	CG6946	FBgn0259139	glo	1.5	0|0|0|9|5|0|5|0|0|0|4	0	0.63
CG18744	FBgn0042101	CG18744	CG1475	FBgn0037351	RpL13A	5.5	0|0|0|6|5|0|5|0|0|0|2	0	0.56
CG18744	FBgn0042101	CG18744	CG15442	FBgn0285948	RpL27A	6	0|0|0|7|7|4|5|0|0|0|2	0	0.58
CG18744	FBgn0042101	CG18744	CG4863	FBgn0020910	RpL3	14.5	2|0|3|14|10|0|10|0|0|0|5	0	0.59
CG18744	FBgn0042101	CG18744	CG7808	FBgn0039713	RpS8	32	6|1|10|13|12|7|10|5|5|6|8	0.5	0.08
CG18744	FBgn0042101	CG18744	CG1691	FBgn0285926	Imp	25	0|0|0|9|8|0|6|0|0|0|3	0.99	0
CG18744	FBgn0042101	CG18744	CG4264	FBgn0266599	Hsc70-4	56	71|17|85|147|159|75|141|61|47|44|93	0	0.7
CG18744	FBgn0042101	CG18744	CG3203	FBgn0029897	RpL17	3.5	0|0|0|6|5|2|4|0|0|0|1	0	0.58
CG18744	FBgn0042101	CG18744	CG16944	FBgn0003360	sesB	21.5	24|4|25|33|34|26|19|28|33|25|19	0	0.7
CG18744	FBgn0042101	CG18744	CG3379	FBgn0013981	His4r	1.5	2|0|1|0|0|0|3|0|0|0|1	0	0.46
CG18744	FBgn0042101	CG18744	CG4898	FBgn0003721	Tm1	1.5	15|0|5|4|0|0|17|0|0|0|19	0	0.7
CG18744	FBgn0042101	CG18744	CG6779	FBgn0002622	RpS3	31.5	40|2|33|36|37|36|30|15|31|25|17	0	0.69
CG18744	FBgn0042101	CG18744	CG5827	FBgn0261608	RpL37A	3	1|0|2|2|3|2|3|3|0|0|2	0	0.48
CG18744	FBgn0042101	CG18744	CG1263	FBgn0261602	RpL8	14.5	3|0|8|6|7|0|16|0|0|0|5	0	0.57
CG18744	FBgn0042101	CG18744	CG4759	FBgn0039359	RpL27	9	0|0|3|5|3|0|12|0|0|0|3	0	0.5
CG18744	FBgn0042101	CG18744	CG4897	FBgn0005593	RpL7	25	3|1|4|13|10|2|12|0|0|0|8	0.03	0.41
CG18744	FBgn0042101	CG18744	CG1913	FBgn0003884	alphaTub84B	8	8|4|13|23|18|14|18|11|12|11|10	0	0.7
CG18744	FBgn0042101	CG18744	CG7283	FBgn0036213	RpL10Ab	50.5	6|1|7|8|9|4|16|3|4|3|8	1	0
CG18744	FBgn0042101	CG18744	CG3661	FBgn0010078	RpL23	34	38|4|28|52|56|53|46|34|17|9|32	0	0.69
CG2641	FBgn0037518	CG2641	CG3395	FBgn0010408	RpS9	4.5	9|1|8|9|8|7|8|2|4|0|6	0	0.7
CG2641	FBgn0037518	CG2641	CG5502	FBgn0003279	RpL4	3.5	8|0|10|24|26|3|34|0|0|0|16	0	0.7
CG2641	FBgn0037518	CG2641	CG7380	FBgn0031977	baf	1	62|3|27|1|1|1|5|4|1|1|3	0	0.7
CG2641	FBgn0037518	CG2641	CG17870	FBgn0004907	14-3-3zeta	7	5|0|5|20|20|0|27|2|3|0|22	0	0.69
CG2641	FBgn0037518	CG2641	CG15693	FBgn0019936	RpS20	7	10|1|7|10|9|6|8|2|4|2|3	0	0.65
CG2641	FBgn0037518	CG2641	CG7939	FBgn0002626	RpL32	1	2|0|2|2|1|0|2|0|0|0|3	0	0.49
CG2641	FBgn0037518	CG2641	CG15697	FBgn0038834	RpS30	1	4|0|3|3|3|2|4|1|1|1|2	0	0.7
CG2641	FBgn0037518	CG2641	CG10811	FBgn0023213	eIF4G1	57	14|5|19|70|75|11|36|7|14|20|30	0	0.69
CG2641	FBgn0037518	CG2641	CG3949	FBgn0015393	hoip	2	3|0|2|4|3|2|50|2|2|1|3	0	0.7
CG2641	FBgn0037518	CG2641	CG10944	FBgn0261592	RpS6	3.5	3|0|5|8|7|4|7|5|2|1|5	0	0.7
CG2641	FBgn0037518	CG2641	CG6846	FBgn0036825	RpL26	1.5	2|0|3|1|3|2|6|0|0|0|5	0	0.7
CG2641	FBgn0037518	CG2641	CG8715	FBgn0020279	lig	4	2|0|11|11|13|1|13|1|0|0|6	0	0.67
CG2641	FBgn0037518	CG2641	CG9946	FBgn0261609	eIF2alpha	13.5	6|0|9|8|8|6|12|2|0|0|8	0	0.57
CG2641	FBgn0037518	CG2641	CG9412	FBgn0015778	rin	4.5	0|0|5|9|11|0|11|0|2|2|12	0	0.66
CG2641	FBgn0037518	CG2641	CG6995	FBgn0039229	Saf-B	4.5	0|0|0|5|6|0|9|0|0|0|2	0	0.62
CG2641	FBgn0037518	CG2641	CG16901	FBgn0263396	sqd	5	2|0|7|7|4|0|8|0|2|2|5	0	0.62
CG2641	FBgn0037518	CG2641	CG3401	FBgn0003888	betaTub60D	30	64|0|87|80|55|74|52|34|20|22|9	0	0.7
CG2641	FBgn0037518	CG2641	CG9916	FBgn0004432	Cyp1	3	2|3|12|12|9|0|21|0|4|0|11	0	0.7
CG2641	FBgn0037518	CG2641	CG10686	FBgn0041775	tral	5	0|0|0|12|13|0|19|0|0|0|5	0	0.68
CG2641	FBgn0037518	CG2641	CG5119	FBgn0265297	pAbp	17.5	10|0|18|39|32|10|28|4|5|6|12	0	0.69
CG2641	FBgn0037518	CG2641	CG1524	FBgn0004403	RpS14a	9	9|0|7|13|13|13|10|9|10|8|7	0	0.67
CG2641	FBgn0037518	CG2641	CG1633	FBgn0040309	Jafrac1	4.5	6|2|8|15|11|2|23|2|2|0|15	0	0.7
CG2641	FBgn0037518	CG2641	CG4046	FBgn0034743	RpS16	16	14|0|14|13|16|20|14|10|15|9|12	0	0.67
CG2641	FBgn0037518	CG2641	CG11276	FBgn0011284	RpS4	12	11|1|3|29|25|10|22|6|9|5|7	0	0.69
CG2641	FBgn0037518	CG2641	CG12775	FBgn0032987	RpL21	3.5	0|0|3|7|12|2|15|1|4|0|4	0	0.7
CG2641	FBgn0037518	CG2641	CG3314	FBgn0014026	RpL7A	1.5	3|0|6|13|8|0|18|0|0|0|9	0	0.7
CG2641	FBgn0037518	CG2641	CG10203	FBgn0028554	x16	1	0|0|0|4|4|0|2|0|0|0|2	0	0.7
CG2641	FBgn0037518	CG2641	CG8415	FBgn0033912	RpS23	5.5	6|0|5|10|8|6|11|3|7|1|4	0	0.65
CG2641	FBgn0037518	CG2641	CG7726	FBgn0013325	RpL11	2	2|1|1|3|2|3|4|1|0|0|4	0	0.57
CG2641	FBgn0037518	CG2641	CG10777	FBgn0029979	mahe	3	0|0|0|9|9|0|7|0|0|0|3	0	0.64
CG2641	FBgn0037518	CG2641	CG3922	FBgn0005533	RpS17	11.5	13|0|8|17|13|16|10|7|10|5|3	0	0.67
CG2641	FBgn0037518	CG2641	CG5330	FBgn0015268	Nap1	7.5	7|0|7|15|7|4|10|2|0|0|4	0	0.65
CG2641	FBgn0037518	CG2641	CG2033	FBgn0010198	RpS15Aa	6.5	5|1|5|11|9|7|6|2|6|3|8	0	0.65
CG2641	FBgn0037518	CG2641	CG10377	FBgn0004838	Hrb27C	2.5	1|1|3|7|1|0|9|0|0|0|1	0	0.63
CG2641	FBgn0037518	CG2641	CG6141	FBgn0015756	RpL9	1.5	2|1|3|5|6|0|5|3|3|0|4	0	0.61
CG2641	FBgn0037518	CG2641	CG13389	FBgn0010265	RpS13	5	12|0|7|17|16|13|17|8|6|2|8	0	0.7
CG2641	FBgn0037518	CG2641	CG1821	FBgn0285949	RpL31	2	3|0|0|6|4|4|9|3|3|3|6	0	0.7
CG2641	FBgn0037518	CG2641	CG10279	FBgn0003261	Rm62	25.5	5|2|11|40|40|12|33|7|14|7|18	0	0.69
CG2641	FBgn0037518	CG2641	CG9277	FBgn0284243	betaTub56D	51	43|7|70|250|198|71|166|69|35|39|25	0	0.7
CG2641	FBgn0037518	CG2641	CG12740	FBgn0035422	RpL28	1	4|0|4|7|6|0|15|0|0|0|6	0	0.7
CG2641	FBgn0037518	CG2641	CG6253	FBgn0017579	RpL14	4	6|2|7|10|10|4|13|3|3|3|11	0	0.7
CG2641	FBgn0037518	CG2641	CG11844	FBgn0046214	vig2	3.5	0|1|4|13|16|0|19|0|4|4|8	0	0.7
CG2641	FBgn0037518	CG2641	CG8983	FBgn0033663	ERp60	11.5	4|5|16|45|36|0|36|3|4|2|24	0	0.69
CG2641	FBgn0037518	CG2641	CG15792	FBgn0265434	zip	20.5	138|18|165|76|86|16|147|47|5|3|84	0	0.7
CG2641	FBgn0037518	CG2641	CG3333	FBgn0259937	Nop60B	6	6|0|3|3|5|0|9|0|3|2|2	0	0.59
CG2641	FBgn0037518	CG2641	CG8280	FBgn0284245	eEF1alpha1	31.5	43|3|44|85|87|53|63|34|23|23|48	0	0.7
CG2641	FBgn0037518	CG2641	CG11999	FBgn0037312	CG11999	7.5	7|1|5|49|55|8|23|6|4|7|17	0	0.7
CG2641	FBgn0037518	CG2641	CG10305	FBgn0261597	RpS26	1	2|0|3|3|3|4|3|0|0|0|2	0	0.56
CG2641	FBgn0037518	CG2641	CG6203	FBgn0028734	Fmr1	1	0|0|0|2|4|0|9|0|0|0|7	0	0.7
CG2641	FBgn0037518	CG2641	CG9075	FBgn0001942	eIF4A	3.5	1|0|6|20|12|1|16|2|0|0|8	0	0.7
CG2641	FBgn0037518	CG2641	CG2998	FBgn0030136	RpS28b	2	3|0|1|2|2|2|4|2|3|2|3	0	0.7
CG2641	FBgn0037518	CG2641	CG2746	FBgn0285950	RpL19	1	0|0|0|8|5|0|8|0|0|0|1	0	0.7
CG2641	FBgn0037518	CG2641	CG7977	FBgn0026372	RpL23A	4	10|1|13|8|8|3|36|1|2|0|8	0	0.7
CG2641	FBgn0037518	CG2641	CG7622	FBgn0002579	RpL36	2	0|0|0|5|4|1|8|1|0|0|2	0	0.63
CG2641	FBgn0037518	CG2641	CG10423	FBgn0039300	RpS27	7.5	11|0|10|9|9|13|7|8|5|8|4	0	0.66
CG2641	FBgn0037518	CG2641	CG4035	FBgn0015218	eIF4E1	8.5	7|0|5|12|9|2|7|0|2|3|5	0	0.64
CG2641	FBgn0037518	CG2641	CG5654	FBgn0022959	yps	3.5	2|0|7|18|22|0|34|0|3|2|7	0	0.7
CG2641	FBgn0037518	CG2641	CG9983	FBgn0001215	Hrb98DE	3	0|0|0|4|5|0|8|0|0|0|2	0	0.61
CG2641	FBgn0037518	CG2641	CG8615	FBgn0035753	RpL18	2	0|0|6|11|11|2|10|0|0|0|7	0	0.7
CG2641	FBgn0037518	CG2641	CG8900	FBgn0010411	RpS18	19.5	28|2|17|15|11|36|13|8|14|11|11	0	0.69
CG2641	FBgn0037518	CG2641	CG6684	FBgn0086472	RpS25	3	7|0|5|6|3|0|9|0|2|2|6	0	0.64
CG2641	FBgn0037518	CG2641	CG4337	FBgn0010438	mtSSB	2.5	23|3|33|3|3|2|8|0|0|0|7	0	0.7
CG2641	FBgn0037518	CG2641	CG9862	FBgn0034646	Rae1	1.5	0|0|0|5|2|0|9|0|0|0|1	0	0.62
CG2641	FBgn0037518	CG2641	CG4147	FBgn0001218	Hsc70-3	47	28|8|40|84|92|42|76|19|25|26|44	0	0.69
CG2641	FBgn0037518	CG2641	CG7439	FBgn0087035	AGO2	10	5|0|5|8|4|2|10|3|0|0|2	0	0.59
CG2641	FBgn0037518	CG2641	CG3751	FBgn0261596	RpS24	3.5	0|0|0|4|4|5|3|2|2|1|0	0	0.57
CG2641	FBgn0037518	CG2641	CG3056	FBgn0024987	ssx	2	0|0|0|9|9|0|4|0|0|0|3	0	0.65
CG2641	FBgn0037518	CG2641	CG17489	FBgn0064225	RpL5	2.5	4|0|3|8|12|2|12|0|2|1|6	0	0.7
CG2641	FBgn0037518	CG2641	CG8882	FBgn0015834	eIF3i	1	0|0|0|5|7|0|8|0|0|0|4	0	0.7
CG2641	FBgn0037518	CG2641	CG17521	FBgn0024733	RpL10	1	1|0|2|6|4|0|3|0|0|0|4	0	0.7
CG2641	FBgn0037518	CG2641	CG6143	FBgn0004401	Pep	4	9|1|8|21|21|0|72|2|2|0|14	0	0.7
CG2641	FBgn0037518	CG2641	CG9748	FBgn0263231	bel	23.5	4|1|6|39|27|3|18|0|3|8|11	0	0.68
CG2641	FBgn0037518	CG2641	CG1242	FBgn0001233	Hsp83	20.5	15|8|52|81|70|11|79|12|12|9|41	0	0.7
CG2641	FBgn0037518	CG2641	CG1883	FBgn0039757	RpS7	13	22|0|12|27|28|36|19|19|13|7|8	0	0.7
CG2641	FBgn0037518	CG2641	CG5920	FBgn0004867	RpS2	7.5	9|1|8|15|9|6|10|3|5|6|8	0	0.66
CG2641	FBgn0037518	CG2641	CG1404	FBgn0020255	Ran	1	2|3|2|16|15|3|32|2|0|0|5	0	0.7
CG2641	FBgn0037518	CG2641	CG6341	FBgn0028737	eEF1beta	3.5	7|1|8|11|11|2|12|0|3|0|9	0	0.7
CG2641	FBgn0037518	CG2641	CG4651	FBgn0011272	RpL13	5	5|5|6|9|7|2|13|4|3|0|5	0	0.65
CG2641	FBgn0037518	CG2641	CG2168	FBgn0017545	RpS3A	12.5	22|2|17|32|35|31|30|26|15|5|23	0	0.7
CG2641	FBgn0037518	CG2641	CG7111	FBgn0020618	Rack1	1.5	0|0|9|7|6|4|7|2|1|4|8	0	0.7
CG2641	FBgn0037518	CG2641	CG9282	FBgn0032518	RpL24	1	3|0|1|7|7|2|7|1|2|2|2	0	0.7
CG2641	FBgn0037518	CG2641	CG8332	FBgn0034138	RpS15	16.5	5|1|2|16|12|16|13|3|9|4|5	0	0.66
CG2641	FBgn0037518	CG2641	CG14648	FBgn0263594	lost	5.5	3|1|13|23|12|3|17|2|0|0|14	0	0.7
CG2641	FBgn0037518	CG2641	CG1101	FBgn0010774	Ref1	1	1|0|2|4|4|0|20|0|0|0|8	0	0.7
CG2641	FBgn0037518	CG2641	CG11522	FBgn0039857	RpL6	3	1|0|4|12|12|0|13|0|2|0|4	0	0.7
CG2641	FBgn0037518	CG2641	CG10630	FBgn0035608	blanks	4.5	0|3|10|15|14|0|15|3|0|2|8	0	0.7
CG2641	FBgn0037518	CG2641	CG4254	FBgn0011726	tsr	5	4|2|7|16|11|1|30|3|5|0|15	0	0.7
CG2641	FBgn0037518	CG2641	CG7434	FBgn0015288	RpL22	3	6|0|7|7|8|3|13|1|2|0|8	0	0.7
CG2641	FBgn0037518	CG2641	CG18811	FBgn0042134	Capr	5	0|0|0|5|7|0|5|0|0|0|6	0	0.58
CG2641	FBgn0037518	CG2641	CG5787	FBgn0032454	CG5787	5.5	3|1|1|7|7|0|54|0|0|0|2	0	0.69
CG2641	FBgn0037518	CG2641	CG4211	FBgn0004227	nonA	1.5	0|0|0|24|14|0|7|0|0|4|8	0	0.7
CG2641	FBgn0037518	CG2641	CG3201	FBgn0004687	Mlc-c	4	10|0|7|1|3|2|8|2|2|1|6	0	0.65
CG2641	FBgn0037518	CG2641	CG15442	FBgn0285948	RpL27A	3	0|0|0|7|7|4|5|0|0|0|2	0	0.62
CG2641	FBgn0037518	CG2641	CG4863	FBgn0020910	RpL3	2.5	2|0|3|14|10|0|10|0|0|0|5	0	0.7
CG2641	FBgn0037518	CG2641	CG7808	FBgn0039713	RpS8	9.5	6|1|10|13|12|7|10|5|5|6|8	0	0.66
CG2641	FBgn0037518	CG2641	CG4869	FBgn0003890	betaTub97EF	10	13|3|27|45|37|0|35|0|0|0|1	0	0.69
CG2641	FBgn0037518	CG2641	CG1691	FBgn0285926	Imp	3	0|0|0|9|8|0|6|0|0|0|3	0	0.64
CG2641	FBgn0037518	CG2641	CG4264	FBgn0266599	Hsc70-4	82.5	71|17|85|147|159|75|141|61|47|44|93	0	0.69
CG2641	FBgn0037518	CG2641	CG3203	FBgn0029897	RpL17	1.5	0|0|0|6|5|2|4|0|0|0|1	0	0.62
CG2641	FBgn0037518	CG2641	CG16944	FBgn0003360	sesB	45	24|4|25|33|34|26|19|28|33|25|19	0	0.68
CG2641	FBgn0037518	CG2641	CG3379	FBgn0013981	His4r	1	2|0|1|0|0|0|3|0|0|0|1	0	0.46
CG2641	FBgn0037518	CG2641	CG6779	FBgn0002622	RpS3	34.5	40|2|33|36|37|36|30|15|31|25|17	0	0.69
CG2641	FBgn0037518	CG2641	CG1263	FBgn0261602	RpL8	1.5	3|0|8|6|7|0|16|0|0|0|5	0	0.7
CG2641	FBgn0037518	CG2641	CG4759	FBgn0039359	RpL27	2.5	0|0|3|5|3|0|12|0|0|0|3	0	0.63
CG2641	FBgn0037518	CG2641	CG4897	FBgn0005593	RpL7	1	3|1|4|13|10|2|12|0|0|0|8	0	0.7
CG2641	FBgn0037518	CG2641	CG1913	FBgn0003884	alphaTub84B	16.5	8|4|13|23|18|14|18|11|12|11|10	0	0.68
CG2641	FBgn0037518	CG2641	CG7283	FBgn0036213	RpL10Ab	3.5	6|1|7|8|9|4|16|3|4|3|8	0	0.7
CG2641	FBgn0037518	CG2641	CG3661	FBgn0010078	RpL23	12.5	38|4|28|52|56|53|46|34|17|9|32	0	0.7
