# Supplementary material for: Comparative interactome analysis of α-arrestin families in human and Drosophila
Source: eLife. 2024 Jan 25;12:RP88328. doi: 10.7554/eLife.88328 (PMC10945707; doi:10.7554/eLife.88328)
Supplement: Supplementary file 3. — Summary tables of SAINTexpress results for human (A) and Drosophila (B). [file elife-88328-supp3.xlsx]

## Sheet: A. Human PPIs(SAINTexpress)
Bait (HGNC ID)	Prey (HGNC ID)	Spec	SpecSum	AvgSpec	NumReplicates	ctrlCounts	SAINTexpress scores	logOddsScore	FoldChange	BFDR	High-confidence PPIs
ARRDC4	XPOT	14|15	29	14.5	2	3|0|0|0|2|2|2|0|0	1	8.65	6.21	0	Yes
ARRDC4	PSMD13	9|11	20	10	2	0|3|4|0|0|0|0|0|0	0.92	1.91	4.29	0.01	Yes
ARRDC4	ANKRD13A	50|40	90	45	2	0|0|0|0|0|0|0|0|0	1	60.66	450	0	Yes
ARRDC4	NDFIP1	8|6	14	7	2	0|0|0|0|0|0|0|0|0	1	10.31	70	0	Yes
ARRDC4	SVIL	7|7	14	7	2	0|0|0|0|2|0|0|0|0	0.98	3.87	10.5	0.01	Yes
ARRDC4	PJA2	6|6	12	6	2	0|0|0|0|0|2|2|0|0	0.97	3.46	4.5	0.01	Yes
ARRDC4	BAG2	12|12	24	12	2	2|0|0|2|2|2|4|0|0	1	5.53	4.5	0	Yes
ARRDC4	BAG6	54|42	96	48	2	0|0|0|4|0|1|0|0|0	1	15.75	28.8	0	Yes
ARRDC4	MYO1D	8|8	16	8	2	0|0|0|0|3|0|0|0|0	0.95	2.86	8	0.01	Yes
ARRDC4	MYO1B	17|18	35	17.5	2	5|0|5|0|6|0|3|0|0	0.98	3.63	3.28	0	Yes
ARRDC4	PSMA3	6|7	13	6.5	2	0|3|2|0|0|0|0|0|0	0.85	1.35	3.9	0.01	Yes
ARRDC4	DSG2	43|38	81	40.5	2	0|0|0|0|0|0|0|0|0	1	57.78	405	0	Yes
ARRDC4	KIF16B	9|7	16	8	2	1|0|0|0|3|0|0|0|0	0.95	2.51	6	0.01	Yes
ARRDC4	POLR2A	15|15	30	15	2	0|0|0|0|0|0|0|0|0	1	24.18	150	0	Yes
ARRDC4	PSMB5	11|9	20	10	2	0|2|2|2|0|2|1|0|0	0.99	4.03	5	0	Yes
ARRDC4	PSMB3	11|7	18	9	2	0|0|4|0|0|0|0|0|0	0.91	1.81	6.75	0.01	Yes
ARRDC4	PSMB2	10|12	22	11	2	0|2|1|2|0|0|2|1|1	1	5.09	5.5	0	Yes
ARRDC4	LTN1	15|16	31	15.5	2	0|2|0|1|0|0|2|2|0	1	10.94	7.75	0	Yes
ARRDC4	ANKIB1	6|9	15	7.5	2	0|0|0|0|0|0|0|0|0	1	10.31	75	0	Yes
ARRDC4	JAK1	8|6	14	7	2	0|0|0|0|0|0|0|0|0	1	10.31	70	0	Yes
ARRDC4	ITCH	12|11	23	11.5	2	0|0|0|0|0|0|0|0|0	1	18.14	115	0	Yes
ARRDC4	PSMC5	24|23	47	23.5	2	5|8|11|3|0|4|6|2|0	0.89	1.67	2.82	0.01	Yes
ARRDC4	ATM	11|7	18	9	2	0|0|0|0|0|0|0|0|0	1	11.92	90	0	Yes
ARRDC4	FANCI	23|23	46	23	2	0|2|0|3|0|4|11|2|0	0.93	2.59	3.83	0.01	Yes
ARRDC4	WWP2	8|8	16	8	2	0|0|0|0|0|0|0|0|0	1	13.5	80	0	Yes
ARRDC4	WWP1	14|10	24	12	2	0|0|0|0|0|0|0|0|0	1	16.6	120	0	Yes
ARRDC4	MAP1B	20|19	39	19.5	2	2|0|0|4|2|0|0|0|0	1	13.42	7.31	0	Yes
ARRDC4	GNAS	6|6	12	6	2	0|0|0|3|0|0|0|0|0	0.87	1.95	6	0.01	Yes
ARRDC4	RAB9A	10|7	17	8.5	2	0|0|0|0|0|3|3|0|0	0.89	1.36	4.25	0.01	Yes
ARRDC4	MMS19	6|7	13	6.5	2	0|0|0|0|0|0|3|0|0	0.9	1.95	6.5	0.01	Yes
ARRDC4	IPO9	28|23	51	25.5	2	0|0|0|0|0|0|0|0|0	1	36.01	255	0	Yes
ARRDC4	IPO4	12|8	20	10	2	0|0|0|0|0|0|0|0|0	1	13.5	100	0	Yes
ARRDC4	PTPRF	31|29	60	30	2	0|0|0|0|0|0|0|0|0	1	44.77	300	0	Yes
ARRDC4	NEDD4L	40|30	70	35	2	0|0|0|0|0|0|0|0|0	1	46.22	350	0	Yes
ARRDC4	NF1	12|11	23	11.5	2	0|0|0|0|0|0|0|0|0	1	18.14	115	0	Yes
ARRDC4	SMC2	14|13	27	13.5	2	2|2|2|4|0|0|2|0|0	1	6.59	5.06	0	Yes
ARRDC4	SMC4	17|19	36	18	2	0|0|0|4|0|0|3|0|0	1	6.9	7.71	0	Yes
ARRDC4	CAD	88|75	163	81.5	2	7|6|3|8|8|12|27|11|4	1	6.87	4.89	0	Yes
ARRDC4	PELO	6|6	12	6	2	0|0|0|0|0|0|0|0|0	1	10.31	60	0	Yes
ARRDC4	UBL4A	7|6	13	6.5	2	0|0|0|0|0|0|0|0|0	1	10.31	65	0	Yes
ARRDC4	GCN1	63|47	110	55	2	7|10|11|15|5|9|20|11|0	1	7.83	3.59	0	Yes
ARRDC4	SLC20A1	7|6	13	6.5	2	0|0|0|0|0|0|0|0|0	1	10.31	65	0	Yes
ARRDC4	SUGT1	12|11	23	11.5	2	0|0|0|0|0|0|0|0|0	1	18.14	115	0	Yes
ARRDC4	TFRC	27|24	51	25.5	2	0|4|4|3|0|0|3|0|0	1	16.01	6.95	0	Yes
ARRDC4	PPP6R3	9|6	15	7.5	2	0|0|0|0|0|0|0|0|0	1	10.31	75	0	Yes
ARRDC4	MAGED2	15|11	26	13	2	0|3|0|3|2|3|3|4|2	0.96	2.52	3.9	0.01	Yes
ARRDC4	PLXNB2	15|10	25	12.5	2	0|0|0|0|0|0|0|0|0	1	16.6	125	0	Yes
ARRDC4	PEX1	11|9	20	10	2	0|0|0|1|0|2|3|0|0	0.99	4.03	5	0	Yes
ARRDC4	EPHA2	6|8	14	7	2	0|0|0|0|0|0|0|0|0	1	10.31	70	0	Yes
ARRDC4	PTPRS	18|12	30	15	2	0|0|0|0|0|0|0|0|0	1	19.66	150	0	Yes
ARRDC4	UBE3C	13|8	21	10.5	2	0|0|0|0|0|1|3|0|0	0.98	3.24	7.88	0.01	Yes
ARRDC4	CPD	11|10	21	10.5	2	0|0|0|3|0|0|0|0|0	0.98	3.71	10.5	0.01	Yes
ARRDC4	MON2	13|14	27	13.5	2	0|0|0|1|0|1|5|0|0	0.98	3.66	5.79	0.01	Yes
ARRDC4	GET4	12|19	31	15.5	2	0|0|0|0|0|0|0|0|0	1	19.66	155	0	Yes
ARRDC4	ABCA3	6|7	13	6.5	2	0|0|0|0|0|0|0|0|0	1	10.31	65	0	Yes
ARRDC4	PSMD8	6|6	12	6	2	0|0|0|0|0|0|0|0|0	1	10.31	60	0	Yes
ARRDC4	PSMD4	10|11	21	10.5	2	0|0|0|4|0|0|0|0|0	0.95	2.84	7.88	0.01	Yes
ARRDC4	PSMD1	29|27	56	28	2	0|3|9|3|0|0|1|0|0	1	6.49	5.6	0	Yes
ARRDC4	PSMD2	28|22	50	25	2	0|6|11|3|0|2|4|0|0	0.93	1.86	3.57	0.01	Yes
ARRDC4	MYO6	8|6	14	7	2	0|0|0|0|0|0|0|0|0	1	10.31	70	0	Yes
ARRDC4	HUWE1	51|37	88	44	2	0|0|0|0|0|0|0|0|0	1	56.34	440	0	Yes
ARRDC4	SLC12A2	20|14	34	17	2	0|0|0|0|0|0|0|0|0	1	22.68	170	0	Yes
ARRDC4	PI4KA	7|7	14	7	2	0|0|0|0|0|0|0|0|0	1	11.92	70	0	Yes
ARRDC4	FANCD2	10|8	18	9	2	0|0|0|2|0|0|4|0|0	0.9	1.75	4.5	0.01	Yes
ARRDC4	RNF31	10|7	17	8.5	2	0|0|0|0|0|0|0|0|0	1	11.92	85	0	Yes
ARRDC4	ABCB1	8|6	14	7	2	0|0|0|0|0|0|0|0|0	1	10.31	70	0	Yes
ARRDC4	HERC2	18|23	41	20.5	2	0|0|0|0|0|0|0|0|0	1	28.65	205	0	Yes
ARRDC4	BMPR1A	9|12	21	10.5	2	0|0|0|0|0|0|0|0|0	1	15.06	105	0	Yes
ARRDC4	RBCK1	6|7	13	6.5	2	0|0|0|0|0|0|0|0|0	1	10.31	65	0	Yes
ARRDC4	MTR	8|9	17	8.5	2	0|0|0|0|0|0|0|0|0	1	13.5	85	0	Yes
ARRDC4	RHOBTB3	6|10	16	8	2	0|0|0|0|0|2|3|0|0	0.89	1.35	4.8	0.01	Yes
ARRDC4	BAT3	13|10	23	11.5	2	0|0|0|0|0|0|0|0|0	1	16.6	115	0	Yes
ARRDC4	ARFGEF3	13|9	22	11	2	0|0|0|0|0|0|0|0|0	1	15.06	110	0	Yes
ARRDC4	CAND2	10|7	17	8.5	2	0|0|0|2|0|1|2|0|0	0.97	2.73	5.1	0.01	Yes
ARRDC4	LRP10	7|8	15	7.5	2	0|0|0|0|0|0|0|0|0	1	11.92	75	0	Yes
ARRDC4	LRP12	7|6	13	6.5	2	0|0|0|0|0|0|0|0|0	1	10.31	65	0	Yes
ARRDC5	ABCD3	13|21	34	17	2	0|5|4|0|0|0|4|1|0	0.93	1.87	3.92	0.01	Yes
ARRDC5	ATP6V0D1	28|24	52	26	2	0|0|0|0|0|0|0|0|0	1	37.48	260	0	Yes
ARRDC5	DSG2	28|16	44	22	2	0|0|0|0|0|0|0|0|0	1	25.68	220	0	Yes
ARRDC5	ABCG2	7|10	17	8.5	2	0|0|0|0|0|0|0|0|0	1	11.92	85	0	Yes
ARRDC5	ATP6V1B2	95|80	175	87.5	2	0|3|9|0|0|0|0|0|0	1	12.77	21.88	0	Yes
ARRDC5	ENDOD1	11|11	22	11	2	0|0|0|0|0|0|0|0|0	1	18.14	110	0	Yes
ARRDC5	SLC2A1	13|8	21	10.5	2	0|0|0|0|0|0|0|0|0	1	13.5	105	0	Yes
ARRDC5	ATP6V0A1	101|110	211	105.5	2	0|0|0|0|0|0|0|0|0	1	147.59	1055	0	Yes
ARRDC5	ATP6V0A2	54|60	114	57	2	0|0|0|0|0|0|0|0|0	1	80.74	570	0	Yes
ARRDC5	ATP6V1C1	13|14	27	13.5	2	0|0|0|0|0|0|0|0|0	1	21.18	135	0	Yes
ARRDC5	MYADM	15|23	38	19	2	0|0|0|0|0|0|0|0|0	1	24.18	190	0	Yes
ARRDC5	BTBD10	13|27	40	20	2	0|0|0|0|0|0|0|0|0	1	21.18	200	0	Yes
ARRDC5	KIDINS220	57|35	92	46	2	0|4|0|0|0|2|7|4|0	1	24.52	9.2	0	Yes
ARRDC5	ATP11C	9|9	18	9	2	0|0|0|0|0|0|0|0|0	1	15.06	90	0	Yes
ARRDC5	ATP11B	12|8	20	10	2	0|0|0|0|0|0|0|0|0	1	13.5	100	0	Yes
ARRDC5	USP11	16|12	28	14	2	0|0|0|0|0|0|3|0|0	0.99	4.52	14	0	Yes
ARRDC5	FLOT2	100|112	212	106	2	5|16|1|9|27|13|9|13|22	1	41.75	4.89	0	Yes
ARRDC5	TLDC1	8|11	19	9.5	2	0|0|0|0|0|0|0|0|0	1	13.5	95	0	Yes
ARRDC5	CNTN1	7|11	18	9	2	0|0|0|0|0|0|0|0|0	1	11.92	90	0	Yes
ARRDC5	PLPP1	6|6	12	6	2	0|0|0|0|0|0|0|0|0	1	10.31	60	0	Yes
ARRDC5	ATP6AP1	11|15	26	13	2	0|0|0|0|0|0|0|0|0	1	18.14	130	0	Yes
ARRDC5	STUB1	18|19	37	18.5	2	0|0|0|0|0|0|0|0|0	1	28.65	185	0	Yes
ARRDC5	KIAA2013	13|11	24	12	2	0|0|0|0|0|0|0|0|0	1	18.14	120	0	Yes
ARRDC5	STOML2	21|16	37	18.5	2	0|7|5|4|0|0|2|0|0	0.96	2.43	3.47	0.01	Yes
ARRDC5	KCTD20	15|12	27	13.5	2	0|0|0|0|0|0|0|0|0	1	19.66	135	0	Yes
ARRDC5	LMTK2	11|9	20	10	2	0|0|0|0|0|0|0|0|0	1	15.06	100	0	Yes
ARRDC5	ATP6V1F	8|7	15	7.5	2	0|0|0|0|0|0|0|0|0	1	11.92	75	0	Yes
ARRDC5	ATP6V1A	121|111	232	116	2	0|1|8|0|0|0|0|0|0	1	15.5	38.67	0	Yes
ARRDC5	ATP6V1H	22|15	37	18.5	2	0|0|5|0|0|0|0|0|0	0.98	3.56	11.1	0	Yes
ARRDC5	ERLIN1	23|27	50	25	2	0|0|0|0|0|0|0|0|0	1	36.01	250	0	Yes
ARRDC5	ERLIN2	70|98	168	84	2	0|0|0|0|0|0|0|0|0	1	103.57	840	0	Yes
ARRDC5	ATP6V1E1	16|34	50	25	2	0|0|0|0|0|0|0|0|0	1	25.68	250	0	Yes
ARRDC5	ATP6V0C	12|7	19	9.5	2	0|0|0|0|0|0|0|0|0	1	11.92	95	0	Yes
ARRDC5	HERC2	28|34	62	31	2	0|0|0|0|0|0|0|0|0	1	43.31	310	0	Yes
ARRDC5	SLC12A2	10|7	17	8.5	2	0|0|0|0|0|0|0|0|0	1	11.92	85	0	Yes
ARRDC5	CACNA2D1	15|14	29	14.5	2	0|0|0|0|0|0|0|0|0	1	22.68	145	0	Yes
ARRDC5	STOM	29|30	59	29.5	2	0|0|0|0|0|0|0|0|0	1	44.77	295	0	Yes
ARRDC5	HMGA1	7|8	15	7.5	2	0|0|0|0|4|0|0|0|0	0.88	1.81	5.62	0.01	Yes
ARRDC1	WWP1	60|97	157	78.5	2	0|0|0|0|0|0|0|0|0	1	89.31	785	0	Yes
ARRDC1	ZMYM2	16|12	28	14	2	0|0|0|0|0|0|0|0|0	1	19.66	140	0	Yes
ARRDC1	SLC2A11	23|29	52	26	2	0|0|0|0|0|0|0|0|0	1	36.01	260	0	Yes
ARRDC1	ITCH	44|51	95	47.5	2	0|0|0|0|0|0|0|0|0	1	66.41	475	0	Yes
ARRDC1	NEDD4	58|88	146	73	2	0|0|0|0|0|0|0|0|0	1	86.46	730	0	Yes
ARRDC1	LAMA1	20|17	37	18.5	2	0|0|0|0|0|0|0|0|0	1	27.17	185	0	Yes
ARRDC1	LAMA5	7|8	15	7.5	2	0|0|0|0|0|0|0|0|0	1	11.92	75	0	Yes
ARRDC1	NRP1	9|11	20	10	2	0|0|0|0|0|0|0|4|0	0.94	2.51	7.5	0.01	Yes
ARRDC1	TSG101	9|8	17	8.5	2	0|0|0|0|0|0|0|0|0	1	13.5	85	0	Yes
ARRDC1	LAMB2	12|6	18	9	2	0|0|0|0|0|0|0|0|0	1	10.31	90	0	Yes
ARRDC1	NID1	10|10	20	10	2	0|0|0|0|0|0|0|0|0	1	16.6	100	0	Yes
ARRDC1	KLHL12	30|53	83	41.5	2	0|0|0|0|0|0|0|0|0	1	46.22	415	0	Yes
ARRDC1	FGFRL1	9|6	15	7.5	2	0|0|0|0|0|0|0|0|0	1	10.31	75	0	Yes
ARRDC1	WWP2	44|74	118	59	2	0|0|0|0|0|0|0|0|0	1	66.41	590	0	Yes
ARRDC1	CUL9	14|7	21	10.5	2	0|0|0|0|0|0|0|0|0	1	11.92	105	0	Yes
ARRDC1	UTRN	31|21	52	26	2	9|0|0|2|9|0|1|2|2	0.85	0.87	3.9	0.01	Yes
ARRDC1	MYO5A	6|7	13	6.5	2	0|0|0|0|0|0|0|0|0	1	10.31	65	0	Yes
ARRDC1	SMURF1	8|15	23	11.5	2	0|0|0|0|0|0|0|0|0	1	13.5	115	0	Yes
ARRDC1	LAMC1	24|14	38	19	2	0|0|0|0|0|0|0|0|0	1	22.68	190	0	Yes
ARRDC1	TP53	6|13	19	9.5	2	0|0|0|0|0|0|0|0|0	1	10.31	95	0	Yes
ARRDC1	MYO1D	7|10	17	8.5	2	0|0|0|0|3|0|0|0|0	0.95	2.41	8.5	0.01	Yes
ARRDC1	POLR2A	11|10	21	10.5	2	0|0|0|0|0|0|0|0|0	1	16.6	105	0	Yes
ARRDC1	HECW2	24|22	46	23	2	0|0|0|0|0|0|0|0|0	1	34.55	230	0	Yes
ARRDC1	HADHB	19|20	39	19.5	2	0|2|7|3|0|0|0|0|0	1	5.95	4.88	0	Yes
ARRDC1	HADHA	41|46	87	43.5	2	0|7|19|8|0|3|3|0|0	0.95	2.36	3.84	0.01	Yes
ARRDC1	USP11	24|25	49	24.5	2	0|0|0|0|0|0|3|0|0	1	8.88	24.5	0	Yes
ARRDC1	NEDD4L	288|426	714	357	2	0|0|0|0|0|0|0|0|0	1	411.44	3570	0	Yes
ARRDC2	ZSWIM8	10|48	58	29	2	0|0|0|0|0|0|0|0|0	1	16.6	290	0	Yes
ARRDC2	PSMD13	9|9	18	9	2	0|3|4|0|0|0|0|0|0	0.87	1.91	3.86	0.01	Yes
ARRDC2	PRKAR1A	16|13	29	14.5	2	0|5|3|0|0|3|2|4|0	0.97	2.89	3.62	0.01	Yes
ARRDC2	PJA1	14|12	26	13	2	0|0|0|0|0|0|0|0|0	1	19.66	130	0	Yes
ARRDC2	PJA2	9|11	20	10	2	0|0|0|0|0|2|2|0|0	1	8.82	7.5	0	Yes
ARRDC2	BAG6	12|13	25	12.5	2	0|0|0|4|0|1|0|0|0	0.98	3.76	7.5	0.01	Yes
ARRDC2	UBR4	100|127	227	113.5	2	0|0|0|18|0|24|41|0|0	0.96	2.52	4.1	0.01	Yes
ARRDC2	POLR2A	12|12	24	12	2	0|0|0|0|0|0|0|0|0	1	19.66	120	0	Yes
ARRDC2	PSMB5	12|14	26	13	2	0|2|2|2|0|2|1|0|0	1	7.36	6.5	0	Yes
ARRDC2	LTN1	7|8	15	7.5	2	0|2|0|1|0|0|2|2|0	0.9	1.77	3.75	0.01	Yes
ARRDC2	ASH2L	6|9	15	7.5	2	0|0|0|0|0|0|0|0|0	1	10.31	75	0	Yes
ARRDC2	GEMIN4	9|18	27	13.5	2	0|0|0|3|0|4|1|0|0	0.95	2.14	5.06	0.01	Yes
ARRDC2	ITCH	14|31	45	22.5	2	0|0|0|0|0|0|0|0|0	1	22.68	225	0	Yes
ARRDC2	FARP2	7|10	17	8.5	2	0|0|0|0|0|0|0|0|0	1	11.92	85	0	Yes
ARRDC2	LLGL1	7|9	16	8	2	0|3|0|0|0|0|0|2|1	0.92	1.77	4	0.01	Yes
ARRDC2	DDX20	7|11	18	9	2	0|0|0|0|0|2|4|0|0	0.85	1.02	4.5	0.01	Yes
ARRDC2	WWP2	22|31	53	26.5	2	0|0|0|0|0|0|0|0|0	1	34.55	265	0	Yes
ARRDC2	WWP1	51|84	135	67.5	2	0|0|0|0|0|0|0|0|0	1	76.45	675	0	Yes
ARRDC2	MAP1B	21|22	43	21.5	2	2|0|0|4|2|0|0|0|0	1	15.84	8.06	0	Yes
ARRDC2	UBE3C	8|15	23	11.5	2	0|0|0|0|0|1|3|0|0	0.98	3.24	8.62	0.01	Yes
ARRDC2	SART3	52|52	104	52	2	0|2|2|3|0|4|18|4|0	0.99	4.68	6	0	Yes
ARRDC2	EPB41L3	32|13	45	22.5	2	2|3|2|4|4|0|0|0|0	0.99	3.87	6.14	0	Yes
ARRDC2	HCFC1	20|40	60	30	2	0|0|0|6|0|0|0|0|0	0.99	4.02	15	0	Yes
ARRDC2	NEDD4L	7|14	21	10.5	2	0|0|0|0|0|0|0|0|0	1	11.92	105	0	Yes
ARRDC2	TSC2	6|8	14	7	2	0|0|0|0|0|0|0|0|0	1	10.31	70	0	Yes
ARRDC2	RANBP9	7|11	18	9	2	0|0|0|0|0|4|2|0|0	0.85	1.02	4.5	0.01	Yes
ARRDC2	ZCCHC2	11|12	23	11.5	2	0|0|0|0|0|0|0|0|0	1	18.14	115	0	Yes
ARRDC2	PPP6R3	12|12	24	12	2	0|0|0|0|0|0|0|0|0	1	19.66	120	0	Yes
ARRDC2	SETD1A	9|8	17	8.5	2	0|0|0|0|0|0|0|0|0	1	13.5	85	0	Yes
ARRDC2	PEX1	7|12	19	9.5	2	0|0|0|1|0|2|3|0|0	0.93	1.77	4.75	0.01	Yes
ARRDC2	HECW2	30|46	76	38	2	0|0|0|0|0|0|0|0|0	1	46.22	380	0	Yes
ARRDC2	WDR6	25|38	63	31.5	2	0|2|0|2|2|5|7|5|1	1	11.73	5.56	0	Yes
ARRDC2	FLNC	9|10	19	9.5	2	0|0|0|0|0|0|0|0|0	1	15.06	95	0	Yes
ARRDC2	KCMF1	12|13	25	12.5	2	0|0|0|0|0|0|0|0|0	1	19.66	125	0	Yes
ARRDC2	TUBGCP2	18|21	39	19.5	2	3|2|0|2|2|6|6|5|0	0.99	3.82	3.44	0	Yes
ARRDC2	PSMD8	8|6	14	7	2	0|0|0|0|0|0|0|0|0	1	10.31	70	0	Yes
ARRDC2	PSMD4	9|9	18	9	2	0|0|0|4|0|0|0|0|0	0.92	2.51	6.75	0.01	Yes
ARRDC2	PSMD1	17|34	51	25.5	2	0|3|9|3|0|0|1|0|0	0.92	1.6	5.1	0.01	Yes
ARRDC2	PSMD3	22|22	44	22	2	0|10|9|3|0|3|4|3|2	0.87	1.88	2.87	0.01	Yes
ARRDC2	CPSF1	6|8	14	7	2	0|0|0|0|0|0|0|0|0	1	10.31	70	0	Yes
ARRDC2	HUWE1	24|47	71	35.5	2	0|0|0|0|0|0|0|0|0	1	37.48	355	0	Yes
ARRDC2	HDAC2	7|6	13	6.5	2	0|0|0|0|0|0|3|0|0	0.9	1.95	6.5	0.01	Yes
ARRDC2	SNRNP200	35|36	71	35.5	2	5|7|10|5|6|7|12|15|2	0.99	3.92	2.88	0	Yes
ARRDC2	SMU1	8|11	19	9.5	2	0|0|0|2|0|1|0|0|0	1	6.08	9.5	0	Yes
ARRDC2	BOD1L1	8|9	17	8.5	2	0|0|0|0|0|0|0|0|0	1	13.5	85	0	Yes
ARRDC2	USP9X	121|198	319	159.5	2	0|6|4|10|0|12|19|2|5	1	59.94	11.67	0	Yes
ARRDC2	TUBA1C	112|165	277	138.5	2	29|0|0|0|0|0|0|0|15	1	5.94	9.44	0	Yes
ARRDC3	NCBP1	12|10	22	11	2	0|0|0|0|0|0|0|0|0	1	16.6	110	0	Yes
ARRDC3	ZC3H14	25|26	51	25.5	2	7|0|0|0|1|0|0|0|0	0.99	4.57	9.56	0	Yes
ARRDC3	ZC3H18	7|7	14	7	2	0|0|0|0|0|0|0|0|0	1	11.92	70	0	Yes
ARRDC3	C2CD5	9|9	18	9	2	0|0|0|0|0|0|0|0|0	1	15.06	90	0	Yes
ARRDC3	SLC12A2	8|9	17	8.5	2	0|0|0|0|0|0|0|0|0	1	13.5	85	0	Yes
ARRDC3	SMAD5	9|8	17	8.5	2	1|0|0|0|2|0|0|0|0	1	6.08	8.5	0	Yes
ARRDC3	MIOS	8|6	14	7	2	0|0|0|0|0|0|0|0|0	1	10.31	70	0	Yes
ARRDC3	SNTB2	13|14	27	13.5	2	0|0|0|0|2|0|0|0|0	1	7.76	20.25	0	Yes
ARRDC3	RAB11FIP5	7|10	17	8.5	2	0|0|0|0|0|0|0|0|0	1	11.92	85	0	Yes
ARRDC3	BCR	7|10	17	8.5	2	0|0|0|0|0|0|0|0|0	1	11.92	85	0	Yes
ARRDC3	SLIT2	12|11	23	11.5	2	0|0|0|0|2|0|0|0|0	1	6.51	17.25	0	Yes
ARRDC3	FIP1L1	8|9	17	8.5	2	0|0|0|0|0|0|0|0|0	1	13.5	85	0	Yes
ARRDC3	NOLC1	11|9	20	10	2	0|0|0|0|0|0|0|0|0	1	15.06	100	0	Yes
ARRDC3	SNW1	13|19	32	16	2	1|1|0|4|2|0|0|3|0	1	5.74	5.33	0	Yes
ARRDC3	WDR75	10|8	18	9	2	0|0|0|0|0|0|0|0|0	1	13.5	90	0	Yes
ARRDC3	ZCCHC8	19|22	41	20.5	2	0|0|0|0|0|0|0|0|0	1	30.13	205	0	Yes
ARRDC3	ZCCHC2	11|13	24	12	2	0|0|0|0|0|0|0|0|0	1	18.14	120	0	Yes
ARRDC3	TRIM3	10|6	16	8	2	0|0|0|0|0|0|0|0|0	1	10.31	80	0	Yes
ARRDC3	TRIM5	14|7	21	10.5	2	0|0|0|0|0|0|0|0|0	1	11.92	105	0	Yes
ARRDC3	TRIM4	16|14	30	15	2	2|3|0|0|1|0|0|3|1	1	7.67	5.62	0	Yes
ARRDC3	CFAP20	7|6	13	6.5	2	0|0|0|0|0|0|0|0|0	1	10.31	65	0	Yes
ARRDC3	PRPF40A	9|6	15	7.5	2	0|1|0|0|0|0|0|3|0	0.92	1.79	5.62	0.01	Yes
ARRDC3	CUL7	11|12	23	11.5	2	0|0|0|0|0|2|6|0|0	0.87	1.74	4.31	0.01	Yes
ARRDC3	TRIM25	9|9	18	9	2	0|1|3|0|0|0|0|0|0	0.98	3.96	6.75	0.01	Yes
ARRDC3	TRIM26	8|11	19	9.5	2	3|0|0|0|1|0|0|0|0	0.98	3.24	7.12	0.01	Yes
ARRDC3	PTPN13	19|19	38	19	2	0|0|0|0|0|2|3|0|0	1	14.03	11.4	0	Yes
ARRDC3	UTRN	32|30	62	31	2	9|0|0|2|9|0|1|2|2	1	5.96	4.65	0	Yes
ARRDC3	SRSF7	6|7	13	6.5	2	0|0|0|0|0|0|0|0|0	1	10.31	65	0	Yes
ARRDC3	SRSF1	16|13	29	14.5	2	0|1|4|0|0|0|0|0|0	0.99	4.2	8.7	0	Yes
ARRDC3	BAG6	11|8	19	9.5	2	0|0|0|4|0|1|0|0|0	0.92	1.97	5.7	0.01	Yes
ARRDC3	MYO1E	10|12	22	11	2	0|0|4|0|0|0|0|0|0	0.96	2.84	8.25	0.01	Yes
ARRDC3	DSG2	24|27	51	25.5	2	0|0|0|0|0|0|0|0|0	1	37.48	255	0	Yes
ARRDC3	SAP18	18|20	38	19	2	0|0|0|0|0|0|0|0|0	1	28.65	190	0	Yes
ARRDC3	POLR2A	15|17	32	16	2	0|0|0|0|0|0|0|0|0	1	24.18	160	0	Yes
ARRDC3	PAXBP1	6|15	21	10.5	2	0|0|0|0|0|0|0|0|0	1	10.31	105	0	Yes
ARRDC3	CAMK2D	9|10	19	9.5	2	0|0|0|0|0|0|0|0|0	1	15.06	95	0	Yes
ARRDC3	CAMK2G	13|9	22	11	2	0|0|0|0|0|0|0|0|0	1	15.06	110	0	Yes
ARRDC3	DEPDC1B	6|7	13	6.5	2	0|0|0|0|0|0|0|0|0	1	10.31	65	0	Yes
ARRDC3	CWC27	13|13	26	13	2	0|0|0|0|0|0|0|0|0	1	21.18	130	0	Yes
ARRDC3	ZIC2	7|6	13	6.5	2	0|0|0|0|0|0|0|0|0	1	10.31	65	0	Yes
ARRDC3	TTC37	8|12	20	10	2	0|0|0|0|0|0|0|0|0	1	13.5	100	0	Yes
ARRDC3	FAM91A1	8|12	20	10	2	0|0|0|0|0|0|0|0|0	1	13.5	100	0	Yes
ARRDC3	ZNF638	6|7	13	6.5	2	0|0|0|0|0|0|0|0|0	1	10.31	65	0	Yes
ARRDC3	WDR82	7|11	18	9	2	0|0|0|0|0|0|0|0|0	1	11.92	90	0	Yes
ARRDC3	ITCH	14|6	20	10	2	0|0|0|0|0|0|0|0|0	1	10.31	100	0	Yes
ARRDC3	LPIN1	7|11	18	9	2	0|0|0|0|0|0|0|0|0	1	11.92	90	0	Yes
ARRDC3	DYRK1A	21|17	38	19	2	0|1|0|0|2|1|6|5|5	0.99	3.63	3.56	0	Yes
ARRDC3	FARP2	9|8	17	8.5	2	0|0|0|0|0|0|0|0|0	1	13.5	85	0	Yes
ARRDC3	U2SURP	38|36	74	37	2	0|0|0|0|0|0|0|0|0	1	54.9	370	0	Yes
ARRDC3	LLGL1	17|11	28	14	2	0|3|0|0|0|0|0|2|1	1	6.21	7	0	Yes
ARRDC3	TFIP11	6|6	12	6	2	0|0|0|1|0|1|1|0|0	0.97	3.54	6	0.01	Yes
ARRDC3	CDK5	6|7	13	6.5	2	0|0|0|0|0|0|0|2|3	0.85	1.35	3.9	0.01	Yes
ARRDC3	CDK9	11|15	26	13	2	0|0|0|3|0|0|3|0|0	1	4.76	6.5	0	Yes
ARRDC3	NFKBIL1	7|15	22	11	2	0|0|0|0|0|0|0|0|0	1	11.92	110	0	Yes
ARRDC3	COPA	101|108	209	104.5	2	11|5|10|11|10|15|16|12|12	1	71.32	7.29	0	Yes
ARRDC3	COPE	17|16	33	16.5	2	0|0|0|0|0|2|5|0|0	0.99	4.39	7.07	0	Yes
ARRDC3	PNN	8|12	20	10	2	0|0|0|0|0|0|0|0|0	1	13.5	100	0	Yes
ARRDC3	DDX28	9|12	21	10.5	2	2|0|0|0|0|0|0|0|0	1	5.21	15.75	0	Yes
ARRDC3	SCRIB	8|9	17	8.5	2	0|0|0|0|0|0|0|0|0	1	13.5	85	0	Yes
ARRDC3	WWP1	8|6	14	7	2	0|0|0|0|0|0|0|0|0	1	10.31	70	0	Yes
ARRDC3	GPATCH8	30|37	67	33.5	2	0|0|0|0|0|0|0|0|0	1	46.22	335	0	Yes
ARRDC3	GPATCH1	14|13	27	13.5	2	0|0|0|0|0|0|0|0|0	1	21.18	135	0	Yes
ARRDC3	INPP5F	9|8	17	8.5	2	0|0|0|0|0|0|3|0|0	0.96	2.86	8.5	0.01	Yes
ARRDC3	SPEN	6|9	15	7.5	2	0|0|0|0|0|0|0|0|0	1	10.31	75	0	Yes
ARRDC3	MAP1B	15|13	28	14	2	2|0|0|4|2|0|0|0|0	1	6.59	5.25	0	Yes
ARRDC3	ARHGEF2	15|17	32	16	2	2|0|0|0|2|0|0|0|4	1	8.78	6	0	Yes
ARRDC3	EPB41L3	51|56	107	53.5	2	2|3|2|4|4|0|0|0|0	1	49.96	14.59	0	Yes
ARRDC3	THRAP3	67|71	138	69	2	0|0|0|0|0|0|0|1|5	1	17.71	34.5	0	Yes
ARRDC3	BIRC2	20|18	38	19	2	5|0|0|0|1|2|2|0|0	1	11.18	6.33	0	Yes
ARRDC3	BCLAF1	150|164	314	157	2	1|0|0|0|1|0|0|0|4	1	128.19	78.5	0	Yes
ARRDC3	MCM7	12|14	26	13	2	0|1|1|0|0|1|5|2|0	0.99	3.86	4.88	0	Yes
ARRDC3	MCM5	10|12	22	11	2	0|0|0|3|0|1|2|0|0	1	5.09	5.5	0	Yes
ARRDC3	MCM3	17|17	34	17	2	3|5|1|8|0|3|2|1|0	0.98	3.92	3.19	0.01	Yes
ARRDC3	UBE3C	24|27	51	25.5	2	0|0|0|0|0|1|3|0|0	1	14.61	19.12	0	Yes
ARRDC3	IPO9	6|6	12	6	2	0|0|0|0|0|0|0|0|0	1	10.31	60	0	Yes
ARRDC3	SDCBP	34|18	52	26	2	0|4|2|0|0|0|0|2|0	1	12.24	9.75	0	Yes
ARRDC3	POLDIP2	25|24	49	24.5	2	5|4|0|3|4|3|3|2|4	1	14.06	5.65	0	Yes
ARRDC3	VPS39	24|28	52	26	2	5|0|0|0|3|0|0|0|0	1	7.99	9.75	0	Yes
ARRDC3	NUMA1	18|15	33	16.5	2	0|0|0|0|0|0|0|0|0	1	24.18	165	0	Yes
ARRDC3	NEDD4L	28|28	56	28	2	0|0|0|0|0|0|0|0|0	1	43.31	280	0	Yes
ARRDC3	SQRDL	12|9	21	10.5	2	5|0|0|0|2|0|0|0|0	0.88	1.45	4.5	0.01	Yes
ARRDC3	LARP1	6|7	13	6.5	2	0|0|0|0|0|0|0|0|0	1	10.31	65	0	Yes
ARRDC3	CEP78	8|7	15	7.5	2	0|0|0|0|0|0|0|0|0	1	11.92	75	0	Yes
ARRDC3	NF1	8|8	16	8	2	0|0|0|0|0|0|0|0|0	1	13.5	80	0	Yes
ARRDC3	HTRA2	21|23	44	22	2	0|0|0|3|0|3|1|0|0	1	17.12	9.43	0	Yes
ARRDC3	SMC2	12|14	26	13	2	2|2|2|4|0|0|2|0|0	1	5.53	4.88	0	Yes
ARRDC3	NEDD4	8|6	14	7	2	0|0|0|0|0|0|0|0|0	1	10.31	70	0	Yes
ARRDC3	ESYT2	13|18	31	15.5	2	5|2|1|0|2|2|1|4|0	0.99	3.87	4.23	0	Yes
ARRDC3	ADAMTS1	9|6	15	7.5	2	0|0|0|0|0|0|0|0|0	1	10.31	75	0	Yes
ARRDC3	PDXDC1	16|8	24	12	2	2|0|0|0|0|0|0|0|0	0.99	4.55	18	0	Yes
ARRDC3	DHX30	12|10	22	11	2	0|0|0|0|0|1|4|0|0	0.96	2.88	6.6	0.01	Yes
ARRDC3	RUVBL1	48|48	96	48	2	7|10|11|12|10|16|21|5|9	1	7.21	2.94	0	Yes
ARRDC3	RUVBL2	63|59	122	61	2	8|10|4|14|6|10|19|5|7	1	20.81	4.26	0	Yes
ARRDC3	DDX52	23|15	38	19	2	0|0|0|0|0|0|0|0|0	1	24.18	190	0	Yes
ARRDC3	DDX50	7|7	14	7	2	0|0|0|0|0|0|0|0|0	1	11.92	70	0	Yes
ARRDC3	U2AF2	20|22	42	21	2	2|0|0|0|2|0|0|0|0	1	35.19	15.75	0	Yes
ARRDC3	SF3A3	10|11	21	10.5	2	0|0|0|0|0|0|0|0|0	1	16.6	105	0	Yes
ARRDC3	RNPS1	11|13	24	12	2	0|0|0|0|0|0|0|0|0	1	18.14	120	0	Yes
ARRDC3	GCN1	57|54	111	55.5	2	7|10|11|15|5|9|20|11|0	1	15.42	3.62	0	Yes
ARRDC3	NUDT19	9|10	19	9.5	2	0|3|1|0|0|0|0|0|0	0.99	3.96	7.12	0	Yes
ARRDC3	IQGAP2	9|7	16	8	2	0|0|0|0|0|0|0|0|0	1	11.92	80	0	Yes
ARRDC3	VPS11	8|8	16	8	2	0|0|0|0|0|0|0|0|0	1	13.5	80	0	Yes
ARRDC3	CCNT1	9|9	18	9	2	0|0|0|0|0|0|0|0|0	1	15.06	90	0	Yes
ARRDC3	FMNL2	8|7	15	7.5	2	0|0|0|0|0|0|0|0|0	1	11.92	75	0	Yes
ARRDC3	FMNL3	14|12	26	13	2	2|0|0|0|0|0|0|0|0	1	7.14	19.5	0	Yes
ARRDC3	CHERP	19|18	37	18.5	2	0|0|0|0|0|0|0|0|0	1	28.65	185	0	Yes
ARRDC3	RBBP6	17|21	38	19	2	0|0|0|0|0|0|0|0|0	1	27.17	190	0	Yes
ARRDC3	DOCK7	20|16	36	18	2	0|0|0|0|0|0|0|0|0	1	25.68	180	0	Yes
ARRDC3	CTNND1	28|22	50	25	2	0|3|9|0|0|0|5|0|1	1	5.54	4.41	0	Yes
ARRDC3	WDR34	7|9	16	8	2	0|0|0|0|0|0|0|0|0	1	11.92	80	0	Yes
ARRDC3	WDR36	6|8	14	7	2	0|0|0|0|0|0|0|0|0	1	10.31	70	0	Yes
ARRDC3	GTPBP2	9|8	17	8.5	2	0|0|0|0|0|0|0|0|0	1	13.5	85	0	Yes
ARRDC3	EIF4A3	25|24	49	24.5	2	0|7|3|0|0|0|0|0|0	0.99	4.85	7.35	0	Yes
ARRDC3	MAGED2	10|11	21	10.5	2	0|3|0|3|2|3|3|4|2	0.86	1.31	3.15	0.01	Yes
ARRDC3	DTNA	9|11	20	10	2	0|0|0|0|0|0|0|0|0	1	15.06	100	0	Yes
ARRDC3	AMOT	7|8	15	7.5	2	0|0|0|0|4|0|0|0|0	0.88	1.81	5.62	0.01	Yes
ARRDC3	CLPX	16|20	36	18	2	4|0|2|2|3|2|3|0|2	1	8.09	5.4	0	Yes
ARRDC3	PTPRF	10|10	20	10	2	0|0|0|0|0|0|0|0|0	1	16.6	100	0	Yes
ARRDC3	MFAP1	9|8	17	8.5	2	0|0|0|0|0|0|0|0|0	1	13.5	85	0	Yes
ARRDC3	SGPL1	11|7	18	9	2	1|0|0|2|1|0|1|0|0	0.99	3.67	6.75	0	Yes
ARRDC3	WDR6	22|22	44	22	2	0|2|0|2|2|5|7|5|1	1	8.44	3.88	0	Yes
ARRDC3	PDLIM5	11|10	21	10.5	2	1|0|5|0|2|0|0|0|0	0.93	2.29	3.94	0.01	Yes
ARRDC3	MCCC2	9|8	17	8.5	2	0|0|0|0|0|0|0|0|0	1	13.5	85	0	Yes
ARRDC3	WDR33	21|17	38	19	2	0|0|0|0|0|0|0|0|0	1	27.17	190	0	Yes
ARRDC3	SART1	10|12	22	11	2	0|0|0|0|0|0|0|0|0	1	16.6	110	0	Yes
ARRDC3	RBM17	20|13	33	16.5	2	0|0|0|0|0|0|0|0|0	1	21.18	165	0	Yes
ARRDC3	RBM15	12|12	24	12	2	0|0|0|0|0|0|0|0|0	1	19.66	120	0	Yes
ARRDC3	CPSF3	17|17	34	17	2	0|0|0|0|0|0|4|0|0	0.99	4.9	12.75	0	Yes
ARRDC3	CPSF2	10|10	20	10	2	0|0|0|0|0|0|0|0|0	1	16.6	100	0	Yes
ARRDC3	CPSF1	36|31	67	33.5	2	0|0|0|0|0|0|0|0|0	1	47.67	335	0	Yes
ARRDC3	ABR	11|10	21	10.5	2	1|3|0|1|2|0|3|2|1	0.98	3.31	3.94	0.01	Yes
ARRDC3	PARD3	10|10	20	10	2	0|0|0|0|0|0|0|0|0	1	16.6	100	0	Yes
ARRDC3	SLC25A17	7|9	16	8	2	0|0|0|0|0|1|3|0|0	0.95	2.51	6	0.01	Yes
ARRDC3	MLLT11	9|6	15	7.5	2	0|0|0|0|0|0|4|0|0	0.87	1.43	5.62	0.01	Yes
ARRDC3	PI4KA	9|7	16	8	2	0|0|0|0|0|0|0|0|0	1	11.92	80	0	Yes
ARRDC3	DMD	16|14	30	15	2	3|0|0|0|4|0|0|3|1	1	5.94	4.5	0	Yes
ARRDC3	IARS2	10|8	18	9	2	2|0|0|2|2|1|0|0|0	0.97	2.93	4.5	0.01	Yes
ARRDC3	EPB41L4B	9|9	18	9	2	0|0|0|0|0|0|0|0|0	1	15.06	90	0	Yes
ARRDC3	ENSG00000276612	13|8	21	10.5	2	0|0|0|0|0|0|0|0|0	1	13.5	105	0	Yes
ARRDC3	SNRNP200	44|35	79	39.5	2	5|7|10|5|6|7|12|15|2	0.99	3.92	3.2	0	Yes
ARRDC3	COPB2	71|59	130	65	2	5|6|8|6|5|12|12|5|5	1	35.02	6.09	0	Yes
ARRDC3	SMU1	15|19	34	17	2	0|0|0|2|0|1|0|0|0	1	15.53	17	0	Yes
ARRDC3	TNIK	6|6	12	6	2	0|0|0|0|0|0|0|0|0	1	10.31	60	0	Yes
ARRDC3	DNAJC10	9|15	24	12	2	0|0|0|0|0|0|0|0|0	1	15.06	120	0	Yes
ARRDC3	TBC1D9B	10|11	21	10.5	2	0|0|0|0|0|0|0|0|0	1	16.6	105	0	Yes
ARRDC3	WDR11	10|9	19	9.5	2	0|0|0|0|0|0|0|0|0	1	15.06	95	0	Yes
ARRDC3	MAP4K4	7|6	13	6.5	2	0|0|0|0|0|0|0|0|0	1	10.31	65	0	Yes
ARRDC3	IK	6|7	13	6.5	2	0|0|0|0|0|0|0|0|0	1	10.31	65	0	Yes
ARRDC3	PBXIP1	14|17	31	15.5	2	0|0|0|0|0|0|0|4|0	0.99	4.06	11.62	0	Yes
ARRDC3	RBM15B	9|13	22	11	2	0|0|0|0|0|0|0|0|0	1	15.06	110	0	Yes
ARRDC3	CSNK2A2	8|7	15	7.5	2	0|0|0|0|0|0|0|0|0	1	11.92	75	0	Yes
ARRDC3	CSNK2A1	21|25	46	23	2	0|2|2|0|0|0|0|0|0	1	37.95	17.25	0	Yes
ARRDC3	POLD1	17|16	33	16.5	2	3|0|0|5|0|4|5|0|0	0.99	4.44	3.54	0	Yes
ARRDC3	AAR2	11|6	17	8.5	2	0|0|0|0|0|0|0|0|0	1	10.31	85	0	Yes
ARRDC3	SERPINH1	19|18	37	18.5	2	5|4|6|5|3|2|4|4|2	0.99	4.81	3.47	0	Yes
TXNIP	ZSWIM8	16|13	29	14.5	2	0|0|0|0|0|0|0|0|0	1	21.18	145	0	Yes
TXNIP	GTF3C3	7|9	16	8	2	0|0|0|0|0|0|0|0|0	1	11.92	80	0	Yes
TXNIP	GTF3C1	6|11	17	8.5	2	0|0|0|0|0|0|0|0|0	1	10.31	85	0	Yes
TXNIP	NPHP3	8|16	24	12	2	0|0|0|0|0|0|0|0|0	1	13.5	120	0	Yes
TXNIP	CHAF1B	6|7	13	6.5	2	0|0|0|0|2|0|0|0|0	0.97	3.18	9.75	0.01	Yes
TXNIP	ECD	6|11	17	8.5	2	0|0|0|0|0|0|0|0|0	1	10.31	85	0	Yes
TXNIP	PJA2	8|17	25	12.5	2	0|0|0|0|0|2|2|0|0	1	6.91	9.38	0	Yes
TXNIP	BAG6	37|54	91	45.5	2	0|0|0|4|0|1|0|0|0	1	13.84	27.3	0	Yes
TXNIP	KIF16B	11|28	39	19.5	2	1|0|0|0|3|0|0|0|0	1	5.4	14.62	0	Yes
TXNIP	POLR2A	13|27	40	20	2	0|0|0|0|0|0|0|0|0	1	21.18	200	0	Yes
TXNIP	NEURL4	32|29	61	30.5	2	0|0|0|0|0|0|0|0|0	1	44.77	305	0	Yes
TXNIP	PSMB5	7|15	22	11	2	0|2|2|2|0|2|1|0|0	0.93	1.77	5.5	0.01	Yes
TXNIP	ITCH	11|8	19	9.5	2	0|0|0|0|0|0|0|0|0	1	13.5	95	0	Yes
TXNIP	PMPCB	11|11	22	11	2	0|0|0|2|0|0|6|0|0	0.85	1.74	4.12	0.01	Yes
TXNIP	PMPCA	8|10	18	9	2	0|0|0|0|0|0|5|0|0	0.88	1.72	5.4	0.01	Yes
TXNIP	RLIM	6|10	16	8	2	0|0|0|0|0|0|0|0|0	1	10.31	80	0	Yes
TXNIP	SCRIB	22|19	41	20.5	2	0|0|0|0|0|0|0|0|0	1	30.13	205	0	Yes
TXNIP	WWP2	25|19	44	22	2	0|0|0|0|0|0|0|0|0	1	30.13	220	0	Yes
TXNIP	WWP1	30|23	53	26.5	2	0|0|0|0|0|0|0|0|0	1	36.01	265	0	Yes
TXNIP	MAP1B	13|26	39	19.5	2	2|0|0|4|2|0|0|0|0	1	6.59	7.31	0	Yes
TXNIP	EPB41L3	15|13	28	14	2	2|3|2|4|4|0|0|0|0	0.99	3.87	3.82	0	Yes
TXNIP	UBE3C	7|9	16	8	2	0|0|0|0|0|1|3|0|0	0.95	2.51	6	0.01	Yes
TXNIP	CWF19L1	6|7	13	6.5	2	0|0|0|0|0|0|0|0|0	1	10.31	65	0	Yes
TXNIP	NEDD4L	33|38	71	35.5	2	0|0|0|0|0|0|0|0|0	1	50.56	355	0	Yes
TXNIP	VPRBP	11|18	29	14.5	2	0|0|0|0|0|0|0|0|0	1	18.14	145	0	Yes
TXNIP	CAD	65|115	180	90	2	7|6|3|8|8|12|27|11|4	0.99	3.95	5.4	0	Yes
TXNIP	WDHD1	11|31	42	21	2	0|0|0|0|0|0|0|0|0	1	18.14	210	0	Yes
TXNIP	RBBP7	34|54	88	44	2	0|11|6|2|0|1|2|3|0	1	7.54	6.6	0	Yes
TXNIP	DOCK7	6|6	12	6	2	0|0|0|0|0|0|0|0|0	1	10.31	60	0	Yes
TXNIP	PAPD7	7|10	17	8.5	2	0|0|0|0|0|0|0|0|0	1	11.92	85	0	Yes
TXNIP	ZCCHC2	11|15	26	13	2	0|0|0|0|0|0|0|0|0	1	18.14	130	0	Yes
TXNIP	MAGED4	6|7	13	6.5	2	0|0|0|0|0|0|3|0|0	0.9	1.95	6.5	0.01	Yes
TXNIP	SSSCA1	19|14	33	16.5	2	0|0|0|0|0|0|0|0|0	1	22.68	165	0	Yes
TXNIP	GET4	6|9	15	7.5	2	0|0|0|0|0|0|0|0|0	1	10.31	75	0	Yes
TXNIP	PSMD4	8|11	19	9.5	2	0|0|0|4|0|0|0|0|0	0.93	2.17	7.12	0.01	Yes
TXNIP	PSMD1	20|35	55	27.5	2	0|3|9|3|0|0|1|0|0	0.98	3.42	5.5	0	Yes
TXNIP	HUWE1	23|46	69	34.5	2	0|0|0|0|0|0|0|0|0	1	36.01	345	0	Yes
TXNIP	HDAC2	7|15	22	11	2	0|0|0|0|0|0|3|0|0	0.96	2.41	11	0.01	Yes
TXNIP	PI4KA	8|9	17	8.5	2	0|0|0|0|0|0|0|0|0	1	13.5	85	0	Yes
TXNIP	USP5	15|29	44	22	2	0|2|7|0|0|0|0|0|0	0.96	2.49	7.33	0.01	Yes
TXNIP	PJA1	13|11	24	12	2	0|0|0|0|0|0|0|0|0	1	18.14	120	0	Yes
TXNIP	HERC2	120|102	222	111	2	0|0|0|0|0|0|0|0|0	1	149.01	1110	0	Yes
TXNIP	WDR11	6|8	14	7	2	0|0|0|0|0|0|0|0|0	1	10.31	70	0	Yes
TXNIP	MTR	11|16	27	13.5	2	0|0|0|0|0|0|0|0|0	1	18.14	135	0	Yes
TXNIP	PKN3	11|10	21	10.5	2	5|0|0|0|3|0|0|0|0	0.86	1.58	3.94	0.01	Yes
TXNIP	KDM5C	16|23	39	19.5	2	0|0|0|0|0|0|0|0|0	1	25.68	195	0	Yes
TXNIP	BAT3	9|14	23	11.5	2	0|0|0|0|0|0|0|0|0	1	15.06	115	0	Yes
ARRDC4	HSPA2	57|57	114	57	2	0|24|24|26|0|23|31|25|0	0	-16.57	2.09	0.63
ARRDC4	HIST1H4A	6|14	20	10	2	4|2|23|5|8|2|5|1|2	0	-34.77	0.83	0.65
ARRDC4	AGK	4|5	9	4.5	2	4|5|5|2|4|2|6|8|3	0	-17.47	0.71	0.63
ARRDC4	HSPA6	44|0	44	22	2	0|0|0|0|0|0|0|0|0	0.5	-1.13	220	0.07
ARRDC4	HSPA5	54|49	103	51.5	2	14|35|67|33|20|32|43|25|19	0	-99.19	1.07	0.68
ARRDC4	HSPA4	0|5	5	2.5	2	0|9|14|11|0|0|0|0|0	0	-49.54	0.22	0.67
ARRDC4	HSPA9	67|70	137	68.5	2	16|35|33|25|17|24|38|27|17	0	-30.03	1.94	0.66
ARRDC4	HSPA8	171|164	335	167.5	2	39|73|74|72|36|76|95|61|52	0	-63.53	2.05	0.68
ARRDC4	SSFA2	4|2	6	3	2	0|0|0|0|2|0|0|0|0	0.68	0.04	4.5	0.03
ARRDC4	CS	1|2	3	1.5	2	0|3|5|3|0|0|0|0|0	0	-12.93	0.41	0.59
ARRDC4	LIFR	3|2	5	2.5	2	0|0|0|0|0|0|0|0|0	0.98	3.41	25	0
ARRDC4	MZT2B	0|2	2	1	2	0|0|0|0|0|0|0|0|0	0.48	-1.13	10	0.18
ARRDC4	ZNF703	2|1	3	1.5	2	0|0|0|0|0|0|0|0|0	0.48	1.38	15	0.18
ARRDC4	ZC3H14	5|1	6	3	2	7|0|0|0|1|0|0|0|0	0.04	-8.37	1.12	0.4
ARRDC4	TMEM59	3|2	5	2.5	2	0|0|0|0|0|0|0|0|0	0.98	3.41	25	0
ARRDC4	TMEM57	0|2	2	1	2	0|0|0|0|0|0|0|0|0	0.48	-1.13	10	0.18
ARRDC4	ABCD3	0|2	2	1	2	0|5|4|0|0|0|4|1|0	0	-18.53	0.23	0.61
ARRDC4	ZSWIM8	0|2	2	1	2	0|0|0|0|0|0|0|0|0	0.48	-1.13	10	0.18
ARRDC4	DHX9	10|9	19	9.5	2	3|9|11|5|5|3|11|3|3	0	-24.08	0.92	0.65
ARRDC4	TCOF1	3|5	8	4	2	6|0|1|8|6|7|9|3|8	0	-27.4	0.48	0.69
ARRDC4	SP2	0|2	2	1	2	1|0|0|0|2|2|2|1|3	0	-9.85	0.43	0.51
ARRDC4	NUP93	9|6	15	7.5	2	4|9|2|11|2|13|12|13|3	0	-38.36	0.59	0.67
ARRDC4	SPPL3	2|0	2	1	2	0|0|0|0|0|0|0|0|0	0.48	-1.13	10	0.18
ARRDC4	PTRH2	3|3	6	3	2	0|0|0|0|0|0|0|0|0	0.99	5.25	30	0
ARRDC4	MYL12A	3|1	4	2	2	1|3|5|0|1|0|0|1|1	0	-10.13	0.67	0.52
ARRDC4	TRAPPC5	2|3	5	2.5	2	0|0|0|0|0|0|0|0|0	0.98	3.41	25	0
ARRDC4	ACLY	1|4	5	2.5	2	0|10|12|11|0|0|2|0|0	0	-44.24	0.23	0.67
ARRDC4	UGCG	4|2	6	3	2	0|0|0|0|0|0|0|0|0	0.98	3.41	30	0
ARRDC4	ATP2A2	34|29	63	31.5	2	13|13|19|10|10|12|20|24|3	0	-32.85	1.5	0.66
ARRDC4	ALDH3A2	6|5	11	5.5	2	3|5|7|5|2|3|5|3|4	0	-13.42	0.97	0.6
ARRDC4	GTF3C3	3|0	3	1.5	2	0|0|0|0|0|0|0|0|0	0.5	-1.13	15	0.12
ARRDC4	MGST3	2|1	3	1.5	2	0|0|0|0|0|0|0|0|0	0.48	1.38	15	0.18
ARRDC4	GTF3C5	2|1	3	1.5	2	0|0|0|0|0|0|0|0|0	0.48	1.38	15	0.18
ARRDC4	GTF3C4	2|0	2	1	2	0|0|0|0|0|0|0|0|0	0.48	-1.13	10	0.18
ARRDC4	GPRASP2	2|1	3	1.5	2	0|0|0|0|0|0|0|0|0	0.48	1.38	15	0.18
ARRDC4	XPO1	17|19	36	18	2	4|14|10|6|4|8|18|11|0	0	-26.58	1.26	0.65
ARRDC4	XPO5	5|6	11	5.5	2	0|4|4|0|0|1|2|2|0	0.01	-5.21	1.65	0.44
ARRDC4	DGAT1	2|3	5	2.5	2	2|0|0|0|0|0|0|0|0	0.61	0.04	3.75	0.04
ARRDC4	TTK	5|5	10	5	2	1|0|0|0|2|0|0|0|0	0.91	2.33	5	0.01
ARRDC4	LSR	12|4	16	8	2	0|0|0|0|0|0|0|0|0	1	6.99	80	0
ARRDC4	TMEM263	3|2	5	2.5	2	2|0|0|0|0|1|2|0|0	0.06	-3.65	1.5	0.38
ARRDC4	GAR1	1|1	2	1	2	0|0|0|0|0|0|0|0|0	0	1.38	10	0.69
ARRDC4	ANAPC1	3|2	5	2.5	2	0|0|0|0|0|0|0|0|0	0.98	3.41	25	0
ARRDC4	PISD	3|2	5	2.5	2	2|0|0|0|2|0|4|0|0	0	-7.22	0.94	0.5
ARRDC4	PSMD14	3|4	7	3.5	2	0|2|2|1|0|2|0|0|0	0.08	-3.39	1.75	0.37
ARRDC4	PSMD11	9|9	18	9	2	0|4|5|0|0|0|0|0|0	0.54	0.18	3	0.05
ARRDC4	PSMD12	5|8	13	6.5	2	0|2|2|0|0|0|0|0|0	0.93	1.9	4.88	0.01
ARRDC4	NUP133	12|11	23	11.5	2	3|5|0|4|3|7|14|8|2	0	-18.72	1.19	0.63
ARRDC4	SMAD5	2|0	2	1	2	1|0|0|0|2|0|0|0|0	0.11	-4.17	1	0.36
ARRDC4	SMAD1	2|0	2	1	2	0|0|0|0|0|0|0|0|0	0.48	-1.13	10	0.18
ARRDC4	SMAD3	1|2	3	1.5	2	0|0|0|0|0|0|0|0|0	0.48	1.38	15	0.18
ARRDC4	NPHP3	6|4	10	5	2	0|0|0|0|0|0|0|0|0	1	6.99	50	0
ARRDC4	NDUFAF4	5|3	8	4	2	0|7|2|1|0|3|8|5|2	0	-20.69	0.6	0.63
ARRDC4	NDUFAF3	5|7	12	6	2	6|4|2|4|1|6|3|6|0	0	-14.57	1	0.6
ARRDC4	ZWILCH	3|0	3	1.5	2	0|0|0|0|0|0|0|0|0	0.5	-1.13	15	0.12
ARRDC4	SNTB2	1|2	3	1.5	2	0|0|0|0|2|0|0|0|0	0.26	-1.26	2.25	0.32
ARRDC4	IGF2R	3|1	4	2	2	0|0|0|0|0|0|0|0|0	0.5	1.38	20	0.12
ARRDC4	ARF5	1|1	2	1	2	0|0|4|0|0|0|0|0|0	0	-3.51	0.75	0.69
ARRDC4	ARF4	2|0	2	1	2	0|0|4|3|0|2|0|0|0	0	-12.67	0.33	0.55
ARRDC4	PRKAR1A	9|8	17	8.5	2	0|5|3|0|0|3|2|4|0	0.07	-3.4	2.12	0.37
ARRDC4	ZC3H18	6|3	9	4.5	2	0|0|0|0|0|0|0|0|0	1	5.25	45	0
ARRDC4	SAR1B	1|1	2	1	2	0|0|0|0|0|0|0|0|0	0	1.38	10	0.69
ARRDC4	CORO1C	2|0	2	1	2	0|2|4|5|0|0|0|0|0	0	-15.64	0.27	0.59
ARRDC4	CLPTM1	2|0	2	1	2	0|1|2|0|0|0|0|1|0	0.04	-5.65	0.75	0.4
ARRDC4	ATP1A1	12|11	23	11.5	2	7|10|6|19|4|13|16|7|5	0	-41.76	0.72	0.67
ARRDC4	CDC45	0|2	2	1	2	0|0|0|0|0|0|0|0|0	0.48	-1.13	10	0.18
ARRDC4	IPO11	2|0	2	1	2	0|0|0|0|0|0|0|0|0	0.48	-1.13	10	0.18
ARRDC4	IPO13	2|0	2	1	2	0|0|0|0|0|0|0|0|0	0.48	-1.13	10	0.18
ARRDC4	EEF1A1	45|17	62	31	2	10|62|60|16|38|18|52|50|12	0	-199.22	0.53	0.69
ARRDC4	CHP1	3|4	7	3.5	2	0|2|3|1|0|3|5|0|0	0	-9.28	0.95	0.54
ARRDC4	SPNS1	1|1	2	1	2	0|0|0|0|0|0|3|0|0	0	-2.32	1	0.69
ARRDC4	CHAF1B	2|1	3	1.5	2	0|0|0|0|2|0|0|0|0	0.26	-1.26	2.25	0.32
ARRDC4	FBRS	2|0	2	1	2	0|0|0|0|0|0|0|0|0	0.48	-1.13	10	0.18
ARRDC4	CLIP3	2|0	2	1	2	0|0|0|0|0|0|0|0|0	0.48	-1.13	10	0.18
ARRDC4	TIMM50	22|19	41	20.5	2	5|18|12|15|16|13|22|18|15	0	-41.27	1.06	0.67
ARRDC4	DHRS7B	10|11	21	10.5	2	5|11|4|4|9|7|15|11|8	0	-29.78	0.85	0.66
ARRDC4	FGFR1OP	2|2	4	2	2	0|0|0|0|2|0|4|0|0	0.01	-4.6	1	0.45
ARRDC4	CALR	0|2	2	1	2	0|15|21|5|0|0|3|0|0	0	-59.31	0.07	0.69
ARRDC4	CALU	40|28	68	34	2	13|13|4|6|10|9|19|16|2	0.1	-17.08	2.12	0.36
ARRDC4	FAR1	12|11	23	11.5	2	5|4|5|7|7|8|14|14|7	0	-27.02	0.96	0.66
ARRDC4	CDKAL1	1|5	6	3	2	0|0|0|4|0|6|6|0|0	0	-19.85	0.56	0.6
ARRDC4	ACTR1A	3|0	3	1.5	2	0|2|4|0|0|0|0|1|0	0.01	-9.85	0.64	0.47
ARRDC4	FAR2	4|4	8	4	2	4|1|0|0|4|2|4|3|2	0	-8.98	1	0.55
ARRDC4	CHPF	0|2	2	1	2	0|0|0|2|0|0|2|0|0	0.03	-5.73	0.75	0.4
ARRDC4	RPN1	13|7	20	10	2	4|12|14|9|4|7|10|10|3	0	-33.72	0.83	0.65
ARRDC4	AAAS	5|4	9	4.5	2	0|0|0|2|0|4|2|0|0	0.03	-4.3	1.69	0.41
ARRDC4	RPL21	1|1	2	1	2	2|5|8|4|5|1|8|0|0	0	-26.91	0.14	0.69
ARRDC4	PRPF8	24|17	41	20.5	2	5|10|7|6|8|2|9|13|3	0.01	-13.86	1.92	0.47
ARRDC4	PLEKHH3	8|10	18	9	2	2|0|0|4|0|5|8|0|0	0	-9.1	1.59	0.51
ARRDC4	ATP5SL	1|1	2	1	2	0|0|0|0|0|0|0|0|0	0	1.38	10	0.69
ARRDC4	RELT	3|0	3	1.5	2	0|0|0|0|0|0|0|0|0	0.5	-1.13	15	0.12
ARRDC4	SLC47A1	3|0	3	1.5	2	0|0|6|0|0|0|0|2|3	0	-15.65	0.41	0.57
ARRDC4	C5orf42	2|0	2	1	2	0|0|0|0|0|0|0|0|0	0.48	-1.13	10	0.18
ARRDC4	MRPL37	5|4	9	4.5	2	3|3|3|4|2|3|3|3|4	0	-7.81	1.23	0.51
ARRDC4	ARRDC5	4|0	4	2	2	0|0|0|0|0|0|0|0|0	0.5	-1.13	20	0.09
ARRDC4	APP	2|0	2	1	2	0|0|0|0|0|0|0|0|0	0.48	-1.13	10	0.18
ARRDC4	UQCRFS1	2|2	4	2	2	0|2|3|0|0|0|0|0|0	0.03	-3.58	1.2	0.41
ARRDC4	UQCRC2	17|12	29	14.5	2	7|11|15|8|12|6|17|12|3	0	-35.13	0.99	0.66
ARRDC4	XPNPEP3	3|4	7	3.5	2	0|0|0|0|0|4|3|0|0	0.03	-4.33	1.5	0.41
ARRDC4	NUP88	3|2	5	2.5	2	0|14|4|7|0|13|21|18|3	0	-69.96	0.14	0.69
ARRDC4	GGCX	2|0	2	1	2	0|0|0|0|0|0|0|0|0	0.48	-1.13	10	0.18
ARRDC4	SERINC1	1|2	3	1.5	2	0|0|0|0|0|0|0|0|0	0.48	1.38	15	0.18
ARRDC4	TBR1	3|0	3	1.5	2	0|0|0|0|0|0|0|0|0	0.5	-1.13	15	0.12
ARRDC4	NUBPL	5|2	7	3.5	2	0|0|0|3|0|3|4|0|0	0	-9.63	1.05	0.49
ARRDC4	YTHDF2	6|7	13	6.5	2	0|2|1|1|0|3|6|1|1	0.02	-4.98	1.77	0.43
ARRDC4	SUB1	1|2	3	1.5	2	0|0|0|3|0|2|2|0|0	0	-7.6	0.64	0.51
ARRDC4	TKT	0|4	4	2	2	0|9|20|11|0|0|0|0|0	0	-58.1	0.15	0.69
ARRDC4	SDF2L1	0|2	2	1	2	3|14|6|5|3|9|41|16|4	0	-103.67	0.04	0.69
ARRDC4	PPP1R9B	8|5	13	6.5	2	1|0|0|0|3|0|0|0|0	0.85	1.02	4.88	0.02
ARRDC4	FDFT1	2|0	2	1	2	0|0|0|0|0|0|0|0|0	0.48	-1.13	10	0.18
ARRDC4	TARS2	6|4	10	5	2	5|5|2|5|1|8|9|9|0	0	-26.58	0.58	0.65
ARRDC4	ARGLU1	2|0	2	1	2	0|2|0|0|2|0|0|0|3	0	-9.85	0.43	0.51
ARRDC4	LARS	5|8	13	6.5	2	0|6|10|7|0|0|2|0|0	0	-20.77	0.85	0.63
ARRDC4	GJA1	2|0	2	1	2	0|0|0|0|0|0|0|0|0	0.48	-1.13	10	0.18
ARRDC4	TRIM8	2|4	6	3	2	0|0|0|0|0|0|0|0|0	0.98	3.41	30	0
ARRDC4	RPL17-C18orf32	1|1	2	1	2	0|0|0|2|0|1|2|0|0	0	-5.16	0.6	0.69
ARRDC4	TRIM5	3|2	5	2.5	2	0|0|0|0|0|0|0|0|0	0.98	3.41	25	0
ARRDC4	TRIM4	5|5	10	5	2	2|3|0|0|1|0|0|3|1	0.05	-2.92	1.88	0.39
ARRDC4	MDN1	7|10	17	8.5	2	0|0|0|2|0|5|9|4|0	0	-11.71	1.42	0.54
ARRDC4	ANKRD13D	0|4	4	2	2	0|0|0|0|0|0|0|0|0	0.5	-1.13	20	0.09
ARRDC4	ERCC6L	0|3	3	1.5	2	0|0|0|0|0|0|0|0|0	0.5	-1.13	15	0.12
ARRDC4	PRKAA1	1|1	2	1	2	0|1|0|1|0|2|0|1|2	0	-5.16	0.6	0.69
ARRDC4	RPLP2	8|9	17	8.5	2	9|18|22|15|9|15|25|12|12	0	-70.42	0.39	0.69
ARRDC4	RPLP1	3|1	4	2	2	0|3|3|2|0|1|5|2|2	0	-12.93	0.55	0.57
ARRDC4	RPLP0	10|7	17	8.5	2	8|9|13|10|9|14|17|6|9	0	-44.25	0.58	0.69
ARRDC4	EIF2B3	1|1	2	1	2	0|0|0|0|0|0|0|0|0	0	1.38	10	0.69
ARRDC4	PRKAR2A	2|0	2	1	2	0|2|3|0|0|0|0|0|0	0.01	-7.05	0.6	0.43
ARRDC4	MAGT1	2|1	3	1.5	2	3|0|0|2|2|3|3|0|0	0	-10.17	0.5	0.55
ARRDC4	MLF2	2|0	2	1	2	0|0|0|0|0|0|0|0|0	0.48	-1.13	10	0.18
ARRDC4	NUP62	3|0	3	1.5	2	2|7|0|3|2|3|11|9|2	0	-39.14	0.17	0.69
ARRDC4	PRPF40A	2|0	2	1	2	0|1|0|0|0|0|0|3|0	0.05	-5.53	0.75	0.39
ARRDC4	NDFIP2	1|1	2	1	2	0|0|0|0|0|0|0|0|0	0	1.38	10	0.69
ARRDC4	ETFA	4|5	9	4.5	2	1|4|8|7|3|2|3|3|0	0	-17.47	0.71	0.62
ARRDC4	TGFBR1	10|4	14	7	2	0|0|0|0|0|0|0|0|0	1	6.99	70	0
ARRDC4	LARP4B	3|0	3	1.5	2	3|0|0|3|1|5|8|1|3	0	-22.94	0.28	0.62
ARRDC4	CELSR2	2|4	6	3	2	0|0|0|0|0|0|0|0|0	0.98	3.41	30	0
ARRDC4	TMEM145	0|2	2	1	2	0|0|0|0|0|0|0|0|0	0.48	-1.13	10	0.18
ARRDC4	CST3	2|3	5	2.5	2	0|2|2|0|0|0|0|0|0	0.16	-2.6	1.88	0.34
ARRDC4	RPS4X	2|2	4	2	2	4|16|13|11|9|10|14|8|11	0	-55.48	0.14	0.69
ARRDC4	TJP1	2|2	4	2	2	0|0|4|0|10|0|0|0|0	0	-14.16	0.43	0.61
ARRDC4	TCP1	26|23	49	24.5	2	0|17|15|9|0|4|6|5|3	0	-15.96	1.79	0.6
ARRDC4	MAD2L1	2|4	6	3	2	0|0|0|0|0|0|0|0|0	0.98	3.41	30	0
ARRDC4	PRDX6	0|2	2	1	2	0|6|6|5|0|0|0|0|0	0	-24.41	0.18	0.64
ARRDC4	TCEB1	4|1	5	2.5	2	0|0|0|0|3|3|5|0|0	0	-12.93	0.68	0.54
ARRDC4	PRDX4	6|9	15	7.5	2	0|9|11|7|0|3|2|0|0	0	-24.04	0.83	0.64
ARRDC4	PRDX2	4|2	6	3	2	0|10|11|5|0|0|2|0|0	0	-31.26	0.35	0.66
ARRDC4	PRDX1	6|9	15	7.5	2	2|9|22|18|1|3|3|0|0	0	-52.82	0.46	0.68
ARRDC4	SYNJ2BP-COX16	2|2	4	2	2	0|2|0|0|0|0|0|2|0	0.07	-2.6	1.5	0.38
ARRDC4	FYN	2|0	2	1	2	0|0|0|0|0|0|0|0|0	0.48	-1.13	10	0.18
ARRDC4	CCT6A	27|17	44	22	2	0|8|13|9|0|3|5|0|0	0.4	-11.59	2.2	0.3
ARRDC4	CCT6B	0|7	7	3.5	2	0|0|0|0|0|0|0|0|0	0.5	-1.13	35	0.08
ARRDC4	CDC5L	2|2	4	2	2	3|3|7|4|2|4|3|0|0	0	-16.08	0.4	0.69
ARRDC4	SLC16A1	3|2	5	2.5	2	1|9|2|0|2|1|9|6|1	0	-28.42	0.31	0.69
ARRDC4	NSUN2	2|0	2	1	2	0|5|4|0|0|0|0|0|0	0	-12.35	0.33	0.55
ARRDC4	TUBG1	6|4	10	5	2	3|8|0|2|2|4|10|6|0	0	-23.91	0.62	0.64
ARRDC4	ARHGAP32	0|2	2	1	2	0|0|0|0|0|0|0|0|0	0.48	-1.13	10	0.18
ARRDC4	DCAF7	6|3	9	4.5	2	2|4|2|3|1|8|7|5|6	0	-21.99	0.64	0.63
ARRDC4	TARS	2|3	5	2.5	2	0|7|6|8|0|0|3|0|0	0	-24.25	0.36	0.65
ARRDC4	DCAF8	2|1	3	1.5	2	0|0|0|0|0|0|0|0|0	0.48	1.38	15	0.18
ARRDC4	TIMM44	1|1	2	1	2	0|2|3|0|0|0|0|0|0	0	-5.14	0.6	0.69
ARRDC4	TUFM	18|20	38	19	2	14|17|14|15|9|14|20|9|7	0	-35.67	1.1	0.67
ARRDC4	CKB	0|3	3	1.5	2	4|16|17|24|3|4|6|1|0	0	-83.77	0.08	0.69
ARRDC4	ERGIC2	2|1	3	1.5	2	0|0|0|0|0|0|0|0|0	0.48	1.38	15	0.18
ARRDC4	ERGIC1	4|5	9	4.5	2	0|3|1|4|0|5|5|5|3	0	-12.5	0.9	0.59
ARRDC4	HECTD1	2|5	7	3.5	2	0|0|0|0|0|0|0|0|0	0.98	3.41	35	0
ARRDC4	CALM2	4|3	7	3.5	2	1|1|3|0|4|0|0|1|2	0	-6.91	1.17	0.49
ARRDC4	CALM1	4|3	7	3.5	2	1|1|3|0|4|0|0|1|2	0	-6.91	1.17	0.49
ARRDC4	PLK1	3|0	3	1.5	2	0|0|0|0|0|0|0|0|0	0.5	-1.13	15	0.12
ARRDC4	WDR62	1|2	3	1.5	2	0|0|0|0|0|0|0|0|0	0.48	1.38	15	0.18
ARRDC4	CUL7	3|3	6	3	2	0|0|0|0|0|2|6|0|0	0.01	-5.18	1.12	0.46
ARRDC4	TTN	6|0	6	3	2	3|0|0|0|0|0|0|0|0	0.44	-3.72	3	0.29
ARRDC4	HOXD8	2|0	2	1	2	0|8|5|0|0|0|0|9|0	0	-31.76	0.14	0.69
ARRDC4	SLC25A3	45|27	72	36	2	7|17|11|12|12|15|27|19|10	0	-35.66	1.71	0.6
ARRDC4	TRIM25	3|3	6	3	2	0|1|3|0|0|0|0|0|0	0.27	-0.97	2.25	0.31
ARRDC4	SLC25A1	4|7	11	5.5	2	4|6|4|5|6|5|10|10|6	0	-26.58	0.63	0.65
ARRDC4	PRMT1	0|2	2	1	2	0|4|4|0|0|0|0|0|0	0	-11.15	0.38	0.53
ARRDC4	SLC25A6	41|51	92	46	2	12|32|19|18|15|28|43|35|16	0	-70.49	1.25	0.68
ARRDC4	SLC25A5	44|57	101	50.5	2	11|31|20|23|16|33|48|36|18	0	-74.28	1.29	0.68
ARRDC4	SLC25A4	31|37	68	34	2	0|23|14|13|11|20|29|26|11	0	-47.43	1.31	0.67
ARRDC4	PNKD	1|2	3	1.5	2	2|0|0|1|0|1|3|0|0	0	-6.26	0.75	0.47
ARRDC4	MTPAP	2|2	4	2	2	2|0|0|0|2|0|0|0|0	0.07	-2.6	1.5	0.38
ARRDC4	DNAJA2	24|20	44	22	2	12|14|6|16|13|27|35|28|7	0	-79	0.73	0.68
ARRDC4	DNAJA3	19|16	35	17.5	2	10|25|5|29|12|33|103|78|40	0	-267.25	0.24	0.69
ARRDC4	DNAJA1	29|15	44	22	2	9|30|13|17|15|21|47|44|9	0	-130.42	0.55	0.68
ARRDC4	PTPN13	0|2	2	1	2	0|0|0|0|0|2|3|0|0	0.01	-7.05	0.6	0.43
ARRDC4	KIF5B	3|2	5	2.5	2	0|3|5|2|0|0|2|0|0	0	-9.63	0.75	0.54
ARRDC4	ARCN1	10|9	19	9.5	2	4|5|4|2|5|0|2|3|1	0.03	-4.3	2.04	0.41
ARRDC4	NKAP	6|5	11	5.5	2	3|3|3|0|6|0|0|10|6	0	-19.51	0.75	0.63
ARRDC4	UTRN	17|21	38	19	2	9|0|0|2|9|0|1|2|2	0.4	-2.29	2.85	0.3
ARRDC4	DMD	3|3	6	3	2	3|0|0|0|4|0|0|3|1	0	-8.09	0.9	0.54
ARRDC4	GAPDH	5|7	12	6	2	3|33|66|19|3|6|13|13|5	0	-153.07	0.15	0.69
ARRDC4	IFNGR1	4|3	7	3.5	2	0|0|0|0|0|0|0|0|0	1	5.25	35	0
ARRDC4	SEC16A	15|13	28	14	2	2|2|0|7|2|19|23|11|0	0	-44.34	0.79	0.67
ARRDC4	RICTOR	7|4	11	5.5	2	0|2|0|6|2|14|19|5|3	0	-43.75	0.42	0.67
ARRDC4	IARS2	5|4	9	4.5	2	2|0|0|2|2|1|0|0|0	0.23	-2.01	2.25	0.32
ARRDC4	ABCF1	0|2	2	1	2	0|2|2|0|0|0|0|0|0	0.03	-5.73	0.75	0.4
ARRDC4	RNF130	2|2	4	2	2	0|0|0|0|0|0|0|0|0	0.97	3.41	20	0.01
ARRDC4	DNAJB12	4|3	7	3.5	2	3|6|3|2|2|1|1|9|2	0	-17.92	0.58	0.63
ARRDC4	DNAJB11	12|11	23	11.5	2	10|25|11|16|10|25|37|32|19	0	-103.15	0.37	0.69
ARRDC4	PPP6C	4|2	6	3	2	0|3|0|0|0|2|2|2|0	0.02	-6.03	1.29	0.42
ARRDC4	PJA1	2|2	4	2	2	0|0|0|0|0|0|0|0|0	0.97	3.41	20	0.01
ARRDC4	MRPL4	3|5	8	4	2	5|5|3|5|3|5|7|2|3	0	-16.76	0.71	0.61
ARRDC4	PCDHA12	0|2	2	1	2	0|0|0|0|0|0|0|0|0	0.48	-1.13	10	0.18
ARRDC4	ECM29	2|1	3	1.5	2	0|0|0|0|0|0|0|0|0	0.48	1.38	15	0.18
ARRDC4	SLC3A2	4|3	7	3.5	2	0|2|2|1|0|2|0|0|0	0.08	-3.39	1.75	0.37
ARRDC4	DDR1	7|4	11	5.5	2	0|0|0|0|0|0|0|0|0	1	6.99	55	0
ARRDC4	LRCH2	2|0	2	1	2	0|0|0|0|0|0|0|0|0	0.48	-1.13	10	0.18
ARRDC4	PTDSS1	4|2	6	3	2	0|0|0|0|0|0|0|0|0	0.98	3.41	30	0
ARRDC4	BAG5	4|4	8	4	2	0|0|0|0|0|0|0|0|0	1	6.99	40	0
ARRDC4	MYO1C	15|9	24	12	2	3|4|7|11|7|18|18|5|10	0	-44.26	0.77	0.67
ARRDC4	EVI5L	3|0	3	1.5	2	0|0|0|0|0|0|0|0|0	0.5	-1.13	15	0.12
ARRDC4	RPS6	4|3	7	3.5	2	2|11|11|8|2|2|9|2|3	0	-35.65	0.34	0.69
ARRDC4	RPS3	3|5	8	4	2	4|19|24|14|4|9|23|5|5	0	-85.5	0.18	0.69
ARRDC4	RPS2	3|5	8	4	2	1|7|11|5|3|5|8|3|3	0	-28.77	0.46	0.69
ARRDC4	VDAC3	4|4	8	4	2	3|4|7|6|1|1|0|2|0	0	-14.98	0.71	0.62
ARRDC4	VDAC2	8|6	14	7	2	3|10|9|6|2|5|4|8|4	0	-24.04	0.78	0.64
ARRDC4	VDAC1	8|11	19	9.5	2	0|14|19|14|0|10|12|5|3	0	-46.16	0.61	0.67
ARRDC4	RPS9	2|4	6	3	2	6|9|10|7|4|6|11|4|4	0	-36.86	0.3	0.69
ARRDC4	RPS8	0|5	5	2.5	2	2|7|14|9|3|3|3|1|4	0	-43.56	0.25	0.69
ARRDC4	CTPS1	0|2	2	1	2	0|0|0|3|0|0|0|0|0	0.15	-3.72	1	0.34
ARRDC4	DEF8	2|1	3	1.5	2	0|2|0|0|0|2|3|2|0	0	-7.6	0.64	0.51
ARRDC4	PSMA2	8|5	13	6.5	2	0|3|8|0|0|0|0|1|0	0.02	-7.03	1.62	0.43
ARRDC4	PSMA1	11|6	17	8.5	2	0|2|2|3|0|0|0|0|0	0.69	-0.49	3.64	0.03
ARRDC4	PSMA6	8|6	14	7	2	0|0|0|4|0|1|1|0|0	0.75	0.35	3.5	0.02
ARRDC4	PSMA7	7|5	12	6	2	0|6|6|3|0|3|2|0|0	0	-11.06	1.2	0.55
ARRDC4	PSMA4	3|3	6	3	2	0|4|2|4|0|2|3|2|0	0	-9.28	0.82	0.56
ARRDC4	PSMA5	11|15	26	13	2	0|2|5|5|0|0|0|0|0	0.8	0.46	3.25	0.02
ARRDC4	SLC6A15	1|2	3	1.5	2	0|0|0|0|0|0|0|0|0	0.48	1.38	15	0.18
ARRDC4	DNAJB1	9|7	16	8	2	0|4|7|2|0|2|0|2|2	0.02	-5.85	1.85	0.43
ARRDC4	SF3B3	4|4	8	4	2	0|10|5|5|3|4|2|4|5	0	-18.75	0.6	0.69
ARRDC4	ATXN10	3|4	7	3.5	2	0|8|3|1|0|0|3|0|0	0	-12.79	0.75	0.59
ARRDC4	NMU	0|2	2	1	2	0|0|0|0|0|0|0|0|0	0.48	-1.13	10	0.18
ARRDC4	TRAFD1	6|3	9	4.5	2	0|0|0|0|0|0|0|0|0	1	5.25	45	0
ARRDC4	MYL12B	1|1	2	1	2	0|1|3|0|0|0|0|0|0	0	-3.84	0.75	0.69
ARRDC4	RPSA	3|4	7	3.5	2	2|7|11|7|2|5|8|4|3	0	-28.77	0.4	0.69
ARRDC4	MYO19	7|7	14	7	2	4|0|0|4|4|3|8|4|0	0	-9.35	1.31	0.56
ARRDC4	TMPO	3|3	6	3	2	2|10|9|12|5|3|10|5|2	0	-37.04	0.28	0.69
ARRDC4	MCM3AP	3|2	5	2.5	2	0|4|0|0|2|6|11|7|1	0	-28.42	0.31	0.69
ARRDC4	GCDH	5|8	13	6.5	2	4|1|1|2|3|2|6|2|1	0.01	-8.71	1.5	0.46
ARRDC4	RPL29	1|2	3	1.5	2	2|2|3|4|2|4|3|2|2	0	-12.93	0.41	0.69
ARRDC4	RPL28	2|2	4	2	2	0|3|2|3|0|3|3|0|0	0	-8.34	0.67	0.54
ARRDC4	RPL24	6|7	13	6.5	2	4|5|4|12|6|8|11|4|5	0	-29.17	0.63	0.66
ARRDC4	RPL27	4|2	6	3	2	2|7|9|3|4|2|7|0|2	0	-27.05	0.39	0.69
ARRDC4	NAP1L4	3|2	5	2.5	2	0|3|4|2|0|0|2|0|0	0	-8.34	0.83	0.52
ARRDC4	RPL23	59|68	127	63.5	2	62|65|19|63|55|63|116|72|61	0	-215.18	0.75	0.69
ARRDC4	RPL22	1|1	2	1	2	1|1|3|3|1|1|2|0|1	0	-8.93	0.38	0.69
ARRDC4	MAPKAP1	2|1	3	1.5	2	0|0|0|1|0|1|2|0|0	0.04	-3.96	1.12	0.4
ARRDC4	LPCAT1	4|4	8	4	2	2|3|3|2|0|3|4|3|2	0	-6.63	1.2	0.5
ARRDC4	APMAP	1|2	3	1.5	2	0|0|0|2|0|1|1|0|0	0.04	-3.96	1.12	0.4
ARRDC4	SPAG5	1|1	2	1	2	0|0|0|0|0|0|0|0|0	0	1.38	10	0.69
ARRDC4	IL1RAP	4|1	5	2.5	2	0|0|0|0|0|0|0|0|0	0.5	1.38	25	0.09
ARRDC4	EPCAM	1|3	4	2	2	0|0|0|0|0|0|0|0|0	0.5	1.38	20	0.12
ARRDC4	KIAA1147	1|1	2	1	2	0|0|0|0|0|0|0|0|0	0	1.38	10	0.69
ARRDC4	PPP1CC	7|2	9	4.5	2	0|0|0|1|6|0|3|0|0	0.03	-9.44	1.35	0.4
ARRDC4	PPP1CA	6|2	8	4	2	0|4|0|2|0|2|5|4|2	0	-13.47	0.92	0.53
ARRDC4	SRRM1	5|2	7	3.5	2	1|6|5|2|8|3|10|9|6	0	-32.63	0.39	0.69
ARRDC4	SRRM2	7|7	14	7	2	7|2|3|8|4|0|0|0|0	0	-12.86	1.11	0.6
ARRDC4	CCDC175	1|1	2	1	2	0|0|0|0|0|0|0|0|0	0	1.38	10	0.69
ARRDC4	PDK3	1|3	4	2	2	3|0|0|0|0|2|3|0|0	0	-8.93	0.75	0.5
ARRDC4	KANK2	3|2	5	2.5	2	0|0|0|0|0|2|7|2|3	0	-11.96	0.62	0.58
ARRDC4	SEC61A1	4|4	8	4	2	0|2|0|3|0|4|5|3|2	0	-8.98	1	0.55
ARRDC4	SEC61A2	0|2	2	1	2	0|0|0|0|0|0|0|0|0	0.48	-1.13	10	0.18
ARRDC4	ZFAND5	1|1	2	1	2	0|0|0|0|0|0|0|0|0	0	1.38	10	0.69
ARRDC4	CANX	2|2	4	2	2	0|14|16|5|0|0|2|3|0	0	-43.59	0.17	0.69
ARRDC4	SLC39A10	1|1	2	1	2	0|0|0|0|0|0|0|0|0	0	1.38	10	0.69
ARRDC4	SLC39A11	2|2	4	2	2	0|0|0|0|0|0|0|0|0	0.97	3.41	20	0.01
ARRDC4	PFKM	2|3	5	2.5	2	4|2|0|0|3|4|4|7|4	0	-16.08	0.5	0.69
ARRDC4	NTRK3	1|1	2	1	2	0|0|0|0|0|0|0|0|0	0	1.38	10	0.69
ARRDC4	HSP90AB1	123|96	219	109.5	2	16|64|99|48|13|22|37|19|11	0	-111.78	1.56	0.68
ARRDC4	MRPS7	2|2	4	2	2	3|0|0|1|2|1|1|0|0	0.01	-4.84	1	0.46
ARRDC4	ATG2B	5|5	10	5	2	0|0|0|0|0|0|0|0|0	1	8.67	50	0
ARRDC4	UBR5	30|23	53	26.5	2	5|25|0|14|5|33|57|31|16	0	-112.69	0.66	0.68
ARRDC4	UBR4	23|22	45	22.5	2	0|0|0|18|0|24|41|0|0	0	-66.06	0.81	0.68
ARRDC4	EEF1G	10|9	19	9.5	2	4|10|17|10|5|3|9|7|3	0	-31.39	0.77	0.66
ARRDC4	EEF1D	0|2	2	1	2	0|4|18|4|0|0|2|0|0	0	-36.84	0.12	0.69
ARRDC4	FAT1	0|3	3	1.5	2	0|0|0|0|0|0|0|0|0	0.5	-1.13	15	0.12
ARRDC4	WUGSC:H_RG122E10.2a	1|1	2	1	2	0|0|0|0|0|0|0|0|0	0	1.38	10	0.69
ARRDC4	EIF4G1	1|2	3	1.5	2	0|12|12|7|0|0|1|0|0	0	-41.35	0.15	0.69
ARRDC4	TRIM38	2|0	2	1	2	0|0|0|0|0|0|0|0|0	0.48	-1.13	10	0.18
ARRDC4	RPL8	1|2	3	1.5	2	0|2|9|4|0|1|2|0|2	0	-18.04	0.3	0.69
ARRDC4	TRIM32	4|3	7	3.5	2	2|0|0|3|4|6|13|3|2	0	-24.31	0.46	0.65
ARRDC4	PTPMT1	10|7	17	8.5	2	0|1|1|2|2|5|5|3|1	0.07	-5.88	1.96	0.38
ARRDC4	RSAD1	2|1	3	1.5	2	0|0|0|0|0|0|0|0|0	0.48	1.38	15	0.18
ARRDC4	ATP5C1	5|5	10	5	2	4|6|6|4|3|2|6|3|0	0	-14.57	0.83	0.61
ARRDC4	SKIV2L	2|0	2	1	2	0|0|0|0|0|0|0|0|0	0.48	-1.13	10	0.18
ARRDC4	EEF1A1P5	0|17	17	8.5	2	10|0|0|16|0|18|0|0|12	0	-67.39	0.55	0.66
ARRDC4	MRPL14	3|3	6	3	2	4|4|3|5|3|2|4|3|2	0	-11.68	0.69	0.69
ARRDC4	RCN2	26|15	41	20.5	2	5|27|13|13|12|23|37|26|9	0	-88.71	0.68	0.68
ARRDC4	RCN1	13|10	23	11.5	2	9|18|7|12|9|17|26|25|6	0	-71.3	0.5	0.69
ARRDC4	RHOU	1|1	2	1	2	0|0|0|0|0|0|0|0|0	0	1.38	10	0.69
ARRDC4	ARPC4	3|3	6	3	2	0|3|2|0|2|0|0|0|1	0.01	-4.55	1.29	0.45
ARRDC4	POLR2C	9|7	16	8	2	0|2|0|3|2|3|5|2|0	0.15	-3.61	2.18	0.35
ARRDC4	POLR2B	17|11	28	14	2	4|3|3|3|2|7|9|3|0	0.19	-8.39	2.1	0.33
ARRDC4	ITPR2	2|3	5	2.5	2	0|0|0|0|0|0|0|0|0	0.98	3.41	25	0
ARRDC4	ITPR3	4|2	6	3	2	0|0|0|0|0|0|0|0|0	0.98	3.41	30	0
ARRDC4	ANKRD28	4|3	7	3.5	2	0|0|0|0|0|3|13|0|0	0	-14.52	0.66	0.6
ARRDC4	LRIG3	2|2	4	2	2	0|0|0|0|0|0|0|0|0	0.97	3.41	20	0.01
ARRDC4	LRIG2	5|0	5	2.5	2	0|0|0|0|0|0|0|0|0	0.5	-1.13	25	0.08
ARRDC4	USP54	3|0	3	1.5	2	0|0|0|0|0|0|4|0|0	0.18	-5.2	1.12	0.33
ARRDC4	ITM2C	5|8	13	6.5	2	3|0|0|2|0|5|4|0|0	0.02	-7.54	1.62	0.43
ARRDC4	POLRMT	1|1	2	1	2	0|0|0|1|3|0|3|0|0	0	-7.6	0.43	0.69
ARRDC4	RER1	1|2	3	1.5	2	2|2|1|0|1|0|0|1|0	0.01	-5.16	0.9	0.44
ARRDC4	AIFM1	24|18	42	21	2	9|11|9|8|7|8|11|6|1	0.02	-11.36	2.03	0.43
ARRDC4	GRPEL1	0|4	4	2	2	0|1|3|5|2|3|16|5|0	0	-37.07	0.23	0.66
ARRDC4	CTNNA2	4|0	4	2	2	0|0|0|3|0|0|4|0|0	0.02	-9.68	0.86	0.42
ARRDC4	TMEM30A	4|1	5	2.5	2	0|0|0|0|0|0|0|0|0	0.5	1.38	25	0.09
ARRDC4	RPL4	3|1	4	2	2	0|5|14|5|0|0|3|0|0	0	-30.71	0.25	0.69
ARRDC4	AMFR	3|2	5	2.5	2	0|0|0|1|0|2|6|0|0	0	-8.03	0.83	0.52
ARRDC4	HIST1H1D	3|6	9	4.5	2	2|4|5|7|5|4|5|3|3	0	-16.76	0.79	0.6
ARRDC4	HIST1H1E	3|6	9	4.5	2	2|4|5|7|5|4|5|3|3	0	-16.76	0.79	0.6
ARRDC4	H2AFY	0|2	2	1	2	0|0|7|0|2|0|0|0|0	0	-12.04	0.33	0.54
ARRDC4	PRKACA	3|2	5	2.5	2	0|2|1|0|0|0|0|1|0	0.16	-2.47	1.88	0.34
ARRDC4	PSMB6	2|2	4	2	2	0|2|2|0|0|0|0|0|0	0.07	-2.6	1.5	0.38
ARRDC4	PSMB4	9|6	15	7.5	2	0|6|8|3|0|3|0|3|0	0	-12.01	1.32	0.54
ARRDC4	PSMB1	11|7	18	9	2	2|6|10|1|1|0|4|5|0	0	-15.21	1.29	0.57
ARRDC4	MKI67	4|7	11	5.5	2	1|0|0|0|11|0|0|0|0	0.01	-7.98	1.38	0.45
ARRDC4	ZNF318	14|9	23	11.5	2	6|9|0|9|6|15|25|13|18	0	-58.65	0.59	0.68
ARRDC4	ANKHD1	4|2	6	3	2	0|15|6|14|0|25|30|22|7	0	-105.02	0.12	0.69
ARRDC4	HIST1H2AA	6|7	13	6.5	2	0|0|17|0|10|0|6|0|0	0	-31.34	0.59	0.66
ARRDC4	HSPBP1	3|3	6	3	2	0|0|0|3|0|0|1|0|0	0.27	-0.97	2.25	0.31
ARRDC4	PRPF19	4|0	4	2	2	3|4|4|4|2|2|10|5|1	0	-27.2	0.32	0.63
ARRDC4	HADHA	12|10	22	11	2	0|7|19|8|0|3|3|0|0	0	-25.59	0.97	0.65
ARRDC4	ADRM1	2|3	5	2.5	2	0|0|0|0|0|0|0|0|0	0.98	3.41	25	0
ARRDC4	TRAF2	2|2	4	2	2	0|0|0|0|0|0|0|0|0	0.97	3.41	20	0.01
ARRDC4	HOOK2	3|0	3	1.5	2	0|0|0|0|0|0|0|0|0	0.5	-1.13	15	0.12
ARRDC4	HOOK1	2|1	3	1.5	2	0|0|0|0|0|0|0|0|0	0.48	1.38	15	0.18
ARRDC4	TMEM165	8|0	8	4	2	0|5|5|1|0|0|6|2|0	0	-22.92	0.75	0.55
ARRDC4	LRRC59	0|3	3	1.5	2	2|7|6|7|3|0|3|4|0	0	-28.82	0.22	0.69
ARRDC4	DIS3	5|3	8	4	2	0|0|0|4|0|0|0|0|0	0.54	-0.57	3	0.05
ARRDC4	RPL38	8|7	15	7.5	2	6|19|3|14|7|13|28|14|12	0	-66.97	0.37	0.69
ARRDC4	RPL36	0|2	2	1	2	3|0|0|3|4|0|3|0|0	0	-14.17	0.3	0.57
ARRDC4	RPL34	0|2	2	1	2	1|0|0|2|1|2|2|0|0	0	-8.36	0.5	0.47
ARRDC4	RPL31	1|2	3	1.5	2	3|4|4|4|2|3|4|1|0	0	-14.24	0.38	0.69
ARRDC4	TARBP2	1|2	3	1.5	2	0|0|0|0|0|3|3|0|0	0	-6.17	0.75	0.47
ARRDC4	GNA13	3|0	3	1.5	2	0|0|0|0|0|0|0|0|0	0.5	-1.13	15	0.12
ARRDC4	SDHA	1|1	2	1	2	0|4|3|0|0|0|0|0|0	0	-7.43	0.43	0.69
ARRDC4	SHARPIN	2|2	4	2	2	0|0|0|0|0|0|0|0|0	0.97	3.41	20	0.01
ARRDC4	TAP1	2|1	3	1.5	2	1|2|2|1|1|3|6|3|0	0	-14.24	0.38	0.69
ARRDC4	ZCCHC17	2|3	5	2.5	2	0|2|2|0|0|0|0|4|0	0	-7.22	0.94	0.5
ARRDC4	PSPC1	2|1	3	1.5	2	0|3|3|2|2|4|0|1|0	0	-11.56	0.45	0.57
ARRDC4	IL6ST	3|3	6	3	2	0|0|0|0|0|0|0|0|0	0.99	5.25	30	0
ARRDC4	DBN1	1|1	2	1	2	0|0|0|0|6|0|0|0|0	0	-5.47	0.5	0.69
ARRDC4	SDF4	9|5	14	7	2	2|20|3|7|4|11|27|12|3	0	-69.21	0.36	0.69
ARRDC4	SDF2	2|2	4	2	2	1|15|2|7|3|13|40|19|5	0	-99.75	0.08	0.69
ARRDC4	PTGER1	2|3	5	2.5	2	0|0|0|0|0|0|0|0|0	0.98	3.41	25	0
ARRDC4	MIB2	4|2	6	3	2	3|0|0|0|3|1|4|0|0	0	-9.63	0.9	0.52
ARRDC4	GRWD1	2|0	2	1	2	0|0|0|0|0|0|0|0|0	0.48	-1.13	10	0.18
ARRDC4	B3GALT6	2|1	3	1.5	2	2|0|0|0|1|0|0|0|0	0.11	-2.76	1.5	0.36
ARRDC4	CAMK2D	4|7	11	5.5	2	0|0|0|0|0|0|0|0|0	1	6.99	55	0
ARRDC4	CAMK2G	5|6	11	5.5	2	0|0|0|0|0|0|0|0|0	1	8.67	55	0
ARRDC4	OSBPL8	7|4	11	5.5	2	1|4|2|0|4|2|5|4|2	0	-10.17	1.27	0.5
ARRDC4	STK3	5|5	10	5	2	5|4|0|11|6|18|19|8|6	0	-54.25	0.31	0.69
ARRDC4	TUBB4B	219|199	418	209	2	95|213|163|168|94|231|355|216|103	0	-661.68	0.78	0.69
ARRDC4	TUBB4A	178|157	335	167.5	2	74|158|116|138|72|186|261|160|76	0	-489.91	0.83	0.69
ARRDC4	AKAP8	4|4	8	4	2	2|7|0|0|0|0|0|8|6	0	-20	0.57	0.64
ARRDC4	ZSCAN18	3|0	3	1.5	2	0|0|0|2|0|3|8|0|0	0	-18.23	0.35	0.59
ARRDC4	STARD3	2|0	2	1	2	0|0|0|0|0|0|0|0|0	0.48	-1.13	10	0.18
ARRDC4	YBX1	7|6	13	6.5	2	3|17|16|7|4|11|30|15|6	0	-72.15	0.31	0.69
ARRDC4	YBX3	7|5	12	6	2	0|12|15|9|4|8|32|9|0	0	-68.86	0.31	0.69
ARRDC4	CAPZB	3|5	8	4	2	2|2|7|3|1|0|0|0|0	0	-10.25	1	0.53
ARRDC4	HSP90B1	13|17	30	15	2	5|29|33|16|4|3|7|3|0	0	-76.48	0.58	0.68
ARRDC4	TANGO6	2|1	3	1.5	2	0|0|0|0|0|0|0|0|0	0.48	1.38	15	0.18
ARRDC4	POLR1C	2|2	4	2	2	0|3|3|0|0|0|0|1|2	0	-7.22	0.75	0.52
ARRDC4	STIP1	0|3	3	1.5	2	0|5|10|6|0|0|1|0|0	0	-30.26	0.21	0.65
ARRDC4	PEG10	2|2	4	2	2	0|0|0|0|0|0|0|0|0	0.97	3.41	20	0.01
ARRDC4	DSP	23|17	40	20	2	19|34|235|12|32|19|15|23|41	0	-390.85	0.19	0.69
ARRDC4	SAMM50	6|6	12	6	2	3|2|2|0|2|4|3|3|0	0.02	-3.83	1.8	0.42
ARRDC4	TYRO3	3|0	3	1.5	2	0|0|0|0|0|0|0|0|0	0.5	-1.13	15	0.12
ARRDC4	DCDC2	6|3	9	4.5	2	5|1|0|2|6|3|5|2|3	0	-15.46	0.84	0.59
ARRDC4	CSNK1A1	0|2	2	1	2	3|5|1|5|7|6|11|2|8	0	-37.68	0.12	0.69
ARRDC4	DNAJC7	12|10	22	11	2	0|6|6|3|0|0|0|0|0	0.1	-4.09	2.2	0.36
ARRDC4	RING1	2|0	2	1	2	0|0|0|0|0|0|4|0|0	0.07	-5.2	0.75	0.38
ARRDC4	TTC37	4|4	8	4	2	0|0|0|0|0|0|0|0|0	1	6.99	40	0
ARRDC4	SORT1	5|5	10	5	2	0|2|0|2|0|4|4|3|0	0	-6.37	1.36	0.5
ARRDC4	GFPT1	7|8	15	7.5	2	0|6|6|5|0|0|0|0|0	0	-10.52	1.32	0.56
ARRDC4	INA	11|8	19	9.5	2	0|0|0|0|8|0|0|0|4	0.17	-3.38	2.38	0.34
ARRDC4	SDCCAG3	2|0	2	1	2	0|4|0|5|2|13|13|3|0	0	-44.84	0.1	0.69
ARRDC4	PRKDC	117|117	234	117	2	13|11|13|34|9|36|49|9|6	1	7.37	2.95	0
ARRDC4	MKRN2	5|4	9	4.5	2	2|0|0|0|0|0|0|0|0	0.88	1.71	6.75	0.01
ARRDC4	CDIPT	3|3	6	3	2	0|0|0|0|0|0|0|0|0	0.99	5.25	30	0
ARRDC4	NR2F1	3|2	5	2.5	2	0|0|0|0|0|0|0|0|0	0.98	3.41	25	0
ARRDC4	DDB1	27|26	53	26.5	2	15|11|6|20|10|30|46|16|10	0	-75.48	0.83	0.68
ARRDC4	RIF1	3|4	7	3.5	2	0|0|0|0|0|0|0|0|0	1	5.25	35	0
ARRDC4	MECP2	2|3	5	2.5	2	0|0|0|0|4|0|0|0|0	0.25	-1.79	1.88	0.32
ARRDC4	SLC27A4	2|4	6	3	2	3|0|5|3|2|3|6|1|3	0	-14.8	0.64	0.59
ARRDC4	SLC27A6	3|3	6	3	2	0|0|0|0|0|0|0|0|0	0.99	5.25	30	0
ARRDC4	PDE10A	2|2	4	2	2	0|0|0|0|0|0|3|0|0	0.31	-0.8	2	0.3
ARRDC4	CAPZA2	2|1	3	1.5	2	2|3|5|3|3|1|0|0|2	0	-12.93	0.41	0.69
ARRDC4	CAPZA1	5|3	8	4	2	0|3|10|0|0|0|0|0|0	0	-10.93	0.92	0.54
ARRDC4	GEMIN4	8|6	14	7	2	0|0|0|3|0|4|1|0|0	0.44	-1.59	2.62	0.29
ARRDC4	HSPE1	0|3	3	1.5	2	0|9|5|7|0|1|2|0|0	0	-30.26	0.21	0.65
ARRDC4	PRKD2	2|2	4	2	2	0|0|0|0|0|0|0|0|0	0.97	3.41	20	0.01
ARRDC4	CTTN	4|4	8	4	2	1|3|7|2|4|1|0|0|0	0	-11.35	0.86	0.58
ARRDC4	KRBA1	0|2	2	1	2	0|0|0|0|0|0|0|0|0	0.48	-1.13	10	0.18
ARRDC4	WRNIP1	2|0	2	1	2	0|0|0|0|0|0|0|0|0	0.48	-1.13	10	0.18
ARRDC4	ERAL1	6|5	11	5.5	2	3|4|0|2|3|2|4|3|0	0	-6.37	1.5	0.47
ARRDC4	DDX17	6|7	13	6.5	2	0|10|10|7|0|3|5|3|13	0	-31.75	0.59	0.66
ARRDC4	CDK16	0|3	3	1.5	2	0|0|0|0|0|0|0|0|0	0.5	-1.13	15	0.12
ARRDC4	CDK17	0|3	3	1.5	2	3|0|0|0|0|0|9|0|4	0	-22.71	0.28	0.62
ARRDC4	GPR126	2|2	4	2	2	0|0|0|0|0|0|0|0|0	0.97	3.41	20	0.01
ARRDC4	TMEM55A	1|1	2	1	2	0|0|0|0|0|0|0|0|0	0	1.38	10	0.69
ARRDC4	TMEM55B	1|1	2	1	2	0|0|0|0|0|0|0|0|0	0	1.38	10	0.69
ARRDC4	NEO1	5|0	5	2.5	2	0|0|0|0|0|0|0|0|0	0.5	-1.13	25	0.08
ARRDC4	PSMC1	18|12	30	15	2	0|2|9|5|0|4|7|0|0	0.21	-8.17	2.14	0.33
ARRDC4	ATP6V1B2	1|1	2	1	2	0|3|9|0|0|0|0|0|0	0	-13.52	0.25	0.69
ARRDC4	PSMC3	16|8	24	12	2	2|5|11|2|0|0|2|0|0	0.07	-9.79	2	0.37
ARRDC4	EFR3A	2|4	6	3	2	0|0|0|0|0|0|0|0|0	0.98	3.41	30	0
ARRDC4	PSMC6	12|8	20	10	2	0|5|5|0|0|0|0|0|0	0.5	-1.58	3	0.18
ARRDC4	EFR3B	1|2	3	1.5	2	0|0|0|0|0|0|0|0|0	0.48	1.38	15	0.18
ARRDC4	HEATR6	6|4	10	5	2	0|0|0|0|0|0|0|0|0	1	6.99	50	0
ARRDC4	HEATR3	2|1	3	1.5	2	0|0|0|0|0|0|0|0|0	0.48	1.38	15	0.18
ARRDC4	HEATR1	3|3	6	3	2	0|0|0|0|0|0|0|0|0	0.99	5.25	30	0
ARRDC4	TRIP13	14|12	26	13	2	3|4|0|2|5|4|4|3|2	0.81	0.65	3	0.02
ARRDC4	SEC61B	1|2	3	1.5	2	0|0|0|0|0|0|0|0|0	0.48	1.38	15	0.18
ARRDC4	NUP35	0|2	2	1	2	0|0|0|0|0|0|0|0|0	0.48	-1.13	10	0.18
ARRDC4	NCLN	9|9	18	9	2	10|0|0|0|6|0|0|0|0	0	-6.27	1.69	0.5
ARRDC4	NCL	4|4	8	4	2	4|18|23|21|5|3|7|0|9	0	-76.68	0.19	0.69
ARRDC4	SLC1A5	5|5	10	5	2	4|6|2|3|3|2|3|6|0	0	-12.24	0.94	0.59
ARRDC4	MT-CO2	6|3	9	4.5	2	2|4|5|5|1|2|6|4|0	0	-15.46	0.84	0.59
ARRDC4	GPATCH8	3|2	5	2.5	2	0|0|0|0|0|0|0|0|0	0.98	3.41	25	0
ARRDC4	2018-03-07	4|5	9	4.5	2	0|0|0|0|0|0|0|0|0	1	6.99	45	0
ARRDC4	EIF3C	1|1	2	1	2	0|1|3|3|0|0|0|0|0	0	-7.6	0.43	0.69
ARRDC4	EIF3F	1|1	2	1	2	0|2|2|4|0|0|1|0|0	0	-8.93	0.38	0.69
ARRDC4	EPHA7	6|5	11	5.5	2	0|0|0|0|0|0|0|0|0	1	8.67	55	0
ARRDC4	RARS	4|6	10	5	2	0|5|8|6|0|0|2|0|0	0	-17.47	0.79	0.62
ARRDC4	DYRK1A	4|2	6	3	2	0|1|0|0|2|1|6|5|5	0	-17.45	0.56	0.61
ARRDC4	GINM1	1|1	2	1	2	0|0|0|0|0|0|0|0|0	0	1.38	10	0.69
ARRDC4	DAAM1	3|2	5	2.5	2	0|0|0|0|0|0|0|0|0	0.98	3.41	25	0
ARRDC4	NOMO2	1|1	2	1	2	0|2|1|0|0|0|0|1|0	0	-3.96	0.75	0.69
ARRDC4	NOMO1	1|1	2	1	2	0|0|0|0|0|0|0|0|0	0	1.38	10	0.69
ARRDC4	YIF1B	3|2	5	2.5	2	0|0|0|0|0|0|0|0|0	0.98	3.41	25	0
ARRDC4	EDEM3	7|5	12	6	2	0|0|0|0|0|2|2|0|0	0.93	1.9	4.5	0.01
ARRDC4	PHGDH	19|12	31	15.5	2	10|10|17|8|9|8|8|11|2	0	-27.97	1.22	0.64
ARRDC4	NTPCR	0|3	3	1.5	2	3|3|5|2|3|1|3|0|3	0	-15.64	0.41	0.57
ARRDC4	VAT1	0|2	2	1	2	0|3|7|6|0|0|0|0|0	0	-22.92	0.19	0.63
ARRDC4	SLC2A1	2|0	2	1	2	0|0|0|0|0|0|0|0|0	0.48	-1.13	10	0.18
ARRDC4	UBA52	1|1	2	1	2	0|0|0|1|0|1|1|0|0	0	-2.76	1	0.69
ARRDC4	RPL37A	1|1	2	1	2	1|3|1|2|1|2|2|0|0	0	-7.6	0.43	0.69
ARRDC4	NCSTN	1|1	2	1	2	0|2|3|3|0|2|4|2|0	0	-11.56	0.3	0.69
ARRDC4	BCKDK	2|2	4	2	2	2|0|0|0|1|5|4|0|0	0	-10.91	0.55	0.58
ARRDC4	VANGL1	3|2	5	2.5	2	0|0|0|0|0|0|0|0|0	0.98	3.41	25	0
ARRDC4	VANGL2	3|0	3	1.5	2	0|0|0|0|0|0|0|0|0	0.5	-1.13	15	0.12
ARRDC4	MADD	2|0	2	1	2	0|0|0|0|0|0|0|0|0	0.48	-1.13	10	0.18
ARRDC4	CBWD1	0|2	2	1	2	0|0|0|0|0|0|0|0|0	0.48	-1.13	10	0.18
ARRDC4	TCP11L1	5|4	9	4.5	2	2|0|0|1|1|3|12|0|0	0	-14.33	0.79	0.6
ARRDC4	NES	3|4	7	3.5	2	0|0|0|0|2|0|0|0|0	0.78	0.92	5.25	0.02
ARRDC4	FARP2	4|2	6	3	2	0|0|0|0|0|0|0|0|0	0.98	3.41	30	0
ARRDC4	COPB1	17|14	31	15.5	2	0|4|7|3|0|5|4|4|1	0.73	-0.03	2.91	0.03
ARRDC4	ICMT	2|2	4	2	2	0|0|0|0|0|3|1|0|0	0.09	-2.27	1.5	0.37
ARRDC4	SNAP47	2|1	3	1.5	2	0|0|0|0|0|1|8|0|0	0	-9.35	0.5	0.54
ARRDC4	PCDH17	2|0	2	1	2	0|0|0|0|0|0|0|0|0	0.48	-1.13	10	0.18
ARRDC4	EEF1E1	1|1	2	1	2	0|0|0|0|0|0|0|0|0	0	1.38	10	0.69
ARRDC4	RALA	2|2	4	2	2	0|0|0|0|0|0|0|0|0	0.97	3.41	20	0.01
ARRDC4	KRT77	0|8	8	4	2	0|0|33|0|0|33|19|22|16	0	-130.01	0.14	0.69
ARRDC4	TMEM126A	7|4	11	5.5	2	0|3|0|0|0|0|6|3|0	0	-8.98	1.38	0.47
ARRDC4	TMEM126B	2|2	4	2	2	0|0|0|0|0|0|0|0|0	0.97	3.41	20	0.01
ARRDC4	SMPD4	2|1	3	1.5	2	0|4|0|2|0|2|10|3|0	0	-20.96	0.26	0.69
ARRDC4	STXBP3	1|3	4	2	2	0|0|0|0|0|0|0|0|0	0.5	1.38	20	0.12
ARRDC4	PODN	2|2	4	2	2	0|0|0|1|0|0|2|0|0	0.21	-1.31	2	0.32
ARRDC4	SKP1	1|1	2	1	2	2|5|0|2|2|2|5|2|2	0	-14.24	0.25	0.69
ARRDC4	DNAJB2	2|0	2	1	2	0|0|0|0|0|2|2|0|0	0.03	-5.73	0.75	0.4
ARRDC4	ATP5A1	20|15	35	17.5	2	16|54|51|33|13|37|51|37|15	0	-179.25	0.34	0.69
ARRDC4	H1FX	1|1	2	1	2	1|0|0|3|1|1|3|0|0	0	-7.6	0.43	0.69
ARRDC4	DNAJB6	4|5	9	4.5	2	1|1|1|2|2|6|6|5|1	0	-14.98	0.79	0.61
ARRDC4	CRYBG3	2|0	2	1	2	0|0|0|0|0|0|0|0|0	0.48	-1.13	10	0.18
ARRDC4	DNAJB4	3|0	3	1.5	2	0|0|0|0|0|0|0|0|0	0.5	-1.13	15	0.12
ARRDC4	FANCA	2|2	4	2	2	0|0|0|0|0|0|0|0|0	0.97	3.41	20	0.01
ARRDC4	TTC27	2|0	2	1	2	0|0|0|0|0|0|0|0|0	0.48	-1.13	10	0.18
ARRDC4	SUGP2	3|3	6	3	2	0|0|0|0|0|0|0|0|0	0.99	5.25	30	0
ARRDC4	H1F0	1|2	3	1.5	2	2|0|0|0|3|0|0|0|0	0.01	-5.14	0.9	0.43
ARRDC4	HNRNPA0	2|1	3	1.5	2	0|2|3|2|4|0|1|2|4	0	-12.93	0.41	0.69
ARRDC4	HNRNPA1	0|3	3	1.5	2	0|7|15|4|2|0|3|1|3	0	-37.18	0.17	0.69
ARRDC4	MRPS18B	3|0	3	1.5	2	0|0|0|0|0|0|0|0|0	0.5	-1.13	15	0.12
ARRDC4	ENO1	1|11	12	6	2	5|82|94|41|5|6|13|5|0	0	-316.35	0.08	0.69
ARRDC4	CLU	2|4	6	3	2	0|0|0|0|0|0|0|0|0	0.98	3.41	30	0
ARRDC4	CARF	2|0	2	1	2	0|0|0|0|0|0|0|0|0	0.48	-1.13	10	0.18
ARRDC4	IRS4	150|157	307	153.5	2	36|35|21|29|53|39|64|68|45	0.2	-9.16	2.49	0.33
ARRDC4	RNF149	5|2	7	3.5	2	0|0|0|0|0|0|0|0|0	0.98	3.41	35	0
ARRDC4	CDK1	16|11	27	13.5	2	9|14|6|9|10|6|9|9|5	0	-23.5	1.23	0.63
ARRDC4	CDK5	2|0	2	1	2	0|0|0|0|0|0|0|2|3	0.01	-7.05	0.6	0.43
ARRDC4	PTK7	4|6	10	5	2	0|0|0|0|0|0|0|0|0	1	6.99	50	0
ARRDC4	PHB2	6|6	12	6	2	4|14|12|7|3|7|11|7|7	0	-37.02	0.49	0.69
ARRDC4	SF3B1	2|1	3	1.5	2	0|0|2|6|0|2|5|4|0	0	-18.41	0.3	0.69
ARRDC4	MSH6	10|7	17	8.5	2	3|3|2|4|2|9|6|2|0	0	-12.86	1.34	0.56
ARRDC4	SF3B2	1|1	2	1	2	1|4|5|0|1|0|0|5|0	0	-17.06	0.21	0.69
ARRDC4	SUN2	2|6	8	4	2	2|3|2|5|6|6|13|7|6	0	-31.11	0.46	0.65
ARRDC4	ADCK4	8|10	18	9	2	4|6|4|6|5|5|5|5|0	0	-9.1	1.59	0.51
ARRDC4	ADCK3	5|5	10	5	2	2|0|0|2|0|2|5|0|0	0.02	-4.06	1.67	0.43
ARRDC4	DNAJC16	2|0	2	1	2	2|0|0|2|0|0|4|3|2	0	-12.67	0.33	0.55
ARRDC4	HSPD1	25|25	50	25	2	16|53|52|29|18|28|35|26|16	0	-134.09	0.54	0.69
ARRDC4	DNAJC10	2|0	2	1	2	0|0|0|0|0|0|0|0|0	0.48	-1.13	10	0.18
ARRDC4	ARHGDIA	0|2	2	1	2	0|3|7|3|0|1|1|0|0	0	-18.53	0.23	0.61
ARRDC4	EPRS	7|5	12	6	2	0|5|11|0|0|0|0|0|0	0	-11.51	1.12	0.56
ARRDC4	NFXL1	2|0	2	1	2	0|0|0|0|0|0|0|0|0	0.48	-1.13	10	0.18
ARRDC4	COPA	24|16	40	20	2	11|5|10|11|10|15|16|12|12	0	-28.01	1.4	0.63
ARRDC4	COPE	3|0	3	1.5	2	0|0|0|0|0|2|5|0|0	0.01	-9.51	0.64	0.46
ARRDC4	PRKCZ	0|2	2	1	2	0|0|0|0|0|0|0|0|0	0.48	-1.13	10	0.18
ARRDC4	SGSM3	3|2	5	2.5	2	0|0|0|0|0|0|0|0|0	0.98	3.41	25	0
ARRDC4	DDX21	2|4	6	3	2	1|7|7|5|4|1|3|0|0	0	-21.52	0.47	0.63
ARRDC4	DDX20	5|5	10	5	2	0|0|0|0|0|2|4|0|0	0.32	-0.77	2.5	0.3
ARRDC4	CLPTM1L	2|1	3	1.5	2	0|2|2|1|0|3|1|0|0	0	-7.6	0.64	0.51
ARRDC4	TYMS	1|1	2	1	2	0|2|2|3|0|0|0|0|0	0	-7.6	0.43	0.69
ARRDC4	VTI1A	1|2	3	1.5	2	0|0|0|0|0|0|0|0|0	0.48	1.38	15	0.18
ARRDC4	MUL1	2|0	2	1	2	0|0|0|0|0|0|0|0|0	0.48	-1.13	10	0.18
ARRDC4	SCIN	6|4	10	5	2	0|0|0|0|4|0|0|0|0	0.69	0.32	3.75	0.03
ARRDC4	ACTG1	70|57	127	63.5	2	28|43|81|40|56|14|22|16|41	0	-128.71	1.06	0.68
ARRDC4	ACTG2	0|16	16	8	2	0|0|0|12|0|5|6|4|12	0	-43.6	0.8	0.61
ARRDC4	RPN2	17|13	30	15	2	6|13|12|8|9|6|21|11|4	0	-35.85	0.98	0.66
ARRDC4	CHSY1	0|2	2	1	2	0|0|0|0|0|0|0|0|0	0.48	-1.13	10	0.18
ARRDC4	OCIAD2	1|1	2	1	2	0|0|0|0|0|0|0|0|0	0	1.38	10	0.69
ARRDC4	MAP3K6	0|2	2	1	2	0|0|0|0|0|0|0|0|0	0.48	-1.13	10	0.18
ARRDC4	MARCKS	0|3	3	1.5	2	0|6|9|12|0|1|3|0|0	0	-39.14	0.17	0.69
ARRDC4	HIST1H1C	3|6	9	4.5	2	2|4|5|7|5|4|5|3|3	0	-16.76	0.79	0.6
ARRDC4	NUP210	2|2	4	2	2	0|0|0|4|0|2|1|0|0	0	-6.03	0.86	0.49
ARRDC4	ERBB2	4|0	4	2	2	0|0|0|0|0|0|0|0|0	0.5	-1.13	20	0.09
ARRDC4	IARS	6|7	13	6.5	2	0|7|8|3|0|0|0|0|0	0	-13.16	1.08	0.59
ARRDC4	CTSA	1|1	2	1	2	1|0|0|0|2|0|0|0|0	0	-2.76	1	0.69
ARRDC4	PASK	2|1	3	1.5	2	0|0|0|0|0|0|0|0|0	0.48	1.38	15	0.18
ARRDC4	PPP1R35	3|1	4	2	2	0|0|0|0|0|0|0|0|0	0.5	1.38	20	0.12
ARRDC4	RPL17	3|3	6	3	2	2|5|5|8|5|5|11|3|2	0	-26.07	0.38	0.69
ARRDC4	RPL10	7|5	12	6	2	6|5|7|2|12|2|7|2|5	0	-24.6	0.69	0.65
ARRDC4	RPL12	2|0	2	1	2	2|3|4|6|4|6|9|2|2	0	-30.26	0.14	0.69
ARRDC4	RPL13	4|5	9	4.5	2	7|9|11|13|7|11|15|4|5	0	-44.24	0.35	0.69
ARRDC4	FGFR4	1|4	5	2.5	2	0|0|0|0|0|0|0|0|0	0.5	1.38	25	0.09
ARRDC4	RPL18	0|2	2	1	2	2|4|7|5|2|1|0|0|0	0	-22.92	0.19	0.69
ARRDC4	FGFR1	2|0	2	1	2	0|0|0|0|0|0|0|0|0	0.48	-1.13	10	0.18
ARRDC4	NME1	12|10	22	11	2	0|15|11|5|0|2|0|2|0	0	-22.27	1.06	0.64
ARRDC4	NME2	6|0	6	3	2	0|10|9|2|0|1|4|1|0	0	-33.21	0.39	0.64
ARRDC4	NME3	5|3	8	4	2	1|0|0|1|1|1|3|0|0	0.35	-2.23	2.4	0.3
ARRDC4	RAI14	2|6	8	4	2	0|0|0|0|5|0|0|0|0	0.39	-2.89	2.4	0.3
ARRDC4	FREM2	1|3	4	2	2	0|0|0|0|0|0|0|0|0	0.5	1.38	20	0.12
ARRDC4	EMD	15|16	31	15.5	2	4|7|4|11|3|14|18|21|7	0	-41.32	0.88	0.67
ARRDC4	HGH1	3|2	5	2.5	2	0|0|0|0|0|0|0|0|0	0.98	3.41	25	0
ARRDC4	HELZ	8|6	14	7	2	8|13|5|16|5|30|45|29|11	0	-130.53	0.2	0.69
ARRDC4	MATR3	5|0	5	2.5	2	0|6|4|0|4|0|4|7|8	0	-30.26	0.36	0.64
ARRDC4	MYADM	1|2	3	1.5	2	0|0|0|0|0|0|0|0|0	0.48	1.38	15	0.18
ARRDC4	PYCR1	3|0	3	1.5	2	0|0|0|0|0|0|0|0|0	0.5	-1.13	15	0.12
ARRDC4	PCNXL3	0|3	3	1.5	2	0|0|0|0|0|0|0|0|0	0.5	-1.13	15	0.12
ARRDC4	AHNAK	9|6	15	7.5	2	0|3|83|14|2|0|0|0|0	0	-123.19	0.22	0.69
ARRDC4	PNPLA6	8|6	14	7	2	0|0|0|0|0|3|6|0|0	0.2	-2.58	2.33	0.33
ARRDC4	UNC5B	2|2	4	2	2	0|0|0|0|0|0|0|0|0	0.97	3.41	20	0.01
ARRDC4	PHKA1	1|2	3	1.5	2	0|0|0|0|0|0|0|0|0	0.48	1.38	15	0.18
ARRDC4	SFPQ	3|3	6	3	2	0|7|6|6|6|7|6|5|3	0	-20.69	0.45	0.69
ARRDC4	TP53	3|2	5	2.5	2	0|0|0|0|0|0|0|0|0	0.98	3.41	25	0
ARRDC4	NAA10	3|2	5	2.5	2	0|0|0|0|0|0|3|0|0	0.43	-0.8	2.5	0.29
ARRDC4	MOGS	5|3	8	4	2	1|6|1|4|3|6|8|7|4	0	-21.99	0.57	0.64
ARRDC4	UBE2S	2|3	5	2.5	2	0|0|0|0|0|0|0|0|0	0.98	3.41	25	0
ARRDC4	AMOT	2|2	4	2	2	0|0|0|0|4|0|0|0|0	0.14	-1.79	1.5	0.35
ARRDC4	ASNA1	7|5	12	6	2	0|0|0|0|0|0|0|0|0	1	8.67	60	0
ARRDC4	CLPX	6|3	9	4.5	2	4|0|2|2|3|2|3|0|2	0.01	-8.09	1.35	0.45
ARRDC4	KRT2	18|18	36	18	2	38|69|164|21|43|185|73|141|79	0	-651.12	0.11	0.69
ARRDC4	KRT1	35|33	68	34	2	59|82|344|76|87|166|73|154|180	0	#NAME?	0.15	0.69
ARRDC4	RPS10	5|6	11	5.5	2	2|7|11|5|7|4|12|5|3	0	-29.8	0.55	0.69
ARRDC4	KRT5	0|10	10	5	2	17|19|137|15|24|44|22|42|49	0	-340.91	0.07	0.69
ARRDC4	KRT9	20|19	39	19.5	2	34|72|125|41|67|54|22|90|123	0	-426.71	0.17	0.69
ARRDC4	KRT8	223|213	436	218	2	74|67|36|232|122|347|461|109|194	0	#NAME?	0.63	0.69
ARRDC4	NLRX1	4|3	7	3.5	2	0|2|3|3|0|4|6|4|0	0	-12.94	0.75	0.59
ARRDC4	FOXG1	4|2	6	3	2	4|0|0|2|8|0|6|4|8	0	-25.66	0.41	0.65
ARRDC4	EPB41L3	8|8	16	8	2	2|3|2|4|4|0|0|0|0	0.09	-2.28	2.18	0.37
ARRDC4	NDUFA5	1|1	2	1	2	2|3|2|1|2|2|2|2|1	0	-7.6	0.43	0.69
ARRDC4	EPB41L5	11|11	22	11	2	11|8|0|0|10|0|0|6|0	0	-18.81	1.14	0.64
ARRDC4	KIDINS220	10|5	15	7.5	2	0|4|0|0|0|2|7|4|0	0.01	-11.06	1.5	0.46
ARRDC4	NDUFA9	16|8	24	12	2	3|14|10|8|4|11|24|16|6	0	-55.36	0.67	0.67
ARRDC4	VPS4A	1|2	3	1.5	2	2|0|0|2|0|1|1|0|0	0.01	-5.16	0.9	0.44
ARRDC4	QARS	3|6	9	4.5	2	0|5|7|7|0|0|2|0|0	0	-19.36	0.71	0.62
ARRDC4	FAM171A2	3|0	3	1.5	2	0|0|0|0|0|0|0|0|0	0.5	-1.13	15	0.12
ARRDC4	ADAM28	3|0	3	1.5	2	3|0|0|0|1|0|0|0|0	0.14	-5.53	1.12	0.35
ARRDC4	GALK1	0|2	2	1	2	0|0|0|0|0|0|0|0|0	0.48	-1.13	10	0.18
ARRDC4	AIF1L	0|3	3	1.5	2	0|0|0|0|0|0|0|0|0	0.5	-1.13	15	0.12
ARRDC4	TBL1XR1	1|2	3	1.5	2	0|0|0|0|0|2|6|0|0	0	-8.55	0.56	0.52
ARRDC4	STX10	3|3	6	3	2	0|0|0|0|0|0|0|0|0	0.99	5.25	30	0
ARRDC4	FARSA	8|6	14	7	2	3|2|1|3|2|6|5|1|1	0	-8.44	1.5	0.5
ARRDC4	STX17	3|4	7	3.5	2	0|0|0|0|0|2|3|0|0	0.2	-2.17	2.1	0.33
ARRDC4	EFHD1	3|5	8	4	2	2|0|0|0|5|0|0|0|0	0.09	-4.12	1.71	0.37
ARRDC4	MIC13	5|0	5	2.5	2	1|0|2|0|2|0|7|1|1	0	-15.4	0.68	0.51
ARRDC4	NYNRIN	4|4	8	4	2	0|0|0|3|0|7|11|0|0	0	-19.7	0.57	0.64
ARRDC4	BIRC2	6|4	10	5	2	5|0|0|0|1|2|2|0|0	0.03	-5.46	1.67	0.41
ARRDC4	INSR	5|6	11	5.5	2	0|0|0|0|0|0|0|0|0	1	8.67	55	0
ARRDC4	HIST2H2BF	5|5	10	5	2	2|1|8|2|7|1|3|0|0	0	-14.6	0.83	0.61
ARRDC4	HIST2H2BE	0|7	7	3.5	2	0|0|13|2|11|1|5|0|0	0	-41.96	0.36	0.65
ARRDC4	ANKRD17	2|0	2	1	2	0|8|4|6|0|11|12|13|0	0	-52.5	0.08	0.69
ARRDC4	SPTBN1	16|20	36	18	2	4|10|7|6|13|0|0|0|1	0	-12.95	1.8	0.54
ARRDC4	PAN3	3|0	3	1.5	2	0|0|0|0|0|0|3|0|0	0.28	-3.72	1.5	0.31
ARRDC4	ARPC4-TTLL3	1|2	3	1.5	2	0|0|0|0|0|0|0|0|0	0.48	1.38	15	0.18
ARRDC4	TMEM33	4|4	8	4	2	1|4|2|4|2|5|4|6|4	0	-12.5	0.8	0.6
ARRDC4	MSI2	4|5	9	4.5	2	0|2|0|3|0|5|6|2|0	0	-11.35	0.96	0.57
ARRDC4	MSI1	4|2	6	3	2	0|2|0|0|0|5|4|4|0	0	-13.47	0.69	0.58
ARRDC4	MCM7	0|2	2	1	2	0|1|1|0|0|1|5|2|0	0	-11.22	0.38	0.53
ARRDC4	MCM3	5|6	11	5.5	2	3|5|1|8|0|3|2|1|0	0	-12.26	1.03	0.58
ARRDC4	SQSTM1	2|1	3	1.5	2	1|3|2|2|1|6|7|3|3	0	-19.85	0.28	0.69
ARRDC4	RPA1	1|1	2	1	2	1|0|0|6|2|0|5|0|0	0	-15.66	0.23	0.69
ARRDC4	NDUFS1	5|4	9	4.5	2	0|8|10|3|0|0|5|3|0	0	-22.63	0.59	0.64
ARRDC4	NDUFS2	11|8	19	9.5	2	10|8|7|5|8|6|12|18|7	0	-36.99	0.71	0.66
ARRDC4	NDUFS3	10|10	20	10	2	6|18|10|7|8|8|17|13|6	0	-43.57	0.62	0.69
ARRDC4	NDUFS7	4|2	6	3	2	2|3|1|2|3|3|3|5|3	0	-10.91	0.82	0.54
ARRDC4	NDUFS8	1|2	3	1.5	2	1|4|0|0|3|2|3|2|1	0	-11.56	0.45	0.57
ARRDC4	ILF3	2|8	10	5	2	3|0|8|11|6|8|11|0|3	0	-36.86	0.5	0.65
ARRDC4	ILF2	4|6	10	5	2	0|7|11|10|9|12|11|4|3	0	-37.37	0.44	0.69
ARRDC4	PCDHGB5	3|5	8	4	2	0|0|0|0|0|0|0|0|0	1	5.25	40	0
ARRDC4	PSMC2	20|17	37	18.5	2	0|6|9|3|0|0|2|0|0	0.82	0.66	3.08	0.02
ARRDC4	CXorf57	2|2	4	2	2	0|0|0|0|0|0|0|0|0	0.97	3.41	20	0.01
ARRDC4	DSC2	7|7	14	7	2	0|0|14|0|0|0|0|0|0	0	-5.92	1.5	0.49
ARRDC4	DSC3	4|2	6	3	2	0|0|8|0|0|0|0|0|0	0.02	-6.5	1.12	0.43
ARRDC4	GOT2	0|2	2	1	2	0|6|6|8|0|0|0|0|0	0	-28.82	0.15	0.69
ARRDC4	DDX3X	11|8	19	9.5	2	7|12|12|6|9|8|7|4|24	0	-47.03	0.59	0.67
ARRDC4	VWA8	23|20	43	21.5	2	17|22|0|14|10|24|52|26|21	0	-93.58	0.63	0.68
ARRDC4	RANGAP1	4|3	7	3.5	2	2|7|5|7|2|5|8|9|2	0	-26.02	0.44	0.69
ARRDC4	BRAT1	0|4	4	2	2	0|0|0|0|0|0|0|0|0	0.5	-1.13	20	0.09
ARRDC4	H2AFV	5|5	10	5	2	4|2|6|0|5|0|3|0|0	0	-11.06	1	0.58
ARRDC4	ROBO1	1|1	2	1	2	0|0|0|0|0|0|0|0|0	0	1.38	10	0.69
ARRDC4	VPS13A	2|0	2	1	2	0|0|0|0|0|0|0|0|0	0.48	-1.13	10	0.18
ARRDC4	H2AFX	6|7	13	6.5	2	0|0|17|0|10|0|6|0|0	0	-31.34	0.59	0.66
ARRDC4	CCDC86	0|4	4	2	2	0|0|0|0|3|0|0|0|0	0.36	-3.72	2	0.3
ARRDC4	H2AFZ	2|2	4	2	2	1|2|6|0|2|0|3|0|0	0	-10.93	0.55	0.58
ARRDC4	DDX5	9|5	14	7	2	5|8|16|8|4|8|7|7|14	0	-40.48	0.55	0.67
ARRDC4	DDX6	0|2	2	1	2	0|8|4|1|0|3|2|5|5	0	-25.84	0.17	0.69
ARRDC4	NUP205	16|14	30	15	2	5|5|0|12|7|16|16|5|0	0	-32.08	1.02	0.66
ARRDC4	NCAPG2	6|2	8	4	2	0|0|0|0|0|0|0|0|0	0.98	3.41	40	0
ARRDC4	HLA-C	0|8	8	4	2	6|10|11|11|5|10|14|15|8	0	-58.46	0.3	0.69
ARRDC4	HLA-A	9|9	18	9	2	0|7|7|0|0|0|0|0|0	0.01	-4.36	1.93	0.44
ARRDC4	CLTC	9|7	16	8	2	2|26|38|13|5|2|7|2|0	0	-88.8	0.31	0.69
ARRDC4	HAUS8	2|3	5	2.5	2	0|0|0|1|0|0|6|0|0	0.01	-5.46	1.07	0.44
ARRDC4	HAUS6	1|2	3	1.5	2	0|0|0|0|0|0|3|0|0	0.15	-2.32	1.5	0.34
ARRDC4	HAUS7	2|2	4	2	2	0|0|0|0|0|0|0|0|0	0.97	3.41	20	0.01
ARRDC4	HAUS5	1|3	4	2	2	2|0|0|0|0|0|0|0|0	0.36	-1.26	3	0.3
ARRDC4	NACA	1|1	2	1	2	3|8|9|9|2|3|3|2|0	0	-34.12	0.12	0.69
ARRDC4	KIAA0368	2|1	3	1.5	2	0|0|0|0|0|0|0|0|0	0.48	1.38	15	0.18
ARRDC4	FAF2	1|1	2	1	2	0|3|0|2|0|0|3|2|1	0	-8.93	0.38	0.69
ARRDC4	HIST1H2BD	3|2	5	2.5	2	1|0|4|0|4|0|0|0|0	0	-8.34	0.83	0.52
ARRDC4	HIST1H2BB	0|7	7	3.5	2	0|0|13|2|11|1|5|0|0	0	-41.96	0.36	0.65
ARRDC4	HIST1H2BC	5|5	10	5	2	2|1|8|2|7|1|3|0|0	0	-14.6	0.83	0.61
ARRDC4	HIST1H2BL	3|2	5	2.5	2	1|0|4|0|4|0|0|0|0	0	-8.34	0.83	0.52
ARRDC4	HIST1H2BM	3|2	5	2.5	2	1|0|4|0|4|0|0|0|0	0	-8.34	0.83	0.52
ARRDC4	MTFR2	4|4	8	4	2	3|2|0|5|4|8|9|4|1	0	-21.32	0.55	0.69
ARRDC4	HIST1H2BO	0|7	7	3.5	2	0|0|13|2|11|1|5|0|0	0	-41.96	0.36	0.65
ARRDC4	HIST1H2BH	3|2	5	2.5	2	1|0|4|0|4|0|0|0|0	0	-8.34	0.83	0.52
ARRDC4	HIST1H2BJ	0|7	7	3.5	2	0|0|13|2|11|1|5|0|0	0	-41.96	0.36	0.65
ARRDC4	HIST1H2BK	3|2	5	2.5	2	1|0|4|0|4|0|0|0|0	0	-8.34	0.83	0.52
ARRDC4	SLC25A40	1|1	2	1	2	0|0|0|0|0|0|3|0|0	0	-2.32	1	0.69
ARRDC4	SSSCA1	4|3	7	3.5	2	0|0|0|0|0|0|0|0|0	1	5.25	35	0
ARRDC4	RBPMS	2|2	4	2	2	0|7|4|4|0|4|13|5|0	0	-29.59	0.24	0.69
ARRDC4	NUP153	4|5	9	4.5	2	7|1|0|3|9|8|11|4|19	0	-43.96	0.35	0.69
ARRDC4	HTT	1|2	3	1.5	2	0|0|0|0|0|0|0|0|0	0.48	1.38	15	0.18
ARRDC4	STON2	2|3	5	2.5	2	2|0|0|0|6|0|0|0|0	0	-6.84	0.94	0.48
ARRDC4	NUP155	2|2	4	2	2	0|3|1|0|0|3|3|4|0	0	-9.63	0.6	0.56
ARRDC4	IPO7	10|8	18	9	2	0|3|2|3|0|2|4|0|0	0.51	-1.19	2.7	0.06
ARRDC4	IPO5	3|2	5	2.5	2	0|5|5|3|0|1|1|0|0	0	-13.47	0.58	0.59
ARRDC4	ACTR3	4|0	4	2	2	0|2|6|0|0|0|0|0|0	0.01	-10.93	0.75	0.45
ARRDC4	ACTR2	6|2	8	4	2	0|0|7|2|0|1|3|1|0	0	-11.96	1	0.5
ARRDC4	NRBP1	2|0	2	1	2	0|0|0|0|0|0|0|0|0	0.48	-1.13	10	0.18
ARRDC4	NAP1L1	3|4	7	3.5	2	3|7|5|3|0|0|3|1|0	0	-14.15	0.7	0.6
ARRDC4	ENSG00000258674	2|1	3	1.5	2	1|0|0|0|1|0|0|0|0	0.23	-1.56	2.25	0.32
ARRDC4	SDCBP	5|3	8	4	2	0|4|2|0|0|0|0|2|0	0.03	-5.73	1.5	0.41
ARRDC4	TNPO1	3|4	7	3.5	2	1|3|3|3|1|0|2|0|0	0	-6.91	1.17	0.49
ARRDC4	POLDIP3	5|9	14	7	2	12|18|9|45|10|6|22|13|36	0	-131.98	0.2	0.69
ARRDC4	POLDIP2	5|4	9	4.5	2	5|4|0|3|4|3|3|2|4	0	-10.17	1.04	0.56
ARRDC4	TECR	8|8	16	8	2	4|10|7|3|5|4|9|11|7	0	-24.42	0.8	0.65
ARRDC4	PPP1R12A	2|1	3	1.5	2	0|0|0|0|0|0|0|0|0	0.48	1.38	15	0.18
ARRDC4	ALDH18A1	0|2	2	1	2	0|4|3|47|0|46|105|3|1	0	-293.33	0.02	0.69
ARRDC4	NKD2	2|2	4	2	2	0|0|0|0|0|0|0|0|0	0.97	3.41	20	0.01
ARRDC4	FADS1	1|2	3	1.5	2	0|0|0|0|0|0|0|0|0	0.48	1.38	15	0.18
ARRDC4	CYP4A11	3|4	7	3.5	2	0|0|3|4|0|0|2|3|5	0	-10.42	0.88	0.56
ARRDC4	MMTAG2	2|3	5	2.5	2	6|3|0|3|3|1|0|7|5	0	-20.13	0.42	0.69
ARRDC4	FADS2	3|2	5	2.5	2	1|2|0|0|1|0|0|2|0	0.06	-3.65	1.5	0.38
ARRDC4	VPS39	4|7	11	5.5	2	5|0|0|0|3|0|0|0|0	0.18	-3.98	2.06	0.33
ARRDC4	WDR92	2|1	3	1.5	2	0|0|0|0|0|0|0|0|0	0.48	1.38	15	0.18
ARRDC4	SYNGR3	1|1	2	1	2	0|0|0|1|0|1|1|0|0	0	-2.76	1	0.69
ARRDC4	GLB1	7|6	13	6.5	2	5|0|0|4|8|0|1|0|4	0	-11.96	1.15	0.58
ARRDC4	CSE1L	7|8	15	7.5	2	0|9|7|6|0|4|6|0|0	0	-16.39	1.02	0.62
ARRDC4	FBL	15|10	25	12.5	2	0|3|5|2|4|4|5|7|5	0.27	-6.34	2.21	0.31
ARRDC4	NUMA1	4|2	6	3	2	0|0|0|0|0|0|0|0|0	0.98	3.41	30	0
ARRDC4	NDUFA4	2|4	6	3	2	1|2|0|2|1|2|2|2|2	0.06	-4.84	1.5	0.38
ARRDC4	HSPA1B	157|141	298	149	2	24|55|59|45|23|45|63|49|35	0.5	-11.97	2.53	0.09
ARRDC4	HSPA1A	78|70	148	74	2	12|28|30|23|11|22|32|24|17	0.41	-8.53	2.47	0.29
ARRDC4	EPB41L2	1|1	2	1	2	0|0|0|0|0|0|0|0|0	0	1.38	10	0.69
ARRDC4	IKBKAP	17|7	24	12	2	0|0|0|5|0|0|5|0|0	0.53	-2.57	3.6	0.05
ARRDC4	ADAM15	1|3	4	2	2	0|0|0|0|0|0|0|0|0	0.5	1.38	20	0.12
ARRDC4	FAM83B	13|12	25	12.5	2	9|13|2|10|23|18|40|11|39	0	-111.33	0.37	0.69
ARRDC4	IDH3B	2|2	4	2	2	4|3|1|0|0|0|0|3|0	0	-9.63	0.6	0.56
ARRDC4	HAGH	2|0	2	1	2	0|0|0|0|0|0|0|0|0	0.48	-1.13	10	0.18
ARRDC4	PLOD1	4|1	5	2.5	2	0|2|0|0|0|0|3|2|0	0.02	-7.6	1.07	0.42
ARRDC4	SLC38A10	2|3	5	2.5	2	0|0|0|0|0|0|0|0|0	0.98	3.41	25	0
ARRDC4	FOXRED1	7|3	10	5	2	2|0|1|2|2|5|10|4|4	0	-19.23	0.79	0.6
ARRDC4	DGKE	1|2	3	1.5	2	0|5|3|1|0|0|4|5|2	0	-17.06	0.32	0.69
ARRDC4	UFL1	0|3	3	1.5	2	0|0|3|1|0|2|0|2|0	0.01	-9.85	0.64	0.47
ARRDC4	TMEM106C	2|0	2	1	2	0|0|0|0|0|0|0|0|0	0.48	-1.13	10	0.18
ARRDC4	CNP	10|9	19	9.5	2	8|5|4|4|5|8|13|8|3	0	-21.71	0.98	0.64
ARRDC4	USP11	2|2	4	2	2	0|0|0|0|0|0|3|0|0	0.31	-0.8	2	0.3
ARRDC4	SNRPN	2|2	4	2	2	1|2|3|2|2|1|2|1|0	0	-6.03	0.86	0.49
ARRDC4	SNRPB	3|2	5	2.5	2	2|3|4|2|3|1|3|2|2	0	-9.63	0.75	0.55
ARRDC4	NPM1	1|2	3	1.5	2	0|26|34|0|2|0|0|0|0	0	-85.64	0.07	0.69
ARRDC4	SNRPE	3|0	3	1.5	2	0|0|0|2|2|0|2|0|0	0.02	-8.36	0.75	0.43
ARRDC4	HSPA13	0|2	2	1	2	0|0|0|0|0|0|0|0|0	0.48	-1.13	10	0.18
ARRDC4	UNC45A	5|4	9	4.5	2	0|4|5|9|0|2|7|0|0	0	-20	0.64	0.64
ARRDC4	HADHB	3|6	9	4.5	2	0|2|7|3|0|0|0|0|0	0	-10.25	1.12	0.5
ARRDC4	ZDHHC17	0|2	2	1	2	0|0|0|0|0|0|0|0|0	0.48	-1.13	10	0.18
ARRDC4	ZDHHC13	6|5	11	5.5	2	0|0|0|0|0|0|0|0|0	1	8.67	55	0
ARRDC4	IQCB1	1|1	2	1	2	0|0|0|0|0|0|0|0|0	0	1.38	10	0.69
ARRDC4	PCSK6	2|0	2	1	2	0|0|0|0|0|0|0|0|0	0.48	-1.13	10	0.18
ARRDC4	P4HA1	2|2	4	2	2	3|1|0|3|2|3|8|1|2	0	-14.65	0.43	0.69
ARRDC4	UBAC2	6|5	11	5.5	2	2|4|2|2|0|4|6|2|0	0	-9.88	1.18	0.55
ARRDC4	TYK2	3|3	6	3	2	0|0|0|0|0|0|0|0|0	0.99	5.25	30	0
ARRDC4	SQRDL	8|10	18	9	2	5|0|0|0|2|0|0|0|0	0.79	0.84	3.86	0.02
ARRDC4	ALMS1	2|1	3	1.5	2	0|0|0|0|0|0|0|0|0	0.48	1.38	15	0.18
ARRDC4	MRPL50	0|3	3	1.5	2	3|0|0|0|1|0|5|0|0	0	-12.63	0.5	0.52
ARRDC4	PRIM2	2|0	2	1	2	0|0|0|0|0|0|0|0|0	0.48	-1.13	10	0.18
ARRDC4	KCT2	2|1	3	1.5	2	0|0|0|0|0|0|0|0|0	0.48	1.38	15	0.18
ARRDC4	MUC19	0|9	9	4.5	2	2|2|4|2|0|3|3|0|0	0.26	-14.17	1.35	0.32
ARRDC4	DDX41	40|34	74	37	2	31|34|19|37|37|45|75|40|27	0	-142.09	0.69	0.69
ARRDC4	AHR	3|4	7	3.5	2	0|0|0|0|0|0|0|0|0	1	5.25	35	0
ARRDC4	RHBDD2	2|1	3	1.5	2	0|0|0|0|0|0|0|0|0	0.48	1.38	15	0.18
ARRDC4	CEP78	2|2	4	2	2	0|0|0|0|0|0|0|0|0	0.97	3.41	20	0.01
ARRDC4	LCHN	1|1	2	1	2	0|0|0|0|0|0|0|0|0	0	1.38	10	0.69
ARRDC4	ACTA2	0|16	16	8	2	0|0|0|12|0|5|6|4|12	0	-43.6	0.8	0.61
ARRDC4	LGR4	5|3	8	4	2	0|0|0|0|0|0|0|0|0	1	5.25	40	0
ARRDC4	ACTA1	43|16	59	29.5	2	0|24|47|12|32|5|6|4|12	0	-103.38	0.86	0.68
ARRDC4	ELAVL1	1|1	2	1	2	0|3|3|3|0|1|8|1|1	0	-16.91	0.21	0.69
ARRDC4	CHCHD3	3|3	6	3	2	3|2|2|4|3|4|6|2|1	0	-12.94	0.64	0.69
ARRDC4	RPL7A	0|3	3	1.5	2	3|11|13|5|2|0|12|1|0	0	-52.5	0.12	0.69
ARRDC4	CHCHD4	1|1	2	1	2	0|0|0|0|0|0|0|0|0	0	1.38	10	0.69
ARRDC4	TIMM23B	0|2	2	1	2	1|0|1|0|2|2|2|3|1	0	-9.85	0.43	0.51
ARRDC4	TMEM127	3|0	3	1.5	2	0|0|0|0|0|0|0|0|0	0.5	-1.13	15	0.12
ARRDC4	TSPYL1	1|2	3	1.5	2	1|0|0|1|1|2|0|0|0	0.04	-3.96	1.12	0.4
ARRDC4	NCAPD2	3|0	3	1.5	2	0|0|0|0|0|0|0|0|0	0.5	-1.13	15	0.12
ARRDC4	NCAPD3	7|5	12	6	2	0|0|0|0|0|0|0|0|0	1	8.67	60	0
ARRDC4	TCAF1	1|4	5	2.5	2	0|0|0|0|0|0|0|0|0	0.5	1.38	25	0.09
ARRDC4	PSIP1	2|5	7	3.5	2	0|0|0|0|3|0|0|0|0	0.56	-0.8	3.5	0.05
ARRDC4	FLOT1	6|7	13	6.5	2	6|17|4|14|23|19|16|15|31	0	-86.52	0.27	0.69
ARRDC4	FLOT2	3|5	8	4	2	5|16|1|9|27|13|9|13|22	0	-84	0.18	0.69
ARRDC4	MYH10	7|6	13	6.5	2	1|11|19|0|5|0|0|0|0	0	-33.81	0.56	0.66
ARRDC4	MYH14	4|4	8	4	2	0|0|18|0|0|0|0|0|0	0	-14.85	0.67	0.62
ARRDC4	KIAA0355	3|0	3	1.5	2	2|2|2|1|0|1|3|5|0	0	-14.17	0.45	0.55
ARRDC4	PELP1	2|2	4	2	2	0|0|0|0|0|0|0|0|0	0.97	3.41	20	0.01
ARRDC4	AKAP10	3|0	3	1.5	2	0|0|0|0|0|0|3|0|0	0.28	-3.72	1.5	0.31
ARRDC4	TSC2	11|5	16	8	2	0|0|0|0|0|0|0|0|0	1	8.67	80	0
ARRDC4	SKIDA1	0|2	2	1	2	0|0|0|0|0|0|0|0|0	0.48	-1.13	10	0.18
ARRDC4	SMC3	1|2	3	1.5	2	0|0|0|0|0|0|0|0|0	0.48	1.38	15	0.18
ARRDC4	NEDD4	8|5	13	6.5	2	0|0|0|0|0|0|0|0|0	1	8.67	65	0
ARRDC4	ENSG00000258465	1|1	2	1	2	0|0|0|0|0|0|0|0|0	0	1.38	10	0.69
ARRDC4	CDC37	5|3	8	4	2	0|1|5|3|0|0|0|0|0	0.01	-6.87	1.33	0.45
ARRDC4	C17orf80	4|0	4	2	2	0|0|0|0|0|0|0|0|0	0.5	-1.13	20	0.09
ARRDC4	AIP	1|1	2	1	2	0|0|0|0|0|0|0|0|0	0	1.38	10	0.69
ARRDC4	TMEM63B	2|0	2	1	2	0|0|0|0|0|0|0|0|0	0.48	-1.13	10	0.18
ARRDC4	RPL23A	2|2	4	2	2	3|7|6|11|3|3|13|2|2	0	-38.3	0.19	0.69
ARRDC4	EGFR	6|5	11	5.5	2	0|0|0|0|0|0|0|0|0	1	8.67	55	0
ARRDC4	IGF1R	2|2	4	2	2	0|0|0|0|0|0|0|0|0	0.97	3.41	20	0.01
ARRDC4	WDR81	4|0	4	2	2	0|0|0|0|0|0|0|0|0	0.5	-1.13	20	0.09
ARRDC4	NDE1	0|6	6	3	2	0|0|1|4|0|4|7|0|3	0	-21.43	0.6	0.57
ARRDC4	PFN1	0|3	3	1.5	2	0|12|19|13|0|0|3|0|0	0	-64.41	0.1	0.69
ARRDC4	NUDC	2|3	5	2.5	2	0|2|3|0|0|0|0|0|0	0.06	-3.58	1.5	0.38
ARRDC4	ESYT2	6|7	13	6.5	2	5|2|1|0|2|2|1|4|0	0.02	-4.97	1.77	0.43
ARRDC4	DYM	3|0	3	1.5	2	0|0|0|0|0|0|0|0|0	0.5	-1.13	15	0.12
ARRDC4	CBWD2	3|1	4	2	2	0|0|0|0|0|1|4|0|0	0.07	-4.98	1.2	0.38
ARRDC4	C1orf115	1|2	3	1.5	2	0|0|0|0|0|0|0|0|0	0.48	1.38	15	0.18
ARRDC4	LGALS3BP	13|12	25	12.5	2	5|14|6|9|6|14|23|15|12	0	-45	0.72	0.67
ARRDC4	MRS2	0|3	3	1.5	2	0|0|0|0|0|0|0|0|0	0.5	-1.13	15	0.12
ARRDC4	NRP1	3|1	4	2	2	0|0|0|0|0|0|0|4|0	0.18	-3.51	1.5	0.33
ARRDC4	DMXL1	2|0	2	1	2	0|0|0|0|0|0|0|0|0	0.48	-1.13	10	0.18
ARRDC4	EXOC7	2|2	4	2	2	0|0|0|0|0|0|0|0|0	0.97	3.41	20	0.01
ARRDC4	EXOC4	5|4	9	4.5	2	0|0|0|0|0|0|0|0|0	1	6.99	45	0
ARRDC4	OGT	2|0	2	1	2	0|4|0|5|0|3|4|1|0	0	-18.53	0.23	0.61
ARRDC4	CEPT1	3|3	6	3	2	0|0|0|0|2|0|0|0|0	0.71	0.92	4.5	0.03
ARRDC4	EEF2	26|27	53	26.5	2	3|48|56|13|2|2|4|3|0	0	-101.36	0.68	0.68
ARRDC4	ATP5J2	0|3	3	1.5	2	0|1|2|0|0|0|0|3|0	0.02	-8.36	0.75	0.43
ARRDC4	PYCR2	9|6	15	7.5	2	3|0|0|0|3|0|5|0|0	0.14	-4.97	2.05	0.35
ARRDC4	FBLN1	2|1	3	1.5	2	0|0|0|0|0|0|0|0|0	0.48	1.38	15	0.18
ARRDC4	DDX39B	2|5	7	3.5	2	0|4|8|6|0|2|1|0|0	0	-20.13	0.58	0.62
ARRDC4	SYNJ2BP	2|1	3	1.5	2	0|0|0|0|0|0|0|0|0	0.48	1.38	15	0.18
ARRDC4	ARHGEF2	2|0	2	1	2	2|0|0|0|2|0|0|0|4	0	-11.31	0.38	0.53
ARRDC4	GNG12	1|2	3	1.5	2	0|0|0|0|0|0|0|0|0	0.48	1.38	15	0.18
ARRDC4	STRAP	6|6	12	6	2	4|6|8|5|3|4|4|0|2	0	-14.31	0.95	0.61
ARRDC4	CDH2	3|2	5	2.5	2	0|0|0|0|0|0|0|0|0	0.98	3.41	25	0
ARRDC4	EIF2B4	3|4	7	3.5	2	0|0|0|0|0|0|0|0|0	1	5.25	35	0
ARRDC4	EIF2B5	3|1	4	2	2	0|0|0|0|0|0|0|0|0	0.5	1.38	20	0.12
ARRDC4	SIMC1	0|2	2	1	2	0|0|0|0|0|0|0|0|0	0.48	-1.13	10	0.18
ARRDC4	SCD5	1|1	2	1	2	0|0|0|0|0|0|0|0|0	0	1.38	10	0.69
ARRDC4	PALM	1|2	3	1.5	2	0|0|0|0|0|0|0|0|0	0.48	1.38	15	0.18
ARRDC4	CENPV	2|2	4	2	2	0|0|0|3|0|0|1|0|0	0.09	-2.27	1.5	0.37
ARRDC4	PDXDC1	4|2	6	3	2	2|0|0|0|0|0|0|0|0	0.68	0.04	4.5	0.03
ARRDC4	PYCRL	2|1	3	1.5	2	0|0|0|0|0|0|0|0|0	0.48	1.38	15	0.18
ARRDC4	ENSG00000262660	6|5	11	5.5	2	0|4|6|2|2|2|4|2|0	0	-9.88	1.18	0.55
ARRDC4	PLEKHA1	1|1	2	1	2	0|0|0|0|0|0|0|0|0	0	1.38	10	0.69
ARRDC4	ACTB	70|57	127	63.5	2	28|43|81|40|56|14|22|16|41	0	-128.71	1.06	0.68
ARRDC4	NETO2	2|2	4	2	2	0|0|0|0|0|0|0|0|0	0.97	3.41	20	0.01
ARRDC4	POM121C	2|2	4	2	2	1|2|4|0|4|2|2|3|2	0	-10.91	0.55	0.69
ARRDC4	MIB1	4|3	7	3.5	2	0|0|0|0|2|0|0|0|0	0.78	0.92	5.25	0.02
ARRDC4	ATP7A	4|3	7	3.5	2	0|0|0|0|0|0|0|0|0	1	5.25	35	0
ARRDC4	ATP7B	1|1	2	1	2	0|0|0|0|0|0|0|0|0	0	1.38	10	0.69
ARRDC4	RUVBL1	19|13	32	16	2	7|10|11|12|10|16|21|5|9	0	-39.63	0.98	0.66
ARRDC4	RUVBL2	23|16	39	19.5	2	8|10|4|14|6|10|19|5|7	0	-27.94	1.36	0.64
ARRDC4	DDX50	0|3	3	1.5	2	0|0|0|0|0|0|0|0|0	0.5	-1.13	15	0.12
ARRDC4	U2AF2	2|0	2	1	2	2|0|0|0|2|0|0|0|0	0.03	-5.73	0.75	0.4
ARRDC4	COL18A1	1|1	2	1	2	0|0|0|0|0|0|0|0|0	0	1.38	10	0.69
ARRDC4	MT1B	2|0	2	1	2	0|0|0|0|0|0|0|0|0	0.48	-1.13	10	0.18
ARRDC4	RNPS1	1|1	2	1	2	0|0|0|0|0|0|0|0|0	0	1.38	10	0.69
ARRDC4	BUB3	0|2	2	1	2	0|0|0|3|0|0|0|0|0	0.15	-3.72	1	0.34
ARRDC4	ALYREF	6|5	11	5.5	2	0|2|4|5|5|2|3|3|2	0	-9.88	1.18	0.55
ARRDC4	ECD	2|0	2	1	2	0|0|0|0|0|0|0|0|0	0.48	-1.13	10	0.18
ARRDC4	HACD3	16|10	26	13	2	3|9|7|5|6|6|10|10|0	0	-20.25	1.34	0.6
ARRDC4	MTHFD1	1|2	3	1.5	2	0|8|9|13|0|6|5|1|0	0	-39.88	0.15	0.69
ARRDC4	DOPEY2	3|4	7	3.5	2	0|0|0|0|0|0|0|0|0	1	5.25	35	0
ARRDC4	CCDC47	9|7	16	8	2	5|6|3|2|3|3|7|7|5	0	-14.03	1.2	0.59
ARRDC4	RNF113A	0|2	2	1	2	0|0|0|0|0|0|0|0|0	0.48	-1.13	10	0.18
ARRDC4	MRE11A	2|1	3	1.5	2	0|4|3|2|0|0|2|0|0	0	-10.17	0.5	0.55
ARRDC4	MYH9	6|7	13	6.5	2	3|17|98|19|4|0|3|0|0	0	-172.38	0.15	0.69
ARRDC4	FBXO21	3|0	3	1.5	2	0|0|0|0|0|0|0|0|0	0.5	-1.13	15	0.12
ARRDC4	RANBP9	0|2	2	1	2	0|0|0|0|0|4|2|0|0	0	-8.12	0.5	0.47
ARRDC4	RANBP2	8|11	19	9.5	2	3|6|2|3|1|5|6|9|5	0	-13.76	1.36	0.57
ARRDC4	AMBRA1	5|1	6	3	2	0|2|0|10|0|23|34|9|3	0	-93.37	0.13	0.69
ARRDC4	MERTK	2|1	3	1.5	2	0|0|0|0|0|0|0|0|0	0.48	1.38	15	0.18
ARRDC4	ZW10	5|5	10	5	2	2|0|0|0|2|0|0|0|0	0.87	1.9	3.75	0.01
ARRDC4	NUDT19	1|2	3	1.5	2	0|3|1|0|0|0|0|0|0	0.05	-3.84	1.12	0.39
ARRDC4	STX8	3|1	4	2	2	0|0|0|0|0|0|0|0|0	0.5	1.38	20	0.12
ARRDC4	CNNM3	3|3	6	3	2	0|0|0|0|0|0|0|0|0	0.99	5.25	30	0
ARRDC4	RTCB	1|1	2	1	2	0|3|4|7|0|2|4|0|5	0	-19.85	0.19	0.69
ARRDC4	STX4	1|2	3	1.5	2	0|0|0|0|0|0|0|0|0	0.48	1.38	15	0.18
ARRDC4	STX6	1|2	3	1.5	2	0|0|0|0|0|0|0|0|0	0.48	1.38	15	0.18
ARRDC4	TRAM1	3|4	7	3.5	2	0|3|2|0|0|2|6|3|3	0	-10.42	0.88	0.56
ARRDC4	KEAP1	3|4	7	3.5	2	0|0|0|0|0|0|0|0|0	1	5.25	35	0
ARRDC4	BASP1	2|3	5	2.5	2	0|10|15|8|2|0|5|0|0	0	-41.15	0.23	0.69
ARRDC4	MYO9A	6|2	8	4	2	0|0|0|0|0|0|0|0|0	0.98	3.41	40	0
ARRDC4	SMN1	3|2	5	2.5	2	0|0|0|0|0|2|4|0|0	0.03	-4.6	1.25	0.42
ARRDC4	IQGAP1	0|5	5	2.5	2	0|5|42|12|0|0|0|0|0	0	-85.41	0.13	0.69
ARRDC4	IQGAP3	23|13	36	18	2	7|0|0|2|3|2|11|0|0	0.43	-7.15	2.57	0.29
ARRDC4	YWHAZ	13|20	33	16.5	2	0|12|28|10|5|6|9|4|3	0	-40.12	0.99	0.66
ARRDC4	NOP58	3|1	4	2	2	2|1|6|2|2|1|6|0|0	0	-17.09	0.43	0.61
ARRDC4	NUP107	5|9	14	7	2	0|3|1|3|2|7|11|3|3	0	-17.93	1	0.6
ARRDC4	YWHAH	10|17	27	13.5	2	0|0|0|7|0|4|6|0|0	0.47	-6.34	2.38	0.29
ARRDC4	AURKB	3|4	7	3.5	2	2|3|0|3|6|4|14|3|3	0	-25.5	0.44	0.69
ARRDC4	YWHAB	12|17	29	14.5	2	0|9|22|9|0|0|8|0|0	0	-29.69	1.09	0.65
ARRDC4	YWHAG	11|19	30	15	2	4|7|14|7|6|4|6|3|2	0	-17.48	1.61	0.54
ARRDC4	YWHAE	20|28	48	24	2	0|25|19|12|9|7|11|6|3	0	-37.17	1.29	0.66
ARRDC4	RP2	1|1	2	1	2	0|0|0|0|0|0|0|0|0	0	1.38	10	0.69
ARRDC4	ATAD3B	53|0	53	26.5	2	43|47|27|32|55|58|90|48|46	0	-301.4	0.39	0.69
ARRDC4	ATAD3A	76|67	143	71.5	2	59|81|45|51|71|88|146|77|71	0	-279.7	0.68	0.69
ARRDC4	RP9	2|0	2	1	2	2|2|0|0|3|0|0|9|3	0	-21.09	0.2	0.69
ARRDC4	CDC42EP1	6|4	10	5	2	0|5|1|5|0|8|12|10|6	0	-31.91	0.5	0.66
ARRDC4	NBR1	3|1	4	2	2	0|4|0|2|0|5|9|7|0	0	-26.91	0.29	0.69
ARRDC4	DYNC1H1	10|5	15	7.5	2	0|17|43|15|0|0|2|0|0	0	-91.26	0.3	0.68
ARRDC4	TUBA4A	119|0	119	59.5	2	0|0|56|0|0|59|87|0|0	0	-300.02	0.88	0.68
ARRDC4	CHST14	5|2	7	3.5	2	4|0|0|2|2|2|4|0|0	0	-9.63	1.05	0.49
ARRDC4	VAMP7	3|3	6	3	2	0|0|0|0|0|0|0|0|0	0.99	5.25	30	0
ARRDC4	TMEM9	2|0	2	1	2	0|0|0|0|0|0|0|0|0	0.48	-1.13	10	0.18
ARRDC4	VPS11	2|0	2	1	2	0|0|0|0|0|0|0|0|0	0.48	-1.13	10	0.18
ARRDC4	IMMT	16|14	30	15	2	3|8|11|7|0|6|12|6|4	0	-16.88	1.45	0.62
ARRDC4	NDUFB4	3|2	5	2.5	2	3|3|4|0|3|0|3|0|0	0	-9.63	0.75	0.54
ARRDC4	EFTUD2	19|13	32	16	2	6|15|10|8|6|6|15|16|8	0	-35.97	1.04	0.66
ARRDC4	CLN6	2|0	2	1	2	0|0|0|0|0|0|0|0|0	0.48	-1.13	10	0.18
ARRDC4	ZC3HAV1	4|5	9	4.5	2	4|2|0|2|3|3|4|5|7	0	-13.74	0.84	0.6
ARRDC4	QPCTL	3|2	5	2.5	2	7|6|4|5|5|3|17|4|1	0	-36.31	0.25	0.69
ARRDC4	H2BFS	3|2	5	2.5	2	1|0|4|0|4|0|0|0|0	0	-8.34	0.83	0.52
ARRDC4	AUP1	9|8	17	8.5	2	0|3|3|0|3|3|9|4|2	0	-7.82	1.59	0.51
ARRDC4	ACOT8	2|4	6	3	2	0|0|0|2|0|3|1|0|0	0.06	-4.84	1.5	0.38
ARRDC4	USP30	1|2	3	1.5	2	0|0|0|0|2|0|4|0|0	0	-6.02	0.75	0.47
ARRDC4	TOR1AIP2	2|2	4	2	2	0|0|0|0|0|0|0|0|0	0.97	3.41	20	0.01
ARRDC4	ADCY6	3|0	3	1.5	2	0|0|0|0|0|0|0|0|0	0.5	-1.13	15	0.12
ARRDC4	TOR1AIP1	3|3	6	3	2	3|4|3|12|3|4|7|4|6	0	-27.4	0.36	0.69
ARRDC4	PLD2	1|2	3	1.5	2	0|0|0|0|0|0|0|0|0	0.48	1.38	15	0.18
ARRDC4	PLD3	5|3	8	4	2	0|1|2|4|0|1|0|1|0	0.08	-4.55	1.71	0.37
ARRDC4	LIMA1	21|18	39	19.5	2	6|0|1|0|17|0|0|0|5	0	-8.9	2.09	0.51
ARRDC4	RBBP7	5|6	11	5.5	2	0|11|6|2|0|1|2|3|0	0	-16.73	0.82	0.62
ARRDC4	ADCY9	5|3	8	4	2	0|0|0|0|0|0|0|0|0	1	5.25	40	0
ARRDC4	BMPR2	9|3	12	6	2	0|0|0|0|0|0|0|0|0	1	5.25	60	0
ARRDC4	RNF216	0|2	2	1	2	0|0|0|0|0|0|0|0|0	0.48	-1.13	10	0.18
ARRDC4	GBF1	1|3	4	2	2	0|0|0|0|0|0|0|0|0	0.5	1.38	20	0.12
ARRDC4	RNF213	2|0	2	1	2	0|0|0|0|0|0|0|0|0	0.48	-1.13	10	0.18
ARRDC4	MED23	0|2	2	1	2	0|0|0|0|0|0|0|0|0	0.48	-1.13	10	0.18
ARRDC4	DOCK7	2|1	3	1.5	2	0|0|0|0|0|0|0|0|0	0.48	1.38	15	0.18
ARRDC4	XRCC5	0|3	3	1.5	2	0|5|6|5|0|2|5|0|0	0	-22.92	0.28	0.62
ARRDC4	XRCC6	7|3	10	5	2	3|11|21|11|0|6|14|0|0	0	-56.61	0.33	0.69
ARRDC4	SMURF1	3|3	6	3	2	0|0|0|0|0|0|0|0|0	0.99	5.25	30	0
ARRDC4	SLC9A1	5|2	7	3.5	2	0|0|0|0|0|0|0|0|0	0.98	3.41	35	0
ARRDC4	UBAP2L	9|7	16	8	2	3|17|7|14|2|13|43|48|13	0	-132.63	0.22	0.69
ARRDC4	JUP	20|16	36	18	2	6|3|50|5|8|5|3|6|9	0	-55.46	0.81	0.68
ARRDC4	RBM39	3|4	7	3.5	2	4|3|3|3|2|0|0|3|2	0	-8.09	1.05	0.52
ARRDC4	EPHB2	4|0	4	2	2	0|0|0|0|0|0|0|0|0	0.5	-1.13	20	0.09
ARRDC4	POM121	2|1	3	1.5	2	0|1|0|0|0|0|0|2|1	0.04	-3.96	1.12	0.4
ARRDC4	EPHB4	4|3	7	3.5	2	0|0|0|0|0|0|0|0|0	1	5.25	35	0
ARRDC4	PARP1	4|1	5	2.5	2	0|1|2|5|0|5|5|0|2	0	-18.41	0.5	0.6
ARRDC4	IL13RA1	3|3	6	3	2	0|0|0|0|0|0|0|0|0	0.99	5.25	30	0
ARRDC4	LMNB1	2|1	3	1.5	2	3|0|7|4|3|4|5|0|0	0	-19.85	0.28	0.69
ARRDC4	MRPS27	0|2	2	1	2	1|4|0|1|1|0|5|1|0	0	-14.14	0.3	0.57
ARRDC4	LAMTOR1	1|1	2	1	2	0|0|0|0|0|0|0|0|0	0	1.38	10	0.69
ARRDC4	YY1	2|0	2	1	2	0|0|0|0|0|0|0|0|0	0.48	-1.13	10	0.18
ARRDC4	EARS2	2|0	2	1	2	0|0|0|2|0|3|3|0|0	0	-11.31	0.38	0.53
ARRDC4	ACTC1	43|16	59	29.5	2	0|24|47|12|32|5|6|4|12	0	-103.38	0.86	0.68
ARRDC4	NAMPT	2|2	4	2	2	2|3|22|0|0|0|0|0|0	0	-31.41	0.22	0.69
ARRDC4	FBXO3	4|2	6	3	2	4|0|0|3|3|2|3|0|0	0	-9.63	0.9	0.52
ARRDC4	CTNND1	6|2	8	4	2	0|3|9|0|0|0|5|0|1	0	-18.69	0.71	0.6
ARRDC4	TCEB2	4|3	7	3.5	2	0|0|0|2|0|3|5|0|0	0	-8.09	1.05	0.52
ARRDC4	UGGT2	5|2	7	3.5	2	0|0|0|1|0|3|6|0|0	0	-9.44	1.05	0.48
ARRDC4	UGGT1	6|6	12	6	2	2|11|6|21|1|22|42|12|0	0	-102.96	0.21	0.69
ARRDC4	RPS26	1|2	3	1.5	2	3|7|6|5|3|4|9|6|1	0	-28.36	0.2	0.69
ARRDC4	RPS27	5|9	14	7	2	5|19|9|17|3|17|28|23|19	0	-85.17	0.3	0.69
ARRDC4	RPS25	2|3	5	2.5	2	3|5|5|10|3|4|6|3|2	0	-24.25	0.36	0.69
ARRDC4	RPS20	2|1	3	1.5	2	0|5|8|4|0|2|6|3|2	0	-24.09	0.24	0.69
ARRDC4	SLFN11	7|4	11	5.5	2	0|1|0|4|0|5|14|4|1	0	-22.1	0.72	0.63
ARRDC4	NT5DC2	5|5	10	5	2	3|5|2|5|3|8|8|6|2	0	-19.51	0.68	0.64
ARRDC4	PREB	4|1	5	2.5	2	0|5|1|1|2|0|6|4|1	0	-18.41	0.5	0.6
ARRDC4	ARPC5L	2|1	3	1.5	2	0|0|0|0|0|0|0|0|0	0.48	1.38	15	0.18
ARRDC4	PPIA	4|5	9	4.5	2	0|15|24|7|0|1|4|0|0	0	-53.35	0.29	0.69
ARRDC4	SARS2	2|2	4	2	2	0|2|2|0|0|0|0|0|0	0.07	-2.6	1.5	0.38
ARRDC4	CYFIP1	5|1	6	3	2	0|0|0|0|0|0|0|0|0	0.5	1.38	30	0.08
ARRDC4	CYFIP2	0|2	2	1	2	0|0|0|0|0|0|0|0|0	0.48	-1.13	10	0.18
ARRDC4	AIMP2	2|0	2	1	2	0|0|0|0|0|0|3|0|0	0.15	-3.72	1	0.34
ARRDC4	AIMP1	1|1	2	1	2	0|0|4|0|0|0|0|0|0	0	-3.51	0.75	0.69
ARRDC4	MPRIP	2|0	2	1	2	0|0|0|0|4|0|0|0|0	0.07	-5.2	0.75	0.38
ARRDC4	MDH2	0|2	2	1	2	0|22|25|21|0|0|6|1|0	0	-100.19	0.04	0.69
ARRDC4	YES1	2|4	6	3	2	0|0|0|0|0|0|0|0|0	0.98	3.41	30	0
ARRDC4	THUMPD3	2|2	4	2	2	0|0|0|0|0|0|0|0|0	0.97	3.41	20	0.01
ARRDC4	NUP188	2|1	3	1.5	2	0|6|1|3|0|3|13|9|0	0	-36.97	0.16	0.69
ARRDC4	COPG2	7|7	14	7	2	0|5|4|1|2|3|4|2|0	0	-5.88	1.62	0.49
ARRDC4	HNRNPA2B1	4|5	9	4.5	2	1|8|19|8|6|0|4|2|2	0	-38.26	0.39	0.69
ARRDC4	COPG1	0|2	2	1	2	0|1|6|2|0|0|2|0|0	0	-14.05	0.3	0.57
ARRDC4	MYBBP1A	6|6	12	6	2	3|6|2|8|5|5|9|2|0	0	-19.09	0.78	0.64
ARRDC4	PPP6R2	2|2	4	2	2	0|0|0|0|0|0|0|0|0	0.97	3.41	20	0.01
ARRDC4	PPP6R1	5|4	9	4.5	2	0|0|0|2|0|4|5|0|0	0	-7.81	1.23	0.51
ARRDC4	NCAPH2	2|1	3	1.5	2	0|0|0|0|0|0|0|0|0	0.48	1.38	15	0.18
ARRDC4	NOP56	4|3	7	3.5	2	5|0|0|2|2|2|3|0|0	0	-8.09	1.05	0.52
ARRDC4	DARS	9|7	16	8	2	0|8|8|3|0|0|0|1|0	0	-12.82	1.26	0.58
ARRDC4	GLG1	3|1	4	2	2	0|0|0|0|0|0|0|0|0	0.5	1.38	20	0.12
ARRDC4	TRMT11	1|1	2	1	2	0|0|0|0|0|0|0|0|0	0	1.38	10	0.69
ARRDC4	STUB1	2|2	4	2	2	0|0|0|0|0|0|0|0|0	0.97	3.41	20	0.01
ARRDC4	FLII	3|4	7	3.5	2	0|2|2|2|2|1|6|2|0	0	-7.98	1.05	0.51
ARRDC4	STK11IP	8|8	16	8	2	0|0|0|0|0|2|5|4|0	0.09	-2.28	2.18	0.37
ARRDC4	P4HB	3|3	6	3	2	5|20|41|11|3|4|10|4|3	0	-93.16	0.12	0.69
ARRDC4	CHTOP	0|2	2	1	2	0|0|0|0|6|0|4|0|0	0	-13.8	0.3	0.57
ARRDC4	CSNK1G2	1|1	2	1	2	0|0|0|0|0|0|0|0|0	0	1.38	10	0.69
ARRDC4	CSNK1G3	2|2	4	2	2	0|0|0|0|0|0|0|0|0	0.97	3.41	20	0.01
ARRDC4	MAGED1	18|15	33	16.5	2	0|6|3|17|0|13|32|11|0	0	-51.76	0.8	0.68
ARRDC4	MAGED4	3|0	3	1.5	2	0|0|0|0|0|0|3|0|0	0.28	-3.72	1.5	0.31
ARRDC4	UBB	5|4	9	4.5	2	1|2|5|2|1|1|1|1|1	0.01	-5.46	1.5	0.45
ARRDC4	UBC	13|10	23	11.5	2	2|4|12|5|2|3|3|4|4	0	-10.67	1.64	0.53
ARRDC4	RBPMS2	3|0	3	1.5	2	0|2|0|2|0|4|11|2|0	0	-23.9	0.26	0.63
ARRDC4	FBXL4	4|2	6	3	2	6|0|0|0|5|0|0|0|4	0	-16.08	0.6	0.6
ARRDC4	DEK	0|2	2	1	2	0|0|0|3|0|0|0|0|0	0.15	-3.72	1	0.34
ARRDC4	ST13	0|4	4	2	2	0|5|5|8|0|1|3|2|0	0	-25.84	0.33	0.63
ARRDC4	PCBP2	11|11	22	11	2	3|5|12|12|7|8|10|3|3	0	-24.68	0.97	0.65
ARRDC4	PCBP1	10|8	18	9	2	3|8|16|11|5|9|13|5|3	0	-37.02	0.67	0.67
ARRDC4	NPEPPS	0|2	2	1	2	0|9|19|10|0|0|0|0|0	0	-55.18	0.08	0.69
ARRDC4	ENSG00000260914	1|2	3	1.5	2	2|0|0|2|0|1|1|0|0	0.01	-5.16	0.9	0.44
ARRDC4	PLEC	8|5	13	6.5	2	0|0|76|1|6|0|2|0|0	0	-103.21	0.23	0.69
ARRDC4	RBM25	5|3	8	4	2	0|3|3|0|2|0|0|3|2	0.01	-6.91	1.33	0.45
ARRDC4	RBM22	2|1	3	1.5	2	0|0|0|0|0|0|0|0|0	0.48	1.38	15	0.18
ARRDC4	CLDN12	1|1	2	1	2	0|0|0|0|0|0|0|0|0	0	1.38	10	0.69
ARRDC4	ENSG00000198211	80|79	159	79.5	2	42|0|47|0|0|98|115|78|0	0	-229	0.82	0.69
ARRDC4	ASPH	5|4	9	4.5	2	0|0|0|0|0|1|2|0|0	0.84	1.22	4.5	0.02
ARRDC4	EPHA4	0|2	2	1	2	0|0|0|0|0|0|0|0|0	0.48	-1.13	10	0.18
ARRDC4	EPHA3	3|0	3	1.5	2	0|0|0|0|0|0|0|0|0	0.5	-1.13	15	0.12
ARRDC4	HNRNPH1	7|8	15	7.5	2	3|17|14|2|8|4|11|13|6	0	-44.25	0.51	0.69
ARRDC4	HNRNPH3	1|1	2	1	2	0|2|4|0|0|0|0|1|0	0	-7.6	0.43	0.69
ARRDC4	HNRNPH2	6|3	9	4.5	2	0|6|11|0|0|0|4|4|0	0	-21.78	0.64	0.63
ARRDC4	ATP5B	13|15	28	14	2	6|50|67|41|5|9|18|11|4	0	-186.98	0.27	0.69
ARRDC4	GNAI2	3|3	6	3	2	0|3|3|3|0|0|0|0|0	0	-6.91	1	0.51
ARRDC4	GNAI3	3|3	6	3	2	0|3|5|3|0|0|0|0|0	0	-9.28	0.82	0.56
ARRDC4	TBK1	5|7	12	6	2	2|8|2|7|0|15|17|11|3	0	-47.34	0.42	0.69
ARRDC4	TBC1D7	0|2	2	1	2	0|0|0|0|0|0|0|0|0	0.48	-1.13	10	0.18
ARRDC4	HSPA12A	1|1	2	1	2	0|0|0|0|0|0|0|0|0	0	1.38	10	0.69
ARRDC4	FAM127B	1|1	2	1	2	0|0|0|0|0|1|2|0|0	0	-2.76	1	0.69
ARRDC4	FAM127A	1|1	2	1	2	0|0|0|0|0|1|2|0|0	0	-2.76	1	0.69
ARRDC4	PFDN2	2|2	4	2	2	0|3|4|2|0|0|2|0|0	0	-8.34	0.67	0.54
ARRDC4	DTNA	1|1	2	1	2	0|0|0|0|0|0|0|0|0	0	1.38	10	0.69
ARRDC4	SYNE2	2|0	2	1	2	0|0|0|0|0|0|0|0|0	0.48	-1.13	10	0.18
ARRDC4	GOPC	2|0	2	1	2	0|0|0|0|0|0|0|0|0	0.48	-1.13	10	0.18
ARRDC4	HNRNPUL1	4|3	7	3.5	2	2|22|5|10|3|12|25|31|4	0	-102.92	0.13	0.69
ARRDC4	YTHDC2	14|11	25	12.5	2	0|14|0|10|0|18|36|16|5	0	-69.77	0.54	0.68
ARRDC4	BSG	4|0	4	2	2	0|2|1|4|0|2|4|3|0	0	-15.64	0.55	0.54
ARRDC4	MET	4|2	6	3	2	0|0|0|0|0|0|0|0|0	0.98	3.41	30	0
ARRDC4	MMP24-AS1	2|1	3	1.5	2	0|0|0|0|0|0|0|0|0	0.48	1.38	15	0.18
ARRDC4	RPS13	1|1	2	1	2	2|10|10|7|5|4|11|7|4	0	-41.35	0.1	0.69
ARRDC4	OXNAD1	0|2	2	1	2	1|0|0|0|1|0|0|0|0	0.23	-3.17	1.5	0.32
ARRDC4	RPS11	3|0	3	1.5	2	2|3|2|3|0|3|5|0|3	0	-15.64	0.41	0.57
ARRDC4	CEP131	0|2	2	1	2	0|0|0|0|2|0|0|0|0	0.26	-3.3	1.5	0.32
ARRDC4	RPS16	2|2	4	2	2	2|7|12|5|2|4|11|2|2	0	-36.86	0.2	0.69
ARRDC4	RPS14	4|5	9	4.5	2	6|10|13|7|8|10|15|7|6	0	-42.87	0.36	0.69
ARRDC4	ARL1	4|2	6	3	2	2|3|0|2|3|2|3|3|2	0	-8.34	1	0.49
ARRDC4	RPS19	0|3	3	1.5	2	3|7|8|8|3|4|12|3|3	0	-40.64	0.16	0.69
ARRDC4	RPS18	5|3	8	4	2	4|13|12|9|4|7|12|7|6	0	-44.03	0.32	0.69
ARRDC4	DDOST	9|6	15	7.5	2	3|8|7|7|5|7|9|9|9	0	-24.04	0.83	0.64
ARRDC4	CLPB	3|2	5	2.5	2	2|3|3|0|0|2|4|2|0	0	-9.63	0.75	0.54
ARRDC4	SRCIN1	1|2	3	1.5	2	0|0|0|0|0|7|5|0|0	0	-13.76	0.38	0.6
ARRDC4	OSMR	2|3	5	2.5	2	0|0|0|0|0|0|0|0|0	0.98	3.41	25	0
ARRDC4	UBE2G2	2|0	2	1	2	0|0|0|0|0|0|0|0|0	0.48	-1.13	10	0.18
ARRDC4	SLC35E1	2|0	2	1	2	0|0|0|0|0|0|0|0|0	0.48	-1.13	10	0.18
ARRDC4	DPY19L1	0|2	2	1	2	0|0|0|0|0|0|0|0|0	0.48	-1.13	10	0.18
ARRDC4	PABPN1	0|2	2	1	2	0|0|0|0|0|0|0|0|0	0.48	-1.13	10	0.18
ARRDC4	LZTS2	2|0	2	1	2	0|0|0|0|0|0|3|0|0	0.15	-3.72	1	0.34
ARRDC4	MAP7D3	0|2	2	1	2	0|0|0|0|0|0|0|0|0	0.48	-1.13	10	0.18
ARRDC4	MAP7D2	3|4	7	3.5	2	4|0|0|1|4|0|3|1|8	0	-15.46	0.66	0.61
ARRDC4	MAP7D1	0|2	2	1	2	0|0|0|0|0|0|0|0|0	0.48	-1.13	10	0.18
ARRDC4	GGT7	2|0	2	1	2	0|0|0|0|0|0|0|0|0	0.48	-1.13	10	0.18
ARRDC4	TMX3	7|7	14	7	2	0|2|2|3|0|1|3|2|0	0.43	-0.3	2.62	0.29
ARRDC4	MCOLN2	2|1	3	1.5	2	0|0|0|0|0|0|0|0|0	0.48	1.38	15	0.18
ARRDC4	PTPRU	2|2	4	2	2	0|0|0|0|0|0|0|0|0	0.97	3.41	20	0.01
ARRDC4	ACTN4	23|12	35	17.5	2	5|15|45|10|21|0|0|0|10	0	-82.07	0.65	0.68
ARRDC4	TRAP1	10|14	24	12	2	0|9|9|6|0|5|5|3|0	0	-14.4	1.5	0.56
ARRDC4	PTPRG	1|1	2	1	2	0|0|0|0|0|0|0|0|0	0	1.38	10	0.69
ARRDC4	TRABD	2|1	3	1.5	2	0|0|0|0|0|0|0|0|0	0.48	1.38	15	0.18
ARRDC4	C17orf75	1|2	3	1.5	2	0|0|0|0|0|0|0|0|0	0.48	1.38	15	0.18
ARRDC4	FKBP4	0|2	2	1	2	0|9|14|4|0|0|0|0|0	0	-38.73	0.11	0.69
ARRDC4	RARS2	11|7	18	9	2	0|2|0|2|3|5|8|3|1	0.01	-9.37	1.69	0.45
ARRDC4	FKBP8	7|8	15	7.5	2	0|3|0|2|0|4|6|4|0	0	-7.03	1.61	0.49
ARRDC4	APBB1	4|0	4	2	2	0|0|0|0|0|0|0|0|0	0.5	-1.13	20	0.09
ARRDC4	SV2A	3|1	4	2	2	0|0|0|0|0|0|0|0|0	0.5	1.38	20	0.12
ARRDC4	IRAK1	8|7	15	7.5	2	3|3|2|3|3|3|11|8|0	0	-16.1	1.02	0.62
ARRDC4	WDR7	3|3	6	3	2	0|0|0|0|0|0|0|0|0	0.99	5.25	30	0
ARRDC4	WDR6	16|10	26	13	2	0|2|0|2|2|5|7|5|1	0.4	-6.34	2.29	0.3
ARRDC4	GATA6	2|0	2	1	2	2|2|0|0|4|0|0|3|6	0	-18.53	0.23	0.61
ARRDC4	HSD17B12	8|7	15	7.5	2	3|11|7|1|4|5|14|10|4	0	-32.45	0.64	0.66
ARRDC4	HSD17B10	2|3	5	2.5	2	0|6|11|3|0|1|3|0|0	0	-22.6	0.38	0.64
ARRDC4	ATP6V1A	2|0	2	1	2	0|1|8|0|0|0|0|0|0	0	-11.85	0.33	0.54
ARRDC4	RPS27L	5|0	5	2.5	2	4|2|0|16|0|16|25|18|2	0	-86.81	0.13	0.69
ARRDC4	ACVR1B	5|3	8	4	2	0|0|0|0|0|0|0|0|0	1	5.25	40	0
ARRDC4	RPS27A	3|2	5	2.5	2	0|1|2|1|0|1|1|1|1	0.16	-2.47	1.88	0.34
ARRDC4	ATP6V1H	0|2	2	1	2	0|0|5|0|0|0|0|0|0	0.03	-6.68	0.6	0.41
ARRDC4	SFXN4	5|8	13	6.5	2	0|0|0|3|0|3|7|3|2	0.01	-8.71	1.5	0.46
ARRDC4	SFXN2	4|2	6	3	2	2|0|0|0|0|2|1|4|0	0.01	-7.22	1.12	0.46
ARRDC4	CCT8	41|38	79	39.5	2	3|21|12|12|8|8|13|6|3	0.15	-4.04	2.58	0.35
ARRDC4	PANK4	0|2	2	1	2	0|0|0|0|0|0|0|0|0	0.48	-1.13	10	0.18
ARRDC4	CCT2	31|25	56	28	2	0|19|24|11|0|2|7|0|0	0	-28.12	1.56	0.64
ARRDC4	CCT3	29|21	50	25	2	4|14|14|8|6|5|8|3|1	0.04	-12.96	2.08	0.4
ARRDC4	CCT7	30|20	50	25	2	0|10|11|5|3|1|5|0|0	0.52	-3.02	2.88	0.06
ARRDC4	CCT4	23|15	38	19	2	2|20|18|10|4|3|6|0|0	0	-35.14	1.19	0.65
ARRDC4	CCT5	25|15	40	20	2	0|10|9|3|2|0|0|0|0	0.48	-5.89	2.73	0.29
ARRDC4	EPPK1	9|7	16	8	2	1|7|156|2|8|0|4|2|4	0	-222.28	0.14	0.69
ARRDC4	TIMM13	1|1	2	1	2	2|2|2|1|2|1|1|2|0	0	-6.26	0.5	0.69
ARRDC4	PDLIM5	3|2	5	2.5	2	1|0|5|0|2|0|0|0|0	0	-7.13	0.94	0.49
ARRDC4	SSBP1	3|1	4	2	2	0|1|3|0|0|1|6|0|0	0	-11.37	0.6	0.55
ARRDC4	MCCC2	2|1	3	1.5	2	0|0|0|0|0|0|0|0|0	0.48	1.38	15	0.18
ARRDC4	WDR34	1|1	2	1	2	0|0|0|0|0|0|0|0|0	0	1.38	10	0.69
ARRDC4	WDR37	1|1	2	1	2	0|0|0|0|0|0|0|0|0	0	1.38	10	0.69
ARRDC4	KRT14	0|24	24	12	2	27|40|225|40|33|90|67|53|63	0	-568.41	0.09	0.69
ARRDC4	KRT10	21|21	42	21	2	41|80|299|26|48|134|77|148|100	0	#NAME?	0.11	0.69
ARRDC4	FLNA	12|15	27	13.5	2	3|44|57|55|16|2|15|0|0	0	-187.44	0.26	0.69
ARRDC4	FLNB	13|15	28	14	2	0|2|39|10|5|0|0|0|0	0	-44.47	0.78	0.67
ARRDC4	FLNC	3|6	9	4.5	2	0|0|0|0|0|0|0|0|0	1	5.25	45	0
ARRDC4	EIF4A1	8|11	19	9.5	2	4|32|37|8|1|3|7|4|5	0	-86	0.37	0.69
ARRDC4	KRT19	151|140	291	145.5	2	54|49|38|169|73|243|268|69|95	0	-613.38	0.64	0.69
ARRDC4	KRT18	55|55	110	55	2	31|25|11|54|39|96|134|30|58	0	-267.6	0.57	0.69
ARRDC4	ABHD17A	2|0	2	1	2	0|0|0|0|0|0|0|0|0	0.48	-1.13	10	0.18
ARRDC4	TNFRSF10B	4|5	9	4.5	2	0|0|0|0|0|0|0|0|0	1	6.99	45	0
ARRDC4	PRKCSH	0|3	3	1.5	2	0|4|7|11|0|0|0|0|0	0	-31.61	0.2	0.65
ARRDC4	POLN	0|2	2	1	2	0|0|0|0|0|0|0|0|0	0.48	-1.13	10	0.18
ARRDC4	HIST1H2BN	5|5	10	5	2	2|1|8|2|7|1|3|0|0	0	-14.6	0.83	0.61
ARRDC4	CDC7	3|2	5	2.5	2	0|0|0|0|0|0|5|0|0	0.12	-2.89	1.5	0.35
ARRDC4	KNTC1	5|6	11	5.5	2	0|0|0|0|0|0|0|0|0	1	8.67	55	0
ARRDC4	TM9SF1	4|1	5	2.5	2	0|0|0|0|0|0|0|0|0	0.5	1.38	25	0.09
ARRDC4	TM9SF3	2|1	3	1.5	2	0|0|0|0|0|0|0|0|0	0.48	1.38	15	0.18
ARRDC4	RBM14	3|5	8	4	2	5|7|4|8|7|9|13|4|8	0	-34.25	0.4	0.69
ARRDC4	FAM96B	4|3	7	3.5	2	0|2|2|3|0|3|3|2|0	0	-6.91	1.17	0.49
ARRDC4	ADGRL2	4|2	6	3	2	0|0|0|1|0|2|4|0|0	0.02	-6.03	1.29	0.42
ARRDC4	ADGRL1	4|4	8	4	2	0|0|0|0|0|0|0|0|0	1	6.99	40	0
ARRDC4	GRAMD1A	6|3	9	4.5	2	4|3|0|2|5|2|5|2|7	0	-16.76	0.79	0.6
ARRDC4	EI24	0|3	3	1.5	2	0|0|0|0|0|0|0|0|0	0.5	-1.13	15	0.12
ARRDC4	WDR61	3|3	6	3	2	0|0|0|1|0|0|2|0|0	0.5	0.01	3	0.06
ARRDC4	RELL1	7|4	11	5.5	2	0|0|0|0|0|0|0|0|0	1	6.99	55	0
ARRDC4	MARS	4|4	8	4	2	2|5|4|4|2|1|9|3|0	0	-16.22	0.67	0.62
ARRDC4	TUBGCP2	15|15	30	15	2	3|2|0|2|2|6|6|5|0	0.54	0.16	2.65	0.05
ARRDC4	TUBGCP3	9|9	18	9	2	2|2|0|0|4|3|7|4|1	0	-5.43	1.8	0.47
ARRDC4	TUBGCP4	5|4	9	4.5	2	0|3|0|3|0|7|8|4|0	0	-17.47	0.71	0.62
ARRDC4	TUBGCP5	1|3	4	2	2	0|0|0|0|0|0|0|0|0	0.5	1.38	20	0.12
ARRDC4	TUBGCP6	4|2	6	3	2	0|0|0|0|0|2|5|0|0	0.03	-5.69	1.29	0.41
ARRDC4	PSMD7	4|3	7	3.5	2	0|1|6|0|0|0|0|0|0	0.05	-3.86	1.5	0.39
ARRDC4	PSMD6	4|1	5	2.5	2	0|4|0|0|0|0|0|0|0	0.29	-3.51	1.88	0.31
ARRDC4	PSMD3	30|14	44	22	2	0|10|9|3|0|3|4|3|2	0.5	-7.81	2.87	0.07
ARRDC4	CTNNB1	3|3	6	3	2	0|0|7|1|0|2|8|0|0	0	-16.59	0.53	0.63
ARRDC4	ANKRD46	1|1	2	1	2	0|0|0|0|0|0|0|0|0	0	1.38	10	0.69
ARRDC4	TRIM28	38|25	63	31.5	2	7|21|21|26|10|23|46|15|7	0	-75.95	0.99	0.68
ARRDC4	CPSF3	2|2	4	2	2	0|0|0|0|0|0|4|0|0	0.14	-1.79	1.5	0.35
ARRDC4	CPSF1	0|2	2	1	2	0|0|0|0|0|0|0|0|0	0.48	-1.13	10	0.18
ARRDC4	ACAA2	4|4	8	4	2	0|2|3|8|0|0|0|0|0	0	-9.86	0.92	0.57
ARRDC4	CNOT3	3|0	3	1.5	2	0|0|0|0|0|3|3|0|0	0.02	-8.26	0.75	0.43
ARRDC4	AARS2	1|2	3	1.5	2	2|0|0|3|4|2|7|0|0	0	-17.06	0.32	0.69
ARRDC4	SIPA1L2	2|4	6	3	2	0|0|0|0|0|3|3|0|0	0.07	-4.74	1.5	0.38
ARRDC4	HSD17B4	0|2	2	1	2	0|4|16|10|0|2|5|0|0	0	-44.67	0.1	0.69
ARRDC4	TRIM26	5|3	8	4	2	3|0|0|0|1|0|0|0|0	0.5	-0.97	3	0.06
ARRDC4	IPO8	5|6	11	5.5	2	0|0|0|2|0|2|3|0|0	0.26	-1.79	2.36	0.32
ARRDC4	LTBP1	3|0	3	1.5	2	1|0|0|0|1|0|0|0|0	0.37	-3.17	2.25	0.3
ARRDC4	KPNB1	13|7	20	10	2	4|21|21|5|9|6|15|12|13	0	-61.81	0.53	0.68
ARRDC4	HGS	1|2	3	1.5	2	0|0|0|0|0|0|0|0|0	0.48	1.38	15	0.18
ARRDC4	ABR	3|4	7	3.5	2	1|3|0|1|2|0|3|2|1	0.01	-5.73	1.31	0.46
ARRDC4	SLC35F5	3|0	3	1.5	2	0|0|0|0|0|0|0|0|0	0.5	-1.13	15	0.12
ARRDC4	LCE4A	0|5	5	2.5	2	0|0|0|0|0|0|0|0|0	0.5	-1.13	25	0.08
ARRDC4	MAN1B1	3|3	6	3	2	0|0|0|0|0|0|3|0|0	0.56	0.24	3	0.05
ARRDC4	PKP4	9|11	20	10	2	4|7|0|8|14|13|26|9|13	0	-51.63	0.57	0.68
ARRDC4	PKP3	6|0	6	3	2	3|0|23|3|4|4|7|0|8	0	-54.71	0.24	0.67
ARRDC4	PKP2	7|5	12	6	2	4|5|0|8|9|8|15|6|10	0	-35.13	0.53	0.69
ARRDC4	SLC25A19	6|8	14	7	2	2|1|1|4|2|6|6|4|2	0	-10.78	1.31	0.54
ARRDC4	SLC25A17	4|4	8	4	2	0|0|0|0|0|1|3|0|0	0.53	0.11	3	0.05
ARRDC4	SLC25A13	17|17	34	17	2	12|17|13|15|13|13|33|22|6	0	-61.11	0.71	0.68
ARRDC4	SLC25A12	12|9	21	10.5	2	7|6|2|8|8|6|16|6|2	0	-25.07	0.98	0.64
ARRDC4	SLC25A11	18|16	34	17	2	6|8|6|9|8|8|12|11|7	0	-15.24	1.59	0.6
ARRDC4	LBR	1|3	4	2	2	0|4|5|1|0|0|5|3|0	0	-17.06	0.43	0.61
ARRDC4	RAN	4|3	7	3.5	2	0|8|10|5|0|3|4|5|3	0	-24.7	0.46	0.69
ARRDC4	ATP5J2-PTCD1	2|1	3	1.5	2	0|0|0|0|0|0|5|0|0	0.03	-4.77	0.9	0.41
ARRDC4	SLC12A4	3|4	7	3.5	2	0|0|0|0|0|0|0|0|0	1	5.25	35	0
ARRDC4	SLC12A7	4|1	5	2.5	2	0|0|0|0|0|0|0|0|0	0.5	1.38	25	0.09
ARRDC4	NDUFA12	3|3	6	3	2	2|3|1|2|1|3|6|5|0	0	-12.94	0.64	0.6
ARRDC4	LSS	0|2	2	1	2	0|0|0|0|0|0|0|0|0	0.48	-1.13	10	0.18
ARRDC4	SIPA1L1	3|0	3	1.5	2	0|0|0|0|0|0|3|0|0	0.28	-3.72	1.5	0.31
ARRDC4	TNFRSF21	2|3	5	2.5	2	0|0|0|0|0|0|0|0|0	0.98	3.41	25	0
ARRDC4	CACHD1	1|2	3	1.5	2	0|0|0|0|0|0|0|0|0	0.48	1.38	15	0.18
ARRDC4	CNOT1	7|8	15	7.5	2	0|6|1|5|0|11|19|5|7	0	-34.6	0.61	0.67
ARRDC4	PSMC4	14|7	21	10.5	2	2|9|8|0|2|1|5|8|2	0	-19.94	1.26	0.58
ARRDC4	ADCY3	2|0	2	1	2	0|0|0|0|0|0|0|0|0	0.48	-1.13	10	0.18
ARRDC4	VIM	169|154	323	161.5	2	62|32|51|53|145|70|65|35|82	0	-136.5	1.63	0.69
ARRDC4	N4BP3	2|0	2	1	2	0|0|0|0|0|0|0|0|0	0.48	-1.13	10	0.18
ARRDC4	PHB	1|1	2	1	2	0|10|10|4|0|3|3|3|3	0	-31.12	0.12	0.69
ARRDC4	YIPF4	1|1	2	1	2	0|0|0|0|0|0|0|0|0	0	1.38	10	0.69
ARRDC4	SNX3	3|2	5	2.5	2	0|0|0|0|0|0|0|0|0	0.98	3.41	25	0
ARRDC4	SNX2	0|2	2	1	2	0|2|2|0|0|0|0|0|0	0.03	-5.73	0.75	0.4
ARRDC4	CYB5R3	0|2	2	1	2	1|4|5|4|5|1|5|2|0	0	-21.43	0.2	0.69
ARRDC4	SPTAN1	20|15	35	17.5	2	4|5|27|5|15|0|0|0|0	0	-33.27	1.12	0.66
ARRDC4	RPL27A	1|2	3	1.5	2	2|3|5|3|1|3|5|4|1	0	-17.06	0.32	0.69
ARRDC4	ALG1	3|0	3	1.5	2	0|3|0|1|0|1|4|2|0	0	-12.67	0.5	0.52
ARRDC4	RNGTT	1|1	2	1	2	0|0|0|2|0|3|1|0|0	0	-6.26	0.5	0.69
ARRDC4	FUK	2|0	2	1	2	0|0|0|0|0|0|0|0|0	0.48	-1.13	10	0.18
ARRDC4	SLC11A2	0|3	3	1.5	2	0|0|0|0|0|0|0|0|0	0.5	-1.13	15	0.12
ARRDC4	KHSRP	0|3	3	1.5	2	0|18|22|15|0|8|18|6|0	0	-85.27	0.08	0.69
ARRDC4	ENSG00000257046	3|0	3	1.5	2	0|0|0|0|0|0|0|0|0	0.5	-1.13	15	0.12
ARRDC4	FTSJ1	2|0	2	1	2	0|0|0|0|0|2|2|0|0	0.03	-5.73	0.75	0.4
ARRDC4	STK26	4|1	5	2.5	2	3|0|0|2|0|0|1|0|0	0.06	-6.26	1.25	0.39
ARRDC4	ITPKC	3|3	6	3	2	0|0|0|0|0|0|0|0|0	0.99	5.25	30	0
ARRDC4	PKM	2|8	10	5	2	5|34|48|25|0|6|7|6|2	0	-148.65	0.14	0.69
ARRDC4	MLLT11	4|4	8	4	2	0|0|0|0|0|0|4|0|0	0.58	0.32	3	0.04
ARRDC4	TELO2	8|3	11	5.5	2	0|0|0|0|0|0|5|0|0	0.51	-1.51	3.3	0.06
ARRDC4	TUBB2A	210|182	392	196	2	89|208|146|163|93|231|329|215|48	0	-657.66	0.76	0.69
ARRDC4	TUBB2B	210|182	392	196	2	90|0|0|162|0|230|0|0|48	0	-302.57	1.22	0.69
ARRDC4	CEP170	2|4	6	3	2	1|2|0|6|3|7|13|3|11	0	-38.3	0.29	0.69
ARRDC4	TUBB	272|232	504	252	2	112|247|169|198|122|272|411|264|122	0	#NAME?	0.8	0.69
ARRDC4	SNX27	3|2	5	2.5	2	0|0|0|0|0|0|0|0|0	0.98	3.41	25	0
ARRDC4	HDAC2	3|1	4	2	2	0|0|0|0|0|0|3|0|0	0.28	-2.32	2	0.31
ARRDC4	RFC5	4|2	6	3	2	0|3|0|2|0|2|7|1|0	0	-11.96	0.75	0.56
ARRDC4	RFC3	0|3	3	1.5	2	0|0|0|0|0|0|3|0|0	0.28	-3.72	1.5	0.31
ARRDC4	RFC2	1|1	2	1	2	0|0|0|2|0|0|2|0|0	0	-4.03	0.75	0.69
ARRDC4	SH3BP4	1|2	3	1.5	2	0|0|0|0|0|0|0|0|0	0.48	1.38	15	0.18
ARRDC4	PGAM5	8|11	19	9.5	2	6|3|0|5|3|5|9|2|0	0	-12.59	1.43	0.56
ARRDC4	CNKSR3	3|3	6	3	2	2|0|0|0|0|2|7|0|0	0	-9.04	0.82	0.56
ARRDC4	FASTKD5	4|4	8	4	2	0|0|0|0|0|0|0|0|0	1	6.99	40	0
ARRDC4	FASTKD2	2|0	2	1	2	0|0|0|0|0|0|0|0|0	0.48	-1.13	10	0.18
ARRDC4	FASTKD1	4|7	11	5.5	2	0|0|0|0|0|2|2|0|0	0.79	0.37	4.12	0.02
ARRDC4	C1QBP	9|7	16	8	2	7|12|8|9|4|2|3|2|4	0	-24.85	0.83	0.65
ARRDC4	POLD3	0|3	3	1.5	2	0|0|0|0|0|0|0|0|0	0.5	-1.13	15	0.12
ARRDC4	RAB10	2|0	2	1	2	0|2|9|0|0|0|4|0|0	0	-21.05	0.2	0.62
ARRDC4	ACVR2A	4|3	7	3.5	2	0|0|0|0|0|0|0|0|0	1	5.25	35	0
ARRDC4	KLHL15	2|1	3	1.5	2	0|0|0|0|0|0|0|0|0	0.48	1.38	15	0.18
ARRDC4	PML	2|2	4	2	2	0|0|2|1|0|3|3|0|2	0	-7.22	0.75	0.52
ARRDC4	MTOR	3|5	8	4	2	0|0|0|5|0|3|3|0|0	0	-9.28	1.09	0.51
ARRDC4	LAMP2	1|1	2	1	2	0|0|0|1|0|1|1|0|0	0	-2.76	1	0.69
ARRDC4	IGF2BP1	7|7	14	7	2	4|8|10|10|4|8|13|9|3	0	-29.87	0.64	0.69
ARRDC4	IGF2BP3	16|12	28	14	2	2|7|7|9|3|7|5|4|3	0	-10.45	1.83	0.48
ARRDC4	IGF2BP2	0|2	2	1	2	0|0|0|6|0|2|5|0|0	0	-18.53	0.23	0.61
ARRDC4	RPL10A	2|0	2	1	2	2|4|10|2|4|1|4|0|0	0	-25.6	0.17	0.69
ARRDC4	USP8	5|2	7	3.5	2	0|0|0|0|0|0|0|0|0	0.98	3.41	35	0
ARRDC4	ERCC2	2|0	2	1	2	0|0|0|0|0|0|0|0|0	0.48	-1.13	10	0.18
ARRDC4	USP5	3|6	9	4.5	2	0|2|7|0|0|0|0|0|0	0.04	-6.28	1.5	0.4
ARRDC4	PFKP	11|13	24	12	2	13|21|14|21|12|26|52|35|13	0	-128.86	0.32	0.69
ARRDC4	PFKL	10|9	19	9.5	2	9|11|7|9|13|17|30|18|11	0	-67.8	0.44	0.69
ARRDC4	ABCB6	3|1	4	2	2	0|0|0|0|0|0|0|0|0	0.5	1.38	20	0.12
ARRDC4	MFSD3	1|1	2	1	2	0|0|0|0|0|0|0|0|0	0	1.38	10	0.69
ARRDC4	EEF1B2	2|3	5	2.5	2	0|4|6|3|0|1|2|1|0	0	-13.47	0.58	0.59
ARRDC4	CTNNA1	6|7	13	6.5	2	0|4|11|7|6|4|7|0|0	0	-21.55	0.78	0.64
ARRDC4	MTFR1L	3|3	6	3	2	5|7|2|3|5|9|14|8|2	0	-35.65	0.29	0.69
ARRDC4	TOM1	1|2	3	1.5	2	0|0|4|0|0|0|0|0|0	0.07	-3.51	1.12	0.38
ARRDC4	NOTCH1	2|0	2	1	2	0|0|0|0|0|0|0|0|0	0.48	-1.13	10	0.18
ARRDC4	NOTCH2	5|2	7	3.5	2	0|0|0|0|0|0|0|0|0	0.98	3.41	35	0
ARRDC4	NOTCH3	3|0	3	1.5	2	0|0|0|0|0|0|0|0|0	0.5	-1.13	15	0.12
ARRDC4	SSR1	7|8	15	7.5	2	4|4|7|4|8|6|7|5|1	0	-16.39	1.02	0.62
ARRDC4	SSR3	2|2	4	2	2	0|0|0|1|0|0|2|0|0	0.21	-1.31	2	0.32
ARRDC4	SSR4	8|6	14	7	2	2|7|7|3|2|3|8|6|2	0	-17.87	0.95	0.62
ARRDC4	NCDN	3|4	7	3.5	2	0|0|0|0|0|0|0|0|0	1	5.25	35	0
ARRDC4	MCU	1|1	2	1	2	1|2|0|1|3|3|2|2|2	0	-8.93	0.38	0.69
ARRDC4	NISCH	2|2	4	2	2	0|0|0|0|0|0|0|0|0	0.97	3.41	20	0.01
ARRDC4	MLEC	2|2	4	2	2	0|0|3|0|0|0|0|1|3	0	-6.03	0.86	0.49
ARRDC4	PRPF4B	2|0	2	1	2	0|2|1|0|0|0|0|0|1	0.04	-5.65	0.75	0.4
ARRDC4	MYL6	3|3	6	3	2	2|4|10|0|3|0|0|0|0	0	-16.45	0.53	0.63
ARRDC4	C7orf50	2|0	2	1	2	0|0|0|2|0|0|3|0|0	0.01	-7.05	0.6	0.43
ARRDC4	ATP2C1	0|2	2	1	2	0|0|0|0|0|0|0|0|0	0.48	-1.13	10	0.18
ARRDC4	SNRNP200	21|14	35	17.5	2	5|7|10|5|6|7|12|15|2	0	-23.86	1.42	0.62
ARRDC4	CERS5	2|0	2	1	2	0|0|0|0|0|0|0|0|0	0.48	-1.13	10	0.18
ARRDC4	CERS2	2|0	2	1	2	0|0|0|0|0|0|0|0|0	0.48	-1.13	10	0.18
ARRDC4	TFB2M	1|1	2	1	2	0|6|2|3|0|0|4|3|0	0	-15.66	0.23	0.69
ARRDC4	COX20	1|1	2	1	2	1|0|0|0|1|1|2|0|0	0	-3.96	0.75	0.69
ARRDC4	ZYG11B	1|2	3	1.5	2	3|4|0|4|2|5|11|6|0	0	-28.3	0.2	0.69
ARRDC4	HLA-DQB1	2|2	4	2	2	0|0|0|2|0|1|3|0|0	0.01	-4.84	1	0.46
ARRDC4	GUSB	1|1	2	1	2	0|0|0|0|0|0|0|0|0	0	1.38	10	0.69
ARRDC4	GPI	0|3	3	1.5	2	0|19|28|12|0|0|0|0|0	0	-86.3	0.08	0.69
ARRDC4	SLC25A22	4|2	6	3	2	0|0|0|2|0|2|9|0|0	0	-12.95	0.69	0.57
ARRDC4	SLC25A21	3|4	7	3.5	2	0|0|0|0|0|0|0|0|0	1	5.25	35	0
ARRDC4	SNRPD3	2|2	4	2	2	1|2|0|2|2|3|3|2|0	0	-7.22	0.75	0.52
ARRDC4	SNRPD2	0|2	2	1	2	0|2|2|1|2|0|3|2|0	0	-9.85	0.43	0.51
ARRDC4	SNRPD1	1|1	2	1	2	0|2|3|0|0|0|0|0|0	0	-5.14	0.6	0.69
ARRDC4	KIT	2|3	5	2.5	2	0|0|0|0|0|0|0|0|0	0.98	3.41	25	0
ARRDC4	HPS6	2|4	6	3	2	0|0|0|0|0|0|0|0|0	0.98	3.41	30	0
ARRDC4	KPNA2	9|6	15	7.5	2	7|13|14|12|11|14|18|9|14	0	-49.12	0.49	0.69
ARRDC4	NCAPG	0|2	2	1	2	0|0|0|0|0|0|0|0|0	0.48	-1.13	10	0.18
ARRDC4	MYO5A	2|0	2	1	2	0|0|0|0|0|0|0|0|0	0.48	-1.13	10	0.18
ARRDC4	COPB2	16|12	28	14	2	5|6|8|6|5|12|12|5|5	0	-20.88	1.31	0.62
ARRDC4	YME1L1	15|12	27	13.5	2	9|12|7|5|10|10|13|15|4	0	-30.3	1.01	0.66
ARRDC4	UNC119B	1|1	2	1	2	0|0|0|0|0|0|0|0|0	0	1.38	10	0.69
ARRDC4	SURF1	0|3	3	1.5	2	0|0|0|0|0|0|0|0|0	0.5	-1.13	15	0.12
ARRDC4	THADA	2|0	2	1	2	0|0|0|0|0|0|0|0|0	0.48	-1.13	10	0.18
ARRDC4	PGK1	0|3	3	1.5	2	0|12|21|11|0|0|2|1|0	0	-64.17	0.1	0.69
ARRDC4	TUBB6	121|112	233	116.5	2	38|97|77|65|43|107|160|109|47	0	-279.7	0.93	0.69
ARRDC4	TUBB3	80|79	159	79.5	2	42|0|47|0|0|98|115|78|0	0	-229	0.82	0.69
ARRDC4	GPR89B	1|1	2	1	2	0|0|0|0|0|0|0|0|0	0	1.38	10	0.69
ARRDC4	GPR89A	1|1	2	1	2	0|0|0|0|0|0|0|0|0	0	1.38	10	0.69
ARRDC4	RBFOX2	3|2	5	2.5	2	2|1|0|3|4|2|5|3|2	0	-12.14	0.62	0.58
ARRDC4	TNFRSF1A	2|2	4	2	2	0|0|0|0|0|0|0|0|0	0.97	3.41	20	0.01
ARRDC4	RPAP2	2|2	4	2	2	0|0|0|0|0|0|0|0|0	0.97	3.41	20	0.01
ARRDC4	RPAP3	5|6	11	5.5	2	0|0|0|3|0|0|0|0|0	0.84	1.45	5.5	0.02
ARRDC4	RPAP1	3|0	3	1.5	2	0|0|0|0|0|0|0|0|0	0.5	-1.13	15	0.12
ARRDC4	SOGA1	0|2	2	1	2	0|0|0|0|0|1|6|0|0	0	-9.29	0.43	0.49
ARRDC4	OXA1L	3|0	3	1.5	2	0|3|2|1|2|3|6|3|0	0	-17.03	0.38	0.58
ARRDC4	RHOT1	0|2	2	1	2	0|0|0|0|0|1|2|0|0	0.11	-4.17	1	0.36
ARRDC4	RHOT2	2|6	8	4	2	0|2|3|2|0|5|4|1|0	0	-12.14	1	0.51
ARRDC4	DNAAF5	3|6	9	4.5	2	0|2|0|2|0|1|2|2|0	0.34	-3.39	2.25	0.3
ARRDC4	SNX17	3|2	5	2.5	2	0|0|0|0|0|0|0|0|0	0.98	3.41	25	0
ARRDC4	STAT3	0|3	3	1.5	2	0|0|17|0|0|0|0|0|0	0	-23.21	0.26	0.62
ARRDC4	ADIPOR1	2|2	4	2	2	0|0|0|0|0|0|0|0|0	0.97	3.41	20	0.01
ARRDC4	DPM1	15|13	28	14	2	14|10|4|8|13|11|22|15|11	0	-42.14	0.82	0.67
ARRDC4	NDUFA13	9|5	14	7	2	2|8|5|2|4|3|5|6|1	0	-15.8	1.11	0.58
ARRDC4	OCLN	3|1	4	2	2	0|0|0|0|0|0|0|0|0	0.5	1.38	20	0.12
ARRDC4	LRP1	0|2	2	1	2	0|2|1|0|0|0|0|3|0	0	-8.36	0.5	0.47
ARRDC4	LRP6	0|2	2	1	2	0|0|0|0|0|0|0|0|0	0.48	-1.13	10	0.18
ARRDC4	CDS2	1|2	3	1.5	2	0|0|0|0|0|0|0|0|0	0.48	1.38	15	0.18
ARRDC4	PBDC1	2|2	4	2	2	3|0|2|0|0|0|0|4|0	0	-8.34	0.67	0.54
ARRDC4	ASNS	1|2	3	1.5	2	0|0|0|0|0|0|0|0|0	0.48	1.38	15	0.18
ARRDC4	TBC1D9B	3|4	7	3.5	2	0|0|0|0|0|0|0|0|0	1	5.25	35	0
ARRDC4	WDR11	2|2	4	2	2	0|0|0|0|0|0|0|0|0	0.97	3.41	20	0.01
ARRDC4	WDR18	2|3	5	2.5	2	0|0|0|0|0|0|0|0|0	0.98	3.41	25	0
ARRDC4	PDE4D	0|3	3	1.5	2	0|0|0|0|0|0|0|0|0	0.5	-1.13	15	0.12
ARRDC4	PPP2R1A	3|2	5	2.5	2	0|8|10|2|0|0|4|0|0	0	-25.64	0.34	0.65
ARRDC4	MAP4K4	0|2	2	1	2	0|0|0|0|0|0|0|0|0	0.48	-1.13	10	0.18
ARRDC4	KIRREL	0|3	3	1.5	2	0|0|0|0|0|0|0|0|0	0.5	-1.13	15	0.12
ARRDC4	USP9X	18|12	30	15	2	0|6|4|10|0|12|19|2|5	0	-31.37	1.1	0.65
ARRDC4	MAP7	3|5	8	4	2	4|1|0|3|6|2|3|3|8	0	-18.02	0.67	0.62
ARRDC4	PTPN23	5|8	13	6.5	2	0|0|0|0|0|0|0|0|0	1	8.67	65	0
ARRDC4	NEFM	15|10	25	12.5	2	5|0|0|3|13|5|4|0|5	0	-12.9	1.63	0.53
ARRDC4	NEFL	14|14	28	14	2	5|0|0|4|13|5|6|0|4	0	-9.12	1.75	0.56
ARRDC4	NET1	1|1	2	1	2	0|0|0|0|0|0|0|0|0	0	1.38	10	0.69
ARRDC4	HSPB1	13|7	20	10	2	5|3|71|11|4|18|41|5|4	0	-163.87	0.23	0.69
ARRDC4	PKN3	13|8	21	10.5	2	5|0|0|0|3|0|0|0|0	0.75	0.16	3.94	0.02
ARRDC4	SUCLG1	2|0	2	1	2	0|0|0|0|0|0|0|0|0	0.48	-1.13	10	0.18
ARRDC4	ALDOA	0|3	3	1.5	2	0|10|27|8|0|0|2|0|0	0	-65	0.1	0.69
ARRDC4	CAND1	0|3	3	1.5	2	0|9|14|6|0|0|1|0|0	0	-41.99	0.16	0.69
ARRDC4	CYC1	2|4	6	3	2	0|4|2|0|2|0|0|3|0	0	-8.34	1	0.49
ARRDC4	ABCC1	3|3	6	3	2	0|0|0|0|0|0|0|0|0	0.99	5.25	30	0
ARRDC4	CKAP4	0|3	3	1.5	2	0|17|20|10|0|6|3|0|0	0	-68.74	0.1	0.69
ARRDC4	ERBB2IP	13|7	20	10	2	8|4|0|4|14|12|15|9|18	0	-48.26	0.64	0.67
ARRDC4	TMOD3	5|3	8	4	2	2|0|0|0|6|0|0|0|0	0.04	-5.18	1.5	0.4
ARRDC4	BAG3	6|6	12	6	2	2|4|2|7|2|8|21|4|0	0	-34.98	0.5	0.67
ARRDC4	NME1-NME2	6|0	6	3	2	0|10|4|3|0|1|4|1|0	0	-25.6	0.5	0.61
ARRDC4	DHCR7	4|3	7	3.5	2	2|3|2|1|2|3|4|5|1	0	-10.42	0.88	0.56
ARRDC4	AFG3L2	8|10	18	9	2	6|6|4|7|3|9|10|11|5	0	-24.42	0.9	0.65
ARRDC4	SCO2	4|4	8	4	2	0|3|0|0|0|3|4|0|1	0	-6.63	1.2	0.5
ARRDC4	PBXIP1	1|3	4	2	2	0|0|0|0|0|0|0|4|0	0.18	-3.51	1.5	0.33
ARRDC4	TROVE2	2|1	3	1.5	2	0|4|4|3|0|3|5|3|0	0	-15.66	0.35	0.69
ARRDC4	GSN	4|3	7	3.5	2	0|0|22|0|0|0|0|0|0	0	-21.94	0.48	0.64
ARRDC4	RFTN1	2|0	2	1	2	0|0|0|0|0|0|0|0|0	0.48	-1.13	10	0.18
ARRDC4	GNB2L1	3|3	6	3	2	0|5|9|9|0|9|7|5|6	0	-30.11	0.33	0.69
ARRDC4	SCAMP3	0|3	3	1.5	2	0|2|4|3|0|2|1|0|0	0	-12.67	0.5	0.52
ARRDC4	HK1	5|4	9	4.5	2	0|2|8|7|0|3|5|0|0	0	-18.75	0.67	0.63
ARRDC4	ATP2B1	8|0	8	4	2	0|0|0|0|0|0|0|0|0	0.5	-1.13	40	0.07
ARRDC4	GIPC1	2|1	3	1.5	2	0|2|4|0|0|0|0|0|0	0	-6.02	0.75	0.47
ARRDC4	ATP2B4	0|5	5	2.5	2	0|0|0|2|0|0|2|0|0	0.44	-5.73	1.88	0.29
ARRDC4	CSNK2A1	2|0	2	1	2	0|2|2|0|0|0|0|0|0	0.03	-5.73	0.75	0.4
ARRDC4	RPS7	1|2	3	1.5	2	0|4|10|2|0|0|2|2|2	0	-19.39	0.28	0.69
ARRDC4	SERAC1	0|3	3	1.5	2	0|0|0|0|0|0|0|0|0	0.5	-1.13	15	0.12
ARRDC4	KDM5C	6|0	6	3	2	0|0|0|0|0|0|0|0|0	0.5	-1.13	30	0.08
ARRDC4	PABPC1	6|0	6	3	2	0|17|18|16|7|13|22|9|11	0	-83.77	0.16	0.69
ARRDC4	MACF1	3|1	4	2	2	0|0|11|0|0|0|0|0|0	0	-12	0.55	0.56
ARRDC4	PABPC4	0|3	3	1.5	2	5|9|9|6|4|8|10|6|5	0	-40.64	0.16	0.69
ARRDC4	SLC25A35	1|1	2	1	2	0|0|0|0|0|0|0|0|0	0	1.38	10	0.69
ARRDC4	PREX1	2|0	2	1	2	0|0|0|0|0|0|0|0|0	0.48	-1.13	10	0.18
ARRDC4	TUBA1C	186|0	186	93	2	29|0|0|0|0|0|0|0|15	0.5	-63.23	6.34	0.08
ARRDC4	TUBA1B	0|124	124	62	2	15|73|0|65|72|102|0|90|7	0	-394.68	0.7	0.69
ARRDC4	TUBA1A	182|120	302	151	2	0|68|71|0|0|0|133|0|15	0	-148.65	1.67	0.68
ARRDC4	PIK3R2	13|13	26	13	2	0|3|2|0|3|2|6|6|0	0.45	-0.22	2.6	0.29
ARRDC4	PIK3R1	3|3	6	3	2	0|0|0|1|0|0|2|0|0	0.5	0.01	3	0.06
ARRDC4	ZNF281	0|2	2	1	2	0|0|0|0|0|0|6|0|0	0.01	-7.57	0.5	0.45
ARRDC4	STT3A	6|3	9	4.5	2	0|3|4|4|0|5|4|6|0	0	-14.15	0.9	0.57
ARRDC4	TUBAL3	23|0	23	11.5	2	0|0|0|0|0|0|0|0|0	0.5	-1.13	115	0.07
ARRDC4	FAM8A1	3|0	3	1.5	2	0|0|0|0|0|0|0|0|0	0.5	-1.13	15	0.12
ARRDC4	RAD23B	2|0	2	1	2	0|2|3|3|0|0|0|0|0	0	-11.31	0.38	0.53
ARRDC4	STOM	3|3	6	3	2	0|0|0|0|0|0|0|0|0	0.99	5.25	30	0
ARRDC4	LRRCC1	2|2	4	2	2	0|0|0|0|0|0|0|0|0	0.97	3.41	20	0.01
ARRDC4	AKAP8L	3|2	5	2.5	2	2|0|0|0|0|0|0|0|0	0.61	0.04	3.75	0.04
ARRDC4	HNRNPU	2|3	5	2.5	2	0|9|18|8|3|1|3|3|9	0	-45.11	0.21	0.69
ARRDC4	POLD1	4|3	7	3.5	2	3|0|0|5|0|4|5|0|0	0	-12.94	0.75	0.59
ARRDC4	HNRNPK	4|5	9	4.5	2	1|12|19|12|1|4|6|2|2	0	-49.85	0.31	0.69
ARRDC4	FASN	13|14	27	13.5	2	0|32|37|26|0|3|6|3|0	0	-99.8	0.43	0.68
ARRDC4	HNRNPM	15|7	22	11	2	2|7|7|24|11|26|28|9|6	0	-90.97	0.42	0.68
ARRDC4	PDCD6	2|2	4	2	2	0|3|0|0|2|0|0|2|0	0	-6.03	0.86	0.49
ARRDC4	TCF25	2|1	3	1.5	2	0|2|0|3|0|4|9|6|0	0	-24.09	0.24	0.69
ARRDC4	HNRNPC	8|10	18	9	2	5|2|13|10|15|9|11|2|2	0	-35.72	0.69	0.67
ARRDC4	HNRNPF	13|10	23	11.5	2	2|13|7|3|9|4|11|13|3	0	-29.78	0.93	0.65
ARRDC4	ARL6IP6	0|2	2	1	2	0|0|0|0|0|0|0|0|0	0.48	-1.13	10	0.18
ARRDC4	ARL6IP4	2|1	3	1.5	2	3|5|1|3|2|3|4|3|4	0	-15.66	0.35	0.69
ARRDC4	HMGA2	1|3	4	2	2	0|0|2|0|0|0|0|0|2	0.12	-4.03	1.5	0.35
ARRDC4	HMGA1	3|6	9	4.5	2	0|0|0|0|4|0|0|0|0	0.58	-0.57	3.38	0.04
ARRDC4	ARFGEF1	2|3	5	2.5	2	0|0|0|0|0|0|0|0|0	0.98	3.41	25	0
ARRDC4	GCAT	2|0	2	1	2	0|0|0|0|0|0|0|0|0	0.48	-1.13	10	0.18
ARRDC4	STAU1	7|5	12	6	2	2|1|0|8|3|5|14|2|4	0	-25.55	0.67	0.65
ARRDC4	DICER1	2|3	5	2.5	2	0|0|0|0|0|0|0|0|0	0.98	3.41	25	0
ARRDC4	GLUD1	10|11	21	10.5	2	1|2|7|2|2|2|9|2|0	0	-7.48	1.75	0.51
ARRDC4	HSP90AA1	125|104	229	114.5	2	10|49|67|46|10|20|32|15|7	0	-50.48	2.12	0.66
ARRDC4	TIMM23	12|2	14	7	2	1|0|0|0|1|2|2|0|0	0.51	-3.65	4.2	0.06
ARRDC4	TIMM21	4|3	7	3.5	2	1|1|1|2|3|2|2|5|2	0	-8.09	1.05	0.52
ARRDC4	KARS	4|3	7	3.5	2	0|4|6|0|0|0|0|0|0	0	-7.72	1.05	0.51
ARRDC4	HP1BP3	1|2	3	1.5	2	0|0|0|0|3|0|0|0|0	0.15	-2.32	1.5	0.34
ARRDC4	SSRP1	0|3	3	1.5	2	0|0|0|0|0|0|0|0|0	0.5	-1.13	15	0.12
ARRDC4	HAX1	11|7	18	9	2	3|5|7|3|6|8|9|10|4	0	-22.35	1	0.63
ARRDC4	RAB34	3|3	6	3	2	3|2|2|4|1|0|4|3|3	0	-9.28	0.82	0.56
ARRDC4	TAF6L	14|15	29	14.5	2	4|1|0|6|5|8|11|4|9	0	-13.42	1.55	0.6
ARRDC4	YWHAQ	14|22	36	18	2	4|6|15|6|6|4|6|2|2	0.01	-12.25	2	0.46
ARRDC4	RAB38	2|0	2	1	2	0|0|0|0|0|0|0|0|0	0.48	-1.13	10	0.18
ARRDC4	LDHA	4|6	10	5	2	0|14|17|7|3|5|3|3|0	0	-42.63	0.39	0.67
ARRDC4	LDHB	4|8	12	6	2	2|13|16|22|1|7|8|3|0	0	-61.04	0.35	0.69
ARRDC4	PDIA6	2|3	5	2.5	2	3|12|15|6|0|3|2|0|0	0	-40.91	0.23	0.69
ARRDC4	C1orf198	0|2	2	1	2	0|0|0|0|0|0|0|0|0	0.48	-1.13	10	0.18
ARRDC4	CFL1	0|2	2	1	2	0|5|8|5|0|0|1|1|0	0	-25.84	0.17	0.69
ARRDC4	ARMC6	1|3	4	2	2	0|0|0|0|0|0|0|0|0	0.5	1.38	20	0.12
ARRDC4	PLAA	1|2	3	1.5	2	3|0|0|0|0|0|0|0|0	0.15	-2.32	1.5	0.34
ARRDC4	C2orf47	2|3	5	2.5	2	0|3|0|1|0|2|5|3|2	0	-10.91	0.68	0.56
ARRDC4	SEC22B	1|2	3	1.5	2	0|0|0|2|0|1|4|0|0	0	-7.6	0.64	0.51
ARRDC4	SERPINH1	6|5	11	5.5	2	5|4|6|5|3|2|4|4|2	0	-12.24	1.03	0.58
ARRDC4	SPATA5	0|3	3	1.5	2	0|0|0|3|0|0|4|0|0	0.01	-9.68	0.64	0.46
ARRDC5	HSPA2	30|30	60	30	2	0|24|24|26|0|23|31|25|0	0	-53.53	1.1	0.68
ARRDC5	HIST1H4A	1|4	5	2.5	2	4|2|23|5|8|2|5|1|2	0	-47.69	0.21	0.69
ARRDC5	AGK	5|0	5	2.5	2	4|5|5|2|4|2|6|8|3	0	-27.34	0.39	0.63
ARRDC5	HSPA5	70|60	130	65	2	14|35|67|33|20|32|43|25|19	0	-84.18	1.34	0.68
ARRDC5	HSPA4	5|0	5	2.5	2	0|9|14|11|0|0|0|0|0	0	-49.54	0.22	0.67
ARRDC5	HSPA9	59|52	111	55.5	2	16|35|33|25|17|24|38|27|17	0	-50.36	1.57	0.67
ARRDC5	HSPA8	124|102	226	113	2	39|73|74|72|36|76|95|61|52	0	-141.29	1.38	0.69
ARRDC5	SSFA2	0|2	2	1	2	0|0|0|0|2|0|0|0|0	0.26	-3.3	1.5	0.32
ARRDC5	CS	2|0	2	1	2	0|3|5|3|0|0|0|0|0	0	-15.64	0.27	0.59
ARRDC5	LIFR	3|2	5	2.5	2	0|0|0|0|0|0|0|0|0	0.98	3.41	25	0
ARRDC5	MZT2B	0|5	5	2.5	2	0|0|0|0|0|0|0|0|0	0.5	-1.13	25	0.08
ARRDC5	UCHL1	2|0	2	1	2	0|5|0|0|0|0|0|0|0	0.03	-6.68	0.6	0.41
ARRDC5	ZC3H14	2|0	2	1	2	7|0|0|0|1|0|0|0|0	0	-10.76	0.38	0.52
ARRDC5	TMEM59	3|0	3	1.5	2	0|0|0|0|0|0|0|0|0	0.5	-1.13	15	0.12
ARRDC5	ZC3H18	2|0	2	1	2	0|0|0|0|0|0|0|0|0	0.48	-1.13	10	0.18
ARRDC5	DHX9	11|7	18	9	2	3|9|11|5|5|3|11|3|3	0	-27.35	0.87	0.65
ARRDC5	TCOF1	7|4	11	5.5	2	6|0|1|8|6|7|9|3|8	0	-25.25	0.66	0.64
ARRDC5	NUP98	2|4	6	3	2	0|2|0|0|0|4|4|6|0	0	-14.8	0.64	0.59
ARRDC5	SP1	0|2	2	1	2	0|0|0|0|3|0|0|0|0	0.15	-3.72	1	0.34
ARRDC5	NUP93	8|12	20	10	2	4|9|2|11|2|13|12|13|3	0	-34.45	0.79	0.66
ARRDC5	OPA1	3|2	5	2.5	2	0|0|0|4|0|3|9|0|0	0	-17.24	0.47	0.62
ARRDC5	GK	5|5	10	5	2	0|0|0|0|0|0|0|0|0	1	8.67	50	0
ARRDC5	HNRNPDL	3|0	3	1.5	2	0|0|0|2|0|2|2|0|0	0.02	-8.36	0.75	0.43
ARRDC5	TRAPPC5	1|1	2	1	2	0|0|0|0|0|0|0|0|0	0	1.38	10	0.69
ARRDC5	ACLY	5|0	5	2.5	2	0|10|12|11|0|0|2|0|0	0	-48.04	0.23	0.67
ARRDC5	TSG101	0|3	3	1.5	2	0|0|0|0|0|0|0|0|0	0.5	-1.13	15	0.12
ARRDC5	UGCG	3|0	3	1.5	2	0|0|0|0|0|0|0|0|0	0.5	-1.13	15	0.12
ARRDC5	ATP2A2	29|16	45	22.5	2	13|13|19|10|10|12|20|24|3	0	-51.96	1.07	0.67
ARRDC5	HACL1	1|2	3	1.5	2	0|0|0|0|0|0|0|0|0	0.48	1.38	15	0.18
ARRDC5	GTF3C3	2|3	5	2.5	2	0|0|0|0|0|0|0|0|0	0.98	3.41	25	0
ARRDC5	MGST3	1|1	2	1	2	0|0|0|0|0|0|0|0|0	0	1.38	10	0.69
ARRDC5	DENND4A	2|0	2	1	2	0|0|0|0|0|0|0|0|0	0.48	-1.13	10	0.18
ARRDC5	XPO1	22|14	36	18	2	4|14|10|6|4|8|18|11|0	0	-30.9	1.26	0.64
ARRDC5	XPO5	3|3	6	3	2	0|4|4|0|0|1|2|2|0	0	-8.09	0.9	0.54
ARRDC5	TTK	2|0	2	1	2	1|0|0|0|2|0|0|0|0	0.11	-4.17	1	0.36
ARRDC5	LSR	5|2	7	3.5	2	0|0|0|0|0|0|0|0|0	0.98	3.41	35	0
ARRDC5	TTN	3|0	3	1.5	2	3|0|0|0|0|0|0|0|0	0.28	-3.72	1.5	0.31
ARRDC5	XPOT	2|2	4	2	2	3|0|0|0|2|2|2|0|0	0	-6.03	0.86	0.49
ARRDC5	TFB2M	2|3	5	2.5	2	0|6|2|3|0|0|4|3|0	0	-13.47	0.58	0.6
ARRDC5	GART	4|0	4	2	2	0|6|11|6|0|0|1|0|0	0	-33.3	0.26	0.65
ARRDC5	GARS	4|0	4	2	2	0|6|7|0|0|0|0|0|0	0	-18.07	0.46	0.57
ARRDC5	ZEB2	2|0	2	1	2	0|2|3|0|4|0|0|5|0	0	-17.03	0.25	0.6
ARRDC5	PISD	3|3	6	3	2	2|0|0|0|2|0|4|0|0	0	-5.73	1.12	0.48
ARRDC5	PSMD13	2|0	2	1	2	0|3|4|0|0|0|0|0|0	0	-9.68	0.43	0.5
ARRDC5	TCIRG1	7|4	11	5.5	2	0|0|0|0|0|0|0|0|0	1	6.99	55	0
ARRDC5	DLAT	2|0	2	1	2	0|3|4|3|0|0|0|0|0	0	-14.17	0.3	0.57
ARRDC5	SERBP1	4|0	4	2	2	0|4|6|3|0|0|1|0|2	0	-18.53	0.46	0.58
ARRDC5	TMEM199	6|5	11	5.5	2	0|0|0|0|0|0|0|0|0	1	8.67	55	0
ARRDC5	FOXC1	1|2	3	1.5	2	0|0|0|0|0|0|0|0|0	0.48	1.38	15	0.18
ARRDC5	GANAB	8|0	8	4	2	0|15|15|3|0|0|4|5|0	0	-50.64	0.34	0.66
ARRDC5	NUP133	12|8	20	10	2	3|5|0|4|3|7|14|8|2	0	-23.14	1.03	0.63
ARRDC5	VAPA	3|1	4	2	2	0|6|7|0|0|0|0|3|0	0	-19.85	0.38	0.62
ARRDC5	SMAD3	1|2	3	1.5	2	0|0|0|0|0|0|0|0|0	0.48	1.38	15	0.18
ARRDC5	NDUFAF4	3|4	7	3.5	2	0|7|2|1|0|3|8|5|2	0	-20.69	0.53	0.64
ARRDC5	NDUFAF3	8|7	15	7.5	2	6|4|2|4|1|6|3|6|0	0	-11.68	1.25	0.58
ARRDC5	TELO2	6|0	6	3	2	0|0|0|0|0|0|5|0|0	0.36	-6.68	1.8	0.3
ARRDC5	CYFIP1	3|0	3	1.5	2	0|0|0|0|0|0|0|0|0	0.5	-1.13	15	0.12
ARRDC5	IGF2R	3|2	5	2.5	2	0|0|0|0|0|0|0|0|0	0.98	3.41	25	0
ARRDC5	ARF3	2|0	2	1	2	0|3|3|3|0|2|0|0|0	0	-12.67	0.33	0.55
ARRDC5	ARF1	2|0	2	1	2	0|3|3|2|0|1|0|0|0	0	-11.31	0.38	0.53
ARRDC5	SARM1	1|2	3	1.5	2	0|0|0|0|0|0|0|0|0	0.48	1.38	15	0.18
ARRDC5	SPTLC1	3|0	3	1.5	2	0|0|0|0|0|0|0|0|0	0.5	-1.13	15	0.12
ARRDC5	COX4I1	2|0	2	1	2	0|4|5|0|0|0|0|0|0	0	-12.35	0.33	0.55
ARRDC5	PRKAR1A	6|5	11	5.5	2	0|5|3|0|0|3|2|4|0	0	-7.54	1.38	0.5
ARRDC5	SAR1B	1|1	2	1	2	0|0|0|0|0|0|0|0|0	0	1.38	10	0.69
ARRDC5	CCDC115	5|9	14	7	2	0|0|0|0|0|0|0|0|0	1	8.67	70	0
ARRDC5	SENP1	0|3	3	1.5	2	2|0|0|1|2|2|4|0|0	0	-11.31	0.56	0.5
ARRDC5	ATP1A1	70|68	138	69	2	7|10|6|19|4|13|16|7|5	1	31.2	4.31	0
ARRDC5	CDC42	3|0	3	1.5	2	0|4|5|0|0|0|0|3|0	0	-17.03	0.38	0.58
ARRDC5	CPEB4	6|4	10	5	2	0|2|0|2|0|2|13|5|5	0	-22.26	0.65	0.64
ARRDC5	HMGB1	3|0	3	1.5	2	0|4|4|3|0|0|0|0|0	0	-15.64	0.41	0.57
ARRDC5	CHP1	3|5	8	4	2	0|2|3|1|0|3|5|0|0	0	-9.28	1.09	0.51
ARRDC5	CPEB2	3|0	3	1.5	2	0|0|0|0|0|0|0|0|0	0.5	-1.13	15	0.12
ARRDC5	SPNS1	2|0	2	1	2	0|0|0|0|0|0|3|0|0	0.15	-3.72	1	0.34
ARRDC5	FBRS	3|3	6	3	2	0|0|0|0|0|0|0|0|0	0.99	5.25	30	0
ARRDC5	PIPSL	2|0	2	1	2	0|0|0|0|0|0|0|0|0	0.48	-1.13	10	0.18
ARRDC5	ENSG00000254692	0|4	4	2	2	0|0|0|0|0|0|0|0|0	0.5	-1.13	20	0.09
ARRDC5	TIMM50	19|21	40	20	2	5|18|12|15|16|13|22|18|15	0	-41.27	1.03	0.67
ARRDC5	DHRS7B	8|15	23	11.5	2	5|11|4|4|9|7|15|11|8	0	-33.17	0.93	0.65
ARRDC5	FGFR1OP	1|2	3	1.5	2	0|0|0|0|2|0|4|0|0	0	-6.02	0.75	0.47
ARRDC5	VMA21	3|4	7	3.5	2	0|0|0|0|0|0|0|0|0	1	5.25	35	0
ARRDC5	SNW1	5|0	5	2.5	2	1|1|0|4|2|0|0|3|0	0.01	-12.67	0.83	0.45
ARRDC5	PNP	3|0	3	1.5	2	0|1|8|3|0|0|0|0|0	0	-16.55	0.38	0.58
ARRDC5	CALR	10|0	10	5	2	0|15|21|5|0|0|3|0|0	0	-59.31	0.37	0.67
ARRDC5	CALU	28|9	37	18.5	2	13|13|4|6|10|9|19|16|2	0	-45.47	1.16	0.63
ARRDC5	FAR1	7|5	12	6	2	5|4|5|7|7|8|14|14|7	0	-37.8	0.5	0.69
ARRDC5	FAR2	3|4	7	3.5	2	4|1|0|0|4|2|4|3|2	0	-10.42	0.88	0.56
ARRDC5	CHPF	0|2	2	1	2	0|0|0|2|0|0|2|0|0	0.03	-5.73	0.75	0.4
ARRDC5	EWSR1	4|0	4	2	2	0|2|3|4|0|0|1|0|0	0	-12.67	0.67	0.49
ARRDC5	RPN1	15|8	23	11.5	2	4|12|14|9|4|7|10|10|3	0	-31.89	0.96	0.65
ARRDC5	AAAS	4|3	7	3.5	2	0|0|0|2|0|4|2|0|0	0.01	-5.73	1.31	0.46
ARRDC5	SYTL2	2|0	2	1	2	0|0|0|0|0|0|0|0|0	0.48	-1.13	10	0.18
ARRDC5	PRPF8	18|10	28	14	2	5|10|7|6|8|2|9|13|3	0	-23.78	1.31	0.6
ARRDC5	EFNB1	0|2	2	1	2	0|0|0|0|0|0|0|0|0	0.48	-1.13	10	0.18
ARRDC5	PRPF4	0|2	2	1	2	0|2|1|0|0|0|0|1|0	0.04	-5.65	0.75	0.4
ARRDC5	PLEKHH3	7|5	12	6	2	2|0|0|4|0|5|8|0|0	0	-13.42	1.06	0.58
ARRDC5	SLC47A1	1|2	3	1.5	2	0|0|6|0|0|0|0|2|3	0	-12.95	0.41	0.59
ARRDC5	HDGF	2|0	2	1	2	0|0|5|0|0|0|0|0|0	0.03	-6.68	0.6	0.41
ARRDC5	MRPL37	2|4	6	3	2	3|3|3|4|2|3|3|3|4	0	-10.91	0.82	0.54
ARRDC5	DBI	2|0	2	1	2	0|0|6|0|0|0|0|0|0	0.01	-7.57	0.5	0.45
ARRDC5	KIAA0930	2|1	3	1.5	2	0|0|0|0|0|2|2|0|0	0.03	-4.03	1.12	0.4
ARRDC5	RCOR1	3|1	4	2	2	0|0|0|0|0|0|0|0|0	0.5	1.38	20	0.12
ARRDC5	APC	0|2	2	1	2	0|0|0|0|0|0|0|0|0	0.48	-1.13	10	0.18
ARRDC5	UQCRC2	12|8	20	10	2	7|11|15|8|12|6|17|12|3	0	-42.22	0.68	0.67
ARRDC5	XPNPEP1	2|0	2	1	2	0|0|4|0|0|0|0|0|0	0.07	-5.2	0.75	0.38
ARRDC5	TMEM43	14|4	18	9	2	0|1|3|0|0|0|0|0|0	0.76	0.11	6.75	0.02
ARRDC5	XPNPEP3	3|2	5	2.5	2	0|0|0|0|0|4|3|0|0	0.01	-5.85	1.07	0.46
ARRDC5	NUP88	12|7	19	9.5	2	0|14|4|7|0|13|21|18|3	0	-56.36	0.54	0.68
ARRDC5	FOXP1	0|2	2	1	2	0|0|0|0|0|0|0|0|0	0.48	-1.13	10	0.18
ARRDC5	FOXP4	3|3	6	3	2	0|0|0|0|0|0|0|0|0	0.99	5.25	30	0
ARRDC5	NUP85	4|0	4	2	2	0|0|0|1|0|0|2|0|0	0.39	-4.17	2	0.3
ARRDC5	NUBPL	4|0	4	2	2	0|0|0|3|0|3|4|0|0	0	-14.17	0.6	0.52
ARRDC5	YTHDF2	2|3	5	2.5	2	0|2|1|1|0|3|6|1|1	0	-10.93	0.68	0.57
ARRDC5	SUB1	2|0	2	1	2	0|0|0|3|0|2|2|0|0	0	-9.85	0.43	0.51
ARRDC5	TKT	7|0	7	3.5	2	0|9|20|11|0|0|0|0|0	0	-58.1	0.26	0.67
ARRDC5	SDF2L1	19|7	26	13	2	3|14|6|5|3|9|41|16|4	0	-80.18	0.55	0.68
ARRDC5	PPP1R9B	0|3	3	1.5	2	1|0|0|0|3|0|0|0|0	0.14	-5.53	1.12	0.35
ARRDC5	TARS2	7|8	15	7.5	2	5|5|2|5|1|8|9|9|0	0	-21.16	0.87	0.64
ARRDC5	DPYSL2	2|0	2	1	2	0|4|3|0|0|0|0|0|0	0	-9.68	0.43	0.5
ARRDC5	DLD	4|0	4	2	2	0|3|2|5|0|0|0|0|0	0	-14.17	0.6	0.52
ARRDC5	NUDT5	3|0	3	1.5	2	0|3|4|3|0|0|0|0|0	0	-14.17	0.45	0.55
ARRDC5	LARS	5|1	6	3	2	0|6|10|7|0|0|2|0|0	0	-29.81	0.39	0.64
ARRDC5	GJA1	1|1	2	1	2	0|0|0|0|0|0|0|0|0	0	1.38	10	0.69
ARRDC5	HNRNPH2	7|6	13	6.5	2	0|6|11|0|0|0|4|4|0	0	-16.44	0.93	0.62
ARRDC5	PFN1	8|0	8	4	2	0|12|19|13|0|0|3|0|0	0	-64.41	0.27	0.67
ARRDC5	RPL17-C18orf32	1|1	2	1	2	0|0|0|2|0|1|2|0|0	0	-5.16	0.6	0.69
ARRDC5	TRIM5	2|2	4	2	2	0|0|0|0|0|0|0|0|0	0.97	3.41	20	0.01
ARRDC5	TRIM4	6|7	13	6.5	2	2|3|0|0|1|0|0|3|1	0.3	-1.59	2.44	0.31
ARRDC5	SSB	9|0	9	4.5	2	0|9|8|6|0|0|5|0|0	0	-33.25	0.59	0.62
ARRDC5	MDN1	4|7	11	5.5	2	0|0|0|2|0|5|9|4|0	0	-16.22	0.92	0.6
ARRDC5	ANKRD13A	0|4	4	2	2	0|0|0|0|0|0|0|0|0	0.5	-1.13	20	0.09
ARRDC5	RPLP2	22|29	51	25.5	2	9|18|22|15|9|15|25|12|12	0	-45.14	1.18	0.67
ARRDC5	RPLP1	3|4	7	3.5	2	0|3|3|2|0|1|5|2|2	0	-9.28	0.95	0.54
ARRDC5	RPLP0	14|16	30	15	2	8|9|13|10|9|14|17|6|9	0	-32.08	1.02	0.66
ARRDC5	PRKAR2A	2|1	3	1.5	2	0|2|3|0|0|0|0|0|0	0.01	-5.14	0.9	0.43
ARRDC5	PPA1	4|0	4	2	2	0|7|6|5|0|0|2|0|0	0	-25.84	0.33	0.63
ARRDC5	MLF2	2|1	3	1.5	2	0|0|0|0|0|0|0|0|0	0.48	1.38	15	0.18
ARRDC5	NUP62	8|3	11	5.5	2	2|7|0|3|2|3|11|9|2	0	-30.11	0.61	0.64
ARRDC5	TPM4	3|0	3	1.5	2	0|5|26|4|0|0|0|0|0	0	-49.9	0.13	0.69
ARRDC5	TPM3	5|0	5	2.5	2	0|6|25|0|0|0|0|0|0	0	-43.82	0.24	0.66
ARRDC5	SNRPA1	5|6	11	5.5	2	0|2|3|4|2|2|3|4|0	0	-6.37	1.5	0.47
ARRDC5	ETF1	2|0	2	1	2	0|4|5|0|0|0|0|0|0	0	-12.35	0.33	0.55
ARRDC5	ALDH3A2	4|6	10	5	2	3|5|7|5|2|3|5|3|4	0	-14.98	0.88	0.6
ARRDC5	FBXW5	7|5	12	6	2	0|5|2|3|0|5|13|7|4	0	-23.06	0.72	0.64
ARRDC5	ETFA	4|2	6	3	2	1|4|8|7|3|2|3|3|0	0	-21.52	0.47	0.63
ARRDC5	PLPP3	4|5	9	4.5	2	0|0|0|0|0|0|0|0|0	1	6.99	45	0
ARRDC5	PLPP2	1|2	3	1.5	2	0|0|0|0|0|0|0|0|0	0.48	1.38	15	0.18
ARRDC5	NUP107	5|4	9	4.5	2	0|3|1|3|2|7|11|3|3	0	-19.7	0.64	0.63
ARRDC5	HNRNPAB	2|1	3	1.5	2	0|0|0|0|0|0|0|0|0	0.48	1.38	15	0.18
ARRDC5	RPS4X	15|7	22	11	2	4|16|13|11|9|10|14|8|11	0	-42.92	0.77	0.66
ARRDC5	ATXN2L	3|0	3	1.5	2	0|3|2|0|0|3|1|0|5	0	-15.64	0.41	0.57
ARRDC5	DLST	5|3	8	4	2	0|0|4|3|0|0|0|0|0	0.08	-4.33	1.71	0.37
ARRDC5	TCP1	9|6	15	7.5	2	0|17|15|9|0|4|6|5|3	0	-42.35	0.55	0.67
ARRDC5	TCEB2	2|0	2	1	2	0|0|0|2|0|3|5|0|0	0	-14.17	0.3	0.57
ARRDC5	TCEB1	0|2	2	1	2	0|0|0|0|3|3|5|0|0	0	-15.64	0.27	0.59
ARRDC5	PRDX4	5|1	6	3	2	0|9|11|7|0|3|2|0|0	0	-35.54	0.33	0.66
ARRDC5	PRDX3	4|1	5	2.5	2	0|6|6|6|0|0|0|0|0	0	-22.64	0.42	0.63
ARRDC5	PRDX2	8|0	8	4	2	0|10|11|5|0|0|2|0|0	0	-37.7	0.46	0.64
ARRDC5	PRDX1	12|2	14	7	2	2|9|22|18|1|3|3|0|0	0	-63.77	0.43	0.67
ARRDC5	RABL3	2|0	2	1	2	0|0|0|0|0|0|0|0|0	0.48	-1.13	10	0.18
ARRDC5	CCT6A	9|6	15	7.5	2	0|8|13|9|0|3|5|0|0	0	-27.86	0.75	0.65
ARRDC5	CDC5L	4|2	6	3	2	3|3|7|4|2|4|3|0|0	0	-16.08	0.6	0.6
ARRDC5	VCL	3|0	3	1.5	2	0|4|11|10|0|0|0|0|0	0	-36.04	0.18	0.66
ARRDC5	VCP	5|0	5	2.5	2	0|12|35|8|0|0|1|0|0	0	-79.69	0.14	0.69
ARRDC5	OLA1	3|0	3	1.5	2	0|5|11|4|0|0|0|0|0	0	-28.58	0.22	0.64
ARRDC5	SLC16A1	18|3	21	10.5	2	1|9|2|0|2|1|9|6|1	0.01	-26.02	1.31	0.43
ARRDC5	NSUN2	2|0	2	1	2	0|5|4|0|0|0|0|0|0	0	-12.35	0.33	0.55
ARRDC5	TUBG1	8|4	12	6	2	3|8|0|2|2|4|10|6|0	0	-23.91	0.75	0.63
ARRDC5	DCAF7	10|10	20	10	2	2|4|2|3|1|8|7|5|6	0	-10.92	1.43	0.58
ARRDC5	TARS	3|0	3	1.5	2	0|7|6|8|0|0|3|0|0	0	-30.26	0.21	0.65
ARRDC5	DCAF8	2|0	2	1	2	0|0|0|0|0|0|0|0|0	0.48	-1.13	10	0.18
ARRDC5	TUFM	17|14	31	15.5	2	14|17|14|15|9|14|20|9|7	0	-41.69	0.89	0.67
ARRDC5	CKB	10|1	11	5.5	2	4|16|17|24|3|4|6|1|0	0	-79.42	0.29	0.68
ARRDC5	ERGIC1	2|2	4	2	2	0|3|1|4|0|5|5|5|3	0	-16.08	0.4	0.69
ARRDC5	RBM4B	0|2	2	1	2	0|0|0|0|0|0|0|0|0	0.48	-1.13	10	0.18
ARRDC5	TXNDC5	5|0	5	2.5	2	0|5|6|4|0|0|0|0|0	0	-21.43	0.5	0.59
ARRDC5	CALM2	3|5	8	4	2	1|1|3|0|4|0|0|1|2	0.01	-6.91	1.33	0.45
ARRDC5	CALM1	3|5	8	4	2	1|1|3|0|4|0|0|1|2	0.01	-6.91	1.33	0.45
ARRDC5	NDC1	2|0	2	1	2	0|0|0|0|2|0|0|0|0	0.26	-3.3	1.5	0.32
ARRDC5	EIF4ENIF1	3|1	4	2	2	2|1|0|2|2|3|1|0|4	0	-10.17	0.67	0.52
ARRDC5	GLO1	3|0	3	1.5	2	0|8|5|6|0|0|0|0|0	0	-27.34	0.24	0.64
ARRDC5	CUL7	5|1	6	3	2	0|0|0|0|0|2|6|0|0	0.04	-8.55	1.12	0.4
ARRDC5	TRIM28	28|13	41	20.5	2	7|21|21|26|10|23|46|15|7	0	-99.12	0.65	0.68
ARRDC5	SLC25A3	16|15	31	15.5	2	7|17|11|12|12|15|27|19|10	0	-53.63	0.74	0.68
ARRDC5	TRIM25	4|1	5	2.5	2	0|1|3|0|0|0|0|0|0	0.26	-3.84	1.88	0.31
ARRDC5	SLC25A1	2|1	3	1.5	2	4|6|4|5|6|5|10|10|6	0	-34.12	0.17	0.69
ARRDC5	TRIM27	2|3	5	2.5	2	0|0|0|2|0|2|2|0|0	0.02	-4.84	1.25	0.42
ARRDC5	SLC25A6	33|21	54	27	2	12|32|19|18|15|28|43|35|16	0	-102.95	0.74	0.68
ARRDC5	SLC25A5	33|25	58	29	2	11|31|20|23|16|33|48|36|18	0	-104.25	0.74	0.68
ARRDC5	SLC25A4	23|0	23	11.5	2	0|23|14|13|11|20|29|26|11	0	-115.12	0.44	0.68
ARRDC5	MTPAP	3|4	7	3.5	2	2|0|0|0|2|0|0|0|0	0.42	-1.13	2.62	0.29
ARRDC5	DNAJA2	25|28	53	26.5	2	12|14|6|16|13|27|35|28|7	0	-70.48	0.88	0.68
ARRDC5	DNAJA3	68|29	97	48.5	2	10|25|5|29|12|33|103|78|40	0	-233.51	0.66	0.69
ARRDC5	DNAJA1	35|21	56	28	2	9|30|13|17|15|21|47|44|9	0	-117.18	0.69	0.68
ARRDC5	ARCN1	6|3	9	4.5	2	4|5|4|2|5|0|2|3|1	0	-12.94	0.96	0.56
ARRDC5	PTPN14	0|2	2	1	2	0|0|0|0|0|3|7|0|0	0	-13.67	0.3	0.57
ARRDC5	NKAP	6|4	10	5	2	3|3|3|0|6|0|0|10|6	0	-21.32	0.68	0.63
ARRDC5	UTRN	4|6	10	5	2	9|0|0|2|9|0|1|2|2	0	-18.45	0.75	0.62
ARRDC5	TTC13	5|7	12	6	2	0|3|0|5|0|8|13|6|2	0	-25.79	0.67	0.65
ARRDC5	DMD	6|3	9	4.5	2	3|0|0|0|4|0|0|3|1	0.01	-8.09	1.35	0.45
ARRDC5	MMGT1	0|2	2	1	2	0|2|2|0|0|0|0|3|0	0	-9.85	0.43	0.51
ARRDC5	GAPDH	28|5	33	16.5	2	3|33|66|19|3|6|13|13|5	0	-153.07	0.42	0.68
ARRDC5	IFNGR1	2|2	4	2	2	0|0|0|0|0|0|0|0|0	0.97	3.41	20	0.01
ARRDC5	SEC16A	17|13	30	15	2	2|2|0|7|2|19|23|11|0	0	-44.34	0.85	0.67
ARRDC5	RICTOR	5|5	10	5	2	0|2|0|6|2|14|19|5|3	0	-41.37	0.38	0.69
ARRDC5	SRSF3	2|0	2	1	2	0|2|3|0|0|0|0|0|0	0.01	-7.05	0.6	0.43
ARRDC5	RNF130	2|2	4	2	2	0|0|0|0|0|0|0|0|0	0.97	3.41	20	0.01
ARRDC5	DNAJB12	7|4	11	5.5	2	3|6|3|2|2|1|1|9|2	0	-16.09	0.92	0.59
ARRDC5	DNAJB11	29|18	47	23.5	2	10|25|11|16|10|25|37|32|19	0	-87.96	0.75	0.68
ARRDC5	PPP6C	2|4	6	3	2	0|3|0|0|0|2|2|2|0	0.02	-6.03	1.29	0.42
ARRDC5	PJA1	6|2	8	4	2	0|0|0|0|0|0|0|0|0	0.98	3.41	40	0
ARRDC5	PJA2	0|3	3	1.5	2	0|0|0|0|0|2|2|0|0	0.12	-5.73	1.12	0.35
ARRDC5	CISD3	2|1	3	1.5	2	0|0|0|0|0|0|0|0|0	0.48	1.38	15	0.18
ARRDC5	MRPL4	4|4	8	4	2	5|5|3|5|3|5|7|2|3	0	-14.98	0.71	0.69
ARRDC5	BTF3	2|0	2	1	2	0|4|8|0|0|0|0|0|0	0	-16.45	0.25	0.59
ARRDC5	SLC3A2	6|1	7	3.5	2	0|2|2|1|0|2|0|0|0	0.32	-6.26	1.75	0.3
ARRDC5	BAG2	0|2	2	1	2	2|0|0|2|2|2|4|0|0	0	-11.31	0.38	0.53
ARRDC5	BAG3	7|3	10	5	2	2|4|2|7|2|8|21|4|0	0	-41.9	0.42	0.67
ARRDC5	BAG6	10|4	14	7	2	0|0|0|4|0|1|0|0|0	0.63	-0.75	4.2	0.04
ARRDC5	MYO1C	6|17	23	11.5	2	3|4|7|11|7|18|18|5|10	0	-50.56	0.73	0.66
ARRDC5	MYO1B	1|12	13	6.5	2	5|0|5|0|6|0|3|0|0	0.04	-19.85	1.22	0.4
ARRDC5	RPS6	4|0	4	2	2	2|11|11|8|2|2|9|2|3	0	-45.09	0.19	0.69
ARRDC5	RPS5	1|1	2	1	2	0|1|3|1|0|1|2|0|0	0	-6.26	0.5	0.69
ARRDC5	RPS3	13|7	20	10	2	4|19|24|14|4|9|23|5|5	0	-74.22	0.45	0.68
ARRDC5	RPS2	4|4	8	4	2	1|7|11|5|3|5|8|3|3	0	-26.58	0.46	0.69
ARRDC5	VDAC3	5|1	6	3	2	3|4|7|6|1|1|0|2|0	0	-21.27	0.53	0.61
ARRDC5	VDAC2	7|6	13	6.5	2	3|10|9|6|2|5|4|8|4	0	-24.04	0.72	0.65
ARRDC5	VDAC1	16|10	26	13	2	0|14|19|14|0|10|12|5|3	0	-42.3	0.83	0.67
ARRDC5	CHMP6	1|4	5	2.5	2	0|0|0|0|0|0|0|0|0	0.5	1.38	25	0.09
ARRDC5	RPS9	5|4	9	4.5	2	6|9|10|7|4|6|11|4|4	0	-31.91	0.45	0.69
ARRDC5	RPS8	4|4	8	4	2	2|7|14|9|3|3|3|1|4	0	-31.89	0.4	0.69
ARRDC5	DEF8	4|0	4	2	2	0|2|0|0|0|2|3|2|0	0.02	-9.85	0.86	0.42
ARRDC5	PSMA2	5|0	5	2.5	2	0|3|8|0|0|0|0|1|0	0	-16.55	0.62	0.53
ARRDC5	PSMA3	3|0	3	1.5	2	0|3|2|0|0|0|0|0|0	0.05	-7.05	0.9	0.39
ARRDC5	PSMA1	1|2	3	1.5	2	0|2|2|3|0|0|0|0|0	0	-7.6	0.64	0.51
ARRDC5	PSMA6	3|0	3	1.5	2	0|0|0|4|0|1|1|0|0	0.02	-8.26	0.75	0.43
ARRDC5	PSMA7	4|0	4	2	2	0|6|6|3|0|3|2|0|0	0	-21.43	0.4	0.6
ARRDC5	PSMA4	2|3	5	2.5	2	0|4|2|4|0|2|3|2|0	0	-10.91	0.68	0.56
ARRDC5	PSMA5	3|1	4	2	2	0|2|5|5|0|0|0|0|0	0	-14.24	0.5	0.58
ARRDC5	TMEM209	1|2	3	1.5	2	0|0|0|0|0|0|0|0|0	0.48	1.38	15	0.18
ARRDC5	DSG1	2|2	4	2	2	2|7|44|0|3|9|2|8|14	0	-89.1	0.09	0.69
ARRDC5	KIF16B	5|2	7	3.5	2	1|0|0|0|3|0|0|0|0	0.41	-2.27	2.62	0.29
ARRDC5	PDHA1	2|0	2	1	2	0|0|0|3|0|0|0|0|0	0.15	-3.72	1	0.34
ARRDC5	DNAJB1	8|5	13	6.5	2	0|4|7|2|0|2|0|2|2	0.01	-8.62	1.5	0.47
ARRDC5	SRM	2|0	2	1	2	0|0|0|0|0|0|0|0|0	0.48	-1.13	10	0.18
ARRDC5	LGALS8	4|4	8	4	2	0|0|0|0|0|0|0|0|0	1	6.99	40	0
ARRDC5	PRKAA1	4|3	7	3.5	2	0|1|0|1|0|2|0|1|2	0.19	-2.23	2.1	0.33
ARRDC5	ATXN10	2|0	2	1	2	0|8|3|1|0|0|3|0|0	0	-19.86	0.21	0.62
ARRDC5	FSCN1	2|0	2	1	2	0|1|5|0|0|0|0|0|0	0.01	-7.84	0.5	0.46
ARRDC5	TRAFD1	1|1	2	1	2	0|0|0|0|0|0|0|0|0	0	1.38	10	0.69
ARRDC5	MYL12B	1|1	2	1	2	0|1|3|0|0|0|0|0|0	0	-3.84	0.75	0.69
ARRDC5	RPSA	4|4	8	4	2	2|7|11|7|2|5|8|4|3	0	-26.58	0.46	0.69
ARRDC5	HN1	5|0	5	2.5	2	0|0|0|3|0|0|0|0|0	0.41	-3.72	2.5	0.29
ARRDC5	MYO19	0|4	4	2	2	4|0|0|4|4|3|8|4|0	0	-22.92	0.38	0.61
ARRDC5	TMPO	2|4	6	3	2	2|10|9|12|5|3|10|5|2	0	-39.72	0.28	0.69
ARRDC5	MCM3AP	2|4	6	3	2	0|4|0|0|2|6|11|7|1	0	-28.42	0.38	0.65
ARRDC5	FMR1	2|0	2	1	2	0|0|2|0|0|0|0|2|0	0.03	-5.73	0.75	0.4
ARRDC5	LPGAT1	1|1	2	1	2	0|2|0|0|0|0|0|2|0	0	-4.03	0.75	0.69
ARRDC5	GCDH	4|8	12	6	2	4|1|1|2|3|2|6|2|1	0.01	-10.17	1.38	0.47
ARRDC5	RPL29	4|6	10	5	2	2|2|3|4|2|4|3|2|2	0	-7.81	1.36	0.48
ARRDC5	RPL28	3|3	6	3	2	0|3|2|3|0|3|3|0|0	0	-6.91	1	0.51
ARRDC5	PCYOX1	2|0	2	1	2	0|0|0|0|0|0|0|0|0	0.48	-1.13	10	0.18
ARRDC5	RPL24	6|9	15	7.5	2	4|5|4|12|6|8|11|4|5	0	-29.17	0.73	0.65
ARRDC5	CALCOCO2	4|5	9	4.5	2	0|0|0|0|0|0|0|0|0	1	6.99	45	0
ARRDC5	RPL26	0|2	2	1	2	1|1|2|2|1|1|2|1|0	0	-8.36	0.5	0.47
ARRDC5	RPL21	2|2	4	2	2	2|5|8|4|5|1|8|0|0	0	-24.25	0.29	0.69
ARRDC5	RPL23	55|61	116	58	2	62|65|19|63|55|63|116|72|61	0	-222.45	0.69	0.69
ARRDC5	LPCAT1	4|2	6	3	2	2|3|3|2|0|3|4|3|2	0	-9.63	0.9	0.52
ARRDC5	PRRC2A	8|3	11	5.5	2	0|2|0|9|0|10|18|0|4	0	-43.8	0.45	0.67
ARRDC5	RMND1	0|2	2	1	2	0|0|0|0|0|0|0|0|0	0.48	-1.13	10	0.18
ARRDC5	PPP1CB	5|3	8	4	2	0|4|0|0|0|0|3|3|0	0	-8.09	1.2	0.48
ARRDC5	PPP1CC	4|2	6	3	2	0|0|0|1|6|0|3|0|0	0	-9.44	0.9	0.51
ARRDC5	PPP1CA	4|2	6	3	2	0|4|0|2|0|2|5|4|2	0	-13.47	0.69	0.58
ARRDC5	SRRM1	6|4	10	5	2	1|6|5|2|8|3|10|9|6	0	-27.88	0.56	0.65
ARRDC5	SRRM2	3|2	5	2.5	2	7|2|3|8|4|0|0|0|0	0	-21.52	0.39	0.64
ARRDC5	KANK2	1|2	3	1.5	2	0|0|0|0|0|2|7|2|3	0	-14.07	0.38	0.6
ARRDC5	SEC61A1	2|2	4	2	2	0|2|0|3|0|4|5|3|2	0	-12.14	0.5	0.69
ARRDC5	SEC61A2	0|2	2	1	2	0|0|0|0|0|0|0|0|0	0.48	-1.13	10	0.18
ARRDC5	PUF60	6|2	8	4	2	0|3|4|2|0|0|4|3|0	0	-10.91	1.09	0.48
ARRDC5	CANX	5|2	7	3.5	2	0|14|16|5|0|0|2|3|0	0	-43.59	0.3	0.67
ARRDC5	SLC39A10	0|2	2	1	2	0|0|0|0|0|0|0|0|0	0.48	-1.13	10	0.18
[truncated: 7,099 more rows]

## Sheet: B.Drosophila PPIs(SAINTexpress)
Bait (Annotation ID)	Prey (Annotatiaon ID)	Prey (Flybase Id)	Prey (Gene symbol)	Spec	SpecSum	AvgSpec	NumReplicates	ctrlCounts	SAINTexpress scores	logOddsScore	FoldChange	BFDR	High-confidence PPIs
CG18747	CG7668	FBgn0036929	CG7668	14|12	26	13	2	0|0|0|0|0|0|0|0|0|0|0	1	19.45	130	0	Yes
CG18747	CG9881	FBgn0031437	Arpc5	16|11	27	13.5	2	0|0|0|1|3|0|0|0|2|0|0	1	6	6.75	0	Yes
CG18747	CG6701	FBgn0033889	CG6701	14|15	29	14.5	2	0|0|0|6|4|2|1|2|3|0|3	0.96	2.87	3.35	0.01	Yes
CG18747	CG14995	FBgn0035497	CG14995	65|26	91	45.5	2	0|0|0|0|0|0|0|0|0|0|0	1	40.19	455	0	Yes
CG18747	CG3722	FBgn0003391	shg	17|6	23	11.5	2	1|0|2|0|0|0|0|0|0|0|0	0.98	3.33	11.5	0	Yes
CG18747	CG8547	FBgn0033919	CG8547	13|8	21	10.5	2	0|0|0|3|0|0|0|0|0|0|0	0.96	2.66	10.5	0.01	Yes
CG18747	CG33206	FBgn0027287	Gmap	7|8	15	7.5	2	0|0|0|0|0|0|0|0|0|0|0	1	11.71	75	0	Yes
CG18746	CG4625	FBgn0040212	Dhap-at	8|6	14	7	2	0|0|0|0|0|0|0|0|0|0|0	1	10.1	70	0	Yes
CG18746	CG1453	FBgn0030268	Klp10A	10|15	25	12.5	2	0|0|0|2|1|0|3|0|0|0|1	1	4.89	6.25	0	Yes
CG18746	CG10354	FBgn0031868	Rat1	11|11	22	11	2	0|0|0|0|3|0|5|0|0|0|0	0.88	1.96	4.12	0.01	Yes
CG18746	CG8877	FBgn0033688	Prp8	44|79	123	61.5	2	0|0|3|4|0|4|3|1|0|0|0	1	40.6	16.77	0	Yes
CG18746	CG7668	FBgn0036929	CG7668	92|103	195	97.5	2	0|0|0|0|0|0|0|0|0|0|0	1	134.62	975	0	Yes
CG18746	CG3193	FBgn0000377	crn	16|33	49	24.5	2	3|0|0|0|0|0|0|0|0|0|0	1	5.84	24.5	0	Yes
CG18746	CG6197	FBgn0033859	fand	28|51	79	39.5	2	0|0|0|0|0|0|0|0|0|0|0	1	43.1	395	0	Yes
CG18746	CG32575	FBgn0026575	hang	12|7	19	9.5	2	3|0|3|0|0|0|0|0|0|0|0	0.88	1.15	4.75	0.01	Yes
CG18746	CG8710	FBgn0033265	coil	7|8	15	7.5	2	0|0|0|0|0|0|2|0|0|0|0	0.98	3.66	11.25	0	Yes
CG18746	CG4980	FBgn0039558	BCAS2	6|9	15	7.5	2	0|0|0|0|0|0|0|0|0|0|0	1	10.1	75	0	Yes
CG18746	CG17492	FBgn0086442	mib2	13|9	22	11	2	0|0|0|0|0|0|0|0|0|0|0	1	14.85	110	0	Yes
CG18746	CG7246	FBgn0030081	CG7246	7|6	13	6.5	2	0|0|0|0|0|0|0|0|0|0|0	1	10.1	65	0	Yes
CG18746	CG4918	FBgn0003274	RpLP2	21|19	40	20	2	4|0|4|5|6|2|5|3|0|0|5	1	5.77	3.75	0	Yes
CG18746	CG3231	FBgn0086129	snama	31|58	89	44.5	2	4|1|4|4|2|1|14|1|0|0|3	0.97	2.95	6.07	0.01	Yes
CG18746	CG15784	FBgn0029766	CG15784	6|7	13	6.5	2	0|0|0|1|2|0|0|0|0|0|0	0.98	3.33	6.5	0	Yes
CG18746	CG9680	FBgn0004556	Dbp73D	8|6	14	7	2	0|0|0|0|0|0|0|0|0|0|0	1	10.1	70	0	Yes
CG18746	CG5720	FBgn0028471	Nab2	12|29	41	20.5	2	0|0|0|0|0|0|0|0|0|0|0	1	19.45	205	0	Yes
CG18746	CG5728	FBgn0039182	CG5728	18|17	35	17.5	2	0|0|0|0|0|0|0|0|0|0|0	1	26.96	175	0	Yes
CG18746	CG7028	FBgn0027587	CG7028	6|15	21	10.5	2	0|0|0|0|0|0|2|0|0|0|1	0.98	3.33	10.5	0	Yes
CG18746	CG4886	FBgn0028382	cyp33	9|17	26	13	2	0|0|0|2|0|0|5|0|0|0|0	0.88	1.25	5.57	0.01	Yes
CG18746	CG12135	FBgn0040235	c12.1	11|17	28	14	2	0|0|0|0|0|0|6|0|0|0|0	0.92	1.95	7	0.01	Yes
CG18746	CG12785	FBgn0261286	Mat89Ba	8|13	21	10.5	2	0|0|0|0|0|0|0|0|0|0|0	1	13.29	105	0	Yes
CG18746	CG1970	FBgn0039909	ND-49	12|14	26	13	2	3|0|0|5|1|0|1|0|0|0|1	0.99	3.94	4.33	0	Yes
CG18746	CG8939	FBgn0030720	CG8939	14|8	22	11	2	0|0|0|0|0|0|2|0|0|0|0	0.99	4.34	16.5	0	Yes
CG18746	CG9300	FBgn0036886	CG9300	21|23	44	22	2	0|0|0|0|0|0|0|0|0|0|0	1	32.87	220	0	Yes
CG18746	CG6375	FBgn0266581	pit	15|17	32	16	2	0|0|0|2|3|0|4|0|0|0|0	1	7.65	5.33	0	Yes
CG18746	CG4699	FBgn0262527	nsl1	101|156	257	128.5	2	0|0|0|0|0|0|0|0|0|0|0	1	147.38	1285	0	Yes
CG18746	CG33217	FBgn0053217	CG33217	10|10	20	10	2	0|0|0|0|0|0|0|0|0|0|0	1	16.4	100	0	Yes
CG18746	CG2807	FBgn0031266	Sf3b1	22|56	78	39	2	0|0|0|1|1|0|0|0|0|0|2	1	23.06	29.25	0	Yes
CG18746	CG8583	FBgn0035771	Sec63	8|9	17	8.5	2	0|0|0|2|0|0|2|0|0|0|0	1	6.7	6.38	0	Yes
CG18746	CG14637	FBgn0015331	abs	107|181	288	144	2	13|5|13|0|3|0|5|3|4|3|2	1	39.74	13.94	0	Yes
CG18746	CG1994	FBgn0027330	l(1)G0020	9|7	16	8	2	0|0|0|0|0|0|0|0|0|0|0	1	11.71	80	0	Yes
CG18746	CG14805	FBgn0023514	CG14805	18|11	29	14.5	2	0|0|0|0|0|0|2|0|0|0|0	1	6.3	21.75	0	Yes
CG18746	CG11583	FBgn0035524	CG11583	23|23	46	23	2	0|0|0|0|2|0|7|0|0|0|0	0.99	4.19	7.67	0	Yes
CG18746	CG3025	FBgn0014340	mof	20|10	30	15	2	0|0|0|0|0|0|0|0|0|0|0	1	16.4	150	0	Yes
CG18746	CG7490	FBgn0000100	RpLP0	59|57	116	58	2	14|1|13|18|13|5|19|4|6|2|12	1	15.85	3.41	0	Yes
CG18746	CG10805	FBgn0086451	l(2)k09022	38|34	72	36	2	0|0|0|0|0|0|0|0|0|0|0	1	51.8	360	0	Yes
CG18746	CG1474	FBgn0023506	Es2	15|22	37	18.5	2	0|0|0|0|0|0|0|0|0|0|0	1	23.98	185	0	Yes
CG18746	CG5808	FBgn0027617	CG5808	7|18	25	12.5	2	0|0|0|0|0|0|0|0|0|0|0	1	11.71	125	0	Yes
CG18746	CG6015	FBgn0038927	CG6015	11|21	32	16	2	0|0|0|0|0|0|0|0|0|0|0	1	17.93	160	0	Yes
CG18746	CG10360	FBgn0003231	ref(2)P	14|16	30	15	2	3|0|6|0|0|0|2|0|0|0|3	0.99	3.86	3.75	0	Yes
CG18746	CG5800	FBgn0030855	CG5800	10|13	23	11.5	2	0|0|0|0|0|0|0|0|0|0|0	1	16.4	115	0	Yes
CG18746	CG16941	FBgn0266917	Sf3a1	11|24	35	17.5	2	0|0|0|0|0|0|0|0|0|0|0	1	17.93	175	0	Yes
CG18746	CG10206	FBgn0026196	nop5	62|56	118	59	2	5|0|3|4|5|0|14|0|2|0|3	1	10.07	7.38	0	Yes
CG18746	CG6905	FBgn0265574	Cdc5	47|87	134	67	2	2|0|2|6|1|0|2|0|0|0|0	1	28.81	20.1	0	Yes
CG18746	CG3436	FBgn0031229	CG3436	7|22	29	14.5	2	0|0|0|2|1|0|2|0|0|0|0	0.96	2.52	8.7	0.01	Yes
CG18746	CG11274	FBgn0036340	SRm160	7|18	25	12.5	2	0|0|0|0|2|0|2|0|0|0|0	1	4.91	9.38	0	Yes
CG18746	CG9004	FBgn0035336	CG9004	14|12	26	13	2	0|0|0|0|0|0|0|0|0|0|0	1	19.45	130	0	Yes
CG18746	CG6701	FBgn0033889	CG6701	30|28	58	29	2	0|0|0|6|4|2|1|2|3|0|3	1	18.34	6.69	0	Yes
CG18746	CG2925	FBgn0014366	noi	12|20	32	16	2	0|0|0|0|0|0|0|0|0|0|0	1	19.45	160	0	Yes
CG18746	CG31368	FBgn0051368	CG31368	34|60	94	47	2	0|0|0|0|0|0|0|0|0|0|0	1	51.8	470	0	Yes
CG18746	CG13849	FBgn0038964	Nop56	37|43	80	40	2	11|1|7|11|8|0|6|9|4|2|4	1	12.07	3.87	0	Yes
CG18746	CG2875	FBgn0029672	CG2875	11|10	21	10.5	2	0|0|0|0|0|0|0|0|0|0|0	1	16.4	105	0	Yes
CG18746	CG4289	FBgn0037020	Pex14	12|7	19	9.5	2	0|0|0|0|0|0|2|0|0|0|0	0.99	3.66	14.25	0	Yes
CG18746	CG18273	FBgn0029525	CG18273	12|11	23	11.5	2	0|0|0|0|0|0|0|0|0|0|0	1	17.93	115	0	Yes
CG18746	CG3225	FBgn0031631	CG3225	8|20	28	14	2	0|0|0|0|0|0|0|0|0|0|0	1	13.29	140	0	Yes
CG18746	CG1091	FBgn0037470	Tailor	11|8	19	9.5	2	0|0|0|0|0|0|0|0|0|0|0	1	13.29	95	0	Yes
CG18746	CG5824	FBgn0010926	l(3)07882	18|17	35	17.5	2	0|0|0|0|0|0|0|0|0|0|0	1	26.96	175	0	Yes
CG18746	CG34349	FBgn0266719	stac	8|6	14	7	2	0|0|0|0|2|0|0|0|0|0|0	0.97	2.97	10.5	0.01	Yes
CG18746	CG3983	FBgn0038473	Ns1	12|6	18	9	2	0|0|0|1|1|0|2|0|0|0|1	0.96	2.33	6.75	0.01	Yes
CG18746	CG6189	FBgn0001341	l(1)1Bi	11|10	21	10.5	2	0|0|0|0|0|0|0|0|0|0|0	1	16.4	105	0	Yes
CG18746	CG6066	FBgn0039488	CG6066	34|69	103	51.5	2	0|0|0|0|0|0|3|0|0|0|0	1	12	51.5	0	Yes
CG18746	CG16788	FBgn0037707	RnpS1	10|19	29	14.5	2	0|0|0|0|2|0|5|0|0|0|0	0.92	1.76	6.21	0.01	Yes
CG18746	CG4268	FBgn0016696	Pitslre	8|14	22	11	2	0|0|0|0|0|0|0|0|0|0|0	1	13.29	110	0	Yes
CG18746	CG6501	FBgn0034243	Ns2	9|8	17	8.5	2	0|0|0|2|2|0|0|0|0|0|0	1	6.7	6.38	0	Yes
CG18746	CG2031	FBgn0037382	Hpr1	15|26	41	20.5	2	0|0|0|0|0|0|0|0|0|0|0	1	23.98	205	0	Yes
CG18746	CG9776	FBgn0027866	CG9776	19|39	58	29	2	0|0|0|0|0|0|0|0|0|0|0	1	29.92	290	0	Yes
CG18746	CG6843	FBgn0036827	CG6843	9|28	37	18.5	2	0|0|0|0|0|0|0|0|0|0|0	1	14.85	185	0	Yes
CG18746	CG6841	FBgn0036828	CG6841	12|24	36	18	2	6|0|3|3|2|0|1|0|0|0|3	0.91	1.48	4.5	0.01	Yes
CG18746	CG11130	FBgn0020909	Rtc1	7|6	13	6.5	2	0|0|0|0|0|0|0|0|0|0|0	1	10.1	65	0	Yes
CG18746	CG5931	FBgn0263599	l(3)72Ab	61|106	167	83.5	2	0|2|8|7|2|3|8|0|0|0|0	1	46.09	10.89	0	Yes
CG18746	CG32075	FBgn0052075	CG32075	16|9	25	12.5	2	0|0|0|0|0|0|0|0|0|0|0	1	14.85	125	0	Yes
CG18746	CG18041	FBgn0039710	dgt1	11|17	28	14	2	0|0|0|0|0|0|0|0|0|0|0	1	17.93	140	0	Yes
CG18746	CG1135	FBgn0263832	Rcd5	29|33	62	31	2	0|0|0|0|0|0|0|0|0|0|0	1	44.56	310	0	Yes
CG18746	CG32675	FBgn0052675	Tango5	8|9	17	8.5	2	0|0|0|2|3|0|0|0|0|0|0	0.97	3.04	5.1	0.01	Yes
CG18746	CG4849	FBgn0039566	CG4849	35|57	92	46	2	4|0|6|6|3|6|6|2|0|0|3	1	21.32	7.67	0	Yes
CG18746	CG7483	FBgn0037573	CG7483	30|52	82	41	2	0|0|0|4|2|0|0|0|0|0|0	1	14	20.5	0	Yes
CG18746	CG6146	FBgn0004924	Top1	7|18	25	12.5	2	0|0|0|0|0|0|3|0|0|2|0	0.95	2.13	7.5	0.01	Yes
CG18746	CG42551	FBgn0261618	larp	25|27	52	26	2	3|0|7|9|7|0|11|0|0|0|6	0.92	1.84	2.89	0.01	Yes
CG18746	CG31671	FBgn0031390	tho2	14|45	59	29.5	2	0|0|0|0|0|0|0|0|0|0|0	1	22.48	295	0	Yes
CG18746	CG8108	FBgn0027567	CG8108	6|12	18	9	2	0|0|0|0|0|0|0|0|0|0|0	1	10.1	90	0	Yes
CG18746	CG1677	FBgn0029941	CG1677	32|39	71	35.5	2	0|0|0|8|8|0|10|0|0|0|3	1	11.11	4.1	0	Yes
CG18746	CG8233	FBgn0033897	Rcd1	80|178	258	129	2	0|0|0|1|3|0|4|0|0|0|0	1	94.9	48.38	0	Yes
CG18746	CG1866	FBgn0039581	Moca-cyp	7|16	23	11.5	2	0|0|0|0|0|0|4|0|0|0|0	0.91	1.6	8.62	0.01	Yes
CG18746	CG5704	FBgn0026570	CG5704	14|12	26	13	2	0|0|0|0|0|0|0|0|0|0|0	1	19.45	130	0	Yes
CG18746	CG7597	FBgn0037093	Cdk12	10|35	45	22.5	2	0|0|0|0|0|0|4|0|0|2|0	0.97	2.72	11.25	0.01	Yes
CG18746	CG13472	FBgn0036450	Tdrd3	13|15	28	14	2	0|0|0|5|3|0|5|0|0|0|1	0.91	1.67	3.23	0.01	Yes
CG18746	CG12396	FBgn0022069	Nnp-1	15|15	30	15	2	0|0|0|0|0|0|3|0|0|0|0	1	5.46	15	0	Yes
CG18746	CG3589	FBgn0035065	CG3589	13|11	24	12	2	0|0|0|0|0|0|0|0|0|0|0	1	17.93	120	0	Yes
CG18746	CG10473	FBgn0263198	Acn	18|37	55	27.5	2	0|0|0|1|2|0|7|0|0|0|0	0.98	3.45	8.25	0	Yes
CG18746	CG12499	FBgn0038968	CG12499	17|18	35	17.5	2	0|0|0|0|0|0|0|0|0|0|0	1	26.96	175	0	Yes
CG18746	CG7704	FBgn0010356	Taf5	7|6	13	6.5	2	0|0|0|0|0|0|0|0|2|0|0	0.96	2.97	9.75	0.01	Yes
CG18746	CG1685	FBgn0015527	peng	17|25	42	21	2	2|0|2|1|2|0|7|0|0|0|2	0.99	3.73	5.73	0	Yes
CG18746	CG14641	FBgn0037220	CG14641	13|16	29	14.5	2	0|0|0|1|1|0|0|0|0|0|0	1	14.68	21.75	0	Yes
CG18746	CG11107	FBgn0033160	Dhx15	33|42	75	37.5	2	3|0|2|3|2|0|4|0|0|2|1	1	27.96	11.25	0	Yes
CG18746	CG8545	FBgn0033741	CG8545	12|6	18	9	2	0|0|0|0|0|0|3|0|0|0|2	0.88	1.14	5.4	0.01	Yes
CG18746	CG8383	FBgn0037737	Pnn	14|19	33	16.5	2	0|0|0|0|0|0|3|0|0|0|1	1	7.34	12.38	0	Yes
CG18746	CG10042	FBgn0038016	MBD-R2	79|78	157	78.5	2	0|0|0|0|0|0|0|0|0|0|0	1	114.74	785	0	Yes
CG18746	CG4202	FBgn0029755	Sas10	11|12	23	11.5	2	0|0|0|0|0|0|0|0|0|0|0	1	17.93	115	0	Yes
CG18746	CG3499	FBgn0034792	YME1L	7|10	17	8.5	2	0|0|0|0|0|0|0|0|0|0|0	1	11.71	85	0	Yes
CG18746	CG32708	FBgn0052708	CG32708	7|9	16	8	2	0|0|0|0|0|0|2|0|0|0|0	0.98	3.66	12	0	Yes
CG18746	CG30349	FBgn0050349	CG30349	12|17	29	14.5	2	0|0|0|0|0|0|3|0|0|0|0	0.99	4.31	14.5	0	Yes
CG18746	CG4554	FBgn0034734	CG4554	72|71	143	71.5	2	0|0|0|0|0|0|0|0|0|0|0	1	104.78	715	0	Yes
CG18746	CG12050	FBgn0284251	l(2)05287	9|6	15	7.5	2	0|0|0|0|0|0|0|0|0|0|0	1	10.1	75	0	Yes
CG18746	CG8368	FBgn0035707	CG8368	18|18	36	18	2	0|0|0|0|0|0|0|0|0|0|0	1	28.44	180	0	Yes
CG18746	CG7993	FBgn0038585	Non3	14|14	28	14	2	0|0|0|0|0|0|4|0|0|0|0	0.98	3.85	10.5	0	Yes
CG18746	CG9667	FBgn0037550	CG9667	6|7	13	6.5	2	0|0|0|1|1|0|0|0|0|0|0	0.99	4.79	9.75	0	Yes
CG18746	CG12750	FBgn0086707	ncm	54|70	124	62	2	0|0|0|0|0|0|3|0|0|0|0	1	18.35	62	0	Yes
CG18746	CG2691	FBgn0030504	CG2691	28|25	53	26.5	2	0|0|0|0|0|0|3|0|0|0|1	1	15.1	19.88	0	Yes
CG18746	CG6045	FBgn0038349	AOX3	19|19	38	19	2	0|0|0|0|0|0|2|0|0|0|0	1	11.18	28.5	0	Yes
CG18746	CG2843	FBgn0031452	Cwc25	15|45	60	30	2	0|0|0|0|0|0|0|0|0|0|0	1	23.98	300	0	Yes
CG18746	CG5009	FBgn0027572	CG5009	14|12	26	13	2	0|0|0|0|0|0|0|0|0|0|0	1	19.45	130	0	Yes
CG18746	CG13892	FBgn0035141	Cypl	7|10	17	8.5	2	0|0|0|1|1|0|2|0|0|0|0	0.98	3.46	6.38	0	Yes
CG18746	CG6815	FBgn0040237	bor	94|96	190	95	2	32|1|24|39|32|31|28|10|33|24|17	1	6.46	2.74	0	Yes
CG18746	CG3605	FBgn0031493	Sf3b2	12|21	33	16.5	2	0|0|0|5|2|0|2|0|0|0|0	0.99	4.43	5.5	0	Yes
CG18746	CG8833	FBgn0036386	CG8833	22|36	58	29	2	0|0|0|0|0|0|0|0|0|0|0	1	34.34	290	0	Yes
CG18746	CG6693	FBgn0037878	CG6693	8|10	18	9	2	0|0|0|0|0|0|2|0|0|0|3	0.97	3.04	5.4	0.01	Yes
CG18745	CG5215	FBgn0263603	Zn72D	8|7	15	7.5	2	0|0|0|0|0|0|0|0|0|0|0	1	11.71	75	0	Yes
CG18745	CG6701	FBgn0033889	CG6701	35|19	54	27	2	0|0|0|6|4|2|1|2|3|0|3	1	8.53	6.23	0	Yes
CG18745	CG9881	FBgn0031437	Arpc5	9|7	16	8	2	0|0|0|1|3|0|0|0|2|0|0	0.9	1.56	4	0.01	Yes
CG18745	CG3249	FBgn0263987	spoon	10|10	20	10	2	0|0|0|0|0|0|0|0|0|0|0	1	16.4	100	0	Yes
CG18745	CG5366	FBgn0027568	Cand1	25|43	68	34	2	0|0|0|6|0|0|0|0|0|0|0	1	4.7	17	0	Yes
CG18745	CG1575	FBgn0029999	CG1575	6|14	20	10	2	0|0|0|0|0|0|0|0|0|0|0	1	10.1	100	0	Yes
CG18745	CG8487	FBgn0264560	garz	10|12	22	11	2	0|0|0|0|0|0|0|0|0|0|0	1	16.4	110	0	Yes
CG18745	CG8793	FBgn0260655	l(3)76BDm	7|9	16	8	2	0|0|0|0|0|0|0|0|0|0|0	1	11.71	80	0	Yes
CG18745	CG12076	FBgn0027616	YT521-B	7|19	26	13	2	0|0|0|0|2|0|0|0|0|0|0	0.99	3.66	19.5	0	Yes
CG18745	CG32435	FBgn0021760	chb	12|11	23	11.5	2	0|0|0|0|0|0|0|0|0|0|0	1	17.93	115	0	Yes
CG18745	CG5252	FBgn0037894	Ranbp9	15|29	44	22	2	2|1|3|4|2|0|0|0|0|3|0	1	6.82	6.6	0	Yes
CG18745	CG9004	FBgn0035336	CG9004	8|14	22	11	2	0|0|0|0|0|0|0|0|0|0|0	1	13.29	110	0	Yes
CG18745	CG42569	FBgn0260771	Larp7	8|8	16	8	2	0|0|0|0|0|0|0|0|0|0|0	1	13.29	80	0	Yes
CG18745	CG5824	FBgn0010926	l(3)07882	6|7	13	6.5	2	0|0|0|0|0|0|0|0|0|0|0	1	10.1	65	0	Yes
CG18745	CG34349	FBgn0266719	stac	10|8	18	9	2	0|0|0|0|2|0|0|0|0|0|0	0.99	4.34	13.5	0	Yes
CG18745	CG10192	FBgn0260634	eIF4G2	16|17	33	16.5	2	0|0|0|1|2|0|2|0|0|0|0	1	13.34	9.9	0	Yes
CG18745	CG3499	FBgn0034792	YME1L	6|16	22	11	2	0|0|0|0|0|0|0|0|0|0|0	1	10.1	110	0	Yes
CG18745	CG18769	FBgn0042185	MCU	6|7	13	6.5	2	0|0|0|0|0|0|0|0|0|0|0	1	10.1	65	0	Yes
CG18745	CG32675	FBgn0052675	Tango5	11|9	20	10	2	0|0|0|2|3|0|0|0|0|0|0	0.99	3.96	6	0	Yes
CG18745	CG8070	FBgn0033379	Mys45A	12|19	31	15.5	2	0|0|0|0|0|0|0|0|0|0|0	1	19.45	155	0	Yes
CG18745	CG7935	FBgn0026252	msk	34|57	91	45.5	2	0|0|5|5|4|0|7|0|0|0|3	1	21.16	8.03	0	Yes
CG18745	CG42551	FBgn0261618	larp	32|34	66	33	2	3|0|7|9|7|0|11|0|0|0|6	1	10.16	3.67	0	Yes
CG18745	CG13124	FBgn0032156	CG13124	9|13	22	11	2	0|0|0|0|0|0|0|0|2|1|0	1	7.18	11	0	Yes
CG18745	CG3606	FBgn0285954	caz	14|17	31	15.5	2	0|0|0|0|0|0|8|0|0|0|0	0.9	2.02	5.81	0.01	Yes
CG18745	CG12396	FBgn0022069	Nnp-1	11|7	18	9	2	0|0|0|0|0|0|3|0|0|0|0	0.94	2.21	9	0.01	Yes
CG18745	CG32165	FBgn0042178	CG32165	18|29	47	23.5	2	0|0|0|2|1|0|0|0|0|0|0	1	19.49	23.5	0	Yes
CG18745	CG32164	FBgn0042177	CG32164	12|20	32	16	2	0|0|0|1|1|0|0|0|0|0|0	1	13.25	24	0	Yes
CG18745	CG17514	FBgn0039959	CG17514	22|24	46	23	2	0|0|0|0|0|0|3|0|0|0|0	1	7.98	23	0	Yes
CG18745	CG4554	FBgn0034734	CG4554	130|120	250	125	2	0|0|0|0|0|0|0|0|0|0|0	1	174.29	1250	0	Yes
CG18745	CG2691	FBgn0030504	CG2691	114|109	223	111.5	2	0|0|0|0|0|0|3|0|0|0|1	1	71.92	83.62	0	Yes
CG18745	CG42797	FBgn0261931	CG42797	14|9	23	11.5	2	0|0|0|0|0|0|0|0|0|0|0	1	14.85	115	0	Yes
CG18745	CG14472	FBgn0011230	poe	28|70	98	49	2	5|0|5|2|2|4|3|0|4|1|2	1	17.34	10.5	0	Yes
CG18745	CG34407	FBgn0085436	Not1	10|7	17	8.5	2	0|0|0|0|0|0|0|0|0|0|0	1	11.71	85	0	Yes
CG18745	CG14650	FBgn0037252	CG14650	9|18	27	13.5	2	0|0|0|4|0|0|0|0|0|0|0	0.95	2.3	10.12	0.01	Yes
CG18745	CG1945	FBgn0005632	faf	13|21	34	17	2	0|0|0|0|0|0|0|0|0|0|0	1	20.97	170	0	Yes
CG18745	CG3209	FBgn0034971	CG3209	6|7	13	6.5	2	0|0|0|0|0|0|0|0|0|2|0	0.96	2.97	9.75	0.01	Yes
CG1105	CG6095	FBgn0266668	Exo84	7|8	15	7.5	2	0|0|0|0|0|0|0|0|0|0|0	1	11.71	75	0	Yes
CG1105	CG8843	FBgn0266670	Sec5	10|7	17	8.5	2	0|0|0|0|0|0|0|0|0|0|0	1	11.71	85	0	Yes
CG1105	CG17509	FBgn0260012	pds5	12|14	26	13	2	0|0|0|0|0|0|0|0|0|0|0	1	19.45	130	0	Yes
CG1105	CG4554	FBgn0034734	CG4554	18|24	42	21	2	0|0|0|0|0|0|0|0|0|0|0	1	28.44	210	0	Yes
CG1105	CG15099	FBgn0034400	CG15099	27|30	57	28.5	2	0|0|0|0|0|0|0|0|0|0|0	1	41.65	285	0	Yes
CG1105	CG5366	FBgn0027568	Cand1	18|21	39	19.5	2	0|0|0|6|0|0|0|0|0|0|0	0.98	3.43	9.75	0.01	Yes
CG1105	CG4004	FBgn0030418	CG4004	7|6	13	6.5	2	0|0|0|0|0|0|0|0|0|0|0	1	10.1	65	0	Yes
CG1105	CG17723	FBgn0035432	ZnT63C	8|8	16	8	2	0|0|0|0|0|0|0|0|3|0|0	0.93	2.66	8	0.01	Yes
CG1105	CG13387	FBgn0020497	emb	75|70	145	72.5	2	1|1|2|8|8|0|9|0|0|0|7	1	54.54	8.7	0	Yes
CG1105	CG4257	FBgn0016917	Stat92E	12|7	19	9.5	2	0|0|0|2|1|0|2|0|0|0|0	0.96	2.52	5.7	0.01	Yes
CG1105	CG8487	FBgn0264560	garz	30|31	61	30.5	2	0|0|0|0|0|0|0|0|0|0|0	1	46.01	305	0	Yes
CG1105	CG42616	FBgn0261268	Cul3	9|11	20	10	2	0|0|0|0|0|0|0|0|0|0|0	1	14.85	100	0	Yes
CG1105	CG5092	FBgn0021796	Tor	13|15	28	14	2	0|0|0|0|0|0|0|0|0|0|0	1	20.97	140	0	Yes
CG1105	CG10363	FBgn0041180	Tep4	67|62	129	64.5	2	0|0|3|15|10|0|26|0|0|0|7	0.98	3.18	3.79	0	Yes
CG1105	CG1945	FBgn0005632	faf	9|12	21	10.5	2	0|0|0|0|0|0|0|0|0|0|0	1	14.85	105	0	Yes
CG1105	CG5252	FBgn0037894	Ranbp9	16|31	47	23.5	2	2|1|3|4|2|0|0|0|0|3|0	1	7.88	7.05	0	Yes
CG1105	CG5651	FBgn0086706	pix	39|31	70	35	2	0|0|0|0|0|0|0|0|0|0|0	1	47.46	350	0	Yes
CG1105	CG12703	FBgn0031069	Pmp70	7|8	15	7.5	2	0|0|0|0|0|0|0|0|0|0|0	1	11.71	75	0	Yes
CG1105	CG12702	FBgn0031070	CG12702	14|13	27	13.5	2	0|0|0|0|0|0|0|0|0|0|0	1	20.97	135	0	Yes
CG1105	CG34349	FBgn0266719	stac	25|21	46	23	2	0|0|0|0|2|0|0|0|0|0|0	1	12.36	34.5	0	Yes
CG1105	CG12132	FBgn0040236	c11.1	25|17	42	21	2	0|0|0|0|0|0|0|0|0|0|0	1	26.96	210	0	Yes
CG1105	CG3460	FBgn0023542	Nmd3	12|9	21	10.5	2	0|0|0|0|0|0|0|0|0|0|0	1	14.85	105	0	Yes
CG1105	CG11198	FBgn0033246	ACC	77|77	154	77	2	0|0|0|3|2|0|6|0|0|0|5	1	79.24	16.5	0	Yes
CG1105	CG10192	FBgn0260634	eIF4G2	9|9	18	9	2	0|0|0|1|2|0|2|0|0|0|0	0.99	4.74	5.4	0	Yes
CG1105	CG3499	FBgn0034792	YME1L	9|9	18	9	2	0|0|0|0|0|0|0|0|0|0|0	1	14.85	90	0	Yes
CG1105	CG7398	FBgn0024921	Tnpo	21|14	35	17.5	2	0|0|0|0|0|0|0|0|0|0|0	1	22.48	175	0	Yes
CG1105	CG7261	FBgn0027509	TBCD	6|6	12	6	2	0|0|0|0|0|0|1|0|0|0|1	0.99	4.79	9	0	Yes
CG1105	CG31729	FBgn0051729	CG31729	16|16	32	16	2	0|0|3|2|0|0|2|0|0|0|0	1	10.78	6.86	0	Yes
CG1105	CG3885	FBgn0266669	Sec3	9|8	17	8.5	2	0|0|0|0|0|0|0|0|0|0|0	1	13.29	85	0	Yes
CG1105	CG7935	FBgn0026252	msk	23|21	44	22	2	0|0|5|5|4|0|7|0|0|0|3	1	7.1	3.88	0	Yes
CG1105	CG33554	FBgn0053554	Nipped-A	22|23	45	22.5	2	0|0|0|0|0|0|0|0|0|0|0	1	34.34	225	0	Yes
CG1105	CG9674	FBgn0036663	CG9674	10|14	24	12	2	0|0|0|0|2|0|3|0|0|0|2	0.99	4.03	5.14	0	Yes
CG1105	CG16840	FBgn0032329	Art8	6|7	13	6.5	2	0|0|0|0|0|0|0|0|0|0|0	1	10.1	65	0	Yes
CG1105	CG7639	FBgn0033989	CG7639	11|13	24	12	2	0|0|0|0|0|0|0|0|0|0|0	1	17.93	120	0	Yes
CG1105	CG8912	FBgn0014870	Psi	36|34	70	35	2	0|0|0|0|3|0|4|0|0|0|0	1	17.17	15	0	Yes
CG1105	CG6455	FBgn0019960	Mitofilin	23|25	48	24	2	5|2|3|2|2|0|11|0|2|2|3	0.94	2.26	3.79	0.01	Yes
CG1105	CG1059	FBgn0087013	Karybeta3	112|88	200	100	2	0|3|3|10|11|0|14|0|0|0|7	1	64.55	8.57	0	Yes
CG1105	CG7456	FBgn0032258	CG7456	15|14	29	14.5	2	0|0|0|0|0|0|0|0|0|0|0	1	22.48	145	0	Yes
CG1105	CG7893	FBgn0040068	Vav	16|14	30	15	2	0|0|0|0|0|0|0|0|0|0|0	1	22.48	150	0	Yes
CG1105	CG2095	FBgn0266672	Sec8	11|11	22	11	2	0|0|0|0|0|0|0|0|0|0|0	1	17.93	110	0	Yes
CG1105	CG17753	FBgn0010531	Ccs	6|8	14	7	2	0|0|0|0|0|0|0|0|0|0|0	1	10.1	70	0	Yes
CG1105	CG4887	FBgn0031318	CG4887	6|11	17	8.5	2	0|0|0|3|2|0|0|0|0|0|0	0.88	1.14	5.1	0.01	Yes
CG1105	CG42283	FBgn0259178	5PtaseI	16|11	27	13.5	2	0|0|0|0|0|0|0|0|0|0|0	1	17.93	135	0	Yes
CG1105	CG18214	FBgn0024277	trio	13|16	29	14.5	2	0|0|0|0|0|0|0|0|0|0|0	1	20.97	145	0	Yes
CG1105	CG32165	FBgn0042178	CG32165	17|13	30	15	2	0|0|0|2|1|0|0|0|0|0|0	1	12.57	15	0	Yes
CG1105	CG32164	FBgn0042177	CG32164	11|8	19	9.5	2	0|0|0|1|1|0|0|0|0|0|0	1	7.58	14.25	0	Yes
CG1105	CG18522	FBgn0267408	AOX1	18|13	31	15.5	2	0|0|0|0|0|0|3|0|0|0|2	1	7.81	9.3	0	Yes
CG1105	CG14299	FBgn0038651	Epg5	8|6	14	7	2	0|0|0|0|0|0|0|0|0|0|0	1	10.1	70	0	Yes
CG1105	CG4994	FBgn0026409	Mpcp2	16|16	32	16	2	0|3|3|6|5|5|5|2|4|4|0	0.9	2.22	3	0.01	Yes
CG1105	CG14472	FBgn0011230	poe	32|48	80	40	2	5|0|5|2|2|4|3|0|4|1|2	1	21.9	8.57	0	Yes
CG1105	CG17514	FBgn0039959	CG17514	22|28	50	25	2	0|0|0|0|0|0|3|0|0|0|0	1	7.98	25	0	Yes
CG1105	CG15154	FBgn0041184	Socs36E	23|19	42	21	2	0|0|0|0|0|0|0|0|0|0|0	1	29.92	210	0	Yes
CG1105	CG8683	FBgn0031985	mon2	15|15	30	15	2	0|0|0|0|0|0|0|0|0|0|0	1	23.98	150	0	Yes
CG1105	CG2691	FBgn0030504	CG2691	10|15	25	12.5	2	0|0|0|0|0|0|3|0|0|0|1	0.99	4.47	9.38	0	Yes
CG1105	CG34407	FBgn0085436	Not1	15|18	33	16.5	2	0|0|0|0|0|0|0|0|0|0|0	1	23.98	165	0	Yes
CG1105	CG6045	FBgn0038349	AOX3	22|28	50	25	2	0|0|0|0|0|0|2|0|0|0|0	1	12.95	37.5	0	Yes
CG1105	CG6668	FBgn0039213	atl	285|233	518	259	2	0|0|0|2|2|0|0|0|0|0|0	1	inf	194.25	0	Yes
CG1105	CG1569	FBgn0003268	rod	6|6	12	6	2	0|0|0|2|0|0|0|0|0|0|0	0.95	2.97	9	0.01	Yes
CG1105	CG10376	FBgn0032702	CG10376	10|8	18	9	2	0|0|0|0|0|0|0|0|0|0|0	1	13.29	90	0	Yes
CG1105	CG3209	FBgn0034971	CG3209	7|7	14	7	2	0|0|0|0|0|0|0|0|0|2|0	0.98	3.66	10.5	0.01	Yes
CG14696	CG9393	FBgn0037710	CG9393	10|8	18	9	2	0|0|0|0|0|0|0|0|0|0|0	1	13.29	90	0	Yes
CG14696	CG1715	FBgn0010808	Chchd3	16|15	31	15.5	2	2|0|2|2|2|0|5|0|0|0|0	1	7.65	5.17	0	Yes
CG14696	CG6757	FBgn0040475	SH3PX1	8|7	15	7.5	2	0|0|0|3|0|0|0|0|0|0|0	0.92	2.21	7.5	0.01	Yes
CG14696	CG2970	FBgn0034936	CG2970	8|9	17	8.5	2	0|0|0|2|3|0|2|0|0|0|0	0.9	1.75	3.64	0.01	Yes
CG14696	CG14637	FBgn0015331	abs	38|36	74	37	2	13|5|13|0|3|0|5|3|4|3|2	0.99	4.49	3.58	0	Yes
CG14696	CG8877	FBgn0033688	Prp8	23|17	40	20	2	0|0|3|4|0|4|3|1|0|0|0	1	8.1	5.45	0	Yes
CG14696	CG2028	FBgn0015024	CkIalpha	23|18	41	20.5	2	4|0|0|8|7|3|3|0|2|2|1	0.91	1.57	3.24	0.01	Yes
CG14696	CG5252	FBgn0037894	Ranbp9	14|12	26	13	2	2|1|3|4|2|0|0|0|0|3|0	0.98	3.48	3.9	0	Yes
CG14696	CG14816	FBgn0023517	Pgam5	19|14	33	16.5	2	4|0|2|5|0|0|0|0|0|0|0	1	4.81	4.5	0	Yes
CG14696	CG12132	FBgn0040236	c11.1	10|8	18	9	2	0|0|0|0|0|0|0|0|0|0|0	1	13.29	90	0	Yes
CG14696	CG6455	FBgn0019960	Mitofilin	45|38	83	41.5	2	5|2|3|2|2|0|11|0|2|2|3	1	8.09	6.55	0	Yes
CG14696	CG3499	FBgn0034792	YME1L	8|8	16	8	2	0|0|0|0|0|0|0|0|0|0|0	1	13.29	80	0	Yes
CG14696	CG1134	FBgn0035483	Mul1	7|6	13	6.5	2	0|0|0|0|0|0|0|0|0|0|0	1	10.1	65	0	Yes
CG14696	CG7635	FBgn0030993	Mec2	41|30	71	35.5	2	8|1|4|7|6|5|4|0|5|0|3	1	13.45	5.07	0	Yes
CG14696	CG7639	FBgn0033989	CG7639	50|31	81	40.5	2	0|0|0|0|0|0|0|0|0|0|0	1	47.46	405	0	Yes
CG14696	CG5903	FBgn0038400	CG5903	18|11	29	14.5	2	0|0|0|0|0|0|0|0|0|0|0	1	17.93	145	0	Yes
CG14696	CG32165	FBgn0042178	CG32165	10|6	16	8	2	0|0|0|2|1|0|0|0|0|0|0	0.98	3.33	8	0	Yes
CG14696	CG10360	FBgn0003231	ref(2)P	30|20	50	25	2	3|0|6|0|0|0|2|0|0|0|3	1	10.42	6.25	0	Yes
CG14696	CG8683	FBgn0031985	mon2	16|9	25	12.5	2	0|0|0|0|0|0|0|0|0|0|0	1	14.85	125	0	Yes
CG14696	CG11665	FBgn0033028	CG11665	8|6	14	7	2	0|0|0|0|0|0|0|0|0|0|0	1	10.1	70	0	Yes
CG14696	CG3209	FBgn0034971	CG3209	10|8	18	9	2	0|0|0|0|0|0|0|0|0|2|0	0.99	4.34	13.5	0	Yes
CG2993	CG7668	FBgn0036929	CG7668	6|6	12	6	2	0|0|0|0|0|0|0|0|0|0|0	1	10.1	60	0	Yes
CG2993	CG6303	FBgn0266717	Bruce	12|11	23	11.5	2	0|0|0|0|0|0|0|0|0|0|0	1	17.93	115	0	Yes
CG2993	CG9881	FBgn0031437	Arpc5	11|7	18	9	2	0|0|0|1|3|0|0|0|2|0|0	0.91	1.56	4.5	0.01	Yes
CG2993	CG2093	FBgn0033194	Vps13	7|13	20	10	2	0|0|0|2|2|0|0|0|0|0|0	1	4.91	7.5	0	Yes
CG2993	CG4145	FBgn0000299	Col4a1	9|7	16	8	2	0|0|0|0|0|0|0|0|2|0|0	0.98	3.66	12	0	Yes
CG2993	CG8001	FBgn0035268	CG8001	6|9	15	7.5	2	0|0|0|0|0|0|0|0|0|0|0	1	10.1	75	0	Yes
CG2993	CG44159	FBgn0265042	Irk1	6|9	15	7.5	2	0|0|0|2|2|0|0|0|0|0|0	0.98	3.25	5.62	0	Yes
CG2993	CG2718	FBgn0001142	Gs1	10|16	26	13	2	0|0|0|2|2|0|3|0|0|0|1	0.99	4.03	5.57	0	Yes
CG2993	CG7546	FBgn0035793	CG7546	9|12	21	10.5	2	0|0|0|3|1|0|0|0|0|0|0	0.99	3.75	7.88	0	Yes
CG2993	CG3651	FBgn0032974	CG3651	11|10	21	10.5	2	0|0|0|0|0|0|0|0|0|0|0	1	16.4	105	0	Yes
CG2993	CG16858	FBgn0016075	vkg	8|6	14	7	2	0|0|0|0|0|0|0|0|0|0|0	1	10.1	70	0	Yes
CG2993	CG1891	FBgn0003317	sax	7|10	17	8.5	2	0|0|0|0|0|0|0|0|0|0|0	1	11.71	85	0	Yes
CG2993	CG10289	FBgn0035688	CG10289	15|13	28	14	2	2|0|3|2|0|0|4|0|0|0|0	1	5.53	4.67	0	Yes
CG2993	CG3443	FBgn0003048	pcx	8|7	15	7.5	2	0|0|0|0|0|0|0|0|0|0|0	1	11.71	75	0	Yes
CG2993	CG42279	FBgn0259174	Nedd4	238|254	492	246	2	0|0|0|2|0|0|2|0|0|0|0	1	inf	184.5	0	Yes
CG2993	CG5604	FBgn0032208	Ufd4	32|33	65	32.5	2	0|0|0|0|0|0|0|0|0|0|0	1	48.91	325	0	Yes
CG2993	CG8184	FBgn0030674	CG8184	17|22	39	19.5	2	0|0|0|0|0|0|0|0|0|0|0	1	26.96	195	0	Yes
CG2993	CG1677	FBgn0029941	CG1677	56|68	124	62	2	0|0|0|8|8|0|10|0|0|0|3	1	37.07	7.15	0	Yes
CG2993	CG7893	FBgn0040068	Vav	28|26	54	27	2	0|0|0|0|0|0|0|0|0|0|0	1	40.19	270	0	Yes
CG2993	CG7029	FBgn0039026	CG7029	12|12	24	12	2	0|0|0|0|0|0|0|0|0|0|0	1	19.45	120	0	Yes
CG2993	CG16974	FBgn0032479	CG16974	6|7	13	6.5	2	0|0|0|0|0|0|0|0|0|0|0	1	10.1	65	0	Yes
CG2993	CG15784	FBgn0029766	CG15784	14|14	28	14	2	0|0|0|1|2|0|0|0|0|0|0	1	13.94	14	0	Yes
CG2993	CG8547	FBgn0033919	CG8547	12|7	19	9.5	2	0|0|0|3|0|0|0|0|0|0|0	0.94	2.21	9.5	0.01	Yes
CG2993	CG10689	FBgn0086444	l(2)37Cb	10|12	22	11	2	0|0|0|0|0|4|2|0|0|0|0	0.96	2.72	5.5	0.01	Yes
CG2993	CG14472	FBgn0011230	poe	14|17	31	15.5	2	5|0|5|2|2|4|3|0|4|1|2	0.93	1.85	3.32	0.01	Yes
CG2993	CG3251	FBgn0031622	CG3251	7|9	16	8	2	0|0|0|0|0|0|0|0|0|0|0	1	11.71	80	0	Yes
CG2993	CG6137	FBgn0000146	aub	16|15	31	15.5	2	0|0|0|2|0|0|0|0|3|4|0	1	7.65	5.17	0	Yes
CG2993	CG42797	FBgn0261931	CG42797	66|69	135	67.5	2	0|0|0|0|0|0|0|0|0|0|0	1	97.66	675	0	Yes
CG2993	CG34407	FBgn0085436	Not1	6|6	12	6	2	0|0|0|0|0|0|0|0|0|0|0	1	10.1	60	0	Yes
CG2993	CG8222	FBgn0032006	Pvr	9|17	26	13	2	0|0|0|0|0|0|0|0|0|0|0	1	14.85	130	0	Yes
CG2993	CG4244	FBgn0003557	Su(dx)	13|16	29	14.5	2	0|0|0|0|0|0|0|0|0|0|0	1	20.97	145	0	Yes
CG2993	CG11665	FBgn0033028	CG11665	6|6	12	6	2	0|0|0|0|0|0|0|0|0|0|0	1	10.1	60	0	Yes
CG2993	CG1945	FBgn0005632	faf	14|14	28	14	2	0|0|0|0|0|0|0|0|0|0|0	1	22.48	140	0	Yes
CG2993	CG3164	FBgn0025683	CG3164	15|21	36	18	2	2|0|3|7|4|4|1|3|2|2|2	0.94	2.04	3.6	0.01	Yes
CG7047	CG12261	FBgn0039555	mRpS22	6|7	13	6.5	2	0|0|0|3|0|0|0|0|0|0|0	0.88	1.74	6.5	0.01	Yes
CG7047	CG3605	FBgn0031493	Sf3b2	14|10	24	12	2	0|0|0|5|2|0|2|0|0|0|0	0.95	2.12	4	0.01	Yes
CG7047	CG8877	FBgn0033688	Prp8	15|18	33	16.5	2	0|0|3|4|0|4|3|1|0|0|0	1	5.93	4.5	0	Yes
CG7047	CG3249	FBgn0263987	spoon	6|11	17	8.5	2	0|0|0|0|0|0|0|0|0|0|0	1	10.1	85	0	Yes
CG7047	CG6197	FBgn0033859	fand	9|15	24	12	2	0|0|0|0|0|0|0|0|0|0|0	1	14.85	120	0	Yes
CG7047	CG7035	FBgn0022942	Cbp80	21|30	51	25.5	2	0|0|0|0|0|0|3|0|0|0|1	1	12.3	19.12	0	Yes
CG7047	CG12359	FBgn0027603	Ulp1	27|30	57	28.5	2	0|0|0|6|7|0|0|0|0|0|0	1	5.1	6.58	0	Yes
CG7047	CG7843	FBgn0033062	Ars2	47|42	89	44.5	2	0|0|0|14|11|0|8|0|0|2|4	1	15.86	4.05	0	Yes
CG7047	CG4918	FBgn0003274	RpLP2	30|39	69	34.5	2	4|0|4|5|6|2|5|3|0|0|5	1	17.68	6.47	0	Yes
CG7047	CG18361	FBgn0000499	dsh	9|9	18	9	2	0|0|0|0|0|0|0|0|0|0|0	1	14.85	90	0	Yes
CG7047	CG15784	FBgn0029766	CG15784	8|10	18	9	2	0|0|0|1|2|0|0|0|0|0|0	1	5.87	9	0	Yes
CG7047	CG5726	FBgn0034313	CG5726	18|27	45	22.5	2	0|0|0|7|4|0|2|0|0|0|1	1	5.78	5.19	0	Yes
CG7047	CG2843	FBgn0031452	Cwc25	7|9	16	8	2	0|0|0|0|0|0|0|0|0|0|0	1	11.71	80	0	Yes
CG7047	CG7028	FBgn0027587	CG7028	6|6	12	6	2	0|0|0|0|0|0|2|0|0|0|1	0.97	3.33	6	0.01	Yes
CG7047	CG8939	FBgn0030720	CG8939	10|11	21	10.5	2	0|0|0|0|0|0|2|0|0|0|0	1	5.66	15.75	0	Yes
CG7047	CG2807	FBgn0031266	Sf3b1	25|20	45	22.5	2	0|0|0|1|1|0|0|0|0|0|2	1	20.32	16.88	0	Yes
CG7047	CG14637	FBgn0015331	abs	46|56	102	51	2	13|5|13|0|3|0|5|3|4|3|2	1	10.6	4.94	0	Yes
CG7047	CG14224	FBgn0031057	Ubqn	105|65	170	85	2	8|0|25|4|0|0|7|0|0|0|0	0.99	4.5	6.38	0	Yes
CG7047	CG4618	FBgn0035589	CHMP2B	22|28	50	25	2	8|1|7|0|0|0|3|0|0|0|1	1	8.03	4.17	0	Yes
CG7047	CG8414	FBgn0034073	CG8414	25|26	51	25.5	2	0|0|0|0|0|0|0|0|0|0|0	1	38.73	255	0	Yes
CG7047	CG11583	FBgn0035524	CG11583	24|22	46	23	2	0|0|0|0|2|0|7|0|0|0|0	0.98	3.96	7.67	0	Yes
CG7047	CG8092	FBgn0033998	row	40|24	64	32	2	2|0|2|0|0|0|0|0|0|0|0	1	46.28	24	0	Yes
CG7047	CG12076	FBgn0027616	YT521-B	16|15	31	15.5	2	0|0|0|0|2|0|0|0|0|0|0	1	8.78	23.25	0	Yes
CG7047	CG7490	FBgn0000100	RpLP0	52|54	106	53	2	14|1|13|18|13|5|19|4|6|2|12	1	9.94	3.12	0	Yes
CG7047	CG6905	FBgn0265574	Cdc5	33|33	66	33	2	2|0|2|6|1|0|2|0|0|0|0	1	18.03	9.9	0	Yes
CG7047	CG6701	FBgn0033889	CG6701	17|16	33	16.5	2	0|0|0|6|4|2|1|2|3|0|3	1	5.2	3.81	0	Yes
CG7047	CG5931	FBgn0263599	l(3)72Ab	24|41	65	32.5	2	0|2|8|7|2|3|8|0|0|0|0	1	4.73	4.24	0	Yes
CG7047	CG32498	FBgn0000479	dnc	8|7	15	7.5	2	0|0|0|0|0|0|0|0|0|0|0	1	11.71	75	0	Yes
CG7047	CG31368	FBgn0051368	CG31368	12|9	21	10.5	2	0|0|0|0|0|0|0|0|0|0|0	1	14.85	105	0	Yes
CG7047	CG5965	FBgn0010328	woc	47|36	83	41.5	2	0|0|0|0|0|0|0|0|0|0|0	1	54.69	415	0	Yes
CG7047	CG5837	FBgn0011771	Hem	8|6	14	7	2	0|0|0|0|0|0|0|0|0|0|0	1	10.1	70	0	Yes
CG7047	CG6189	FBgn0001341	l(1)1Bi	6|6	12	6	2	0|0|0|0|0|0|0|0|0|0|0	1	10.1	60	0	Yes
CG7047	CG6066	FBgn0039488	CG6066	10|19	29	14.5	2	0|0|0|0|0|0|3|0|0|0|0	0.98	3.51	14.5	0	Yes
CG7047	CG2031	FBgn0037382	Hpr1	7|12	19	9.5	2	0|0|0|0|0|0|0|0|0|0|0	1	11.71	95	0	Yes
CG7047	CG9776	FBgn0027866	CG9776	8|15	23	11.5	2	0|0|0|0|0|0|0|0|0|0|0	1	13.29	115	0	Yes
CG7047	CG7993	FBgn0038585	Non3	9|10	19	9.5	2	0|0|0|0|0|0|4|0|0|0|0	0.92	2.3	7.12	0.01	Yes
CG7047	CG7831	FBgn0002924	ncd	11|9	20	10	2	0|0|0|1|3|0|2|0|0|0|0	0.99	3.82	5	0	Yes
CG7047	CG6842	FBgn0283469	Vps4	33|35	68	34	2	11|1|11|5|4|4|5|2|2|3|5	1	9.95	3.78	0	Yes
CG7047	CG7483	FBgn0037573	CG7483	26|26	52	26	2	0|0|0|4|2|0|0|0|0|0|0	1	11.77	13	0	Yes
CG7047	CG6410	FBgn0034265	Snx16	64|58	122	61	2	0|0|0|0|0|0|0|0|0|0|0	1	86.25	610	0	Yes
CG7047	CG31671	FBgn0031390	tho2	11|15	26	13	2	0|0|0|0|0|0|0|0|0|0|0	1	17.93	130	0	Yes
CG7047	CG11680	FBgn0002774	mle	10|10	20	10	2	0|0|0|0|2|0|0|0|0|0|0	1	5.66	15	0	Yes
CG7047	CG7668	FBgn0036929	CG7668	28|32	60	30	2	0|0|0|0|0|0|0|0|0|0|0	1	43.1	300	0	Yes
CG7047	CG7946	FBgn0039743	CG7946	10|10	20	10	2	3|0|0|3|2|0|2|0|0|0|0	0.96	3.1	3.75	0.01	Yes
CG7047	CG3193	FBgn0000377	crn	6|8	14	7	2	3|0|0|0|0|0|0|0|0|0|0	0.89	1.74	7	0.01	Yes
CG7047	CG8184	FBgn0030674	CG8184	6|10	16	8	2	0|0|0|0|0|0|0|0|0|0|0	1	10.1	80	0	Yes
CG7047	CG1677	FBgn0029941	CG1677	61|92	153	76.5	2	0|0|0|8|8|0|10|0|0|0|3	1	42.78	8.83	0	Yes
CG7047	CG2173	FBgn0021995	Rs1	6|8	14	7	2	0|0|0|0|0|0|0|0|0|0|0	1	10.1	70	0	Yes
CG7047	CG9795	FBgn0037234	CG9795	11|8	19	9.5	2	0|0|0|2|3|0|0|0|0|0|0	0.98	3.04	5.7	0.01	Yes
CG7047	CG12396	FBgn0022069	Nnp-1	13|9	22	11	2	0|0|0|0|0|0|3|0|0|0|0	0.97	3.09	11	0.01	Yes
CG7047	CG10341	FBgn0032701	CG10341	6|7	13	6.5	2	0|0|0|0|0|0|0|0|0|0|0	1	10.1	65	0	Yes
CG7047	CG8384	FBgn0001139	gro	22|55	77	38.5	2	0|0|0|1|1|0|0|0|0|0|0	1	27.58	57.75	0	Yes
CG7047	CG1685	FBgn0015527	peng	14|18	32	16	2	2|0|2|1|2|0|7|0|0|0|2	0.94	2.12	4.36	0.01	Yes
CG7047	CG14641	FBgn0037220	CG14641	11|6	17	8.5	2	0|0|0|1|1|0|0|0|0|0|0	1	4.79	12.75	0	Yes
CG7047	CG11107	FBgn0033160	Dhx15	17|15	32	16	2	3|0|2|3|2|0|4|0|0|2|1	1	6.82	4.8	0	Yes
CG7047	CG8383	FBgn0037737	Pnn	6|10	16	8	2	0|0|0|0|0|0|3|0|0|0|1	0.91	1.59	6	0.01	Yes
CG7047	CG4202	FBgn0029755	Sas10	6|9	15	7.5	2	0|0|0|0|0|0|0|0|0|0|0	1	10.1	75	0	Yes
CG7047	CG32685	FBgn0052685	ZAP3	79|180	259	129.5	2	0|0|0|6|4|0|2|0|0|0|0	1	85.5	32.38	0	Yes
CG7047	CG42551	FBgn0261618	larp	27|36	63	31.5	2	3|0|7|9|7|0|11|0|0|0|6	0.99	4.27	3.5	0	Yes
CG7047	CG5728	FBgn0039182	CG5728	24|14	38	19	2	0|0|0|0|0|0|0|0|0|0|0	1	22.48	190	0	Yes
CG7047	CG8368	FBgn0035707	CG8368	8|7	15	7.5	2	0|0|0|0|0|0|0|0|0|0|0	1	11.71	75	0	Yes
CG7047	CG12750	FBgn0086707	ncm	18|23	41	20.5	2	0|0|0|0|0|0|3|0|0|0|0	1	6.57	20.5	0	Yes
CG7047	CG2691	FBgn0030504	CG2691	7|8	15	7.5	2	0|0|0|0|0|0|3|0|0|0|1	0.93	2.31	5.62	0.01	Yes
CG7047	CG1800	FBgn0039861	pasha	17|17	34	17	2	0|0|0|2|0|0|3|0|0|0|1	1	13.21	8.5	0	Yes
CG7047	CG4260	FBgn0264855	AP-2alpha	20|23	43	21.5	2	4|1|7|5|5|0|4|0|0|2|5	1	5.96	3.79	0	Yes
CG7047	CG6501	FBgn0034243	Ns2	7|9	16	8	2	0|0|0|2|2|0|0|0|0|0|0	1	4.91	6	0	Yes
CG7047	CG4849	FBgn0039566	CG4849	18|23	41	20.5	2	4|0|6|6|3|6|6|2|0|0|3	0.97	2.6	3.42	0.01	Yes
CG7047	CG17838	FBgn0038826	Syp	10|11	21	10.5	2	0|0|0|1|2|0|0|0|0|0|2	1	5.9	6.3	0	Yes
CG7047	CG11130	FBgn0020909	Rtc1	8|7	15	7.5	2	0|0|0|0|0|0|0|0|0|0|0	1	11.71	75	0	Yes
CG4674	CG10465	FBgn0033017	CG10465	13|8	21	10.5	2	0|0|0|0|0|0|0|0|0|0|0	1	13.29	105	0	Yes
CG4674	CG12323	FBgn0029134	Prosbeta5	8|12	20	10	2	0|0|0|0|0|0|0|0|0|0|0	1	13.29	100	0	Yes
CG4674	CG15784	FBgn0029766	CG15784	44|46	90	45	2	0|0|0|1|2|0|0|0|0|0|0	1	56.19	45	0	Yes
CG4674	CG1406	FBgn0033210	U2A	9|12	21	10.5	2	0|0|0|0|0|0|0|0|0|0|0	1	14.85	105	0	Yes
CG4674	CG8241	FBgn0086895	pea	15|18	33	16.5	2	0|0|0|0|0|0|0|0|0|0|0	1	23.98	165	0	Yes
CG4674	CG13316	FBgn0023215	Mnt	9|6	15	7.5	2	0|0|0|0|0|0|0|0|0|0|0	1	10.1	75	0	Yes
CG4674	CG42663	FBgn0261545	CG42663	6|7	13	6.5	2	0|0|0|0|0|0|0|0|0|0|0	1	10.1	65	0	Yes
CG4674	CG10061	FBgn0011020	Sas-4	21|21	42	21	2	0|0|0|5|1|0|0|0|0|0|0	1	5.32	10.5	0	Yes
CG4674	CG31368	FBgn0051368	CG31368	47|45	92	46	2	0|0|0|0|0|0|0|0|0|0|0	1	67.64	460	0	Yes
CG4674	CG16788	FBgn0037707	RnpS1	14|12	26	13	2	0|0|0|0|2|0|5|0|0|0|0	0.95	2.6	5.57	0.01	Yes
CG4674	CG8817	FBgn0041111	lilli	17|13	30	15	2	0|0|0|0|0|0|0|0|0|0|0	1	20.97	150	0	Yes
CG4674	CG7764	FBgn0261109	mrn	10|9	19	9.5	2	0|0|0|0|3|0|0|0|0|0|0	0.96	3.09	9.5	0.01	Yes
CG4674	CG8475	FBgn0031995	CG8475	8|7	15	7.5	2	0|0|0|3|0|0|0|0|0|0|0	0.92	2.21	7.5	0.01	Yes
CG4674	CG42279	FBgn0259174	Nedd4	893|953	1846	923	2	0|0|0|2|0|0|2|0|0|0|0	1	inf	692.25	0	Yes
CG4674	CG11680	FBgn0002774	mle	6|6	12	6	2	0|0|0|0|2|0|0|0|0|0|0	0.95	2.97	9	0.01	Yes
CG4674	CG12084	FBgn0043458	CG12084	13|8	21	10.5	2	0|0|0|0|0|0|0|0|0|0|0	1	13.29	105	0	Yes
CG4674	CG31357	FBgn0051357	CG31357	10|6	16	8	2	0|0|0|0|0|0|0|0|0|0|0	1	10.1	80	0	Yes
CG4674	CG31601	FBgn0051601	CG31601	23|27	50	25	2	0|0|0|9|6|0|2|0|0|0|0	0.99	4.27	4.41	0	Yes
CG4674	CG4931	FBgn0038320	Sra-1	9|9	18	9	2	0|0|0|0|0|0|0|0|0|0|0	1	14.85	90	0	Yes
CG4674	CG12306	FBgn0003124	polo	8|10	18	9	2	0|0|0|2|0|0|4|0|0|0|1	0.92	1.75	3.86	0.01	Yes
CG4674	CG7597	FBgn0037093	Cdk12	18|17	35	17.5	2	0|0|0|0|0|0|4|0|0|2|0	1	6.7	8.75	0	Yes
CG4674	CG7358	FBgn0030974	CG7358	17|21	38	19	2	0|0|0|0|0|0|0|0|0|0|0	1	26.96	190	0	Yes
CG4674	CG5266	FBgn0086134	Prosalpha2	12|12	24	12	2	0|0|0|2|3|0|3|0|2|3|0	0.99	4.43	4	0	Yes
CG4674	CG3589	FBgn0035065	CG3589	7|10	17	8.5	2	0|0|0|0|0|0|0|0|0|0|0	1	11.71	85	0	Yes
CG4674	CG33193	FBgn0053193	sav	19|28	47	23.5	2	0|0|0|6|3|0|0|0|0|0|0	0.99	4.18	7.83	0	Yes
CG4674	CG12272	FBgn0036571	Strumpellin	75|78	153	76.5	2	0|0|0|0|0|0|0|0|0|0|0	1	110.47	765	0	Yes
CG4674	CG7955	FBgn0035244	ABCB7	7|7	14	7	2	0|0|0|0|0|0|0|0|1|2|0	0.99	4.59	7	0	Yes
CG4674	CG1519	FBgn0023175	Prosalpha7	20|17	37	18.5	2	0|0|0|6|4|0|5|0|0|0|4	0.99	4.42	3.7	0	Yes
CG4674	CG11107	FBgn0033160	Dhx15	11|11	22	11	2	3|0|2|3|2|0|4|0|0|2|1	0.91	2.31	3.3	0.01	Yes
CG4674	CG6315	FBgn0000662	fl(2)d	19|19	38	19	2	0|0|0|4|3|0|4|0|0|0|0	1	10.22	5.18	0	Yes
CG4674	CG6551	FBgn0001079	fu	14|18	32	16	2	0|0|0|0|2|2|0|0|0|0|0	1	19.57	12	0	Yes
CG4674	CG5451	FBgn0038666	Smu1	8|6	14	7	2	0|0|0|0|0|0|0|0|0|0|0	1	10.1	70	0	Yes
CG4674	CG4268	FBgn0016696	Pitslre	6|7	13	6.5	2	0|0|0|0|0|0|0|0|0|0|0	1	10.1	65	0	Yes
CG4674	CG42797	FBgn0261931	CG42797	60|65	125	62.5	2	0|0|0|0|0|0|0|0|0|0|0	1	89.1	625	0	Yes
CG4674	CG42641	FBgn0261396	Rpn3	28|25	53	26.5	2	4|0|2|12|7|0|7|0|2|0|5	0.97	2.88	3.06	0.01	Yes
CG4674	CG34407	FBgn0085436	Not1	6|7	13	6.5	2	0|0|0|0|0|0|0|0|0|0|0	1	10.1	65	0	Yes
CG4674	CG4320	FBgn0029840	raptor	16|13	29	14.5	2	0|0|0|3|0|0|0|0|0|0|0	0.99	4.7	14.5	0	Yes
CG4674	CG7611	FBgn0037094	CG7611	9|13	22	11	2	0|0|0|0|0|0|0|0|0|0|0	1	14.85	110	0	Yes
CG4674	CG13425	FBgn0267791	HnRNP-K	11|9	20	10	2	0|0|0|0|3|0|3|0|0|0|0	0.97	2.94	5	0.01	Yes
CG4674	CG15445	FBgn0031161	CG15445	7|8	15	7.5	2	0|0|0|0|0|0|0|0|0|0|0	1	11.71	75	0	Yes
CG4674	CG2247	FBgn0030320	CG2247	6|10	16	8	2	0|0|0|0|0|0|0|0|0|0|0	1	10.1	80	0	Yes
CG4674	CG9491	FBgn0265778	PDZ-GEF	12|16	28	14	2	0|0|0|0|0|0|0|0|0|0|0	1	19.45	140	0	Yes
CG4674	CG12261	FBgn0039555	mRpS22	7|11	18	9	2	0|0|0|3|0|0|0|0|0|0|0	0.94	2.21	9	0.01	Yes
CG4674	CG6757	FBgn0040475	SH3PX1	46|43	89	44.5	2	0|0|0|3|0|0|0|0|0|0|0	1	14.9	44.5	0	Yes
CG4674	CG8877	FBgn0033688	Prp8	82|84	166	83	2	0|0|3|4|0|4|3|1|0|0|0	1	91.5	22.64	0	Yes
CG4674	CG1523	FBgn0039601	CG1523	8|13	21	10.5	2	0|0|0|0|0|0|0|0|0|0|2	0.99	4.34	15.75	0	Yes
CG4674	CG8276	FBgn0263144	bin3	7|6	13	6.5	2	0|0|0|0|0|0|0|0|0|0|0	1	10.1	65	0	Yes
CG4674	CG10192	FBgn0260634	eIF4G2	16|13	29	14.5	2	0|0|0|1|2|0|2|0|0|0|0	1	9.54	8.7	0	Yes
CG4674	CG6197	FBgn0033859	fand	22|23	45	22.5	2	0|0|0|0|0|0|0|0|0|0|0	1	34.34	225	0	Yes
CG4674	CG16742	FBgn0034529	FAM21	38|39	77	38.5	2	0|0|0|0|0|0|0|0|0|0|0	1	57.58	385	0	Yes
CG4674	CG31022	FBgn0039776	PH4alphaEFB	12|11	23	11.5	2	0|0|0|2|3|2|0|2|2|3|0	0.99	4.23	4.31	0	Yes
CG4674	CG4005	FBgn0034970	yki	23|23	46	23	2	0|0|0|0|0|0|6|0|0|0|1	0.99	4.73	9.86	0	Yes
CG4674	CG4849	FBgn0039566	CG4849	35|35	70	35	2	4|0|6|6|3|6|6|2|0|0|3	1	21.32	5.83	0	Yes
CG4674	CG42320	FBgn0265998	Doa	20|27	47	23.5	2	0|0|0|2|5|0|3|0|0|0|0	1	12.26	7.05	0	Yes
CG4674	CG2658	FBgn0024992	CG2658	18|18	36	18	2	0|0|0|0|0|0|0|0|0|0|0	1	28.44	180	0	Yes
CG4674	CG15104	FBgn0267351	Topors	8|8	16	8	2	0|0|0|0|0|0|0|0|0|0|0	1	13.29	80	0	Yes
CG4674	CG2252	FBgn0004656	fs(1)h	62|36	98	49	2	0|0|0|0|0|0|3|0|0|0|0	1	12.65	49	0	Yes
CG4674	CG12076	FBgn0027616	YT521-B	7|11	18	9	2	0|0|0|0|2|0|0|0|0|0|0	0.99	3.66	13.5	0	Yes
CG4674	CG16916	FBgn0028686	Rpt3	22|28	50	25	2	3|0|2|9|6|0|5|0|0|0|3	1	5.35	3.75	0	Yes
CG4674	CG9006	FBgn0086712	Egm	32|36	68	34	2	0|1|2|7|7|0|5|0|0|0|3	1	17.22	5.37	0	Yes
CG4674	CG11166	FBgn0033166	Eaf	51|49	100	50	2	0|0|0|0|2|0|0|0|0|0|0	1	28.14	75	0	Yes
CG4674	CG2925	FBgn0014366	noi	16|15	31	15.5	2	0|0|0|0|0|0|0|0|0|0|0	1	23.98	155	0	Yes
CG4674	CG1796	FBgn0030365	Tango4	33|40	73	36.5	2	1|0|2|0|0|0|6|0|0|2|0	1	18.03	10.95	0	Yes
CG4674	CG5837	FBgn0011771	Hem	8|8	16	8	2	0|0|0|0|0|0|0|0|0|0|0	1	13.29	80	0	Yes
CG4674	CG8730	FBgn0026722	drosha	13|17	30	15	2	0|0|0|0|0|0|0|0|0|0|0	1	20.97	150	0	Yes
CG4674	CG32217	FBgn0014037	Su(Tpl)	63|66	129	64.5	2	0|0|0|0|0|0|0|0|0|0|0	1	93.38	645	0	Yes
CG4674	CG4943	FBgn0029006	Smurf	39|37	76	38	2	0|0|0|0|0|0|0|0|0|0|0	1	56.13	380	0	Yes
CG4674	CG13400	FBgn0027490	D12	6|7	13	6.5	2	0|0|0|0|0|0|0|0|0|0|0	1	10.1	65	0	Yes
CG4674	CG6841	FBgn0036828	CG6841	12|16	28	14	2	6|0|3|3|2|0|1|0|0|0|3	0.91	1.48	3.5	0.01	Yes
CG4674	CG3312	FBgn0014024	Rnp4F	16|18	34	17	2	0|0|0|0|0|0|0|0|0|0|0	1	25.47	170	0	Yes
CG4674	CG6146	FBgn0004924	Top1	12|17	29	14.5	2	0|0|0|0|0|0|3|0|0|2|0	1	6.83	8.7	0	Yes
CG4674	CG10370	FBgn0028684	Rpt5	47|48	95	47.5	2	6|0|5|12|17|7|11|3|7|2|5	1	14.93	3.56	0	Yes
CG4674	CG7639	FBgn0033989	CG7639	8|8	16	8	2	0|0|0|0|0|0|0|0|0|0|0	1	13.29	80	0	Yes
CG4674	CG6322	FBgn0036733	U4-U6-60K	6|7	13	6.5	2	0|0|0|0|0|0|2|0|0|0|0	0.96	2.97	9.75	0.01	Yes
CG4674	CG17520	FBgn0264492	CkIIalpha	34|46	80	40	2	0|0|0|14|8|0|7|0|2|0|2	1	7.69	4.14	0	Yes
CG4674	CG8184	FBgn0030674	CG8184	6|10	16	8	2	0|0|0|0|0|0|0|0|0|0|0	1	10.1	80	0	Yes
CG4674	CG1677	FBgn0029941	CG1677	107|126	233	116.5	2	0|0|0|8|8|0|10|0|0|0|3	1	99.52	13.44	0	Yes
CG4674	CG1100	FBgn0028690	Rpn5	19|20	39	19.5	2	1|0|3|3|3|0|3|0|0|0|5	1	10.22	5.32	0	Yes
CG4674	CG7893	FBgn0040068	Vav	6|6	12	6	2	0|0|0|0|0|0|0|0|0|0|0	1	10.1	60	0	Yes
CG4674	CG5792	FBgn0032455	Pih1D1	17|17	34	17	2	0|0|0|4|3|0|2|0|0|0|0	1	9.84	5.67	0	Yes
CG4674	CG3416	FBgn0002787	Rpn8	25|25	50	25	2	0|0|0|5|5|0|3|0|0|0|4	1	14.04	5.36	0	Yes
CG4674	CG42236	FBgn0262114	RanBPM	63|67	130	65	2	0|0|0|2|3|0|0|0|0|0|0	1	59.19	39	0	Yes
CG4674	CG11621	FBgn0015278	Pi3K68D	9|8	17	8.5	2	0|0|0|0|0|0|0|0|0|0|0	1	13.29	85	0	Yes
CG4674	CG14478	FBgn0028953	CG14478	7|6	13	6.5	2	0|0|0|0|0|0|0|0|0|0|0	1	10.1	65	0	Yes
CG4674	CG3329	FBgn0023174	Prosbeta2	15|21	36	18	2	0|0|0|3|2|0|2|0|0|0|0	1	9.6	7.71	0	Yes
CG4674	CG9667	FBgn0037550	CG9667	9|7	16	8	2	0|0|0|1|1|0|0|0|0|0|0	1	6.18	12	0	Yes
CG4674	CG6137	FBgn0000146	aub	13|16	29	14.5	2	0|0|0|2|0|0|0|0|3|4|0	1	5.53	4.83	0	Yes
CG4674	CG10149	FBgn0028689	Rpn6	21|27	48	24	2	7|0|2|5|4|2|3|2|0|0|3	1	8.04	4.5	0	Yes
CG4674	CG1800	FBgn0039861	pasha	8|8	16	8	2	0|0|0|2|0|0|3|0|0|0|1	0.94	2.72	4	0.01	Yes
CG4674	CG5009	FBgn0027572	CG5009	21|18	39	19.5	2	0|0|0|0|0|0|0|0|0|0|0	1	28.44	195	0	Yes
CG4674	CG13892	FBgn0035141	Cypl	9|8	17	8.5	2	0|0|0|1|1|0|2|0|0|0|0	0.99	4.64	6.38	0	Yes
CG4674	CG1489	FBgn0020369	Rpt6	39|37	76	38	2	6|1|7|10|11|5|10|5|5|4|10	1	12.07	3.68	0	Yes
CG4674	CG5179	FBgn0019949	Cdk9	7|8	15	7.5	2	0|0|0|0|0|0|0|0|0|0|0	1	11.71	75	0	Yes
CG4674	CG3400	FBgn0027621	Pfrx	13|10	23	11.5	2	0|0|0|0|0|0|0|0|0|0|0	1	16.4	115	0	Yes
CG4674	CG4980	FBgn0039558	BCAS2	18|27	45	22.5	2	0|0|0|0|0|0|0|0|0|0|0	1	28.44	225	0	Yes
CG4674	CG12135	FBgn0040235	c12.1	10|14	24	12	2	0|0|0|0|0|0|6|0|0|0|0	0.89	1.71	6	0.01	Yes
CG4674	CG13957	FBgn0030739	SWIP	44|44	88	44	2	0|0|0|0|0|0|0|0|0|0|0	1	66.21	440	0	Yes
CG4674	CG7619	FBgn0015283	Rpn10	10|11	21	10.5	2	1|0|2|1|1|2|3|0|0|0|3	0.97	3.1	3.94	0.01	Yes
CG4674	CG6693	FBgn0037878	CG6693	8|9	17	8.5	2	0|0|0|0|0|0|2|0|0|0|3	0.97	3.04	5.1	0.01	Yes
CG4674	CG7057	FBgn0263351	AP-2mu	26|26	52	26	2	0|0|0|0|2|0|0|0|0|0|0	1	15.26	39	0	Yes
CG4674	CG2970	FBgn0034936	CG2970	11|11	22	11	2	0|0|0|2|3|0|2|0|0|0|0	0.99	5.11	4.71	0	Yes
CG4674	CG2807	FBgn0031266	Sf3b1	31|27	58	29	2	0|0|0|1|1|0|0|0|0|0|2	1	29.96	21.75	0	Yes
CG4674	CG13176	FBgn0033692	wash	45|41	86	43	2	0|0|0|0|0|0|0|0|0|0|0	1	61.89	430	0	Yes
CG4674	CG11734	FBgn0031107	HERC2	23|18	41	20.5	2	0|0|0|0|0|0|0|0|0|0|0	1	28.44	205	0	Yes
CG4674	CG6905	FBgn0265574	Cdc5	106|108	214	107	2	2|0|2|6|1|0|2|0|0|0|0	1	74.75	32.1	0	Yes
CG4674	CG3436	FBgn0031229	CG3436	8|10	18	9	2	0|0|0|2|1|0|2|0|0|0|0	0.99	3.61	5.4	0	Yes
CG4674	CG3431	FBgn0011327	Uch-L5	18|20	38	19	2	0|0|0|2|5|0|3|0|0|0|0	1	10.03	5.7	0	Yes
CG4674	CG3508	FBgn0038251	Hexim	78|139	217	108.5	2	0|0|0|0|0|0|0|0|0|0|0	1	114.74	1085	0	Yes
CG4674	CG6875	FBgn0000140	asp	14|13	27	13.5	2	0|0|0|0|0|0|0|0|0|0|0	1	20.97	135	0	Yes
CG4674	CG32082	FBgn0052082	IRSp53	6|6	12	6	2	0|0|0|0|0|0|0|0|0|0|0	1	10.1	60	0	Yes
CG4674	CG3342	FBgn0029874	CG3342	131|146	277	138.5	2	4|1|7|0|0|0|0|0|0|0|0	1	54.19	34.62	0	Yes
CG4674	CG3613	FBgn0022986	qkr58E-1	49|44	93	46.5	2	0|0|0|10|13|0|9|0|0|0|2	1	18.98	4.36	0	Yes
CG4674	CG18005	FBgn0037660	beag	11|15	26	13	2	0|0|0|2|2|0|4|0|0|0|0	0.99	4.23	4.88	0	Yes
CG4674	CG12702	FBgn0031070	CG12702	6|6	12	6	2	0|0|0|0|0|0|0|0|0|0|0	1	10.1	60	0	Yes
CG4674	CG7192	FBgn0030894	Mvb12	6|7	13	6.5	2	0|0|0|0|0|0|0|0|0|0|0	1	10.1	65	0	Yes
CG4674	CG14816	FBgn0023517	Pgam5	26|27	53	26.5	2	4|0|2|5|0|0|0|0|0|0|0	1	18.14	7.23	0	Yes
CG4674	CG7429	FBgn0031979	CCDC53	16|10	26	13	2	0|0|0|0|0|0|0|0|0|0|0	1	16.4	130	0	Yes
CG4674	CG10236	FBgn0002526	LanA	27|32	59	29.5	2	0|0|5|12|7|0|11|0|0|0|6	0.88	1.17	2.95	0.01	Yes
CG4674	CG6066	FBgn0039488	CG6066	7|13	20	10	2	0|0|0|0|0|0|3|0|0|0|0	0.95	2.21	10	0.01	Yes
CG4674	CG8392	FBgn0010590	Prosbeta1	14|13	27	13.5	2	0|0|0|2|2|0|3|0|0|0|0	1	7.3	5.79	0	Yes
CG4674	CG1603	FBgn0033185	CG1603	11|11	22	11	2	0|0|0|0|0|0|0|0|0|0|0	1	17.93	110	0	Yes
CG4674	CG31671	FBgn0031390	tho2	18|18	36	18	2	0|0|0|0|0|0|0|0|0|0|0	1	28.44	180	0	Yes
CG4674	CG10712	FBgn0044324	Chro	28|23	51	25.5	2	1|1|4|11|6|0|5|0|0|0|2	0.98	3.39	3.48	0	Yes
CG4674	CG10719	FBgn0010300	brat	39|43	82	41	2	0|0|0|3|4|0|0|0|0|0|0	1	20.24	17.57	0	Yes
CG4674	CG3605	FBgn0031493	Sf3b2	20|19	39	19.5	2	0|0|0|5|2|0|2|0|0|0|0	1	12.11	6.5	0	Yes
CG4674	CG3193	FBgn0000377	crn	25|25	50	25	2	3|0|0|0|0|0|0|0|0|0|0	1	9.01	25	0	Yes
CG4674	CG11198	FBgn0033246	ACC	14|21	35	17.5	2	0|0|0|3|2|0|6|0|0|0|5	0.93	1.85	3.75	0.01	Yes
CG4674	CG8383	FBgn0037737	Pnn	8|9	17	8.5	2	0|0|0|0|0|0|3|0|0|0|1	0.97	3.03	6.38	0.01	Yes
CG4674	CG1708	FBgn0000352	cos	19|22	41	20.5	2	0|0|0|0|0|0|0|0|0|0|0	1	29.92	205	0	Yes
CG4674	CG4244	FBgn0003557	Su(dx)	217|263	480	240	2	0|0|0|0|0|0|0|0|0|0|0	1	311.22	2400	0	Yes
CG4674	CG6815	FBgn0040237	bor	515|643	1158	579	2	32|1|24|39|32|31|28|10|33|24|17	1	510.04	16.7	0	Yes
CG4674	CG4886	FBgn0028382	cyp33	10|12	22	11	2	0|0|0|2|0|0|5|0|0|0|0	0.89	1.76	4.71	0.01	Yes
CG4674	CG11290	FBgn0034975	enok	21|23	44	22	2	0|0|0|0|0|0|0|0|0|0|0	1	32.87	220	0	Yes
CG4674	CG7441	FBgn0036763	TrpRS-m	9|9	18	9	2	0|0|3|1|1|0|2|0|0|0|1	0.98	3.82	4.5	0	Yes
CG4674	CG7668	FBgn0036929	CG7668	8|8	16	8	2	0|0|0|0|0|0|0|0|0|0|0	1	13.29	80	0	Yes
CG4674	CG1845	FBgn0033155	Br140	13|15	28	14	2	0|0|0|0|0|0|0|0|0|0|0	1	20.97	140	0	Yes
CG4674	CG9712	FBgn0036666	TSG101	14|11	25	12.5	2	2|0|4|4|3|0|3|0|0|0|1	0.89	1.29	3.41	0.01	Yes
CG4674	CG9577	FBgn0031092	CG9577	17|14	31	15.5	2	0|0|0|1|3|0|0|0|0|0|0	1	7.34	11.62	0	Yes
CG4674	CG5289	FBgn0015282	Rpt2	36|40	76	38	2	7|0|7|10|13|5|15|3|7|3|5	0.99	3.9	3	0	Yes
CG4674	CG17331	FBgn0032596	Prosbeta4	13|11	24	12	2	0|0|0|1|2|0|3|0|0|0|0	1	6	6	0	Yes
CG4674	CG9401	FBgn0002736	mago	13|11	24	12	2	0|0|0|0|0|0|0|0|0|0|0	1	17.93	120	0	Yes
CG4674	CG6718	FBgn0036053	iPLA2-VIA	15|17	32	16	2	0|0|0|0|2|0|3|0|0|0|0	1	9.8	9.6	0	Yes
CG4674	CG1622	FBgn0030468	CG1622	7|7	14	7	2	0|0|0|0|0|0|0|0|0|0|0	1	11.71	70	0	Yes
CG4674	CG7843	FBgn0033062	Ars2	75|75	150	75	2	0|0|0|14|11|0|8|0|0|2|4	1	51.61	6.82	0	Yes
CG4674	CG5726	FBgn0034313	CG5726	18|15	33	16.5	2	0|0|0|7|4|0|2|0|0|0|1	0.98	3.02	3.81	0.01	Yes
CG4674	CG11981	FBgn0026380	Prosbeta3	14|11	25	12.5	2	0|0|0|3|2|0|4|0|0|0|0	0.98	3.29	4.17	0	Yes
CG4674	CG33967	FBgn0262127	kibra	18|17	35	17.5	2	0|0|0|5|5|0|2|0|0|0|0	1	7.24	4.38	0	Yes
CG4674	CG14641	FBgn0037220	CG14641	13|12	25	12.5	2	0|0|0|1|1|0|0|0|0|0|0	1	13.25	18.75	0	Yes
CG4674	CG4097	FBgn0002284	Prosbeta6	19|21	40	20	2	3|0|1|4|2|0|6|0|2|4|0	1	7.64	4.29	0	Yes
CG4674	CG14228	FBgn0086384	Mer	10|12	22	11	2	0|0|0|0|0|0|0|0|0|0|0	1	16.4	110	0	Yes
CG4674	CG2713	FBgn0250874	ttm50	12|13	25	12.5	2	0|0|0|0|0|0|0|0|0|0|0	1	19.45	125	0	Yes
CG4674	CG4389	FBgn0028479	Mtpalpha	43|49	92	46	2	4|3|6|13|11|2|17|2|0|2|15	1	5.21	3.07	0	Yes
CG4674	CG6015	FBgn0038927	CG6015	18|18	36	18	2	0|0|0|0|0|0|0|0|0|0|0	1	28.44	180	0	Yes
CG4674	CG2028	FBgn0015024	CkIalpha	21|22	43	21.5	2	4|0|0|8|7|3|3|0|2|2|1	1	5.17	3.39	0	Yes
CG4674	CG1945	FBgn0005632	faf	9|7	16	8	2	0|0|0|0|0|0|0|0|0|0|0	1	11.71	80	0	Yes
CG4674	CG6701	FBgn0033889	CG6701	24|20	44	22	2	0|0|0|6|4|2|1|2|3|0|3	1	9.6	5.08	0	Yes
CG4674	CG2843	FBgn0031452	Cwc25	9|9	18	9	2	0|0|0|0|0|0|0|0|0|0|0	1	14.85	90	0	Yes
CG4674	CG8108	FBgn0027567	CG8108	7|6	13	6.5	2	0|0|0|0|0|0|0|0|0|0|0	1	10.1	65	0	Yes
CG4674	CG9985	FBgn0016984	sktl	6|6	12	6	2	0|0|0|0|0|0|0|0|0|0|0	1	10.1	60	0	Yes
CG4674	CG6509	FBgn0032363	Dlg5	143|157	300	150	2	6|0|15|27|32|1|11|1|8|8|10	1	24.31	6.08	0	Yes
CG4674	CG5931	FBgn0263599	l(3)72Ab	101|97	198	99	2	0|2|8|7|2|3|8|0|0|0|0	1	91.09	12.91	0	Yes
CG4674	CG8632	FBgn0033762	ZnT49B	9|10	19	9.5	2	0|0|0|0|0|0|0|0|0|0|0	1	14.85	95	0	Yes
CG4674	CG4260	FBgn0264855	AP-2alpha	44|52	96	48	2	4|1|7|5|5|0|4|0|0|2|5	1	32.71	8.47	0	Yes
CG4674	CG4069	FBgn0036301	CG4069	10|13	23	11.5	2	0|0|0|0|0|0|0|0|0|0|0	1	16.4	115	0	Yes
CG4674	CG11888	FBgn0028692	Rpn2	59|64	123	61.5	2	8|0|10|12|15|5|11|7|4|7|9	1	29.9	4.86	0	Yes
CG4674	CG2903	FBgn0031450	Hrs	10|12	22	11	2	0|0|0|2|0|0|0|0|0|0|2	1	10.63	8.25	0	Yes
CG4674	CG3496	FBgn0003977	vir	33|35	68	34	2	0|0|0|0|0|0|3|0|0|0|0	1	11.68	34	0	Yes
CG4674	CG7392	FBgn0044323	Cka	10|14	24	12	2	0|0|0|0|0|0|4|0|0|0|0	0.96	2.63	9	0.01	Yes
CG4674	CG7483	FBgn0037573	CG7483	26|34	60	30	2	0|0|0|4|2|0|0|0|0|0|0	1	11.77	15	0	Yes
CG4674	CG12343	FBgn0033556	CG12343	6|7	13	6.5	2	0|0|0|0|0|0|0|0|0|0|0	1	10.1	65	0	Yes
CG4674	CG2031	FBgn0037382	Hpr1	11|16	27	13.5	2	0|0|0|0|0|0|0|0|0|0|0	1	17.93	135	0	Yes
CG4674	CG9776	FBgn0027866	CG9776	17|24	41	20.5	2	0|0|0|0|0|0|0|0|0|0|0	1	26.96	205	0	Yes
CG4674	CG7139	FBgn0027532	CG7139	7|6	13	6.5	2	0|0|0|0|2|0|2|0|0|0|0	0.98	3.25	4.88	0	Yes
CG4674	CG6512	FBgn0036702	CG6512	38|43	81	40.5	2	1|0|3|4|3|4|4|2|3|6|4	1	29.02	8.68	0	Yes
CG4674	CG40351	FBgn0040022	Set1	19|26	45	22.5	2	0|0|0|0|0|0|0|0|0|0|0	1	29.92	225	0	Yes
CG4674	CG5704	FBgn0026570	CG5704	6|7	13	6.5	2	0|0|0|0|0|0|0|0|0|0|0	1	10.1	65	0	Yes
CG4674	CG10473	FBgn0263198	Acn	17|19	36	18	2	0|0|0|1|2|0|7|0|0|0|0	0.97	3.13	5.4	0.01	Yes
CG4674	CG14200	FBgn0031023	CG14200	20|22	42	21	2	0|0|0|0|0|0|6|0|0|0|0	0.98	3.81	10.5	0	Yes
CG4674	CG18214	FBgn0024277	trio	12|7	19	9.5	2	0|0|0|0|0|0|0|0|0|0|0	1	11.71	95	0	Yes
CG4674	CG32165	FBgn0042178	CG32165	10|9	19	9.5	2	0|0|0|2|1|0|0|0|0|0|0	1	7.18	9.5	0	Yes
CG4674	CG32164	FBgn0042177	CG32164	6|6	12	6	2	0|0|0|1|1|0|0|0|0|0|0	0.99	4.79	9	0	Yes
CG4674	CG3733	FBgn0250786	Chd1	14|10	24	12	2	0|0|0|0|0|0|0|0|0|0|0	1	16.4	120	0	Yes
CG4674	CG4297	FBgn0031258	CG4297	12|16	28	14	2	0|0|0|0|0|0|0|0|0|0|0	1	19.45	140	0	Yes
CG4674	CG7035	FBgn0022942	Cbp80	25|27	52	26	2	0|0|0|0|0|0|3|0|0|0|1	1	15.1	19.5	0	Yes
CG4674	CG2048	FBgn0002413	dco	11|10	21	10.5	2	0|0|0|3|4|0|0|0|0|0|0	0.94	2.41	4.5	0.01	Yes
CG4674	CG18076	FBgn0013733	shot	13|18	31	15.5	2	0|0|3|0|2|0|0|0|0|0|0	1	7.81	9.3	0	Yes
CG4674	CG12750	FBgn0086707	ncm	28|29	57	28.5	2	0|0|0|0|0|0|3|0|0|0|0	1	10.02	28.5	0	Yes
CG4674	CG12532	FBgn0010380	AP-1-2beta	57|54	111	55.5	2	0|0|3|4|7|0|4|0|0|0|3	1	47.6	11.1	0	Yes
CG4674	CG3455	FBgn0028685	Rpt4	17|24	41	20.5	2	6|2|2|3|4|1|5|1|0|0|3	0.99	4.42	4.1	0	Yes
CG4674	CG6292	FBgn0025455	CycT	12|12	24	12	2	0|0|0|0|0|0|5|0|0|0|0	0.93	2.62	7.2	0.01	Yes
CG4674	CG11228	FBgn0261456	hpo	21|19	40	20	2	4|0|5|3|4|3|0|1|3|1|2	1	8.53	4.62	0	Yes
CG4674	CG16941	FBgn0266917	Sf3a1	17|17	34	17	2	0|0|0|0|0|0|0|0|0|0|0	1	26.96	170	0	Yes
CG4674	CG6617	FBgn0030944	CG6617	7|6	13	6.5	2	0|0|0|0|0|0|0|0|0|0|0	1	10.1	65	0	Yes
CG4674	CG6343	FBgn0019957	ND-42	14|19	33	16.5	2	0|0|0|0|0|0|0|0|0|0|0	1	22.48	165	0	Yes
CG4674	CG8833	FBgn0036386	CG8833	15|14	29	14.5	2	0|0|0|0|0|0|0|0|0|0|0	1	22.48	145	0	Yes
CG4674	CG17494	FBgn0040011	Slmap	12|19	31	15.5	2	0|0|0|0|0|0|0|0|0|0|0	1	19.45	155	0	Yes
CG18748	CG10540	FBgn0034577	cpa	96|73	169	84.5	2	10|2|15|7|8|6|15|3|6|4|5	1	42.85	6.34	0	Yes
CG18748	CG8978	FBgn0001961	Arpc1	44|54	98	49	2	3|2|6|2|2|3|3|2|0|0|0	1	39.11	12.25	0	Yes
CG18748	CG31012	FBgn0027598	cindr	132|124	256	128	2	23|5|52|11|7|1|18|2|13|7|5	0.95	2.32	4.13	0.01	Yes
CG18748	CG13848	FBgn0038966	pinta	7|8	15	7.5	2	0|0|0|0|0|0|0|0|0|2|0	0.98	3.66	11.25	0	Yes
CG18748	CG8578	FBgn0030699	CG8578	62|53	115	57.5	2	5|0|4|2|3|0|3|0|0|0|3	1	50.77	14.38	0	Yes
CG18748	CG9881	FBgn0031437	Arpc5	58|52	110	55	2	0|0|0|1|3|0|0|0|2|0|0	1	60.37	27.5	0	Yes
CG18748	CG3722	FBgn0003391	shg	7|11	18	9	2	1|0|2|0|0|0|0|0|0|0|0	0.99	4.59	9	0	Yes
CG18748	CG1106	FBgn0010225	Gel	65|66	131	65.5	2	0|0|0|0|2|0|3|0|0|0|2	1	76.27	28.07	0	Yes
CG18748	CG9901	FBgn0011742	Arp2	116|106	222	111	2	9|2|12|3|1|0|4|0|5|4|6	1	96.78	12.33	0	Yes
CG18748	CG4145	FBgn0000299	Col4a1	12|8	20	10	2	0|0|0|0|0|0|0|0|2|0|0	0.99	4.34	15	0	Yes
CG18748	CG7438	FBgn0086347	Myo31DF	82|68	150	75	2	13|0|24|2|5|0|16|3|0|0|3	1	14.36	4.25	0	Yes
CG18748	CG1799	FBgn0003204	ras	11|8	19	9.5	2	0|0|0|3|2|0|2|0|0|0|0	0.92	1.75	4.07	0.01	Yes
CG18748	CG5436	FBgn0001230	Hsp68	60|48	108	54	2	11|0|11|11|13|0|13|0|9|0|13	1	17.02	4.15	0	Yes
CG18748	CG4560	FBgn0038369	Arpc3A	32|23	55	27.5	2	7|0|5|0|3|0|3|0|0|0|3	1	11.1	5.5	0	Yes
CG18748	CG18076	FBgn0013733	shot	53|33	86	43	2	0|0|3|0|2|0|0|0|0|0|0	1	28.19	25.8	0	Yes
CG18748	CG42328	FBgn0259228	C3G	12|9	21	10.5	2	0|0|0|0|0|0|0|0|0|0|0	1	14.85	105	0	Yes
CG18748	CG17158	FBgn0011570	cpb	70|59	129	64.5	2	9|0|12|3|2|3|5|3|2|1|5	1	31.81	7.44	0	Yes
CG18748	CG7546	FBgn0035793	CG7546	58|52	110	55	2	0|0|0|3|1|0|0|0|0|0|0	1	33.64	41.25	0	Yes
CG18748	CG3172	FBgn0038206	twf	6|8	14	7	2	0|0|0|0|0|0|0|0|0|0|0	1	10.1	70	0	Yes
CG18748	CG4183	FBgn0001225	Hsp26	11|8	19	9.5	2	1|0|3|0|0|0|2|0|0|0|2	0.92	1.75	4.07	0.01	Yes
CG18748	CG7478	FBgn0000045	Act79B	431|434	865	432.5	2	0|23|0|0|0|0|0|0|0|6|0	1	21.79	44.74	0	Yes
CG18748	CG7558	FBgn0262716	Arp3	54|52	106	53	2	7|1|10|9|9|1|6|2|4|3|3	1	30.8	5.68	0	Yes
CG18748	CG10360	FBgn0003231	ref(2)P	20|22	42	21	2	3|0|6|0|0|0|2|0|0|0|3	1	10.42	5.25	0	Yes
CG18748	CG10363	FBgn0041180	Tep4	166|137	303	151.5	2	0|0|3|15|10|0|26|0|0|0|7	1	20.63	8.91	0	Yes
CG18748	CG16858	FBgn0016075	vkg	20|15	35	17.5	2	0|0|0|0|0|0|0|0|0|0|0	1	23.98	175	0	Yes
CG18748	CG2146	FBgn0261397	didum	250|227	477	238.5	2	28|6|59|3|0|0|8|4|5|0|5	1	7	7.53	0	Yes
CG18748	CG2671	FBgn0002121	l(2)gl	8|6	14	7	2	0|0|0|2|0|0|0|0|0|0|0	0.97	2.97	10.5	0.01	Yes
CG18748	CG5972	FBgn0284255	Arpc4	12|10	22	11	2	2|1|2|0|0|0|3|0|2|1|3	0.98	3.1	4.12	0.01	Yes
CG18748	CG5336	FBgn0032409	Ced-12	14|11	25	12.5	2	2|0|2|2|2|0|0|0|0|0|0	1	6	6.25	0	Yes
CG18748	CG1539	FBgn0082582	tmod	43|37	80	40	2	5|0|7|1|3|0|6|0|0|0|2	1	23.54	6.67	0	Yes
CG18748	CG10522	FBgn0002466	sti	19|13	32	16	2	2|1|7|0|0|0|0|0|0|0|0	0.9	1.6	4.8	0.01	Yes
CG18748	CG33926	FBgn0053926	CG33926	20|8	28	14	2	0|0|0|0|0|0|0|0|0|0|0	1	13.29	140	0	Yes
CG18748	CG1822	FBgn0014133	bif	72|61	133	66.5	2	8|0|16|9|8|0|13|0|0|0|7	1	31.98	5.25	0	Yes
CG18748	CG9155	FBgn0010246	Myo61F	52|54	106	53	2	1|0|2|2|2|0|3|0|0|0|2	1	58.32	22.71	0	Yes
CG18748	CG6522	FBgn0034223	Tes	8|6	14	7	2	0|0|0|0|0|0|0|0|0|0|0	1	10.1	70	0	Yes
CG18748	CG10067	FBgn0000044	Act57B	121|129	250	125	2	30|0|45|15|13|10|19|0|0|3|11	1	4.95	3.99	0	Yes
CG18748	CG5020	FBgn0020503	CLIP-190	73|59	132	66	2	2|0|8|0|0|0|2|0|0|0|3	1	20.22	15.23	0	Yes
CG18748	CG5650	FBgn0004103	Pp1-87B	11|12	23	11.5	2	0|0|0|3|1|0|0|0|0|0|0	1	5.19	8.62	0	Yes
CG18748	CG1099	FBgn0023388	Dap160	20|20	40	20	2	0|0|0|0|0|0|0|0|0|0|0	1	31.4	200	0	Yes
CG18748	CG3595	FBgn0003514	sqh	195|168	363	181.5	2	14|2|8|4|1|2|8|2|0|0|7	1	184.8	18.15	0	Yes
CG18748	CG34417	FBgn0085446	CG34417	88|81	169	84.5	2	5|3|15|0|0|0|8|0|0|0|5	1	19.06	9.05	0	Yes
CG18748	CG10083	FBgn0036372	Abp1	7|8	15	7.5	2	0|0|0|2|0|0|0|0|0|0|0	0.98	3.66	11.25	0	Yes
CG18748	CG13345	FBgn0086356	tum	15|14	29	14.5	2	2|0|6|0|2|0|0|0|0|0|0	0.99	3.97	4.35	0	Yes
CG18748	CG1915	FBgn0086906	sls	11|8	19	9.5	2	0|0|0|0|0|0|3|0|0|0|0	0.96	2.66	9.5	0.01	Yes
CG18748	CG5695	FBgn0011225	jar	214|200	414	207	2	32|3|36|0|4|1|8|1|0|0|7	1	12.49	8.17	0	Yes
CG18748	CG10289	FBgn0035688	CG10289	36|19	55	27.5	2	2|0|3|2|0|0|4|0|0|0|0	1	12.11	9.17	0	Yes
CG18748	CG17286	FBgn0027500	spd-2	9|6	15	7.5	2	0|0|0|0|0|0|0|0|0|0|0	1	10.1	75	0	Yes
CG18748	CG16932	FBgn0035060	Eps-15	31|20	51	25.5	2	0|0|0|0|0|0|0|0|0|0|0	1	31.4	255	0	Yes
CG18748	CG8472	FBgn0000253	Cam	31|35	66	33	2	9|2|11|3|4|0|12|0|0|0|10	0.98	2.96	3	0.01	Yes
CG18748	CG5604	FBgn0032208	Ufd4	15|12	27	13.5	2	0|0|0|0|0|0|0|0|0|0|0	1	19.45	135	0	Yes
CG18748	CG9853	FBgn0086605	CG9853	10|10	20	10	2	0|0|0|0|0|0|0|0|0|0|0	1	16.4	100	0	Yes
CG18748	CG15437	FBgn0027609	morgue	8|7	15	7.5	2	0|0|0|3|2|0|0|0|0|0|0	0.92	2.13	4.5	0.01	Yes
CG18748	CG7595	FBgn0000317	ck	48|41	89	44.5	2	0|0|0|0|0|0|0|0|0|0|0	1	61.89	445	0	Yes
CG18748	CG2092	FBgn0261385	scra	11|12	23	11.5	2	1|1|2|0|0|0|5|0|0|0|1	0.96	2.9	4.31	0.01	Yes
CG18748	CG10954	FBgn0032859	Arpc2	42|43	85	42.5	2	2|0|4|0|3|0|3|0|2|0|2	1	39.53	12.75	0	Yes
CG18748	CG8547	FBgn0033919	CG8547	15|13	28	14	2	0|0|0|3|0|0|0|0|0|0|0	0.99	4.7	14	0	Yes
CG18748	CG45186	FBgn0266696	Svil	169|141	310	155	2	53|4|52|13|31|2|53|3|3|2|16	1	7.98	2.94	0	Yes
CG18748	CG6493	FBgn0034246	Dcr-2	6|7	13	6.5	2	0|0|0|3|0|0|0|0|0|0|0	0.88	1.74	6.5	0.01	Yes
CG18748	CG4853	FBgn0034230	CG4853	6|6	12	6	2	0|0|0|0|0|0|0|0|0|0|0	1	10.1	60	0	Yes
CG18748	CG13366	FBgn0025633	CG13366	15|11	26	13	2	0|0|0|0|0|0|0|0|0|0|0	1	17.93	130	0	Yes
CG18748	CG3637	FBgn0025865	Cortactin	58|55	113	56.5	2	0|1|11|7|8|0|10|0|2|1|2	1	33.15	5.84	0	Yes
CG18748	CG6137	FBgn0000146	aub	15|10	25	12.5	2	0|0|0|2|0|0|0|0|3|4|0	0.95	2.12	4.17	0.01	Yes
CG18748	CG43119	FBgn0262579	Ect4	34|33	67	33.5	2	6|3|11|5|4|0|5|0|2|2|2	1	12.9	4.57	0	Yes
CG18748	CG7029	FBgn0039026	CG7029	15|6	21	10.5	2	0|0|0|0|0|0|0|0|0|0|0	1	10.1	105	0	Yes
CG18748	CG9446	FBgn0265935	coro	56|41	97	48.5	2	4|0|10|7|4|0|8|0|1|1|3	1	21.71	5.82	0	Yes
CG18748	CG1412	FBgn0031118	RhoGAP19D	14|9	23	11.5	2	0|0|0|0|0|0|0|0|0|0|0	1	14.85	115	0	Yes
CG18748	CG1484	FBgn0000709	fliI	123|106	229	114.5	2	0|0|0|0|0|0|0|0|0|0|0	1	154.47	1145	0	Yes
CG18748	CG6593	FBgn0003134	Pp1alpha-96A	10|11	21	10.5	2	0|0|0|0|0|0|0|0|0|0|0	1	16.4	105	0	Yes
CG18748	CG7885	FBgn0026373	RpII33	10|11	21	10.5	2	0|0|0|2|2|0|0|0|0|0|0	1	10.63	7.88	0	Yes
CG18748	CG5178	FBgn0000047	Act88F	405|443	848	424	2	0|0|0|0|0|0|0|0|0|0|0	1	575.84	4240	0	Yes
CG18748	CG4376	FBgn0000667	Actn	43|38	81	40.5	2	3|0|2|4|1|0|6|0|0|0|1	1	30.25	9.35	0	Yes
CG10086	CG3907	FBgn0034958	CG3907	15|16	31	15.5	2	0|0|0|0|0|0|0|0|0|0|0	1	23.98	155	0	Yes
CG10086	CG7831	FBgn0002924	ncd	39|19	58	29	2	0|0|0|1|3|0|2|0|0|0|0	1	15.74	14.5	0	Yes
CG10086	CG17785	FBgn0039188	Golgin84	18|13	31	15.5	2	0|0|0|0|0|0|0|0|0|0|0	1	20.97	155	0	Yes
CG10086	CG8478	FBgn0037746	CG8478	10|10	20	10	2	0|0|0|2|0|0|2|0|0|0|3	0.98	4.03	4.29	0	Yes
CG10086	CG42279	FBgn0259174	Nedd4	208|140	348	174	2	0|0|0|2|0|0|2|0|0|0|0	1	513.35	130.5	0	Yes
CG10086	CG11680	FBgn0002774	mle	20|10	30	15	2	0|0|0|0|2|0|0|0|0|0|0	1	5.66	22.5	0	Yes
CG10086	CG12304	FBgn0036515	AIMP2	10|6	16	8	2	0|0|0|0|0|0|0|0|0|0|0	1	10.1	80	0	Yes
CG10086	CG7595	FBgn0000317	ck	34|11	45	22.5	2	0|0|0|0|0|0|0|0|0|0|0	1	17.93	225	0	Yes
CG10086	CG13472	FBgn0036450	Tdrd3	16|13	29	14.5	2	0|0|0|5|3|0|5|0|0|0|1	0.92	1.67	3.35	0.01	Yes
CG10086	CG9246	FBgn0032925	CG9246	6|7	13	6.5	2	0|0|0|0|0|0|0|0|0|0|0	1	10.1	65	0	Yes
CG10086	CG6551	FBgn0001079	fu	7|6	13	6.5	2	0|0|0|0|2|2|0|0|0|0|0	0.98	3.25	4.88	0	Yes
CG10086	CG42797	FBgn0261931	CG42797	63|53	116	58	2	0|0|0|0|0|0|0|0|0|0|0	1	79.1	580	0	Yes
CG10086	CG3666	FBgn0034094	Tsf3	8|9	17	8.5	2	0|0|0|0|0|0|0|0|0|0|0	1	13.29	85	0	Yes
CG10086	CG10354	FBgn0031868	Rat1	31|24	55	27.5	2	0|0|0|0|3|0|5|0|0|0|0	1	7.78	10.31	0	Yes
CG10086	CG12261	FBgn0039555	mRpS22	13|14	27	13.5	2	0|0|0|3|0|0|0|0|0|0|0	0.99	4.7	13.5	0	Yes
CG10086	CG8939	FBgn0030720	CG8939	11|7	18	9	2	0|0|0|0|0|0|2|0|0|0|0	0.99	3.66	13.5	0	Yes
CG10086	CG32075	FBgn0052075	CG32075	12|10	22	11	2	0|0|0|0|0|0|0|0|0|0|0	1	16.4	110	0	Yes
CG10086	CG18249	FBgn0037553	CG18249	31|39	70	35	2	0|0|0|0|0|0|0|0|0|0|0	1	47.46	350	0	Yes
CG10086	CG15100	FBgn0034401	MetRS	36|27	63	31.5	2	1|0|2|9|5|0|8|0|0|0|4	1	9.2	4.3	0	Yes
CG10086	CG11583	FBgn0035524	CG11583	18|13	31	15.5	2	0|0|0|0|2|0|7|0|0|0|0	0.9	1.75	5.17	0.01	Yes
CG10086	CG2253	FBgn0029992	Upf2	16|12	28	14	2	0|0|0|0|0|0|0|0|0|0|0	1	19.45	140	0	Yes
CG10086	CG2982	FBgn0266570	CG2982	37|34	71	35.5	2	0|0|0|2|0|0|18|0|0|0|0	0.93	2.54	5.33	0.01	Yes
CG10086	CG12076	FBgn0027616	YT521-B	15|10	25	12.5	2	0|0|0|0|2|0|0|0|0|0|0	1	5.66	18.75	0	Yes
CG10086	CG5206	FBgn0023097	bon	15|16	31	15.5	2	0|0|0|3|1|0|0|0|0|0|0	1	8.06	11.62	0	Yes
CG10086	CG8994	FBgn0000615	exu	11|7	18	9	2	0|0|0|0|0|0|0|0|0|0|0	1	11.71	90	0	Yes
CG10086	CG5336	FBgn0032409	Ced-12	8|7	15	7.5	2	2|0|2|2|2|0|0|0|0|0|0	0.88	1.56	3.75	0.01	Yes
CG10086	CG9004	FBgn0035336	CG9004	13|12	25	12.5	2	0|0|0|0|0|0|0|0|0|0|0	1	19.45	125	0	Yes
CG10086	CG4554	FBgn0034734	CG4554	25|17	42	21	2	0|0|0|0|0|0|0|0|0|0|0	1	26.96	210	0	Yes
CG10086	CG4170	FBgn0024183	vig	16|14	30	15	2	0|0|0|1|2|0|4|0|0|0|0	1	8.44	6.43	0	Yes
CG10086	CG10192	FBgn0260634	eIF4G2	23|18	41	20.5	2	0|0|0|1|2|0|2|0|0|0|0	1	15.94	12.3	0	Yes
CG10086	CG4943	FBgn0029006	Smurf	68|51	119	59.5	2	0|0|0|0|0|0|0|0|0|0|0	1	76.24	595	0	Yes
CG10086	CG32675	FBgn0052675	Tango5	13|8	21	10.5	2	0|0|0|2|3|0|0|0|0|0|0	0.98	3.04	6.3	0.01	Yes
CG10086	CG5824	FBgn0010926	l(3)07882	14|7	21	10.5	2	0|0|0|0|0|0|0|0|0|0|0	1	11.71	105	0	Yes
CG10086	CG2691	FBgn0030504	CG2691	37|27	64	32	2	0|0|0|0|0|0|3|0|0|0|1	1	16.49	24	0	Yes
CG10086	CG8710	FBgn0033265	coil	29|20	49	24.5	2	0|0|0|0|0|0|2|0|0|0|0	1	11.77	36.75	0	Yes
CG10086	CG3249	FBgn0263987	spoon	14|8	22	11	2	0|0|0|0|0|0|0|0|0|0|0	1	13.29	110	0	Yes
CG10086	CG5366	FBgn0027568	Cand1	33|20	53	26.5	2	0|0|0|6|0|0|0|0|0|0|0	0.99	3.81	13.25	0	Yes
CG10086	CG2807	FBgn0031266	Sf3b1	30|9	39	19.5	2	0|0|0|1|1|0|0|0|0|0|2	1	5.85	14.62	0	Yes
CG10086	CG6474	FBgn0000617	e(y)1	10|8	18	9	2	2|1|2|0|2|0|0|0|0|0|0	0.97	2.72	4.5	0.01	Yes
CG10086	CG8414	FBgn0034073	CG8414	32|32	64	32	2	0|0|0|0|0|0|0|0|0|0|0	1	48.91	320	0	Yes
CG10086	CG6905	FBgn0265574	Cdc5	13|13	26	13	2	2|0|2|6|1|0|2|0|0|0|0	0.96	3.17	3.9	0.01	Yes
CG10086	CG6875	FBgn0000140	asp	31|16	47	23.5	2	0|0|0|0|0|0|0|0|0|0|0	1	25.47	235	0	Yes
CG10086	CG2212	FBgn0003656	sws	32|28	60	30	2	0|0|0|0|0|0|0|0|0|0|0	1	43.1	300	0	Yes
CG10086	CG5821	FBgn0022985	qkr58E-2	38|28	66	33	2	0|0|0|4|7|0|9|0|0|0|2	1	12.15	4.95	0	Yes
CG10086	CG7194	FBgn0035868	CG7194	7|8	15	7.5	2	0|0|0|0|0|0|0|0|0|0|0	1	11.71	75	0	Yes
CG10086	CG3983	FBgn0038473	Ns1	19|9	28	14	2	0|0|0|1|1|0|2|0|0|0|1	1	5.85	10.5	0	Yes
CG10086	CG7993	FBgn0038585	Non3	10|7	17	8.5	2	0|0|0|0|0|0|4|0|0|0|0	0.88	1.6	6.38	0.01	Yes
CG10086	CG31671	FBgn0031390	tho2	11|8	19	9.5	2	0|0|0|0|0|0|0|0|0|0|0	1	13.29	95	0	Yes
CG10086	CG42551	FBgn0261618	larp	57|49	106	53	2	3|0|7|9|7|0|11|0|0|0|6	1	28.45	5.89	0	Yes
CG10086	CG3606	FBgn0285954	caz	30|20	50	25	2	0|0|0|0|0|0|8|0|0|0|0	0.97	3.01	9.38	0.01	Yes
CG10086	CG14805	FBgn0023514	CG14805	15|12	27	13.5	2	0|0|0|0|0|0|2|0|0|0|0	1	6.93	20.25	0	Yes
CG10086	CG3779	FBgn0002973	numb	11|9	20	10	2	0|0|0|0|0|0|0|0|0|0|0	1	14.85	100	0	Yes
CG10086	CG12396	FBgn0022069	Nnp-1	25|34	59	29.5	2	0|0|0|0|0|0|3|0|0|0|0	1	9.01	29.5	0	Yes
CG10086	CG2009	FBgn0026262	bip2	9|7	16	8	2	0|0|0|0|0|0|3|0|0|0|0	0.93	2.21	8	0.01	Yes
CG10086	CG1451	FBgn0015589	Apc	8|6	14	7	2	0|0|0|0|0|0|0|0|0|0|3	0.89	1.74	7	0.01	Yes
CG10086	CG8547	FBgn0033919	CG8547	13|14	27	13.5	2	0|0|0|3|0|0|0|0|0|0|0	0.99	4.7	13.5	0	Yes
CG10086	CG8611	FBgn0027602	CG8611	16|9	25	12.5	2	0|0|0|0|0|0|4|0|0|0|0	0.95	2.3	9.38	0.01	Yes
CG10086	CG14650	FBgn0037252	CG14650	19|19	38	19	2	0|0|0|4|0|0|0|0|0|0|0	0.99	5.24	14.25	0	Yes
CG10086	CG4399	FBgn0261954	east	49|50	99	49.5	2	2|0|2|6|7|0|8|0|0|0|0	1	34.18	7.07	0	Yes
CG10086	CG11290	FBgn0034975	enok	13|9	22	11	2	0|0|0|0|0|0|0|0|0|0|0	1	14.85	110	0	Yes
CG10086	CG2941	FBgn0029686	CG2941	12|10	22	11	2	0|0|0|0|0|0|0|0|0|0|0	1	16.4	110	0	Yes
CG10086	CG9881	FBgn0031437	Arpc5	10|12	22	11	2	0|0|0|1|3|0|0|0|2|0|0	1	4.89	5.5	0	Yes
CG10086	CG5726	FBgn0034313	CG5726	16|22	38	19	2	0|0|0|7|4|0|2|0|0|0|1	0.99	3.98	4.38	0	Yes
CG10086	CG5728	FBgn0039182	CG5728	17|16	33	16.5	2	0|0|0|0|0|0|0|0|0|0|0	1	25.47	165	0	Yes
CG10086	CG33217	FBgn0053217	CG33217	15|12	27	13.5	2	0|0|0|0|0|0|0|0|0|0|0	1	19.45	135	0	Yes
CG10086	CG2025	FBgn0030344	Nrd1	6|6	12	6	2	0|0|0|1|1|0|2|0|0|0|0	0.91	2.33	4.5	0.01	Yes
CG10086	CG6701	FBgn0033889	CG6701	38|29	67	33.5	2	0|0|0|6|4|2|1|2|3|0|3	1	19.49	7.73	0	Yes
CG10086	CG1091	FBgn0037470	Tailor	18|10	28	14	2	0|0|0|0|0|0|0|0|0|0|0	1	16.4	140	0	Yes
CG10086	CG7483	FBgn0037573	CG7483	11|13	24	12	2	0|0|0|4|2|0|0|0|0|0|0	0.98	3.29	6	0.01	Yes
CG10086	CG12749	FBgn0004237	Hrb87F	27|20	47	23.5	2	0|0|0|3|4|0|5|0|0|0|0	1	10.42	5.88	0	Yes
CG10086	CG10042	FBgn0038016	MBD-R2	9|6	15	7.5	2	0|0|0|0|0|0|0|0|0|0|0	1	10.1	75	0	Yes
CG10086	CG7035	FBgn0022942	Cbp80	7|7	14	7	2	0|0|0|0|0|0|3|0|0|0|1	0.91	2.31	5.25	0.01	Yes
CG10086	CG18076	FBgn0013733	shot	9|7	16	8	2	0|0|3|0|2|0|0|0|0|0|0	0.94	2.13	4.8	0.01	Yes
CG10086	CG6501	FBgn0034243	Ns2	29|6	35	17.5	2	0|0|0|2|2|0|0|0|0|0|0	0.98	3.25	13.12	0	Yes
CG10086	CG4619	FBgn0032166	CG4619	14|10	24	12	2	0|0|0|0|0|0|0|0|0|0|0	1	16.4	120	0	Yes
CG18744	CG12261	FBgn0039555	mRpS22	8|11	19	9.5	2	0|0|0|3|0|0|0|0|0|0|0	0.96	2.66	9.5	0.01	Yes
CG18744	CG6905	FBgn0265574	Cdc5	13|11	24	12	2	2|0|2|6|1|0|2|0|0|0|0	0.88	1.42	3.6	0.01	Yes
CG18744	CG5336	FBgn0032409	Ced-12	14|10	24	12	2	2|0|2|2|2|0|0|0|0|0|0	1	4.89	6	0	Yes
CG18744	CG6701	FBgn0033889	CG6701	16|20	36	18	2	0|0|0|6|4|2|1|2|3|0|3	1	5.2	4.15	0	Yes
CG18744	CG1091	FBgn0037470	Tailor	9|8	17	8.5	2	0|0|0|0|0|0|0|0|0|0|0	1	13.29	85	0	Yes
CG18744	CG7993	FBgn0038585	Non3	9|9	18	9	2	0|0|0|0|0|0|4|0|0|0|0	0.91	2.3	6.75	0.01	Yes
CG18744	CG11107	FBgn0033160	Dhx15	11|14	25	12.5	2	3|0|2|3|2|0|4|0|0|2|1	0.95	2.31	3.75	0.01	Yes
CG18744	CG4918	FBgn0003274	RpLP2	36|28	64	32	2	4|0|4|5|6|2|5|3|0|0|5	1	15.52	6	0	Yes
CG18744	CG5824	FBgn0010926	l(3)07882	6|8	14	7	2	0|0|0|0|0|0|0|0|0|0|0	1	10.1	70	0	Yes
CG18744	CG6693	FBgn0037878	CG6693	10|17	27	13.5	2	0|0|0|0|0|0|2|0|0|0|3	1	4.91	8.1	0	Yes
CG18744	CG33505	FBgn0053505	U3-55K	12|8	20	10	2	0|0|0|0|0|0|0|0|0|0|0	1	13.29	100	0	Yes
CG2641	CG9393	FBgn0037710	CG9393	6|7	13	6.5	2	0|0|0|0|0|0|0|0|0|0|0	1	10.1	65	0	Yes
CG2641	CG7668	FBgn0036929	CG7668	19|17	36	18	2	0|0|0|0|0|0|0|0|0|0|0	1	26.96	180	0	Yes
CG2641	CG3722	FBgn0003391	shg	11|6	17	8.5	2	1|0|2|0|0|0|0|0|0|0|0	0.98	3.33	8.5	0	Yes
CG2641	CG9712	FBgn0036666	TSG101	22|21	43	21.5	2	2|0|4|4|3|0|3|0|0|0|1	1	12.4	5.86	0	Yes
CG2641	CG9900	FBgn0004643	Zw10	13|11	24	12	2	0|0|0|0|0|0|0|0|0|0|0	1	17.93	120	0	Yes
CG2641	CG15099	FBgn0034400	CG15099	22|20	42	21	2	0|0|0|0|0|0|0|0|0|0|0	1	31.4	210	0	Yes
CG2641	CG14641	FBgn0037220	CG14641	8|7	15	7.5	2	0|0|0|1|1|0|0|0|0|0|0	1	6.18	11.25	0	Yes
CG2641	CG5366	FBgn0027568	Cand1	27|29	56	28	2	0|0|0|6|0|0|0|0|0|0|0	0.99	5.04	14	0	Yes
CG2641	CG4004	FBgn0030418	CG4004	16|8	24	12	2	0|0|0|0|0|0|0|0|0|0|0	1	13.29	120	0	Yes
CG2641	CG6757	FBgn0040475	SH3PX1	10|15	25	12.5	2	0|0|0|3|0|0|0|0|0|0|0	0.98	3.51	12.5	0	Yes
CG2641	CG44159	FBgn0265042	Irk1	15|14	29	14.5	2	0|0|0|2|2|0|0|0|0|0|0	1	19.57	10.88	0	Yes
CG2641	CG32435	FBgn0021760	chb	11|13	24	12	2	0|0|0|0|0|0|0|0|0|0|0	1	17.93	120	0	Yes
CG2641	CG8487	FBgn0264560	garz	10|9	19	9.5	2	0|0|0|0|0|0|0|0|0|0|0	1	14.85	95	0	Yes
CG2641	CG12070	FBgn0000416	Sap-r	10|9	19	9.5	2	0|0|0|0|0|0|0|0|0|0|0	1	14.85	95	0	Yes
CG2641	CG5092	FBgn0021796	Tor	11|6	17	8.5	2	0|0|0|0|0|0|0|0|0|0|0	1	10.1	85	0	Yes
CG2641	CG16858	FBgn0016075	vkg	10|6	16	8	2	0|0|0|0|0|0|0|0|0|0|0	1	10.1	80	0	Yes
CG2641	CG5252	FBgn0037894	Ranbp9	17|12	29	14.5	2	2|1|3|4|2|0|0|0|0|3|0	0.98	3.48	4.35	0	Yes
CG2641	CG1569	FBgn0003268	rod	17|12	29	14.5	2	0|0|0|2|0|0|0|0|0|0|0	1	6.93	21.75	0	Yes
CG2641	CG34349	FBgn0266719	stac	9|6	15	7.5	2	0|0|0|0|2|0|0|0|0|0|0	0.97	2.97	11.25	0.01	Yes
CG2641	CG5794	FBgn0039214	puf	21|16	37	18.5	2	0|0|0|0|0|0|0|0|0|0|0	1	25.47	185	0	Yes
CG2641	CG8814	FBgn0031478	CG8814	12|10	22	11	2	0|0|0|0|0|0|0|0|0|0|0	1	16.4	110	0	Yes
CG2641	CG8494	FBgn0033916	Usp20-33	7|6	13	6.5	2	0|0|0|0|0|0|0|0|0|0|0	1	10.1	65	0	Yes
CG2641	CG10192	FBgn0260634	eIF4G2	12|7	19	9.5	2	0|0|0|1|2|0|2|0|0|0|0	0.96	2.52	5.7	0.01	Yes
CG2641	CG11943	FBgn0031078	Nup205	15|12	27	13.5	2	3|0|2|2|0|0|5|0|0|0|0	0.98	3.48	4.05	0	Yes
CG2641	CG33554	FBgn0053554	Nipped-A	21|11	32	16	2	0|0|0|0|0|0|0|0|0|0|0	1	17.93	160	0	Yes
CG2641	CG42279	FBgn0259174	Nedd4	54|49	103	51.5	2	0|0|0|2|0|0|2|0|0|0|0	1	128.87	38.62	0	Yes
CG2641	CG6842	FBgn0283469	Vps4	31|25	56	28	2	11|1|11|5|4|4|5|2|2|3|5	0.89	1.22	3.11	0.01	Yes
CG2641	CG18729	FBgn0061476	Zwilch	12|7	19	9.5	2	0|0|0|2|0|0|0|0|0|0|0	0.99	3.66	14.25	0	Yes
CG2641	CG31729	FBgn0051729	CG31729	11|11	22	11	2	0|0|3|2|0|0|2|0|0|0|0	0.99	5.11	4.71	0	Yes
CG2641	CG11897	FBgn0039644	CG11897	7|8	15	7.5	2	1|0|2|0|0|0|0|0|0|0|0	0.99	4.59	7.5	0	Yes
CG2641	CG10954	FBgn0032859	Arpc2	12|11	23	11.5	2	2|0|4|0|3|0|3|0|2|0|2	0.94	2.31	3.45	0.01	Yes
CG2641	CG8547	FBgn0033919	CG8547	7|6	13	6.5	2	0|0|0|3|0|0|0|0|0|0|0	0.88	1.74	6.5	0.01	Yes
CG2641	CG32165	FBgn0042178	CG32165	10|7	17	8.5	2	0|0|0|2|1|0|0|0|0|0|0	0.99	4.59	8.5	0	Yes
CG2641	CG4554	FBgn0034734	CG4554	17|9	26	13	2	0|0|0|0|0|0|0|0|0|0|0	1	14.85	130	0	Yes
CG2641	CG9696	FBgn0020306	dom	15|11	26	13	2	0|0|0|0|0|0|0|0|0|0|0	1	17.93	130	0	Yes
CG2641	CG8683	FBgn0031985	mon2	15|9	24	12	2	0|0|0|0|0|0|0|0|0|0|0	1	14.85	120	0	Yes
CG2641	CG2691	FBgn0030504	CG2691	13|9	22	11	2	0|0|0|0|0|0|3|0|0|0|1	0.99	3.75	8.25	0	Yes
CG2641	CG42797	FBgn0261931	CG42797	17|17	34	17	2	0|0|0|0|0|0|0|0|0|0|0	1	26.96	170	0	Yes
CG2641	CG7744	FBgn0034447	CG7744	12|7	19	9.5	2	0|0|0|0|0|0|0|0|0|0|0	1	11.71	95	0	Yes
CG2641	CG14472	FBgn0011230	poe	85|74	159	79.5	2	5|0|5|2|2|4|3|0|4|1|2	1	75.24	17.04	0	Yes
CG2641	CG34407	FBgn0085436	Not1	20|11	31	15.5	2	0|0|0|0|0|0|0|0|0|0|0	1	17.93	155	0	Yes
CG2641	CG4244	FBgn0003557	Su(dx)	7|12	19	9.5	2	0|0|0|0|0|0|0|0|0|0|0	1	11.71	95	0	Yes
CG2641	CG12132	FBgn0040236	c11.1	9|7	16	8	2	0|0|0|0|0|0|0|0|0|0|0	1	11.71	80	0	Yes
CG18747	CG9393	FBgn0037710	CG9393	1|2	3	1.5	2	0|0|0|0|0|0|0|0|0|0|0	0.48	1.17	15	0.17
CG18747	CG42668	FBgn0261550	CG42668	3|0	3	1.5	2	0|0|0|2|1|0|3|0|0|0|2	0	-10.06	0.64	0.46
CG18747	CG40042	FBgn0267976	Tim23	0|2	2	1	2	0|0|0|3|3|3|0|0|0|0|0	0	-12.88	0.33	0.54
CG18747	CG7546	FBgn0035793	CG7546	6|0	6	3	2	0|0|0|3|1|0|0|0|0|0|0	0.42	-5.74	2.25	0.27
CG18747	CG12165	FBgn0260991	Incenp	4|0	4	2	2	0|0|0|0|0|0|16|0|0|0|0	0	-21.9	0.38	0.59
CG18747	CG5352	FBgn0262601	SmB	2|0	2	1	2	6|0|2|4|5|3|14|0|2|0|2	0	-35.99	0.12	0.7
CG18747	CG9012	FBgn0000319	Chc	12|7	19	9.5	2	5|5|17|34|24|0|26|0|0|2|11	0	-99.62	0.34	0.69
CG18747	CG6095	FBgn0266668	Exo84	2|2	4	2	2	0|0|0|0|0|0|0|0|0|0|0	0.96	3.2	20	0.01
CG18747	CG12163	FBgn0260462	CG12163	4|4	8	4	2	1|0|2|3|4|2|4|0|3|1|3	0	-8.01	1.09	0.52
CG18747	CG1848	FBgn0283712	LIMK1	0|2	2	1	2	0|0|0|0|0|0|0|0|0|0|0	0.48	-1.34	10	0.17
CG18747	CG10540	FBgn0034577	cpa	21|12	33	16.5	2	10|2|15|7|8|6|15|3|6|4|5	0	-30.5	1.24	0.63
CG18747	CG10811	FBgn0023213	eIF4G1	25|25	50	25	2	14|5|19|70|75|11|36|7|14|20|30	0	-188.7	0.41	0.7
CG18747	CG11181	FBgn0000392	cup	2|0	2	1	2	0|0|0|6|6|0|3|0|0|0|0	0	-21.63	0.2	0.62
CG18747	CG3949	FBgn0015393	hoip	2|3	5	2.5	2	3|0|2|4|3|2|50|2|2|1|3	0	-74.26	0.13	0.7
CG18747	CG5562	FBgn0024234	gbb	3|2	5	2.5	2	0|0|0|1|1|0|0|0|0|0|0	0.55	-0.38	3.75	0.06
CG18747	CG7144	FBgn0025687	LKRSDH	2|2	4	2	2	0|0|6|16|12|3|10|4|0|3|6	0	-48.5	0.16	0.7
CG18747	CG9712	FBgn0036666	TSG101	5|2	7	3.5	2	2|0|4|4|3|0|3|0|0|0|1	0	-11.12	0.95	0.5
CG18747	CG9710	FBgn0021768	nudC	2|0	2	1	2	0|0|0|0|0|0|2|0|0|0|3	0.01	-7.26	0.6	0.43
CG18747	CG4625	FBgn0040212	Dhap-at	0|2	2	1	2	0|0|0|0|0|0|0|0|0|0|0	0.48	-1.34	10	0.17
CG18747	CG17068	FBgn0031098	CG17068	9|2	11	5.5	2	0|0|0|7|6|0|5|0|0|0|0	0	-20.34	0.92	0.55
CG18747	CG12262	FBgn0035811	CG12262	6|4	10	5	2	11|0|10|7|7|6|6|7|8|6|4	0	-30.79	0.52	0.7
CG18747	CG31651	FBgn0031681	pgant5	2|3	5	2.5	2	0|0|0|0|0|0|0|0|1|1|0	0.55	-0.38	3.75	0.06
CG18747	CG8309	FBgn0033902	eIF3m	2|1	3	1.5	2	2|0|2|8|8|2|4|3|1|2|4	0	-25.73	0.22	0.7
CG18747	CG14048	FBgn0040389	mRpL14	1|2	3	1.5	2	3|0|4|5|2|3|4|3|2|0|4	0	-15.87	0.35	0.7
CG18747	CG12264	FBgn0032393	CG12264	9|8	17	8.5	2	11|0|5|20|16|23|7|5|10|10|5	0	-62.45	0.43	0.7
CG18747	CG6782	FBgn0037912	sea	4|5	9	4.5	2	3|0|2|5|5|2|0|2|5|4|0	0	-12.71	0.9	0.57
CG18747	CG16901	FBgn0263396	sqd	6|2	8	4	2	2|0|7|7|4|0|8|0|2|2|5	0	-25.86	0.55	0.63
CG18747	CG6621	FBgn0037855	CG6621	2|0	2	1	2	0|0|0|0|0|0|0|0|0|0|0	0.48	-1.34	10	0.17
CG18747	CG3401	FBgn0003888	betaTub60D	31|27	58	29	2	64|0|87|80|55|74|52|34|20|22|9	0	-267.29	0.36	0.7
CG18747	CG12008	FBgn0004167	kst	365|246	611	305.5	2	151|27|241|31|13|16|113|22|55|44|34	0	-250.14	1.81	0.69
CG18747	CG31712	FBgn0051712	CG31712	0|2	2	1	2	0|0|0|0|0|0|0|0|0|0|0	0.48	-1.34	10	0.17
CG18747	CG1939	FBgn0037469	Dpck	1|1	2	1	2	3|0|3|0|0|4|1|2|2|1|1	0	-11.77	0.3	0.7
CG18747	CG31716	FBgn0051716	Cnot4	4|2	6	3	2	0|0|0|0|0|0|0|0|0|0|0	0.98	3.2	30	0
CG18747	CG5289	FBgn0015282	Rpt2	10|9	19	9.5	2	7|0|7|10|13|5|15|3|7|3|5	0	-32.89	0.75	0.66
CG18747	CG1444	FBgn0029975	spidey	3|0	3	1.5	2	4|0|5|2|0|4|3|2|2|4|3	0	-18.74	0.35	0.58
CG18747	CG1528	FBgn0028968	gammaCOP	5|3	8	4	2	4|0|2|7|6|0|3|0|4|3|2	0	-16.96	0.71	0.6
CG18747	CG13392	FBgn0032033	CG13392	2|0	2	1	2	0|0|0|0|0|2|0|2|0|0|0	0.03	-5.93	0.75	0.4
CG18747	CG11700	FBgn0029856	CG11700	1|1	2	1	2	0|0|0|0|0|0|0|0|0|0|0	0	1.17	10	0.7
CG18747	CG1527	FBgn0004404	RpS14b	9|7	16	8	2	9|0|7|13|13|13|10|9|10|8|7	0	-37.84	0.62	0.7
CG18747	CG4046	FBgn0034743	RpS16	9|9	18	9	2	14|0|14|13|16|20|14|10|15|9|12	0	-49.61	0.53	0.7
CG18747	CG11274	FBgn0036340	SRm160	1|2	3	1.5	2	0|0|0|0|2|0|2|0|0|0|0	0.03	-4.24	1.12	0.4
CG18747	CG2331	FBgn0261014	TER94	8|8	16	8	2	10|0|14|39|33|3|34|4|3|1|20	0	-127.99	0.23	0.7
CG18747	CG11276	FBgn0011284	RpS4	15|5	20	10	2	11|1|3|29|25|10|22|6|9|5|7	0	-93.93	0.39	0.69
CG18747	CG31012	FBgn0027598	cindr	81|50	131	65.5	2	23|5|52|11|7|1|18|2|13|7|5	0	-40.54	2.11	0.61
CG18747	CG11271	FBgn0260441	RpS12	1|1	2	1	2	0|0|0|1|1|0|1|0|0|0|1	0	-2.97	1	0.7
CG18747	CG5885	FBgn0025700	CG5885	1|1	2	1	2	0|0|0|0|2|0|1|0|1|1|1	0	-4.17	0.75	0.7
CG18747	CG9156	FBgn0003132	Pp1-13C	3|1	4	2	2	0|0|0|0|0|0|0|0|0|0|0	0.5	1.17	20	0.12
CG18747	CG6303	FBgn0266717	Bruce	2|0	2	1	2	0|0|0|0|0|0|0|0|0|0|0	0.48	-1.34	10	0.17
CG18747	CG10445	FBgn0037531	CG10445	0|2	2	1	2	0|0|0|0|0|1|0|1|0|0|0	0.2	-3.38	1.5	0.33
CG18747	CG8977	FBgn0015019	CCT3	2|0	2	1	2	4|3|7|7|8|1|13|1|0|0|8	0	-42.34	0.1	0.7
CG18747	CG8274	FBgn0013756	Mtor	5|3	8	4	2	6|1|12|95|90|6|42|4|4|0|31	0	-321.79	0.05	0.7
CG18747	CG8578	FBgn0030699	CG8578	4|6	10	5	2	5|0|4|2|3|0|3|0|0|0|3	0	-9.19	1.25	0.5
CG18747	CG11982	FBgn0037653	CG11982	1|2	3	1.5	2	0|0|0|0|0|0|0|0|0|0|0	0.48	1.17	15	0.17
CG18747	CG8571	FBgn0016983	smid	4|0	4	2	2	0|0|0|9|11|2|4|1|0|0|0	0	-34.77	0.25	0.65
CG18747	CG9888	FBgn0003062	Fib	4|5	9	4.5	2	5|0|10|44|33|5|111|2|5|4|14	0	-259.34	0.07	0.7
CG18747	CG12217	FBgn0003139	PpV	2|0	2	1	2	0|0|0|0|0|0|1|0|0|0|1	0.2	-3.38	1.5	0.33
CG18747	CG4414	FBgn0040091	Ugt58Fa	2|1	3	1.5	2	0|1|2|9|3|0|1|0|1|3|1	0	-18.29	0.3	0.61
CG18747	CG10077	FBgn0035720	CG10077	7|4	11	5.5	2	0|0|4|20|23|0|17|0|0|0|5	0	-74.02	0.28	0.68
CG18747	CG1622	FBgn0030468	CG1622	2|0	2	1	2	0|0|0|0|0|0|0|0|0|0|0	0.48	-1.34	10	0.17
CG18747	CG3539	FBgn0264978	Slh	2|0	2	1	2	0|0|0|4|3|0|2|0|0|0|3	0	-14.37	0.3	0.56
CG18747	CG3661	FBgn0010078	RpL23	8|7	15	7.5	2	38|4|28|52|56|53|46|34|17|9|32	0	-210.27	0.14	0.7
CG18747	CG1782	FBgn0023143	Uba1	3|2	5	2.5	2	2|3|12|34|20|0|24|0|0|0|12	0	-106.45	0.1	0.7
CG18747	CG11844	FBgn0046214	vig2	11|4	15	7.5	2	0|1|4|13|16|0|19|0|4|4|8	0	-57.02	0.47	0.68
CG18747	CG4211	FBgn0004227	nonA	2|0	2	1	2	0|0|0|24|14|0|7|0|0|4|8	0	-66.99	0.07	0.7
CG18747	CG6543	FBgn0033879	CG6543	2|0	2	1	2	3|2|2|9|6|0|8|0|2|0|3	0	-33.45	0.13	0.7
CG18747	CG9277	FBgn0284243	betaTub56D	61|46	107	53.5	2	43|7|70|250|198|71|166|69|35|39|25	0	#NAME?	0.26	0.7
CG18747	CG9273	FBgn0032906	RPA2	3|0	3	1.5	2	53|5|44|2|2|0|5|0|0|0|5	0	-149.82	0.04	0.7
CG18747	CG46149	FBgn0267828	Fatp	0|3	3	1.5	2	0|0|0|0|0|0|0|0|12|7|0	0	-26.81	0.24	0.63
CG18747	CG7961	FBgn0025725	alphaCOP	23|20	43	21.5	2	12|1|24|212|167|17|90|6|9|19|74	0	-612.6	0.14	0.7
CG18747	CG8057	FBgn0260972	alc	1|2	3	1.5	2	0|0|0|6|8|2|4|0|5|5|0	0	-24.29	0.24	0.7
CG18747	CG7967	FBgn0035251	Vta1	2|0	2	1	2	3|0|3|0|0|0|2|0|0|0|0	0	-11.52	0.38	0.52
CG18747	CG8055	FBgn0086656	shrb	26|19	45	22.5	2	58|7|32|2|2|0|35|0|2|3|6	0	-126.54	0.54	0.69
CG18747	CG4822	FBgn0031220	CG4822	6|4	10	5	2	0|0|0|0|0|0|0|0|0|0|0	1	6.79	50	0
CG18747	CG3836	FBgn0003459	stwl	8|3	11	5.5	2	97|11|122|2|3|0|60|0|0|0|5	0	-399.1	0.06	0.7
CG18747	CG15792	FBgn0265434	zip	127|83	210	105	2	138|18|165|76|86|16|147|47|5|3|84	0	-425.91	0.7	0.69
CG18747	CG6842	FBgn0283469	Vps4	16|7	23	11.5	2	11|1|11|5|4|4|5|2|2|3|5	0	-22.52	1.28	0.56
CG18747	CG14307	FBgn0004652	fru	3|0	3	1.5	2	7|0|4|8|6|0|3|0|0|0|3	0	-30.47	0.21	0.64
CG18747	CG8715	FBgn0020279	lig	7|4	11	5.5	2	2|0|11|11|13|1|13|1|0|0|6	0	-41.7	0.45	0.67
CG18747	CG3333	FBgn0259937	Nop60B	5|0	5	2.5	2	6|0|3|3|5|0|9|0|3|2|2	0	-29.03	0.38	0.62
CG18747	CG8280	FBgn0284245	eEF1alpha1	33|27	60	30	2	43|3|44|85|87|53|63|34|23|23|48	0	-258.68	0.38	0.7
CG18747	CG2207	FBgn0022893	Df31	0|2	2	1	2	3|1|23|50|41|0|66|10|4|0|39	0	-233.03	0.02	0.7
CG18747	CG17593	FBgn0031544	CG17593	2|2	4	2	2	1|0|2|2|3|0|1|0|2|2|1	0	-6.23	0.86	0.48
CG18747	CG4918	FBgn0003274	RpLP2	0|3	3	1.5	2	4|0|4|5|6|2|5|3|0|0|5	0	-23.13	0.28	0.7
CG18747	CG4916	FBgn0004419	me31B	3|2	5	2.5	2	0|0|0|11|9|0|6|0|2|6|0	0	-31.45	0.29	0.7
CG18747	CG4917	FBgn0039003	wfs1	1|1	2	1	2	0|0|0|0|0|0|1|0|0|0|1	0	-1.77	1.5	0.7
CG18747	CG4912	FBgn0032198	eEF1delta	1|1	2	1	2	3|0|2|12|10|0|15|0|0|0|6	0	-50.29	0.08	0.7
CG18747	CG3231	FBgn0086129	snama	12|6	18	9	2	4|1|4|4|2|1|14|1|0|0|3	0	-17.45	1.23	0.55
CG18747	CG11856	FBgn0039302	Nup358	2|2	4	2	2	4|0|11|25|13|0|22|0|0|2|8	0	-80.12	0.1	0.7
CG18747	CG9684	FBgn0037583	CG9684	3|0	3	1.5	2	8|1|9|0|0|0|2|0|0|0|2	0	-27.26	0.24	0.63
CG18747	CG31852	FBgn0051852	Tap42	2|3	5	2.5	2	0|0|4|0|0|0|0|0|0|0|0	0.22	-2	1.88	0.33
CG18747	CG10423	FBgn0039300	RpS27	5|3	8	4	2	11|0|10|9|9|13|7|8|5|8|4	0	-40.03	0.35	0.7
CG18747	CG15435	FBgn0031608	CG15435	0|2	2	1	2	0|0|0|0|0|0|0|0|0|0|0	0.48	-1.34	10	0.17
CG18747	CG5726	FBgn0034313	CG5726	7|3	10	5	2	0|0|0|7|4|0|2|0|0|0|1	0	-11.81	1.15	0.49
CG18747	CG14411	FBgn0030582	CG14411	3|0	3	1.5	2	0|0|0|0|0|0|0|0|0|2|0	0.34	-3.51	2.25	0.29
CG18747	CG1242	FBgn0001233	Hsp83	15|18	33	16.5	2	15|8|52|81|70|11|79|12|12|9|41	0	-284.47	0.22	0.7
CG18747	CG8759	FBgn0086904	Nacalpha	3|2	5	2.5	2	1|0|3|5|3|0|9|0|2|0|7	0	-24.46	0.36	0.64
CG18747	CG9543	FBgn0027496	epsilonCOP	3|2	5	2.5	2	5|1|2|29|26|4|13|0|3|2|12	0	-91.58	0.11	0.7
CG18747	CG10255	FBgn0033984	Lap1	2|0	2	1	2	0|0|0|0|0|0|0|0|0|0|0	0.48	-1.34	10	0.17
CG18747	CG8597	FBgn0011640	lark	2|1	3	1.5	2	0|0|3|51|46|0|27|0|1|3|7	0	-178.4	0.04	0.7
CG18747	CG9900	FBgn0004643	Zw10	4|0	4	2	2	0|0|0|0|0|0|0|0|0|0|0	0.5	-1.34	20	0.1
CG18747	CG9901	FBgn0011742	Arp2	15|8	23	11.5	2	9|2|12|3|1|0|4|0|5|4|6	0	-21	1.28	0.57
CG18747	CG7029	FBgn0039026	CG7029	8|3	11	5.5	2	0|0|0|0|0|0|0|0|0|0|0	1	5.04	55	0
CG18747	CG9750	FBgn0040075	rept	1|1	2	1	2	6|0|3|4|7|0|4|0|0|2|4	0	-21.47	0.18	0.7
CG18747	CG4145	FBgn0000299	Col4a1	3|2	5	2.5	2	0|0|0|0|0|0|0|0|2|0|0	0.56	-0.16	3.75	0.06
CG18747	CG4147	FBgn0001218	Hsc70-3	53|49	102	51	2	28|8|40|84|92|42|76|19|25|26|44	0	-233.78	0.61	0.69
CG18747	CG7438	FBgn0086347	Myo31DF	13|7	20	10	2	13|0|24|2|5|0|16|3|0|0|3	0	-56.38	0.57	0.68
CG18747	CG7439	FBgn0087035	AGO2	7|4	11	5.5	2	5|0|5|8|4|2|10|3|0|0|2	0	-22.83	0.72	0.63
CG18747	CG3756	FBgn0031657	CG3756	8|6	14	7	2	4|0|0|24|18|4|10|4|3|2|10	0	-57.12	0.4	0.68
CG18747	CG3751	FBgn0261596	RpS24	4|4	8	4	2	0|0|0|4|4|5|3|2|2|1|0	0	-10.37	0.92	0.56
CG18747	CG3752	FBgn0012036	Aldh	7|3	10	5	2	11|0|6|18|9|0|14|5|1|2|6	0	-52.71	0.35	0.68
CG18747	CG7430	FBgn0036762	CG7430	2|0	2	1	2	5|1|9|8|2|0|8|0|0|0|0	0	-36.4	0.12	0.7
CG18747	CG3051	FBgn0023169	AMPKalpha	2|0	2	1	2	3|0|0|6|11|1|1|2|3|2|3	0	-28.73	0.15	0.7
CG18747	CG3056	FBgn0024987	ssx	2|0	2	1	2	0|0|0|9|9|0|4|0|0|0|3	0	-32.01	0.14	0.7
CG18747	CG7610	FBgn0020235	ATPsyngamma	9|7	16	8	2	12|1|15|9|8|15|8|12|10|12|6	0	-41.79	0.57	0.7
CG18747	CG7619	FBgn0015283	Rpn10	2|1	3	1.5	2	1|0|2|1|1|2|3|0|0|0|3	0	-9.13	0.56	0.52
CG18747	CG5081	FBgn0267849	Syx7	2|1	3	1.5	2	0|0|0|0|0|0|0|0|0|0|2	0.23	-1.46	2.25	0.31
CG18747	CG9124	FBgn0022023	eIF3h	3|0	3	1.5	2	2|0|2|7|5|0|4|0|0|0|4	0	-23.13	0.28	0.61
CG18747	CG18572	FBgn0003189	r	10|7	17	8.5	2	0|2|3|27|24|9|9|3|0|6|9	0	-65.47	0.42	0.68
CG18747	CG10470	FBgn0032746	CG10470	2|1	3	1.5	2	0|0|0|0|0|0|0|0|0|0|0	0.48	1.17	15	0.17
CG18747	CG1973	FBgn0260990	yata	2|4	6	3	2	0|0|0|15|8|1|4|2|0|0|2	0	-32.32	0.33	0.66
CG18747	CG1972	FBgn0039691	IntS11	5|2	7	3.5	2	0|0|0|5|4|3|0|0|0|3|0	0	-12.34	0.88	0.52
CG18747	CG1977	FBgn0250789	alpha-Spec	331|208	539	269.5	2	142|17|143|35|25|12|107|22|100|30|47	0	-172.41	2.06	0.68
CG18747	CG4003	FBgn0040078	pont	5|0	5	2.5	2	14|3|7|11|12|2|15|2|0|0|8	0	-60.16	0.18	0.7
CG18747	CG6699	FBgn0025724	beta'COP	12|13	25	12.5	2	7|2|15|196|186|8|73|5|12|14|67	0	-621.2	0.08	0.7
CG18747	CG6756	FBgn0032397	Tom70	2|4	6	3	2	5|2|2|3|3|2|0|0|1|2|3	0	-11.12	0.82	0.53
CG18747	CG5436	FBgn0001230	Hsp68	20|10	30	15	2	11|0|11|11|13|0|13|0|9|0|13	0	-32.43	1.15	0.63
CG18747	CG6692	FBgn0013770	Cp1	2|2	4	2	2	6|0|8|9|7|6|6|6|3|3|3	0	-28.63	0.25	0.7
CG18747	CG11984	FBgn0037655	Kcmf1	2|3	5	2.5	2	6|0|6|23|13|10|8|3|2|2|3	0	-59.58	0.16	0.7
CG18747	CG5920	FBgn0004867	RpS2	8|5	13	6.5	2	9|1|8|15|9|6|10|3|5|6|8	0	-35.34	0.57	0.66
CG18747	CG9745	FBgn0000412	D1	2|1	3	1.5	2	35|1|39|0|0|0|55|0|0|0|8	0	-186.03	0.03	0.7
CG18747	CG6051	FBgn0039492	CG6051	3|4	7	3.5	2	0|0|0|0|0|0|0|0|0|0|0	1	5.04	35	0
CG18747	CG6050	FBgn0024556	mEFTu1	2|2	4	2	2	2|1|0|6|6|0|5|0|0|0|2	0	-19.02	0.35	0.7
CG18747	CG7111	FBgn0020618	Rack1	1|1	2	1	2	0|0|9|7|6|4|7|2|1|4|8	0	-31.42	0.12	0.7
CG18747	CG44154	FBgn0265003	koi	12|3	15	7.5	2	5|0|4|11|22|1|4|3|3|4|0	0	-44.91	0.59	0.66
CG18747	CG8332	FBgn0034138	RpS15	12|8	20	10	2	5|1|2|16|12|16|13|3|9|4|5	0	-43.72	0.67	0.67
CG18747	CG14648	FBgn0263594	lost	4|1	5	2.5	2	3|1|13|23|12|3|17|2|0|0|14	0	-75.24	0.14	0.7
CG18747	CG17723	FBgn0035432	ZnT63C	3|0	3	1.5	2	0|0|0|0|0|0|0|0|3|0|0	0.25	-3.93	1.5	0.3
CG18747	CG30388	FBgn0034590	Magi	1|1	2	1	2	0|0|0|5|3|0|4|0|0|0|2	0	-14.45	0.25	0.7
CG18747	CG16865	FBgn0028919	CG16865	1|1	2	1	2	0|0|0|0|0|3|4|0|1|1|0	0	-9.13	0.38	0.7
CG18747	CG32138	FBgn0267795	Frl	10|10	20	10	2	5|2|8|37|30|5|5|5|8|8|6	0	-78.64	0.4	0.7
CG18747	CG8231	FBgn0027329	CCT6	12|8	20	10	2	7|0|10|10|11|6|12|3|5|7|12	0	-30.85	0.86	0.65
CG18747	CG8230	FBgn0027607	CG8230	2|0	2	1	2	1|0|2|3|3|3|0|0|0|0|0	0	-12.88	0.33	0.54
CG18747	CG30382	FBgn0050382	CG30382	1|1	2	1	2	2|0|2|9|9|5|8|3|3|3|6	0	-34.33	0.12	0.7
CG18747	CG10632	FBgn0036302	sowah	2|1	3	1.5	2	0|0|0|2|7|0|2|0|0|0|0	0	-12.9	0.41	0.57
CG18747	CG10630	FBgn0035608	blanks	10|6	16	8	2	0|3|10|15|14|0|15|3|0|2|8	0	-46.62	0.55	0.67
CG18747	CG4254	FBgn0011726	tsr	5|4	9	4.5	2	4|2|7|16|11|1|30|3|5|0|15	0	-74.94	0.22	0.7
CG18747	CG4257	FBgn0016917	Stat92E	3|0	3	1.5	2	0|0|0|2|1|0|2|0|0|0|0	0.04	-7.29	0.9	0.39
CG18747	CG31332	FBgn0260463	Unc-115b	0|7	7	3.5	2	3|0|9|0|0|3|7|3|1|1|6	0	-31.97	0.48	0.62
CG18747	CG10732	FBgn0036365	cmb	3|3	6	3	2	0|0|0|7|3|0|2|0|0|0|0	0	-10.45	0.75	0.56
CG18747	CG4538	FBgn0038745	CG4538	5|2	7	3.5	2	0|0|0|4|2|3|3|0|2|2|0	0	-9.84	1.05	0.47
CG18747	CG2970	FBgn0034936	CG2970	2|1	3	1.5	2	0|0|0|2|3|0|2|0|0|0|0	0	-7.81	0.64	0.49
CG18747	CG14977	FBgn0035469	CG14977	1|1	2	1	2	0|0|0|0|0|0|0|0|0|0|0	0	1.17	10	0.7
CG18747	CG4097	FBgn0002284	Prosbeta6	6|3	9	4.5	2	3|0|1|4|2|0|6|0|2|4|0	0	-13.14	0.96	0.54
CG18747	CG6948	FBgn0024814	Clc	1|2	3	1.5	2	2|0|5|3|3|0|5|0|0|0|0	0	-15.87	0.35	0.6
CG18747	CG18408	FBgn0033504	CAP	3|0	3	1.5	2	0|0|0|0|0|0|0|0|0|0|0	0.5	-1.34	15	0.12
CG18747	CG1907	FBgn0039674	CG1907	2|2	4	2	2	0|0|0|2|2|0|0|0|7|3|0	0	-12.17	0.5	0.58
CG18747	CG6944	FBgn0002525	Lam	4|2	6	3	2	24|4|36|6|6|0|19|2|0|0|3	0	-107.74	0.11	0.7
CG18747	CG6370	FBgn0034277	OstDelta	5|4	9	4.5	2	1|0|5|13|12|5|13|2|4|8|6	0	-43.08	0.36	0.7
CG18747	CG18076	FBgn0013733	shot	2|0	2	1	2	0|0|3|0|2|0|0|0|0|0|0	0.01	-7.26	0.6	0.43
CG18747	CG4869	FBgn0003890	betaTub97EF	23|0	23	11.5	2	13|3|27|45|37|0|35|0|0|0|1	0	-173.62	0.29	0.69
CG18747	CG42250	FBgn0261279	lqfR	0|2	2	1	2	0|0|0|3|3|0|0|0|0|0|0	0	-8.47	0.5	0.46
CG18747	CG4849	FBgn0039566	CG4849	3|4	7	3.5	2	4|0|6|6|3|6|6|2|0|0|3	0	-18.23	0.58	0.62
CG18747	CG6378	FBgn0026562	SPARC	2|2	4	2	2	0|0|0|3|2|0|0|0|2|0|0	0	-6.23	0.86	0.48
CG18747	CG32434	FBgn0026179	siz	3|3	6	3	2	0|0|0|7|10|0|0|0|0|0|3	0	-20.72	0.45	0.64
CG18747	CG9539	FBgn0086357	Sec61alpha	2|0	2	1	2	0|0|0|0|0|2|0|1|3|2|0	0	-10.06	0.43	0.49
CG18747	CG42328	FBgn0259228	C3G	6|0	6	3	2	0|0|0|0|0|0|0|0|0|0|0	0.5	-1.34	30	0.09
CG18747	CG7806	FBgn0032018	CG7806	0|2	2	1	2	0|0|0|0|0|0|0|0|0|0|0	0.48	-1.34	10	0.17
CG18747	CG7809	FBgn0036919	Grasp65	1|1	2	1	2	0|0|0|0|0|0|0|0|0|0|2	0	-1.46	1.5	0.7
CG18747	CG7808	FBgn0039713	RpS8	7|5	12	6	2	6|1|10|13|12|7|10|5|5|6|8	0	-36.68	0.51	0.7
CG18747	CG17158	FBgn0011570	cpb	15|8	23	11.5	2	9|0|12|3|2|3|5|3|2|1|5	0	-19.78	1.33	0.57
CG18747	CG15811	FBgn0004574	Rop	2|0	2	1	2	2|0|2|0|0|0|0|0|0|0|0	0.03	-5.93	0.75	0.4
CG18747	CG10978	FBgn0037374	jagn	0|2	2	1	2	0|0|0|0|0|0|0|0|0|0|0	0.48	-1.34	10	0.17
CG18747	CG14184	FBgn0036932	CG14184	1|2	3	1.5	2	0|0|0|0|0|0|0|0|0|0|0	0.48	1.17	15	0.17
CG18747	CG17654	FBgn0000579	Eno	4|4	8	4	2	3|0|6|23|18|8|20|4|13|5|7	0	-75.45	0.2	0.7
CG18747	CG32594	FBgn0052594	be	1|2	3	1.5	2	0|0|0|0|0|0|0|0|0|0|0	0.48	1.17	15	0.17
CG18747	CG31523	FBgn0051523	CG31523	1|2	3	1.5	2	2|1|1|0|0|1|0|2|1|1|0	0.01	-5.37	0.9	0.43
CG18747	CG4898	FBgn0003721	Tm1	6|5	11	5.5	2	15|0|5|4|0|0|17|0|0|0|19	0	-58.61	0.32	0.68
CG18747	CG4954	FBgn0034258	eIF3c	4|4	8	4	2	0|1|4|8|10|2|10|2|3|4|5	0	-29.45	0.43	0.7
CG18747	CG1371	FBgn0033482	CG1371	0|3	3	1.5	2	5|0|5|9|10|5|8|5|3|7|3	0	-39.35	0.17	0.7
CG18747	CG4897	FBgn0005593	RpL7	2|1	3	1.5	2	3|1|4|13|10|2|12|0|0|0|8	0	-47.38	0.13	0.7
CG18747	CG3178	FBgn0004584	Rrp1	2|0	2	1	2	6|2|8|0|0|0|97|0|0|0|0	0	-162.61	0.03	0.7
CG18747	CG6475	FBgn0038886	CG6475	2|0	2	1	2	0|0|0|0|0|0|0|0|0|0|0	0.48	-1.34	10	0.17
CG18747	CG6946	FBgn0259139	glo	4|0	4	2	2	0|0|0|9|5|0|5|0|0|0|4	0	-27.54	0.32	0.62
CG18747	CG1616	FBgn0015929	dpa	3|2	5	2.5	2	0|0|0|7|7|0|14|0|0|3|3	0	-34.09	0.27	0.7
CG18747	CG33106	FBgn0043884	mask	8|7	15	7.5	2	0|2|3|25|18|0|17|0|0|0|4	0	-66.13	0.38	0.68
CG18747	CG2998	FBgn0030136	RpS28b	2|1	3	1.5	2	3|0|1|2|2|2|4|2|3|2|3	0	-11.77	0.45	0.7
CG18747	CG4877	FBgn0036624	RAF2	2|0	2	1	2	0|0|0|70|59|0|17|0|0|0|12	0	-215.74	0.02	0.7
CG18747	CG33105	FBgn0053105	p24-2	1|1	2	1	2	0|0|0|0|0|0|1|0|0|0|1	0	-1.77	1.5	0.7
CG18747	CG7382	FBgn0031708	CG7382	2|0	2	1	2	0|0|0|0|0|0|0|0|0|0|0	0.48	-1.34	10	0.17
CG18747	CG4769	FBgn0035600	Cyt-c1	3|2	5	2.5	2	3|0|2|10|6|2|8|1|2|2|5	0	-28.63	0.31	0.7
CG18747	CG7380	FBgn0031977	baf	1|1	2	1	2	62|3|27|1|1|1|5|4|1|1|3	0	-132.86	0.03	0.7
CG18747	CG15693	FBgn0019936	RpS20	2|2	4	2	2	10|1|7|10|9|6|8|2|4|2|3	0	-35.68	0.21	0.7
CG18747	CG4620	FBgn0004395	unk	3|0	3	1.5	2	0|0|0|11|12|0|2|0|0|0|2	0	-35.88	0.18	0.66
CG18747	CG15697	FBgn0038834	RpS30	2|1	3	1.5	2	4|0|3|3|3|2|4|1|1|1|2	0	-13.14	0.41	0.7
CG18747	CG8415	FBgn0033912	RpS23	5|4	9	4.5	2	6|0|5|10|8|6|11|3|7|1|4	0	-30.79	0.47	0.7
CG18747	CG8790	FBgn0027610	Dic1	1|1	2	1	2	0|0|0|0|3|2|2|0|2|2|0	0	-7.81	0.43	0.7
CG18747	CG4180	FBgn0001977	CIAPIN1	0|3	3	1.5	2	0|0|0|0|0|0|2|0|0|0|0	0.34	-3.51	2.25	0.29
CG18747	CG4183	FBgn0001225	Hsp26	3|3	6	3	2	1|0|3|0|0|0|2|0|0|0|2	0.01	-4.76	1.29	0.44
CG18747	CG7903	FBgn0039730	CG7903	2|0	2	1	2	0|0|0|1|2|0|6|0|0|0|0	0	-12.56	0.33	0.53
CG18747	CG7478	FBgn0000045	Act79B	110|0	110	55	2	0|23|0|0|0|0|0|0|0|6|0	0.5	-41.16	5.69	0.12
CG18747	CG4747	FBgn0043456	CG4747	2|3	5	2.5	2	5|0|2|6|5|0|32|0|4|4|2	0	-54.41	0.17	0.7
CG18747	CG9946	FBgn0261609	eIF2alpha	10|7	17	8.5	2	6|0|9|8|8|6|12|2|0|0|8	0	-25.06	0.88	0.64
CG18747	CG9947	FBgn0030752	CG9947	2|0	2	1	2	0|0|0|0|0|0|0|0|0|0|0	0.48	-1.34	10	0.17
CG18747	CG3651	FBgn0032974	CG3651	0|2	2	1	2	0|0|0|0|0|0|0|0|0|0|0	0.48	-1.34	10	0.17
CG18747	CG3653	FBgn0028369	kirre	0|2	2	1	2	0|0|0|2|0|0|2|0|0|0|0	0.03	-5.93	0.75	0.4
CG18747	CG40451	FBgn0263977	Tim17b	3|1	4	2	2	0|0|0|0|0|0|0|0|0|0|0	0.5	1.17	20	0.12
CG18747	CG7359	FBgn0260855	Sec22	1|1	2	1	2	0|0|0|0|0|0|1|0|2|0|3	0	-6.47	0.5	0.7
CG18747	CG3870	FBgn0015372	RabX1	2|0	2	1	2	0|0|0|0|0|0|0|0|0|0|0	0.48	-1.34	10	0.17
CG18747	CG15218	FBgn0025674	CycK	3|3	6	3	2	2|0|3|0|0|4|0|1|3|2|0	0	-8.3	0.9	0.52
CG18747	CG7490	FBgn0000100	RpLP0	5|4	9	4.5	2	14|1|13|18|13|5|19|4|6|2|12	0	-61.25	0.26	0.7
CG18747	CG7558	FBgn0262716	Arp3	16|14	30	15	2	7|1|10|9|9|1|6|2|4|3|3	0	-13.63	1.61	0.57
CG18747	CG17272	FBgn0038830	CG17272	2|0	2	1	2	0|0|0|0|0|0|0|0|0|0|0	0.48	-1.34	10	0.17
CG18747	CG5474	FBgn0011016	SsRbeta	4|2	6	3	2	3|0|2|3|2|3|3|0|4|3|2	0	-9.84	0.9	0.51
CG18747	CG15220	FBgn0266421	RPA3	3|3	6	3	2	46|3|26|1|1|0|8|0|0|0|3	0	-104.87	0.11	0.7
CG18747	CG10360	FBgn0003231	ref(2)P	7|7	14	7	2	3|0|6|0|0|0|2|0|0|0|3	0.01	-4.95	1.75	0.44
CG18747	CG10363	FBgn0041180	Tep4	4|7	11	5.5	2	0|0|3|15|10|0|26|0|0|0|7	0	-60.67	0.32	0.68
CG18747	CG9484	FBgn0002431	hyd	33|23	56	28	2	5|1|9|54|44|7|17|1|0|13|17	0	-104.77	0.73	0.69
CG18747	CG2028	FBgn0015024	CkIalpha	5|2	7	3.5	2	4|0|0|8|7|3|3|0|2|2|1	0	-21.73	0.55	0.61
CG18747	CG1524	FBgn0004403	RpS14a	9|7	16	8	2	9|0|7|13|13|13|10|9|10|8|7	0	-37.84	0.62	0.7
CG18747	CG15707	FBgn0034098	krimp	6|3	9	4.5	2	4|0|2|0|0|0|1|0|0|0|2	0.07	-5.94	1.69	0.37
CG18747	CG10206	FBgn0026196	nop5	6|4	10	5	2	5|0|3|4|5|0|14|0|2|0|3	0	-23.61	0.62	0.64
CG18747	CG6155	FBgn0014877	Roe1	5|0	5	2.5	2	5|0|1|7|9|6|6|0|4|2|2	0	-31.97	0.34	0.63
CG18747	CG1821	FBgn0285949	RpL31	2|2	4	2	2	3|0|0|6|4|4|9|3|3|3|6	0	-24.46	0.29	0.7
CG18747	CG16858	FBgn0016075	vkg	4|1	5	2.5	2	0|0|0|0|0|0|0|0|0|0|0	0.5	1.17	25	0.1
CG18747	CG8996	FBgn0010516	wal	4|3	7	3.5	2	2|2|4|9|10|5|11|3|3|3|6	0	-34.45	0.35	0.7
CG18747	CG5394	FBgn0005674	GluProRS	0|2	2	1	2	0|0|7|12|8|0|13|0|0|0|6	0	-48.25	0.09	0.7
CG18747	CG43427	FBgn0263346	CG43427	2|1	3	1.5	2	0|0|0|0|0|0|0|0|0|0|0	0.48	1.17	15	0.17
CG18747	CG6905	FBgn0265574	Cdc5	1|2	3	1.5	2	2|0|2|6|1|0|2|0|0|0|0	0	-11.65	0.45	0.56
CG18747	CG4038	FBgn0011824	CG4038	5|3	8	4	2	4|0|2|0|0|0|26|2|3|0|2	0	-37.36	0.36	0.67
CG18747	CG5336	FBgn0032409	Ced-12	5|4	9	4.5	2	2|0|2|2|2|0|0|0|0|0|0	0.19	-2.21	2.25	0.33
CG18747	CG5330	FBgn0015268	Nap1	6|5	11	5.5	2	7|0|7|15|7|4|10|2|0|0|4	0	-32.58	0.52	0.66
CG18747	CG12101	FBgn0015245	Hsp60A	9|9	18	9	2	6|2|10|29|22|2|40|2|3|1|17	0	-103.76	0.3	0.7
CG18747	CG16983	FBgn0025637	SkpA	2|1	3	1.5	2	0|0|0|1|3|0|1|0|0|0|1	0.01	-5.37	0.9	0.43
CG18747	CG8978	FBgn0001961	Arpc1	11|8	19	9.5	2	3|2|6|2|2|3|3|2|0|0|0	0.29	-3.6	2.38	0.3
CG18747	CG1539	FBgn0082582	tmod	8|6	14	7	2	5|0|7|1|3|0|6|0|0|0|2	0	-13.34	1.17	0.57
CG18747	CG10522	FBgn0002466	sti	7|2	9	4.5	2	2|1|7|0|0|0|0|0|0|0|0	0.03	-9.42	1.35	0.4
CG18747	CG32939	FBgn0052939	CG32939	1|1	2	1	2	0|0|0|0|0|0|0|0|0|0|0	0	1.17	10	0.7
CG18747	CG13388	FBgn0027932	Akap200	6|2	8	4	2	5|2|14|30|27|2|18|4|0|2|22	0	-108.16	0.15	0.7
CG18747	CG13389	FBgn0010265	RpS13	3|2	5	2.5	2	12|0|7|17|16|13|17|8|6|2|8	0	-65.81	0.15	0.7
CG18747	CG5502	FBgn0003279	RpL4	7|6	13	6.5	2	8|0|10|24|26|3|34|0|0|0|16	0	-102.42	0.23	0.7
CG18747	CG33926	FBgn0053926	CG33926	3|3	6	3	2	0|0|0|0|0|0|0|0|0|0|0	0.99	5.04	30	0
CG18747	CG1822	FBgn0014133	bif	33|21	54	27	2	8|0|16|9|8|0|13|0|0|0|7	0.27	-15.44	2.13	0.3
CG18747	CG7654	FBgn0036928	Tom20	4|0	4	2	2	0|0|0|5|2|0|3|0|2|0|2	0	-14.37	0.6	0.51
CG18747	CG42748	FBgn0261802	CG42748	8|1	9	4.5	2	11|0|8|21|26|7|16|7|5|7|10	0	-88.5	0.21	0.7
CG18747	CG9748	FBgn0263231	bel	13|10	23	11.5	2	4|1|6|39|27|3|18|0|3|8|11	0	-91.37	0.41	0.69
CG18747	CG13849	FBgn0038964	Nop56	2|2	4	2	2	11|1|7|11|8|0|6|9|4|2|4	0	-38.5	0.19	0.7
CG18747	CG5870	FBgn0250788	beta-Spec	107|67	174	87	2	49|5|60|3|0|0|36|0|3|4|12	0	-75.61	1.8	0.67
CG18747	CG8200	FBgn0024754	Flo1	14|22	36	18	2	22|1|16|4|0|7|3|4|26|33|2	0	-79.08	0.67	0.68
CG18747	CG8201	FBgn0260934	par-1	8|0	8	4	2	6|0|5|43|58|18|14|8|6|2|22	0	-181.66	0.1	0.7
CG18747	CG6521	FBgn0027363	Stam	3|1	4	2	2	2|0|3|3|3|0|7|0|0|0|4	0	-17.27	0.43	0.6
CG18747	CG4799	FBgn0267727	Pen	4|4	8	4	2	6|0|3|14|10|3|4|2|0|0|6	0	-31.99	0.4	0.7
CG18747	CG6523	FBgn0032509	CG6523	2|3	5	2.5	2	0|0|0|2|2|0|5|0|0|0|3	0	-9.84	0.75	0.53
CG18747	CG1796	FBgn0030365	Tango4	2|2	4	2	2	1|0|2|0|0|0|6|0|0|2|0	0	-9.72	0.6	0.55
CG18747	CG10701	FBgn0011661	Moe	0|2	2	1	2	0|0|3|13|8|0|17|0|0|0|5	0	-55.57	0.08	0.7
CG18747	CG32850	FBgn0052850	CG32850	2|0	2	1	2	0|0|0|0|0|0|0|0|0|0|0	0.48	-1.34	10	0.17
CG18747	CG31363	FBgn0051363	Jupiter	4|0	4	2	2	0|0|8|7|7|0|19|2|0|0|10	0	-53.81	0.16	0.7
CG18747	CG2843	FBgn0031452	Cwc25	4|2	6	3	2	0|0|0|0|0|0|0|0|0|0|0	0.98	3.2	30	0
CG18747	CG32491	FBgn0002781	mod(mdg4)	5|0	5	2.5	2	42|0|57|0|2|0|2|0|0|0|0	0	-148.24	0.07	0.7
CG18747	CG10067	FBgn0000044	Act57B	30|17	47	23.5	2	30|0|45|15|13|10|19|0|0|3|11	0	-89.38	0.75	0.69
CG18747	CG9188	FBgn0031878	sip2	5|2	7	3.5	2	0|0|0|6|5|0|0|0|0|2|0	0	-13.68	0.81	0.55
CG18747	CG5028	FBgn0039358	CG5028	1|1	2	1	2	2|0|2|1|2|0|3|3|5|3|2	0	-13.14	0.27	0.7
CG18747	CG5382	FBgn0038950	CG5382	2|2	4	2	2	0|0|0|0|0|0|2|0|0|0|0	0.46	-0.16	3	0.27
CG18747	CG5020	FBgn0020503	CLIP-190	15|5	20	10	2	2|0|8|0|0|0|2|0|0|0|3	0.4	-8.57	2.31	0.28
CG18747	CG5520	FBgn0039562	Gp93	8|8	16	8	2	6|4|19|40|26|4|33|5|3|6|21	0	-117.97	0.24	0.7
CG18747	CG1891	FBgn0003317	sax	2|0	2	1	2	0|0|0|0|0|0|0|0|0|0|0	0.48	-1.34	10	0.17
CG18747	CG5591	FBgn0263667	Lpt	2|0	2	1	2	0|0|0|0|0|0|0|0|0|0|0	0.48	-1.34	10	0.17
CG18747	CG1548	FBgn0029093	cathD	7|6	13	6.5	2	4|1|9|6|10|6|7|2|6|5|5	0	-23.01	0.75	0.64
CG18747	CG5599	FBgn0030612	CG5599	12|6	18	9	2	29|1|36|2|1|0|7|0|2|2|4	0	-84.4	0.38	0.69
CG18747	CG1416	FBgn0032961	CG1416	0|2	2	1	2	0|0|3|3|4|0|6|0|0|0|6	0	-23.13	0.19	0.7
CG18747	CG7971	FBgn0035253	CG7971	5|4	9	4.5	2	1|0|2|0|0|0|12|0|0|0|2	0	-13.18	0.84	0.58
CG18747	CG42314	FBgn0259214	PMCA	1|1	2	1	2	0|0|0|0|0|0|0|0|0|0|2	0	-1.46	1.5	0.7
CG18747	CG1363	FBgn0004133	blow	2|0	2	1	2	0|0|0|0|0|0|0|0|0|0|0	0.48	-1.34	10	0.17
CG18747	CG7977	FBgn0026372	RpL23A	2|2	4	2	2	10|1|13|8|8|3|36|1|2|0|8	0	-77.87	0.1	0.7
CG18747	CG3299	FBgn0004397	Vinc	5|4	9	4.5	2	4|1|10|13|10|0|19|0|0|0|16	0	-57.02	0.28	0.7
CG18747	CG4832	FBgn0013765	cnn	3|0	3	1.5	2	0|1|3|0|0|0|0|0|0|0|0	0.12	-5.74	1.12	0.36
CG18747	CG2216	FBgn0015222	Fer1HCH	1|1	2	1	2	0|0|0|1|1|0|0|0|0|0|0	0	-1.77	1.5	0.7
CG18747	CG14637	FBgn0015331	abs	15|11	26	13	2	13|5|13|0|3|0|5|3|4|3|2	0	-21.1	1.26	0.61
CG18747	CG9983	FBgn0001215	Hrb98DE	2|0	2	1	2	0|0|0|4|5|0|8|0|0|0|2	0	-24.61	0.18	0.63
CG18747	CG3342	FBgn0029874	CG3342	11|3	14	7	2	4|1|7|0|0|0|0|0|0|0|0	0.16	-10.33	1.75	0.34
CG18747	CG3612	FBgn0011211	blw	12|16	28	14	2	18|6|17|37|29|26|36|17|14|20|22	0	-111.93	0.41	0.7
CG18747	CG3613	FBgn0022986	qkr58E-1	3|0	3	1.5	2	0|0|0|10|13|0|9|0|0|0|2	0	-46.78	0.14	0.7
CG18747	CG16757	FBgn0010905	Spn	40|18	58	29	2	9|4|13|0|0|0|2|0|4|2|0	0.5	-7.01	3.35	0.08
CG18747	CG5650	FBgn0004103	Pp1-87B	3|1	4	2	2	0|0|0|3|1|0|0|0|0|0|0	0.12	-4.04	1.5	0.36
CG18747	CG8295	FBgn0034051	Mlf	1|2	3	1.5	2	0|0|0|0|0|0|0|0|0|2|0	0.23	-1.46	2.25	0.31
CG18747	CG16753	FBgn0035393	CG16753	2|0	2	1	2	4|1|0|0|0|0|3|0|0|0|2	0	-12.88	0.33	0.54
CG18747	CG5654	FBgn0022959	yps	5|3	8	4	2	2|0|7|18|22|0|34|0|3|2|7	0	-96.92	0.16	0.7
CG18747	CG32593	FBgn0264078	Flo2	15|27	42	21	2	21|1|13|0|0|9|2|6|24|34|5	0	-74.25	0.8	0.68
CG18747	CG1099	FBgn0023388	Dap160	7|4	11	5.5	2	0|0|0|0|0|0|0|0|0|0|0	1	6.79	55	0
CG18747	CG3186	FBgn0285952	eEF5	3|0	3	1.5	2	0|0|0|1|4|0|7|0|0|0|4	0	-21.63	0.3	0.6
CG18747	CG33978	FBgn0053978	CG33978	0|2	2	1	2	0|0|0|0|0|0|0|0|0|0|0	0.48	-1.34	10	0.17
CG18747	CG3595	FBgn0003514	sqh	15|6	21	10.5	2	14|2|8|4|1|2|8|2|0|0|7	0	-28.08	1.05	0.61
CG18747	CG3917	FBgn0026430	Grip84	3|0	3	1.5	2	0|0|0|0|0|0|0|0|0|0|0	0.5	-1.34	15	0.12
CG18747	CG18001	FBgn0040007	RpL38	5|4	9	4.5	2	8|0|3|8|8|8|8|7|4|3|6	0	-24.12	0.56	0.7
CG18747	CG11901	FBgn0029176	eEF1gamma	17|13	30	15	2	15|5|23|36|29|7|41|7|18|6|23	0	-115.12	0.42	0.7
CG18747	CG10849	FBgn0035471	Sc2	3|4	7	3.5	2	4|0|5|3|1|2|0|2|5|2|0	0	-13.14	0.75	0.58
CG18747	CG7109	FBgn0004177	mts	3|3	6	3	2	0|0|0|2|2|0|3|0|0|0|0	0.01	-4.76	1.29	0.44
CG18747	CG9372	FBgn0036891	CG9372	2|1	3	1.5	2	1|0|2|6|7|0|2|0|2|1|3	0	-20.05	0.28	0.7
CG18747	CG1092	FBgn0037228	CG1092	2|1	3	1.5	2	0|0|0|3|2|2|0|0|3|4|0	0	-11.77	0.45	0.56
CG18747	CG33130	FBgn0263197	Patronin	7|3	10	5	2	0|0|6|50|44|0|22|0|0|0|17	0	-158	0.13	0.7
CG18747	CG10241	FBgn0015714	Cyp6a17	2|0	2	1	2	0|0|0|0|0|0|0|0|0|0|0	0.48	-1.34	10	0.17
CG18747	CG7421	FBgn0037137	Nopp140	2|0	2	1	2	4|0|3|2|4|1|77|2|2|2|2	0	-123.83	0.04	0.7
CG18747	CG8582	FBgn0035772	Sh3beta	2|0	2	1	2	0|0|0|2|2|0|7|0|0|0|7	0	-23.02	0.19	0.62
CG18747	CG2064	FBgn0033205	CG2064	7|5	12	6	2	13|1|15|10|11|5|13|6|2|2|9	0	-44.82	0.44	0.7
CG18747	CG14812	FBgn0026090	CG14812	3|1	4	2	2	0|0|0|0|0|0|0|0|0|0|0	0.5	1.17	20	0.12
CG18747	CG7580	FBgn0036728	UQCR-Q	2|0	2	1	2	4|0|2|0|0|5|0|3|0|0|2	0	-17.24	0.25	0.59
CG18747	CG14816	FBgn0023517	Pgam5	2|0	2	1	2	4|0|2|5|0|0|0|0|0|0|0	0	-15.84	0.27	0.58
CG18747	CG2063	FBgn0033400	CG2063	2|0	2	1	2	0|0|0|0|0|2|3|0|0|2|2	0	-10.06	0.43	0.49
CG18747	CG3821	FBgn0002069	AspRS	4|0	4	2	2	2|2|4|6|7|0|8|0|0|0|5	0	-30.47	0.29	0.64
CG18747	CG31038	FBgn0051038	CG31038	0|3	3	1.5	2	0|0|0|0|0|0|0|0|0|0|0	0.5	-1.34	15	0.12
CG18747	CG7563	FBgn0012051	CalpA	3|0	3	1.5	2	0|0|0|0|0|0|3|0|0|0|0	0.25	-3.93	1.5	0.3
CG18747	CG5378	FBgn0028688	Rpn7	3|2	5	2.5	2	4|0|2|4|6|2|9|0|0|0|3	0	-21.73	0.39	0.63
CG18747	CG9423	FBgn0027338	Kap-alpha3	1|3	4	2	2	5|1|5|11|7|4|6|3|4|6|5	0	-31.42	0.25	0.7
CG18747	CG9035	FBgn0021795	Tapdelta	3|3	6	3	2	2|1|2|4|3|3|3|2|2|2|2	0	-8.3	0.9	0.52
CG18747	CG13345	FBgn0086356	tum	8|6	14	7	2	2|0|6|0|2|0|0|0|0|0|0	0.09	-4.01	2.1	0.36
CG18747	CG4013	FBgn0265523	Smr	2|0	2	1	2	0|0|0|34|19|0|18|0|0|0|8	0	-104.39	0.04	0.7
CG18747	CG5271	FBgn0003942	RpS27A	1|1	2	1	2	0|0|0|0|0|0|1|0|0|0|1	0	-1.77	1.5	0.7
CG18747	CG6773	FBgn0024509	Sec13	3|2	5	2.5	2	2|0|2|1|4|0|3|0|0|0|2	0	-8.55	0.83	0.51
CG18747	CG4016	FBgn0086532	Spt-I	2|3	5	2.5	2	0|0|0|2|1|0|0|0|3|2|0	0.01	-6.23	1.07	0.45
CG18747	CG13349	FBgn0033886	Rpn13	7|6	13	6.5	2	2|1|9|14|13|3|33|2|3|3|7	0	-67.78	0.33	0.7
CG18747	CG16932	FBgn0035060	Eps-15	16|5	21	10.5	2	0|0|0|0|0|0|0|0|0|0|0	1	8.47	105	0
CG18747	CG33957	FBgn0086690	Plp	5|5	10	5	2	3|0|11|0|0|0|0|0|0|0|0	0	-9.2	1.07	0.54
CG18747	CG5787	FBgn0032454	CG5787	7|4	11	5.5	2	3|1|1|7|7|0|54|0|0|0|2	0	-83.86	0.24	0.69
CG18747	CG8922	FBgn0002590	RpS5a	1|1	2	1	2	0|0|0|0|0|1|1|1|0|0|1	0	-2.97	1	0.7
CG18747	CG5931	FBgn0263599	l(3)72Ab	3|2	5	2.5	2	0|2|8|7|2|3|8|0|0|0|0	0	-27.26	0.33	0.65
CG18747	CG17246	FBgn0261439	SdhA	9|7	16	8	2	1|0|4|22|16|3|6|1|2|5|4	0	-43.84	0.55	0.67
CG18747	CG10236	FBgn0002526	LanA	7|8	15	7.5	2	0|0|5|12|7|0|11|0|0|0|6	0	-26.28	0.75	0.65
CG18747	CG9738	FBgn0024326	Mkk4	5|3	8	4	2	0|0|0|2|0|0|3|0|0|3|0	0.02	-5.94	1.5	0.41
CG18747	CG10230	FBgn0028691	Rpn9	5|4	9	4.5	2	3|1|3|3|9|2|3|2|0|0|4	0	-13.74	0.84	0.59
CG18747	CG42595	FBgn0262124	uex	6|3	9	4.5	2	0|0|0|0|0|0|2|0|0|0|0	0.81	0.71	6.75	0.02
CG18747	CG6066	FBgn0039488	CG6066	4|0	4	2	2	0|0|0|0|0|0|3|0|0|0|0	0.34	-3.93	2	0.29
CG18747	CG5183	FBgn0267330	KdelR	2|0	2	1	2	0|0|0|0|0|0|0|0|0|0|0	0.48	-1.34	10	0.17
CG18747	CG16788	FBgn0037707	RnpS1	2|1	3	1.5	2	0|0|0|0|2|0|5|0|0|0|0	0	-7.47	0.64	0.48
CG18747	CG6647	FBgn0004363	porin	3|4	7	3.5	2	6|1|7|13|13|2|11|2|4|4|13	0	-47.04	0.27	0.7
CG18747	CG4453	FBgn0061200	Nup153	9|4	13	6.5	2	11|2|15|63|70|23|53|10|13|7|9	0	-257.96	0.1	0.7
CG18747	CG3725	FBgn0263006	SERCA	13|14	27	13.5	2	9|2|21|16|13|9|10|9|5|7|13	0	-41.08	0.81	0.67
CG18747	CG8778	FBgn0033761	CG8778	8|4	12	6	2	14|0|6|13|12|5|5|2|6|4|6	0	-44.45	0.46	0.67
CG18747	CG6831	FBgn0260442	rhea	51|23	74	37	2	15|3|37|6|4|0|12|0|0|0|4	0	-41.75	1.73	0.6
CG18747	CG1691	FBgn0285926	Imp	2|0	2	1	2	0|0|0|9|8|0|6|0|0|0|3	0	-33.45	0.13	0.7
CG18747	CG3548	FBgn0035033	CG3548	6|3	9	4.5	2	46|2|53|0|0|0|6|0|0|0|2	0	-141.23	0.13	0.7
CG18747	CG31739	FBgn0051739	AspRS-m	2|3	5	2.5	2	1|0|3|40|33|7|14|7|3|4|17	0	-123.67	0.08	0.7
CG18747	CG4264	FBgn0266599	Hsc70-4	98|84	182	91	2	71|17|85|147|159|75|141|61|47|44|93	0	-419.97	0.61	0.69
CG18747	CG2960	FBgn0003941	RpL40	2|2	4	2	2	0|0|0|2|1|1|1|1|0|0|2	0.02	-3.86	1.2	0.42
CG18747	CG6838	FBgn0037182	ArfGAP3	3|0	3	1.5	2	0|0|3|5|5|0|7|0|0|0|8	0	-29.03	0.22	0.64
CG18747	CG4260	FBgn0264855	AP-2alpha	14|6	20	10	2	4|1|7|5|5|0|4|0|0|2|5	0.11	-12.16	1.76	0.36
CG18747	CG11881	FBgn0039638	dgt6	1|3	4	2	2	0|0|0|0|0|0|0|0|0|0|0	0.5	1.17	20	0.12
CG18747	CG1913	FBgn0003884	alphaTub84B	15|13	28	14	2	8|4|13|23|18|14|18|11|12|11|10	0	-52.37	0.71	0.68
CG18747	CG11888	FBgn0028692	Rpn2	13|6	19	9.5	2	8|0|10|12|15|5|11|7|4|7|9	0	-38.57	0.75	0.66
CG18747	CG43088	FBgn0262534	CG43088	2|1	3	1.5	2	0|0|0|6|9|0|4|0|2|2|4	0	-24.29	0.24	0.7
CG18747	CG7762	FBgn0028695	Rpn1	8|5	13	6.5	2	13|0|15|22|22|13|20|4|4|6|13	0	-76.87	0.3	0.7
CG18747	CG5499	FBgn0001197	His2Av	4|0	4	2	2	15|0|6|0|0|0|45|6|0|0|4	0	-96.04	0.09	0.7
CG18747	CG7769	FBgn0260962	pic	0|2	2	1	2	0|0|4|18|17|0|13|0|0|0|8	0	-70.56	0.06	0.7
CG18747	CG3395	FBgn0010408	RpS9	5|2	7	3.5	2	9|1|8|9|8|7|8|2|4|0|6	0	-31.45	0.4	0.7
CG18747	CG7838	FBgn0263855	BubR1	3|0	3	1.5	2	0|0|0|3|2|0|3|0|0|0|3	0	-12.88	0.5	0.51
CG18747	CG8479	FBgn0261276	Opa1	5|4	9	4.5	2	3|0|0|7|7|2|8|0|2|4|8	0	-22.83	0.59	0.64
CG18747	CG10641	FBgn0032731	Swip-1	14|10	24	12	2	4|3|5|6|9|2|11|0|2|0|4	0	-16.94	1.38	0.58
CG18747	CG7830	FBgn0032015	Ostgamma	8|8	16	8	2	7|0|3|0|0|8|0|3|5|6|0	0	-13.97	1.14	0.6
CG18747	CG8495	FBgn0261599	RpS29	2|2	4	2	2	2|0|1|2|2|0|0|0|2|2|0	0.01	-5.04	1	0.45
CG18747	CG18591	FBgn0261790	SmE	2|1	3	1.5	2	0|0|0|0|2|2|4|0|2|0|2	0	-9.13	0.56	0.52
CG18747	CG8390	FBgn0259978	vlc	4|2	6	3	2	0|0|3|5|4|0|3|0|0|0|0	0	-12.34	0.75	0.55
CG18747	CG8258	FBgn0284436	CCT8	6|3	9	4.5	2	15|3|10|9|10|0|19|2|0|3|15	0	-61.25	0.28	0.7
CG18747	CG4429	FBgn0262734	eIF4H1	2|2	4	2	2	1|0|4|5|2|1|8|1|0|0|5	0	-20.34	0.33	0.7
CG18747	CG32210	FBgn0262517	Ltn1	2|0	2	1	2	0|0|0|0|0|0|0|0|0|0|0	0.48	-1.34	10	0.17
CG18747	CG5695	FBgn0011225	jar	37|22	59	29.5	2	32|3|36|0|4|1|8|1|0|0|7	0	-57.43	1.16	0.67
CG18747	CG5692	FBgn0040080	pins	11|9	20	10	2	0|0|0|20|20|0|6|0|0|2|5	0	-42.48	0.65	0.67
CG18747	CG10944	FBgn0261592	RpS6	5|3	8	4	2	3|0|5|8|7|4|7|5|2|1|5	0	-23.55	0.55	0.63
CG18747	CG5119	FBgn0265297	pAbp	18|8	26	13	2	10|0|18|39|32|10|28|4|5|6|12	0	-118.07	0.39	0.69
CG18747	CG3265	FBgn0027066	Eb1	4|3	7	3.5	2	1|0|7|15|14|0|16|0|0|0|9	0	-55.54	0.23	0.7
CG18747	CG4581	FBgn0025352	Thiolase	2|2	4	2	2	5|0|5|8|8|0|6|0|0|0|8	0	-28.63	0.25	0.7
CG18747	CG4583	FBgn0261984	Ire1	6|5	11	5.5	2	0|0|0|0|0|0|0|0|0|0|0	1	8.47	55	0
CG18747	CG32699	FBgn0052699	LPCAT	3|0	3	1.5	2	5|0|0|2|0|3|1|0|2|3|1	0	-15.84	0.41	0.56
CG18747	CG8190	FBgn0034029	eIF2Bgamma	2|0	2	1	2	0|0|0|0|2|0|0|0|0|0|0	0.23	-3.51	1.5	0.31
CG18747	CG14996	FBgn0035499	Chd64	2|2	4	2	2	4|0|8|9|8|0|17|2|0|0|9	0	-44.02	0.17	0.7
CG18747	CG11949	FBgn0010434	cora	16|8	24	12	2	3|0|11|7|7|0|15|0|0|0|4	0	-28.24	1.09	0.62
CG18747	CG4848	FBgn0037998	Cog1	2|0	2	1	2	0|0|0|0|0|0|0|0|0|0|0	0.48	-1.34	10	0.17
CG18747	CG11943	FBgn0031078	Nup205	3|0	3	1.5	2	3|0|2|2|0|0|5|0|0|0|0	0	-14.37	0.45	0.54
CG18747	CG5581	FBgn0266420	Ote	6|4	10	5	2	138|15|135|8|7|3|31|3|3|1|8	0	-431.04	0.05	0.7
CG18747	CG10882	FBgn0262126	Sec24CD	2|0	2	1	2	0|0|7|4|4|0|4|0|0|0|2	0	-21.63	0.2	0.62
CG18747	CG18290	FBgn0000046	Act87E	89|51	140	70	2	89|0|134|45|38|31|57|0|0|9|32	0	-265.26	0.75	0.69
CG18747	CG9916	FBgn0004432	Cyp1	5|3	8	4	2	2|3|12|12|9|0|21|0|4|0|11	0	-55.35	0.27	0.7
CG18747	CG15667	FBgn0026369	Sara	2|0	2	1	2	0|0|0|0|0|0|0|0|0|0|0	0.48	-1.34	10	0.17
CG18747	CG11376	FBgn0031216	Zir	2|0	2	1	2	0|0|0|0|0|0|0|0|0|0|0	0.48	-1.34	10	0.17
CG18747	CG10289	FBgn0035688	CG10289	8|0	8	4	2	2|0|3|2|0|0|4|0|0|0|0	0.21	-12.88	1.33	0.33
CG18747	CG3724	FBgn0004654	Pgd	2|0	2	1	2	0|1|5|5|4|0|4|0|0|0|7	0	-24.61	0.18	0.7
CG18747	CG5604	FBgn0032208	Ufd4	4|2	6	3	2	0|0|0|0|0|0|0|0|0|0|0	0.98	3.2	30	0
CG18747	CG2221	FBgn0028331	l(1)G0289	3|0	3	1.5	2	2|0|2|5|5|1|3|3|0|0|1	0	-18.74	0.35	0.58
CG18747	CG14695	FBgn0037850	CG14695	2|1	3	1.5	2	5|0|1|0|0|3|0|2|3|4|0	0	-14.45	0.38	0.59
CG18747	CG14792	FBgn0003517	sta	4|5	9	4.5	2	8|2|10|12|4|7|8|6|5|6|7	0	-32.12	0.45	0.7
CG18747	CG5602	FBgn0262619	DNA-ligI	3|2	5	2.5	2	0|0|3|3|4|0|0|0|0|0|0	0	-9.84	0.75	0.53
CG18747	CG2146	FBgn0261397	didum	69|43	112	56	2	28|6|59|3|0|0|8|4|5|0|5	0	-50.17	1.77	0.65
CG18747	CG14813	FBgn0028969	deltaCOP	5|2	7	3.5	2	2|0|9|20|23|3|13|0|0|7|9	0	-74.47	0.19	0.7
CG18747	CG15189	FBgn0037429	Osi19	2|0	2	1	2	0|0|0|0|0|0|0|0|2|0|0	0.23	-3.51	1.5	0.31
CG18747	CG2065	FBgn0033204	CG2065	4|2	6	3	2	0|0|0|4|5|0|4|0|0|0|3	0	-13.68	0.69	0.57
CG18747	CG3416	FBgn0002787	Rpn8	2|0	2	1	2	0|0|0|5|5|0|3|0|0|0|4	0	-20.21	0.21	0.61
CG18747	CG3644	FBgn0000181	bic	1|1	2	1	2	0|0|5|17|19|1|29|1|1|1|9	0	-91.23	0.05	0.7
CG18747	CG18619	FBgn0032202	REPTOR-BP	2|0	2	1	2	0|0|0|1|2|0|0|0|0|0|0	0.09	-4.37	1	0.36
CG18747	CG6988	FBgn0014002	Pdi	4|5	9	4.5	2	6|0|12|46|33|3|42|3|6|3|28	0	-162.43	0.11	0.7
CG18747	CG34417	FBgn0085446	CG34417	16|9	25	12.5	2	5|3|15|0|0|0|8|0|0|0|5	0	-20.34	1.34	0.58
CG18747	CG8427	FBgn0023167	SmD3	2|0	2	1	2	4|0|0|2|2|0|15|0|0|0|3	0	-31.2	0.14	0.7
CG18747	CG3443	FBgn0003048	pcx	2|0	2	1	2	0|0|0|0|0|0|0|0|0|0|0	0.48	-1.34	10	0.17
CG18747	CG3922	FBgn0005533	RpS17	13|9	22	11	2	13|0|8|17|13|16|10|7|10|5|3	0	-43.09	0.72	0.67
CG18747	CG17286	FBgn0027500	spd-2	4|0	4	2	2	0|0|0|0|0|0|0|0|0|0|0	0.5	-1.34	20	0.1
CG18747	CG6146	FBgn0004924	Top1	14|3	17	8.5	2	0|0|0|0|0|0|3|0|0|2|0	0.54	-2.38	5.1	0.07
CG18747	CG10370	FBgn0028684	Rpt5	6|5	11	5.5	2	6|0|5|12|17|7|11|3|7|2|5	0	-43.45	0.41	0.7
CG18747	CG2033	FBgn0010198	RpS15Aa	8|5	13	6.5	2	5|1|5|11|9|7|6|2|6|3|8	0	-27.4	0.7	0.65
CG18747	CG6141	FBgn0015756	RpL9	2|2	4	2	2	2|1|3|5|6|0|5|3|3|0|4	0	-17.66	0.38	0.7
CG18747	CG8472	FBgn0000253	Cam	17|10	27	13.5	2	9|2|11|3|4|0|12|0|0|0|10	0	-25.15	1.23	0.61
CG18747	CG6020	FBgn0037001	ND-39	2|0	2	1	2	0|0|0|4|0|0|3|0|3|4|0	0	-15.84	0.27	0.58
CG18747	CG6148	FBgn0016693	Past1	9|7	16	8	2	5|0|5|5|5|3|8|0|3|4|5	0	-11.89	1.33	0.55
CG18747	CG10279	FBgn0003261	Rm62	18|12	30	15	2	5|2|11|40|40|12|33|7|14|7|18	0	-127.16	0.4	0.69
CG18747	CG12749	FBgn0004237	Hrb87F	0|2	2	1	2	0|0|0|3|4|0|5|0|0|0|0	0	-17.24	0.25	0.59
CG18747	CG2139	FBgn0028646	aralar1	6|6	12	6	2	5|0|3|4|6|5|0|4|12|4|0	0	-19.12	0.78	0.63
CG18747	CG11133	FBgn0037205	BoYb	4|0	4	2	2	0|0|0|4|2|0|0|0|0|0|0	0.06	-8.33	1	0.38
CG18747	CG10277	FBgn0037442	godzilla	2|2	4	2	2	0|0|0|1|1|0|0|0|0|0|0	0.41	-0.38	3	0.28
CG18747	CG9677	FBgn0025582	eIF3e	2|2	4	2	2	3|0|0|5|0|0|3|0|0|0|4	0	-12.34	0.5	0.58
CG18747	CG7635	FBgn0030993	Mec2	8|6	14	7	2	8|1|4|7|6|5|4|0|5|0|3	0	-16.86	1	0.6
CG18747	CG42279	FBgn0259174	Nedd4	2|2	4	2	2	0|0|0|2|0|0|2|0|0|0|0	0.06	-2.81	1.5	0.38
CG18747	CG42274	FBgn0261461	RhoGAP18B	5|0	5	2.5	2	0|0|0|8|6|0|2|0|0|0|0	0	-22.97	0.47	0.59
CG18747	CG8983	FBgn0033663	ERp60	4|4	8	4	2	4|5|16|45|36|0|36|3|4|2|24	0	-156.52	0.1	0.7
CG18747	CG18428	FBgn0039149	CG18428	1|2	3	1.5	2	0|0|0|0|0|0|3|0|0|0|1	0.04	-4.04	1.12	0.39
CG18747	CG16840	FBgn0032329	Art8	1|2	3	1.5	2	0|0|0|0|0|0|0|0|0|0|0	0.48	1.17	15	0.17
CG18747	CG1512	FBgn0032956	Cul2	2|0	2	1	2	0|0|0|3|2|0|2|0|0|0|2	0	-10.06	0.43	0.49
CG18747	CG33303	FBgn0053303	CG33303	11|5	16	8	2	5|2|8|9|7|8|6|8|11|13|5	0	-33.99	0.73	0.65
CG18747	CG2158	FBgn0033264	Nup50	8|6	14	7	2	13|1|12|39|36|14|35|8|6|7|14	0	-139.68	0.19	0.7
CG18747	CG11793	FBgn0003462	Sod1	2|2	4	2	2	0|1|3|5|4|0|6|0|0|0|5	0	-17.66	0.38	0.7
CG18747	CG11154	FBgn0010217	ATPsynbeta	20|21	41	20.5	2	24|5|32|63|62|12|69|15|13|14|46	0	-219.61	0.32	0.7
CG18747	CG5519	FBgn0261119	Prp19	3|0	3	1.5	2	7|0|2|11|11|2|13|0|0|0|3	0	-51.24	0.13	0.7
CG18747	CG1812	FBgn0031119	CG1812	2|0	2	1	2	0|0|0|0|0|0|0|0|0|0|0	0.48	-1.34	10	0.17
CG18747	CG8857	FBgn0033699	RpS11	3|3	6	3	2	0|0|0|4|6|3|5|2|3|2|4	0	-14.36	0.6	0.6
CG18747	CG10539	FBgn0283472	S6k	1|3	4	2	2	4|0|3|2|1|2|0|0|0|0|2	0	-10.38	0.67	0.51
CG18747	CG11092	FBgn0027537	Nup93-1	2|2	4	2	2	8|0|1|3|4|0|6|0|2|2|3	0	-20.34	0.33	0.7
CG18747	CG13900	FBgn0035162	Sf3b3	2|0	2	1	2	0|0|0|17|15|0|4|0|0|0|3	0	-52.11	0.08	0.7
CG18747	CG10306	FBgn0034654	eIF3k	2|0	2	1	2	0|0|0|4|5|0|3|0|0|0|2	0	-17.24	0.25	0.59
CG18747	CG10305	FBgn0261597	RpS26	2|2	4	2	2	2|0|3|3|3|4|3|0|0|0|2	0	-9.84	0.6	0.55
CG18747	CG7139	FBgn0027532	CG7139	2|2	4	2	2	0|0|0|0|2|0|2|0|0|0|0	0.06	-2.81	1.5	0.38
CG18747	CG6459	FBgn0034259	P32	4|3	7	3.5	2	0|0|0|8|10|3|8|2|4|0|6	0	-28.98	0.4	0.66
CG18747	CG4463	FBgn0001224	Hsp23	4|0	4	2	2	5|0|3|0|0|0|0|0|0|0|0	0.01	-11.29	0.75	0.44
CG18747	CG6512	FBgn0036702	CG6512	3|0	3	1.5	2	1|0|3|4|3|4|4|2|3|6|4	0	-20.21	0.32	0.7
CG18747	CG4464	FBgn0010412	RpS19a	2|2	4	2	2	8|0|7|6|7|5|11|3|5|5|8	0	-32.83	0.22	0.7
CG18747	CG1341	FBgn0028687	Rpt1	29|18	47	23.5	2	18|4|12|17|16|19|15|8|16|18|11	0	-39.4	1.28	0.65
CG18747	CG6450	FBgn0029688	lva	52|33	85	42.5	2	29|2|57|12|9|0|23|0|0|0|10	0	-80.19	1.17	0.68
CG18747	CG6453	FBgn0032643	GCS2beta	3|2	5	2.5	2	0|0|0|3|4|0|2|0|2|0|3	0	-9.84	0.75	0.53
CG18747	CG6455	FBgn0019960	Mitofilin	2|3	5	2.5	2	5|2|3|2|2|0|11|0|2|2|3	0	-21.35	0.39	0.63
CG18747	CG18495	FBgn0263121	Prosalpha1	1|1	2	1	2	2|0|2|9|9|5|8|3|3|3|6	0	-34.33	0.12	0.7
CG18747	CG5014	FBgn0029687	Vap33	8|2	10	5	2	4|0|4|9|7|4|10|2|6|2|3	0	-31.45	0.58	0.64
CG18747	CG12233	FBgn0027291	l(1)G0156	11|7	18	9	2	9|0|6|12|8|14|6|9|9|9|6	0	-32.66	0.77	0.66
CG18747	CG31352	FBgn0051352	Unc-115a	30|8	38	19	2	3|0|12|23|27|4|9|3|2|2|9	0	-66.12	0.92	0.66
CG18747	CG8351	FBgn0037632	CCT7	6|3	9	4.5	2	4|2|2|7|8|0|15|0|0|0|11	0	-40.09	0.4	0.67
CG18747	CG14542	FBgn0039402	Vps2	7|2	9	4.5	2	14|0|19|0|0|0|2|0|0|0|0	0	-43.42	0.39	0.66
CG18747	CG5374	FBgn0003676	CCT1	6|4	10	5	2	5|0|6|18|14|3|18|4|4|3|12	0	-59.85	0.3	0.7
CG18747	CG1250	FBgn0262125	Sec23	2|0	2	1	2	0|0|0|10|4|0|5|0|0|0|0	0	-27.41	0.16	0.64
CG18747	CG6961	FBgn0030959	CG6961	5|5	10	5	2	3|1|6|87|77|7|20|5|5|7|18	0	-249.66	0.08	0.7
CG18747	CG6963	FBgn0250823	gish	5|0	5	2.5	2	0|0|0|4|0|0|0|0|0|0|0	0.34	-5.41	1.88	0.29
CG18747	CG3456	FBgn0023549	Mct1	2|3	5	2.5	2	0|0|0|0|0|0|0|0|0|0|0	0.98	3.2	25	0
CG18747	CG5395	FBgn0005322	nmd	3|2	5	2.5	2	3|0|2|1|2|2|0|1|1|2|0	0.01	-6.23	1.07	0.45
CG18747	CG3455	FBgn0028685	Rpt4	2|3	5	2.5	2	6|2|2|3|4|1|5|1|0|0|3	0	-16.29	0.5	0.6
CG18747	CG18542	FBgn0037731	CG18542	1|1	2	1	2	0|0|0|0|0|0|0|0|0|0|0	0	1.17	10	0.7
CG18747	CG32417	FBgn0040298	Myt1	2|2	4	2	2	0|0|0|0|0|0|0|0|0|2|0	0.46	-0.16	3	0.27
CG18747	CG11027	FBgn0013749	Arf102F	5|2	7	3.5	2	0|0|0|0|0|0|0|0|0|0|0	0.98	3.2	35	0
CG18747	CG6214	FBgn0032456	MRP	14|5	19	9.5	2	11|3|15|28|19|16|19|9|2|8|6	0	-79.7	0.43	0.68
CG18747	CG1883	FBgn0039757	RpS7	13|11	24	12	2	22|0|12|27|28|36|19|19|13|7|8	0	-99.19	0.4	0.7
CG18747	CG17520	FBgn0264492	CkIIalpha	3|0	3	1.5	2	0|0|0|14|8|0|7|0|2|0|2	0	-42.25	0.16	0.7
CG18747	CG7863	FBgn0033051	Strica	21|12	33	16.5	2	9|2|16|16|19|8|9|2|5|4|6	0	-44	0.97	0.66
CG18747	CG9412	FBgn0015778	rin	6|3	9	4.5	2	0|0|5|9|11|0|11|0|2|2|12	0	-40.03	0.4	0.67
CG18747	CG17528	FBgn0261387	CG17528	2|1	3	1.5	2	0|0|0|2|2|0|2|0|0|0|0	0	-6.47	0.75	0.46
CG18747	CG2671	FBgn0002121	l(2)gl	2|0	2	1	2	0|0|0|2|0|0|0|0|0|0|0	0.23	-3.51	1.5	0.31
CG18747	CG9998	FBgn0005411	U2af50	4|1	5	2.5	2	0|0|0|14|12|3|6|0|3|5|2	0	-42.89	0.23	0.7
CG18747	CG1451	FBgn0015589	Apc	3|0	3	1.5	2	0|0|0|0|0|0|0|0|0|0|3	0.25	-3.93	1.5	0.3
CG18747	CG42674	FBgn0261556	CG42674	2|0	2	1	2	0|0|0|5|3|0|0|0|0|0|2	0	-14.37	0.3	0.56
CG18747	CG8947	FBgn0250848	26-29-p	1|1	2	1	2	0|0|0|2|1|0|0|0|0|0|0	0	-2.97	1	0.7
CG18747	CG14712	FBgn0037924	CG14712	2|2	4	2	2	13|0|13|31|34|17|45|15|13|6|13	0	-153.75	0.05	0.7
CG18747	CG4560	FBgn0038369	Arpc3A	7|7	14	7	2	7|0|5|0|3|0|3|0|0|0|3	0	-8.4	1.4	0.52
CG18747	CG5166	FBgn0041188	Atx2	3|0	3	1.5	2	0|0|0|7|10|0|6|0|0|0|0	0	-33.45	0.2	0.65
CG18747	CG3356	FBgn0034989	CG3356	4|0	4	2	2	0|0|0|4|2|2|0|0|6|3|0	0	-18.74	0.46	0.57
CG18747	CG3609	FBgn0031418	CG3609	2|0	2	1	2	0|0|0|2|3|0|2|0|0|0|3	0	-11.52	0.38	0.52
CG18747	CG3195	FBgn0034968	RpL12	3|2	5	2.5	2	0|0|0|6|4|0|13|0|2|0|6	0	-29.82	0.3	0.66
CG18747	CG3210	FBgn0026479	Drp1	2|1	3	1.5	2	3|0|3|2|4|0|2|0|0|2|2	0	-11.77	0.45	0.56
CG18747	CG7816	FBgn0039714	Zip99C	1|1	2	1	2	0|0|0|0|0|0|2|0|0|0|2	0	-4.24	0.75	0.7
CG18747	CG4934	FBgn0000221	brn	2|3	5	2.5	2	1|0|2|2|3|2|0|1|4|3|2	0	-9.84	0.75	0.53
CG18747	CG1106	FBgn0010225	Gel	7|2	9	4.5	2	0|0|0|0|2|0|3|0|0|0|2	0.32	-6.23	1.93	0.29
CG18747	CG15437	FBgn0027609	morgue	2|2	4	2	2	0|0|0|3|2|0|0|0|0|0|0	0.02	-3.79	1.2	0.41
CG18747	CG1105	FBgn0037465	CG1105	3|0	3	1.5	2	0|0|0|0|0|0|0|0|0|0|0	0.5	-1.34	15	0.12
CG18747	CG1100	FBgn0028690	Rpn5	2|1	3	1.5	2	1|0|3|3|3|0|3|0|0|0|5	0	-13.14	0.41	0.58
CG18747	CG1101	FBgn0010774	Ref1	4|1	5	2.5	2	1|0|2|4|4|0|20|0|0|0|8	0	-42.23	0.23	0.67
CG18747	CG12306	FBgn0003124	polo	2|0	2	1	2	0|0|0|2|0|0|4|0|0|0|1	0	-10.06	0.43	0.49
CG18747	CG11876	FBgn0039635	CG11876	5|6	11	5.5	2	6|0|7|3|2|2|6|3|4|3|5	0	-16.01	0.87	0.6
CG18747	CG32744	FBgn0086558	Ubi-p5E	2|2	4	2	2	0|0|0|2|1|1|1|1|0|0|2	0.02	-3.86	1.2	0.42
CG18747	CG4164	FBgn0031256	shv	13|10	23	11.5	2	10|0|12|52|55|16|26|9|9|13|15	0	-159.9	0.26	0.7
CG18747	CG5704	FBgn0026570	CG5704	2|0	2	1	2	0|0|0|0|0|0|0|0|0|0|0	0.48	-1.34	10	0.17
CG18747	CG4169	FBgn0250814	UQCR-C2	21|17	38	19	2	19|3|18|30|29|25|20|18|22|19|14	0	-77.06	0.68	0.69
CG18747	CG5700	FBgn0028573	prc	0|2	2	1	2	0|0|0|0|0|0|0|0|0|0|0	0.48	-1.34	10	0.17
CG18747	CG18811	FBgn0042134	Capr	4|1	5	2.5	2	0|0|0|5|7|0|5|0|0|0|6	0	-22.85	0.42	0.62
CG18747	CG8439	FBgn0010621	CCT5	3|4	7	3.5	2	3|0|4|8|6|0|11|0|0|0|3	0	-27.61	0.42	0.65
CG18747	CG4609	FBgn0014163	fax	6|3	9	4.5	2	3|0|4|11|10|0|17|0|3|0|11	0	-47.04	0.35	0.67
CG18747	CG9635	FBgn0023172	RhoGEF2	2|1	3	1.5	2	0|0|0|4|3|0|2|0|0|0|2	0	-10.38	0.5	0.54
CG18747	CG7597	FBgn0037093	Cdk12	4|3	7	3.5	2	0|0|0|0|0|0|4|0|0|2|0	0.07	-3.34	1.75	0.37
CG18747	CG7897	FBgn0266580	Gp210	8|7	15	7.5	2	6|0|17|15|12|16|20|6|7|7|10	0	-56.57	0.42	0.7
CG18747	CG9633	FBgn0010173	RpA-70	9|6	15	7.5	2	152|37|172|5|7|0|12|0|0|0|9	0	-506.68	0.06	0.7
CG18747	CG4800	FBgn0037874	Tctp	3|3	6	3	2	0|1|3|10|11|0|13|0|2|0|9	0	-40.03	0.26	0.7
CG18747	CG5266	FBgn0086134	Prosalpha2	2|2	4	2	2	0|0|0|2|3|0|3|0|2|3|0	0	-8.55	0.67	0.53
CG18747	CG2093	FBgn0033194	Vps13	1|1	2	1	2	0|0|0|2|2|0|0|0|0|0|0	0	-4.24	0.75	0.7
CG18747	CG2092	FBgn0261385	scra	2|1	3	1.5	2	1|1|2|0|0|0|5|0|0|0|1	0	-9.04	0.56	0.52
CG18747	CG9022	FBgn0014868	Ost48	4|5	9	4.5	2	3|2|8|6|4|3|8|3|2|7|5	0	-22.83	0.59	0.64
CG18747	CG3589	FBgn0035065	CG3589	2|3	5	2.5	2	0|0|0|0|0|0|0|0|0|0|0	0.98	3.2	25	0
CG18747	CG1856	FBgn0003870	ttk	3|0	3	1.5	2	21|3|23|0|0|0|11|0|0|0|0	0	-80.71	0.08	0.7
CG18747	CG12012	FBgn0035444	CG12012	4|0	4	2	2	0|0|0|0|0|0|0|0|0|0|0	0.5	-1.34	20	0.1
CG18747	CG10578	FBgn0263106	DnaJ-1	5|4	9	4.5	2	2|0|5|5|2|0|3|0|2|3|0	0	-10.37	1.04	0.54
CG18747	CG10579	FBgn0005640	Eip63E	2|0	2	1	2	0|0|3|12|12|5|2|3|2|0|4	0	-42.19	0.1	0.7
CG18747	CG8649	FBgn0024238	Fim	2|3	5	2.5	2	0|1|3|16|12|0|16|0|0|0|10	0	-57.13	0.17	0.7
CG18747	CG6779	FBgn0002622	RpS3	19|18	37	18.5	2	40|2|33|36|37|36|30|15|31|25|17	0	-113.27	0.49	0.7
CG18747	CG5827	FBgn0261608	RpL37A	2|0	2	1	2	1|0|2|2|3|2|3|3|0|0|2	0	-12.88	0.33	0.54
CG18747	CG17257	FBgn0031495	GABPI	2|0	2	1	2	0|0|0|0|0|0|0|0|0|0|0	0.48	-1.34	10	0.17
CG18747	CG7070	FBgn0267385	PyK	4|2	6	3	2	4|1|13|27|21|3|30|3|2|3|14	0	-106.69	0.12	0.7
CG18747	CG8636	FBgn0029629	eIF3g1	2|1	3	1.5	2	0|0|0|2|4|0|2|0|0|0|2	0	-9.13	0.56	0.52
CG18747	CG31137	FBgn0011725	twin	2|4	6	3	2	0|0|0|4|5|0|0|0|0|0|0	0	-8.23	1	0.47
CG18747	CG5838	FBgn0015664	Dref	4|2	6	3	2	8|0|5|4|2|5|1|4|0|0|3	0	-20.34	0.5	0.62
CG18747	CG5190	FBgn0034351	rswl	2|0	2	1	2	0|0|0|4|3|2|0|2|0|0|0	0	-12.88	0.33	0.54
CG18747	CG43741	FBgn0263998	Ack-like	3|2	5	2.5	2	0|0|0|19|27|0|5|0|0|0|5	0	-66.36	0.15	0.7
CG18747	CG17870	FBgn0004907	14-3-3zeta	6|0	6	3	2	5|0|5|20|20|0|27|2|3|0|22	0	-101.88	0.13	0.7
CG18747	CG16973	FBgn0010909	msn	4|3	7	3.5	2	3|0|8|54|47|2|23|3|0|0|19	0	-169.69	0.08	0.7
CG18747	CG4376	FBgn0000667	Actn	9|3	12	6	2	3|0|2|4|1|0|6|0|0|0|1	0.02	-11.89	1.38	0.42
CG18747	CG31729	FBgn0051729	CG31729	5|4	9	4.5	2	0|0|3|2|0|0|2|0|0|0|0	0.08	-3.35	1.93	0.37
CG18747	CG5170	FBgn0027835	Dp1	4|4	8	4	2	0|0|5|21|19|0|14|0|0|0|11	0	-65.49	0.22	0.7
CG18747	CG10610	FBgn0028436	ECSIT	4|1	5	2.5	2	0|0|0|16|13|2|9|0|0|0|6	0	-51.75	0.2	0.7
CG18747	CG6253	FBgn0017579	RpL14	4|3	7	3.5	2	6|2|7|10|10|4|13|3|3|3|11	0	-40.03	0.31	0.7
CG18747	CG8863	FBgn0038145	Droj2	14|12	26	13	2	14|3|14|33|28|15|12|9|13|22|11	0	-86.05	0.47	0.7
CG18747	CG6251	FBgn0034118	Nup62	5|3	8	4	2	0|1|2|0|2|0|16|0|0|0|0	0	-19.94	0.6	0.62
CG18747	CG11897	FBgn0039644	CG11897	2|0	2	1	2	1|0|2|0|0|0|0|0|0|0|0	0.09	-4.37	1	0.36
CG18747	CG32529	FBgn0052529	Hers	0|2	2	1	2	0|0|0|0|0|0|0|0|0|0|0	0.48	-1.34	10	0.17
CG18747	CG6259	FBgn0036740	Vps60	2|1	3	1.5	2	11|3|7|0|0|0|4|0|0|0|0	0	-28.43	0.2	0.7
CG18747	CG6258	FBgn0028700	RfC38	2|2	4	2	2	24|0|12|5|4|0|5|0|2|2|2	0	-52	0.15	0.7
CG18747	CG42236	FBgn0262114	RanBPM	1|1	2	1	2	0|0|0|2|3|0|0|0|0|0|0	0	-5.34	0.6	0.7
CG18747	CG11107	FBgn0033160	Dhx15	3|3	6	3	2	3|0|2|3|2|0|4|0|0|2|1	0	-8.3	0.9	0.52
CG18747	CG9148	FBgn0025682	scf	2|4	6	3	2	0|1|6|8|5|0|7|0|0|0|7	0	-25.86	0.41	0.64
CG18747	CG10954	FBgn0032859	Arpc2	14|7	21	10.5	2	2|0|4|0|3|0|3|0|2|0|2	0.53	-2.7	3.15	0.07
CG18747	CG8542	FBgn0001220	Hsc70-5	8|10	18	9	2	17|4|23|43|37|10|53|8|6|6|27	0	-166.48	0.2	0.7
CG18747	CG14206	FBgn0285947	RpS10b	4|4	8	4	2	5|0|7|11|14|6|16|2|10|6|6	0	-47.24	0.29	0.7
CG18747	CG8548	FBgn0024889	Kap-alpha1	4|2	6	3	2	0|0|0|4|3|0|2|0|0|0|0	0	-8.55	1	0.48
CG18747	CG18212	FBgn0038535	alt	3|3	6	3	2	0|1|3|5|3|0|7|0|2|0|5	0	-16.96	0.53	0.62
CG18747	CG45186	FBgn0266696	Svil	72|33	105	52.5	2	53|4|52|13|31|2|53|3|3|2|16	0	-142.44	1	0.69
CG18747	CG8385	FBgn0010348	Arf79F	10|4	14	7	2	1|2|4|9|6|0|10|0|1|2|7	0	-26.78	0.81	0.62
CG18747	CG3167	FBgn0034962	MAN1	4|3	7	3.5	2	12|2|12|0|0|0|0|0|0|0|2	0	-28.45	0.4	0.66
CG18747	CG8262	FBgn0027513	ana2	3|0	3	1.5	2	0|0|0|2|4|0|0|0|0|0|0	0.02	-8.33	0.75	0.42
CG18747	CG32164	FBgn0042177	CG32164	2|0	2	1	2	0|0|0|1|1|0|0|0|0|0|0	0.2	-3.38	1.5	0.33
CG18747	CG8264	FBgn0004856	Bx42	2|0	2	1	2	0|0|0|2|3|0|17|0|0|0|2	0	-30.98	0.14	0.7
CG18747	CG11579	FBgn0000117	arm	8|0	8	4	2	0|0|3|0|0|0|0|0|0|0|0	0.47	-3.93	4	0.27
CG18747	CG7028	FBgn0027587	CG7028	0|2	2	1	2	0|0|0|0|0|0|2|0|0|0|1	0.09	-4.37	1	0.36
CG18747	CG31794	FBgn0041789	Pax	2|0	2	1	2	0|0|7|7|6|0|7|0|0|0|2	0	-30.47	0.14	0.7
CG18747	CG3157	FBgn0260639	gammaTub23C	5|5	10	5	2	3|0|4|9|11|7|4|0|0|3|5	0	-26.08	0.56	0.65
CG18747	CG2910	FBgn0027548	nito	3|3	6	3	2	0|0|0|42|38|0|23|0|1|3|14	0	-139.23	0.09	0.7
CG18747	CG11624	FBgn0003943	Ubi-p63E	4|4	8	4	2	1|0|3|4|2|1|2|1|1|1|3	0	-6.84	1.2	0.49
CG18747	CG10686	FBgn0041775	tral	1|1	2	1	2	0|0|0|12|13|0|19|0|0|0|5	0	-60.53	0.07	0.7
CG18747	CG10687	FBgn0086443	AsnRS	3|2	5	2.5	2	0|0|0|4|4|0|2|0|1|1|2	0	-9.84	0.75	0.53
CG18747	CG10689	FBgn0086444	l(2)37Cb	2|3	5	2.5	2	0|0|0|0|0|4|2|0|0|0|0	0.02	-4.8	1.25	0.41
CG18747	CG3251	FBgn0031622	CG3251	3|1	4	2	2	0|0|0|0|0|0|0|0|0|0|0	0.5	1.17	20	0.12
CG18747	CG4972	FBgn0032217	CG4972	8|5	13	6.5	2	2|0|3|7|5|4|2|1|7|9|0	0	-20.98	0.85	0.62
CG18747	CG6223	FBgn0008635	betaCOP	6|4	10	5	2	7|0|9|27|23|2|9|1|2|7|11	0	-74.95	0.25	0.7
CG18747	CG32000	FBgn0052000	CG32000	2|0	2	1	2	0|0|0|0|0|0|0|0|0|0|0	0.48	-1.34	10	0.17
CG18747	CG4994	FBgn0026409	Mpcp2	3|3	6	3	2	0|3|3|6|5|5|5|2|4|4|0	0	-15.66	0.56	0.7
CG18747	CG14476	FBgn0027588	GCS2alpha	3|5	8	4	2	1|1|5|10|10|8|9|0|5|4|5	0	-33.09	0.41	0.7
CG18747	CG7911	FBgn0039735	Nph	4|4	8	4	2	2|0|2|9|9|1|4|1|4|0|5	0	-22.83	0.52	0.64
CG18747	CG14472	FBgn0011230	poe	4|6	10	5	2	5|0|5|2|2|4|3|0|4|1|2	0	-11.56	1.07	0.54
CG18747	CG4853	FBgn0034230	CG4853	4|2	6	3	2	0|0|0|0|0|0|0|0|0|0|0	0.98	3.2	30	0
CG18747	CG3523	FBgn0283427	FASN1	3|0	3	1.5	2	2|0|15|12|6|0|14|0|0|0|9	0	-60.16	0.11	0.7
CG18747	CG2919	FBgn0261004	asl	3|0	3	1.5	2	0|0|0|0|0|0|0|0|0|0|0	0.5	-1.34	15	0.12
CG18747	CG8166	FBgn0034013	unc-5	2|2	4	2	2	0|0|0|0|0|0|0|0|0|0|0	0.96	3.2	20	0.01
CG18747	CG7852	FBgn0035229	pns	2|0	2	1	2	0|0|0|0|0|0|0|0|0|0|0	0.48	-1.34	10	0.17
CG18747	CG4729	FBgn0036623	CG4729	4|3	7	3.5	2	2|1|2|0|0|0|0|0|3|4|0	0	-7.12	1.17	0.47
CG18747	CG3731	FBgn0038271	UQCR-C1	2|3	5	2.5	2	3|1|2|9|7|3|7|1|2|2|7	0	-27.26	0.33	0.7
CG18747	CG3004	FBgn0264691	Lst8	2|2	4	2	2	0|0|0|2|4|3|3|1|0|0|2	0	-9.84	0.6	0.55
CG18747	CG10060	FBgn0001104	Galphai	2|2	4	2	2	2|0|2|3|2|0|1|0|0|0|2	0	-6.23	0.86	0.48
CG18747	CG2238	FBgn0000559	eEF2	14|8	22	11	2	7|6|28|59|41|0|45|4|7|2|28	0	-183.64	0.23	0.7
CG18747	CG9805	FBgn0037249	eIF3a	2|0	2	1	2	0|0|3|14|14|0|12|0|0|0|7	0	-58.67	0.07	0.7
CG18747	CG11561	FBgn0003444	smo	2|0	2	1	2	0|0|0|0|0|0|0|0|0|0|0	0.48	-1.34	10	0.17
CG18747	CG3638	FBgn0261444	CG3638	5|4	9	4.5	2	0|0|0|0|0|0|0|0|0|0|0	1	6.79	45	0
CG18747	CG3322	FBgn0267348	LanB2	4|2	6	3	2	0|0|0|11|11|0|6|0|0|0|4	0	-34.26	0.32	0.66
CG18747	CG3637	FBgn0025865	Cortactin	11|8	19	9.5	2	0|1|11|7|8|0|10|0|2|1|2	0	-23.43	0.98	0.63
CG18747	CG6551	FBgn0001079	fu	2|0	2	1	2	0|0|0|0|2|2|0|0|0|0|0	0.03	-5.93	0.75	0.4
CG18747	CG2050	FBgn0002780	mod	3|3	6	3	2	2|2|11|10|11|0|59|0|0|0|11	0	-105.92	0.11	0.7
CG18747	CG2199	FBgn0035213	CG2199	2|0	2	1	2	10|1|12|0|0|0|27|0|0|0|2	0	-71.35	0.06	0.7
CG18747	CG12051	FBgn0000043	Act42A	202|120	322	161	2	179|4|234|0|0|68|121|12|0|4|0	0	-462.77	0.9	0.69
CG18747	CG1399	FBgn0033212	LRR	7|3	10	5	2	0|0|3|0|0|0|0|0|0|0|0	0.7	0.03	5	0.03
CG18747	CG12052	FBgn0283521	lola	6|3	9	4.5	2	11|1|13|5|5|0|6|0|0|2|3	0	-34.43	0.45	0.66
CG18747	CG4389	FBgn0028479	Mtpalpha	3|2	5	2.5	2	4|3|6|13|11|2|17|2|0|2|15	0	-58.56	0.17	0.7
CG18747	CG17299	FBgn0264357	SNF4Agamma	7|4	11	5.5	2	1|1|4|34|27|7|3|4|8|6|3	0	-85.97	0.24	0.7
CG18747	CG18748	FBgn0042105	CG18748	3|0	3	1.5	2	0|0|0|0|0|0|0|0|0|0|0	0.5	-1.34	15	0.12
CG18747	CG17291	FBgn0260439	Pp2A-29B	3|10	13	6.5	2	4|0|4|7|11|0|8|0|4|2|7	0	-28.98	0.75	0.62
CG18747	CG3937	FBgn0014141	cher	26|21	47	23.5	2	17|1|29|15|10|0|44|0|0|2|21	0	-81.87	0.75	0.69
CG18747	CG32018	FBgn0011642	Zyx	3|1	4	2	2	0|0|0|0|0|0|0|0|0|0|0	0.5	1.17	20	0.12
CG18747	CG4651	FBgn0011272	RpL13	4|2	6	3	2	5|5|6|9|7|2|13|4|3|0|5	0	-35.68	0.31	0.7
CG18747	CG6137	FBgn0000146	aub	4|6	10	5	2	0|0|0|2|0|0|0|0|3|4|0	0.03	-5.67	1.67	0.41
CG18747	CG2512	FBgn0003885	alphaTub84D	15|13	28	14	2	8|4|13|23|18|14|18|11|12|11|10	0	-52.37	0.71	0.68
CG18747	CG7033	FBgn0030086	CCT2	6|4	10	5	2	5|3|4|21|14|0|26|0|2|3|10	0	-75.27	0.25	0.7
CG18747	CG8448	FBgn0034091	mrj	4|3	7	3.5	2	0|0|0|6|4|2|0|4|5|3|0	0	-14.36	0.7	0.59
CG18747	CG4153	FBgn0004926	eIF2beta	4|0	4	2	2	0|0|0|4|4|0|3|0|0|0|2	0	-15.84	0.55	0.53
CG18747	CG8764	FBgn0011227	ox	2|1	3	1.5	2	0|0|0|0|0|1|0|1|1|2|0	0.03	-4.17	1.12	0.4
CG18747	CG3008	FBgn0031643	CG3008	3|0	3	1.5	2	0|0|0|8|7|0|0|0|3|2|0	0	-26.07	0.25	0.63
CG18747	CG43119	FBgn0262579	Ect4	20|10	30	15	2	6|3|11|5|4|0|5|0|2|2|2	0.27	-12.25	2.05	0.3
CG18747	CG10149	FBgn0028689	Rpn6	4|0	4	2	2	7|0|2|5|4|2|3|2|0|0|3	0	-23.13	0.38	0.6
CG18747	CG12750	FBgn0086707	ncm	2|0	2	1	2	0|0|0|0|0|0|3|0|0|0|0	0.13	-3.93	1	0.35
CG18747	CG3024	FBgn0025615	Torsin	2|1	3	1.5	2	0|0|0|2|2|0|0|0|2|2|0	0	-6.47	0.75	0.46
CG18747	CG1258	FBgn0011692	pav	30|18	48	24	2	26|5|21|2|0|0|10|5|3|2|3	0	-41.22	1.26	0.65
CG18747	CG43443	FBgn0263391	hts	111|31	142	71	2	23|5|78|19|15|2|58|0|8|9|15	0	-146.33	1.34	0.68
CG18747	CG12532	FBgn0010380	AP-1-2beta	7|3	10	5	2	0|0|3|4|7|0|4|0|0|0|3	0	-14.36	1	0.54
CG18747	CG43665	FBgn0263740	eIF2gamma	3|3	6	3	2	6|0|9|15|13|6|16|8|4|1|9	0	-54.14	0.2	0.7
CG18747	CG7627	FBgn0032026	CG7627	7|5	12	6	2	0|0|0|0|0|0|3|0|0|0|0	0.84	1.24	6	0.02
CG18747	CG6143	FBgn0004401	Pep	8|4	12	6	2	9|1|8|21|21|0|72|2|2|0|14	0	-150.68	0.16	0.7
CG18747	CG7622	FBgn0002579	RpL36	1|2	3	1.5	2	0|0|0|5|4|1|8|1|0|0|2	0	-21.47	0.26	0.63
CG18747	CG5094	FBgn0032640	Sgt	4|3	7	3.5	2	0|1|3|2|3|0|4|0|0|0|4	0	-9.49	0.95	0.53
CG18747	CG9446	FBgn0265935	coro	10|7	17	8.5	2	4|0|10|7|4|0|8|0|1|1|3	0	-20.15	1.02	0.61
CG18747	CG4033	FBgn0003278	RpI135	4|4	8	4	2	4|0|4|39|31|7|9|2|2|5|10	0	-101.8	0.15	0.7
CG18747	CG33332	FBgn0067629	CG33332	1|1	2	1	2	0|0|0|0|0|0|0|0|0|0|0	0	1.17	10	0.7
CG18747	CG4035	FBgn0015218	eIF4E1	3|0	3	1.5	2	7|0|5|12|9|2|7|0|2|3|5	0	-40.85	0.16	0.7
CG18747	CG1965	FBgn0037466	CG1965	3|3	6	3	2	0|0|0|1|2|0|4|0|0|3|0	0	-7.12	1	0.5
CG18747	CG5252	FBgn0037894	Ranbp9	6|5	11	5.5	2	2|1|3|4|2|0|0|0|0|3|0	0.01	-5.42	1.65	0.43
CG18747	CG31196	FBgn0020238	14-3-3epsilon	5|6	11	5.5	2	6|0|8|19|18|0|20|0|2|0|13	0	-67	0.29	0.7
CG18747	CG8615	FBgn0035753	RpL18	3|0	3	1.5	2	0|0|6|11|11|2|10|0|0|0|7	0	-46.78	0.14	0.7
CG18747	CG8900	FBgn0010411	RpS18	9|10	19	9.5	2	28|2|17|15|11|36|13|8|14|11|11	0	-89.75	0.35	0.7
CG18747	CG5915	FBgn0015795	Rab7	4|2	6	3	2	0|0|0|4|2|0|4|0|0|0|0	0	-9.84	0.9	0.51
CG18747	CG10504	FBgn0028427	Ilk	2|0	2	1	2	0|0|0|3|4|0|0|0|0|0|4	0	-15.84	0.27	0.58
CG18747	CG6684	FBgn0086472	RpS25	4|3	7	3.5	2	7|0|5|6|3|0|9|0|2|2|6	0	-23.55	0.48	0.64
CG18747	CG12244	FBgn0261524	lic	1|2	3	1.5	2	2|0|2|0|0|0|0|0|0|2|0	0	-6.47	0.75	0.46
CG18747	CG6686	FBgn0032388	CG6686	4|3	7	3.5	2	0|0|0|1|1|4|7|2|0|0|2	0	-11.81	0.81	0.57
CG18747	CG1417	FBgn0003423	slgA	2|3	5	2.5	2	0|0|0|2|0|0|4|0|4|3|0	0	-11.12	0.68	0.55
CG18747	CG42641	FBgn0261396	Rpn3	6|2	8	4	2	4|0|2|12|7|0|7|0|2|0|5	0	-31.45	0.46	0.65
CG18747	CG5525	FBgn0032444	CCT4	6|2	8	4	2	6|3|8|6|7|2|12|0|0|0|12	0	-39.93	0.38	0.66
CG18747	CG1412	FBgn0031118	RhoGAP19D	3|0	3	1.5	2	0|0|0|0|0|0|0|0|0|0|0	0.5	-1.34	15	0.12
CG18747	CG34407	FBgn0085436	Not1	4|0	4	2	2	0|0|0|0|0|0|0|0|0|0|0	0.5	-1.34	20	0.1
CG18747	CG33979	FBgn0261458	capt	3|1	4	2	2	0|0|7|19|16|0|20|0|0|0|8	0	-76.69	0.11	0.7
CG18747	CG11228	FBgn0261456	hpo	6|4	10	5	2	4|0|5|3|4|3|0|1|3|1|2	0	-10.37	1.15	0.52
CG18747	CG44128	FBgn0264959	Src42A	3|0	3	1.5	2	0|0|3|0|0|0|0|0|0|0|0	0.25	-3.93	1.5	0.3
CG18747	CG43365	FBgn0263108	BtbVII	4|3	7	3.5	2	25|3|31|0|0|0|2|0|0|0|0	0	-74.54	0.18	0.7
CG18747	CG10652	FBgn0086710	RpL30	1|1	2	1	2	2|0|3|2|7|1|10|1|1|1|2	0	-25.55	0.15	0.7
CG18747	CG6045	FBgn0038349	AOX3	4|2	6	3	2	0|0|0|0|0|0|2|0|0|0|0	0.64	-0.16	4.5	0.04
CG18747	CG1403	FBgn0011710	2018-09-01	2|0	2	1	2	0|0|0|3|4|0|3|0|0|0|3	0	-14.37	0.3	0.56
CG18747	CG16944	FBgn0003360	sesB	27|24	51	25.5	2	24|4|25|33|34|26|19|28|33|25|19	0	-84.77	0.76	0.69
CG18747	CG8885	FBgn0262467	Scox	1|1	2	1	2	0|0|0|3|4|2|2|3|3|0|1	0	-11.77	0.3	0.7
CG18747	CG6509	FBgn0032363	Dlg5	31|19	50	25	2	6|0|15|27|32|1|11|1|8|8|10	0	-60.37	1.01	0.68
CG18747	CG8340	FBgn0010339	128up	2|1	3	1.5	2	0|0|0|7|0|0|3|0|0|0|1	0	-12.86	0.41	0.57
CG18747	CG8222	FBgn0032006	Pvr	8|2	10	5	2	0|0|0|0|0|0|0|0|0|0|0	0.98	3.2	50	0
CG18747	CG15098	FBgn0034398	CG15098	2|2	4	2	2	0|0|0|2|2|0|4|0|0|0|0	0	-7.42	0.75	0.5
CG18747	CG3689	FBgn0035987	CG3689	1|1	2	1	2	0|0|0|0|0|0|0|0|0|0|0	0	1.17	10	0.7
CG18747	CG5000	FBgn0027948	msps	2|2	4	2	2	0|0|0|3|2|0|4|0|0|0|3	0	-9.84	0.6	0.55
CG18747	CG5004	FBgn0260748	CG5004	2|0	2	1	2	0|0|0|3|3|0|0|0|0|0|0	0	-8.47	0.5	0.46
CG18747	CG13890	FBgn0035169	CG13890	2|0	2	1	2	0|0|0|3|0|0|3|0|0|2|0	0	-11.52	0.38	0.52
CG18747	CG4087	FBgn0002593	RpLP1	5|3	8	4	2	5|1|6|6|2|5|12|1|3|2|3	0	-26.13	0.5	0.64
CG18747	CG42496	FBgn0260222	CG42496	0|4	4	2	2	0|0|0|0|0|0|0|0|0|0|0	0.5	-1.34	20	0.1
CG18747	CG6957	FBgn0031717	Oscillin	2|0	2	1	2	0|0|0|0|0|0|0|0|0|0|0	0.48	-1.34	10	0.17
CG18747	CG6958	FBgn0039004	Nup133	2|1	3	1.5	2	0|0|0|10|7|0|3|0|0|0|0	0	-25.55	0.22	0.65
CG18747	CG7434	FBgn0015288	RpL22	2|1	3	1.5	2	6|0|7|7|8|3|13|1|2|0|8	0	-38.66	0.16	0.7
CG18747	CG6815	FBgn0040237	bor	27|23	50	25	2	32|1|24|39|32|31|28|10|33|24|17	0	-91.62	0.72	0.69
CG18747	CG11665	FBgn0033028	CG11665	5|3	8	4	2	0|0|0|0|0|0|0|0|0|0|0	1	5.04	40	0
CG18747	CG11999	FBgn0037312	CG11999	4|3	7	3.5	2	7|1|5|49|55|8|23|6|4|7|17	0	-174.07	0.08	0.7
CG18747	CG1483	FBgn0002645	Map205	18|9	27	13.5	2	2|0|10|15|13|0|25|0|0|0|13	0	-51.95	0.76	0.67
CG18747	CG6341	FBgn0028737	eEF1beta	3|3	6	3	2	7|1|8|11|11|2|12|0|3|0|9	0	-40.03	0.26	0.7
CG18747	CG1486	FBgn0031174	CG1486	0|2	2	1	2	0|0|0|0|2|0|3|0|0|0|2	0	-10.06	0.43	0.49
CG18747	CG1484	FBgn0000709	fliI	2|0	2	1	2	0|0|0|0|0|0|0|0|0|0|0	0.48	-1.34	10	0.17
CG18747	CG1489	FBgn0020369	Rpt6	6|8	14	7	2	6|1|7|10|11|5|10|5|5|4|10	0	-29.37	0.68	0.65
CG18747	CG6593	FBgn0003134	Pp1alpha-96A	4|2	6	3	2	0|0|0|0|0|0|0|0|0|0|0	0.98	3.2	30	0
CG18747	CG6264	FBgn0040238	Best1	3|0	3	1.5	2	0|0|0|0|0|0|0|0|0|0|0	0.5	-1.34	15	0.12
CG18747	CG9282	FBgn0032518	RpL24	1|1	2	1	2	3|0|1|7|7|2|7|1|2|2|2	0	-27.12	0.14	0.7
CG18747	CG9128	FBgn0283500	Sac1	2|0	2	1	2	0|0|0|0|0|0|1|0|0|0|4	0.02	-7.1	0.6	0.42
CG18747	CG32165	FBgn0042178	CG32165	2|0	2	1	2	0|0|0|2|1|0|0|0|0|0|0	0.09	-4.37	1	0.36
CG18747	CG1345	FBgn0039580	Gfat2	5|5	10	5	2	1|2|5|17|14|3|10|2|3|4|8	0	-44.82	0.37	0.7
CG18747	CG17947	FBgn0010215	alpha-Cat	6|0	6	3	2	0|0|0|0|0|0|0|0|0|0|0	0.5	-1.34	30	0.09
CG18747	CG11522	FBgn0039857	RpL6	1|1	2	1	2	1|0|4|12|12|0|13|0|2|0|4	0	-50.29	0.08	0.7
CG18747	CG32528	FBgn0052528	parvin	2|1	3	1.5	2	0|0|0|7|6|0|3|0|0|0|1	0	-20.05	0.28	0.62
CG18747	CG7948	FBgn0003479	spn-A	0|3	3	1.5	2	0|0|0|0|0|0|0|0|0|0|0	0.5	-1.34	15	0.12
CG18747	CG18319	FBgn0000173	ben	0|3	3	1.5	2	7|0|4|1|3|5|0|2|4|2|0	0	-23.13	0.28	0.61
CG18747	CG3204	FBgn0283666	Rap2l	1|2	3	1.5	2	0|0|0|0|0|0|0|0|0|0|0	0.48	1.17	15	0.17
CG18747	CG3201	FBgn0004687	Mlc-c	6|5	11	5.5	2	10|0|7|1|3|2|8|2|2|1|6	0	-23.52	0.66	0.64
CG18747	CG5174	FBgn0034345	CG5174	9|4	13	6.5	2	5|1|8|1|4|1|8|3|0|0|5	0	-20.21	0.93	0.59
CG18747	CG3209	FBgn0034971	CG3209	3|1	4	2	2	0|0|0|0|0|0|0|0|0|2|0	0.34	-1.46	3	0.29
CG18747	CG3431	FBgn0011327	Uch-L5	2|0	2	1	2	0|0|0|2|5|0|3|0|0|0|0	0	-14.37	0.3	0.56
CG18747	CG45786	FBgn0267433	kl-5	2|0	2	1	2	0|0|0|0|0|0|2|0|0|0|0	0.23	-3.51	1.5	0.31
CG18747	CG18259	FBgn0030956	CG18259	5|5	10	5	2	3|1|6|0|0|7|20|5|5|7|18	0	-49.81	0.33	0.7
CG18747	CG30497	FBgn0050497	CG30497	2|0	2	1	2	0|0|0|0|0|0|0|0|0|0|0	0.48	-1.34	10	0.17
CG18747	CG1666	FBgn0001565	Hlc	2|2	4	2	2	2|1|2|13|8|3|2|1|0|0|2	0	-28.16	0.25	0.7
CG18747	CG3164	FBgn0025683	CG3164	8|8	16	8	2	2|0|3|7|4|4|1|3|2|2|2	0	-7	1.6	0.5
CG18747	CG10315	FBgn0034858	eIF2Bdelta	3|0	3	1.5	2	0|0|0|1|2|0|0|0|0|0|2	0.04	-7.29	0.9	0.39
CG18747	CG11963	FBgn0037643	skap	3|3	6	3	2	8|0|5|7|7|7|7|2|4|4|5	0	-23.55	0.41	0.7
CG18747	CG15112	FBgn0000578	ena	28|19	47	23.5	2	54|6|79|8|6|6|12|6|6|4|8	0	-152.87	0.49	0.69
CG18747	CG31022	FBgn0039776	PH4alphaEFB	1|1	2	1	2	0|0|0|2|3|2|0|2|2|3|0	0	-9.13	0.38	0.7
CG18747	CG8156	FBgn0013750	Arf51F	2|0	2	1	2	0|0|0|0|0|0|0|0|0|0|0	0.48	-1.34	10	0.17
CG18747	CG10622	FBgn0029118	Sucb	0|4	4	2	2	5|3|5|5|8|4|11|4|4|6|4	0	-36.4	0.24	0.7
CG18747	CG4199	FBgn0025628	CG4199	2|1	3	1.5	2	0|0|0|4|5|0|4|0|0|0|3	0	-15.87	0.35	0.6
CG18747	CG8409	FBgn0003607	Su(var)205	2|0	2	1	2	0|0|0|4|3|0|75|0|0|0|4	0	-120.88	0.04	0.7
CG18747	CG5972	FBgn0284255	Arpc4	4|2	6	3	2	2|1|2|0|0|0|3|0|2|1|3	0.01	-7.42	1.12	0.45
CG18747	CG10105	FBgn0033935	Sin1	2|0	2	1	2	0|0|0|12|16|0|2|0|0|0|5	0	-47.84	0.09	0.7
CG18747	CG4618	FBgn0035589	CHMP2B	5|3	8	4	2	8|1|7|0|0|0|3|0|0|0|1	0	-18.26	0.67	0.61
CG18747	CG3061	FBgn0038195	CG3061	1|3	4	2	2	4|0|3|2|3|3|0|0|0|0|0	0	-11.77	0.6	0.54
CG18747	CG10103	FBgn0035715	CG10103	4|1	5	2.5	2	10|0|7|0|2|0|2|0|0|0|0	0	-23.94	0.39	0.62
CG18747	CG2168	FBgn0017545	RpS3A	13|7	20	10	2	22|2|17|32|35|31|30|26|15|5|23	0	-119.48	0.31	0.7
CG18747	CG7885	FBgn0026373	RpII33	3|1	4	2	2	0|0|0|2|2|0|0|0|0|0|0	0.1	-4.24	1.5	0.36
CG18747	CG7283	FBgn0036213	RpL10Ab	4|3	7	3.5	2	6|1|7|8|9|4|16|3|4|3|8	0	-38.45	0.32	0.7
CG18747	CG3664	FBgn0014010	Rab5	1|2	3	1.5	2	0|0|0|3|2|1|3|1|0|0|1	0	-9.13	0.56	0.52
CG18747	CG17492	FBgn0086442	mib2	2|2	4	2	2	0|0|0|0|0|0|0|0|0|0|0	0.96	3.2	20	0.01
CG18747	CG4119	FBgn0028474	CG4119	12|13	25	12.5	2	2|0|3|15|13|14|10|15|10|10|8	0	-35.34	0.85	0.67
CG18747	CG5214	FBgn0037891	CG5214	17|12	29	14.5	2	8|1|6|3|6|0|9|2|2|2|4	0.01	-10.65	1.89	0.44
CG18747	CG15894	FBgn0029864	CG15894	0|2	2	1	2	0|0|0|0|0|0|0|0|0|0|0	0.48	-1.34	10	0.17
CG18747	CG5504	FBgn0002174	l(2)tid	19|17	36	18	2	9|2|12|51|46|24|20|17|10|27|19	0	-129.75	0.44	0.7
CG18746	CG11793	FBgn0003462	Sod1	4|1	5	2.5	2	0|1|3|5|4|0|6|0|0|0|5	0	-20.05	0.47	0.6
CG18746	CG9393	FBgn0037710	CG9393	2|4	6	3	2	0|0|0|0|0|0|0|0|0|0|0	0.98	3.2	30	0
CG18746	CG1826	FBgn0030228	BTBD9	2|0	2	1	2	0|0|0|0|0|0|0|0|0|0|0	0.48	-1.34	10	0.17
CG18746	CG40042	FBgn0267976	Tim23	5|6	11	5.5	2	0|0|0|3|3|3|0|0|0|0|0	0.03	-4.27	1.83	0.4
CG18746	CG5214	FBgn0037891	CG5214	3|3	6	3	2	8|1|6|3|6|0|9|2|2|2|4	0	-24.91	0.39	0.7
CG18746	CG34438	FBgn0259876	Cap-G	4|4	8	4	2	0|0|0|0|0|0|0|0|0|0|0	1	6.79	40	0
CG18746	CG12165	FBgn0260991	Incenp	2|0	2	1	2	0|0|0|0|0|0|16|0|0|0|0	0	-21.9	0.19	0.62
CG18746	CG6090	FBgn0039406	RpL34a	2|5	7	3.5	2	0|0|0|0|0|0|1|0|0|0|1	0.69	-0.38	5.25	0.03
CG18746	CG9012	FBgn0000319	Chc	6|8	14	7	2	5|5|17|34|24|0|26|0|0|2|11	0	-102.42	0.25	0.7
CG18746	CG6095	FBgn0266668	Exo84	4|0	4	2	2	0|0|0|0|0|0|0|0|0|0|0	0.5	-1.34	20	0.1
CG18746	CG30404	FBgn0050404	Tango11	3|0	3	1.5	2	0|0|0|0|0|0|0|0|0|0|0	0.5	-1.34	15	0.12
CG18746	CG13779	FBgn0266666	Sem1	2|0	2	1	2	0|0|0|0|0|0|0|0|0|0|0	0.48	-1.34	10	0.17
CG18746	CG7610	FBgn0020235	ATPsyngamma	12|8	20	10	2	12|1|15|9|8|15|8|12|10|12|6	0	-39.8	0.71	0.67
CG18746	CG11184	FBgn0034923	Upf3	2|2	4	2	2	0|0|0|0|0|0|0|0|0|0|0	0.96	3.2	20	0.01
CG18746	CG17266	FBgn0033089	CG17266	4|9	13	6.5	2	0|0|0|3|0|0|4|0|0|0|0	0.44	-3.19	2.79	0.27
CG18746	CG11092	FBgn0027537	Nup93-1	9|5	14	7	2	8|0|1|3|4|0|6|0|2|2|3	0	-14.78	1.17	0.55
CG18746	CG10540	FBgn0034577	cpa	7|5	12	6	2	10|2|15|7|8|6|15|3|6|4|5	0	-43.45	0.45	0.7
CG18746	CG10811	FBgn0023213	eIF4G1	42|36	78	39	2	14|5|19|70|75|11|36|7|14|20|30	0	-165.63	0.65	0.69
CG18746	CG10754	FBgn0036314	Sf3a2	1|6	7	3.5	2	0|0|0|0|0|0|0|0|0|0|0	0.5	1.17	35	0.09
CG18746	CG3949	FBgn0015393	hoip	11|12	23	11.5	2	3|0|2|4|3|2|50|2|2|1|3	0	-51.81	0.61	0.68
CG18746	CG4183	FBgn0001225	Hsp26	2|2	4	2	2	1|0|3|0|0|0|2|0|0|0|2	0	-6.23	0.86	0.48
CG18746	CG17320	FBgn0015808	ScpX	2|0	2	1	2	0|0|0|0|0|0|2|0|0|0|1	0.09	-4.37	1	0.36
CG18746	CG12363	FBgn0024432	Dlc90F	1|2	3	1.5	2	17|0|16|0|0|0|6|0|0|0|2	0	-52.78	0.12	0.7
CG18746	CG2207	FBgn0022893	Df31	0|4	4	2	2	3|1|23|50|41|0|66|10|4|0|39	0	-233.03	0.04	0.7
CG18746	CG5562	FBgn0024234	gbb	1|1	2	1	2	0|0|0|1|1|0|0|0|0|0|0	0	-1.77	1.5	0.7
CG18746	CG15747	FBgn0030474	CG15747	9|15	24	12	2	0|0|0|0|0|0|7|0|0|0|0	0.84	1.1	5.14	0.02
CG18746	CG7144	FBgn0025687	LKRSDH	5|8	13	6.5	2	0|0|6|16|12|3|10|4|0|3|6	0	-40.73	0.51	0.67
CG18746	CG8711	FBgn0033260	Cul4	1|4	5	2.5	2	0|0|0|2|1|0|0|0|0|0|0	0.37	-2.97	2.5	0.28
CG18746	CG9715	FBgn0036668	Zcchc7	2|0	2	1	2	0|0|0|0|0|0|0|0|0|0|0	0.48	-1.34	10	0.17
CG18746	CG17064	FBgn0033845	mars	2|0	2	1	2	0|0|0|0|0|0|9|0|0|0|0	0	-11.89	0.33	0.52
CG18746	CG8715	FBgn0020279	lig	2|2	4	2	2	2|0|11|11|13|1|13|1|0|0|6	0	-47.06	0.16	0.7
CG18746	CG33104	FBgn0069242	eca	1|1	2	1	2	0|0|0|0|0|0|0|0|0|0|0	0	1.17	10	0.7
CG18746	CG9006	FBgn0086712	Egm	0|2	2	1	2	0|1|2|7|7|0|5|0|0|0|3	0	-27.54	0.16	0.7
CG18746	CG5815	FBgn0027574	CG5815	2|0	2	1	2	0|0|0|0|0|0|4|0|0|0|0	0.06	-5.41	0.75	0.38
CG18746	CG10465	FBgn0033017	CG10465	4|8	12	6	2	0|0|0|0|0|0|0|0|0|0|0	1	6.79	60	0
CG18746	CG33180	FBgn0053180	Ranbp16	0|2	2	1	2	0|0|0|2|0|0|0|0|0|0|0	0.23	-3.51	1.5	0.31
CG18746	CG9493	FBgn0031799	Pez	2|0	2	1	2	0|0|0|4|7|0|2|0|0|0|0	0	-18.66	0.23	0.6
CG18746	CG9372	FBgn0036891	CG9372	2|3	5	2.5	2	1|0|2|6|7|0|2|0|2|1|3	0	-17.66	0.47	0.61
CG18746	CG1666	FBgn0001565	Hlc	12|14	26	13	2	2|1|2|13|8|3|2|1|0|0|2	0	-11.62	1.62	0.55
CG18746	CG10212	FBgn0027783	SMC2	2|0	2	1	2	0|0|0|0|0|0|0|0|0|0|0	0.48	-1.34	10	0.17
CG18746	CG6169	FBgn0036534	DCP2	1|3	4	2	2	0|0|0|0|0|0|0|0|0|0|0	0.5	1.17	20	0.12
CG18746	CG5352	FBgn0262601	SmB	7|11	18	9	2	6|0|2|4|5|3|14|0|2|0|2	0	-19.73	1.08	0.6
CG18746	CG9304	FBgn0034674	CG9304	2|0	2	1	2	0|0|0|0|0|0|0|0|0|0|0	0.48	-1.34	10	0.17
CG18746	CG3455	FBgn0028685	Rpt4	2|0	2	1	2	6|2|2|3|4|1|5|1|0|0|3	0	-21.63	0.2	0.7
CG18746	CG7065	FBgn0030091	CG7065	2|0	2	1	2	0|0|0|2|0|0|0|0|0|0|0	0.23	-3.51	1.5	0.31
CG18746	CG7424	FBgn0031980	RpL36A	2|3	5	2.5	2	0|0|0|2|3|0|2|0|0|0|1	0.01	-6.23	1.07	0.45
CG18746	CG12244	FBgn0261524	lic	0|3	3	1.5	2	2|0|2|0|0|0|0|0|0|2|0	0.01	-8.57	0.75	0.42
CG18746	CG12262	FBgn0035811	CG12262	4|8	12	6	2	11|0|10|7|7|6|6|7|8|6|4	0	-30.79	0.62	0.65
CG18746	CG16865	FBgn0028919	CG16865	3|3	6	3	2	0|0|0|0|0|3|4|0|1|1|0	0	-5.94	1.12	0.47
CG18746	CG8309	FBgn0033902	eIF3m	5|8	13	6.5	2	2|0|2|8|8|2|4|3|1|2|4	0	-17.24	0.97	0.59
CG18746	CG12261	FBgn0039555	mRpS22	3|6	9	4.5	2	0|0|0|3|0|0|0|0|0|0|0	0.68	0.03	4.5	0.04
CG18746	CG14048	FBgn0040389	mRpL14	3|2	5	2.5	2	3|0|4|5|2|3|4|3|2|0|4	0	-13.68	0.58	0.58
CG18746	CG12264	FBgn0032393	CG12264	22|17	39	19.5	2	11|0|5|20|16|23|7|5|10|10|5	0	-45.66	0.99	0.67
CG18746	CG6782	FBgn0037912	sea	4|4	8	4	2	3|0|2|5|5|2|0|2|5|4|0	0	-12.71	0.8	0.59
CG18746	CG16903	FBgn0040394	CG16903	3|9	12	6	2	0|0|0|0|2|0|0|0|0|0|0	0.83	0.71	9	0.02
CG18746	CG14513	FBgn0005596	yem	0|3	3	1.5	2	0|0|0|0|0|0|0|0|0|0|0	0.5	-1.34	15	0.12
CG18746	CG16901	FBgn0263396	sqd	7|14	21	10.5	2	2|0|7|7|4|0|8|0|2|2|5	0	-16.59	1.43	0.51
CG18746	CG6621	FBgn0037855	CG6621	3|8	11	5.5	2	0|0|0|0|0|0|0|0|0|0|0	1	5.04	55	0
CG18746	CG33908	FBgn0053908	His2B:CG33908	1|1	2	1	2	0|0|0|0|0|0|3|0|0|0|0	0	-2.53	1	0.7
CG18746	CG6418	FBgn0036104	CG6418	0|3	3	1.5	2	0|0|0|0|3|0|0|0|0|0|0	0.25	-3.93	1.5	0.3
CG18746	CG3401	FBgn0003888	betaTub60D	72|37	109	54.5	2	64|0|87|80|55|74|52|34|20|22|9	0	-243.99	0.68	0.69
CG18746	CG4360	FBgn0038787	CG4360	2|0	2	1	2	0|0|0|2|3|0|5|0|0|0|0	0	-14.37	0.3	0.56
CG18746	CG7128	FBgn0022724	Taf8	1|1	2	1	2	0|0|0|0|0|0|0|0|0|0|0	0	1.17	10	0.7
CG18746	CG1433	FBgn0019637	Atu	3|2	5	2.5	2	0|0|0|2|3|0|1|0|0|0|1	0.02	-5.04	1.25	0.42
CG18746	CG4364	FBgn0032138	CG4364	3|3	6	3	2	0|0|0|0|0|0|2|0|0|0|0	0.67	0.71	4.5	0.04
CG18746	CG8367	FBgn0000289	cg	5|2	7	3.5	2	0|0|0|3|4|0|4|0|0|0|4	0	-12.34	0.88	0.52
CG18746	CG9086	FBgn0030809	Ubr1	4|3	7	3.5	2	0|0|0|6|1|0|2|0|0|0|0	0	-6.8	1.17	0.47
CG18746	CG5836	FBgn0025571	SF1	0|8	8	4	2	0|0|0|0|0|0|0|0|0|0|0	0.5	-1.34	40	0.08
CG18746	CG18591	FBgn0261790	SmE	3|6	9	4.5	2	0|0|0|0|2|2|4|0|2|0|2	0.07	-5.94	1.69	0.37
CG18746	CG13850	FBgn0038961	CG13850	0|2	2	1	2	0|0|0|0|0|0|2|0|0|0|0	0.23	-3.51	1.5	0.31
CG18746	CG5589	FBgn0036754	CG5589	3|3	6	3	2	0|0|0|0|0|0|0|0|0|0|0	0.99	5.04	30	0
CG18746	CG31716	FBgn0051716	Cnot4	3|0	3	1.5	2	0|0|0|0|0|0|0|0|0|0|0	0.5	-1.34	15	0.12
CG18746	CG42616	FBgn0261268	Cul3	5|2	7	3.5	2	0|0|0|0|0|0|0|0|0|0|0	0.98	3.2	35	0
CG18746	CG9155	FBgn0010246	Myo61F	2|0	2	1	2	1|0|2|2|2|0|3|0|0|0|2	0	-10.06	0.43	0.49
CG18746	CG1444	FBgn0029975	spidey	7|7	14	7	2	4|0|5|2|0|4|3|2|2|4|3	0	-6.09	1.62	0.47
CG18746	CG1528	FBgn0028968	gammaCOP	7|6	13	6.5	2	4|0|2|7|6|0|3|0|4|3|2	0	-12.16	1.15	0.57
CG18746	CG13390	FBgn0032031	CG13390	3|2	5	2.5	2	0|0|0|9|8|0|3|0|0|0|2	0	-23.01	0.38	0.64
CG18746	CG13392	FBgn0032033	CG13392	1|3	4	2	2	0|0|0|0|0|2|0|2|0|0|0	0.1	-4.24	1.5	0.36
CG18746	CG1524	FBgn0004403	RpS14a	13|15	28	14	2	9|0|7|13|13|13|10|9|10|8|7	0	-27.86	1.08	0.65
CG18746	CG1527	FBgn0004404	RpS14b	13|15	28	14	2	9|0|7|13|13|13|10|9|10|8|7	0	-27.86	1.08	0.65
CG18746	CG31729	FBgn0051729	CG31729	4|4	8	4	2	0|0|3|2|0|0|2|0|0|0|0	0.03	-3.35	1.71	0.4
CG18746	CG4046	FBgn0034743	RpS16	13|15	28	14	2	14|0|14|13|16|20|14|10|15|9|12	0	-42.3	0.82	0.67
CG18746	CG8978	FBgn0001961	Arpc1	4|0	4	2	2	3|2|6|2|2|3|3|2|0|0|0	0	-17.24	0.5	0.55
CG18746	CG2331	FBgn0261014	TER94	6|9	15	7.5	2	10|0|14|39|33|3|34|4|3|1|20	0	-133.92	0.21	0.7
CG18746	CG9401	FBgn0002736	mago	4|14	18	9	2	0|0|0|0|0|0|0|0|0|0|0	1	6.79	90	0
CG18746	CG9053	FBgn0264389	opm	2|1	3	1.5	2	0|0|0|0|0|0|0|0|0|0|0	0.48	1.17	15	0.17
CG18746	CG5887	FBgn0086687	Desat1	2|0	2	1	2	0|0|0|0|0|0|0|0|0|0|0	0.48	-1.34	10	0.17
CG18746	CG13848	FBgn0038966	pinta	3|1	4	2	2	0|0|0|0|0|0|0|0|0|2|0	0.34	-1.46	3	0.29
CG18746	CG5885	FBgn0025700	CG5885	1|1	2	1	2	0|0|0|0|2|0|1|0|1|1|1	0	-4.17	0.75	0.7
CG18746	CG6692	FBgn0013770	Cp1	4|5	9	4.5	2	6|0|8|9|7|6|6|6|3|3|3	0	-24.12	0.56	0.7
CG18746	CG4528	FBgn0003449	snf	3|6	9	4.5	2	0|0|0|0|0|0|7|0|0|0|1	0.09	-5.16	1.69	0.37
CG18746	CG17952	FBgn0034657	LBR	1|2	3	1.5	2	0|0|0|0|0|0|6|0|0|0|0	0.01	-5.68	0.75	0.44
CG18746	CG11183	FBgn0034921	DCP1	1|2	3	1.5	2	0|0|0|1|2|0|0|0|0|0|2	0.01	-5.37	0.9	0.43
CG18746	CG10923	FBgn0004379	Klp67A	5|13	18	9	2	0|0|0|0|0|0|0|0|0|0|0	1	8.47	90	0
CG18746	CG6598	FBgn0011768	Fdh	2|0	2	1	2	0|0|3|3|3|0|2|0|0|0|0	0	-12.88	0.33	0.54
CG18746	CG8274	FBgn0013756	Mtor	18|16	34	17	2	6|1|12|95|90|6|42|4|4|0|31	0	-276.11	0.22	0.7
CG18746	CG11180	FBgn0034528	CG11180	16|14	30	15	2	0|0|0|0|0|0|15|0|0|0|0	0.38	-1.03	3	0.28
CG18746	CG6439	FBgn0038922	Idh3b	5|8	13	6.5	2	0|0|0|3|1|0|0|0|0|0|3	0.49	-2	2.79	0.17
CG18746	CG17611	FBgn0034915	eIF6	6|10	16	8	2	0|0|0|0|2|0|11|0|0|0|0	0.04	-6.57	1.85	0.39
CG18746	CG4429	FBgn0262734	eIF4H1	1|3	4	2	2	1|0|4|5|2|1|8|1|0|0|5	0	-22.85	0.33	0.63
CG18746	CG8571	FBgn0016983	smid	4|0	4	2	2	0|0|0|9|11|2|4|1|0|0|0	0	-34.77	0.25	0.65
CG18746	CG33882	FBgn0053882	His2B:CG33882	1|1	2	1	2	0|0|0|0|0|0|3|0|0|0|0	0	-2.53	1	0.7
CG18746	CG10192	FBgn0260634	eIF4G2	4|8	12	6	2	0|0|0|1|2|0|2|0|0|0|0	0.61	-1.1	3.6	0.05
CG18746	CG4414	FBgn0040091	Ugt58Fa	3|1	4	2	2	0|1|2|9|3|0|1|0|1|3|1	0	-18.29	0.4	0.6
CG18746	CG17768	FBgn0032240	CG17768	0|2	2	1	2	0|0|0|0|0|0|6|0|0|0|2	0	-11.14	0.38	0.51
CG18746	CG5602	FBgn0262619	DNA-ligI	1|2	3	1.5	2	0|0|3|3|4|0|0|0|0|0|0	0	-11.77	0.45	0.56
CG18746	CG2931	FBgn0037342	CG2931	0|5	5	2.5	2	0|0|0|0|0|0|6|0|0|0|4	0	-14	0.75	0.46
CG18746	CG18178	FBgn0036035	CG18178	8|10	18	9	2	0|0|0|0|0|0|27|0|0|0|3	0	-23.19	0.9	0.64
CG18746	CG10077	FBgn0035720	CG10077	14|13	27	13.5	2	0|0|4|20|23|0|17|0|0|0|5	0	-53.64	0.68	0.68
CG18746	CG10071	FBgn0016726	RpL29	2|2	4	2	2	0|0|0|1|1|0|5|0|0|0|0	0	-5.97	0.86	0.47
CG18746	CG8370	FBgn0034060	CG8370	4|2	6	3	2	0|0|0|0|0|0|0|0|0|0|0	0.98	3.2	30	0
CG18746	CG4799	FBgn0267727	Pen	5|4	9	4.5	2	6|0|3|14|10|3|4|2|0|0|6	0	-31.99	0.45	0.66
CG18746	CG1836	FBgn0026777	Rad23	0|2	2	1	2	12|5|13|3|4|0|8|0|0|0|3	0	-48.25	0.09	0.7
CG18746	CG3249	FBgn0263987	spoon	7|5	12	6	2	0|0|0|0|0|0|0|0|0|0|0	1	8.47	60	0
CG18746	CG6866	FBgn0032515	loqs	1|1	2	1	2	0|0|0|0|0|0|0|0|0|0|0	0	1.17	10	0.7
CG18746	CG7057	FBgn0263351	AP-2mu	0|3	3	1.5	2	0|0|0|0|2|0|0|0|0|0|0	0.34	-3.51	2.25	0.29
CG18746	CG17246	FBgn0261439	SdhA	5|10	15	7.5	2	1|0|4|22|16|3|6|1|2|5|4	0	-48.32	0.51	0.67
CG18746	CG1782	FBgn0023143	Uba1	2|2	4	2	2	2|3|12|34|20|0|24|0|0|0|12	0	-106.45	0.08	0.7
CG18746	CG1783	FBgn0024728	Slip1	1|1	2	1	2	0|0|0|0|0|0|0|0|0|0|0	0	1.17	10	0.7
CG18746	CG4211	FBgn0004227	nonA	4|6	10	5	2	0|0|0|24|14|0|7|0|0|4|8	0	-53.61	0.33	0.68
CG18746	CG1785	FBgn0030061	CG1785	8|6	14	7	2	0|0|0|0|0|0|7|0|0|0|0	0.51	-0.6	3	0.08
CG18746	CG12189	FBgn0035150	Rev1	4|0	4	2	2	0|0|0|0|0|0|0|0|0|0|0	0.5	-1.34	20	0.1
CG18746	CG10944	FBgn0261592	RpS6	11|12	23	11.5	2	3|0|5|8|7|4|7|5|2|1|5	0	-10.89	1.57	0.55
CG18746	CG11007	FBgn0034455	CG11007	1|3	4	2	2	0|0|0|0|0|0|2|0|0|0|0	0.34	-1.46	3	0.29
CG18746	CG3416	FBgn0002787	Rpn8	2|2	4	2	2	0|0|0|5|5|0|3|0|0|0|4	0	-15.01	0.43	0.6
CG18746	CG9273	FBgn0032906	RPA2	3|3	6	3	2	53|5|44|2|2|0|5|0|0|0|5	0	-136.82	0.09	0.7
CG18746	CG12819	FBgn0037810	sle	3|1	4	2	2	0|0|0|0|0|0|114|0|0|0|0	0	-161.83	0.05	0.7
CG18746	CG12818	FBgn0037809	CG12818	1|4	5	2.5	2	0|0|0|0|0|0|3|0|0|0|0	0.34	-2.53	2.5	0.29
CG18746	CG1234	FBgn0037489	CG1234	4|5	9	4.5	2	0|0|0|0|0|0|0|0|0|0|0	1	6.79	45	0
CG18746	CG46149	FBgn0267828	Fatp	11|10	21	10.5	2	0|0|0|0|0|0|0|0|12|7|0	0	-8.4	1.66	0.51
CG18746	CG3992	FBgn0003507	srp	0|2	2	1	2	4|0|3|2|2|0|3|0|0|0|3	0	-14.37	0.3	0.56
CG18746	CG7961	FBgn0025725	alphaCOP	26|24	50	25	2	12|1|24|212|167|17|90|6|9|19|74	0	-599.2	0.16	0.7
CG18746	CG8057	FBgn0260972	alc	6|3	9	4.5	2	0|0|0|6|8|2|4|0|5|5|0	0	-19.56	0.71	0.61
CG18746	CG8055	FBgn0086656	shrb	14|16	30	15	2	58|7|32|2|2|0|35|0|2|3|6	0	-138.14	0.36	0.69
CG18746	CG1017	FBgn0035294	Mfap1	0|2	2	1	2	0|0|0|2|4|0|0|0|0|0|0	0	-8.33	0.5	0.46
CG18746	CG4822	FBgn0031220	CG4822	2|3	5	2.5	2	0|0|0|0|0|0|0|0|0|0|0	0.98	3.2	25	0
CG18746	CG1150	FBgn0037411	Osi3	1|1	2	1	2	0|0|0|2|0|0|0|0|0|0|0	0	-1.46	1.5	0.7
CG18746	CG3835	FBgn0023507	D2hgdh	3|2	5	2.5	2	0|0|0|2|4|0|0|0|2|2|0	0	-7.42	0.94	0.48
CG18746	CG3836	FBgn0003459	stwl	20|20	40	20	2	97|11|122|2|3|0|60|0|0|0|5	0	-338.63	0.22	0.7
CG18746	CG15792	FBgn0265434	zip	72|31	103	51.5	2	138|18|165|76|86|16|147|47|5|3|84	0	-551.54	0.34	0.7
CG18746	CG4679	FBgn0033816	CG4679	0|2	2	1	2	0|0|0|4|2|0|2|0|0|0|1	0	-11.52	0.38	0.52
CG18746	CG11417	FBgn0024364	CG11417	4|2	6	3	2	0|0|0|1|1|0|0|0|0|0|2	0.28	-2.68	2.25	0.3
CG18746	CG7845	FBgn0284246	l(2)k09848	3|3	6	3	2	0|0|0|0|0|0|4|0|0|0|0	0.31	-0.78	2.25	0.29
CG18746	CG3265	FBgn0027066	Eb1	4|5	9	4.5	2	1|0|7|15|14|0|16|0|0|0|9	0	-52.81	0.3	0.7
CG18746	CG5651	FBgn0086706	pix	8|3	11	5.5	2	0|0|0|0|0|0|0|0|0|0|0	1	5.04	55	0
CG18746	CG5395	FBgn0005322	nmd	6|4	10	5	2	3|0|2|1|2|2|0|1|1|2|0	0.18	-3.35	2.14	0.33
CG18746	CG14307	FBgn0004652	fru	1|2	3	1.5	2	7|0|4|8|6|0|3|0|0|0|3	0	-27.12	0.21	0.7
CG18746	CG7843	FBgn0033062	Ars2	15|28	43	21.5	2	0|0|0|14|11|0|8|0|0|2|4	0.16	-18	1.95	0.34
CG18746	CG5146	FBgn0035617	l(3)psg2	2|4	6	3	2	0|0|0|0|0|0|0|0|0|0|0	0.98	3.2	30	0
CG18746	CG17183	FBgn0035149	MED30	1|1	2	1	2	1|0|2|1|3|0|1|0|0|0|2	0	-7.81	0.43	0.7
CG18746	CG3333	FBgn0259937	Nop60B	24|24	48	24	2	6|0|3|3|5|0|9|0|3|2|2	1	7.68	3.6	0
CG18746	CG9577	FBgn0031092	CG9577	1|3	4	2	2	0|0|0|1|3|0|0|0|0|0|0	0.12	-4.04	1.5	0.36
CG18746	CG30291	FBgn0050291	CG30291	2|1	3	1.5	2	0|0|0|0|0|0|0|0|0|0|0	0.48	1.17	15	0.17
CG18746	CG15019	FBgn0035541	CG15019	0|3	3	1.5	2	0|0|0|0|0|0|0|0|0|0|0	0.5	-1.34	15	0.12
CG18746	CG6582	FBgn0027885	Aac11	3|2	5	2.5	2	0|0|0|3|3|0|3|0|0|0|0	0	-8.55	0.83	0.51
CG18746	CG8280	FBgn0284245	eEF1alpha1	34|33	67	33.5	2	43|3|44|85|87|53|63|34|23|23|48	0	-244.48	0.43	0.7
CG18746	CG4494	FBgn0264922	smt3	1|4	5	2.5	2	1|0|2|2|2|0|5|0|0|0|6	0	-15.87	0.58	0.57
CG18746	CG17593	FBgn0031544	CG17593	6|4	10	5	2	1|0|2|2|3|0|1|0|2|2|1	0.18	-3.35	2.14	0.33
CG18746	CG3269	FBgn0014009	Rab2	2|2	4	2	2	0|0|0|3|4|0|4|0|0|0|3	0	-11.12	0.55	0.57
CG18746	CG3582	FBgn0017457	U2af38	1|4	5	2.5	2	0|0|0|5|5|0|0|0|0|0|0	0	-11.45	0.75	0.5
CG18746	CG3584	FBgn0022984	qkr58E-3	9|12	21	10.5	2	0|0|0|10|11|0|3|0|0|0|2	0	-15.71	1.31	0.58
CG18746	CG32786	FBgn0052786	CG32786	3|1	4	2	2	0|0|0|0|0|0|0|0|0|0|0	0.5	1.17	20	0.12
CG18746	CG33714	FBgn0064117	SLIRP1	0|2	2	1	2	0|0|0|1|1|0|3|0|0|0|0	0.01	-7.29	0.6	0.43
CG18746	CG4916	FBgn0004419	me31B	6|5	11	5.5	2	0|0|0|11|9|0|6|0|2|6|0	0	-24.81	0.63	0.65
CG18746	CG4917	FBgn0039003	wfs1	3|2	5	2.5	2	0|0|0|0|0|0|1|0|0|0|1	0.55	-0.38	3.75	0.06
CG18746	CG44154	FBgn0265003	koi	9|4	13	6.5	2	5|0|4|11|22|1|4|3|3|4|0	0	-42.34	0.51	0.66
CG18746	CG4912	FBgn0032198	eEF1delta	1|1	2	1	2	3|0|2|12|10|0|15|0|0|0|6	0	-50.29	0.08	0.7
CG18746	CG4913	FBgn0026441	ear	4|7	11	5.5	2	0|0|0|0|0|0|8|0|0|0|0	0.19	-3.54	2.06	0.33
CG18746	CG12532	FBgn0010380	AP-1-2beta	4|8	12	6	2	0|0|3|4|7|0|4|0|0|0|3	0	-12.71	1.2	0.51
CG18746	CG5436	FBgn0001230	Hsp68	23|19	42	21	2	11|0|11|11|13|0|13|0|9|0|13	0	-19.33	1.62	0.6
CG18746	CG3907	FBgn0034958	CG3907	5|7	12	6	2	0|0|0|0|0|0|0|0|0|0|0	1	8.47	60	0
CG18746	CG12325	FBgn0033557	CG12325	2|1	3	1.5	2	0|0|0|0|0|0|0|0|0|0|0	0.48	1.17	15	0.17
CG18746	CG12736	FBgn0033184	mEFTu2	2|4	6	3	2	0|0|3|0|0|0|0|0|0|0|0	0.47	-1.01	3	0.27
CG18746	CG7055	FBgn0030093	Bap111	3|1	4	2	2	0|0|0|2|2|0|11|0|0|0|1	0	-17.88	0.4	0.6
CG18746	CG9684	FBgn0037583	CG9684	2|1	3	1.5	2	8|1|9|0|0|0|2|0|0|0|2	0	-24.01	0.24	0.7
CG18746	CG8026	FBgn0033391	CG8026	1|2	3	1.5	2	0|0|0|0|0|0|0|0|0|0|0	0.48	1.17	15	0.17
CG18746	CG10423	FBgn0039300	RpS27	8|11	19	9.5	2	11|0|10|9|9|13|7|8|5|8|4	0	-29.59	0.84	0.65
CG18746	CG17437	FBgn0040066	wds	19|17	36	18	2	5|0|6|4|3|0|7|0|0|0|6	0.76	0.33	2.84	0.02
CG18746	CG5726	FBgn0034313	CG5726	5|3	8	4	2	0|0|0|7|4|0|2|0|0|0|1	0	-11.81	0.92	0.55
CG18746	CG14411	FBgn0030582	CG14411	2|2	4	2	2	0|0|0|0|0|0|0|0|0|2|0	0.46	-0.16	3	0.27
CG18746	CG10425	FBgn0039304	CG10425	2|2	4	2	2	0|0|0|0|0|0|0|0|0|0|2	0.46	-0.16	3	0.27
CG18746	CG9750	FBgn0040075	rept	6|5	11	5.5	2	6|0|3|4|7|0|4|0|0|2|4	0	-13.63	0.97	0.59
CG18746	CG17068	FBgn0031098	CG17068	2|0	2	1	2	0|0|0|7|6|0|5|0|0|0|0	0	-26.05	0.17	0.64
CG18746	CG10060	FBgn0001104	Galphai	2|3	5	2.5	2	2|0|2|3|2|0|1|0|0|0|2	0.01	-6.23	1.07	0.45
CG18746	CG7619	FBgn0015283	Rpn10	2|2	4	2	2	1|0|2|1|1|2|3|0|0|0|3	0	-7.42	0.75	0.5
CG18746	CG15141	FBgn0032635	CG15141	1|2	3	1.5	2	0|0|0|0|0|0|0|0|0|0|0	0.48	1.17	15	0.17
CG18746	CG6543	FBgn0033879	CG6543	0|3	3	1.5	2	3|2|2|9|6|0|8|0|2|0|3	0	-33.45	0.2	0.7
CG18746	CG2050	FBgn0002780	mod	28|37	65	32.5	2	2|2|11|10|11|0|59|0|0|0|11	0	-53.86	1.2	0.68
CG18746	CG9904	FBgn0040336	Seipin	1|1	2	1	2	0|0|0|0|0|0|0|0|0|0|0	0	1.17	10	0.7
CG18746	CG14782	FBgn0025381	rush	1|1	2	1	2	0|0|0|0|0|0|3|0|0|0|1	0	-4.04	0.75	0.7
CG18746	CG32344	FBgn0052344	CG32344	4|7	11	5.5	2	0|0|0|0|0|0|0|0|0|0|0	1	6.79	55	0
CG18746	CG9901	FBgn0011742	Arp2	4|0	4	2	2	9|2|12|3|1|0|4|0|5|4|6	0	-39.35	0.22	0.7
CG18746	CG6129	FBgn0039152	Root	0|2	2	1	2	0|0|0|0|0|0|0|0|0|0|0	0.48	-1.34	10	0.17
CG18746	CG2929	FBgn0037339	Pi4KIIalpha	2|2	4	2	2	0|0|0|0|0|0|0|0|0|0|0	0.96	3.2	20	0.01
CG18746	CG11306	FBgn0037108	CG11306	7|5	12	6	2	0|0|0|1|2|2|0|0|2|1|0	0.56	-0.9	3	0.06
CG18746	CG4147	FBgn0001218	Hsc70-3	50|53	103	51.5	2	28|8|40|84|92|42|76|19|25|26|44	0	-231.83	0.61	0.69
CG18746	CG14788	FBgn0266284	Ns3	2|3	5	2.5	2	0|0|0|5|2|0|2|0|0|0|2	0	-8.55	0.83	0.51
CG18746	CG7438	FBgn0086347	Myo31DF	12|6	18	9	2	13|0|24|2|5|0|16|3|0|0|3	0	-58.73	0.51	0.68
CG18746	CG7439	FBgn0087035	AGO2	14|19	33	16.5	2	5|0|5|8|4|2|10|3|0|0|2	0.1	-7.93	2.15	0.36
CG18746	CG3756	FBgn0031657	CG3756	6|11	17	8.5	2	4|0|0|24|18|4|10|4|3|2|10	0	-57.12	0.49	0.68
CG18746	CG3751	FBgn0261596	RpS24	4|7	11	5.5	2	0|0|0|4|4|5|3|2|2|1|0	0	-10.37	1.27	0.49
CG18746	CG3752	FBgn0012036	Aldh	17|27	44	22	2	11|0|6|18|9|0|14|5|1|2|6	0	-26.78	1.53	0.59
CG18746	CG7430	FBgn0036762	CG7430	1|1	2	1	2	5|1|9|8|2|0|8|0|0|0|0	0	-32.88	0.12	0.7
CG18746	CG15099	FBgn0034400	CG15099	2|0	2	1	2	0|0|0|0|0|0|0|0|0|0|0	0.48	-1.34	10	0.17
CG18746	CG12530	FBgn0010341	Cdc42	3|2	5	2.5	2	0|0|0|5|3|0|5|0|0|0|0	0	-13.68	0.58	0.58
CG18746	CG3051	FBgn0023169	AMPKalpha	4|0	4	2	2	3|0|0|6|11|1|1|2|3|2|3	0	-28.73	0.3	0.63
CG18746	CG3056	FBgn0024987	ssx	4|6	10	5	2	0|0|0|9|9|0|4|0|0|0|3	0	-21.56	0.68	0.63
CG18746	CG13608	FBgn0039159	mRpS24	1|1	2	1	2	0|0|0|0|0|0|0|0|0|0|0	0	1.17	10	0.7
CG18746	CG9128	FBgn0283500	Sac1	5|1	6	3	2	0|0|0|0|0|0|1|0|0|0|4	0.24	-5.18	1.8	0.31
CG18746	CG7611	FBgn0037094	CG7611	0|3	3	1.5	2	0|0|0|0|0|0|0|0|0|0|0	0.5	-1.34	15	0.12
CG18746	CG5366	FBgn0027568	Cand1	7|6	13	6.5	2	0|0|0|6|0|0|0|0|0|0|0	0.6	0.13	3.25	0.05
CG18746	CG5028	FBgn0039358	CG5028	3|5	8	4	2	2|0|2|1|2|0|3|3|5|3|2	0	-9.49	1.09	0.5
CG18746	CG43658	FBgn0263706	CG43658	2|0	2	1	2	0|0|0|0|0|0|0|0|0|0|0	0.48	-1.34	10	0.17
CG18746	CG11188	FBgn0031851	Aatf	7|5	12	6	2	0|0|0|0|0|0|0|0|0|0|0	1	8.47	60	0
CG18746	CG7752	FBgn0259785	pzg	15|13	28	14	2	1|0|3|17|19|0|16|0|0|0|3	0	-43.55	0.81	0.67
CG18746	CG9124	FBgn0022023	eIF3h	7|10	17	8.5	2	2|0|2|7|5|0|4|0|0|0|4	0	-9.56	1.59	0.47
CG18746	CG5382	FBgn0038950	CG5382	2|0	2	1	2	0|0|0|0|0|0|2|0|0|0|0	0.23	-3.51	1.5	0.31
CG18746	CG7757	FBgn0036915	Prp3	4|13	17	8.5	2	1|0|2|2|3|3|2|0|0|0|4	0.5	-6.84	2.55	0.17
CG18746	CG6061	FBgn0033846	mip120	4|1	5	2.5	2	9|0|6|8|8|4|12|0|0|0|2	0	-38.66	0.26	0.7
CG18746	CG10470	FBgn0032746	CG10470	1|2	3	1.5	2	0|0|0|0|0|0|0|0|0|0|0	0.48	1.17	15	0.17
CG18746	CG1972	FBgn0039691	IntS11	1|3	4	2	2	0|0|0|5|4|3|0|0|0|3|0	0	-14.45	0.5	0.57
CG18746	CG1977	FBgn0250789	alpha-Spec	160|51	211	105.5	2	142|17|143|35|25|12|107|22|100|30|47	0	-416.91	0.81	0.69
CG18746	CG4001	FBgn0003071	Pfk	3|0	3	1.5	2	0|0|0|2|0|0|0|0|0|0|0	0.34	-3.51	2.25	0.29
CG18746	CG4003	FBgn0040078	pont	9|9	18	9	2	14|3|7|11|12|2|15|2|0|0|8	0	-36.67	0.66	0.67
CG18746	CG6699	FBgn0025724	beta'COP	23|22	45	22.5	2	7|2|15|196|186|8|73|5|12|14|67	0	-585.38	0.15	0.7
CG18746	CG6751	FBgn0263510	nclb	7|10	17	8.5	2	0|1|3|2|2|0|2|0|0|0|3	0.67	-0.51	3.19	0.04
CG18746	CG6756	FBgn0032397	Tom70	10|10	20	10	2	5|2|2|3|3|2|0|0|1|2|3	0.52	0.06	2.73	0.07
CG18746	CG11988	FBgn0002932	neur	1|1	2	1	2	0|0|0|0|0|0|0|0|0|0|0	0	1.17	10	0.7
CG18746	CG33888	FBgn0053888	His2B:CG33888	1|1	2	1	2	0|0|0|0|0|0|3|0|0|0|0	0	-2.53	1	0.7
CG18746	CG1403	FBgn0011710	2018-09-01	4|2	6	3	2	0|0|0|3|4|0|3|0|0|0|3	0	-9.84	0.9	0.51
CG18746	CG11984	FBgn0037655	Kcmf1	6|6	12	6	2	6|0|6|23|13|10|8|3|2|2|3	0	-48.89	0.39	0.7
CG18746	CG33884	FBgn0053884	His2B:CG33884	1|1	2	1	2	0|0|0|0|0|0|3|0|0|0|0	0	-2.53	1	0.7
CG18746	CG5920	FBgn0004867	RpS2	20|20	40	20	2	9|1|8|15|9|6|10|3|5|6|8	0	-12.26	1.76	0.58
CG18746	CG1406	FBgn0033210	U2A	4|17	21	10.5	2	0|0|0|0|0|0|0|0|0|0|0	1	6.79	105	0
CG18746	CG13887	FBgn0035165	CG13887	0|2	2	1	2	0|0|0|3|2|0|5|0|0|0|3	0	-15.84	0.27	0.58
CG18746	CG33880	FBgn0053880	His2B:CG33880	1|1	2	1	2	0|0|0|0|0|0|3|0|0|0|0	0	-2.53	1	0.7
CG18746	CG14209	FBgn0031039	Shawn	2|1	3	1.5	2	0|0|0|0|0|0|0|0|0|0|0	0.48	1.17	15	0.17
CG18746	CG8448	FBgn0034091	mrj	5|5	10	5	2	0|0|0|6|4|2|0|4|5|3|0	0	-11.27	1	0.57
CG18746	CG44159	FBgn0265042	Irk1	6|3	9	4.5	2	0|0|0|2|2|0|0|0|0|0|0	0.59	-1.34	3.38	0.05
CG18746	CG9354	FBgn0037686	RpL34b	2|0	2	1	2	1|0|2|2|3|0|8|0|0|0|2	0	-18.43	0.23	0.6
CG18746	CG10324	FBgn0038454	CG10324	1|3	4	2	2	0|0|0|0|0|0|3|0|0|0|0	0.25	-2.53	2	0.3
CG18746	CG14971	FBgn0035449	CG14971	1|2	3	1.5	2	0|0|0|0|0|0|0|0|0|0|0	0.48	1.17	15	0.17
CG18746	CG6050	FBgn0024556	mEFTu1	5|13	18	9	2	2|1|0|6|6|0|5|0|0|0|2	0.04	-13.63	1.59	0.39
CG18746	CG43374	FBgn0263132	Cht6	0|2	2	1	2	0|0|0|0|0|0|0|0|0|0|0	0.48	-1.34	10	0.17
CG18746	CG7110	FBgn0032521	CG7110	2|0	2	1	2	0|0|0|7|7|0|2|0|0|0|6	0	-29.03	0.15	0.7
CG18746	CG8332	FBgn0034138	RpS15	15|29	44	22	2	5|1|2|16|12|16|13|3|9|4|5	0	-32.01	1.47	0.59
CG18746	CG14996	FBgn0035499	Chd64	5|6	11	5.5	2	4|0|8|9|8|0|17|2|0|0|9	0	-36.5	0.47	0.67
CG18746	CG14648	FBgn0263594	lost	13|13	26	13	2	3|1|13|23|12|3|17|2|0|0|14	0	-46.07	0.72	0.68
CG18746	CG17723	FBgn0035432	ZnT63C	5|3	8	4	2	0|0|0|0|0|0|0|0|3|0|0	0.64	0.03	4	0.04
CG18746	CG30389	FBgn0050389	CG30389	1|3	4	2	2	0|0|0|0|0|0|0|0|0|0|0	0.5	1.17	20	0.12
CG18746	CG9543	FBgn0027496	epsilonCOP	3|5	8	4	2	5|1|2|29|26|4|13|0|3|2|12	0	-88.15	0.18	0.7
CG18746	CG16952	FBgn0030701	CG16952	1|1	2	1	2	0|0|0|5|6|0|1|0|0|0|4	0	-18.62	0.2	0.7
CG18746	CG4560	FBgn0038369	Arpc3A	0|2	2	1	2	7|0|5|0|3|0|3|0|0|0|3	0	-21.63	0.2	0.62
CG18746	CG32138	FBgn0267795	Frl	16|18	34	17	2	5|2|8|37|30|5|5|5|8|8|6	0	-66.33	0.68	0.68
CG18746	CG8103	FBgn0262519	Mi-2	2|0	2	1	2	0|0|0|0|0|0|0|0|0|0|0	0.48	-1.34	10	0.17
CG18746	CG8231	FBgn0027329	CCT6	10|9	19	9.5	2	7|0|10|10|11|6|12|3|5|7|12	0	-29.16	0.81	0.66
CG18746	CG8230	FBgn0027607	CG8230	2|1	3	1.5	2	1|0|2|3|3|3|0|0|0|0|0	0	-10.38	0.5	0.54
CG18746	CG2941	FBgn0029686	CG2941	5|3	8	4	2	0|0|0|0|0|0|0|0|0|0|0	1	5.04	40	0
CG18746	CG8235	FBgn0033351	AIMP1	5|3	8	4	2	0|0|0|2|1|0|0|0|0|0|0	0.67	-0.2	4	0.04
CG18746	CG30382	FBgn0050382	CG30382	2|3	5	2.5	2	2|0|2|9|9|5|8|3|3|3|6	0	-31.45	0.29	0.7
CG18746	CG17018	FBgn0039972	CG17018	3|0	3	1.5	2	0|0|0|0|3|0|0|0|0|0|0	0.25	-3.93	1.5	0.3
CG18746	CG13387	FBgn0020497	emb	5|3	8	4	2	1|1|2|8|8|0|9|0|0|0|7	0	-27.61	0.48	0.65
CG18746	CG10630	FBgn0035608	blanks	6|7	13	6.5	2	0|3|10|15|14|0|15|3|0|2|8	0	-46.62	0.44	0.68
CG18746	CG4254	FBgn0011726	tsr	4|5	9	4.5	2	4|2|7|16|11|1|30|3|5|0|15	0	-74.94	0.22	0.7
CG18746	CG4258	FBgn0020305	dbe	2|3	5	2.5	2	0|0|0|1|1|0|2|0|0|0|0	0.14	-2.68	1.88	0.34
CG18746	CG31184	FBgn0051184	LSm3	0|3	3	1.5	2	0|0|0|0|0|0|0|0|0|0|0	0.5	-1.34	15	0.12
CG18746	CG31332	FBgn0260463	Unc-115b	4|5	9	4.5	2	3|0|9|0|0|3|7|3|1|1|6	0	-21.52	0.61	0.63
CG18746	CG2970	FBgn0034936	CG2970	2|7	9	4.5	2	0|0|0|2|3|0|2|0|0|0|0	0.32	-6.23	1.93	0.29
CG18746	CG31712	FBgn0051712	CG31712	0|4	4	2	2	0|0|0|0|0|0|0|0|0|0|0	0.5	-1.34	20	0.1
CG18746	CG5904	FBgn0036557	mRpS31	0|2	2	1	2	0|0|0|0|0|0|0|0|0|0|0	0.48	-1.34	10	0.17
CG18746	CG1575	FBgn0029999	CG1575	6|5	11	5.5	2	0|0|0|0|0|0|0|0|0|0|0	1	8.47	55	0
CG18746	CG4097	FBgn0002284	Prosbeta6	2|4	6	3	2	3|0|1|4|2|0|6|0|2|4|0	0	-15.01	0.64	0.58
CG18746	CG1572	FBgn0030309	CG1572	1|2	3	1.5	2	0|0|0|0|0|0|0|0|0|0|0	0.48	1.17	15	0.17
CG18746	CG6995	FBgn0039229	Saf-B	0|7	7	3.5	2	0|0|0|5|6|0|9|0|0|0|2	0	-29.03	0.53	0.6
CG18746	CG5594	FBgn0261794	kcc	2|0	2	1	2	0|0|0|4|3|0|3|0|0|0|0	0	-14.37	0.3	0.56
CG18746	CG1907	FBgn0039674	CG1907	7|2	9	4.5	2	0|0|0|2|2|0|0|0|7|3|0	0	-12.17	1.12	0.46
CG18746	CG6944	FBgn0002525	Lam	2|3	5	2.5	2	24|4|36|6|6|0|19|2|0|0|3	0	-107.74	0.09	0.7
CG18746	CG6370	FBgn0034277	OstDelta	7|5	12	6	2	1|0|5|13|12|5|13|2|4|8|6	0	-40.73	0.47	0.67
CG18746	CG1249	FBgn0261789	SmD2	12|11	23	11.5	2	3|0|0|0|0|0|8|0|0|0|1	0.35	-1	2.88	0.28
CG18746	CG1893	FBgn0035390	scramb2	1|2	3	1.5	2	0|0|0|0|0|0|0|0|0|0|0	0.48	1.17	15	0.17
CG18746	CG2980	FBgn0034939	thoc5	1|12	13	6.5	2	0|0|0|0|0|0|0|0|0|0|0	0.5	1.17	65	0.08
CG18746	CG6378	FBgn0026562	SPARC	2|2	4	2	2	0|0|0|3|2|0|0|0|2|0|0	0	-6.23	0.86	0.48
CG18746	CG8801	FBgn0028473	Non1	3|2	5	2.5	2	0|0|0|0|0|0|0|0|0|0|0	0.98	3.2	25	0
CG18746	CG9539	FBgn0086357	Sec61alpha	3|3	6	3	2	0|0|0|0|0|2|0|1|3|2|0	0.01	-4.76	1.29	0.44
CG18746	CG1475	FBgn0037351	RpL13A	5|5	10	5	2	0|0|0|6|5|0|5|0|0|0|2	0	-12.45	0.94	0.58
CG18746	CG9575	FBgn0031090	Rab35	2|0	2	1	2	0|0|0|3|0|0|0|0|0|0|0	0.13	-3.93	1	0.35
CG18746	CG4877	FBgn0036624	RAF2	15|19	34	17	2	0|0|0|70|59|0|17|0|0|0|12	0	-164.21	0.35	0.69
CG18746	CG6404	FBgn0027615	CG6404	1|1	2	1	2	0|0|0|1|1|0|0|0|0|0|0	0	-1.77	1.5	0.7
CG18746	CG8764	FBgn0011227	ox	2|2	4	2	2	0|0|0|0|0|1|0|1|1|2|0	0.06	-2.68	1.5	0.37
CG18746	CG1291	FBgn0035401	CG1291	3|2	5	2.5	2	0|0|0|0|0|0|0|0|0|0|0	0.98	3.2	25	0
CG18746	CG7808	FBgn0039713	RpS8	14|19	33	16.5	2	6|1|10|13|12|7|10|5|5|6|8	0	-21.73	1.41	0.61
CG18746	CG17158	FBgn0011570	cpb	3|3	6	3	2	9|0|12|3|2|3|5|3|2|1|5	0	-28.91	0.35	0.7
CG18746	CG42320	FBgn0265998	Doa	2|32	34	17	2	0|0|0|2|5|0|3|0|0|0|0	0.5	-9.84	5.1	0.08
CG18746	CG3780	FBgn0015818	Spx	0|4	4	2	2	0|0|0|0|0|0|0|0|0|0|0	0.5	-1.34	20	0.1
CG18746	CG10978	FBgn0037374	jagn	2|3	5	2.5	2	0|0|0|0|0|0|0|0|0|0|0	0.98	3.2	25	0
CG18746	CG8249	FBgn0034045	CG8249	2|0	2	1	2	0|0|0|0|0|0|0|0|0|0|0	0.48	-1.34	10	0.17
CG18746	CG14224	FBgn0031057	Ubqn	4|7	11	5.5	2	8|0|25|4|0|0|7|0|0|0|0	0	-44.95	0.41	0.67
CG18746	CG32593	FBgn0264078	Flo2	29|36	65	32.5	2	21|1|13|0|0|9|2|6|24|34|5	0	-51.5	1.23	0.67
CG18746	CG11513	FBgn0041164	armi	2|0	2	1	2	0|0|0|0|0|0|0|0|0|0|0	0.48	-1.34	10	0.17
CG18746	CG8241	FBgn0086895	pea	5|15	20	10	2	0|0|0|0|0|0|0|0|0|0|0	1	8.47	100	0
CG18746	CG5064	FBgn0035947	Srp68	2|0	2	1	2	0|0|0|0|2|0|3|0|0|0|0	0.01	-7.26	0.6	0.43
CG18746	CG3379	FBgn0013981	His4r	1|2	3	1.5	2	2|0|1|0|0|0|3|0|0|0|1	0	-6.47	0.75	0.46
CG18746	CG4951	FBgn0039563	CG4951	1|3	4	2	2	0|0|0|0|0|0|13|0|0|0|0	0	-14.75	0.46	0.57
CG18746	CG11777	FBgn0033527	CG11777	0|4	4	2	2	0|0|0|0|0|0|0|0|0|0|0	0.5	-1.34	20	0.1
CG18746	CG4954	FBgn0034258	eIF3c	12|14	26	13	2	0|1|4|8|10|2|10|2|3|4|5	0	-16.43	1.39	0.6
CG18746	CG4618	FBgn0035589	CHMP2B	4|2	6	3	2	8|1|7|0|0|0|3|0|0|0|1	0	-20.37	0.5	0.62
CG18746	CG1542	FBgn0039828	CG1542	16|17	33	16.5	2	0|0|0|0|0|0|19|0|0|0|2	0.02	-4.27	2.36	0.42
CG18746	CG3371	FBgn0035153	ebd1	3|0	3	1.5	2	0|0|0|0|0|0|0|0|0|0|0	0.5	-1.34	15	0.12
CG18746	CG4897	FBgn0005593	RpL7	24|19	43	21.5	2	3|1|4|13|10|2|12|0|0|0|8	0	-14.75	1.84	0.53
CG18746	CG8597	FBgn0011640	lark	11|16	27	13.5	2	0|0|3|51|46|0|27|0|1|3|7	0	-144.59	0.33	0.69
CG18746	CG32435	FBgn0021760	chb	0|2	2	1	2	0|0|0|0|0|0|0|0|0|0|0	0.48	-1.34	10	0.17
CG18746	CG3178	FBgn0004584	Rrp1	3|2	5	2.5	2	6|2|8|0|0|0|97|0|0|0|0	0	-153.27	0.07	0.7
CG18746	CG4389	FBgn0028479	Mtpalpha	21|34	55	27.5	2	4|3|6|13|11|2|17|2|0|2|15	0	-23.46	1.83	0.49
CG18746	CG6474	FBgn0000617	e(y)1	3|3	6	3	2	2|1|2|0|2|0|0|0|0|0|0	0.03	-3.59	1.5	0.41
CG18746	CG9007	FBgn0036398	upSET	0|2	2	1	2	0|0|0|0|0|0|0|0|0|0|0	0.48	-1.34	10	0.17
CG18746	CG4087	FBgn0002593	RpLP1	19|16	35	17.5	2	5|1|6|6|2|5|12|1|3|2|3	0.02	-6.72	2.19	0.42
CG18746	CG5792	FBgn0032455	Pih1D1	0|2	2	1	2	0|0|0|4|3|0|2|0|0|0|0	0	-12.88	0.33	0.54
CG18746	CG1616	FBgn0015929	dpa	2|1	3	1.5	2	0|0|0|7|7|0|14|0|0|3|3	0	-37.04	0.16	0.7
CG18746	CG4600	FBgn0040064	yip2	0|2	2	1	2	0|2|2|13|7|1|11|1|0|0|3	0	-45.29	0.1	0.7
CG18746	CG3395	FBgn0010408	RpS9	19|20	39	19.5	2	9|1|8|9|8|7|8|2|4|0|6	0.02	-4.67	2.25	0.41
CG18746	CG2998	FBgn0030136	RpS28b	2|3	5	2.5	2	3|0|1|2|2|2|4|2|3|2|3	0	-9.84	0.75	0.54
CG18746	CG15100	FBgn0034401	MetRS	17|15	32	16	2	1|0|2|9|5|0|8|0|0|0|4	0.03	-5.48	2.18	0.4
CG18746	CG33105	FBgn0053105	p24-2	1|1	2	1	2	0|0|0|0|0|0|1|0|0|0|1	0	-1.77	1.5	0.7
CG18746	CG3944	FBgn0017567	ND-23	0|2	2	1	2	0|0|0|0|0|0|0|0|0|0|0	0.48	-1.34	10	0.17
CG18746	CG7382	FBgn0031708	CG7382	3|1	4	2	2	0|0|0|0|0|0|0|0|0|0|0	0.5	1.17	20	0.12
CG18746	CG4769	FBgn0035600	Cyt-c1	3|9	12	6	2	3|0|2|10|6|2|8|1|2|2|5	0	-26.23	0.75	0.61
CG18746	CG7380	FBgn0031977	baf	3|4	7	3.5	2	62|3|27|1|1|1|5|4|1|1|3	0	-124.95	0.11	0.7
CG18746	CG4634	FBgn0016687	Nurf-38	4|0	4	2	2	2|2|7|9|11|0|24|0|0|0|9	0	-64	0.14	0.7
CG18746	CG4878	FBgn0034237	eIF3b	6|5	11	5.5	2	0|0|0|12|18|0|8|0|0|0|3	0	-40.51	0.43	0.67
CG18746	CG8798	FBgn0036892	Lon	6|6	12	6	2	12|0|5|6|6|0|3|0|0|0|0	0	-20.4	0.75	0.63
CG18746	CG8799	FBgn0010549	l(2)03659	2|0	2	1	2	0|0|0|0|0|0|0|0|0|0|0	0.48	-1.34	10	0.17
CG18746	CG4620	FBgn0004395	unk	6|2	8	4	2	0|0|0|11|12|0|2|0|0|0|2	0	-29.52	0.48	0.64
CG18746	CG15697	FBgn0038834	RpS30	2|4	6	3	2	4|0|3|3|3|2|4|1|1|1|2	0	-11.12	0.82	0.53
CG18746	CG8415	FBgn0033912	RpS23	12|20	32	16	2	6|0|5|10|8|6|11|3|7|1|4	0	-17.59	1.66	0.5
CG18746	CG8142	FBgn0030871	CG8142	4|0	4	2	2	13|2|6|1|1|0|0|0|0|0|0	0	-29.83	0.29	0.63
CG18746	CG8790	FBgn0027610	Dic1	6|4	10	5	2	0|0|0|0|3|2|2|0|2|2|0	0.18	-3.35	2.14	0.33
CG18746	CG17471	FBgn0039924	PIP4K	5|4	9	4.5	2	0|0|0|0|0|0|0|0|0|0|0	1	6.79	45	0
CG18746	CG8793	FBgn0260655	l(3)76BDm	5|5	10	5	2	0|0|0|0|0|0|0|0|0|0|0	1	8.47	50	0
CG18746	CG4180	FBgn0001977	CIAPIN1	6|5	11	5.5	2	0|0|0|0|0|0|2|0|0|0|0	0.93	2.25	8.25	0.01
CG18746	CG8064	FBgn0038597	CG8064	2|3	5	2.5	2	0|0|0|0|0|0|0|0|0|0|0	0.98	3.2	25	0
CG18746	CG32775	FBgn0066114	GlcAT-I	3|2	5	2.5	2	0|0|0|0|0|0|0|0|0|0|0	0.98	3.2	25	0
CG18746	CG2253	FBgn0029992	Upf2	3|5	8	4	2	0|0|0|0|0|0|0|0|0|0|0	1	5.04	40	0
CG18746	CG4747	FBgn0043456	CG4747	11|9	20	10	2	5|0|2|6|5|0|32|0|4|4|2	0	-37.95	0.7	0.67
CG18746	CG17295	FBgn0032034	Rcd4	1|1	2	1	2	0|0|0|0|0|0|0|0|0|0|0	0	1.17	10	0.7
CG18746	CG30005	FBgn0050005	GstT2	3|1	4	2	2	0|0|0|0|0|0|0|0|0|0|0	0.5	1.17	20	0.12
CG18746	CG9946	FBgn0261609	eIF2alpha	18|13	31	15.5	2	6|0|9|8|8|6|12|2|0|0|8	0	-16.17	1.6	0.55
CG18746	CG9947	FBgn0030752	CG9947	2|1	3	1.5	2	0|0|0|0|0|0|0|0|0|0|0	0.48	1.17	15	0.17
CG18746	CG9945	FBgn0034527	CG9945	2|2	4	2	2	0|0|0|4|4|0|0|0|0|0|0	0	-7.26	0.75	0.5
CG18746	CG2789	FBgn0031263	Tspo	1|1	2	1	2	0|0|0|2|1|0|2|0|0|0|0	0	-5.37	0.6	0.7
CG18746	CG3651	FBgn0032974	CG3651	2|1	3	1.5	2	0|0|0|0|0|0|0|0|0|0|0	0.48	1.17	15	0.17
CG18746	CG42610	FBgn0266084	Fhos	0|2	2	1	2	0|0|0|0|0|0|0|0|0|0|0	0.48	-1.34	10	0.17
CG18746	CG1939	FBgn0037469	Dpck	3|2	5	2.5	2	3|0|3|0|0|4|1|2|2|1|1	0	-9.84	0.75	0.53
CG18746	CG40451	FBgn0263977	Tim17b	2|0	2	1	2	0|0|0|0|0|0|0|0|0|0|0	0.48	-1.34	10	0.17
CG18746	CG7359	FBgn0260855	Sec22	2|1	3	1.5	2	0|0|0|0|0|0|1|0|2|0|3	0	-6.47	0.75	0.46
CG18746	CG46280	FBgn0283438	CG46280	2|0	2	1	2	0|0|0|0|0|0|0|0|0|0|0	0.48	-1.34	10	0.17
CG18746	CG1059	FBgn0087013	Karybeta3	3|3	6	3	2	0|3|3|10|11|0|14|0|0|0|7	0	-41.44	0.26	0.7
CG18746	CG15218	FBgn0025674	CycK	4|7	11	5.5	2	2|0|3|0|0|4|0|1|3|2|0	0.03	-6.84	1.65	0.4
CG18746	CG2982	FBgn0266570	CG2982	15|22	37	18.5	2	0|0|0|2|0|0|18|0|0|0|0	0.24	-4.23	2.77	0.31
CG18746	CG7516	FBgn0261535	l(2)34Fd	2|0	2	1	2	0|0|0|0|0|0|0|0|0|0|0	0.48	-1.34	10	0.17
CG18746	CG5289	FBgn0015282	Rpt2	4|6	10	5	2	7|0|7|10|13|5|15|3|7|3|5	0	-43.08	0.39	0.7
CG18746	CG6998	FBgn0011760	ctp	0|2	2	1	2	5|0|5|4|3|0|8|0|0|0|4	0	-26.05	0.17	0.7
CG18746	CG3779	FBgn0002973	numb	4|0	4	2	2	0|0|0|0|0|0|0|0|0|0|0	0.5	-1.34	20	0.1
CG18746	CG7558	FBgn0262716	Arp3	5|3	8	4	2	7|1|10|9|9|1|6|2|4|3|3	0	-31.71	0.43	0.7
CG18746	CG5208	FBgn0266053	Patr-1	8|5	13	6.5	2	1|0|3|8|7|2|0|0|0|0|0	0	-14.81	1.08	0.57
CG18746	CG12079	FBgn0266582	ND-30	3|6	9	4.5	2	3|0|0|3|4|0|0|0|0|0|0	0.01	-8.3	1.35	0.44
CG18746	CG34422	FBgn0085451	htk	2|0	2	1	2	0|0|0|0|0|0|5|0|0|0|0	0.02	-6.89	0.6	0.41
CG18746	CG17272	FBgn0038830	CG17272	3|0	3	1.5	2	0|0|0|0|0|0|0|0|0|0|0	0.5	-1.34	15	0.12
CG18746	CG10263	FBgn0032812	Hakai	0|3	3	1.5	2	0|0|0|0|0|0|5|0|0|0|0	0.08	-6.89	0.9	0.37
CG18746	CG5474	FBgn0011016	SsRbeta	3|3	6	3	2	3|0|2|3|2|3|3|0|4|3|2	0	-8.3	0.9	0.52
CG18746	CG32434	FBgn0026179	siz	3|0	3	1.5	2	0|0|0|7|10|0|0|0|0|0|3	0	-28.85	0.22	0.64
CG18746	CG7471	FBgn0015805	HDAC1	2|2	4	2	2	0|0|0|1|2|0|2|0|0|0|0	0.02	-3.86	1.2	0.42
CG18746	CG11076	FBgn0039929	CG11076	5|7	12	6	2	0|0|0|0|0|0|3|0|0|0|0	0.84	1.24	6	0.02
CG18746	CG5479	FBgn0034893	mRpL43	2|0	2	1	2	0|0|0|2|0|0|2|0|0|0|0	0.03	-5.93	0.75	0.4
CG18746	CG5575	FBgn0011236	ken	0|3	3	1.5	2	0|0|0|12|11|0|1|0|0|0|2	0	-35.88	0.18	0.66
CG18746	CG10364	FBgn0027949	msb1l	2|0	2	1	2	0|0|0|3|2|0|0|0|0|0|0	0.01	-7.26	0.6	0.43
CG18746	CG10363	FBgn0041180	Tep4	11|4	15	7.5	2	0|0|3|15|10|0|26|0|0|0|7	0	-60.67	0.44	0.68
CG18746	CG14816	FBgn0023517	Pgam5	9|13	22	11	2	4|0|2|5|0|0|0|0|0|0|0	0.6	-1.2	3	0.05
CG18746	CG7989	FBgn0262560	wcd	5|8	13	6.5	2	0|0|0|0|0|0|0|0|0|0|0	1	8.47	65	0
CG18746	CG9484	FBgn0002431	hyd	9|12	21	10.5	2	5|1|9|54|44|7|17|1|0|13|17	0	-136.92	0.27	0.7
CG18746	CG2028	FBgn0015024	CkIalpha	6|9	15	7.5	2	4|0|0|8|7|3|3|0|2|2|1	0	-14.52	1.18	0.57
CG18746	CG11700	FBgn0029856	CG11700	1|1	2	1	2	0|0|0|0|0|0|0|0|0|0|0	0	1.17	10	0.7
CG18746	CG9319	FBgn0032881	CG9319	6|0	6	3	2	0|0|0|0|0|0|0|0|0|0|0	0.5	-1.34	30	0.09
CG18746	CG15707	FBgn0034098	krimp	2|3	5	2.5	2	4|0|2|0|0|0|1|0|0|0|2	0	-7.42	0.94	0.48
CG18746	CG12775	FBgn0032987	RpL21	14|12	26	13	2	0|0|3|7|12|2|15|1|4|0|4	0	-23.35	1.15	0.64
CG18746	CG10161	FBgn0040227	eIF3d1	5|5	10	5	2	0|0|0|8|7|0|6|0|0|0|0	0	-18.45	0.71	0.63
CG18746	CG31869	FBgn0051869	CG31869	0|2	2	1	2	0|0|0|0|0|0|0|0|0|0|0	0.48	-1.34	10	0.17
CG18746	CG2021	FBgn0035271	CG2021	0|4	4	2	2	0|0|0|0|0|0|0|0|0|0|0	0.5	-1.34	20	0.1
CG18746	CG3008	FBgn0031643	CG3008	6|5	11	5.5	2	0|0|0|8|7|0|0|0|3|2|0	0	-14.81	0.92	0.6
CG18746	CG7014	FBgn0038277	RpS5b	1|1	2	1	2	0|0|0|0|0|0|0|0|0|0|0	0	1.17	10	0.7
CG18746	CG9193	FBgn0005655	PCNA	2|0	2	1	2	0|0|0|4|3|0|5|0|0|0|2	0	-17.24	0.25	0.59
CG18746	CG1821	FBgn0285949	RpL31	5|5	10	5	2	3|0|0|6|4|4|9|3|3|3|6	0	-18.45	0.71	0.63
CG18746	CG7726	FBgn0013325	RpL11	3|7	10	5	2	2|1|1|3|2|3|4|1|0|0|4	0.01	-9.49	1.36	0.43
CG18746	CG16910	FBgn0041205	key	4|2	6	3	2	0|0|0|0|0|0|0|0|0|0|0	0.98	3.2	30	0
CG18746	CG12114	FBgn0086362	spn-F	0|4	4	2	2	0|0|0|0|0|0|0|0|0|0|0	0.5	-1.34	20	0.1
CG18746	CG8996	FBgn0010516	wal	4|4	8	4	2	2|2|4|9|10|5|11|3|3|3|6	0	-32.12	0.4	0.7
CG18746	CG5394	FBgn0005674	GluProRS	8|7	15	7.5	2	0|0|7|12|8|0|13|0|0|0|6	0	-30.08	0.68	0.66
CG18746	CG8994	FBgn0000615	exu	5|5	10	5	2	0|0|0|0|0|0|0|0|0|0|0	1	8.47	50	0
CG18746	CG2146	FBgn0261397	didum	9|0	9	4.5	2	28|6|59|3|0|0|8|4|5|0|5	0	-139.34	0.14	0.7
CG18746	CG12153	FBgn0022786	Hira	3|1	4	2	2	0|0|0|0|0|0|0|0|0|0|0	0.5	1.17	20	0.12
CG18746	CG1965	FBgn0037466	CG1965	8|15	23	11.5	2	0|0|0|1|2|0|4|0|0|3|0	0.71	-0.32	3.83	0.03
CG18746	CG7863	FBgn0033051	Strica	13|14	27	13.5	2	9|2|16|16|19|8|9|2|5|4|6	0	-42.3	0.79	0.67
CG18746	CG5336	FBgn0032409	Ced-12	5|6	11	5.5	2	2|0|2|2|2|0|0|0|0|0|0	0.44	-0.9	2.75	0.27
CG18746	CG11739	FBgn0037239	Sfxn1-3	0|2	2	1	2	0|0|0|0|0|0|0|0|0|0|0	0.48	-1.34	10	0.17
CG18746	CG11738	FBgn0027334	l(1)G0004	1|3	4	2	2	0|0|0|0|0|0|0|0|0|0|0	0.5	1.17	20	0.12
CG18746	CG12101	FBgn0015245	Hsp60A	3|8	11	5.5	2	6|2|10|29|22|2|40|2|3|1|17	0	-121.7	0.18	0.7
CG18746	CG33886	FBgn0053886	His2B:CG33886	1|1	2	1	2	0|0|0|0|0|0|3|0|0|0|0	0	-2.53	1	0.7
CG18746	CG16983	FBgn0025637	SkpA	3|3	6	3	2	0|0|0|1|3|0|1|0|0|0|1	0.08	-2.44	1.8	0.37
CG18746	CG17291	FBgn0260439	Pp2A-29B	6|6	12	6	2	4|0|4|7|11|0|8|0|4|2|7	0	-23.01	0.69	0.65
CG18746	CG8963	FBgn0034181	CG8963	3|0	3	1.5	2	1|0|2|2|2|0|3|0|0|0|1	0	-10.06	0.64	0.46
CG18746	CG5261	FBgn0283658	muc	3|4	7	3.5	2	0|0|3|0|0|0|7|0|0|0|1	0	-9.21	0.95	0.52
CG18746	CG4287	FBgn0038388	CG4287	0|2	2	1	2	0|0|0|0|0|0|0|0|0|0|0	0.48	-1.34	10	0.17
CG18746	CG5504	FBgn0002174	l(2)tid	20|25	45	22.5	2	9|2|12|51|46|24|20|17|10|27|19	0	-123.15	0.54	0.69
CG18746	CG42668	FBgn0261550	CG42668	3|2	5	2.5	2	0|0|0|2|1|0|3|0|0|0|2	0.01	-6.23	1.07	0.45
CG18746	CG5502	FBgn0003279	RpL4	40|40	80	40	2	8|0|10|24|26|3|34|0|0|0|16	0	-41.93	1.43	0.67
CG18746	CG33926	FBgn0053926	CG33926	4|3	7	3.5	2	0|0|0|0|0|0|0|0|0|0|0	1	5.04	35	0
CG18746	CG10589	FBgn0037035	CG10589	0|2	2	1	2	0|0|0|0|0|0|0|0|0|0|0	0.48	-1.34	10	0.17
CG18746	CG1822	FBgn0014133	bif	5|0	5	2.5	2	8|0|16|9|8|0|13|0|0|0|7	0	-55.7	0.2	0.7
CG18746	CG7654	FBgn0036928	Tom20	3|5	8	4	2	0|0|0|5|2|0|3|0|2|0|2	0	-8.3	1.2	0.47
CG18746	CG33910	FBgn0053910	His2B:CG33910	1|1	2	1	2	0|0|0|0|0|0|3|0|0|0|0	0	-2.53	1	0.7
CG18746	CG42748	FBgn0261802	CG42748	7|8	15	7.5	2	11|0|8|21|26|7|16|7|5|7|10	0	-70.29	0.36	0.7
CG18746	CG7123	FBgn0261800	LanB1	2|0	2	1	2	0|0|0|8|3|0|2|0|0|0|0	0	-18.43	0.23	0.6
CG18746	CG7098	FBgn0030891	Ada3	0|2	2	1	2	0|0|0|0|0|0|0|0|0|0|0	0.48	-1.34	10	0.17
CG18746	CG5877	FBgn0030625	CG5877	5|7	12	6	2	0|0|0|0|0|0|0|0|0|0|0	1	8.47	60	0
CG18746	CG31380	FBgn0051380	CG31380	0|2	2	1	2	0|0|0|0|0|0|0|0|0|0|0	0.48	-1.34	10	0.17
CG18746	CG5870	FBgn0250788	beta-Spec	11|7	18	9	2	49|5|60|3|0|0|36|0|3|4|12	0	-186.61	0.19	0.7
CG18746	CG14464	FBgn0033000	CG14464	1|1	2	1	2	0|0|0|0|0|0|0|0|0|0|0	0	1.17	10	0.7
CG18746	CG8615	FBgn0035753	RpL18	21|15	36	18	2	0|0|6|11|11|2|10|0|0|0|7	0	-16.84	1.69	0.54
CG18746	CG8200	FBgn0024754	Flo1	30|32	62	31	2	22|1|16|4|0|7|3|4|26|33|2	0	-52.59	1.15	0.68
CG18746	CG8201	FBgn0260934	par-1	22|23	45	22.5	2	6|0|5|43|58|18|14|8|6|2|22	0	-117.3	0.55	0.69
CG18746	CG4798	FBgn0022029	l(2)k01209	2|0	2	1	2	2|0|4|6|8|0|2|0|0|2|3	0	-26.05	0.17	0.7
CG18746	CG13185	FBgn0033661	CG13185	2|0	2	1	2	0|0|0|0|0|0|2|0|0|0|0	0.23	-3.51	1.5	0.31
CG18746	CG6522	FBgn0034223	Tes	1|1	2	1	2	0|0|0|0|0|0|0|0|0|0|0	0	1.17	10	0.7
CG18746	CG6764	FBgn0037899	RpL24-like	3|3	6	3	2	0|0|0|1|3|0|0|0|0|0|0	0.23	-1.18	2.25	0.31
CG18746	CG18176	FBgn0036038	defl	2|1	3	1.5	2	0|0|0|0|0|0|0|0|0|0|0	0.48	1.17	15	0.17
CG18746	CG5913	FBgn0039385	CG5913	2|2	4	2	2	0|0|0|2|0|0|0|0|0|0|0	0.46	-0.16	3	0.27
CG18746	CG6444	FBgn0032293	Dpy-30L1	3|0	3	1.5	2	0|0|0|0|0|0|5|0|0|0|0	0.08	-6.89	0.9	0.37
CG18746	CG2098	FBgn0266268	FeCH	4|3	7	3.5	2	0|0|0|0|0|2|4|2|2|0|0	0.01	-5.94	1.31	0.44
CG18746	CG1796	FBgn0030365	Tango4	9|9	18	9	2	1|0|2|0|0|0|6|0|0|2|0	0.36	-0.56	2.7	0.28
CG18746	CG31366	FBgn0013275	Hsp70Aa	8|0	8	4	2	0|1|2|0|0|0|6|0|0|0|0	0.15	-12.56	1.33	0.34
CG18746	CG2926	FBgn0037344	CG2926	0|5	5	2.5	2	0|0|0|0|0|0|0|0|0|0|0	0.5	-1.34	25	0.09
CG18746	CG33214	FBgn0264561	Glg1	2|1	3	1.5	2	0|0|0|0|0|0|0|0|0|0|0	0.48	1.17	15	0.17
CG18746	CG8611	FBgn0027602	CG8611	6|5	11	5.5	2	0|0|0|0|0|0|4|0|0|0|0	0.73	0.76	4.12	0.03
CG18746	CG17753	FBgn0010531	Ccs	2|2	4	2	2	0|0|0|0|0|0|0|0|0|0|0	0.96	3.2	20	0.01
CG18746	CG6133	FBgn0026079	Nsun2	0|4	4	2	2	0|1|6|6|6|0|13|0|0|0|9	0	-40.81	0.21	0.66
CG18746	CG10067	FBgn0000044	Act57B	10|8	18	9	2	30|0|45|15|13|10|19|0|0|3|11	0	-110.28	0.29	0.7
CG18746	CG18572	FBgn0003189	r	3|5	8	4	2	0|2|3|27|24|9|9|3|0|6|9	0	-76.38	0.2	0.7
CG18746	CG11604	FBgn0086912	mbm	4|3	7	3.5	2	0|0|0|0|0|0|3|0|0|0|0	0.59	0.03	3.5	0.05
CG18746	CG2713	FBgn0250874	ttm50	0|2	2	1	2	0|0|0|0|0|0|0|0|0|0|0	0.48	-1.34	10	0.17
CG18746	CG12404	FBgn0032465	CG12404	0|2	2	1	2	0|0|0|0|0|0|0|0|0|0|0	0.48	-1.34	10	0.17
CG18746	CG6876	FBgn0036487	Prp31	7|14	21	10.5	2	2|0|3|3|0|0|5|0|0|0|2	0.51	-3.82	2.86	0.08
CG18746	CG6875	FBgn0000140	asp	3|0	3	1.5	2	0|0|0|0|0|0|0|0|0|0|0	0.5	-1.34	15	0.12
CG18746	CG6871	FBgn0000261	Cat	13|15	28	14	2	22|1|19|8|4|3|6|2|2|0|3	0	-39.35	0.86	0.67
CG18746	CG1738	FBgn0030291	CG1738	0|3	3	1.5	2	0|0|0|0|0|0|9|0|0|0|0	0	-11.89	0.5	0.49
CG18746	CG5595	FBgn0003330	Sce	2|2	4	2	2	0|0|0|0|0|0|0|0|0|0|0	0.96	3.2	20	0.01
CG18746	CG6684	FBgn0086472	RpS25	5|6	11	5.5	2	7|0|5|6|3|0|9|0|2|2|6	0	-19.71	0.75	0.63
CG18746	CG6202	FBgn0019925	Surf4	2|1	3	1.5	2	0|0|0|0|0|0|0|0|0|0|0	0.48	1.17	15	0.17
CG18746	CG6203	FBgn0028734	Fmr1	14|15	29	14.5	2	0|0|0|2|4|0|9|0|0|0|7	0.02	-4.58	2.17	0.41
CG18746	CG5590	FBgn0039537	CG5590	7|6	13	6.5	2	0|0|0|7|4|0|5|0|0|0|5	0	-12.16	1.15	0.57
CG18746	CG1548	FBgn0029093	cathD	5|6	11	5.5	2	4|1|9|6|10|6|7|2|6|5|5	0	-24.81	0.63	0.65
CG18746	CG5599	FBgn0030612	CG5599	4|6	10	5	2	29|1|36|2|1|0|7|0|2|2|4	0	-90.18	0.21	0.7
CG18746	CG6686	FBgn0032388	CG6686	10|17	27	13.5	2	0|0|0|1|1|4|7|2|0|0|2	0.54	-2.32	3.12	0.07
CG18746	CG12800	FBgn0039006	Cyp6d4	2|2	4	2	2	0|0|0|0|0|0|0|0|0|0|0	0.96	3.2	20	0.01
CG18746	CG6155	FBgn0014877	Roe1	0|5	5	2.5	2	5|0|1|7|9|6|6|0|4|2|2	0	-31.97	0.34	0.63
CG18746	CG7971	FBgn0035253	CG7971	17|85	102	51	2	1|0|2|0|0|0|12|0|0|0|2	0.73	-0.18	9.56	0.03
CG18746	CG42314	FBgn0259214	PMCA	2|2	4	2	2	0|0|0|0|0|0|0|0|0|0|2	0.46	-0.16	3	0.27
CG18746	CG7977	FBgn0026372	RpL23A	20|19	39	19.5	2	10|1|13|8|8|3|36|1|2|0|8	0	-41.62	0.99	0.67
CG18746	CG30159	FBgn0050159	CG30159	4|4	8	4	2	5|0|5|3|1|3|0|2|4|3|3	0	-11.56	0.86	0.57
CG18746	CG15224	FBgn0000259	CkIIbeta	4|5	9	4.5	2	0|0|0|0|0|0|0|0|0|0|0	1	6.79	45	0
CG18746	CG1708	FBgn0000352	cos	2|2	4	2	2	0|0|0|0|0|0|0|0|0|0|0	0.96	3.2	20	0.01
CG18746	CG15220	FBgn0266421	RPA3	1|2	3	1.5	2	46|3|26|1|1|0|8|0|0|0|3	0	-112.46	0.06	0.7
CG18746	CG7878	FBgn0037549	CG7878	6|12	18	9	2	0|0|0|8|9|0|8|2|0|0|1	0	-21.76	1.08	0.59
CG18746	CG17654	FBgn0000579	Eno	8|5	13	6.5	2	3|0|6|23|18|8|20|4|13|5|7	0	-72.64	0.32	0.7
CG18746	CG10986	FBgn0001087	g	3|2	5	2.5	2	0|0|0|2|0|0|0|0|0|0|0	0.56	-0.16	3.75	0.06
CG18746	CG5526	FBgn0013810	Dhc36C	0|2	2	1	2	0|0|0|0|0|0|0|0|0|0|0	0.48	-1.34	10	0.17
CG18746	CG7870	FBgn0261020	wol	2|4	6	3	2	0|0|0|0|0|0|0|0|0|2|0	0.64	-0.16	4.5	0.04
CG18746	CG32315	FBgn0024510	dlt	7|4	11	5.5	2	0|0|0|8|8|0|0|0|0|0|2	0	-16.15	0.92	0.58
CG18746	CG11427	FBgn0003210	rb	2|0	2	1	2	0|0|0|0|0|0|0|0|0|0|0	0.48	-1.34	10	0.17
CG18746	CG30147	FBgn0050147	Hil	2|0	2	1	2	0|0|0|0|0|0|0|0|0|0|0	0.48	-1.34	10	0.17
CG18746	CG7100	FBgn0015609	CadN	0|2	2	1	2	0|0|0|0|0|0|0|0|0|0|0	0.48	-1.34	10	0.17
CG18746	CG2033	FBgn0010198	RpS15Aa	15|17	32	16	2	5|1|5|11|9|7|6|2|6|3|8	0	-12.25	1.71	0.56
CG18746	CG9881	FBgn0031437	Arpc5	3|2	5	2.5	2	0|0|0|1|3|0|0|0|2|0|0	0.02	-5.04	1.25	0.42
CG18746	CG3612	FBgn0011211	blw	15|18	33	16.5	2	18|6|17|37|29|26|36|17|14|20|22	0	-105	0.49	0.7
CG18746	CG3613	FBgn0022986	qkr58E-1	16|33	49	24.5	2	0|0|0|10|13|0|9|0|0|0|2	0.5	-15.45	2.3	0.12
CG18746	CG16757	FBgn0010905	Spn	3|0	3	1.5	2	9|4|13|0|0|0|2|0|4|2|0	0	-37.6	0.17	0.7
CG18746	CG7238	FBgn0024191	sip1	6|12	18	9	2	0|0|0|2|3|6|0|2|0|3|0	0.41	-6.33	2.25	0.28
CG18746	CG9862	FBgn0034646	Rae1	2|2	4	2	2	0|0|0|5|2|0|9|0|0|0|1	0	-17.37	0.38	0.62
CG18746	CG8295	FBgn0034051	Mlf	4|2	6	3	2	0|0|0|0|0|0|0|0|0|2|0	0.64	-0.16	4.5	0.04
CG18746	CG16753	FBgn0035393	CG16753	1|1	2	1	2	4|1|0|0|0|0|3|0|0|0|2	0	-10.38	0.33	0.7
CG18746	CG5654	FBgn0022959	yps	38|47	85	42.5	2	2|0|7|18|22|0|34|0|3|2|7	0	-34.12	1.72	0.65
CG18746	CG31523	FBgn0051523	CG31523	1|1	2	1	2	2|1|1|0|0|1|0|2|1|1|0	0	-5.37	0.6	0.7
CG18746	CG8190	FBgn0034029	eIF2Bgamma	3|4	7	3.5	2	0|0|0|0|2|0|0|0|0|0|0	0.74	0.71	5.25	0.03
CG18746	CG3180	FBgn0262955	RpII140	2|0	2	1	2	0|0|0|7|9|0|2|0|0|0|2	0	-25.76	0.17	0.64
CG18746	CG3228	FBgn0001330	kz	0|3	3	1.5	2	0|0|0|0|0|0|0|0|0|0|0	0.5	-1.34	15	0.12
CG18746	CG4904	FBgn0250843	Prosalpha6	2|0	2	1	2	2|0|1|7|8|0|7|0|0|0|5	0	-31.97	0.14	0.7
CG18746	CG3595	FBgn0003514	sqh	8|6	14	7	2	14|2|8|4|1|2|8|2|0|0|7	0	-28.08	0.7	0.65
CG18746	CG3594	FBgn0035063	CG3594	1|1	2	1	2	0|0|0|0|0|0|0|0|0|0|0	0	1.17	10	0.7
CG18746	CG4901	FBgn0032194	CG4901	2|0	2	1	2	0|0|0|0|0|0|0|0|0|0|0	0.48	-1.34	10	0.17
CG18746	CG34085	FBgn0262952	mt:ND4	0|3	3	1.5	2	0|0|0|0|0|0|0|0|0|0|0	0.5	-1.34	15	0.12
CG18746	CG10578	FBgn0263106	DnaJ-1	7|10	17	8.5	2	2|0|5|5|2|0|3|0|2|3|0	0.06	-6.09	1.96	0.38
CG18746	CG12333	FBgn0038617	CG12333	2|0	2	1	2	0|0|0|1|2|0|0|0|0|0|0	0.09	-4.37	1	0.36
CG18746	CG3917	FBgn0026430	Grip84	2|0	2	1	2	0|0|0|0|0|0|0|0|0|0|0	0.48	-1.34	10	0.17
CG18746	CG18001	FBgn0040007	RpL38	3|4	7	3.5	2	8|0|3|8|8|8|8|7|4|3|6	0	-26.23	0.44	0.7
CG18746	CG11901	FBgn0029176	eEF1gamma	18|14	32	16	2	15|5|23|36|29|7|41|7|18|6|23	0	-112.78	0.45	0.7
CG18746	CG43140	FBgn0262614	pyd	2|0	2	1	2	0|0|0|20|17|0|0|0|0|0|2	0	-56.29	0.08	0.7
CG18746	CG12703	FBgn0031069	Pmp70	3|1	4	2	2	0|0|0|0|0|0|0|0|0|0|0	0.5	1.17	20	0.12
CG18746	CG3918	FBgn0029873	CG3918	3|5	8	4	2	0|0|0|0|0|0|0|0|0|0|0	1	5.04	40	0
CG18746	CG5320	FBgn0001098	Gdh	0|2	2	1	2	0|0|0|0|0|0|0|0|0|0|0	0.48	-1.34	10	0.17
CG18746	CG18009	FBgn0261793	Trf2	2|0	2	1	2	0|0|0|0|0|0|0|0|0|0|0	0.48	-1.34	10	0.17
CG18746	CG10849	FBgn0035471	Sc2	5|4	9	4.5	2	4|0|5|3|1|2|0|2|5|2|0	0	-11.56	0.96	0.56
CG18746	CG14407	FBgn0030584	CG14407	1|1	2	1	2	0|0|0|1|1|0|0|0|0|0|0	0	-1.77	1.5	0.7
CG18746	CG4170	FBgn0024183	vig	0|2	2	1	2	0|0|0|1|2|0|4|0|0|0|0	0	-10.06	0.43	0.49
CG18746	CG9171	FBgn0031738	CG9171	0|2	2	1	2	0|0|0|0|0|0|0|0|0|0|0	0.48	-1.34	10	0.17
CG18746	CG33522	FBgn0261872	scaf6	3|11	14	7	2	0|0|0|4|3|0|3|0|0|0|3	0.45	-8.3	2.1	0.27
CG18746	CG9888	FBgn0003062	Fib	64|70	134	67	2	5|0|10|44|33|5|111|2|5|4|14	0	-127.36	1.07	0.69
CG18746	CG10844	FBgn0011286	RyR	3|1	4	2	2	0|0|0|0|0|0|0|0|0|0|0	0.5	1.17	20	0.12
CG18746	CG1092	FBgn0037228	CG1092	4|3	7	3.5	2	0|0|0|3|2|2|0|0|3|4|0	0	-8.3	1.05	0.5
CG18746	CG10241	FBgn0015714	Cyp6a17	2|0	2	1	2	0|0|0|0|0|0|0|0|0|0|0	0.48	-1.34	10	0.17
CG18746	CG14792	FBgn0003517	sta	5|11	16	8	2	8|2|10|12|4|7|8|6|5|6|7	0	-30.01	0.8	0.64
CG18746	CG4771	FBgn0263143	vret	3|1	4	2	2	0|0|0|8|8|0|0|0|0|0|0	0	-19.5	0.38	0.61
CG18746	CG2064	FBgn0033205	CG2064	10|6	16	8	2	13|1|15|10|11|5|13|6|2|2|9	0	-42.57	0.59	0.67
CG18746	CG2065	FBgn0033204	CG2065	5|4	9	4.5	2	0|0|0|4|5|0|4|0|0|0|3	0	-10.37	1.04	0.54
CG18746	CG32452	FBgn0052452	CG32452	0|2	2	1	2	0|0|0|0|0|0|0|0|0|0|0	0.48	-1.34	10	0.17
CG18746	CG8722	FBgn0033247	Nup44A	7|5	12	6	2	0|0|0|15|11|0|4|0|0|0|2	0	-29.55	0.6	0.65
CG18746	CG7580	FBgn0036728	UQCR-Q	3|3	6	3	2	4|0|2|0|0|5|0|3|0|0|2	0	-10.63	0.75	0.56
CG18746	CG7581	FBgn0025457	Bub3	5|2	7	3.5	2	4|0|3|5|7|0|3|0|0|0|5	0	-19.02	0.62	0.6
CG18746	CG14815	FBgn0023516	Pex5	2|0	2	1	2	0|0|0|0|0|0|0|0|0|0|0	0.48	-1.34	10	0.17
CG18746	CG7583	FBgn0020496	CtBP	1|1	2	1	2	6|3|2|0|0|0|7|0|0|0|1	0	-20.05	0.19	0.7
CG18746	CG6721	FBgn0004390	RasGAP1	0|4	4	2	2	0|0|0|0|0|0|0|0|0|0|0	0.5	-1.34	20	0.1
CG18746	CG3821	FBgn0002069	AspRS	10|9	19	9.5	2	2|2|4|6|7|0|8|0|0|0|5	0	-12.54	1.36	0.57
CG18746	CG3820	FBgn0010660	Nup214	2|0	2	1	2	1|0|2|2|0|0|6|0|0|0|1	0	-14.26	0.3	0.56
CG18746	CG10122	FBgn0019938	RpI1	5|4	9	4.5	2	0|0|0|0|0|0|0|0|0|0|0	1	6.79	45	0
CG18746	CG1621	FBgn0263240	Coop	2|1	3	1.5	2	0|0|0|0|0|0|0|0|0|0|0	0.48	1.17	15	0.17
CG18746	CG2260	FBgn0030000	CG2260	7|5	12	6	2	0|0|0|0|0|0|0|0|0|0|0	1	8.47	60	0
CG18746	CG5371	FBgn0011703	RnrL	1|3	4	2	2	0|0|0|6|3|0|2|0|0|0|1	0	-13.16	0.55	0.56
CG18746	CG12141	FBgn0027084	LysRS	8|3	11	5.5	2	3|2|2|9|8|0|12|0|0|0|9	0	-34.45	0.55	0.65
CG18746	CG31038	FBgn0051038	CG31038	0|4	4	2	2	0|0|0|0|0|0|0|0|0|0|0	0.5	-1.34	20	0.1
CG18746	CG5374	FBgn0003676	CCT1	7|6	13	6.5	2	5|0|6|18|14|3|18|4|4|3|12	0	-54.79	0.39	0.7
CG18746	CG18005	FBgn0037660	beag	4|9	13	6.5	2	0|0|0|2|2|0|4|0|0|0|0	0.44	-4.51	2.44	0.27
CG18746	CG5378	FBgn0028688	Rpn7	2|2	4	2	2	4|0|2|4|6|2|9|0|0|0|3	0	-21.73	0.32	0.7
CG18746	CG9423	FBgn0027338	Kap-alpha3	8|8	16	8	2	5|1|5|11|7|4|6|3|4|6|5	0	-17.49	1	0.62
CG18746	CG9035	FBgn0021795	Tapdelta	3|3	6	3	2	2|1|2|4|3|3|3|2|2|2|2	0	-8.3	0.9	0.52
CG18746	CG9424	FBgn0037719	bocks	6|6	12	6	2	48|3|49|0|0|0|19|0|0|0|6	0	-147.45	0.16	0.7
CG18746	CG7601	FBgn0027583	CG7601	0|3	3	1.5	2	0|0|0|0|0|0|0|0|3|2|0	0.04	-7.26	0.9	0.39
CG18746	CG8728	FBgn0033235	CG8728	5|6	11	5.5	2	3|1|3|6|6|0|7|0|0|0|4	0	-16.01	0.87	0.6
CG18746	CG13345	FBgn0086356	tum	5|6	11	5.5	2	2|0|6|0|2|0|0|0|0|0|0	0.01	-5.31	1.65	0.43
CG18746	CG3961	FBgn0036821	CG3961	3|0	3	1.5	2	0|0|0|0|0|0|0|0|0|0|0	0.5	-1.34	15	0.12
CG18746	CG5505	FBgn0260936	scny	0|2	2	1	2	0|0|0|3|3|0|5|0|0|0|0	0	-15.84	0.27	0.58
CG18746	CG5271	FBgn0003942	RpS27A	1|1	2	1	2	0|0|0|0|0|0|1|0|0|0|1	0	-1.77	1.5	0.7
CG18746	CG17257	FBgn0031495	GABPI	3|0	3	1.5	2	0|0|0|0|0|0|0|0|0|0|0	0.5	-1.34	15	0.12
CG18746	CG12792	FBgn0022288	l(2)09851	3|4	7	3.5	2	0|0|0|8|5|0|4|0|0|0|0	0	-16.96	0.62	0.61
CG18746	CG4016	FBgn0086532	Spt-I	6|5	11	5.5	2	0|0|0|2|1|0|0|0|3|2|0	0.23	-2	2.36	0.33
CG18746	CG5277	FBgn0025366	Ip259	4|4	8	4	2	0|0|0|0|0|0|2|0|0|0|0	0.82	1.5	6	0.02
CG18746	CG6743	FBgn0027868	Nup107	2|2	4	2	2	3|0|1|15|13|0|2|0|0|0|2	0	-37.93	0.19	0.7
CG18746	CG5787	FBgn0032454	CG5787	20|38	58	29	2	3|1|1|7|7|0|54|0|0|0|2	0	-50.26	1.28	0.66
CG18746	CG33898	FBgn0053898	His2B:CG33898	1|1	2	1	2	0|0|0|0|0|0|3|0|0|0|0	0	-2.53	1	0.7
CG18746	CG5837	FBgn0011771	Hem	1|2	3	1.5	2	0|0|0|0|0|0|0|0|0|0|0	0.48	1.17	15	0.17
CG18746	CG8625	FBgn0011604	Iswi	4|0	4	2	2	0|0|0|0|0|0|0|0|0|0|2	0.41	-3.51	3	0.28
CG18746	CG33894	FBgn0053894	His2B:CG33894	1|1	2	1	2	0|0|0|0|0|0|3|0|0|0|0	0	-2.53	1	0.7
CG18746	CG8922	FBgn0002590	RpS5a	1|2	3	1.5	2	0|0|0|0|0|1|1|1|0|0|1	0.09	-2.97	1.5	0.36
[truncated: 11,074 more rows]
