# Supplementary material for: Comparative interactome analysis of α-arrestin families in human and Drosophila
Source: eLife. 2024 Jan 25;12:RP88328. doi: 10.7554/eLife.88328 (PMC10945707; doi:10.7554/eLife.88328)
Supplement: Supplementary file 4. — Summary of protein domains and short-linear motifs annotated in the interactome of each α-arrestin for human (A, B) and Drosophila (D, E). Annotated interactions between the short-linear motifs in α-arrestins and protein domains in the interactomes from the ELM database are also summarized for human (C) and Drosophila (F). [file elife-88328-supp4.xlsx]

## Sheet: A. Human alpha arresint ELM
Bait	ELM_motif	Functionalsite	Descriptin
ARRDC4	DOC_CKS1_1	Cks1 ligand	Phospho-dependent motif that mediates docking of CDK substrates and regulators to cyclin-CDK-bound Cks1.
ARRDC4	DOC_PP2A_B56_1	PP2A holoenzyme B56-docking site	Docking site required for the regulatory subunit B56 of PP2A for protein dephosphorylation.
ARRDC4	DOC_PP2B_LxvP_1	Calcineurin (PP2B)-docking motif LxvP	Docking motif in calcineurin substrates that binds at the interface of the catalytic CNA and regulatory CNB subunits.
ARRDC4	DOC_USP7_UBL2_3	USP7 binding motif	The USP7 CTD domain binding motif variant based on the ICP0 and DNMT1 interactions
ARRDC4	LIG_14-3-3_CanoR_1	14-3-3 binding phosphopeptide motif	Canonical Arg-containing phospho-motif mediating a strong interaction with 14-3-3 proteins.
ARRDC4	LIG_EVH1_1	EVH1 ligands	Proline-rich motif binding to signal transduction class I EVH1 domains.
ARRDC4	LIG_FHA_1	FHA phosphopeptide ligands	Phosphothreonine motif binding a subset of FHA domains that show a preference for a large aliphatic amino acid at the pT+3 position.
ARRDC4	LIG_FHA_2	FHA phosphopeptide ligands	Phosphothreonine motif binding a subset of FHA domains that have a preference for an acidic amino acid at the pT+3 position.
ARRDC4	LIG_LIR_Gen_1	Atg8 protein family ligands	Canonical LIR motif that binds to Atg8 protein family members to mediate processes involved in autophagy.
ARRDC4	LIG_PDZ_Class_2	PDZ ligands	The C-terminal class 2 PDZ-binding motif is classically represented by a pattern such as (VYF)X(VIL)*
ARRDC4	LIG_SH2_SRC	SH2 ligand	Src-family Src Homology 2 (SH2) domains binding motif.
ARRDC4	LIG_SH3_1	SH3 ligand	This is the motif recognized by class I SH3 domains
ARRDC4	LIG_SUMO_SIM_par_1	SUMO interaction site	Motif for the parallel beta augmentation mode of non-covalent binding to SUMO protein.
ARRDC4	LIG_TRAF2_1	TRAF2 binding site	Major TRAF2-binding consensus motif. Members of the tumor necrosis factor receptor (TNFR) superfamily initiate intracellular signaling by recruiting the C-domain of the TNFR-associated factors (TRAFs) through their cytoplasmic tails.
ARRDC4	LIG_WW_1	WW domain ligands	PPXY is the motif recognized by WW domains of Group I
ARRDC4	MOD_CDK_SPxxK_3	CDK Phosphorylation Site	Longer version of the CDK phosphorylation site which shows specificity towards a lysine/arginine residue at position +4 after the phospho-Ser/Thr
ARRDC4	MOD_N-GLC_1	N-glycosylation site	Generic motif for N-glycosylation. It was shown that Trp, Asp, and Glu are uncommon before the Ser/Thr position. Efficient glycosylation usually occurs when ~60 residues or more separate the glycosylation acceptor site from the C-terminus.
ARRDC4	MOD_NEK2_1	NEK2 phosphorylation site	NEK2 phosphorylation motif with preferred Phe, Leu or Met in the -3 position to compensate for less favorable residues in the +1 and +2 position.
ARRDC4	MOD_NMyristoyl	N-myristoylation site	Generic motif for N-Myristoylation site.
ARRDC4	MOD_PIKK_1	PIKK phosphorylation site	(ST)Q motif which is phosphorylated by PIKK family members.
ARRDC4	MOD_PK_1	PK Phosphorylation site	Phosphorylase kinase phosphorylation site
ARRDC4	MOD_PKA_2	PKA Phosphorylation site	Secondary preference for PKA-type AGC kinase phosphorylation.
ARRDC4	MOD_Plk_1	Polo-like kinase phosphosites	Ser/Thr residue phosphorylated by the Plk1 kinase
ARRDC4	MOD_Plk_2-3	Polo-like kinase phosphosites	Ser/Thr residue phosphorylated by Plk2 and Plk3
ARRDC4	MOD_Plk_4	Polo-like kinase phosphosites	Ser/Thr residue phosphorylated by Plk4
ARRDC4	TRG_ENDOCYTIC_2	Y-based sorting signal	Tyrosine-based sorting signal responsible for the interaction with mu subunit of AP (Adaptor Protein) complex
ARRDC5	DOC_CKS1_1	Cks1 ligand	Phospho-dependent motif that mediates docking of CDK substrates and regulators to cyclin-CDK-bound Cks1.
ARRDC5	LIG_PTB_Apo_2	PTB ligand	These phosphorylation-independent motifs bind to Dab-like PTB domains. Binding is not driven by contacts at the 0 or FY position, but instead is dependent upon the large number of hydrophobic and hydrogen bond contacts between motif and domain.
ARRDC5	MOD_N-GLC_2	N-glycosylation site	Atipical motif for N-glycosylation site. Examples are Human CD69, which is uniquely glycosylated at typical (Asn-X-Ser/Thr) and atypical (Asn-X-Cys) motifs, beta protein C
ARRDC5	MOD_Plk_4	Polo-like kinase phosphosites	Ser/Thr residue phosphorylated by Plk4
ARRDC1	DEG_SPOP_SBC_1	SPOP SBC docking motif	The S/T rich motif known as the SPOP-binding consensus (SBC) of the MATH-BTB protein, SPOP, is present in substrates that undergo SPOP/Cul3-dependant ubiquitination.
ARRDC1	DOC_PP2B_LxvP_1	Calcineurin (PP2B)-docking motif LxvP	Docking motif in calcineurin substrates that binds at the interface of the catalytic CNA and regulatory CNB subunits.
ARRDC1	DOC_USP7_MATH_2	USP7 binding motif	The USP7 MATH domain binding motif variant based on the EBV EBNA1 interaction.
ARRDC1	DOC_USP7_UBL2_3	USP7 binding motif	The USP7 CTD domain binding motif variant based on the ICP0 and DNMT1 interactions
ARRDC1	LIG_FHA_1	FHA phosphopeptide ligands	Phosphothreonine motif binding a subset of FHA domains that show a preference for a large aliphatic amino acid at the pT+3 position.
ARRDC1	LIG_IRF3_LxIS_1	IRF-3 binding site	A binding site for IRF-3 protein present in various innate adaptor proteins and the viral protein NSP1to trigger the innate immune responsive pathways
ARRDC1	LIG_LIR_Gen_1	Atg8 protein family ligands	Canonical LIR motif that binds to Atg8 protein family members to mediate processes involved in autophagy.
ARRDC1	LIG_MYND_1	MYND domain binding motif.	PxLxP motif is recognized by a subset of MYND domain containing proteins.
ARRDC1	LIG_Pex14_1	Pex14 ligand motif	Wxxx[FY] motifs present in N-terminal half of Pex5 bind to Pex13 and Pex14 at peroxisomal and glycosomal membranes to facilitate entrance of PTS1 cargo proteins into the organellar lumen.
ARRDC1	LIG_PTAP_UEV_1	UEV Domain binding PTAP motif	PTAP motif binds the N-terminal UEV domain of Tsg101.
ARRDC1	LIG_SH2_STAT5	SH2 ligand	STAT5 Src Homology 2 (SH2) domain binding motif.
ARRDC1	LIG_SUMO_SIM_par_1	SUMO interaction site	Motif for the parallel beta augmentation mode of non-covalent binding to SUMO protein.
ARRDC1	LIG_TRAF2_1	TRAF2 binding site	Major TRAF2-binding consensus motif. Members of the tumor necrosis factor receptor (TNFR) superfamily initiate intracellular signaling by recruiting the C-domain of the TNFR-associated factors (TRAFs) through their cytoplasmic tails.
ARRDC1	LIG_TRAF6	TRAF6 binding site	TRAF6 binding site. Members of the tumor necrosis factor receptor (TNFR) superfamily initiate intracellular signaling by recruiting the C-domain of the TNFR-associated factors (TRAFs) through their cytoplasmatic tails.
ARRDC1	LIG_WW_1	WW domain ligands	PPXY is the motif recognized by WW domains of Group I
ARRDC1	MOD_CDK_SPK_2	CDK Phosphorylation Site	Short version of the CDK phosphorylation site which shows specificity towards a lysine/arginine residue at the [ST] +2 position.
ARRDC1	MOD_NEK2_1	NEK2 phosphorylation site	NEK2 phosphorylation motif with preferred Phe, Leu or Met in the -3 position to compensate for less favorable residues in the +1 and +2 position.
ARRDC1	MOD_PIKK_1	PIKK phosphorylation site	(ST)Q motif which is phosphorylated by PIKK family members.
ARRDC1	MOD_PKA_1	PKA Phosphorylation site	Main preference for PKA-type AGC kinase phosphorylation.
ARRDC1	MOD_Plk_1	Polo-like kinase phosphosites	Ser/Thr residue phosphorylated by the Plk1 kinase
ARRDC1	MOD_Plk_4	Polo-like kinase phosphosites	Ser/Thr residue phosphorylated by Plk4
ARRDC1	TRG_ENDOCYTIC_2	Y-based sorting signal	Tyrosine-based sorting signal responsible for the interaction with mu subunit of AP (Adaptor Protein) complex
ARRDC1	TRG_LysEnd_APsAcLL_1	Endosome-Lysosome-Basolateral sorting signals	Sorting and internalisation signal found in the cytoplasmic juxta-membrane region of type I transmembrane proteins. Targets them from the Trans Golgi Network to the lysosomal-endosomal-melanosomal compartments. Interacts with adaptor protein (AP) complexes
ARRDC2	CLV_PCSK_SKI1_1	PCSK cleavage site	Subtilisin/kexin isozyme-1 (SKI1) cleavage site ([RK]-X-[hydrophobic]-[LTKF]-|-X).
ARRDC2	DEG_Nend_Nbox_1	N-degron	N-terminal motif that initiates protein degradation by binding to the N-box of N-recognins. This N-degron variant comprises N-terminal a bulky hydrophobic residue as destabilizing residue.
ARRDC2	DOC_PP2A_B56_1	PP2A holoenzyme B56-docking site	Docking site required for the regulatory subunit B56 of PP2A for protein dephosphorylation.
ARRDC2	DOC_PP2B_LxvP_1	Calcineurin (PP2B)-docking motif LxvP	Docking motif in calcineurin substrates that binds at the interface of the catalytic CNA and regulatory CNB subunits.
ARRDC2	LIG_14-3-3_CanoR_1	14-3-3 binding phosphopeptide motif	Canonical Arg-containing phospho-motif mediating a strong interaction with 14-3-3 proteins.
ARRDC2	LIG_14-3-3_CterR_2	14-3-3 binding phosphopeptide motif	C-terminal Arg-containing phospho-motif mediating a strong interaction with 14-3-3 proteins.
ARRDC2	LIG_LIR_Gen_1	Atg8 protein family ligands	Canonical LIR motif that binds to Atg8 protein family members to mediate processes involved in autophagy.
ARRDC2	LIG_Pex14_2	Pex14 ligand motif	Fxxx[WF] motifs are present in Pex19 and S. cerevisiae Pex5 cytosolic receptors that bind to peroxisomal membrane docking member, Pex14
ARRDC2	LIG_SH2_STAT5	SH2 ligand	STAT5 Src Homology 2 (SH2) domain binding motif.
ARRDC2	LIG_TRAF6	TRAF6 binding site	TRAF6 binding site. Members of the tumor necrosis factor receptor (TNFR) superfamily initiate intracellular signaling by recruiting the C-domain of the TNFR-associated factors (TRAFs) through their cytoplasmatic tails.
ARRDC2	LIG_WW_1	WW domain ligands	PPXY is the motif recognized by WW domains of Group I
ARRDC2	MOD_PK_1	PK Phosphorylation site	Phosphorylase kinase phosphorylation site
ARRDC2	MOD_PKA_2	PKA Phosphorylation site	Secondary preference for PKA-type AGC kinase phosphorylation.
ARRDC2	MOD_Plk_1	Polo-like kinase phosphosites	Ser/Thr residue phosphorylated by the Plk1 kinase
ARRDC2	MOD_Plk_4	Polo-like kinase phosphosites	Ser/Thr residue phosphorylated by Plk4
ARRDC2	TRG_ENDOCYTIC_2	Y-based sorting signal	Tyrosine-based sorting signal responsible for the interaction with mu subunit of AP (Adaptor Protein) complex
ARRDC2	TRG_ER_diArg_1	di Arginine retention/retrieving signal	The di-Arg ER retention motif is defined by two consecutive arginine residues (RR) or with a single residue insertion (RXR). The motif is completed by an adjacent hydrophobic/arginine residue which may be on either side of the Arg pair.
ARRDC2	TRG_LysEnd_APsAcLL_1	Endosome-Lysosome-Basolateral sorting signals	Sorting and internalisation signal found in the cytoplasmic juxta-membrane region of type I transmembrane proteins. Targets them from the Trans Golgi Network to the lysosomal-endosomal-melanosomal compartments. Interacts with adaptor protein (AP) complexes
ARRDC3	CLV_NRD_NRD_1	NRD cleavage site	N-Arg dibasic convertase (NRD/Nardilysin) cleavage site (X-|-R-K or R-|-R-X).
ARRDC3	DEG_APCC_DBOX_1	APCC-binding Destruction motifs	An RxxL-based motif that binds to the Cdh1 and Cdc20 components of APC/C thereby targeting the protein for destruction in a cell cycle dependent manner
ARRDC3	DOC_PP2A_B56_1	PP2A holoenzyme B56-docking site	Docking site required for the regulatory subunit B56 of PP2A for protein dephosphorylation.
ARRDC3	DOC_PP2B_LxvP_1	Calcineurin (PP2B)-docking motif LxvP	Docking motif in calcineurin substrates that binds at the interface of the catalytic CNA and regulatory CNB subunits.
ARRDC3	LIG_14-3-3_CanoR_1	14-3-3 binding phosphopeptide motif	Canonical Arg-containing phospho-motif mediating a strong interaction with 14-3-3 proteins.
ARRDC3	LIG_FHA_1	FHA phosphopeptide ligands	Phosphothreonine motif binding a subset of FHA domains that show a preference for a large aliphatic amino acid at the pT+3 position.
ARRDC3	LIG_LIR_Gen_1	Atg8 protein family ligands	Canonical LIR motif that binds to Atg8 protein family members to mediate processes involved in autophagy.
ARRDC3	LIG_SH2_SRC	SH2 ligand	Src-family Src Homology 2 (SH2) domains binding motif.
ARRDC3	LIG_SH2_STAT5	SH2 ligand	STAT5 Src Homology 2 (SH2) domain binding motif.
ARRDC3	LIG_SH3_2	SH3 ligand	This is the motif recognized by class II SH3 domains
ARRDC3	LIG_TRAF2_2	TRAF2 binding site	Minor TRAF2-binding consensus motif. Members of the tumor necrosis factor receptor (TNFR) superfamily initiate intracellular signaling by recruiting the C-domain of the TNFR-associated factors (TRAFs) through their cytoplasmic tails.
ARRDC3	LIG_WW_1	WW domain ligands	PPXY is the motif recognized by WW domains of Group I
ARRDC3	MOD_NEK2_1	NEK2 phosphorylation site	NEK2 phosphorylation motif with preferred Phe, Leu or Met in the -3 position to compensate for less favorable residues in the +1 and +2 position.
ARRDC3	MOD_PIKK_1	PIKK phosphorylation site	(ST)Q motif which is phosphorylated by PIKK family members.
ARRDC3	MOD_PK_1	PK Phosphorylation site	Phosphorylase kinase phosphorylation site
ARRDC3	MOD_PKA_2	PKA Phosphorylation site	Secondary preference for PKA-type AGC kinase phosphorylation.
ARRDC3	MOD_Plk_1	Polo-like kinase phosphosites	Ser/Thr residue phosphorylated by the Plk1 kinase
ARRDC3	MOD_Plk_2-3	Polo-like kinase phosphosites	Ser/Thr residue phosphorylated by Plk2 and Plk3
ARRDC3	TRG_ENDOCYTIC_2	Y-based sorting signal	Tyrosine-based sorting signal responsible for the interaction with mu subunit of AP (Adaptor Protein) complex
TXNIP	CLV_C14_Caspase3-7	Caspase cleavage motif	Caspase-3 and Caspase-7 cleavage site.
TXNIP	CLV_PCSK_SKI1_1	PCSK cleavage site	Subtilisin/kexin isozyme-1 (SKI1) cleavage site ([RK]-X-[hydrophobic]-[LTKF]-|-X).
TXNIP	DOC_CKS1_1	Cks1 ligand	Phospho-dependent motif that mediates docking of CDK substrates and regulators to cyclin-CDK-bound Cks1.
TXNIP	DOC_MAPK_gen_1	MAPK docking motifs	MAPK interacting molecules (e.g. MAPKKs, substrates, phosphatases) carry docking motif that help to regulate specific interaction in the MAPK cascade. The classic motif approximates (R/K)xxxx#x# where # is a hydrophobic residue.
TXNIP	DOC_PP2A_B56_1	PP2A holoenzyme B56-docking site	Docking site required for the regulatory subunit B56 of PP2A for protein dephosphorylation.
TXNIP	DOC_PP2B_LxvP_1	Calcineurin (PP2B)-docking motif LxvP	Docking motif in calcineurin substrates that binds at the interface of the catalytic CNA and regulatory CNB subunits.
TXNIP	DOC_USP7_UBL2_3	USP7 binding motif	The USP7 CTD domain binding motif variant based on the ICP0 and DNMT1 interactions
TXNIP	LIG_14-3-3_CanoR_1	14-3-3 binding phosphopeptide motif	Canonical Arg-containing phospho-motif mediating a strong interaction with 14-3-3 proteins.
TXNIP	LIG_BRCT_BRCA1_1	BRCT phosphopeptide ligands	Phosphopeptide motif which directly interacts with the BRCT (carboxy-terminal) domain of the Breast Cancer Gene BRCA1 with low affinity
TXNIP	LIG_FHA_1	FHA phosphopeptide ligands	Phosphothreonine motif binding a subset of FHA domains that show a preference for a large aliphatic amino acid at the pT+3 position.
TXNIP	LIG_FHA_2	FHA phosphopeptide ligands	Phosphothreonine motif binding a subset of FHA domains that have a preference for an acidic amino acid at the pT+3 position.
TXNIP	LIG_LIR_Gen_1	Atg8 protein family ligands	Canonical LIR motif that binds to Atg8 protein family members to mediate processes involved in autophagy.
TXNIP	LIG_SH2_STAT5	SH2 ligand	STAT5 Src Homology 2 (SH2) domain binding motif.
TXNIP	LIG_UBA3_1	Binding motif for UBA3 adenylation domain	UBA3 adenylation domain binding motif variant based on the UBE2M and UBE2F interactions.
TXNIP	LIG_WW_1	WW domain ligands	PPXY is the motif recognized by WW domains of Group I
TXNIP	MOD_PIKK_1	PIKK phosphorylation site	(ST)Q motif which is phosphorylated by PIKK family members.
TXNIP	MOD_PKA_1	PKA Phosphorylation site	Main preference for PKA-type AGC kinase phosphorylation.
TXNIP	MOD_PKA_2	PKA Phosphorylation site	Secondary preference for PKA-type AGC kinase phosphorylation.
TXNIP	MOD_Plk_1	Polo-like kinase phosphosites	Ser/Thr residue phosphorylated by the Plk1 kinase
TXNIP	MOD_Plk_4	Polo-like kinase phosphosites	Ser/Thr residue phosphorylated by Plk4
TXNIP	MOD_SUMO_for_1	Sumoylation site	Motif recognised for modification by SUMO-1
TXNIP	TRG_ENDOCYTIC_2	Y-based sorting signal	Tyrosine-based sorting signal responsible for the interaction with mu subunit of AP (Adaptor Protein) complex

## Sheet: B. Human prey Pfam
Prey	Pfam domain(s)	Pfam domain name(s)
FGFRL1	PF07679	I-set
WWP2	PF00632,PF00397,PF00168	HECT,WW,C2
NCBP1	PF02854,PF09088,PF09090	MIF4G,MIF4G_like,MIF4G_like_2
WWP1	PF00168,PF00632,PF00397	C2,HECT,WW
HUWE1	PF14377,PF06012,PF06025,PF00632,PF00627,PF02825	DUF4414,DUF908,DUF913,HECT,UBA,WWE
CPD	PF00246	Peptidase_M14
SETD1A	PF11764,PF00076,PF00856	N-SET,RRM_1,SET
MFAP1	PF06991	MFAP1
SMAD5	PF03165,PF03166	MH1,MH2
ANKIB1	PF00023,PF01485,PF12796,PF00097	Ank,IBR,Ank_2,zf-C3HC4
CWC27	PF00160	Pro_isomerase
RBM15B	PF00076,PF07744	RRM_1,SPOC
SNRNP200	PF00270,PF00271,PF02889	DEAD,Helicase_C,Sec63
SGPL1	PF00282	Pyridoxal_deC
SUGT1	PF04969,PF05002	CS,SGS
ADAMTS1	PF05986,PF01562,PF01421,PF00090	ADAM_spacer1,Pep_M12B_propep,Reprolysin,TSP_1
LARP1	PF05383	La
STUB1	PF04564	U-box
FMNL3	PF06367,PF06371,PF02181	Drf_FH3,Drf_GBD,FH2
ASH2L	PF00622	SPRY
ATP6AP1	PF05827	ATP-synt_S1
PELO	PF03463,PF03464,PF03465	eRF1_1,eRF1_2,eRF1_3
CUL9	PF03256,PF11515,PF00888,PF01485,PF10557	ANAPC10,Cul7,Cullin,IBR,Cullin_Nedd8
SAP18	PF06487	SAP18
SLC12A2	PF00324,PF08403,PF03522	AA_permease,AA_permease_N,SLC12
DYRK1A	PF00069	Pkinase
ZC3H18	PF00642	zf-CCCH
ABCD3	PF06472,PF00005	ABC_membrane_2,ABC_tran
CUL7	PF03256,PF11515,PF00888	ANAPC10,Cul7,Cullin
SLIT2	PF00008,PF12661,PF00054,PF13855,PF01463,PF01462	EGF,hEGF,Laminin_G_1,LRR_8,LRRCT,LRRNT
ZMYM2	PF12012,PF06467	DUF3504,zf-FCS
WDR6	PF00400	WD40
UBL4A	PF00240	ubiquitin
C2CD5	PF00168	C2
CAMK2D	PF08332,PF00069	CaMKII_AD,Pkinase
EPB41L4B	PF08736,PF09380,PF00373,PF09379	FA,FERM_C,FERM_M,FERM_N
TRIM26	PF13765,PF00622,PF00643	PRY,SPRY,zf-B_box
CAMK2G	PF08332,PF00069	CaMKII_AD,Pkinase
IK	PF07807,PF07808	RED_C,RED_N
EPHA2	PF14575,PF01404,PF00041,PF07714,PF00536	EphA2_TM,Ephrin_lbd,fn3,Pkinase_Tyr,SAM_1
MON2	PF16213,PF09324,PF16206,PF12783,PF00895	DCB,DUF1981,Mon2_C,Sec7_N,ATP-synt_8
CHERP	PF04818,PF01585,PF01805	CTD_bind,G-patch,Surp
GPATCH8	PF01585,PF12171	G-patch,zf-C2H2_jaz
FIP1L1	PF05182	Fip1
DEPDC1B	PF00610,PF00620	DEP,RhoGAP
CACNA2D1	PF08473,PF00092,PF08399	VGCC_alpha2,VWA,VWA_N
CSNK2A2	PF00069	Pkinase
CSNK2A1	PF00069	Pkinase
UBR4	PF13764,PF02207	E3_UbLigase_R4,zf-UBR
FLOT2	PF01145,PF15975	Band_7,Flot
LMTK2	PF07714	Pkinase_Tyr
PDXDC1	PF00282	Pyridoxal_deC
PTPN13	PF09380,PF00373,PF09379,PF00595,PF00102,PF16474	FERM_C,FERM_M,FERM_N,PDZ,Y_phosphatase,KIND
TRIM3	PF00630,PF01436,PF00643,PF13445	Filamin,NHL,zf-B_box,zf-RING_UBOX
MAGED2	PF01454	MAGE
MAGED4	PF01454	MAGE
RBBP6	PF08783,PF04564,PF13696	DWNN,U-box,zf-CCHC_2
SLC2A1	PF00083	Sugar_tr
SPEN	PF00076,PF07744	RRM_1,SPOC
UTRN	PF00307,PF09068,PF09069,PF00435,PF00397,PF00569	CH,EF-hand_2,EF-hand_3,Spectrin,WW,ZZ
CCNT1	PF00134	Cyclin_N
MYO5A	PF01843,PF00612,PF00063	DIL,IQ,Myosin_head
COPB2	PF04053,PF00400	Coatomer_WDAD,WD40
CEP78	PF13516	LRR_6
KDM5C	PF01388,PF02373,PF02375,PF00628,PF08429,PF02928	ARID,JmjC,JmjN,PHD,PLU-1,zf-C5HC2
TSG101	PF05743,PF09454	UEV,Vps23_core
ATP6V1F	PF01990	ATP-synt_F
ATP6V1A	PF00006,PF02874,PF16886	ATP-synt_ab,ATP-synt_ab_N,ATP-synt_ab_Xtn
CTNND1	PF00514	Arm
PAXBP1	PF07842	GCFC
RBBP7	PF12265,PF00400	CAF1C_H4-bd,WD40
GPATCH1	PF07713,PF01585	DUF1604,G-patch
ATP6V1H	PF11698	V-ATPase_H_C
TFIP11	PF01585,PF07842,PF12457	G-patch,GCFC,TIP_N
GTF3C3	PF13181	TPR_8
HECW2	PF00168,PF00632,PF16562,PF00397	C2,HECT,HECW_N,WW
GTF3C1	PF04182	B-block_TFIIIC
CNTN1	PF00041,PF07679	fn3,I-set
MYADM	PF01284	MARVEL
DHX30	PF00270,PF04408,PF00271,PF07717	DEAD,HA2,Helicase_C,OB_NTP_bind
LAMB2	PF00053,PF00055	Laminin_EGF,Laminin_N
MMS19	PF12460	MMS19_C
RNPS1	PF00076	RRM_1
PLXNB2	PF08337,PF01437,PF01403,PF01833	Plexin_cytopl,PSI,Sema,TIG
POLD1	PF00136,PF03104,PF14260	DNA_pol_B,DNA_pol_B_exo1,zf-C4pol
SRSF7	PF00076,PF00098	RRM_1,zf-CCHC
SRSF1	PF00076	RRM_1
RUVBL2	PF06068	TIP49
TUBA1C	PF00091,PF03953	Tubulin,Tubulin_C
UBE3C	PF00632	HECT
DDX50	PF00270,PF08152,PF00271	DEAD,GUCT,Helicase_C
U2AF2	PF00076	RRM_1
SF3A3	PF11931,PF16837,PF12108	DUF3449,SF3A3,SF3a60_bindingd
NID1	PF12662,PF12947,PF07645,PF07474,PF00058,PF06119,PF00086	cEGF,EGF_3,EGF_CA,G2F,Ldl_recept_b,NIDO,Thyroglobulin_1
TFRC	PF02225,PF04389,PF04253	PA,Peptidase_M28,TFR_dimer
HTRA2	PF13180	PDZ_2
NF1	PF13716,PF00616	CRAL_TRIO_2,RasGAP
JAK1	PF07714	Pkinase_Tyr
PJA1	PF13639	zf-RING_2
PJA2	PF13639	zf-RING_2
PKN3	PF02185,PF00069,PF00433	HR1,Pkinase,Pkinase_C
CDK5	PF00069	Pkinase
PDLIM5	PF15936,PF00412,PF00595	DUF4749,LIM,PDZ
MAP1B	PF00414	MAP1B_neuraxin
FARP2	PF08736,PF09380,PF00373,PF09379,PF00169,PF00621	FA,FERM_C,FERM_M,FERM_N,PH,RhoGEF
XPOT	PF03810,PF08389	IBN_N,Xpo1
CWF19L1	PF04677,PF04676	CwfJ_C_1,CwfJ_C_2
USP5	PF00627,PF00443,PF02148	UBA,UCH,zf-UBP
MLLT11	PF15017	WRNPLPNID
HERC2	PF03256,PF11515,PF00173,PF00632,PF06701,PF00415,PF00569	ANAPC10,Cul7,Cyt-b5,HECT,MIB_HERC2,RCC1,ZZ
POLR2A	PF04997,PF00623,PF04983,PF05000,PF04998,PF04992,PF04990,PF05001	RNA_pol_Rpb1_1,RNA_pol_Rpb1_2,RNA_pol_Rpb1_3,RNA_pol_Rpb1_4,RNA_pol_Rpb1_5,RNA_pol_Rpb1_6,RNA_pol_Rpb1_7,RNA_pol_Rpb1_R
PAPD7	PF01909,PF03828	NTP_transf_2,PAP_assoc
SART3	PF05391,PF00076	Lsm_interact,RRM_1
SART1	PF03343	SART-1
LAMC1	PF00052,PF00053,PF00055	Laminin_B,Laminin_EGF,Laminin_N
GET4	PF04190	DUF410
TUBGCP2	PF04130	Spc97_Spc98
PEX1	PF00004,PF09262,PF09263	AAA,PEX-1N,PEX-2N
SSSCA1	PF06677	Auto_anti-p27
ABCG2	PF01061,PF00005	ABC2_membrane,ABC_tran
TP53	PF00870,PF08563,PF07710	P53,P53_TAD,P53_tetramer
ERLIN1	PF01145	Band_7
ERLIN2	PF01145	Band_7
GNAS	PF00503,PF06390	G-alpha,NESP55
MCM5	PF00493,PF14551,PF17207	MCM,MCM_N,MCM_OB
PSMD13	PF01399	PCI
FMNL2	PF06367,PF06371,PF02181	Drf_FH3,Drf_GBD,FH2
DTNA	PF09068,PF09069,PF00569	EF-hand_2,EF-hand_3,ZZ
WDR36	PF12894,PF04192,PF00400	ANAPC4_WD40,Utp21,WD40
BAT3	PF12057,PF00240	DUF3538,ubiquitin
ATP6V0A1	PF01496	V_ATPase_I
RBCK1	PF01485,PF13445	IBR,zf-RING_UBOX
IPO9	PF03810	IBN_N
IPO4	PF02985,PF03810	HEAT,IBN_N
FLNC	PF00307,PF00630	CH,Filamin
TRIM5	PF00622,PF00643,PF13445	SPRY,zf-B_box,zf-RING_UBOX
TRIM4	PF00622,PF00643	SPRY,zf-B_box
EIF4A3	PF00270,PF00271	DEAD,Helicase_C
RHOBTB3	PF00651,PF00071	BTB,Ras
HDAC2	PF00850	Hist_deacetyl
BAG6	PF12057,PF00240	DUF3538,ubiquitin
RAB11FIP5	PF00168,PF09457	C2,RBD-FIP
PI4KA	PF00454,PF00613	PI3_PI4_kinase,PI3Ka
ANKRD13A	PF12796,PF11904	Ank_2,GPCR_chapero_1
ARHGEF2	PF00621,PF00130	RhoGEF,C1_1
MYO1E	PF00063,PF06017,PF00018	Myosin_head,Myosin_TH1,SH3_1
MYO1D	PF00612,PF00063,PF06017	IQ,Myosin_head,Myosin_TH1
SDCBP	PF00595	PDZ
MYO1B	PF00612,PF00063,PF06017	IQ,Myosin_head,Myosin_TH1
SLC2A11	PF00083	Sugar_tr
BCLAF1	PF15440,PF09405	THRAP3_BCLAF1,Btz
NPHP3	PF13176	TPR_7
STOM	PF01145	Band_7
TNIK	PF00780,PF00069	CNH,Pkinase
FANCD2	PF14631	FancD2
MIOS	PF17034	zinc_ribbon_16
DMD	PF00307,PF09068,PF09069,PF00435,PF00397,PF00569	CH,EF-hand_2,EF-hand_3,Spectrin,WW,ZZ
WDHD1	PF12894,PF12341,PF00400	ANAPC4_WD40,Mcl1_mid,WD40
TSC2	PF11864,PF02145,PF03542	DUF3384,Rap_GAP,Tuberin
BCR	PF09036,PF00168,PF00620,PF00621	Bcr-Abl_Oligo,C2,RhoGAP,RhoGEF
MAP4K4	PF00780,PF00069	CNH,Pkinase
KCMF1	PF05605,PF00569	zf-Di19,ZZ
ECD	PF07093	SGT1
SLC25A17	PF00153	Mito_carr
FAM91A1	PF14648,PF14647	FAM91_C,FAM91_N
POLDIP2	PF04379,PF08755	DUF525,YccV-like
SNTB2	PF00595	PDZ
SMC2	PF06470,PF02463	SMC_hinge,SMC_N
NEDD4	PF00632,PF00397,PF00168	HECT,WW,C2
SMC4	PF06470,PF02463	SMC_hinge,SMC_N
PRPF40A	PF01846,PF00397	FF,WW
MCCC2	PF01039	Carboxyl_trans
PSMA3	PF00227,PF10584	Proteasome,Proteasome_A_N
NDFIP1	PF10176	DUF2370
RANBP9	PF10607,PF08513,PF00622	CLTH,LisH,SPRY
RBM15	PF00076,PF07744	RRM_1,SPOC
INPP5F	PF12456,PF02383,PF09446	hSac2,Syja_N,VMA21
DSG2	PF00028	Cadherin
RBM17	PF01585,PF00076	G-patch,RRM_1
FANCI	PF14679,PF14680,PF14675,PF14674,PF14676,PF14677,PF14678	FANCI_HD1,FANCI_HD2,FANCI_S1,FANCI_S1-cap,FANCI_S2,FANCI_S3,FANCI_S4
PLPP1	PF01569	PAP2
KIF16B	PF00498,PF00225,PF00787	FHA,Kinesin,PX
KLHL12	PF07707,PF00651,PF01344	BACK,BTB,Kelch_1
SNW1	PF02731	SKIP_SNW
LAMA5	PF00052,PF00053,PF02210,PF06008,PF06009,PF00055	Laminin_B,Laminin_EGF,Laminin_G_2,Laminin_I,Laminin_II,Laminin_N
THRAP3	PF15440	THRAP3_BCLAF1
KIDINS220	PF12796,PF07693,PF00023	Ank_2,KAP_NTPase,Ank
DOCK7	PF06920,PF14429,PF11878	DHR-2,DOCK-C2,DUF3398
SERPINH1	PF00079	Serpin
DDX20	PF00270,PF00271	DEAD,Helicase_C
PRKAR1A	PF00027,PF02197	cNMP_binding,RIIa
ARFGEF3	PF16213,PF09324	DCB,DUF1981
ATP6V0D1	PF01992	vATP-synt_AC39
RAB9A	PF00071	Ras
ZNF638	PF00076,PF12171	RRM_1,zf-C2H2_jaz
CFAP20	PF05018	DUF667
LLGL1	PF08366,PF00400	LLGL,WD40
VPS39	PF00780,PF10366,PF10367	CNH,Vps39_1,Vps39_2
ATP6V1E1	PF01991	vATP-synt_E
STOML2	PF01145,PF16200	Band_7,Band_7_C
SMU1	PF00400	WD40
PARD3	PF12053,PF00595	DUF3534,PDZ
TBC1D9B	PF02893,PF00566	GRAM,RabGAP-TBC
ABCA3	PF00005	ABC_tran
WDR34	PF00400	WD40
CDK9	PF00069	Pkinase
PSMB5	PF00227	Proteasome
PSMB3	PF00227	Proteasome
PSMB2	PF00227	Proteasome
AMOT	PF12240	Angiomotin_C
CLPX	PF07724,PF10431	AAA_2,ClpB_D2-small
DDX28	PF00270,PF00271	DEAD,Helicase_C
SVIL	PF00626,PF02209	Gelsolin,VHP
PSMD8	PF10075	CSN8_PSD8_EIF3K
ITCH	PF00168,PF00632,PF00397	C2,HECT,WW
ATP6V0C	PF00137	ATP-synt_C
PSMD4	PF02809,PF13519	UIM,VWA_2
AAR2	PF05282	AAR2
PSMD1	PF01851	PC_rep
EPB41L3	PF05902,PF08736,PF09380,PF00373,PF09379,PF04382	4_1_CTD,FA,FERM_C,FERM_M,FERM_N,SAB
PSMD3	PF01399,PF08375	PCI,Rpn3_C
PSMD2	PF01851	PC_rep
BMPR1A	PF01064,PF07714,PF08515	Activin_recp,Pkinase_Tyr,TGF_beta_GS
USP9X	PF00443	UCH
ATP11C	PF16212,PF16209	PhoLip_ATPase_C,PhoLip_ATPase_N
ATP11B	PF16212,PF16209	PhoLip_ATPase_C,PhoLip_ATPase_N
WDR82	PF00400	WD40
CHAF1B	PF15512,PF00400	CAF-1_p60_C,WD40
CPSF3	PF10996,PF11718,PF00753,PF07521,PF16661	Beta-Casp,CPSF73-100_C,Lactamase_B,RMMBL,Lactamase_B_6
LAMA1	PF00052,PF00053,PF00054,PF06008,PF06009,PF00055	Laminin_B,Laminin_EGF,Laminin_G_1,Laminin_I,Laminin_II,Laminin_N
CPSF1	PF03178	CPSF_A
CAD	PF01979,PF02786,PF02787,PF00988,PF00117,PF02142,PF00185,PF02729	Amidohydro_1,CPSase_L_D2,CPSase_L_D3,CPSase_sm_chain,GATase,MGS,OTCace,OTCace_N
WDR33	PF00400	WD40
CAND2	PF08623	TIP120
HCFC1	PF01344	Kelch_1
NEDD4L	PF00168,PF00632,PF00397	C2,HECT,WW
ATM	PF02259,PF02260,PF00454,PF11640	FAT,FATC,PI3_PI4_kinase,TAN
PMPCB	PF00675,PF05193	Peptidase_M16,Peptidase_M16_C
HADHA	PF00725,PF02737,PF00378	3HCDH,3HCDH_N,ECH_1
DDX52	PF00270,PF00271	DEAD,Helicase_C
NEURL4	PF07177	Neuralized
ESYT2	PF00168,PF17047	C2,SMP_LBD
LTN1	PF13639	zf-RING_2
ABCB1	PF00664,PF00005	ABC_membrane,ABC_tran
ZCCHC8	PF04046,PF00098	PSP,zf-CCHC
IQGAP2	PF00307,PF00612,PF00616,PF03836	CH,IQ,RasGAP,RasGAP_C
DNAJC10	PF00226,PF00085	DnaJ,Thioredoxin
TRIM25	PF13765,PF00622,PF13445	PRY,SPRY,zf-RING_UBOX
ZCCHC2	PF00098	zf-CCHC
ATP6V1B2	PF00006,PF02874	ATP-synt_ab,ATP-synt_ab_N
RNF31	PF16678,PF01485,PF09409	HOIP-UBA,IBR,PUB
RLIM	PF13639,PF00658	zf-RING_2,PABP
PSMC5	PF00004	AAA
LRP10	PF00431,PF00057	CUB,Ldl_recept_a
SMURF1	PF00168,PF00632,PF00397	C2,HECT,WW
LRP12	PF00431,PF00057	CUB,Ldl_recept_a
COPA	PF12894,PF04053,PF06957,PF00400	ANAPC4_WD40,Coatomer_WDAD,COPI_C,WD40
ATP6V0A2	PF01496	V_ATPase_I
MTR	PF02310,PF02607,PF02965,PF00809,PF02574	B12-binding,B12-binding_2,Met_synt_B12,Pterin_bind,S-methyl_trans
TLDC1	PF07534	TLD
NOLC1	PF05022	SRP40_C
IARS2	PF08264,PF00133,PF06827	Anticodon_1,tRNA-synt_1,zf-FPG_IleRS
U2SURP	PF08312,PF00076,PF01805	cwf21,RRM_1,Surp
MCM7	PF00493,PF14551,PF17207	MCM,MCM_N,MCM_OB
ABR	PF00168,PF00169,PF00620,PF00621	C2,PH,RhoGAP,RhoGEF
USP11	PF06337,PF14836,PF00443,PF14533	DUSP,Ubiquitin_3,UCH,USP7_C2
MCM3	PF00493,PF14551,PF17207	MCM,MCM_N,MCM_OB
PPP6R3	PF04499	SAPS
TTC37	PF13181,PF08238	TPR_8,Sel1
GTPBP2	PF00009	GTP_EFTU
RUVBL1	PF06068	TIP49
NRP1	PF00431,PF11980,PF00754,PF00629	CUB,DUF3481,F5_F8_type_C,MAM
CPSF2	PF10996,PF13299,PF16661,PF07521	Beta-Casp,CPSF100_C,Lactamase_B_6,RMMBL
SLC20A1	PF01384	PHO4
PTPRS	PF00041,PF07679,PF00102	fn3,I-set,Y_phosphatase
PMPCA	PF00675,PF05193	Peptidase_M16,Peptidase_M16_C
ENDOD1	PF01223	Endonuclease_NS
LPIN1	PF16876,PF04571,PF08235	Lipin_mid,Lipin_N,LNS2
MYO6	PF16521,PF00063	Myosin-VI_CBD,Myosin_head
VPS11	PF00637,PF12451	Clathrin,VPS11_C
SCRIB	PF13855,PF00595	LRR_8,PDZ
PTPRF	PF00041,PF07679,PF00102	fn3,I-set,Y_phosphatase
HADHB	PF02803,PF00108	Thiolase_C,Thiolase_N
PNN	PF04696,PF04697	Pinin_SDK_memA,Pinin_SDK_N
BIRC2	PF00653,PF00619	BIR,CARD
ATP6V1C1	PF03223	V-ATPase_C
WDR75	PF00400	WD40

## Sheet: C. Human motif-domain
Bait	ELM_motif_bait	FunctionSite	Description	Prey	PfamDomain_prey	Pfam_domain_prey_name
ARRDC4	LIG_FHA_1	FHA phosphopeptide ligands	Phosphothreonine motif binding a subset of FHA domains that show a preference for a large aliphatic amino acid at the pT+3 position.	KIF16B	PF00498	FHA
ARRDC4	LIG_FHA_2	FHA phosphopeptide ligands	Phosphothreonine motif binding a subset of FHA domains that have a preference for an acidic amino acid at the pT+3 position.	KIF16B	PF00498	FHA
ARRDC4	LIG_WW_1	WW domain ligands	PPXY is the motif recognized by WW domains of Group I	ITCH	PF00397	WW
ARRDC4	LIG_WW_1	WW domain ligands	PPXY is the motif recognized by WW domains of Group I	NEDD4L	PF00397	WW
ARRDC4	LIG_WW_1	WW domain ligands	PPXY is the motif recognized by WW domains of Group I	WWP1	PF00397	WW
ARRDC4	LIG_WW_1	WW domain ligands	PPXY is the motif recognized by WW domains of Group I	WWP2	PF00397	WW
ARRDC4	MOD_PIKK_1	PIKK phosphorylation site	(ST)Q motif which is phosphorylated by PIKK family members.	PI4KA	PF00454	PI3_PI4_kinase
ARRDC4	MOD_PIKK_1	PIKK phosphorylation site	(ST)Q motif which is phosphorylated by PIKK family members.	ATM	PF00454	PI3_PI4_kinase
ARRDC1	LIG_PTAP_UEV_1	UEV Domain binding PTAP motif	PTAP motif binds the N-terminal UEV domain of Tsg101.	TSG101	PF05743	UEV
ARRDC1	LIG_WW_1	WW domain ligands	PPXY is the motif recognized by WW domains of Group I	WWP2	PF00397	WW
ARRDC1	LIG_WW_1	WW domain ligands	PPXY is the motif recognized by WW domains of Group I	ITCH	PF00397	WW
ARRDC1	LIG_WW_1	WW domain ligands	PPXY is the motif recognized by WW domains of Group I	WWP1	PF00397	WW
ARRDC1	LIG_WW_1	WW domain ligands	PPXY is the motif recognized by WW domains of Group I	SMURF1	PF00397	WW
ARRDC1	LIG_WW_1	WW domain ligands	PPXY is the motif recognized by WW domains of Group I	NEDD4	PF00397	WW
ARRDC1	LIG_WW_1	WW domain ligands	PPXY is the motif recognized by WW domains of Group I	NEDD4L	PF00397	WW
ARRDC1	LIG_WW_1	WW domain ligands	PPXY is the motif recognized by WW domains of Group I	UTRN	PF00397	WW
ARRDC1	LIG_WW_1	WW domain ligands	PPXY is the motif recognized by WW domains of Group I	HECW2	PF00397	WW
ARRDC2	LIG_WW_1	WW domain ligands	PPXY is the motif recognized by WW domains of Group I	ITCH	PF00397	WW
ARRDC2	LIG_WW_1	WW domain ligands	PPXY is the motif recognized by WW domains of Group I	WWP1	PF00397	WW
ARRDC2	LIG_WW_1	WW domain ligands	PPXY is the motif recognized by WW domains of Group I	WWP2	PF00397	WW
ARRDC2	LIG_WW_1	WW domain ligands	PPXY is the motif recognized by WW domains of Group I	NEDD4L	PF00397	WW
ARRDC2	LIG_WW_1	WW domain ligands	PPXY is the motif recognized by WW domains of Group I	HECW2	PF00397	WW
ARRDC2	TRG_ER_diArg_1	di Arginine retention/retrieving signal	The di-Arg ER retention motif is defined by two consecutive arginine residues (RR) or with a single residue insertion (RXR). The motif is completed by an adjacent hydrophobic/arginine residue which may be on either side of the Arg pair.	WDR6	PF00400	WD40
ARRDC2	TRG_ER_diArg_1	di Arginine retention/retrieving signal	The di-Arg ER retention motif is defined by two consecutive arginine residues (RR) or with a single residue insertion (RXR). The motif is completed by an adjacent hydrophobic/arginine residue which may be on either side of the Arg pair.	SMU1	PF00400	WD40
ARRDC2	TRG_ER_diArg_1	di Arginine retention/retrieving signal	The di-Arg ER retention motif is defined by two consecutive arginine residues (RR) or with a single residue insertion (RXR). The motif is completed by an adjacent hydrophobic/arginine residue which may be on either side of the Arg pair.	LLGL1	PF00400	WD40
ARRDC3	DEG_APCC_DBOX_1	APCC-binding Destruction motifs	An RxxL-based motif that binds to the Cdh1 and Cdc20 components of APC/C thereby targeting the protein for destruction in a cell cycle dependent manner	COPB2	PF00400	WD40
ARRDC3	DEG_APCC_DBOX_1	APCC-binding Destruction motifs	An RxxL-based motif that binds to the Cdh1 and Cdc20 components of APC/C thereby targeting the protein for destruction in a cell cycle dependent manner	WDR34	PF00400	WD40
ARRDC3	DEG_APCC_DBOX_1	APCC-binding Destruction motifs	An RxxL-based motif that binds to the Cdh1 and Cdc20 components of APC/C thereby targeting the protein for destruction in a cell cycle dependent manner	WDR36	PF00400	WD40
ARRDC3	DEG_APCC_DBOX_1	APCC-binding Destruction motifs	An RxxL-based motif that binds to the Cdh1 and Cdc20 components of APC/C thereby targeting the protein for destruction in a cell cycle dependent manner	WDR33	PF00400	WD40
ARRDC3	DEG_APCC_DBOX_1	APCC-binding Destruction motifs	An RxxL-based motif that binds to the Cdh1 and Cdc20 components of APC/C thereby targeting the protein for destruction in a cell cycle dependent manner	LLGL1	PF00400	WD40
ARRDC3	DEG_APCC_DBOX_1	APCC-binding Destruction motifs	An RxxL-based motif that binds to the Cdh1 and Cdc20 components of APC/C thereby targeting the protein for destruction in a cell cycle dependent manner	SMU1	PF00400	WD40
ARRDC3	DEG_APCC_DBOX_1	APCC-binding Destruction motifs	An RxxL-based motif that binds to the Cdh1 and Cdc20 components of APC/C thereby targeting the protein for destruction in a cell cycle dependent manner	WDR6	PF00400	WD40
ARRDC3	DEG_APCC_DBOX_1	APCC-binding Destruction motifs	An RxxL-based motif that binds to the Cdh1 and Cdc20 components of APC/C thereby targeting the protein for destruction in a cell cycle dependent manner	WDR82	PF00400	WD40
ARRDC3	DEG_APCC_DBOX_1	APCC-binding Destruction motifs	An RxxL-based motif that binds to the Cdh1 and Cdc20 components of APC/C thereby targeting the protein for destruction in a cell cycle dependent manner	COPA	PF00400	WD40
ARRDC3	DEG_APCC_DBOX_1	APCC-binding Destruction motifs	An RxxL-based motif that binds to the Cdh1 and Cdc20 components of APC/C thereby targeting the protein for destruction in a cell cycle dependent manner	WDR75	PF00400	WD40
ARRDC3	LIG_SH3_2	SH3 ligand	This is the motif recognized by class II SH3 domains	MYO1E	PF00018	SH3_1
ARRDC3	LIG_WW_1	WW domain ligands	PPXY is the motif recognized by WW domains of Group I	WWP1	PF00397	WW
ARRDC3	LIG_WW_1	WW domain ligands	PPXY is the motif recognized by WW domains of Group I	UTRN	PF00397	WW
ARRDC3	LIG_WW_1	WW domain ligands	PPXY is the motif recognized by WW domains of Group I	DMD	PF00397	WW
ARRDC3	LIG_WW_1	WW domain ligands	PPXY is the motif recognized by WW domains of Group I	NEDD4	PF00397	WW
ARRDC3	LIG_WW_1	WW domain ligands	PPXY is the motif recognized by WW domains of Group I	PRPF40A	PF00397	WW
ARRDC3	LIG_WW_1	WW domain ligands	PPXY is the motif recognized by WW domains of Group I	ITCH	PF00397	WW
ARRDC3	LIG_WW_1	WW domain ligands	PPXY is the motif recognized by WW domains of Group I	NEDD4L	PF00397	WW
ARRDC3	MOD_NEK2_1	NEK2 phosphorylation site	NEK2 phosphorylation motif with preferred Phe, Leu or Met in the -3 position to compensate for less favorable residues in the +1 and +2 position.	DYRK1A	PF00069	Pkinase
ARRDC3	MOD_NEK2_1	NEK2 phosphorylation site	NEK2 phosphorylation motif with preferred Phe, Leu or Met in the -3 position to compensate for less favorable residues in the +1 and +2 position.	CAMK2D	PF00069	Pkinase
ARRDC3	MOD_NEK2_1	NEK2 phosphorylation site	NEK2 phosphorylation motif with preferred Phe, Leu or Met in the -3 position to compensate for less favorable residues in the +1 and +2 position.	CAMK2G	PF00069	Pkinase
ARRDC3	MOD_NEK2_1	NEK2 phosphorylation site	NEK2 phosphorylation motif with preferred Phe, Leu or Met in the -3 position to compensate for less favorable residues in the +1 and +2 position.	CSNK2A2	PF00069	Pkinase
ARRDC3	MOD_NEK2_1	NEK2 phosphorylation site	NEK2 phosphorylation motif with preferred Phe, Leu or Met in the -3 position to compensate for less favorable residues in the +1 and +2 position.	CSNK2A1	PF00069	Pkinase
ARRDC3	MOD_NEK2_1	NEK2 phosphorylation site	NEK2 phosphorylation motif with preferred Phe, Leu or Met in the -3 position to compensate for less favorable residues in the +1 and +2 position.	TNIK	PF00069	Pkinase
ARRDC3	MOD_NEK2_1	NEK2 phosphorylation site	NEK2 phosphorylation motif with preferred Phe, Leu or Met in the -3 position to compensate for less favorable residues in the +1 and +2 position.	CDK5	PF00069	Pkinase
ARRDC3	MOD_NEK2_1	NEK2 phosphorylation site	NEK2 phosphorylation motif with preferred Phe, Leu or Met in the -3 position to compensate for less favorable residues in the +1 and +2 position.	CDK9	PF00069	Pkinase
ARRDC3	MOD_NEK2_1	NEK2 phosphorylation site	NEK2 phosphorylation motif with preferred Phe, Leu or Met in the -3 position to compensate for less favorable residues in the +1 and +2 position.	MAP4K4	PF00069	Pkinase
ARRDC3	MOD_PIKK_1	PIKK phosphorylation site	(ST)Q motif which is phosphorylated by PIKK family members.	PI4KA	PF00454	PI3_PI4_kinase
ARRDC3	MOD_PK_1	PK Phosphorylation site	Phosphorylase kinase phosphorylation site	DYRK1A	PF00069	Pkinase
ARRDC3	MOD_PK_1	PK Phosphorylation site	Phosphorylase kinase phosphorylation site	CAMK2D	PF00069	Pkinase
ARRDC3	MOD_PK_1	PK Phosphorylation site	Phosphorylase kinase phosphorylation site	CAMK2G	PF00069	Pkinase
ARRDC3	MOD_PK_1	PK Phosphorylation site	Phosphorylase kinase phosphorylation site	CSNK2A2	PF00069	Pkinase
ARRDC3	MOD_PK_1	PK Phosphorylation site	Phosphorylase kinase phosphorylation site	CSNK2A1	PF00069	Pkinase
ARRDC3	MOD_PK_1	PK Phosphorylation site	Phosphorylase kinase phosphorylation site	TNIK	PF00069	Pkinase
ARRDC3	MOD_PK_1	PK Phosphorylation site	Phosphorylase kinase phosphorylation site	CDK5	PF00069	Pkinase
ARRDC3	MOD_PK_1	PK Phosphorylation site	Phosphorylase kinase phosphorylation site	CDK9	PF00069	Pkinase
ARRDC3	MOD_PK_1	PK Phosphorylation site	Phosphorylase kinase phosphorylation site	MAP4K4	PF00069	Pkinase
ARRDC3	MOD_PKA_2	PKA Phosphorylation site	Secondary preference for PKA-type AGC kinase phosphorylation.	DYRK1A	PF00069	Pkinase
ARRDC3	MOD_PKA_2	PKA Phosphorylation site	Secondary preference for PKA-type AGC kinase phosphorylation.	CAMK2D	PF00069	Pkinase
ARRDC3	MOD_PKA_2	PKA Phosphorylation site	Secondary preference for PKA-type AGC kinase phosphorylation.	CAMK2G	PF00069	Pkinase
ARRDC3	MOD_PKA_2	PKA Phosphorylation site	Secondary preference for PKA-type AGC kinase phosphorylation.	CSNK2A2	PF00069	Pkinase
ARRDC3	MOD_PKA_2	PKA Phosphorylation site	Secondary preference for PKA-type AGC kinase phosphorylation.	CSNK2A1	PF00069	Pkinase
ARRDC3	MOD_PKA_2	PKA Phosphorylation site	Secondary preference for PKA-type AGC kinase phosphorylation.	TNIK	PF00069	Pkinase
ARRDC3	MOD_PKA_2	PKA Phosphorylation site	Secondary preference for PKA-type AGC kinase phosphorylation.	CDK5	PF00069	Pkinase
ARRDC3	MOD_PKA_2	PKA Phosphorylation site	Secondary preference for PKA-type AGC kinase phosphorylation.	CDK9	PF00069	Pkinase
ARRDC3	MOD_PKA_2	PKA Phosphorylation site	Secondary preference for PKA-type AGC kinase phosphorylation.	MAP4K4	PF00069	Pkinase
TXNIP	DOC_MAPK_gen_1	MAPK docking motifs	MAPK interacting molecules (e.g. MAPKKs, substrates, phosphatases) carry docking motif that help to regulate specific interaction in the MAPK cascade. The classic motif approximates (R/K)xxxx#x# where # is a hydrophobic residue.	PKN3	PF00069	Pkinase
TXNIP	LIG_FHA_1	FHA phosphopeptide ligands	Phosphothreonine motif binding a subset of FHA domains that show a preference for a large aliphatic amino acid at the pT+3 position.	KIF16B	PF00498	FHA
TXNIP	LIG_FHA_2	FHA phosphopeptide ligands	Phosphothreonine motif binding a subset of FHA domains that have a preference for an acidic amino acid at the pT+3 position.	KIF16B	PF00498	FHA
TXNIP	LIG_WW_1	WW domain ligands	PPXY is the motif recognized by WW domains of Group I	ITCH	PF00397	WW
TXNIP	LIG_WW_1	WW domain ligands	PPXY is the motif recognized by WW domains of Group I	WWP1	PF00397	WW
TXNIP	LIG_WW_1	WW domain ligands	PPXY is the motif recognized by WW domains of Group I	WWP2	PF00397	WW
TXNIP	LIG_WW_1	WW domain ligands	PPXY is the motif recognized by WW domains of Group I	NEDD4L	PF00397	WW
TXNIP	MOD_PIKK_1	PIKK phosphorylation site	(ST)Q motif which is phosphorylated by PIKK family members.	PI4KA	PF00454	PI3_PI4_kinase
TXNIP	MOD_PKA_1	PKA Phosphorylation site	Main preference for PKA-type AGC kinase phosphorylation.	PKN3	PF00069	Pkinase
TXNIP	MOD_PKA_2	PKA Phosphorylation site	Secondary preference for PKA-type AGC kinase phosphorylation.	PKN3	PF00069	Pkinase

## Sheet: D. Fly alpha arresint ELM
Bait (Annotation Id)	Bait (Flybase ld)	Bait (Symbol)	ELM_motif	Functionalsite	Descriptin
CG18747	FBgn0042104	CG18747	CLV_C14_Caspase3-7	Caspase cleavage motif	Caspase-3 and Caspase-7 cleavage site.
CG18747	FBgn0042104	CG18747	CLV_NRD_NRD_1	NRD cleavage site	N-Arg dibasic convertase (NRD/Nardilysin) cleavage site (X-|-R-K or R-|-R-X).
CG18747	FBgn0042104	CG18747	DEG_SCF_FBW7_1	SCF ubiquitin ligase binding Phosphodegrons	The TPxxS phospho-dependent degron binds the FBW7 F box proteins of the SCF (Skp1_Cullin-Fbox) complex.
CG18747	FBgn0042104	CG18747	DOC_CKS1_1	Cks1 ligand	Phospho-dependent motif that mediates docking of CDK substrates and regulators to cyclin-CDK-bound Cks1.
CG18747	FBgn0042104	CG18747	LIG_14-3-3_CanoR_1	14-3-3 binding phosphopeptide motif	Canonical Arg-containing phospho-motif mediating a strong interaction with 14-3-3 proteins.
CG18747	FBgn0042104	CG18747	LIG_BRCT_BRCA1_1	BRCT phosphopeptide ligands	Phosphopeptide motif which directly interacts with the BRCT (carboxy-terminal) domain of the Breast Cancer Gene BRCA1 with low affinity
CG18747	FBgn0042104	CG18747	LIG_FHA_1	FHA phosphopeptide ligands	Phosphothreonine motif binding a subset of FHA domains that show a preference for a large aliphatic amino acid at the pT+3 position.
CG18747	FBgn0042104	CG18747	LIG_FHA_2	FHA phosphopeptide ligands	Phosphothreonine motif binding a subset of FHA domains that have a preference for an acidic amino acid at the pT+3 position.
CG18747	FBgn0042104	CG18747	LIG_LIR_Gen_1	Atg8 protein family ligands	Canonical LIR motif that binds to Atg8 protein family members to mediate processes involved in autophagy.
CG18747	FBgn0042104	CG18747	LIG_PTB_Apo_2	PTB ligand	These phosphorylation-independent motifs bind to Dab-like PTB domains. Binding is not driven by contacts at the 0 or FY position, but instead is dependent upon the large number of hydrophobic and hydrogen bond contacts between motif and domain.
CG18747	FBgn0042104	CG18747	LIG_SH2_SRC	SH2 ligand	Src-family Src Homology 2 (SH2) domains binding motif.
CG18747	FBgn0042104	CG18747	LIG_WW_3	WW domain ligands	WW domain of group III binding motif
CG18747	FBgn0042104	CG18747	MOD_N-GLC_1	N-glycosylation site	Generic motif for N-glycosylation. It was shown that Trp, Asp, and Glu are uncommon before the Ser/Thr position. Efficient glycosylation usually occurs when ~60 residues or more separate the glycosylation acceptor site from the C-terminus.
CG18747	FBgn0042104	CG18747	MOD_NEK2_1	NEK2 phosphorylation site	NEK2 phosphorylation motif with preferred Phe, Leu or Met in the -3 position to compensate for less favorable residues in the +1 and +2 position.
CG18747	FBgn0042104	CG18747	MOD_PIKK_1	PIKK phosphorylation site	(ST)Q motif which is phosphorylated by PIKK family members.
CG18747	FBgn0042104	CG18747	MOD_PKA_2	PKA Phosphorylation site	Secondary preference for PKA-type AGC kinase phosphorylation.
CG18747	FBgn0042104	CG18747	MOD_Plk_1	Polo-like kinase phosphosites	Ser/Thr residue phosphorylated by the Plk1 kinase
CG18747	FBgn0042104	CG18747	MOD_Plk_4	Polo-like kinase phosphosites	Ser/Thr residue phosphorylated by Plk4
CG18747	FBgn0042104	CG18747	TRG_ENDOCYTIC_2	Y-based sorting signal	Tyrosine-based sorting signal responsible for the interaction with mu subunit of AP (Adaptor Protein) complex
CG18747	FBgn0042104	CG18747	TRG_ER_diArg_1	di Arginine retention/retrieving signal	The di-Arg ER retention motif is defined by two consecutive arginine residues (RR) or with a single residue insertion (RXR). The motif is completed by an adjacent hydrophobic/arginine residue which may be on either side of the Arg pair.
CG18746	FBgn0042103	CG18746	CLV_NRD_NRD_1	NRD cleavage site	N-Arg dibasic convertase (NRD/Nardilysin) cleavage site (X-|-R-K or R-|-R-X).
CG18746	FBgn0042103	CG18746	DOC_MAPK_gen_1	MAPK docking motifs	MAPK interacting molecules (e.g. MAPKKs, substrates, phosphatases) carry docking motif that help to regulate specific interaction in the MAPK cascade. The classic motif approximates (R/K)xxxx#x# where # is a hydrophobic residue.
CG18746	FBgn0042103	CG18746	DOC_PP2B_LxvP_1	Calcineurin (PP2B)-docking motif LxvP	Docking motif in calcineurin substrates that binds at the interface of the catalytic CNA and regulatory CNB subunits.
CG18746	FBgn0042103	CG18746	DOC_USP7_UBL2_3	USP7 binding motif	The USP7 CTD domain binding motif variant based on the ICP0 and DNMT1 interactions
CG18746	FBgn0042103	CG18746	LIG_FHA_2	FHA phosphopeptide ligands	Phosphothreonine motif binding a subset of FHA domains that have a preference for an acidic amino acid at the pT+3 position.
CG18746	FBgn0042103	CG18746	LIG_LIR_Gen_1	Atg8 protein family ligands	Canonical LIR motif that binds to Atg8 protein family members to mediate processes involved in autophagy.
CG18746	FBgn0042103	CG18746	LIG_PDZ_Class_1	PDZ ligands	The C-terminal class 1 PDZ-binding motif is classically represented by a pattern like (ST)X(VIL)*
CG18746	FBgn0042103	CG18746	LIG_SH2_GRB2	SH2 ligand	GRB2-like Src Homology 2 (SH2) domains binding motif.
CG18746	FBgn0042103	CG18746	LIG_SH2_SRC	SH2 ligand	Src-family Src Homology 2 (SH2) domains binding motif.
CG18746	FBgn0042103	CG18746	LIG_SH2_STAT5	SH2 ligand	STAT5 Src Homology 2 (SH2) domain binding motif.
CG18746	FBgn0042103	CG18746	LIG_SUMO_SIM_par_1	SUMO interaction site	Motif for the parallel beta augmentation mode of non-covalent binding to SUMO protein.
CG18746	FBgn0042103	CG18746	LIG_TRAF2_2	TRAF2 binding site	Minor TRAF2-binding consensus motif. Members of the tumor necrosis factor receptor (TNFR) superfamily initiate intracellular signaling by recruiting the C-domain of the TNFR-associated factors (TRAFs) through their cytoplasmic tails.
CG18746	FBgn0042103	CG18746	LIG_WW_1	WW domain ligands	PPXY is the motif recognized by WW domains of Group I
CG18746	FBgn0042103	CG18746	MOD_NEK2_1	NEK2 phosphorylation site	NEK2 phosphorylation motif with preferred Phe, Leu or Met in the -3 position to compensate for less favorable residues in the +1 and +2 position.
CG18746	FBgn0042103	CG18746	MOD_PIKK_1	PIKK phosphorylation site	(ST)Q motif which is phosphorylated by PIKK family members.
CG18746	FBgn0042103	CG18746	MOD_PKA_1	PKA Phosphorylation site	Main preference for PKA-type AGC kinase phosphorylation.
CG18746	FBgn0042103	CG18746	MOD_Plk_1	Polo-like kinase phosphosites	Ser/Thr residue phosphorylated by the Plk1 kinase
CG18746	FBgn0042103	CG18746	MOD_Plk_4	Polo-like kinase phosphosites	Ser/Thr residue phosphorylated by Plk4
CG18746	FBgn0042103	CG18746	TRG_ENDOCYTIC_2	Y-based sorting signal	Tyrosine-based sorting signal responsible for the interaction with mu subunit of AP (Adaptor Protein) complex
CG18746	FBgn0042103	CG18746	TRG_NES_CRM1_1	NES Nuclear Export Signal	Some proteins re-exported from the nucleus contain a Leucine-rich nuclear export signal (NES) binding to the CRM1 exportin protein.
CG18746	FBgn0042103	CG18746	TRG_NLS_MonoExtN_4	NLS classical Nuclear Localization Signals	Monopartite variant of the classical basically charged NLS. N-extended version.
CG18745	FBgn0042102	CG18745	DEG_SPOP_SBC_1	SPOP SBC docking motif	The S/T rich motif known as the SPOP-binding consensus (SBC) of the MATH-BTB protein, SPOP, is present in substrates that undergo SPOP/Cul3-dependant ubiquitination.
CG18745	FBgn0042102	CG18745	DOC_CYCLIN_RxL_1	Cyclin docking motif	This motif is mainly based on cyclin A binding peptides and may not apply to all cyclins.
CG18745	FBgn0042102	CG18745	DOC_MAPK_DCC_7	MAPK docking motifs	A kinase docking motif mediating interaction towards the ERK1/2 and p38 subfamilies of MAP kinases
CG18745	FBgn0042102	CG18745	DOC_MAPK_MEF2A_6	MAPK docking motifs	A kinase docking motif that mediates interaction towards the ERK1/2 and p38 subfamilies of MAP kinases.
CG18745	FBgn0042102	CG18745	DOC_PP2B_LxvP_1	Calcineurin (PP2B)-docking motif LxvP	Docking motif in calcineurin substrates that binds at the interface of the catalytic CNA and regulatory CNB subunits.
CG18745	FBgn0042102	CG18745	LIG_FHA_1	FHA phosphopeptide ligands	Phosphothreonine motif binding a subset of FHA domains that show a preference for a large aliphatic amino acid at the pT+3 position.
CG18745	FBgn0042102	CG18745	LIG_FHA_2	FHA phosphopeptide ligands	Phosphothreonine motif binding a subset of FHA domains that have a preference for an acidic amino acid at the pT+3 position.
CG18745	FBgn0042102	CG18745	LIG_PDZ_Class_1	PDZ ligands	The C-terminal class 1 PDZ-binding motif is classically represented by a pattern like (ST)X(VIL)*
CG18745	FBgn0042102	CG18745	LIG_PTAP_UEV_1	UEV Domain binding PTAP motif	PTAP motif binds the N-terminal UEV domain of Tsg101.
CG18745	FBgn0042102	CG18745	LIG_SH2_SRC	SH2 ligand	Src-family Src Homology 2 (SH2) domains binding motif.
CG18745	FBgn0042102	CG18745	LIG_SH2_STAT5	SH2 ligand	STAT5 Src Homology 2 (SH2) domain binding motif.
CG18745	FBgn0042102	CG18745	LIG_SH3_5	SH3 ligand	PXXDY motif recognized by some SH3 domains
CG18745	FBgn0042102	CG18745	LIG_SUMO_SIM_par_1	SUMO interaction site	Motif for the parallel beta augmentation mode of non-covalent binding to SUMO protein.
CG18745	FBgn0042102	CG18745	LIG_TRAF2_1	TRAF2 binding site	Major TRAF2-binding consensus motif. Members of the tumor necrosis factor receptor (TNFR) superfamily initiate intracellular signaling by recruiting the C-domain of the TNFR-associated factors (TRAFs) through their cytoplasmic tails.
CG18745	FBgn0042102	CG18745	LIG_WW_1	WW domain ligands	PPXY is the motif recognized by WW domains of Group I
CG18745	FBgn0042102	CG18745	MOD_N-GLC_1	N-glycosylation site	Generic motif for N-glycosylation. It was shown that Trp, Asp, and Glu are uncommon before the Ser/Thr position. Efficient glycosylation usually occurs when ~60 residues or more separate the glycosylation acceptor site from the C-terminus.
CG18745	FBgn0042102	CG18745	MOD_NEK2_1	NEK2 phosphorylation site	NEK2 phosphorylation motif with preferred Phe, Leu or Met in the -3 position to compensate for less favorable residues in the +1 and +2 position.
CG18745	FBgn0042102	CG18745	MOD_PIKK_1	PIKK phosphorylation site	(ST)Q motif which is phosphorylated by PIKK family members.
CG18745	FBgn0042102	CG18745	MOD_PKA_2	PKA Phosphorylation site	Secondary preference for PKA-type AGC kinase phosphorylation.
CG18745	FBgn0042102	CG18745	MOD_Plk_1	Polo-like kinase phosphosites	Ser/Thr residue phosphorylated by the Plk1 kinase
CG18745	FBgn0042102	CG18745	TRG_ENDOCYTIC_2	Y-based sorting signal	Tyrosine-based sorting signal responsible for the interaction with mu subunit of AP (Adaptor Protein) complex
CG4674	FBgn0037856	Leash	DEG_Nend_UBRbox_2	N-degron	N-terminal motif that initiates protein degradation by binding to the UBR-box of N-recognins. This N-degron variant comprises N-terminal Asp or Glu as destabilizing residue.
CG4674	FBgn0037856	Leash	DEG_SPOP_SBC_1	SPOP SBC docking motif	The S/T rich motif known as the SPOP-binding consensus (SBC) of the MATH-BTB protein, SPOP, is present in substrates that undergo SPOP/Cul3-dependant ubiquitination.
CG4674	FBgn0037856	Leash	DOC_PP2B_LxvP_1	Calcineurin (PP2B)-docking motif LxvP	Docking motif in calcineurin substrates that binds at the interface of the catalytic CNA and regulatory CNB subunits.
CG4674	FBgn0037856	Leash	DOC_USP7_UBL2_3	USP7 binding motif	The USP7 CTD domain binding motif variant based on the ICP0 and DNMT1 interactions
CG4674	FBgn0037856	Leash	LIG_14-3-3_CanoR_1	14-3-3 binding phosphopeptide motif	Canonical Arg-containing phospho-motif mediating a strong interaction with 14-3-3 proteins.
CG4674	FBgn0037856	Leash	LIG_BRCT_BRCA1_1	BRCT phosphopeptide ligands	Phosphopeptide motif which directly interacts with the BRCT (carboxy-terminal) domain of the Breast Cancer Gene BRCA1 with low affinity
CG4674	FBgn0037856	Leash	LIG_eIF4E_1	eIF4E binding motif	Motif binding to the dorsal surface of eIF4E.
CG4674	FBgn0037856	Leash	LIG_FHA_1	FHA phosphopeptide ligands	Phosphothreonine motif binding a subset of FHA domains that show a preference for a large aliphatic amino acid at the pT+3 position.
CG4674	FBgn0037856	Leash	LIG_LIR_Gen_1	Atg8 protein family ligands	Canonical LIR motif that binds to Atg8 protein family members to mediate processes involved in autophagy.
CG4674	FBgn0037856	Leash	LIG_SH2_STAT5	SH2 ligand	STAT5 Src Homology 2 (SH2) domain binding motif.
CG4674	FBgn0037856	Leash	LIG_SH3_1	SH3 ligand	This is the motif recognized by class I SH3 domains
CG4674	FBgn0037856	Leash	LIG_SH3_2	SH3 ligand	This is the motif recognized by class II SH3 domains
CG4674	FBgn0037856	Leash	LIG_SUMO_SIM_par_1	SUMO interaction site	Motif for the parallel beta augmentation mode of non-covalent binding to SUMO protein.
CG4674	FBgn0037856	Leash	LIG_TRAF2_1	TRAF2 binding site	Major TRAF2-binding consensus motif. Members of the tumor necrosis factor receptor (TNFR) superfamily initiate intracellular signaling by recruiting the C-domain of the TNFR-associated factors (TRAFs) through their cytoplasmic tails.
CG4674	FBgn0037856	Leash	LIG_WW_1	WW domain ligands	PPXY is the motif recognized by WW domains of Group I
CG4674	FBgn0037856	Leash	LIG_WW_3	WW domain ligands	WW domain of group III binding motif
CG4674	FBgn0037856	Leash	MOD_CDK_SPK_2	CDK Phosphorylation Site	Short version of the CDK phosphorylation site which shows specificity towards a lysine/arginine residue at the [ST] +2 position.
CG4674	FBgn0037856	Leash	MOD_CDK_SPxxK_3	CDK Phosphorylation Site	Longer version of the CDK phosphorylation site which shows specificity towards a lysine/arginine residue at position +4 after the phospho-Ser/Thr
CG4674	FBgn0037856	Leash	MOD_NEK2_1	NEK2 phosphorylation site	NEK2 phosphorylation motif with preferred Phe, Leu or Met in the -3 position to compensate for less favorable residues in the +1 and +2 position.
CG4674	FBgn0037856	Leash	MOD_NEK2_2	NEK2 phosphorylation site	NEK2 phosphorylation motif with specific set of residues in the +1 and +2 position to compensate for less favorable residues in the -3 position.
CG4674	FBgn0037856	Leash	MOD_PIKK_1	PIKK phosphorylation site	(ST)Q motif which is phosphorylated by PIKK family members.
CG4674	FBgn0037856	Leash	MOD_PKA_2	PKA Phosphorylation site	Secondary preference for PKA-type AGC kinase phosphorylation.
CG4674	FBgn0037856	Leash	MOD_Plk_1	Polo-like kinase phosphosites	Ser/Thr residue phosphorylated by the Plk1 kinase
CG4674	FBgn0037856	Leash	MOD_Plk_4	Polo-like kinase phosphosites	Ser/Thr residue phosphorylated by Plk4
CG4674	FBgn0037856	Leash	TRG_ENDOCYTIC_2	Y-based sorting signal	Tyrosine-based sorting signal responsible for the interaction with mu subunit of AP (Adaptor Protein) complex
CG14696	FBgn0037853	CG14696	CLV_NRD_NRD_1	NRD cleavage site	N-Arg dibasic convertase (NRD/Nardilysin) cleavage site (X-|-R-K or R-|-R-X).
CG14696	FBgn0037853	CG14696	DEG_SPOP_SBC_1	SPOP SBC docking motif	The S/T rich motif known as the SPOP-binding consensus (SBC) of the MATH-BTB protein, SPOP, is present in substrates that undergo SPOP/Cul3-dependant ubiquitination.
CG14696	FBgn0037853	CG14696	DOC_CKS1_1	Cks1 ligand	Phospho-dependent motif that mediates docking of CDK substrates and regulators to cyclin-CDK-bound Cks1.
CG14696	FBgn0037853	CG14696	LIG_BRCT_BRCA1_1	BRCT phosphopeptide ligands	Phosphopeptide motif which directly interacts with the BRCT (carboxy-terminal) domain of the Breast Cancer Gene BRCA1 with low affinity
CG14696	FBgn0037853	CG14696	LIG_FHA_1	FHA phosphopeptide ligands	Phosphothreonine motif binding a subset of FHA domains that show a preference for a large aliphatic amino acid at the pT+3 position.
CG14696	FBgn0037853	CG14696	LIG_LIR_Gen_1	Atg8 protein family ligands	Canonical LIR motif that binds to Atg8 protein family members to mediate processes involved in autophagy.
CG14696	FBgn0037853	CG14696	LIG_MYND_1	MYND domain binding motif.	PxLxP motif is recognized by a subset of MYND domain containing proteins.
CG14696	FBgn0037853	CG14696	LIG_Pex14_1	Pex14 ligand motif	Wxxx[FY] motifs present in N-terminal half of Pex5 bind to Pex13 and Pex14 at peroxisomal and glycosomal membranes to facilitate entrance of PTS1 cargo proteins into the organellar lumen.
CG14696	FBgn0037853	CG14696	LIG_PTAP_UEV_1	UEV Domain binding PTAP motif	PTAP motif binds the N-terminal UEV domain of Tsg101.
CG14696	FBgn0037853	CG14696	LIG_SH2_STAT5	SH2 ligand	STAT5 Src Homology 2 (SH2) domain binding motif.
CG14696	FBgn0037853	CG14696	LIG_SH3_1	SH3 ligand	This is the motif recognized by class I SH3 domains
CG14696	FBgn0037853	CG14696	LIG_SH3_2	SH3 ligand	This is the motif recognized by class II SH3 domains
CG14696	FBgn0037853	CG14696	LIG_WW_1	WW domain ligands	PPXY is the motif recognized by WW domains of Group I
CG14696	FBgn0037853	CG14696	MOD_CDK_SPxK_1	CDK Phosphorylation Site	Canonical version of the CDK phosphorylation site which shows specificity towards a lysine/arginine residue at the [ST]+3 position.
CG14696	FBgn0037853	CG14696	MOD_N-GLC_1	N-glycosylation site	Generic motif for N-glycosylation. It was shown that Trp, Asp, and Glu are uncommon before the Ser/Thr position. Efficient glycosylation usually occurs when ~60 residues or more separate the glycosylation acceptor site from the C-terminus.
CG14696	FBgn0037853	CG14696	MOD_NEK2_1	NEK2 phosphorylation site	NEK2 phosphorylation motif with preferred Phe, Leu or Met in the -3 position to compensate for less favorable residues in the +1 and +2 position.
CG14696	FBgn0037853	CG14696	MOD_NEK2_2	NEK2 phosphorylation site	NEK2 phosphorylation motif with specific set of residues in the +1 and +2 position to compensate for less favorable residues in the -3 position.
CG14696	FBgn0037853	CG14696	MOD_PIKK_1	PIKK phosphorylation site	(ST)Q motif which is phosphorylated by PIKK family members.
CG14696	FBgn0037853	CG14696	MOD_Plk_4	Polo-like kinase phosphosites	Ser/Thr residue phosphorylated by Plk4
CG14696	FBgn0037853	CG14696	MOD_SUMO_for_1	Sumoylation site	Motif recognised for modification by SUMO-1
CG14696	FBgn0037853	CG14696	TRG_ER_diArg_1	di Arginine retention/retrieving signal	The di-Arg ER retention motif is defined by two consecutive arginine residues (RR) or with a single residue insertion (RXR). The motif is completed by an adjacent hydrophobic/arginine residue which may be on either side of the Arg pair.
CG2993	FBgn0037521	CG2993	CLV_C14_Caspase3-7	Caspase cleavage motif	Caspase-3 and Caspase-7 cleavage site.
CG2993	FBgn0037521	CG2993	CLV_NRD_NRD_1	NRD cleavage site	N-Arg dibasic convertase (NRD/Nardilysin) cleavage site (X-|-R-K or R-|-R-X).
CG2993	FBgn0037521	CG2993	DEG_APCC_DBOX_1	APCC-binding Destruction motifs	An RxxL-based motif that binds to the Cdh1 and Cdc20 components of APC/C thereby targeting the protein for destruction in a cell cycle dependent manner
CG2993	FBgn0037521	CG2993	DEG_SCF_FBW7_1	SCF ubiquitin ligase binding Phosphodegrons	The TPxxS phospho-dependent degron binds the FBW7 F box proteins of the SCF (Skp1_Cullin-Fbox) complex.
CG2993	FBgn0037521	CG2993	DEG_SPOP_SBC_1	SPOP SBC docking motif	The S/T rich motif known as the SPOP-binding consensus (SBC) of the MATH-BTB protein, SPOP, is present in substrates that undergo SPOP/Cul3-dependant ubiquitination.
CG2993	FBgn0037521	CG2993	DOC_CKS1_1	Cks1 ligand	Phospho-dependent motif that mediates docking of CDK substrates and regulators to cyclin-CDK-bound Cks1.
CG2993	FBgn0037521	CG2993	DOC_MAPK_gen_1	MAPK docking motifs	MAPK interacting molecules (e.g. MAPKKs, substrates, phosphatases) carry docking motif that help to regulate specific interaction in the MAPK cascade. The classic motif approximates (R/K)xxxx#x# where # is a hydrophobic residue.
CG2993	FBgn0037521	CG2993	DOC_MAPK_MEF2A_6	MAPK docking motifs	A kinase docking motif that mediates interaction towards the ERK1/2 and p38 subfamilies of MAP kinases.
CG2993	FBgn0037521	CG2993	DOC_PP2B_PxIxI_1	Calcineurin (PP2B)-docking motif PxIxI	Calcineurin substrate docking site, leads to the effective dephosphorylation of serine/threonine phosphorylation sites.
CG2993	FBgn0037521	CG2993	LIG_14-3-3_CanoR_1	14-3-3 binding phosphopeptide motif	Canonical Arg-containing phospho-motif mediating a strong interaction with 14-3-3 proteins.
CG2993	FBgn0037521	CG2993	LIG_BRCT_BRCA1_1	BRCT phosphopeptide ligands	Phosphopeptide motif which directly interacts with the BRCT (carboxy-terminal) domain of the Breast Cancer Gene BRCA1 with low affinity
CG2993	FBgn0037521	CG2993	LIG_FHA_1	FHA phosphopeptide ligands	Phosphothreonine motif binding a subset of FHA domains that show a preference for a large aliphatic amino acid at the pT+3 position.
CG2993	FBgn0037521	CG2993	LIG_FHA_2	FHA phosphopeptide ligands	Phosphothreonine motif binding a subset of FHA domains that have a preference for an acidic amino acid at the pT+3 position.
CG2993	FBgn0037521	CG2993	LIG_SH2_SRC	SH2 ligand	Src-family Src Homology 2 (SH2) domains binding motif.
CG2993	FBgn0037521	CG2993	LIG_SH2_STAT5	SH2 ligand	STAT5 Src Homology 2 (SH2) domain binding motif.
CG2993	FBgn0037521	CG2993	LIG_SH3_1	SH3 ligand	This is the motif recognized by class I SH3 domains
CG2993	FBgn0037521	CG2993	LIG_SUMO_SIM_par_1	SUMO interaction site	Motif for the parallel beta augmentation mode of non-covalent binding to SUMO protein.
CG2993	FBgn0037521	CG2993	LIG_WW_1	WW domain ligands	PPXY is the motif recognized by WW domains of Group I
CG2993	FBgn0037521	CG2993	MOD_N-GLC_1	N-glycosylation site	Generic motif for N-glycosylation. It was shown that Trp, Asp, and Glu are uncommon before the Ser/Thr position. Efficient glycosylation usually occurs when ~60 residues or more separate the glycosylation acceptor site from the C-terminus.
CG2993	FBgn0037521	CG2993	MOD_NEK2_1	NEK2 phosphorylation site	NEK2 phosphorylation motif with preferred Phe, Leu or Met in the -3 position to compensate for less favorable residues in the +1 and +2 position.
CG2993	FBgn0037521	CG2993	MOD_PIKK_1	PIKK phosphorylation site	(ST)Q motif which is phosphorylated by PIKK family members.
CG2993	FBgn0037521	CG2993	MOD_PKA_1	PKA Phosphorylation site	Main preference for PKA-type AGC kinase phosphorylation.
CG2993	FBgn0037521	CG2993	MOD_PKA_2	PKA Phosphorylation site	Secondary preference for PKA-type AGC kinase phosphorylation.
CG2993	FBgn0037521	CG2993	MOD_PKB_1	PKB Phosphorylation site	PKB Phosphorylation site
CG2993	FBgn0037521	CG2993	MOD_Plk_1	Polo-like kinase phosphosites	Ser/Thr residue phosphorylated by the Plk1 kinase
CG2993	FBgn0037521	CG2993	MOD_Plk_4	Polo-like kinase phosphosites	Ser/Thr residue phosphorylated by Plk4
CG2993	FBgn0037521	CG2993	TRG_ENDOCYTIC_2	Y-based sorting signal	Tyrosine-based sorting signal responsible for the interaction with mu subunit of AP (Adaptor Protein) complex
CG2993	FBgn0037521	CG2993	TRG_ER_diArg_1	di Arginine retention/retrieving signal	The di-Arg ER retention motif is defined by two consecutive arginine residues (RR) or with a single residue insertion (RXR). The motif is completed by an adjacent hydrophobic/arginine residue which may be on either side of the Arg pair.
CG1105	FBgn0037465	CG1105	DOC_MAPK_gen_1	MAPK docking motifs	MAPK interacting molecules (e.g. MAPKKs, substrates, phosphatases) carry docking motif that help to regulate specific interaction in the MAPK cascade. The classic motif approximates (R/K)xxxx#x# where # is a hydrophobic residue.
CG1105	FBgn0037465	CG1105	DOC_USP7_UBL2_3	USP7 binding motif	The USP7 CTD domain binding motif variant based on the ICP0 and DNMT1 interactions
CG1105	FBgn0037465	CG1105	LIG_EVH1_2	EVH1 ligands	Proline-rich motif binding to signal transduction class II EVH1 domains.
CG1105	FBgn0037465	CG1105	LIG_FHA_1	FHA phosphopeptide ligands	Phosphothreonine motif binding a subset of FHA domains that show a preference for a large aliphatic amino acid at the pT+3 position.
CG1105	FBgn0037465	CG1105	LIG_LIR_Gen_1	Atg8 protein family ligands	Canonical LIR motif that binds to Atg8 protein family members to mediate processes involved in autophagy.
CG1105	FBgn0037465	CG1105	LIG_LYPXL_S_1	LYPxL motif	The short version of the LYPxL motif binds the V-domain of Alix, a protein involved in endosomal sorting.
CG1105	FBgn0037465	CG1105	LIG_MYND_1	MYND domain binding motif.	PxLxP motif is recognized by a subset of MYND domain containing proteins.
CG1105	FBgn0037465	CG1105	LIG_SH2_GRB2	SH2 ligand	GRB2-like Src Homology 2 (SH2) domains binding motif.
CG1105	FBgn0037465	CG1105	LIG_TRAF2_2	TRAF2 binding site	Minor TRAF2-binding consensus motif. Members of the tumor necrosis factor receptor (TNFR) superfamily initiate intracellular signaling by recruiting the C-domain of the TNFR-associated factors (TRAFs) through their cytoplasmic tails.
CG1105	FBgn0037465	CG1105	MOD_N-GLC_1	N-glycosylation site	Generic motif for N-glycosylation. It was shown that Trp, Asp, and Glu are uncommon before the Ser/Thr position. Efficient glycosylation usually occurs when ~60 residues or more separate the glycosylation acceptor site from the C-terminus.
CG1105	FBgn0037465	CG1105	MOD_NEK2_1	NEK2 phosphorylation site	NEK2 phosphorylation motif with preferred Phe, Leu or Met in the -3 position to compensate for less favorable residues in the +1 and +2 position.
CG1105	FBgn0037465	CG1105	MOD_NEK2_2	NEK2 phosphorylation site	NEK2 phosphorylation motif with specific set of residues in the +1 and +2 position to compensate for less favorable residues in the -3 position.
CG1105	FBgn0037465	CG1105	MOD_PIKK_1	PIKK phosphorylation site	(ST)Q motif which is phosphorylated by PIKK family members.
CG1105	FBgn0037465	CG1105	MOD_Plk_1	Polo-like kinase phosphosites	Ser/Thr residue phosphorylated by the Plk1 kinase
CG1105	FBgn0037465	CG1105	MOD_Plk_4	Polo-like kinase phosphosites	Ser/Thr residue phosphorylated by Plk4
CG1105	FBgn0037465	CG1105	MOD_SUMO_for_1	Sumoylation site	Motif recognised for modification by SUMO-1
CG1105	FBgn0037465	CG1105	TRG_ENDOCYTIC_2	Y-based sorting signal	Tyrosine-based sorting signal responsible for the interaction with mu subunit of AP (Adaptor Protein) complex
CG7047	FBgn0035103	Vdup1	CLV_NRD_NRD_1	NRD cleavage site	N-Arg dibasic convertase (NRD/Nardilysin) cleavage site (X-|-R-K or R-|-R-X).
CG7047	FBgn0035103	Vdup1	LIG_FHA_1	FHA phosphopeptide ligands	Phosphothreonine motif binding a subset of FHA domains that show a preference for a large aliphatic amino acid at the pT+3 position.
CG7047	FBgn0035103	Vdup1	LIG_FHA_2	FHA phosphopeptide ligands	Phosphothreonine motif binding a subset of FHA domains that have a preference for an acidic amino acid at the pT+3 position.
CG7047	FBgn0035103	Vdup1	LIG_PDZ_Class_2	PDZ ligands	The C-terminal class 2 PDZ-binding motif is classically represented by a pattern such as (VYF)X(VIL)*
CG7047	FBgn0035103	Vdup1	LIG_WRPW_2	WRPW motif	The WRPW motif mediates recruitment of transcriptional co-repressors of the Groucho/transducin-like enhancer-of-split (TLE) family. LIG_WRPW_2 is not restricted to the C-terminus (in contrast to LIG_WRPW_1).
CG7047	FBgn0035103	Vdup1	MOD_Plk_4	Polo-like kinase phosphosites	Ser/Thr residue phosphorylated by Plk4
CG18748	FBgn0042105	CG18748	CLV_C14_Caspase3-7	Caspase cleavage motif	Caspase-3 and Caspase-7 cleavage site.
CG18748	FBgn0042105	CG18748	DEG_SCF_FBW7_1	SCF ubiquitin ligase binding Phosphodegrons	The TPxxS phospho-dependent degron binds the FBW7 F box proteins of the SCF (Skp1_Cullin-Fbox) complex.
CG18748	FBgn0042105	CG18748	DOC_CKS1_1	Cks1 ligand	Phospho-dependent motif that mediates docking of CDK substrates and regulators to cyclin-CDK-bound Cks1.
CG18748	FBgn0042105	CG18748	DOC_PP2B_LxvP_1	Calcineurin (PP2B)-docking motif LxvP	Docking motif in calcineurin substrates that binds at the interface of the catalytic CNA and regulatory CNB subunits.
CG18748	FBgn0042105	CG18748	DOC_USP7_UBL2_3	USP7 binding motif	The USP7 CTD domain binding motif variant based on the ICP0 and DNMT1 interactions
CG18748	FBgn0042105	CG18748	LIG_14-3-3_CanoR_1	14-3-3 binding phosphopeptide motif	Canonical Arg-containing phospho-motif mediating a strong interaction with 14-3-3 proteins.
CG18748	FBgn0042105	CG18748	LIG_FHA_1	FHA phosphopeptide ligands	Phosphothreonine motif binding a subset of FHA domains that show a preference for a large aliphatic amino acid at the pT+3 position.
CG18748	FBgn0042105	CG18748	LIG_FHA_2	FHA phosphopeptide ligands	Phosphothreonine motif binding a subset of FHA domains that have a preference for an acidic amino acid at the pT+3 position.
CG18748	FBgn0042105	CG18748	LIG_LIR_Gen_1	Atg8 protein family ligands	Canonical LIR motif that binds to Atg8 protein family members to mediate processes involved in autophagy.
CG18748	FBgn0042105	CG18748	LIG_SH2_SRC	SH2 ligand	Src-family Src Homology 2 (SH2) domains binding motif.
CG18748	FBgn0042105	CG18748	LIG_SH2_STAT3	SH2 ligand	YXXQ motif found in the cytoplasmic region of cytokine receptors that bind STAT3 SH2 domain.
CG18748	FBgn0042105	CG18748	LIG_SH2_STAT5	SH2 ligand	STAT5 Src Homology 2 (SH2) domain binding motif.
CG18748	FBgn0042105	CG18748	LIG_WW_1	WW domain ligands	PPXY is the motif recognized by WW domains of Group I
CG18748	FBgn0042105	CG18748	MOD_N-GLC_1	N-glycosylation site	Generic motif for N-glycosylation. It was shown that Trp, Asp, and Glu are uncommon before the Ser/Thr position. Efficient glycosylation usually occurs when ~60 residues or more separate the glycosylation acceptor site from the C-terminus.
CG18748	FBgn0042105	CG18748	MOD_NEK2_1	NEK2 phosphorylation site	NEK2 phosphorylation motif with preferred Phe, Leu or Met in the -3 position to compensate for less favorable residues in the +1 and +2 position.
CG18748	FBgn0042105	CG18748	MOD_PIKK_1	PIKK phosphorylation site	(ST)Q motif which is phosphorylated by PIKK family members.
CG18748	FBgn0042105	CG18748	MOD_Plk_1	Polo-like kinase phosphosites	Ser/Thr residue phosphorylated by the Plk1 kinase
CG18748	FBgn0042105	CG18748	MOD_Plk_4	Polo-like kinase phosphosites	Ser/Thr residue phosphorylated by Plk4
CG18748	FBgn0042105	CG18748	MOD_SUMO_for_1	Sumoylation site	Motif recognised for modification by SUMO-1
CG18748	FBgn0042105	CG18748	TRG_ENDOCYTIC_2	Y-based sorting signal	Tyrosine-based sorting signal responsible for the interaction with mu subunit of AP (Adaptor Protein) complex
CG10086	FBgn0037517	CG10086	CLV_NRD_NRD_1	NRD cleavage site	N-Arg dibasic convertase (NRD/Nardilysin) cleavage site (X-|-R-K or R-|-R-X).
CG10086	FBgn0037517	CG10086	DEG_COP1_1	COP1 E3 ligase binding degron motif	A destruction motif interacts with the COP1 WD 40 domain for target ubiquitination and degradation.
CG10086	FBgn0037517	CG10086	DEG_SPOP_SBC_1	SPOP SBC docking motif	The S/T rich motif known as the SPOP-binding consensus (SBC) of the MATH-BTB protein, SPOP, is present in substrates that undergo SPOP/Cul3-dependant ubiquitination.
CG10086	FBgn0037517	CG10086	DOC_PP2B_LxvP_1	Calcineurin (PP2B)-docking motif LxvP	Docking motif in calcineurin substrates that binds at the interface of the catalytic CNA and regulatory CNB subunits.
CG10086	FBgn0037517	CG10086	LIG_FHA_1	FHA phosphopeptide ligands	Phosphothreonine motif binding a subset of FHA domains that show a preference for a large aliphatic amino acid at the pT+3 position.
CG10086	FBgn0037517	CG10086	LIG_FHA_2	FHA phosphopeptide ligands	Phosphothreonine motif binding a subset of FHA domains that have a preference for an acidic amino acid at the pT+3 position.
CG10086	FBgn0037517	CG10086	LIG_MYND_1	MYND domain binding motif.	PxLxP motif is recognized by a subset of MYND domain containing proteins.
CG10086	FBgn0037517	CG10086	LIG_PDZ_Class_2	PDZ ligands	The C-terminal class 2 PDZ-binding motif is classically represented by a pattern such as (VYF)X(VIL)*
CG10086	FBgn0037517	CG10086	LIG_PTB_Apo_2	PTB ligand	These phosphorylation-independent motifs bind to Dab-like PTB domains. Binding is not driven by contacts at the 0 or FY position, but instead is dependent upon the large number of hydrophobic and hydrogen bond contacts between motif and domain.
CG10086	FBgn0037517	CG10086	LIG_PTB_Phospho_1	PTB ligand	This phosphorylation-dependent motif binds to Shc-like and IRS-like PTB domains. The pTyr is positioned within a highly basic-charged anchoring pocket. A hydrophobic residue -5 (compared to pY) increases the affinity of the interaction.
CG10086	FBgn0037517	CG10086	LIG_SH3_1	SH3 ligand	This is the motif recognized by class I SH3 domains
CG10086	FBgn0037517	CG10086	LIG_SH3_2	SH3 ligand	This is the motif recognized by class II SH3 domains
CG10086	FBgn0037517	CG10086	LIG_WW_1	WW domain ligands	PPXY is the motif recognized by WW domains of Group I
CG10086	FBgn0037517	CG10086	MOD_CDK_SPK_2	CDK Phosphorylation Site	Short version of the CDK phosphorylation site which shows specificity towards a lysine/arginine residue at the [ST] +2 position.
CG10086	FBgn0037517	CG10086	MOD_NEK2_1	NEK2 phosphorylation site	NEK2 phosphorylation motif with preferred Phe, Leu or Met in the -3 position to compensate for less favorable residues in the +1 and +2 position.
CG10086	FBgn0037517	CG10086	MOD_Plk_1	Polo-like kinase phosphosites	Ser/Thr residue phosphorylated by the Plk1 kinase
CG10086	FBgn0037517	CG10086	TRG_ENDOCYTIC_2	Y-based sorting signal	Tyrosine-based sorting signal responsible for the interaction with mu subunit of AP (Adaptor Protein) complex
CG10086	FBgn0037517	CG10086	TRG_ER_diArg_1	di Arginine retention/retrieving signal	The di-Arg ER retention motif is defined by two consecutive arginine residues (RR) or with a single residue insertion (RXR). The motif is completed by an adjacent hydrophobic/arginine residue which may be on either side of the Arg pair.
CG10086	FBgn0037517	CG10086	TRG_NES_CRM1_1	NES Nuclear Export Signal	Some proteins re-exported from the nucleus contain a Leucine-rich nuclear export signal (NES) binding to the CRM1 exportin protein.
CG10086	FBgn0037517	CG10086	TRG_NLS_MonoCore_2	NLS classical Nuclear Localization Signals	Monopartite variant of the classical basically charged NLS. Strong core version.
CG10086	FBgn0037517	CG10086	TRG_NLS_MonoExtC_3	NLS classical Nuclear Localization Signals	Monopartite variant of the classical basically charged NLS. C-extended version.
CG10086	FBgn0037517	CG10086	TRG_NLS_MonoExtN_4	NLS classical Nuclear Localization Signals	Monopartite variant of the classical basically charged NLS. N-extended version.
CG18744	FBgn0042101	CG18744	DEG_SCF_FBW7_2	SCF ubiquitin ligase binding Phosphodegrons	The TPxxE phospho-dependent degron binds the FBW7 F box proteins of the SCF (Skp1_Cullin-Fbox) complex.
CG18744	FBgn0042101	CG18744	DOC_CYCLIN_RxL_1	Cyclin docking motif	This motif is mainly based on cyclin A binding peptides and may not apply to all cyclins.
CG18744	FBgn0042101	CG18744	DOC_USP7_MATH_2	USP7 binding motif	The USP7 MATH domain binding motif variant based on the EBV EBNA1 interaction.
CG18744	FBgn0042101	CG18744	LIG_FHA_1	FHA phosphopeptide ligands	Phosphothreonine motif binding a subset of FHA domains that show a preference for a large aliphatic amino acid at the pT+3 position.
CG18744	FBgn0042101	CG18744	LIG_FHA_2	FHA phosphopeptide ligands	Phosphothreonine motif binding a subset of FHA domains that have a preference for an acidic amino acid at the pT+3 position.
CG18744	FBgn0042101	CG18744	LIG_SH2_STAT5	SH2 ligand	STAT5 Src Homology 2 (SH2) domain binding motif.
CG18744	FBgn0042101	CG18744	MOD_CDK_SPK_2	CDK Phosphorylation Site	Short version of the CDK phosphorylation site which shows specificity towards a lysine/arginine residue at the [ST] +2 position.
CG18744	FBgn0042101	CG18744	MOD_CDK_SPxxK_3	CDK Phosphorylation Site	Longer version of the CDK phosphorylation site which shows specificity towards a lysine/arginine residue at position +4 after the phospho-Ser/Thr
CG18744	FBgn0042101	CG18744	MOD_N-GLC_1	N-glycosylation site	Generic motif for N-glycosylation. It was shown that Trp, Asp, and Glu are uncommon before the Ser/Thr position. Efficient glycosylation usually occurs when ~60 residues or more separate the glycosylation acceptor site from the C-terminus.
CG18744	FBgn0042101	CG18744	MOD_NEK2_1	NEK2 phosphorylation site	NEK2 phosphorylation motif with preferred Phe, Leu or Met in the -3 position to compensate for less favorable residues in the +1 and +2 position.
CG18744	FBgn0042101	CG18744	MOD_PIKK_1	PIKK phosphorylation site	(ST)Q motif which is phosphorylated by PIKK family members.
CG18744	FBgn0042101	CG18744	MOD_Plk_1	Polo-like kinase phosphosites	Ser/Thr residue phosphorylated by the Plk1 kinase
CG18744	FBgn0042101	CG18744	MOD_Plk_4	Polo-like kinase phosphosites	Ser/Thr residue phosphorylated by Plk4
CG18744	FBgn0042101	CG18744	TRG_ENDOCYTIC_2	Y-based sorting signal	Tyrosine-based sorting signal responsible for the interaction with mu subunit of AP (Adaptor Protein) complex
CG18744	FBgn0042101	CG18744	TRG_ER_diArg_1	di Arginine retention/retrieving signal	The di-Arg ER retention motif is defined by two consecutive arginine residues (RR) or with a single residue insertion (RXR). The motif is completed by an adjacent hydrophobic/arginine residue which may be on either side of the Arg pair.
CG2641	FBgn0037518	CG2641	DOC_CKS1_1	Cks1 ligand	Phospho-dependent motif that mediates docking of CDK substrates and regulators to cyclin-CDK-bound Cks1.
CG2641	FBgn0037518	CG2641	DOC_PP2B_LxvP_1	Calcineurin (PP2B)-docking motif LxvP	Docking motif in calcineurin substrates that binds at the interface of the catalytic CNA and regulatory CNB subunits.
CG2641	FBgn0037518	CG2641	LIG_14-3-3_CanoR_1	14-3-3 binding phosphopeptide motif	Canonical Arg-containing phospho-motif mediating a strong interaction with 14-3-3 proteins.
CG2641	FBgn0037518	CG2641	LIG_EVH1_2	EVH1 ligands	Proline-rich motif binding to signal transduction class II EVH1 domains.
CG2641	FBgn0037518	CG2641	LIG_FHA_1	FHA phosphopeptide ligands	Phosphothreonine motif binding a subset of FHA domains that show a preference for a large aliphatic amino acid at the pT+3 position.
CG2641	FBgn0037518	CG2641	LIG_FHA_2	FHA phosphopeptide ligands	Phosphothreonine motif binding a subset of FHA domains that have a preference for an acidic amino acid at the pT+3 position.
CG2641	FBgn0037518	CG2641	LIG_LIR_Gen_1	Atg8 protein family ligands	Canonical LIR motif that binds to Atg8 protein family members to mediate processes involved in autophagy.
CG2641	FBgn0037518	CG2641	LIG_PTAP_UEV_1	UEV Domain binding PTAP motif	PTAP motif binds the N-terminal UEV domain of Tsg101.
CG2641	FBgn0037518	CG2641	LIG_SH2_GRB2	SH2 ligand	GRB2-like Src Homology 2 (SH2) domains binding motif.
CG2641	FBgn0037518	CG2641	LIG_SH2_STAT5	SH2 ligand	STAT5 Src Homology 2 (SH2) domain binding motif.
CG2641	FBgn0037518	CG2641	LIG_TRAF2_1	TRAF2 binding site	Major TRAF2-binding consensus motif. Members of the tumor necrosis factor receptor (TNFR) superfamily initiate intracellular signaling by recruiting the C-domain of the TNFR-associated factors (TRAFs) through their cytoplasmic tails.
CG2641	FBgn0037518	CG2641	LIG_WD40_WDR5_VDV_1	WDR5 WD40 repeat (blade 5,6)-binding ligand	This WDR5-binding motif binds to a cleft between blades 5 and 6 of the WD40 repeat domain of WDR5, opposite of the Win motif-binding site, to mediate assembly of histone modification complexes.
CG2641	FBgn0037518	CG2641	LIG_WW_1	WW domain ligands	PPXY is the motif recognized by WW domains of Group I
CG2641	FBgn0037518	CG2641	MOD_N-GLC_1	N-glycosylation site	Generic motif for N-glycosylation. It was shown that Trp, Asp, and Glu are uncommon before the Ser/Thr position. Efficient glycosylation usually occurs when ~60 residues or more separate the glycosylation acceptor site from the C-terminus.
CG2641	FBgn0037518	CG2641	MOD_PIKK_1	PIKK phosphorylation site	(ST)Q motif which is phosphorylated by PIKK family members.
CG2641	FBgn0037518	CG2641	MOD_PKA_2	PKA Phosphorylation site	Secondary preference for PKA-type AGC kinase phosphorylation.
CG2641	FBgn0037518	CG2641	TRG_ENDOCYTIC_2	Y-based sorting signal	Tyrosine-based sorting signal responsible for the interaction with mu subunit of AP (Adaptor Protein) complex

## Sheet: E. Fly prey Pfam
Prey(Annotation Id)	Prey(Flybase Id)	Prey(Symbol)	Pfam domain(s)	Pfam domain name(s)
CG9393	FBgn0037710	FBgn0037710	PF17171,PF10568	GST_C_6,Tom37
CG7668	FBgn0036929	FBgn0036929	PF00147	Fibrinogen_C
CG7546	FBgn0035793	FBgn0035793	PF12057,PF00240	DUF3538,ubiquitin
CG5215	FBgn0263603	FBgn0263603	PF07528	DZF
CG6095	FBgn0266668	FBgn0266668	PF16528	Exo84_C
CG10540	FBgn0034577	FBgn0034577	PF01267	F-actin_cap_A
CG1845	FBgn0033155	FBgn0033155	PF00439,PF10513,PF00855	Bromodomain,EPL1,PWWP
CG8710	FBgn0033265	FBgn0033265	PF15862	Coilin_N
CG9712	FBgn0036666	FBgn0036666	PF05743,PF09454	UEV,Vps23_core
CG10465	FBgn0033017	FBgn0033017	PF02214	BTB_2
CG9491	FBgn0265778	FBgn0265778	PF00595,PF00788,PF00617,PF00618	PDZ,RA,RasGEF,RasGEF_N
CG10354	FBgn0031868	FBgn0031868	PF03159	XRN_N
CG12261	FBgn0039555	FBgn0039555	PF10245	MRP-S22
CG9577	FBgn0031092	FBgn0031092	PF00378	ECH_1
CG3400	FBgn0027621	FBgn0027621	PF01591,PF00300	6PF2K,His_Phos_1
CG8939	FBgn0030720	FBgn0030720	PF11861,PF01728,PF07780	DUF3381,FtsJ,Spb1_C
CG5289	FBgn0015282	FBgn0015282	PF00004	AAA
CG8877	FBgn0033688	FBgn0033688	PF01398,PF08082,PF08083,PF08084,PF12134,PF10598,PF10597,PF10596	JAB,PRO8NT,PROCN,PROCT,PRP8_domainIV,RRM_4,U5_2-snRNA_bdg,U6-snRNA_bdg
CG1523	FBgn0039601	FBgn0039601	PF00400	WD40
CG11274	FBgn0036340	FBgn0036340	PF01480	PWI
CG5436	FBgn0001230	FBgn0001230	PF00012	HSP70
CG9401	FBgn0002736	FBgn0002736	PF02792	Mago_nashi
CG13849	FBgn0038964	FBgn0038964	PF01798,PF08156	Nop,NOP5NT
CG13848	FBgn0038966	FBgn0038966	PF00650	CRAL_TRIO
CG6718	FBgn0036053	FBgn0036053	PF12796,PF01734	Ank_2,Patatin
CG6303	FBgn0266717	FBgn0266717	PF00653,PF12356,PF00179	BIR,BIRC6,UQ_con
CG5965	FBgn0010328	FBgn0010328	PF12012,PF06467	DUF3504,zf-FCS
CG8276	FBgn0263144	FBgn0263144	PF06859,PF13847	Bin3,Methyltransf_31
CG8578	FBgn0030699	FBgn0030699	PF09738	LRRFIP
CG9881	FBgn0031437	FBgn0031437	PF04699	P16-Arc
CG1622	FBgn0030468	FBgn0030468	PF03371	PRP38
CG3249	FBgn0263987	FBgn0263987	PF00013,PF00567	KH_1,TUDOR
CG32575	FBgn0026575	FBgn0026575	PF07776	zf-AD
CG4980	FBgn0039558	FBgn0039558	PF05700	BCAS2
CG7843	FBgn0033062	FBgn0033062	PF04959,PF12066	ARS2,DUF3546
CG13400	FBgn0027490	FBgn0027490	PF03366	YEATS
CG7246	FBgn0030081	FBgn0030081	PF08640	U3_assoc_6
CG13472	FBgn0036450	FBgn0036450	PF08585,PF06003,PF00627	RMI1_N,SMN,UBA
CG1715	FBgn0010808	FBgn0010808	PF07956	DUF1690
CG18361	FBgn0000499	FBgn0000499	PF00610,PF02377,PF00778,PF00595	DEP,Dishevelled,DIX,PDZ
CG3231	FBgn0086129	FBgn0086129	PF08783,PF13696	DWNN,zf-CCHC_2
CG12323	FBgn0029134	FBgn0029134	PF00227	Proteasome
CG40351	FBgn0040022	FBgn0040022	PF11764,PF00076,PF00856	N-SET,RRM_1,SET
CG9680	FBgn0004556	FBgn0004556	PF00270,PF00271	DEAD,Helicase_C
CG5728	FBgn0039182	FBgn0039182	PF00575,PF05843	S1,Suf
CG17753	FBgn0010531	FBgn0010531	PF00080	Sod_Cu
CG9900	FBgn0004643	FBgn0004643	PF06248	Zw10
CG9901	FBgn0011742	FBgn0011742	PF00022	Actin
CG7028	FBgn0027587	FBgn0027587	PF00069	Pkinase
CG4145	FBgn0000299	FBgn0000299	PF01413,PF01391	C4,Collagen
CG8683	FBgn0031985	FBgn0031985	PF16213,PF09324,PF16206,PF12783	DCB,DUF1981,Mon2_C,Sec7_N
CG7438	FBgn0086347	FBgn0086347	PF00612,PF00063,PF06017	IQ,Myosin_head,Myosin_TH1
CG15099	FBgn0034400	FBgn0034400	PF04118	Dopey_N
CG7611	FBgn0037094	FBgn0037094	PF00400	WD40
CG12135	FBgn0040235	FBgn0040235	PF04889	Cwf_Cwc_15
CG5366	FBgn0027568	FBgn0027568	PF08623	TIP120
CG13957	FBgn0030739	FBgn0030739	PF14746,PF14744,PF14745	WASH-7_C,WASH-7_mid,WASH-7_N
CG7619	FBgn0015283	FBgn0015283	PF02809,PF13519	UIM,VWA_2
CG31022	FBgn0039776	FBgn0039776	PF13640,PF08336	2OG-FeII_Oxy_3,P4Ha_N
CG12785	FBgn0261286	FBgn0261286	PF03813,PF17403,PF17404,PF17405,PF17406,PF17407	Nrap,Nrap_D2,Nrap_D3,Nrap_D4,Nrap_D5,Nrap_D6
CG4004	FBgn0030418	FBgn0030418	PF10545	MADF_DNA_bdg
CG4005	FBgn0034970	FBgn0034970	PF00397	WW
CG1970	FBgn0039909	FBgn0039909	PF00346	Complex1_49kDa
CG6757	FBgn0040475	FBgn0040475	PF10456,PF00787,PF00018	BAR_3_WASP_bdg,PX,SH3_1
CG17331	FBgn0032596	FBgn0032596	PF00227	Proteasome
CG6693	FBgn0037878	FBgn0037878	PF00226	DnaJ
CG9300	FBgn0036886	FBgn0036886	PF08168	NUC205
CG11981	FBgn0026380	FBgn0026380	PF00227	Proteasome
CG7057	FBgn0263351	FBgn0263351	PF00928,PF01217	Adap_comp_sub,Clat_adaptor_s
CG44159	FBgn0265042	FBgn0265042	PF01007	IRK
CG33967	FBgn0262127	FBgn0262127	PF00168,PF00397	C2,WW
CG17723	FBgn0035432	FBgn0035432	PF01545	Cation_efflux
CG2875	FBgn0029672	FBgn0029672	PF03914	CBF
CG4560	FBgn0038369	FBgn0038369	PF04062	P21-Arc
CG8233	FBgn0033897	FBgn0033897	PF01738	DLH
CG14641	FBgn0037220	FBgn0037220	PF00076	RRM_1
CG4257	FBgn0016917	FBgn0016917	PF00017,PF01017,PF02864,PF02865	SH2,STAT_alpha,STAT_bind,STAT_int
CG2970	FBgn0034936	FBgn0034936	PF01145,PF16200	Band_7,Band_7_C
CG1575	FBgn0029999	FBgn0029999	PF12333	Ipi1_N
CG4097	FBgn0002284	FBgn0002284	PF00227	Proteasome
CG43119	FBgn0262579	FBgn0262579	PF07647,PF13676	SAM_2,TIR_2
CG6375	FBgn0266581	FBgn0266581	PF00270,PF13959,PF00271	DEAD,DUF4217,Helicase_C
CG4849	FBgn0039566	FBgn0039566	PF00679,PF03764,PF16004,PF00009,PF03144	EFG_C,EFG_IV,EFTUD2,GTP_EFTU,GTP_EFTU_D2
CG32435	FBgn0021760	FBgn0021760	PF12348	CLASP_N
CG1474	FBgn0023506	FBgn0023506	PF09751	Es2
CG7392	FBgn0044323	FBgn0044323	PF08232,PF00400	Striatin,WD40
CG42328	FBgn0259228	FBgn0259228	PF00617,PF00618	RasGEF,RasGEF_N
CG4699	FBgn0262527	FBgn0262527	PF15275	PEHE
CG8487	FBgn0264560	FBgn0264560	PF01369,PF12783	Sec7,Sec7_N
CG42320	FBgn0265998	FBgn0265998	PF00069	Pkinase
CG14228	FBgn0086384	FBgn0086384	PF00769,PF09380,PF00373,PF09379	ERM,FERM_C,FERM_M,FERM_N
CG2713	FBgn0250874	FBgn0250874	PF03031	NIF
CG2658	FBgn0024992	FBgn0024992	PF00004,PF06480,PF01434	AAA,FtsH_ext,Peptidase_M41
CG14637	FBgn0015331	FBgn0015331	PF00270,PF00271	DEAD,Helicase_C
CG2718	FBgn0001142	FBgn0001142	PF00120,PF03951	Gln-synt_C,Gln-synt_N
CG14224	FBgn0031057	FBgn0031057	PF00627,PF00240	UBA,ubiquitin
CG3025	FBgn0014340	FBgn0014340	PF01853,PF11717	MOZ_SAS,Tudor-knot
CG8241	FBgn0086895	FBgn0086895	PF04408,PF00271,PF07717,PF00575	HA2,Helicase_C,OB_NTP_bind,S1
CG1994	FBgn0027330	FBgn0027330	PF08351,PF13718,PF05127,PF13725	DUF1726,GNAT_acetyltr_2,Helicase_RecD,tRNA_bind_2
CG18249	FBgn0037553	FBgn0037553	PF13855	LRR_8
CG4389	FBgn0028479	FBgn0028479	PF00725,PF02737,PF00378	3HCDH,3HCDH_N,ECH_1
CG6474	FBgn0000617	FBgn0000617	PF02291	TFIID-31kDa
CG3172	FBgn0038206	FBgn0038206	PF00241	Cofilin_ADF
CG15100	FBgn0034401	FBgn0034401	PF14497,PF09334,PF00458	GST_C_3,tRNA-synt_1g,WHEP-TRS
CG15104	FBgn0267351	FBgn0267351	PF00097	zf-C3HC4
CG4625	FBgn0040212	FBgn0040212	PF01553	Acyltransferase
CG8414	FBgn0034073	FBgn0034073	PF16575	CLP1_P
CG7935	FBgn0026252	FBgn0026252	PF08506,PF03810	Cse1,IBN_N
CG8793	FBgn0260655	FBgn0260655	PF12739,PF08626	TRAPPC-Trs85,TRAPPC9-Trs120
CG4183	FBgn0001225	FBgn0001225	PF00011	HSP20
CG11583	FBgn0035524	FBgn0035524	PF04427	Brix
CG7478	FBgn0000045	FBgn0000045	PF00022	Actin
CG2252	FBgn0004656	FBgn0004656	PF17035,PF17105,PF00439	BET,BRD4_CDT,Bromodomain
CG13176	FBgn0033692	FBgn0033692	PF11945	WASH_WAHD
CG1059	FBgn0087013	FBgn0087013	PF02985	HEAT
CG2982	FBgn0266570	FBgn0266570	PF08007	Cupin_4
CG42616	FBgn0261268	FBgn0261268	PF00888,PF10557	Cullin,Cullin_Nedd8
CG12070	FBgn0000416	FBgn0000416	PF02199,PF05184,PF03489	SapA,SapB_1,SapB_2
CG12076	FBgn0027616	FBgn0027616	PF04146	YTH
CG7490	FBgn0000100	FBgn0000100	PF00466	Ribosomal_L10
CG7558	FBgn0262716	FBgn0262716	PF00022	Actin
CG10805	FBgn0086451	FBgn0086451	PF08146,PF12397	BP28CT,U3snoRNP10
CG7744	FBgn0034447	FBgn0034447	PF09779	Ima1_N
CG13316	FBgn0023215	FBgn0023215	PF00010	HLH
CG5808	FBgn0027617	FBgn0027617	PF00160,PF00076	Pro_isomerase,RRM_1
CG6015	FBgn0038927	FBgn0038927	PF00400	WD40
CG10360	FBgn0003231	FBgn0003231	PF00564,PF16577,PF00569	PB1,UBA_5,ZZ
CG10363	FBgn0041180	FBgn0041180	PF00207,PF07678,PF01835,PF07703,PF07677,PF10569	A2M,A2M_comp,A2M_N,A2M_N_2,A2M_recep,Thiol-ester_cl
CG5800	FBgn0030855	FBgn0030855	PF00270,PF13959,PF00271	DEAD,DUF4217,Helicase_C
CG2028	FBgn0015024	FBgn0015024	PF00069	Pkinase
CG10206	FBgn0026196	FBgn0026196	PF01798,PF08156	Nop,NOP5NT
CG2025	FBgn0030344	FBgn0030344	PF00675,PF05193,PF16187	Peptidase_M16,Peptidase_M16_C,Peptidase_M16_M
CG16858	FBgn0016075	FBgn0016075	PF01413,PF01391	C4,Collagen
CG16916	FBgn0028686	FBgn0028686	PF00004	AAA
CG11734	FBgn0031107	FBgn0031107	PF11515,PF00173,PF00632,PF06701,PF00415	Cul7,Cyt-b5,HECT,MIB_HERC2,RCC1
CG6905	FBgn0265574	FBgn0265574	PF11831	Myb_Cef
CG1945	FBgn0005632	FBgn0005632	PF00443	UCH
CG3436	FBgn0031229	FBgn0031229	PF00400	WD40
CG5336	FBgn0032409	FBgn0032409	PF11841,PF04727,PF16457	DUF3361,ELMO_CED12,PH_12
CG3431	FBgn0011327	FBgn0011327	PF01088	Peptidase_C12
CG8978	FBgn0001961	FBgn0001961	PF00400	WD40
CG1539	FBgn0082582	FBgn0082582	PF03250	Tropomodulin
CG6668	FBgn0039213	FBgn0039213	PF02263	GBP
CG13387	FBgn0020497	FBgn0020497	PF08767,PF03810,PF08389	CRM1_C,IBN_N,Xpo1
CG8843	FBgn0266670	FBgn0266670	PF01833	TIG
CG9006	FBgn0086712	FBgn0086712	PF00441,PF02771	Acyl-CoA_dh_1,Acyl-CoA_dh_N
CG9004	FBgn0035336	FBgn0035336	PF02847,PF02854	MA3,MIF4G
CG9155	FBgn0010246	FBgn0010246	PF00063,PF06017	Myosin_head,Myosin_TH1
CG11166	FBgn0033166	FBgn0033166	PF09816	EAF
CG17158	FBgn0011570	FBgn0011570	PF01115	F_actin_cap_B
CG6522	FBgn0034223	FBgn0034223	PF00412,PF06297	LIM,PET
CG42569	FBgn0260771	FBgn0260771	PF05383,PF00076,PF08777	La,RRM_1,RRM_3
CG2925	FBgn0014366	FBgn0014366	PF11931,PF16837,PF12108	DUF3449,SF3A3,SF3a60_bindingd
CG1796	FBgn0030365	FBgn0030365	PF00400	WD40
CG32498	FBgn0000479	FBgn0000479	PF00233	PDEase_I
CG8368	FBgn0035707	FBgn0035707	PF00929	RNase_T
CG2843	FBgn0031452	FBgn0031452	PF10197,PF12542	Cir_N,CWC25
CG4554	FBgn0034734	FBgn0034734	PF07539	DRIM
CG10061	FBgn0011020	FBgn0011020	PF07202	Tcp10_C
CG31368	FBgn0051368	FBgn0051368	PF16399	Aquarius_N
CG10067	FBgn0000044	FBgn0000044	PF00022	Actin
CG1799	FBgn0003204	FBgn0003204	PF00571,PF00478	CBS,IMPDH
CG3508	FBgn0038251	FBgn0038251	PF15313	HEXIM
CG2807	FBgn0031266	FBgn0031266	PF08920	SF3b1
CG5020	FBgn0020503	FBgn0020503	PF01302,PF16641	CAP_GLY,CLIP1_ZNF
CG6875	FBgn0000140	FBgn0000140	PF15780,PF00307,PF00612	ASH,CH,IQ
CG1891	FBgn0003317	FBgn0003317	PF01064,PF07714,PF08515	Activin_recp,Pkinase_Tyr,TGF_beta_GS
CG3312	FBgn0014024	FBgn0014024	PF05391,PF00076	Lsm_interact,RRM_1
CG32082	FBgn0052082	FBgn0052082	PF08397,PF00018	IMD,SH3_1
CG9985	FBgn0016984	FBgn0016984	PF01504	PIP5K
CG3613	FBgn0022986	FBgn0022986	PF00013	KH_1
CG2212	FBgn0003656	FBgn0003656	PF00027,PF01734	cNMP_binding,Patatin
CG5650	FBgn0004103	FBgn0004103	PF00149,PF16891	Metallophos,STPPase_N
CG5651	FBgn0086706	FBgn0086706	PF00005,PF00037,PF04068	ABC_tran,Fer4,RLI
CG18273	FBgn0029525	FBgn0029525	PF10441	Urb2
CG1099	FBgn0023388	FBgn0023388	PF12763,PF14604	EF-hand_4,SH3_9
CG3225	FBgn0031631	FBgn0031631	PF04408,PF00271,PF07717	HA2,Helicase_C,OB_NTP_bind
CG1091	FBgn0037470	FBgn0037470	PF03828	PAP_assoc
CG3595	FBgn0003514	FBgn0003514	PF13405	EF-hand_6
CG18005	FBgn0037660	FBgn0037660	PF07807,PF07808	RED_C,RED_N
CG5792	FBgn0032455	FBgn0032455	PF08190	PIH1
CG12703	FBgn0031069	FBgn0031069	PF06472,PF00005	ABC_membrane_2,ABC_tran
CG10473	FBgn0263198	FBgn0263198	PF16294	RSB_motif
CG7194	FBgn0035868	FBgn0035868	PF03281	Mab-21
CG4170	FBgn0024183	FBgn0024183	PF04774	HABP4_PAI-RBP1
CG7192	FBgn0030894	FBgn0030894	PF10240	DUF2464
CG34349	FBgn0266719	FBgn0266719	PF00168	C2
CG8583	FBgn0035771	FBgn0035771	PF00226,PF02889	DnaJ,Sec63
CG14816	FBgn0023517	FBgn0023517	PF00300	His_Phos_1
CG7429	FBgn0031979	FBgn0031979	PF10152	CCDC53
CG10083	FBgn0036372	FBgn0036372	PF00241,PF14604	Cofilin_ADF,SH3_9
CG3983	FBgn0038473	FBgn0038473	PF08701,PF01926	GN3L_Grn1,MMR_HSR1
CG13345	FBgn0086356	FBgn0086356	PF00130,PF00620	C1_1,RhoGAP
CG1866	FBgn0039581	FBgn0039581	PF00160	Pro_isomerase
CG16941	FBgn0266917	FBgn0266917	PF12230,PF01805,PF00240	PRP21_like_P,Surp,ubiquitin
CG8730	FBgn0026722	FBgn0026722	PF00035,PF14622,PF00636	dsrm,Ribonucleas_3_3,Ribonuclease_3
CG5931	FBgn0263599	FBgn0263599	PF00270,PF00271,PF02889	DEAD,Helicase_C,Sec63
CG8632	FBgn0033762	FBgn0033762	PF01545	Cation_efflux
CG10236	FBgn0002526	FBgn0002526	PF00052,PF00053,PF00054,PF02210,PF06008,PF06009,PF00055	Laminin_B,Laminin_EGF,Laminin_G_1,Laminin_G_2,Laminin_I,Laminin_II,Laminin_N
CG6189	FBgn0001341	FBgn0001341	PF04931	DNA_pol_phi
CG6066	FBgn0039488	FBgn0039488	PF06047	SynMuv_product
CG16788	FBgn0037707	FBgn0037707	PF00076	RRM_1
CG4268	FBgn0016696	FBgn0016696	PF00069	Pkinase
CG6501	FBgn0034243	FBgn0034243	PF01926,PF08153	MMR_HSR1,NGP1NT
CG3460	FBgn0023542	FBgn0023542	PF04981	NMD3
CG4260	FBgn0264855	FBgn0264855	PF01602,PF02296,PF02883	Adaptin_N,Alpha_adaptin_C,Alpha_adaptinC2
CG8817	FBgn0041111	FBgn0041111	PF05110	AF-4
CG8814	FBgn0031478	FBgn0031478	PF00887	ACBP
CG4069	FBgn0036301	FBgn0036301	PF07646	Kelch_2
CG1915	FBgn0086906	FBgn0086906	PF06582,PF00041,PF07679,PF00018	DUF1136,fn3,I-set,SH3_1
CG11888	FBgn0028692	FBgn0028692	PF01851	PC_rep
CG7764	FBgn0261109	FBgn0261109	PF03849	Tfb2
CG6410	FBgn0034265	FBgn0034265	PF00787	PX
CG7831	FBgn0002924	FBgn0002924	PF00225,PF16796	Kinesin,Microtub_bd
CG8494	FBgn0033916	FBgn0033916	PF06337,PF00443	DUSP,UCH
CG8392	FBgn0010590	FBgn0010590	PF00227	Proteasome
CG17785	FBgn0039188	FBgn0039188	PF09787	Golgin_A5
CG10192	FBgn0260634	FBgn0260634	PF02847,PF02854	MA3,MIF4G
CG5695	FBgn0011225	FBgn0011225	PF16521,PF00063,PF02736	Myosin-VI_CBD,Myosin_head,Myosin_N
CG32217	FBgn0014037	FBgn0014037	PF10390,PF07303	ELL,Occludin_ELL
CG31012	FBgn0027598	FBgn0027598	PF14604,PF00018	SH3_9,SH3_1
CG4943	FBgn0029006	FBgn0029006	PF00168,PF00632,PF00397	C2,HECT,WW
CG6842	FBgn0283469	FBgn0283469	PF00004,PF04212,PF09336	AAA,MIT,Vps4_C
CG6843	FBgn0036827	FBgn0036827	PF10197	Cir_N
CG6841	FBgn0036828	FBgn0036828	PF06424	PRP1_N
CG13892	FBgn0035141	FBgn0035141	PF00160	Pro_isomerase
CG3499	FBgn0034792	FBgn0034792	PF00004,PF01434	AAA,Peptidase_M41
CG11943	FBgn0031078	FBgn0031078	PF11894	Nup192
CG1603	FBgn0033185	FBgn0033185	PF10545	MADF_DNA_bdg
CG3496	FBgn0003977	FBgn0003977	PF15912	VIR_N
CG32075	FBgn0052075	FBgn0052075	PF04031	Las1
CG7398	FBgn0024921	FBgn0024921	PF03810	IBN_N
CG18769	FBgn0042185	FBgn0042185	PF04678	MCU
CG18041	FBgn0039710	FBgn0039710	PF13891	zf-C3Hc3H
CG1135	FBgn0263832	FBgn0263832	PF00498,PF13325	FHA,MCRS_N
CG1134	FBgn0035483	FBgn0035483	PF12483	GIDE
CG8070	FBgn0033379	FBgn0033379	PF08158,PF05285	NUC130_3NT,SDA1
CG10289	FBgn0035688	FBgn0035688	PF04499	SAPS
CG5604	FBgn0032208	FBgn0032208	PF12796,PF00632,PF06701,PF07738	Ank_2,HECT,MIB_HERC2,Sad1_UNC
CG3722	FBgn0003391	FBgn0003391	PF00028,PF01049,PF02210	Cadherin,Cadherin_C,Laminin_G_2
CG2146	FBgn0261397	FBgn0261397	PF00612,PF00063,PF01843	IQ,Myosin_head,DIL
CG1484	FBgn0000709	FBgn0000709	PF00626,PF00560,PF13855	Gelsolin,LRR_1,LRR_8
CG3416	FBgn0002787	FBgn0002787	PF01398,PF13012	JAB,MitMem_reg
CG7261	FBgn0027509	FBgn0027509	PF12612	TFCD_C
CG4289	FBgn0037020	FBgn0037020	PF04695	Pex14_N
CG7483	FBgn0037573	FBgn0037573	PF00270,PF00271	DEAD,Helicase_C
CG34417	FBgn0085446	FBgn0085446	PF12510,PF00307	Smoothelin,CH
CG3885	FBgn0266669	FBgn0266669	PF15277,PF09763	Sec3-PIP2_bind,Sec3_C
CG33554	FBgn0053554	FBgn0053554	PF02259,PF02260,PF00454	FAT,FATC,PI3_PI4_kinase
CG12343	FBgn0033556	FBgn0033556	PF08231	SYF2
CG8475	FBgn0031995	FBgn0031995	PF00723	Glyco_hydro_15
CG6146	FBgn0004924	FBgn0004924	PF14370,PF01028,PF02919	Topo_C_assoc,Topoisom_I,Topoisom_I_N
CG10370	FBgn0028684	FBgn0028684	PF00004	AAA
CG10376	FBgn0032702	FBgn0032702	PF00481	PP2C
CG2031	FBgn0037382	FBgn0037382	PF00531,PF11957	Death,efThoc1
CG8472	FBgn0000253	FBgn0000253	PF13499	EF-hand_7
CG7993	FBgn0038585	FBgn0038585	PF04427	Brix
CG12749	FBgn0004237	FBgn0004237	PF00076	RRM_1
CG9674	FBgn0036663	FBgn0036663	PF00310,PF04898,PF01645,PF14691,PF01493,PF07992	GATase_2,Glu_syn_central,Glu_synthase,Fer4_20,GXGXG,Pyr_redox_2
CG7635	FBgn0030993	FBgn0030993	PF01145	Band_7
CG42279	FBgn0259174	FBgn0259174	PF00168,PF00632,PF00397	C2,HECT,WW
CG31671	FBgn0031390	FBgn0031390	PF11262,PF11732,PF16134	Tho2,Thoc2,THOC2_N
CG7639	FBgn0033989	FBgn0033989	PF01103	Bac_surface_Ag
CG11680	FBgn0002774	FBgn0002774	PF00270,PF00035,PF04408,PF00271,PF07717	DEAD,dsrm,HA2,Helicase_C,OB_NTP_bind
CG8912	FBgn0014870	FBgn0014870	PF09005,PF00013	DUF1897,KH_1
CG5903	FBgn0038400	FBgn0038400	PF09769	ApoO
CG7139	FBgn0027532	FBgn0027532	PF08590,PF01713	DUF1771,Smr
CG42551	FBgn0261618	FBgn0261618	PF05383	La
CG6512	FBgn0036702	FBgn0036702	PF00004,PF06480,PF01434	AAA,FtsH_ext,Peptidase_M41
CG6455	FBgn0019960	FBgn0019960	PF09731	Mitofilin
CG10712	FBgn0044324	FBgn0044324	PF00385	Chromo
CG31357	FBgn0051357	FBgn0051357	PF10607	CTLH
CG10719	FBgn0010300	FBgn0010300	PF01436,PF00643	NHL,zf-B_box
CG3455	FBgn0028685	FBgn0028685	PF00004	AAA
CG17520	FBgn0264492	FBgn0264492	PF00069	Pkinase
CG6322	FBgn0036733	FBgn0036733	PF08799,PF00400	PRP4,WD40
CG7946	FBgn0039743	FBgn0039743	PF11467,PF00855	LEDGF,PWWP
CG2671	FBgn0002121	FBgn0002121	PF08596,PF08366	Lgl_C,LLGL
CG13124	FBgn0032156	FBgn0032156	PF02854	MIF4G
CG9853	FBgn0086605	FBgn0086605	PF04190	DUF410
CG3606	FBgn0285954	FBgn0285954	PF00076,PF00641	RRM_1,zf-RanBP
CG3605	FBgn0031493	FBgn0031493	PF04037,PF04046	DUF382,PSP
CG3193	FBgn0000377	FBgn0000377	PF02184	HAT
CG10522	FBgn0002466	FBgn0002466	PF00780,PF00069,PF00433	CNH,Pkinase,Pkinase_C
CG8184	FBgn0030674	FBgn0030674	PF00632,PF14377,PF06012,PF06025,PF00627,PF02825	HECT,DUF4414,DUF908,DUF913,UBA,WWE
CG4931	FBgn0038320	FBgn0038320	PF07159,PF05994	DUF1394,FragX_IP
CG1106	FBgn0010225	FBgn0010225	PF00626	Gelsolin
CG15437	FBgn0027609	FBgn0027609	PF12937,PF00179	F-box-like,UQ_con
CG1100	FBgn0028690	FBgn0028690	PF01399	PCI
CG12306	FBgn0003124	FBgn0003124	PF00069,PF00659	Pkinase,POLO_box
CG10954	FBgn0032859	FBgn0032859	PF04045	P34-Arc
CG2253	FBgn0029992	FBgn0029992	PF02854,PF04050	MIF4G,Upf2
CG8001	FBgn0035268	FBgn0035268	PF00400	WD40
CG5704	FBgn0026570	FBgn0026570	PF00561	Abhydrolase_1
CG2173	FBgn0021995	FBgn0021995	PF00270,PF00271	DEAD,Helicase_C
CG7456	FBgn0032258	FBgn0032258	PF08318	COG4
CG7893	FBgn0040068	FBgn0040068	PF00130,PF00307,PF00621,PF00017,PF14604	C1_1,CH,RhoGEF,SH2,SH3_9
CG5206	FBgn0023097	FBgn0023097	PF00439,PF00628,PF00643	Bromodomain,PHD,zf-B_box
CG7597	FBgn0037093	FBgn0037093	PF00069	Pkinase
CG14805	FBgn0023514	FBgn0023514	PF00400	WD40
CG7595	FBgn0000317	FBgn0000317	PF00373,PF00612,PF00063,PF00784	FERM_M,IQ,Myosin_head,MyTH4
CG3779	FBgn0002973	FBgn0002973	PF06311,PF00640	NumbF,PID
CG18729	FBgn0061476	FBgn0061476	PF09817	Zwilch
CG2095	FBgn0266672	FBgn0266672	PF04048	Sec8_exocyst
CG5266	FBgn0086134	FBgn0086134	PF00227,PF10584	Proteasome,Proteasome_A_N
CG2093	FBgn0033194	FBgn0033194	PF12624,PF06650,PF16908,PF16909,PF16910	Chorein_N,SHR-BD,VPS13,VPS13_C,VPS13_mid_rpt
CG2092	FBgn0261385	FBgn0261385	PF08174,PF16018,PF00169	Anillin,Anillin_N,PH
CG12396	FBgn0022069	FBgn0022069	PF05997	Nop52
CG5837	FBgn0011771	FBgn0011771	PF09735	Nckap1
CG5821	FBgn0022985	FBgn0022985	PF00013	KH_1
CG11198	FBgn0033246	FBgn0033246	PF08326,PF02785,PF00289,PF00364,PF01039,PF02786	ACC_central,Biotin_carb_C,Biotin_carb_N,Biotin_lipoyl,Carboxyl_trans,CPSase_L_D2
CG33193	FBgn0053193	FBgn0053193	PF00397	WW
CG5824	FBgn0010926	FBgn0010926	PF04147	Nop14
CG5794	FBgn0039214	FBgn0039214	PF00443	UCH
CG12499	FBgn0038968	FBgn0038968	PF16201,PF11707	NopRA1,Npa1
CG2009	FBgn0026262	FBgn0026262	PF07524,PF00628	Bromo_TP,PHD
CG10341	FBgn0032701	FBgn0032701	PF04410	Gar1
CG7704	FBgn0010356	FBgn0010356	PF04494,PF00400	TFIID_NTD2,WD40
CG42283	FBgn0259178	FBgn0259178	PF03372	Exo_endo_phos
CG12272	FBgn0036571	FBgn0036571	PF10266	Strumpellin
CG16974	FBgn0032479	FBgn0032479	PF13855	LRR_8
CG9246	FBgn0032925	FBgn0032925	PF03715	Noc2
CG1685	FBgn0015527	FBgn0015527	PF08144	CPL
CG31729	FBgn0051729	FBgn0051729	PF16212,PF16209	PhoLip_ATPase_C,PhoLip_ATPase_N
CG11897	FBgn0039644	FBgn0039644	PF00664,PF00005	ABC_membrane,ABC_tran
CG3443	FBgn0003048	FBgn0003048	PF05041	Pecanex_C
CG1519	FBgn0023175	FBgn0023175	PF00227,PF10584	Proteasome,Proteasome_A_N
CG42236	FBgn0262114	FBgn0262114	PF10607,PF00622	CTLH,SPRY
CG11107	FBgn0033160	FBgn0033160	PF00270,PF04408,PF00271,PF07717	DEAD,HA2,Helicase_C,OB_NTP_bind
CG1453	FBgn0030268	FBgn0030268	PF00225	Kinesin
CG6315	FBgn0000662	FBgn0000662	PF17098	Wtap
CG14200	FBgn0031023	FBgn0031023	PF00855	PWWP
CG8545	FBgn0033741	FBgn0033741	PF01189,PF17125	Methyltr_RsmB-F,Methyltr_RsmF_N
CG18214	FBgn0024277	FBgn0024277	PF00621,PF00435	RhoGEF,Spectrin
CG8383	FBgn0037737	FBgn0037737	PF04696	Pinin_SDK_memA
CG10042	FBgn0038016	FBgn0038016	PF01429,PF05485	MBD,THAP
CG45186	FBgn0266696	FBgn0266696	PF02209	VHP
CG8384	FBgn0001139	FBgn0001139	PF03920,PF00400	TLE_N,WD40
CG32165	FBgn0042178	FBgn0042178	PF03810	IBN_N
CG32164	FBgn0042177	FBgn0042177	PF03810	IBN_N
CG11621	FBgn0015278	FBgn0015278	PF00168,PF00454,PF00792,PF00794,PF00613,PF00787	C2,PI3_PI4_kinase,PI3K_C2,PI3K_rbd,PI3Ka,PX
CG10689	FBgn0086444	FBgn0086444	PF04408,PF00271,PF07717	HA2,Helicase_C,OB_NTP_bind
CG4202	FBgn0029755	FBgn0029755	PF09368,PF04000	Sas10,Sas10_Utp3
CG3251	FBgn0031622	FBgn0031622	PF02338	OTU
CG6551	FBgn0001079	FBgn0001079	PF00069	Pkinase
CG6493	FBgn0034246	FBgn0034246	PF00270,PF03368,PF00035,PF00271,PF02170,PF00636	DEAD,Dicer_dimer,dsrm,Helicase_C,PAZ,Ribonuclease_3
CG4994	FBgn0026409	FBgn0026409	PF00153	Mito_carr
CG14472	FBgn0011230	FBgn0011230	PF13764,PF02207	E3_UbLigase_R4,zf-UBR
CG4853	FBgn0034230	FBgn0034230	PF00617	RasGEF
CG17514	FBgn0039959	FBgn0039959	PF02985	HEAT
CG3733	FBgn0250786	FBgn0250786	PF00385,PF13907,PF00271,PF00176	Chromo,DUF4208,Helicase_C,SNF2_N
CG30349	FBgn0050349	FBgn0050349	PF04003	Utp12
CG3329	FBgn0023174	FBgn0023174	PF12465,PF00227	Pr_beta_C,Proteasome
CG1708	FBgn0000352	FBgn0000352	PF00225	Kinesin
CG3637	FBgn0025865	FBgn0025865	PF02218,PF14604	HS1_rep,SH3_9
CG9696	FBgn0020306	FBgn0020306	PF00271,PF07529,PF00176	Helicase_C,HSA,SNF2_N
CG12359	FBgn0027603	FBgn0027603	PF02902	Peptidase_C48
CG15154	FBgn0041184	FBgn0041184	PF00017,PF07525	SH2,SOCS_box
CG5451	FBgn0038666	FBgn0038666	PF00400	WD40
CG9667	FBgn0037550	FBgn0037550	PF06246	Isy1
CG7035	FBgn0022942	FBgn0022942	PF02854,PF09088,PF09090	MIF4G,MIF4G_like,MIF4G_like_2
CG6137	FBgn0000146	FBgn0000146	PF02170,PF02171	PAZ,Piwi
CG2048	FBgn0002413	FBgn0002413	PF00069	Pkinase
CG18076	FBgn0013733	FBgn0013733	PF00307,PF02187,PF00435,PF00681	CH,GAS2,Spectrin,Plectin
CG10149	FBgn0028689	FBgn0028689	PF01399	PCI
CG12750	FBgn0086707	FBgn0086707	PF02847	MA3
CG2691	FBgn0030504	FBgn0030504	PF08161	NUC173
CG12532	FBgn0010380	FBgn0010380	PF01602,PF02883,PF09066	Adaptin_N,Alpha_adaptinC2,B2-adapt-app_C
CG9446	FBgn0265935	FBgn0265935	PF08953,PF00400	DUF1899,WD40
CG42797	FBgn0261931	FBgn0261931	PF00632,PF00397	HECT,WW
CG5092	FBgn0021796	FBgn0021796	PF11865,PF02259,PF02260,PF08771,PF00454	DUF3385,FAT,FATC,FRB_dom,PI3_PI4_kinase
CG1451	FBgn0015589	FBgn0015589	PF05972,PF05923,PF00514	APC_15aa,APC_r,Arm
CG6292	FBgn0025455	FBgn0025455	PF00134	Cyclin_N
CG1800	FBgn0039861	FBgn0039861	PF00035	dsrm
CG5252	FBgn0037894	FBgn0037894	PF03810	IBN_N
CG8611	FBgn0027602	FBgn0027602	PF00270,PF13959,PF00271	DEAD,DUF4217,Helicase_C
CG13366	FBgn0025633	FBgn0025633	PF00307	CH
CG42641	FBgn0261396	FBgn0261396	PF01399,PF08375	PCI,Rpn3_C
CG1412	FBgn0031118	FBgn0031118	PF00595,PF00620	PDZ,RhoGAP
CG34407	FBgn0085436	FBgn0085436	PF16415,PF16418,PF16417,PF12842,PF04054	CNOT1_CAF1_bind,CNOT1_HEAT,CNOT1_TTP_bind,DUF3819,Not1
CG11228	FBgn0261456	FBgn0261456	PF11629,PF00069	Mst1_SARAH,Pkinase
CG6045	FBgn0038349	FBgn0038349	PF01315,PF02738,PF03450,PF00941,PF01799	Ald_Xan_dh_C,Ald_Xan_dh_C2,CO_deh_flav_C,FAD_binding_5,Fer2_2
CG6509	FBgn0032363	FBgn0032363	PF00625,PF00595	Guanylate_kin,PDZ
CG14650	FBgn0037252	FBgn0037252	PF00226,PF14901	DnaJ,Jiv90
CG8222	FBgn0032006	FBgn0032006	PF07679,PF07714,PF07686	I-set,Pkinase_Tyr,V-set
CG4244	FBgn0003557	FBgn0003557	PF00168,PF00632,PF00397	C2,HECT,WW
CG5009	FBgn0027572	FBgn0027572	PF01756,PF02770,PF14749	ACOX,Acyl-CoA_dh_M,Acyl-CoA_ox_N
CG2903	FBgn0031450	FBgn0031450	PF01363,PF12210,PF00790	FYVE,Hrs_helical,VHS
CG6815	FBgn0040237	FBgn0040237	PF00004,PF12037	AAA,DUF3523
CG4320	FBgn0029840	FBgn0029840	PF14538	Raptor_N
CG11665	FBgn0033028	FBgn0033028	PF07690	MFS_1
CG16932	FBgn0035060	FBgn0035060	PF12763	EF-hand_4
CG1569	FBgn0003268	FBgn0003268	PF10493	Rod_C
CG6617	FBgn0030944	FBgn0030944	PF10607,PF08513	CTLH,LisH
CG6343	FBgn0019957	FBgn0019957	PF01712	dNK
CG11130	FBgn0020909	FBgn0020909	PF01137,PF05189	RTC,RTC_insert
CG17838	FBgn0038826	FBgn0038826	PF00076	RRM_1
CG1489	FBgn0020369	FBgn0020369	PF00004	AAA
CG6593	FBgn0003134	FBgn0003134	PF00149,PF16891	Metallophos,STPPase_N
CG8833	FBgn0036386	FBgn0036386	PF07713,PF01585	DUF1604,G-patch
CG7955	FBgn0035244	FBgn0035244	PF00664,PF00005	ABC_membrane,ABC_tran
CG5179	FBgn0019949	FBgn0019949	PF00069	Pkinase
CG5178	FBgn0000047	FBgn0000047	PF00022	Actin
CG4886	FBgn0028382	FBgn0028382	PF00160,PF00076	Pro_isomerase,RRM_1
CG4887	FBgn0031318	FBgn0031318	PF01585,PF00076	G-patch,RRM_1
CG3209	FBgn0034971	FBgn0034971	PF01553	Acyltransferase
CG3164	FBgn0025683	FBgn0025683	PF01061,PF00005	ABC2_membrane,ABC_tran
CG18522	FBgn0267408	FBgn0267408	PF01315,PF02738,PF03450,PF00941,PF00111,PF01799	Ald_Xan_dh_C,Ald_Xan_dh_C2,CO_deh_flav_C,FAD_binding_5,Fer2,Fer2_2
CG13425	FBgn0267791	FBgn0267791	PF00013	KH_1
CG15445	FBgn0031161	FBgn0031161	PF00627	UBA
CG33505	FBgn0053505	FBgn0053505	PF00400	WD40
CG4376	FBgn0000667	FBgn0000667	PF00307,PF13405,PF08726,PF00435	CH,EF-hand_6,EFhand_Ca_insen,Spectrin
CG11290	FBgn0034975	FBgn0034975	PF01853	MOZ_SAS
CG5972	FBgn0284255	FBgn0284255	PF05856	ARPC4
CG7441	FBgn0036763	FBgn0036763	PF00579	tRNA-synt_1b
CG4618	FBgn0035589	FBgn0035589	PF03357	Snf7
CG7885	FBgn0026373	FBgn0026373	PF01000,PF01193	RNA_pol_A_bac,RNA_pol_L
CG17494	FBgn0040011	FBgn0040011	PF00498	FHA
CG3666	FBgn0034094	FBgn0034094	PF00405	Transferrin
CG17492	FBgn0086442	FBgn0086442	PF12796,PF06701,PF00569	Ank_2,MIB_HERC2,ZZ
CG2247	FBgn0030320	FBgn0030320	PF00646	F-box

## Sheet: F. Fly motif-domain
Bait(Annotation Id)	Bait(Flybase Id)	Bait(Symbol)	ELM_motif_bait	FunctionSite	Description	Prey(Annotation Id)	Prey(Flybase Id)	Prey(Symbol)	PfamDomain_prey	Pfam_domain_prey_name
CG18746	FBgn0042103	CG18746	DOC_MAPK_gen_1	MAPK docking motifs	MAPK interacting molecules (e.g. MAPKKs, substrates, phosphatases) carry docking motif that help to regulate specific interaction in the MAPK cascade. The classic motif approximates (R/K)xxxx#x# where # is a hydrophobic residue.	CG7028	FBgn0027587	CG7028	PF00069	Pkinase
CG18746	FBgn0042103	CG18746	DOC_MAPK_gen_1	MAPK docking motifs	MAPK interacting molecules (e.g. MAPKKs, substrates, phosphatases) carry docking motif that help to regulate specific interaction in the MAPK cascade. The classic motif approximates (R/K)xxxx#x# where # is a hydrophobic residue.	CG7597	FBgn0037093	Cdk12	PF00069	Pkinase
CG18746	FBgn0042103	CG18746	DOC_MAPK_gen_1	MAPK docking motifs	MAPK interacting molecules (e.g. MAPKKs, substrates, phosphatases) carry docking motif that help to regulate specific interaction in the MAPK cascade. The classic motif approximates (R/K)xxxx#x# where # is a hydrophobic residue.	CG4268	FBgn0016696	Pitslre	PF00069	Pkinase
CG18746	FBgn0042103	CG18746	LIG_FHA_2	FHA phosphopeptide ligands	Phosphothreonine motif binding a subset of FHA domains that have a preference for an acidic amino acid at the pT+3 position.	CG1135	FBgn0263832	Rcd5	PF00498	FHA
CG18746	FBgn0042103	CG18746	MOD_NEK2_1	NEK2 phosphorylation site	NEK2 phosphorylation motif with preferred Phe, Leu or Met in the -3 position to compensate for less favorable residues in the +1 and +2 position.	CG7028	FBgn0027587	CG7028	PF00069	Pkinase
CG18746	FBgn0042103	CG18746	MOD_NEK2_1	NEK2 phosphorylation site	NEK2 phosphorylation motif with preferred Phe, Leu or Met in the -3 position to compensate for less favorable residues in the +1 and +2 position.	CG7597	FBgn0037093	Cdk12	PF00069	Pkinase
CG18746	FBgn0042103	CG18746	MOD_NEK2_1	NEK2 phosphorylation site	NEK2 phosphorylation motif with preferred Phe, Leu or Met in the -3 position to compensate for less favorable residues in the +1 and +2 position.	CG4268	FBgn0016696	Pitslre	PF00069	Pkinase
CG18746	FBgn0042103	CG18746	MOD_PKA_1	PKA Phosphorylation site	Main preference for PKA-type AGC kinase phosphorylation.	CG7028	FBgn0027587	CG7028	PF00069	Pkinase
CG18746	FBgn0042103	CG18746	MOD_PKA_1	PKA Phosphorylation site	Main preference for PKA-type AGC kinase phosphorylation.	CG7597	FBgn0037093	Cdk12	PF00069	Pkinase
CG18746	FBgn0042103	CG18746	MOD_PKA_1	PKA Phosphorylation site	Main preference for PKA-type AGC kinase phosphorylation.	CG4268	FBgn0016696	Pitslre	PF00069	Pkinase
CG18745	FBgn0042102	CG18745	LIG_WW_1	WW domain ligands	PPXY is the motif recognized by WW domains of Group I	CG42797	FBgn0261931	CG42797	PF00397	WW
CG1105	FBgn0037465	CG1105	LIG_SH2_GRB2	SH2 ligand	GRB2-like Src Homology 2 (SH2) domains binding motif.	CG4257	FBgn0016917	Stat92E	PF00017	SH2
CG1105	FBgn0037465	CG1105	LIG_SH2_GRB2	SH2 ligand	GRB2-like Src Homology 2 (SH2) domains binding motif.	CG7893	FBgn0040068	Vav	PF00017	SH2
CG1105	FBgn0037465	CG1105	LIG_SH2_GRB2	SH2 ligand	GRB2-like Src Homology 2 (SH2) domains binding motif.	CG15154	FBgn0041184	Socs36E	PF00017	SH2
CG1105	FBgn0037465	CG1105	MOD_PIKK_1	PIKK phosphorylation site	(ST)Q motif which is phosphorylated by PIKK family members.	CG5092	FBgn0021796	Tor	PF00454	PI3_PI4_kinase
CG1105	FBgn0037465	CG1105	MOD_PIKK_1	PIKK phosphorylation site	(ST)Q motif which is phosphorylated by PIKK family members.	CG33554	FBgn0053554	Nipped-A	PF00454	PI3_PI4_kinase
CG14696	FBgn0037853	CG14696	LIG_Pex14_1	Pex14 ligand motif	Wxxx[FY] motifs present in N-terminal half of Pex5 bind to Pex13 and Pex14 at peroxisomal and glycosomal membranes to facilitate entrance of PTS1 cargo proteins into the organellar lumen.	CG6757	FBgn0040475	SH3PX1	PF00018	SH3_1
CG14696	FBgn0037853	CG14696	LIG_SH3_1	SH3 ligand	This is the motif recognized by class I SH3 domains	CG6757	FBgn0040475	SH3PX1	PF00018	SH3_1
CG14696	FBgn0037853	CG14696	LIG_SH3_2	SH3 ligand	This is the motif recognized by class II SH3 domains	CG6757	FBgn0040475	SH3PX1	PF00018	SH3_1
CG14696	FBgn0037853	CG14696	MOD_CDK_SPxK_1	CDK Phosphorylation Site	Canonical version of the CDK phosphorylation site which shows specificity towards a lysine/arginine residue at the [ST]+3 position.	CG2028	FBgn0015024	CkIalpha	PF00069	Pkinase
CG14696	FBgn0037853	CG14696	MOD_NEK2_1	NEK2 phosphorylation site	NEK2 phosphorylation motif with preferred Phe, Leu or Met in the -3 position to compensate for less favorable residues in the +1 and +2 position.	CG2028	FBgn0015024	CkIalpha	PF00069	Pkinase
CG14696	FBgn0037853	CG14696	MOD_NEK2_2	NEK2 phosphorylation site	NEK2 phosphorylation motif with specific set of residues in the +1 and +2 position to compensate for less favorable residues in the -3 position.	CG2028	FBgn0015024	CkIalpha	PF00069	Pkinase
CG2993	FBgn0037521	CG2993	DEG_APCC_DBOX_1	APCC-binding Destruction motifs	An RxxL-based motif that binds to the Cdh1 and Cdc20 components of APC/C thereby targeting the protein for destruction in a cell cycle dependent manner	CG8001	FBgn0035268	CG8001	PF00400	WD40
CG2993	FBgn0037521	CG2993	DEG_SCF_FBW7_1	SCF ubiquitin ligase binding Phosphodegrons	The TPxxS phospho-dependent degron binds the FBW7 F box proteins of the SCF (Skp1_Cullin-Fbox) complex.	CG8001	FBgn0035268	CG8001	PF00400	WD40
CG2993	FBgn0037521	CG2993	LIG_SH2_SRC	SH2 ligand	Src-family Src Homology 2 (SH2) domains binding motif.	CG7893	FBgn0040068	Vav	PF00017	SH2
CG2993	FBgn0037521	CG2993	LIG_SH2_STAT5	SH2 ligand	STAT5 Src Homology 2 (SH2) domain binding motif.	CG7893	FBgn0040068	Vav	PF00017	SH2
CG2993	FBgn0037521	CG2993	LIG_WW_1	WW domain ligands	PPXY is the motif recognized by WW domains of Group I	CG42797	FBgn0261931	CG42797	PF00397	WW
CG2993	FBgn0037521	CG2993	LIG_WW_1	WW domain ligands	PPXY is the motif recognized by WW domains of Group I	CG42279	FBgn0259174	Nedd4	PF00397	WW
CG2993	FBgn0037521	CG2993	LIG_WW_1	WW domain ligands	PPXY is the motif recognized by WW domains of Group I	CG4244	FBgn0003557	Su(dx)	PF00397	WW
CG2993	FBgn0037521	CG2993	TRG_ER_diArg_1	di Arginine retention/retrieving signal	The di-Arg ER retention motif is defined by two consecutive arginine residues (RR) or with a single residue insertion (RXR). The motif is completed by an adjacent hydrophobic/arginine residue which may be on either side of the Arg pair.	CG8001	FBgn0035268	CG8001	PF00400	WD40
CG7047	FBgn0035103	Vdup1	LIG_PDZ_Class_2	PDZ ligands	The C-terminal class 2 PDZ-binding motif is classically represented by a pattern such as (VYF)X(VIL)*	CG18361	FBgn0000499	dsh	PF00595	PDZ
CG7047	FBgn0035103	Vdup1	LIG_WRPW_2	WRPW motif	The WRPW motif mediates recruitment of transcriptional co-repressors of the Groucho/transducin-like enhancer-of-split (TLE) family. LIG_WRPW_2 is not restricted to the C-terminus (in contrast to LIG_WRPW_1).	CG8384	FBgn0001139	gro	PF00400	WD40
CG4674	FBgn0037856	Leash	LIG_FHA_1	FHA phosphopeptide ligands	Phosphothreonine motif binding a subset of FHA domains that show a preference for a large aliphatic amino acid at the pT+3 position.	CG17494	FBgn0040011	Slmap	PF00498	FHA
CG4674	FBgn0037856	Leash	LIG_SH2_STAT5	SH2 ligand	STAT5 Src Homology 2 (SH2) domain binding motif.	CG7893	FBgn0040068	Vav	PF00017	SH2
CG4674	FBgn0037856	Leash	LIG_SH3_1	SH3 ligand	This is the motif recognized by class I SH3 domains	CG32082	FBgn0052082	IRSp53	PF00018	SH3_1
CG4674	FBgn0037856	Leash	LIG_SH3_1	SH3 ligand	This is the motif recognized by class I SH3 domains	CG6757	FBgn0040475	SH3PX1	PF00018	SH3_1
CG4674	FBgn0037856	Leash	LIG_SH3_2	SH3 ligand	This is the motif recognized by class II SH3 domains	CG32082	FBgn0052082	IRSp53	PF00018	SH3_1
CG4674	FBgn0037856	Leash	LIG_SH3_2	SH3 ligand	This is the motif recognized by class II SH3 domains	CG6757	FBgn0040475	SH3PX1	PF00018	SH3_1
CG4674	FBgn0037856	Leash	LIG_SH3_2	SH3 ligand	This is the motif recognized by class II SH3 domains	CG7893	FBgn0040068	Vav	PF14604	SH3_9
CG4674	FBgn0037856	Leash	LIG_WW_1	WW domain ligands	PPXY is the motif recognized by WW domains of Group I	CG4943	FBgn0029006	Smurf	PF00397	WW
CG4674	FBgn0037856	Leash	LIG_WW_1	WW domain ligands	PPXY is the motif recognized by WW domains of Group I	CG42279	FBgn0259174	Nedd4	PF00397	WW
CG4674	FBgn0037856	Leash	LIG_WW_1	WW domain ligands	PPXY is the motif recognized by WW domains of Group I	CG42797	FBgn0261931	CG42797	PF00397	WW
CG4674	FBgn0037856	Leash	LIG_WW_1	WW domain ligands	PPXY is the motif recognized by WW domains of Group I	CG4244	FBgn0003557	Su(dx)	PF00397	WW
CG4674	FBgn0037856	Leash	LIG_WW_1	WW domain ligands	PPXY is the motif recognized by WW domains of Group I	CG4005	FBgn0034970	yki	PF00397	WW
CG4674	FBgn0037856	Leash	LIG_WW_1	WW domain ligands	PPXY is the motif recognized by WW domains of Group I	CG33967	FBgn0262127	kibra	PF00397	WW
CG4674	FBgn0037856	Leash	LIG_WW_1	WW domain ligands	PPXY is the motif recognized by WW domains of Group I	CG33193	FBgn0053193	sav	PF00397	WW
CG4674	FBgn0037856	Leash	LIG_WW_3	WW domain ligands	WW domain of group III binding motif	CG4943	FBgn0029006	Smurf	PF00397	WW
CG4674	FBgn0037856	Leash	LIG_WW_3	WW domain ligands	WW domain of group III binding motif	CG42279	FBgn0259174	Nedd4	PF00397	WW
CG4674	FBgn0037856	Leash	LIG_WW_3	WW domain ligands	WW domain of group III binding motif	CG42797	FBgn0261931	CG42797	PF00397	WW
CG4674	FBgn0037856	Leash	LIG_WW_3	WW domain ligands	WW domain of group III binding motif	CG4244	FBgn0003557	Su(dx)	PF00397	WW
CG4674	FBgn0037856	Leash	LIG_WW_3	WW domain ligands	WW domain of group III binding motif	CG4005	FBgn0034970	yki	PF00397	WW
CG4674	FBgn0037856	Leash	LIG_WW_3	WW domain ligands	WW domain of group III binding motif	CG33967	FBgn0262127	kibra	PF00397	WW
CG4674	FBgn0037856	Leash	LIG_WW_3	WW domain ligands	WW domain of group III binding motif	CG33193	FBgn0053193	sav	PF00397	WW
CG4674	FBgn0037856	Leash	MOD_CDK_SPK_2	CDK Phosphorylation Site	Short version of the CDK phosphorylation site which shows specificity towards a lysine/arginine residue at the [ST] +2 position.	CG2028	FBgn0015024	CkIalpha	PF00069	Pkinase
CG4674	FBgn0037856	Leash	MOD_CDK_SPK_2	CDK Phosphorylation Site	Short version of the CDK phosphorylation site which shows specificity towards a lysine/arginine residue at the [ST] +2 position.	CG6551	FBgn0001079	fu	PF00069	Pkinase
CG4674	FBgn0037856	Leash	MOD_CDK_SPK_2	CDK Phosphorylation Site	Short version of the CDK phosphorylation site which shows specificity towards a lysine/arginine residue at the [ST] +2 position.	CG11228	FBgn0261456	hpo	PF00069	Pkinase
CG4674	FBgn0037856	Leash	MOD_CDK_SPK_2	CDK Phosphorylation Site	Short version of the CDK phosphorylation site which shows specificity towards a lysine/arginine residue at the [ST] +2 position.	CG17520	FBgn0264492	CkIIalpha	PF00069	Pkinase
CG4674	FBgn0037856	Leash	MOD_CDK_SPK_2	CDK Phosphorylation Site	Short version of the CDK phosphorylation site which shows specificity towards a lysine/arginine residue at the [ST] +2 position.	CG2048	FBgn0002413	dco	PF00069	Pkinase
CG4674	FBgn0037856	Leash	MOD_CDK_SPK_2	CDK Phosphorylation Site	Short version of the CDK phosphorylation site which shows specificity towards a lysine/arginine residue at the [ST] +2 position.	CG12306	FBgn0003124	polo	PF00069	Pkinase
CG4674	FBgn0037856	Leash	MOD_CDK_SPK_2	CDK Phosphorylation Site	Short version of the CDK phosphorylation site which shows specificity towards a lysine/arginine residue at the [ST] +2 position.	CG7597	FBgn0037093	Cdk12	PF00069	Pkinase
CG4674	FBgn0037856	Leash	MOD_CDK_SPK_2	CDK Phosphorylation Site	Short version of the CDK phosphorylation site which shows specificity towards a lysine/arginine residue at the [ST] +2 position.	CG42320	FBgn0265998	Doa	PF00069	Pkinase
CG4674	FBgn0037856	Leash	MOD_CDK_SPK_2	CDK Phosphorylation Site	Short version of the CDK phosphorylation site which shows specificity towards a lysine/arginine residue at the [ST] +2 position.	CG4268	FBgn0016696	Pitslre	PF00069	Pkinase
CG4674	FBgn0037856	Leash	MOD_CDK_SPK_2	CDK Phosphorylation Site	Short version of the CDK phosphorylation site which shows specificity towards a lysine/arginine residue at the [ST] +2 position.	CG5179	FBgn0019949	Cdk9	PF00069	Pkinase
CG4674	FBgn0037856	Leash	MOD_CDK_SPxxK_3	CDK Phosphorylation Site	Longer version of the CDK phosphorylation site which shows specificity towards a lysine/arginine residue at position +4 after the phospho-Ser/Thr	CG2028	FBgn0015024	CkIalpha	PF00069	Pkinase
CG4674	FBgn0037856	Leash	MOD_CDK_SPxxK_3	CDK Phosphorylation Site	Longer version of the CDK phosphorylation site which shows specificity towards a lysine/arginine residue at position +4 after the phospho-Ser/Thr	CG6551	FBgn0001079	fu	PF00069	Pkinase
CG4674	FBgn0037856	Leash	MOD_CDK_SPxxK_3	CDK Phosphorylation Site	Longer version of the CDK phosphorylation site which shows specificity towards a lysine/arginine residue at position +4 after the phospho-Ser/Thr	CG11228	FBgn0261456	hpo	PF00069	Pkinase
CG4674	FBgn0037856	Leash	MOD_CDK_SPxxK_3	CDK Phosphorylation Site	Longer version of the CDK phosphorylation site which shows specificity towards a lysine/arginine residue at position +4 after the phospho-Ser/Thr	CG17520	FBgn0264492	CkIIalpha	PF00069	Pkinase
CG4674	FBgn0037856	Leash	MOD_CDK_SPxxK_3	CDK Phosphorylation Site	Longer version of the CDK phosphorylation site which shows specificity towards a lysine/arginine residue at position +4 after the phospho-Ser/Thr	CG2048	FBgn0002413	dco	PF00069	Pkinase
CG4674	FBgn0037856	Leash	MOD_CDK_SPxxK_3	CDK Phosphorylation Site	Longer version of the CDK phosphorylation site which shows specificity towards a lysine/arginine residue at position +4 after the phospho-Ser/Thr	CG12306	FBgn0003124	polo	PF00069	Pkinase
CG4674	FBgn0037856	Leash	MOD_CDK_SPxxK_3	CDK Phosphorylation Site	Longer version of the CDK phosphorylation site which shows specificity towards a lysine/arginine residue at position +4 after the phospho-Ser/Thr	CG7597	FBgn0037093	Cdk12	PF00069	Pkinase
CG4674	FBgn0037856	Leash	MOD_CDK_SPxxK_3	CDK Phosphorylation Site	Longer version of the CDK phosphorylation site which shows specificity towards a lysine/arginine residue at position +4 after the phospho-Ser/Thr	CG42320	FBgn0265998	Doa	PF00069	Pkinase
CG4674	FBgn0037856	Leash	MOD_CDK_SPxxK_3	CDK Phosphorylation Site	Longer version of the CDK phosphorylation site which shows specificity towards a lysine/arginine residue at position +4 after the phospho-Ser/Thr	CG4268	FBgn0016696	Pitslre	PF00069	Pkinase
CG4674	FBgn0037856	Leash	MOD_CDK_SPxxK_3	CDK Phosphorylation Site	Longer version of the CDK phosphorylation site which shows specificity towards a lysine/arginine residue at position +4 after the phospho-Ser/Thr	CG5179	FBgn0019949	Cdk9	PF00069	Pkinase
CG4674	FBgn0037856	Leash	MOD_NEK2_1	NEK2 phosphorylation site	NEK2 phosphorylation motif with preferred Phe, Leu or Met in the -3 position to compensate for less favorable residues in the +1 and +2 position.	CG2028	FBgn0015024	CkIalpha	PF00069	Pkinase
CG4674	FBgn0037856	Leash	MOD_NEK2_1	NEK2 phosphorylation site	NEK2 phosphorylation motif with preferred Phe, Leu or Met in the -3 position to compensate for less favorable residues in the +1 and +2 position.	CG6551	FBgn0001079	fu	PF00069	Pkinase
CG4674	FBgn0037856	Leash	MOD_NEK2_1	NEK2 phosphorylation site	NEK2 phosphorylation motif with preferred Phe, Leu or Met in the -3 position to compensate for less favorable residues in the +1 and +2 position.	CG11228	FBgn0261456	hpo	PF00069	Pkinase
CG4674	FBgn0037856	Leash	MOD_NEK2_1	NEK2 phosphorylation site	NEK2 phosphorylation motif with preferred Phe, Leu or Met in the -3 position to compensate for less favorable residues in the +1 and +2 position.	CG17520	FBgn0264492	CkIIalpha	PF00069	Pkinase
CG4674	FBgn0037856	Leash	MOD_NEK2_1	NEK2 phosphorylation site	NEK2 phosphorylation motif with preferred Phe, Leu or Met in the -3 position to compensate for less favorable residues in the +1 and +2 position.	CG2048	FBgn0002413	dco	PF00069	Pkinase
CG4674	FBgn0037856	Leash	MOD_NEK2_1	NEK2 phosphorylation site	NEK2 phosphorylation motif with preferred Phe, Leu or Met in the -3 position to compensate for less favorable residues in the +1 and +2 position.	CG12306	FBgn0003124	polo	PF00069	Pkinase
CG4674	FBgn0037856	Leash	MOD_NEK2_1	NEK2 phosphorylation site	NEK2 phosphorylation motif with preferred Phe, Leu or Met in the -3 position to compensate for less favorable residues in the +1 and +2 position.	CG7597	FBgn0037093	Cdk12	PF00069	Pkinase
CG4674	FBgn0037856	Leash	MOD_NEK2_1	NEK2 phosphorylation site	NEK2 phosphorylation motif with preferred Phe, Leu or Met in the -3 position to compensate for less favorable residues in the +1 and +2 position.	CG42320	FBgn0265998	Doa	PF00069	Pkinase
CG4674	FBgn0037856	Leash	MOD_NEK2_1	NEK2 phosphorylation site	NEK2 phosphorylation motif with preferred Phe, Leu or Met in the -3 position to compensate for less favorable residues in the +1 and +2 position.	CG4268	FBgn0016696	Pitslre	PF00069	Pkinase
CG4674	FBgn0037856	Leash	MOD_NEK2_1	NEK2 phosphorylation site	NEK2 phosphorylation motif with preferred Phe, Leu or Met in the -3 position to compensate for less favorable residues in the +1 and +2 position.	CG5179	FBgn0019949	Cdk9	PF00069	Pkinase
CG4674	FBgn0037856	Leash	MOD_NEK2_2	NEK2 phosphorylation site	NEK2 phosphorylation motif with specific set of residues in the +1 and +2 position to compensate for less favorable residues in the -3 position.	CG2028	FBgn0015024	CkIalpha	PF00069	Pkinase
CG4674	FBgn0037856	Leash	MOD_NEK2_2	NEK2 phosphorylation site	NEK2 phosphorylation motif with specific set of residues in the +1 and +2 position to compensate for less favorable residues in the -3 position.	CG6551	FBgn0001079	fu	PF00069	Pkinase
CG4674	FBgn0037856	Leash	MOD_NEK2_2	NEK2 phosphorylation site	NEK2 phosphorylation motif with specific set of residues in the +1 and +2 position to compensate for less favorable residues in the -3 position.	CG11228	FBgn0261456	hpo	PF00069	Pkinase
CG4674	FBgn0037856	Leash	MOD_NEK2_2	NEK2 phosphorylation site	NEK2 phosphorylation motif with specific set of residues in the +1 and +2 position to compensate for less favorable residues in the -3 position.	CG17520	FBgn0264492	CkIIalpha	PF00069	Pkinase
CG4674	FBgn0037856	Leash	MOD_NEK2_2	NEK2 phosphorylation site	NEK2 phosphorylation motif with specific set of residues in the +1 and +2 position to compensate for less favorable residues in the -3 position.	CG2048	FBgn0002413	dco	PF00069	Pkinase
CG4674	FBgn0037856	Leash	MOD_NEK2_2	NEK2 phosphorylation site	NEK2 phosphorylation motif with specific set of residues in the +1 and +2 position to compensate for less favorable residues in the -3 position.	CG12306	FBgn0003124	polo	PF00069	Pkinase
CG4674	FBgn0037856	Leash	MOD_NEK2_2	NEK2 phosphorylation site	NEK2 phosphorylation motif with specific set of residues in the +1 and +2 position to compensate for less favorable residues in the -3 position.	CG7597	FBgn0037093	Cdk12	PF00069	Pkinase
CG4674	FBgn0037856	Leash	MOD_NEK2_2	NEK2 phosphorylation site	NEK2 phosphorylation motif with specific set of residues in the +1 and +2 position to compensate for less favorable residues in the -3 position.	CG42320	FBgn0265998	Doa	PF00069	Pkinase
CG4674	FBgn0037856	Leash	MOD_NEK2_2	NEK2 phosphorylation site	NEK2 phosphorylation motif with specific set of residues in the +1 and +2 position to compensate for less favorable residues in the -3 position.	CG4268	FBgn0016696	Pitslre	PF00069	Pkinase
CG4674	FBgn0037856	Leash	MOD_NEK2_2	NEK2 phosphorylation site	NEK2 phosphorylation motif with specific set of residues in the +1 and +2 position to compensate for less favorable residues in the -3 position.	CG5179	FBgn0019949	Cdk9	PF00069	Pkinase
CG4674	FBgn0037856	Leash	MOD_PIKK_1	PIKK phosphorylation site	(ST)Q motif which is phosphorylated by PIKK family members.	CG11621	FBgn0015278	Pi3K68D	PF00454	PI3_PI4_kinase
CG4674	FBgn0037856	Leash	MOD_PKA_2	PKA Phosphorylation site	Secondary preference for PKA-type AGC kinase phosphorylation.	CG2028	FBgn0015024	CkIalpha	PF00069	Pkinase
CG4674	FBgn0037856	Leash	MOD_PKA_2	PKA Phosphorylation site	Secondary preference for PKA-type AGC kinase phosphorylation.	CG6551	FBgn0001079	fu	PF00069	Pkinase
CG4674	FBgn0037856	Leash	MOD_PKA_2	PKA Phosphorylation site	Secondary preference for PKA-type AGC kinase phosphorylation.	CG11228	FBgn0261456	hpo	PF00069	Pkinase
CG4674	FBgn0037856	Leash	MOD_PKA_2	PKA Phosphorylation site	Secondary preference for PKA-type AGC kinase phosphorylation.	CG17520	FBgn0264492	CkIIalpha	PF00069	Pkinase
CG4674	FBgn0037856	Leash	MOD_PKA_2	PKA Phosphorylation site	Secondary preference for PKA-type AGC kinase phosphorylation.	CG2048	FBgn0002413	dco	PF00069	Pkinase
CG4674	FBgn0037856	Leash	MOD_PKA_2	PKA Phosphorylation site	Secondary preference for PKA-type AGC kinase phosphorylation.	CG12306	FBgn0003124	polo	PF00069	Pkinase
CG4674	FBgn0037856	Leash	MOD_PKA_2	PKA Phosphorylation site	Secondary preference for PKA-type AGC kinase phosphorylation.	CG7597	FBgn0037093	Cdk12	PF00069	Pkinase
CG4674	FBgn0037856	Leash	MOD_PKA_2	PKA Phosphorylation site	Secondary preference for PKA-type AGC kinase phosphorylation.	CG42320	FBgn0265998	Doa	PF00069	Pkinase
CG4674	FBgn0037856	Leash	MOD_PKA_2	PKA Phosphorylation site	Secondary preference for PKA-type AGC kinase phosphorylation.	CG4268	FBgn0016696	Pitslre	PF00069	Pkinase
CG4674	FBgn0037856	Leash	MOD_PKA_2	PKA Phosphorylation site	Secondary preference for PKA-type AGC kinase phosphorylation.	CG5179	FBgn0019949	Cdk9	PF00069	Pkinase
CG4674	FBgn0037856	Leash	TRG_ENDOCYTIC_2	Y-based sorting signal	Tyrosine-based sorting signal responsible for the interaction with mu subunit of AP (Adaptor Protein) complex	CG7057	FBgn0263351	AP-2mu	PF00928	Adap_comp_sub
CG18748	FBgn0042105	CG18748	DEG_SCF_FBW7_1	SCF ubiquitin ligase binding Phosphodegrons	The TPxxS phospho-dependent degron binds the FBW7 F box proteins of the SCF (Skp1_Cullin-Fbox) complex.	CG9446	FBgn0265935	coro	PF00400	WD40
CG18748	FBgn0042105	CG18748	DEG_SCF_FBW7_1	SCF ubiquitin ligase binding Phosphodegrons	The TPxxS phospho-dependent degron binds the FBW7 F box proteins of the SCF (Skp1_Cullin-Fbox) complex.	CG8978	FBgn0001961	Arpc1	PF00400	WD40
CG18748	FBgn0042105	CG18748	DOC_PP2B_LxvP_1	Calcineurin (PP2B)-docking motif LxvP	Docking motif in calcineurin substrates that binds at the interface of the catalytic CNA and regulatory CNB subunits.	CG5650	FBgn0004103	Pp1-87B	PF00149	Metallophos
CG18748	FBgn0042105	CG18748	DOC_PP2B_LxvP_1	Calcineurin (PP2B)-docking motif LxvP	Docking motif in calcineurin substrates that binds at the interface of the catalytic CNA and regulatory CNB subunits.	CG8472	FBgn0000253	Cam	PF13499	EF-hand_7
CG18748	FBgn0042105	CG18748	DOC_PP2B_LxvP_1	Calcineurin (PP2B)-docking motif LxvP	Docking motif in calcineurin substrates that binds at the interface of the catalytic CNA and regulatory CNB subunits.	CG6593	FBgn0003134	Pp1alpha-96A	PF00149	Metallophos
CG18748	FBgn0042105	CG18748	MOD_NEK2_1	NEK2 phosphorylation site	NEK2 phosphorylation motif with preferred Phe, Leu or Met in the -3 position to compensate for less favorable residues in the +1 and +2 position.	CG10522	FBgn0002466	sti	PF00069	Pkinase
CG18748	FBgn0042105	CG18748	MOD_SUMO_for_1	Sumoylation site	Motif recognised for modification by SUMO-1	CG15437	FBgn0027609	morgue	PF00179	UQ_con
CG10086	FBgn0037517	CG10086	CLV_NRD_NRD_1	NRD cleavage site	N-Arg dibasic convertase (NRD/Nardilysin) cleavage site (X-|-R-K or R-|-R-X).	CG2025	FBgn0030344	Nrd1	PF00675	Peptidase_M16
CG10086	FBgn0037517	CG10086	DEG_COP1_1	COP1 E3 ligase binding degron motif	A destruction motif interacts with the COP1 WD 40 domain for target ubiquitination and degradation.	CG14805	FBgn0023514	CG14805	PF00400	WD40
CG10086	FBgn0037517	CG10086	LIG_PTB_Apo_2	PTB ligand	These phosphorylation-independent motifs bind to Dab-like PTB domains. Binding is not driven by contacts at the 0 or FY position, but instead is dependent upon the large number of hydrophobic and hydrogen bond contacts between motif and domain.	CG3779	FBgn0002973	numb	PF00640	PID
CG10086	FBgn0037517	CG10086	LIG_PTB_Phospho_1	PTB ligand	This phosphorylation-dependent motif binds to Shc-like and IRS-like PTB domains. The pTyr is positioned within a highly basic-charged anchoring pocket. A hydrophobic residue -5 (compared to pY) increases the affinity of the interaction.	CG3779	FBgn0002973	numb	PF00640	PID
CG10086	FBgn0037517	CG10086	LIG_WW_1	WW domain ligands	PPXY is the motif recognized by WW domains of Group I	CG42797	FBgn0261931	CG42797	PF00397	WW
CG10086	FBgn0037517	CG10086	LIG_WW_1	WW domain ligands	PPXY is the motif recognized by WW domains of Group I	CG4943	FBgn0029006	Smurf	PF00397	WW
CG10086	FBgn0037517	CG10086	LIG_WW_1	WW domain ligands	PPXY is the motif recognized by WW domains of Group I	CG42279	FBgn0259174	Nedd4	PF00397	WW
CG10086	FBgn0037517	CG10086	MOD_CDK_SPK_2	CDK Phosphorylation Site	Short version of the CDK phosphorylation site which shows specificity towards a lysine/arginine residue at the [ST] +2 position.	CG6551	FBgn0001079	fu	PF00069	Pkinase
CG10086	FBgn0037517	CG10086	MOD_NEK2_1	NEK2 phosphorylation site	NEK2 phosphorylation motif with preferred Phe, Leu or Met in the -3 position to compensate for less favorable residues in the +1 and +2 position.	CG6551	FBgn0001079	fu	PF00069	Pkinase
CG10086	FBgn0037517	CG10086	TRG_ER_diArg_1	di Arginine retention/retrieving signal	The di-Arg ER retention motif is defined by two consecutive arginine residues (RR) or with a single residue insertion (RXR). The motif is completed by an adjacent hydrophobic/arginine residue which may be on either side of the Arg pair.	CG14805	FBgn0023514	CG14805	PF00400	WD40
CG10086	FBgn0037517	CG10086	TRG_NLS_MonoCore_2	NLS classical Nuclear Localization Signals	Monopartite variant of the classical basically charged NLS. Strong core version.	CG1451	FBgn0015589	Apc	PF00514	Arm
CG10086	FBgn0037517	CG10086	TRG_NLS_MonoExtC_3	NLS classical Nuclear Localization Signals	Monopartite variant of the classical basically charged NLS. C-extended version.	CG1451	FBgn0015589	Apc	PF00514	Arm
CG10086	FBgn0037517	CG10086	TRG_NLS_MonoExtN_4	NLS classical Nuclear Localization Signals	Monopartite variant of the classical basically charged NLS. N-extended version.	CG1451	FBgn0015589	Apc	PF00514	Arm
CG18744	FBgn0042101	CG18744	DEG_SCF_FBW7_2	SCF ubiquitin ligase binding Phosphodegrons	The TPxxE phospho-dependent degron binds the FBW7 F box proteins of the SCF (Skp1_Cullin-Fbox) complex.	CG33505	FBgn0053505	U3-55K	PF00400	WD40
CG18744	FBgn0042101	CG18744	TRG_ER_diArg_1	di Arginine retention/retrieving signal	The di-Arg ER retention motif is defined by two consecutive arginine residues (RR) or with a single residue insertion (RXR). The motif is completed by an adjacent hydrophobic/arginine residue which may be on either side of the Arg pair.	CG33505	FBgn0053505	U3-55K	PF00400	WD40
CG2641	FBgn0037518	CG2641	LIG_PTAP_UEV_1	UEV Domain binding PTAP motif	PTAP motif binds the N-terminal UEV domain of Tsg101.	CG9712	FBgn0036666	TSG101	PF05743	UEV
CG2641	FBgn0037518	CG2641	LIG_WW_1	WW domain ligands	PPXY is the motif recognized by WW domains of Group I	CG42797	FBgn0261931	CG42797	PF00397	WW
CG2641	FBgn0037518	CG2641	LIG_WW_1	WW domain ligands	PPXY is the motif recognized by WW domains of Group I	CG42279	FBgn0259174	Nedd4	PF00397	WW
CG2641	FBgn0037518	CG2641	LIG_WW_1	WW domain ligands	PPXY is the motif recognized by WW domains of Group I	CG4244	FBgn0003557	Su(dx)	PF00397	WW
CG2641	FBgn0037518	CG2641	MOD_PIKK_1	PIKK phosphorylation site	(ST)Q motif which is phosphorylated by PIKK family members.	CG33554	FBgn0053554	Nipped-A	PF00454	PI3_PI4_kinase
CG2641	FBgn0037518	CG2641	MOD_PIKK_1	PIKK phosphorylation site	(ST)Q motif which is phosphorylated by PIKK family members.	CG5092	FBgn0021796	Tor	PF00454	PI3_PI4_kinase
