# Supplementary material for: Comparative interactome analysis of α-arrestin families in human and Drosophila
Source: eLife. 2024 Jan 25;12:RP88328. doi: 10.7554/eLife.88328 (PMC10945707; doi:10.7554/eLife.88328)
Supplement: Supplementary file 5. — Results of enrichment test of Pfam domains in the interactome of each α-arrestin for human (A) and Drosophila (B). [file elife-88328-supp5.xlsx]

## Sheet: A. Human Pfam domain enrichment
Bait	Term	Pfam name	Collapse	Prey (HGNC ID)	Size	PValue	FDR
ARRDC5	PF00006	ATP-synt_ab	ATP synthase alpha and beta	ATP6V1A,ATP6V1B2	2	0.0145191	0.0331866
ARRDC5	PF02874	ATP-synt_ab_N	ATP synthase alpha and beta	ATP6V1A,ATP6V1B2	2	0.0145191	0.0331866
ARRDC5	PF01145	Band_7	Band_7	STOM,ERLIN1,ERLIN2,STOML2,FLOT1,FLOT2	6	3.0999e-11	1.32262e-09
ARRDC1	PF00168	C2	C2	WWP2,ITCH,WWP1,SMURF1,NEDD4,NEDD4L,HECW2	7	1.92118e-08	3.07389e-07
ARRDC3	PF00168	C2	C2	WWP1,C2CD5,ABR,BCR,NEDD4,RAB11FIP5,ITCH,ESYT2,NEDD4L	9	1.50806e-05	0.000137879
ARRDC2	PF00168	C2	C2	ITCH,WWP1,WWP2,NEDD4L,HECW2	5	0.000379668	0.00220898
TXNIP	PF00168	C2	C2	ITCH,WWP1,WWP2,NEDD4L	4	0.00512722	0.0172706
ARRDC4	PF00168	C2	C2	ITCH,NEDD4L,WWP1,WWP2	4	0.0142849	0.0331866
ARRDC3	PF08332	CaMKII_AD	CaMKII associated-domain	CAMK2D,CAMK2G	2	0.0301531	0.0499458
ARRDC3	PF00780	CNH	Citron homology (CNH)	TNIK,VPS39,MAP4K4	3	0.00816015	0.0242907
ARRDC3	PF04053	Coatomer_WDAD	Coatomer-WD associated region	COPB2,COPA	2	0.0151913	0.0335255
ARRDC3	PF03178	CPSF_A	CPSF-A	CPSF1,SF3B3	2	0.0301531	0.0499458
ARRDC3	PF08312	cwf21	cwf21	U2SURP,SRRM2	2	0.0227007	0.0440255
ARRDC4	PF16213	DCB	DCB	ARFGEF3,MON2	2	0.013989	0.0331866
ARRDC3	PF00270	DEAD	DEAD	DHX15,SNRNP200,DDX3X,DDX5,DHX30,DDX52,DDX50,EIF4A3,SKIV2L2,DDX17,DDX28	11	5.26658e-10	1.12354e-08													-
ARRDC4	PF09324	DUF1981	DUF1981	ARFGEF3,MON2	2	0.0174559	0.0372393
TXNIP	PF12057	DUF3538	DUF3538	BAG6,BAT3	2	0.00483377	0.0167222
ARRDC4	PF12057	DUF3538	DUF3538	BAG6,BAT3	2	0.0070188	0.0217682
ARRDC3	PF09068	EF-hand_2	EF-hand	UTRN,DMD,DTNA	3	0.00118341	0.00561025
ARRDC3	PF09069	EF-hand_3	EF-hand	UTRN,DMD,DTNA	3	0.00118341	0.00561025
ARRDC3	PF08736	FA	FERM adjacent (FA)	EPB41L4B,FARP2,EPB41L3	3	0.0042653	0.0151655
ARRDC2	PF08736	FA	FERM adjacent (FA)	EPB41L3,FARP2	2	0.0304357	0.0499458
ARRDC4	PF02259	FAT	FRAP,ATM,TRRAP	PRKDC,ATM	2	0.0243538	0.045178
ARRDC4	PF02260	FATC	FRAP,ATM,TRRAP C-terminal	PRKDC,ATM	2	0.0174559	0.0372393
ARRDC3	PF09380	FERM_C	FERM	EPB41L4B,PTPN13,FARP2,EPB41L3	4	0.00183547	0.0075787
ARRDC3	PF00373	FERM_M	FERM	EPB41L4B,PTPN13,FARP2,EPB41L3	4	0.0108413	0.0284963
ARRDC3	PF09379	FERM_N	FERM	EPB41L4B,PTPN13,FARP2,EPB41L3	4	0.00183547	0.0075787
ARRDC5	PF15975	Flot	Flotillin	FLOT1,FLOT2	2	0.00364922	0.0133457
ARRDC3	PF07842	GCFC	GCFC	PAXBP1,TFIP11	2	0.0301531	0.0499458
ARRDC3	PF01585	G-patch	G-patch	CHERP,GPATCH8,GPATCH1,RBM17,TFIP11	5	0.000196575	0.00131775
ARRDC1	PF00632	HECT	HECT	WWP2,ITCH,WWP1,SMURF1,NEDD4,NEDD4L,HECW2	7	1.39324e-12	8.91676e-11
ARRDC2	PF00632	HECT	HECT	ITCH,WWP1,HUWE1,WWP2,UBE3C,NEDD4L,HECW2	7	9.35039e-11	2.69664e-09
TXNIP	PF00632	HECT	HECT	ITCH,WWP1,HUWE1,WWP2,UBE3C,HERC2,NEDD4L	7	1.05337e-10	2.69664e-09
ARRDC4	PF00632	HECT	HECT	ITCH,HUWE1,NEDD4L,UBE3C,WWP1,WWP2,HERC2	7	1.06258e-09	1.943e-08
ARRDC3	PF00632	HECT	HECT	WWP1,UBE3C,NEDD4,ITCH,NEDD4L	5	8.73471e-05	0.000657672
ARRDC3	PF00271	Helicase_C	Helicase	DHX15,SNRNP200,DDX3X,DDX5,DHX30,DDX52,DDX50,EIF4A3,SKIV2L2,DDX17,DDX28	11	5.3034e-08	7.54262e-07
ARRDC4	PF03810	IBN_N	Importin-beta N-termain (IBN-N)	XPOT,IPO4,IPO9	3	0.00179952	0.0075787
ARRDC4	PF01485	IBR	In between ring fingers (IBR)	ANKIB1,RNF31,RBCK1	3	0.00124343	0.00568426
ARRDC1	PF00052	Laminin_B	Laminin	LAMA1,LAMA5,LAMC1	3	5.24008e-05	0.000447154
ARRDC1	PF00053	Laminin_EGF	Laminin	LAMB2,LAMA1,LAMA5,LAMC1	4	9.74429e-06	9.59438e-05
ARRDC1	PF06008	Laminin_I	Laminin	LAMA1,LAMA5	2	0.00614892	0.0196766
ARRDC1	PF06009	Laminin_II	Laminin	LAMA1,LAMA5	2	0.00614892	0.0196766
ARRDC1	PF00055	Laminin_N	Laminin	LAMB2,LAMA1,LAMA5,LAMC1	4	1.12289e-06	1.43729e-05
ARRDC3	PF00493	MCM	MCM	MCM5,MCM7,MCM3	3	0.00362721	0.0133457
ARRDC3	PF14551	MCM_N	MCM	MCM5,MCM7,MCM3	3	0.00118341	0.00561025
ARRDC3	PF17207	MCM_OB	MCM	MCM5,MCM7,MCM3	3	0.00200844	0.00803378
ARRDC4	PF00063	Myosin_head	Myosin_head	MYO1D,MYO1B,MYO6	3	0.0133996	0.0331866
ARRDC4	PF01851	PC_rep	Proteasome/cyclosome repeat	PSMD1,PSMD2	2	0.0105099	0.0284963
ARRDC3	PF00595	PDZ	PDZ	PTPN13,PDLIM5,SDCBP,PARD3,SNTB2,SCRIB	6	0.00714269	0.0217682
TXNIP	PF00675	Peptidase_M16	Peptidase	PMPCB,PMPCA	2	0.0215721	0.0437146
TXNIP	PF05193	Peptidase_M16_C	Peptidase	PMPCB,PMPCA	2	0.0215721	0.0437146
ARRDC5	PF16212	PhoLip_ATPase_C	ATPase	ATP11C,ATP11B	2	0.0288327	0.0499458
ARRDC5	PF16209	PhoLip_ATPase_N	ATPase	ATP11C,ATP11B	2	0.0270546	0.0494713
ARRDC4	PF00454	PI3_PI4_kinase	Phosphatidylinositol 3-/4-kinase	PRKDC,PI4KA,ATM	3	0.00347273	0.0133457
ARRDC3	PF00069	Pkinase	Pkinase	DYRK1A,CAMK2D,CAMK2G,CSNK2A2,CSNK2A1,TNIK,CDK5,CDK9,MAP4K4	9	0.013956	0.0331866
ARRDC4	PF00227	Proteasome	Proteasome	PSMA3,PSMB5,PSMB3,PSMB2	4	8.01703e-05	0.000641363
ARRDC3	PF04046	PSP	PSP	SF3B2,ZCCHC8	2	0.0227007	0.0440255
ARRDC3	PF00621	RhoGEF	RhoGEF	ARHGEF2,FARP2,ABR,BCR	4	0.02183	0.0437146
ARRDC3	PF07521	RMMBL	RMMBL	CPSF3,CPSF2	2	0.0301531	0.0499458
ARRDC3	PF00076	RRM_1	RNA recognition motif (RRM)-1	RBM15B,SPEN,SRSF7,SRSF1,U2AF2,RNPS1,RBM17,RBM15,U2SURP,ZNF638	10	0.000301062	0.00183504
ARRDC4	PF06470	SMC_hinge	Structural maintenance of chromosomes (SMC)	SMC2,SMC4	2	0.0277848	0.0499458
ARRDC4	PF02463	SMC_N	Structural maintenance of chromosomes (SMC)	SMC2,SMC4	2	0.0243538	0.045178
ARRDC3	PF07744	SPOC	SPOC	RBM15B,SPEN,RBM15	3	0.00084955	0.00453094
ARRDC3	PF15440	THRAP3_BCLAF1	THRAP3_BCLAF1	BCLAF1,THRAP3	2	0.0301531	0.0499458
ARRDC3	PF06068	TIP49	TBP-interacting protein (TIP) 49	RUVBL2,RUVBL1	2	0.0151913	0.0335255
ARRDC4	PF00240	ubiquitin	Ubiquitin	BAG6,UBL4A,BAT3	3	0.0144391	0.0331866
ARRDC5	PF01496	V_ATPase_I	ATPase	ATP6V0A1,ATP6V0A2	2	0.0109087	0.0284963
ARRDC3	PF00400	WD40	WD40	COPB2,WDR34,WDR36,WDR33,LLGL1,SMU1,WDR6,WDR82,COPA,WDR75	10	0.000205898	0.00131775
ARRDC1	PF00397	WW	WW	WWP2,ITCH,WWP1,SMURF1,NEDD4,NEDD4L,UTRN,HECW2	8	9.61067e-14	1.23017e-11
ARRDC3	PF00397	WW	WW	WWP1,UTRN,DMD,NEDD4,PRPF40A,ITCH,NEDD4L	7	1.30647e-06	1.52025e-05
ARRDC2	PF00397	WW	WW	ITCH,WWP1,WWP2,NEDD4L,HECW2	5	4.2809e-06	4.56629e-05
TXNIP	PF00397	WW	WW	ITCH,WWP1,WWP2,NEDD4L	4	0.000188677	0.00131775
ARRDC4	PF00397	WW	WW	ITCH,NEDD4L,WWP1,WWP2	4	0.000568766	0.00316531
ARRDC3	PF00643	zf-B_box	Zinc finger (ZF)	TRIM26,TRIM3,TRIM5,TRIM4	4	0.0233189	0.0445496
ARRDC3	PF00098	zf-CCHC	Zinc finger (ZF)	ZCCHC2,SRSF7,ZCCHC8	3	0.0218573	0.0437146
ARRDC2	PF13639	zf-RING_2	Zinc finger (ZF)	LTN1,PJA1,PJA2	3	0.00896118	0.0260689
TXNIP	PF13639	zf-RING_2	Zinc finger (ZF)	PJA1,PJA2,RLIM	3	0.00929631	0.0264428
ARRDC3	PF00569	ZZ	ZZ-type zinc finger	UTRN,DMD,DTNA	3	0.010033	0.0279179

## Sheet: B. Fly Pfam domain enrichment
Bait (Annotation Id)	Bait (FlybaseId)	Bait (Symbol)	Term	Pfam name	Collapse	Prey (Annotation Id)	Prey (FlybaseId)	Prey (Symbol)	Size	PValue	FDR
CG4674	FBgn0037856	Leash	PF00004	AAA	AAA	CG5289,CG16916,CG10370,CG6512,CG3455,CG6815,CG1489,CG2658	FBgn0015282,FBgn0028686,FBgn0028684,FBgn0036702,FBgn0028685,FBgn0040237,FBgn0020369,FBgn0024992	Rpt2,Rpt3,Rpt5,CG6512,Rpt4,bor,Rpt6,CG2658	8	1.18e-05	0.000205868
CG18748	FBgn0042105	CG18748	PF00022	Actin	Actin	CG7478,CG9901,CG5178,CG7558,CG10067	FBgn0000045,FBgn0011742,FBgn0000047,FBgn0262716,FBgn0000044	Act79B,Arp2,Act88F,Arp3,Act57B	5	3.03e-06	7.06e-05
CG4674	FBgn0037856	Leash	PF00168	C2	C2	CG4943,CG11621,CG42279,CG4244,CG33967	FBgn0029006,FBgn0015278,FBgn0259174,FBgn0003557,FBgn0262127	Smurf,Pi3K68D,Nedd4,Su(dx),kibra	5	0.0054856	0.027428
CG2641	FBgn0037518	CG2641	PF00168	C2	C2	CG42279,CG4244,CG34349	FBgn0259174,FBgn0003557,FBgn0266719	Nedd4,Su(dx),stac	3	0.0103894	0.0454535
CG2993	FBgn0037521	CG2993	PF01413	C4	C4	CG16858,CG4145	FBgn0016075,FBgn0000299	vkg,Col4a1	2	0.00643359	0.030744
CG18748	FBgn0042105	CG18748	PF00307	CH	Calponin homology (CH)	CG34417,CG4376,CG13366,CG18076	FBgn0085446,FBgn0000667,FBgn0025633,FBgn0013733	CG34417,Actn,CG13366,shot	4	0.00121949	0.00853641
CG4674	FBgn0037856	Leash	PF10607	CTLH	C-terminal to LisH motif domain	CG42236,CG31357,CG6617	FBgn0262114,FBgn0051357,FBgn0030944	RanBPM,CG31357,CG6617	3	0.0034081	0.0190854
CG18746	FBgn0042103	CG18746	PF00270	DEAD	DEAD	CG11107,CG5800,CG7483,CG9680,CG6375,CG14637,CG5931	FBgn0033160,FBgn0030855,FBgn0037573,FBgn0004556,FBgn0266581,FBgn0015331,FBgn0263599	Dhx15,CG5800,CG7483,Dbp73D,pit,abs,l(3)72Ab	7	2.21e-05	0.000281617
CG7047	FBgn0035103	Vdup1	PF00270	DEAD	DEAD	CG7483,CG5931,CG11107,CG2173,CG14637,CG11680	FBgn0037573,FBgn0263599,FBgn0033160,FBgn0021995,FBgn0015331,FBgn0002774	CG7483,l(3)72Ab,Dhx15,Rs1,abs,mle	6	2.97e-05	0.000346902
CG10086	FBgn0037517	CG10086	PF00270	DEAD	DEAD	CG8611,CG7483,CG11680,CG10777	FBgn0027602,FBgn0037573,FBgn0002774,FBgn0029979	CG8611,CG7483,mle,mahe	4	0.00658799	0.030744
CG18748	FBgn0042105	CG18748	PF13405	EF-hand_6	EF-hand	CG4376,CG3201,CG3595	FBgn0000667,FBgn0004687,FBgn0003514	Actn,Mlc-c,sqh	3	0.00102276	0.00795478
CG2993	FBgn0037521	CG2993	PF00632	HECT	HECT	CG42797,CG42279,CG4244,CG5604,CG8184	FBgn0261931,FBgn0259174,FBgn0003557,FBgn0032208,FBgn0030674	CG42797,Nedd4,Su(dx),Ufd4,CG8184	5	8.79e-08	4.1e-06
CG4674	FBgn0037856	Leash	PF00632	HECT	HECT	CG4943,CG11734,CG42279,CG42797,CG4244,CG8184	FBgn0029006,FBgn0031107,FBgn0259174,FBgn0261931,FBgn0003557,FBgn0030674	Smurf,HERC2,Nedd4,CG42797,Su(dx),CG8184	6	3.95e-06	7.91e-05
CG10086	FBgn0037517	CG10086	PF00632	HECT	HECT	CG42797,CG4943,CG42279	FBgn0261931,FBgn0029006,FBgn0259174	CG42797,Smurf,Nedd4	3	0.00498777	0.0258625
CG2641	FBgn0037518	CG2641	PF00632	HECT	HECT	CG42797,CG42279,CG4244	FBgn0261931,FBgn0259174,FBgn0003557	CG42797,Nedd4,Su(dx)	3	0.0014307	0.00953801
CG18746	FBgn0042103	CG18746	PF00271	Helicase_C	Helicase	CG11107,CG5800,CG7483,CG9680,CG3225,CG6375,CG14637,CG5931	FBgn0033160,FBgn0030855,FBgn0037573,FBgn0004556,FBgn0031631,FBgn0266581,FBgn0015331,FBgn0263599	Dhx15,CG5800,CG7483,Dbp73D,CG3225,pit,abs,l(3)72Ab	8	2.2e-05	0.000281617
CG7047	FBgn0035103	Vdup1	PF00271	Helicase_C	Helicase	CG7483,CG5931,CG11107,CG2173,CG14637,CG11680	FBgn0037573,FBgn0263599,FBgn0033160,FBgn0021995,FBgn0015331,FBgn0002774	CG7483,l(3)72Ab,Dhx15,Rs1,abs,mle	6	0.00019728	0.0019728
CG18745	FBgn0042102	CG18745	PF03810	IBN_N	Importin-beta N-termain (IBN-N)	CG7935,CG5252,CG32165,CG32164	FBgn0026252,FBgn0037894,FBgn0042178,FBgn0042177	msk,Ranbp9,CG32165,CG32164	4	1.61e-05	0.000250904
CG1105	FBgn0037465	CG1105	PF03810	IBN_N	Importin-beta N-termain (IBN-N)	CG32165,CG7398,CG7935,CG5252,CG13387,CG32164	FBgn0042178,FBgn0024921,FBgn0026252,FBgn0037894,FBgn0020497,FBgn0042177	CG32165,Tnpo,msk,Ranbp9,emb,CG32164	6	1.57e-08	2.11e-06
CG18748	FBgn0042105	CG18748	PF00612	IQ	IQ calmodulin-binding motif	CG7595,CG7438,CG15792,CG2146	FBgn0000317,FBgn0086347,FBgn0265434,FBgn0261397	ck,Myo31DF,zip,didum	4	0.000481827	0.00396799
CG18745	FBgn0042102	CG18745	PF02854	MIF4G	MIF4G	CG10192,CG9004,CG13124	FBgn0260634,FBgn0035336,FBgn0032156	eIF4G2,CG9004,CG13124	3	0.000401262	0.00365972
CG10086	FBgn0037517	CG10086	PF02854	MIF4G	MIF4G	CG10192,CG2253,CG9004,CG7035	FBgn0260634,FBgn0029992,FBgn0035336,FBgn0022942	eIF4G2,Upf2,CG9004,Cbp80	4	3.54e-05	0.000381227
CG18748	FBgn0042105	CG18748	PF00063	Myosin_head	Myosin_head	CG7595,CG5695,CG7438,CG9155,CG15792,CG2146	FBgn0000317,FBgn0011225,FBgn0086347,FBgn0010246,FBgn0265434,FBgn0261397	ck,jar,Myo31DF,Myo61F,zip,didum	6	3.02e-08	2.11e-06
CG4674	FBgn0037856	Leash	PF00069	Pkinase	Pkinase	CG2028,CG6551,CG11228,CG17520,CG2048,CG12306,CG7597,CG42320,CG4268,CG5179	FBgn0015024,FBgn0001079,FBgn0261456,FBgn0264492,FBgn0002413,FBgn0003124,FBgn0037093,FBgn0265998,FBgn0016696,FBgn0019949	CkIalpha,fu,hpo,CkIIalpha,dco,polo,Cdk12,Doa,Pitslre,Cdk9	10	0.00451971	0.0243369
CG18746	FBgn0042103	CG18746	PF00160	Pro_isomerase	Pro_isomerase	CG5808,CG13892,CG1866,CG4886	FBgn0027617,FBgn0035141,FBgn0039581,FBgn0028382	CG5808,Cypl,Moca-cyp,cyp33	4	0.00108358	0.00798429
CG4674	FBgn0037856	Leash	PF00227	Proteasome	Proteasome	CG8392,CG1519,CG17331,CG12323,CG11981,CG3329,CG4097,CG5266	FBgn0010590,FBgn0023175,FBgn0032596,FBgn0029134,FBgn0026380,FBgn0023174,FBgn0002284,FBgn0086134	Prosbeta1,Prosalpha7,Prosbeta4,Prosbeta5,Prosbeta3,Prosbeta2,Prosbeta6,Prosalpha2	8	3.7e-07	1.3e-05
CG18748	FBgn0042105	CG18748	PF14604	SH3_9	Src Homology-3 (SH3)	CG1099,CG3637,CG31012,CG10083	FBgn0023388,FBgn0025865,FBgn0027598,FBgn0036372	Dap160,Cortactin,cindr,Abp1	4	0.000418254	0.00365972
CG4674	FBgn0037856	Leash	PF00400	WD40	WD40	CG7392,CG6015,CG1523,CG3436,CG1796,CG5451,CG6322,CG5519,CG7611	FBgn0044323,FBgn0038927,FBgn0039601,FBgn0031229,FBgn0030365,FBgn0038666,FBgn0036733,FBgn0261119,FBgn0037094	Cka,CG6015,CG1523,CG3436,Tango4,Smu1,U4-U6-60K,Prp19,CG7611	9	0.00317246	0.018506
CG2993	FBgn0037521	CG2993	PF00397	WW	WW	CG42797,CG42279,CG4244	FBgn0261931,FBgn0259174,FBgn0003557	CG42797,Nedd4,Su(dx)	3	0.00166478	0.0105941
CG4674	FBgn0037856	Leash	PF00397	WW	WW	CG4943,CG42279,CG42797,CG4244,CG4005,CG33967,CG33193	FBgn0029006,FBgn0259174,FBgn0261931,FBgn0003557,FBgn0034970,FBgn0262127,FBgn0053193	Smurf,Nedd4,CG42797,Su(dx),yki,kibra,sav	7	9.22e-07	2.58e-05
CG10086	FBgn0037517	CG10086	PF00397	WW	WW	CG42797,CG4943,CG42279	FBgn0261931,FBgn0029006,FBgn0259174	CG42797,Smurf,Nedd4	3	0.00914284	0.0412902
CG2641	FBgn0037518	CG2641	PF00397	WW	WW	CG42797,CG42279,CG4244	FBgn0261931,FBgn0259174,FBgn0003557	CG42797,Nedd4,Su(dx)	3	0.00265394	0.0161544
