# Supplementary material for: Comparative interactome analysis of α-arrestin families in human and Drosophila
Source: eLife. 2024 Jan 25;12:RP88328. doi: 10.7554/eLife.88328 (PMC10945707; doi:10.7554/eLife.88328)
Supplement: Supplementary file 6. — Summary tables of subcellular localizations of α-arrestins interactomes for human (A) and Drosophila (B). [file elife-88328-supp6.xlsx]

## Sheet: A. Human prey localization
Symbol	Subcellular localizations
BAG2	Cytosol
SMC2	Cytosol,Nucleus
SVIL	Cytosol,Nucleus,Plasma membrane
PSMD8	Cytosol,Nucleus
ITCH	Cytosol,Plasma membrane
ANKRD13A	Plasma membrane
PSMD4	Cytosol,Nucleus
MYO1D	Endosome,Cytosol
CPD	Extracellular space,Plasma membrane
MYO1B	Plasma membrane
PRKDC	Cytosol,Nucleus
BMPR1A	Plasma membrane
FANCD2	Cytosol,Nucleus
BAG6	Cytosol,Nucleus
MMS19	Cytosol,Nucleus
CAD	Cytosol,Nucleus
SUGT1	Cytosol,Nucleus
PI4KA	Cytosol,Plasma membrane
HUWE1	Cytosol,Nucleus
NEDD4L	Golgi apparatus,Cytosol,Plasma membrane
UBE3C	Nucleus
WWP1	Cytosol,Nucleus,Plasma membrane
SMC4	Cytosol,Nucleus
LTN1	Cytosol
PSMA3	Cytosol,Nucleus
NDFIP1	Golgi apparatus
TFRC	Extracellular space,Endosome,Plasma membrane
NF1	Cytosol,Nucleus
JAK1	Endosome,Cytosol,Nucleus,Cytoskeleton
DSG2	Plasma membrane
PJA2	Plasma membrane
PSMC5	Cytosol,Nucleus
FANCI	Cytosol
ABCB1	Plasma membrane
KIF16B	Endosome,Cytosol
MAP1B	Cytosol,Plasma membrane
ATM	Nucleus
XPOT	Cytosol
MTR	Cytosol
PSMD1	Cytosol,Nucleus
SLC12A2	Plasma membrane
EPHA2	Plasma membrane
GCN1	Cytosol
RNF31	Cytosol
POLR2A	Nucleus
PPP6R3	Cytosol,Plasma membrane
PEX1	Cytosol,Peroxisome
PSMD2	Cytosol,Nucleus
GET4	Cytosol
WWP2	Cytosol,Nucleus
CAND2	Cytosol,Nucleus
RAB9A	Lysosome,Cytosol,Plasma membrane
SLC20A1	Plasma membrane
PTPRS	Plasma membrane
GNAS	Cytosol
UBL4A	Cytosol,Nucleus
MAGED2	Cytosol,Nucleus
MYO6	Golgi apparatus,Cytosol,Nucleus,Plasma membrane
PSMD13	Cytosol,Nucleus
PELO	Nucleus
PTPRF	Plasma membrane
HERC2	Nucleus
ABCA3	Extracellular space,Plasma membrane
RBCK1	Cytosol
IPO9	Cytosol
MON2	Cytosol
PSMB5	Cytosol,Nucleus
PSMB3	Cytosol,Nucleus
PSMB2	Cytosol,Nucleus
RHOBTB3	Cytosol,Plasma membrane
ATP6V1F	Cytosol
ATP6V1A	Cytosol,Plasma membrane
ATP6V1H	Cytosol,Plasma membrane
STOM	Extracellular space,Endoplasmic reticulum,Mitochondrion,Cytoskeleton,Plasma membrane
ATP11C	Endoplasmic reticulum,Plasma membrane
ATP11B	Endoplasmic reticulum,Plasma membrane
MYADM	Plasma membrane
BTBD10	Nucleus
ATP6V1B2	Cytosol,Plasma membrane
ERLIN1	Endoplasmic reticulum
STUB1	Cytosol,Endoplasmic reticulum,Nucleus
ABCD3	Cytosol,Peroxisome,Mitochondrion
ATP6V0A1	Golgi apparatus,Cytosol,Plasma membrane
PLPP1	Plasma membrane
ATP6V0C	Plasma membrane
ATP6V0A2	Plasma membrane
KIDINS220	Cytosol
HMGA1	Cytosol,Nucleus
USP11	Cytosol,Nucleus
CACNA2D1	Plasma membrane
LMTK2	Golgi apparatus,Cytosol
ABCG2	Nucleus,Plasma membrane
ATP1A1	Endosome,Golgi apparatus,Endoplasmic reticulum,Plasma membrane
ERLIN2	Cytosol,Endoplasmic reticulum,Plasma membrane
ENDOD1	Cytosol
ATP6V1E1	Endosome,Cytosol
STOML2	Cytoskeleton
SLC2A1	Cytosol,Plasma membrane
FLOT1	Endosome,Plasma membrane
FLOT2	Endosome,Plasma membrane
ATP6V1C1	Cytosol,Plasma membrane
TSG101	Endosome,Cytosol,Plasma membrane
FGFRL1	Golgi apparatus,Plasma membrane
SLC2A11	Nucleus,Plasma membrane
SMURF1	Cytosol,Mitochondrion,Plasma membrane
HADHB	Endoplasmic reticulum,Mitochondrion
HADHA	Mitochondrion
NEDD4	Golgi apparatus,Cytosol,Plasma membrane
CUL9	Cytosol
ZMYM2	Cytosol,Nucleus
LAMA1	Extracellular space
KLHL12	Cytosol
LAMA5	Extracellular space,Nucleus
LAMC1	Extracellular space
NRP1	Extracellular space,Cytosol,Plasma membrane
TP53	Cytosol,Endoplasmic reticulum,Nucleus,Mitochondrion
UTRN	Cytoskeleton,Plasma membrane
MYO5A	Golgi apparatus,Lysosome,Cytosol,Endoplasmic reticulum,Peroxisome
HDAC2	Nucleus
SF3B1	Nucleus
EPB41L3	Cytosol,Cytoskeleton,Plasma membrane
PSMD3	Cytosol,Nucleus
SETD1A	Nucleus
PRPF8	Nucleus
USP9X	Cytosol
GEMIN4	Cytosol
TSC2	Golgi apparatus,Lysosome,Cytosol,Nucleus
CPSF1	Nucleus
KCMF1	Cytosol
HCFC1	Nucleus
TUBA1C	Nucleus
ASH2L	Nucleus
RANBP9	Cytosol,Nucleus,Plasma membrane
WDR6	Cytosol,Plasma membrane
FARP2	Cytosol,Cytoskeleton
SNRNP200	Nucleus
PRKAR1A	Cytosol
SART3	Nucleus
TUBGCP2	Cytosol
UBR4	Cytosol,Plasma membrane
DDX20	Cytosol,Nucleus,Cytoskeleton
SMU1	Nucleus
LLGL1	Cytoskeleton,Plasma membrane
IRS4	Cytosol,Plasma membrane
SRRM2	Nucleus
FLNC	Cytosol,Cytoskeleton,Plasma membrane
FBL	Nucleus
NCBP1	Cytosol,Nucleus,Mitochondrion
EPB41L4B	Cytosol,Cytoskeleton,Plasma membrane
MFAP1	Nucleus
DHX15	Nucleus
CCNT1	Nucleus
CWC27	Nucleus
PBXIP1	Cytosol,Nucleus
RBM15B	Nucleus
SGPL1	Endoplasmic reticulum
FMNL2	Cytosol
FMNL3	Golgi apparatus,Cytosol,Plasma membrane
ARHGEF2	Golgi apparatus,Cytosol,Cytoskeleton
BCLAF1	Nucleus
ZC3H14	Nucleus
SAP18	Cytosol
DYRK1A	Nucleus,Cytoskeleton
CUL7	Golgi apparatus,Cytosol
DDX3X	Cytosol,Nucleus
DNAJC10	Endoplasmic reticulum
C2CD5	Cytosol,Plasma membrane
CAMK2D	Cytosol,Nucleus
TRIM25	Cytosol
TRIM26	Cytosol,Nucleus
CAMK2G	Cytosol
DEPDC1B	Cytosol
CSNK2A2	Cytosol,Nucleus,Plasma membrane
CSNK2A1	Cytosol,Nucleus,Plasma membrane
GPATCH1	Nucleus
PDXDC1	Golgi apparatus,Endoplasmic reticulum
PTPN13	Nucleus,Cytoskeleton,Plasma membrane
RBBP6	Cytosol
SPEN	Nucleus
DDX5	Nucleus
COPB2	Cytosol
CEP78	Cytosol
DMD	Cytosol,Cytoskeleton
PAXBP1	Cytosol,Nucleus
SLC25A17	Peroxisome
DHX30	Cytosol,Nucleus,Mitochondrion
SRSF7	Nucleus
SRSF1	Nucleus
RUVBL2	Cytosol,Nucleus
DDX50	Plasma membrane
U2AF2	Nucleus
ZIC2	Nucleus
HTRA2	Cytosol,Endoplasmic reticulum,Nucleus,Mitochondrion,Cytoskeleton
SF3A3	Nucleus
PDLIM5	Cytosol
RNPS1	Cytosol,Nucleus
MLLT11	Cytosol
POLR2B	Nucleus
SART1	Golgi apparatus,Cytosol,Nucleus
MCCC2	Cytosol,Mitochondrion
ABR	Cytosol,Plasma membrane
WDR34	Cytosol
TTC37	Cytosol,Nucleus
WDR33	Nucleus
TRIM3	Golgi apparatus
TRIM5	Cytosol,Nucleus
TRIM4	Cytosol,Plasma membrane
EIF4A3	Cytosol,Nucleus
SMAD5	Cytosol,Nucleus
MYO1E	Cytoskeleton
SDCBP	Extracellular space,Cytosol,Nucleus,Cytoskeleton,Plasma membrane
MCM5	Cytosol,Nucleus
TNIK	Cytosol,Nucleus,Cytoskeleton
CTNND1	Cytosol,Nucleus,Plasma membrane
MIOS	Cytosol,Nucleus
CFAP20	Nucleus
BCR	Cytosol
POLDIP2	Nucleus,Mitochondrion
PRPF40A	Cytosol
POLD1	Cytosol,Nucleus
RBM15	Nucleus
THRAP3	Nucleus
U2SURP	Nucleus
PARD3	Cytosol,Cytoskeleton,Plasma membrane
NUDT19	Cytosol
RAB11FIP5	Golgi apparatus
WDR11	Cytosol,Nucleus
CDK5	Cytosol,Nucleus,Plasma membrane
CDK9	Nucleus
AMOT	Cytosol,Nucleus
CLPX	Cytosol,Mitochondrion
NUMA1	Cytosol,Nucleus
BIRC2	Cytosol,Nucleus
SF3B3	Nucleus
SF3B2	Nucleus
IQGAP2	Cytosol,Plasma membrane
DDX17	Cytosol,Nucleus
LPIN1	Cytosol,Nucleus
ZCCHC8	Nucleus
SLIT2	Extracellular space,Plasma membrane
NFKBIL1	Cytosol,Nucleus
COPA	Extracellular space,Cytosol
COPE	Golgi apparatus,Cytosol
IARS2	Cytosol,Mitochondrion
MCM7	Cytosol,Nucleus
IK	Nucleus
MCM3	Nucleus
RUVBL1	Cytosol,Nucleus
SNW1	Nucleus
DDX28	Cytosol,Nucleus,Mitochondrion
VPS11	Endosome,Lysosome
SCRIB	Plasma membrane
PNN	Plasma membrane
SERPINH1	Extracellular space,Endoplasmic reticulum
NPHP3	Cytosol
GTF3C1	Nucleus
CHAF1B	Cytosol,Nucleus
ECD	Cytosol,Nucleus
PMPCB	Mitochondrion
PMPCA	Extracellular space,Mitochondrion
RLIM	Cytosol,Nucleus
PKN3	Golgi apparatus,Nucleus
GTF3C3	Nucleus
HSPA1B	Cytosol,Endoplasmic reticulum,Nucleus,Mitochondrion
USP5	Lysosome,Cytosol
RBBP7	Cytosol,Nucleus
HSPA1A	Cytosol,Endoplasmic reticulum,Nucleus,Mitochondrion
KDM5C	Cytosol,Nucleus

## Sheet: B. Fly prey localization
Symbol	Flybase Id	Annotation Id	Subcellular localizations
shg	FBgn0003391	CG3722	Plasma membrane
CG6701	FBgn0033889	CG6701	Cytosol
Taf5	FBgn0010356	CG7704	Nucleus
Dhap-at	FBgn0040212	CG4625	Peroxisome
CG6843	FBgn0036827	CG6843	Nucleus
CG6841	FBgn0036828	CG6841	Nucleus
YME1L	FBgn0034792	CG3499	Mitochondrion
Rat1	FBgn0031868	CG10354	Nucleus
dgt1	FBgn0039710	CG18041	Nucleus
Rcd5	FBgn0263832	CG1135	Nucleus
Tango5	FBgn0052675	CG32675	Endoplasmic reticulum
Es2	FBgn0023506	CG1474	Nucleus
CG5808	FBgn0027617	CG5808	Nucleus
SRm160	FBgn0036340	CG11274	Nucleus
Pex14	FBgn0037020	CG4289	Peroxisome
CG7483	FBgn0037573	CG7483	Nucleus
Top1	FBgn0004924	CG6146	Cytosol,Nucleus
hang	FBgn0026575	CG32575	Nucleus
tho2	FBgn0031390	CG31671	Nucleus
CG31368	FBgn0051368	CG31368	Nucleus
Tdrd3	FBgn0036450	CG13472	Nucleus
CG3589	FBgn0035065	CG3589	Peroxisome
CG2691	FBgn0030504	CG2691	Nucleus
snama	FBgn0086129	CG3231	Nucleus
larp	FBgn0261618	CG42551	Cytosol,Mitochondrion
CG15784	FBgn0029766	CG15784	Nucleus
Nab2	FBgn0028471	CG5720	Nucleus
CG5728	FBgn0039182	CG5728	Nucleus
CG7028	FBgn0027587	CG7028	Nucleus
AOX3	FBgn0038349	CG6045	Cytosol
c12.1	FBgn0040235	CG12135	Nucleus
Sf3a1	FBgn0266917	CG16941	Nucleus
CG5009	FBgn0027572	CG5009	Peroxisome
ND-49	FBgn0039909	CG1970	Mitochondrion
Cypl	FBgn0035141	CG13892	Nucleus
Hpr1	FBgn0037382	CG2031	Nucleus
CG6693	FBgn0037878	CG6693	Nucleus
CG9300	FBgn0036886	CG9300	Nucleus
bor	FBgn0040237	CG6815	Mitochondrion
crn	FBgn0000377	CG3193	Nucleus
fand	FBgn0033859	CG6197	Nucleus
CG8833	FBgn0036386	CG8833	Nucleus
Rcd1	FBgn0033897	CG8233	Nucleus
CG14641	FBgn0037220	CG14641	Nucleus
Moca-cyp	FBgn0039581	CG1866	Nucleus
Cdk12	FBgn0037093	CG7597	Nucleus
CG4849	FBgn0039566	CG4849	Cytosol
Pitslre	FBgn0016696	CG4268	Nucleus
nsl1	FBgn0262527	CG4699	Nucleus
Nnp-1	FBgn0022069	CG12396	Nucleus
Sec63	FBgn0035771	CG8583	Endoplasmic reticulum
mof	FBgn0014340	CG3025	Nucleus
Acn	FBgn0263198	CG10473	Nucleus
MBD-R2	FBgn0038016	CG10042	Nucleus
l(3)72Ab	FBgn0263599	CG5931	Nucleus
Zn72D	FBgn0263603	CG5215	Nucleus
msk	FBgn0026252	CG7935	Cytosol,Nucleus
Ranbp9	FBgn0037894	CG5252	Cytosol
spoon	FBgn0263987	CG3249	Golgi apparatus,Mitochondrion
poe	FBgn0011230	CG14472	Cytosol
chb	FBgn0021760	CG32435	Nucleus
Cand1	FBgn0027568	CG5366	Nucleus
YT521-B	FBgn0027616	CG12076	Nucleus
MCU	FBgn0042185	CG18769	Mitochondrion
Larp7	FBgn0260771	CG42569	Nucleus
CG13124	FBgn0032156	CG13124	Cytosol
Mys45A	FBgn0033379	CG8070	Nucleus
caz	FBgn0285954	CG3606	Nucleus
Mpcp2	FBgn0026409	CG4994	Mitochondrion
ZnT63C	FBgn0035432	CG17723	Plasma membrane
Tnpo	FBgn0024921	CG7398	Cytosol
Tor	FBgn0021796	CG5092	Nucleus
Sec3	FBgn0266669	CG3885	Plasma membrane
Nipped-A	FBgn0053554	CG33554	Nucleus
Stat92E	FBgn0016917	CG4257	Cytosol,Nucleus
c11.1	FBgn0040236	CG12132	Golgi apparatus
Ccs	FBgn0010531	CG17753	Peroxisome
emb	FBgn0020497	CG13387	Nucleus
Vav	FBgn0040068	CG7893	Cytosol
pix	FBgn0086706	CG5651	Cytosol
eIF2alpha	FBgn0261609	CG9946	Cytosol
Sec5	FBgn0266670	CG8843	Plasma membrane
CG15099	FBgn0034400	CG15099	Endosome
Karybeta3	FBgn0087013	CG1059	Cytosol
Sec8	FBgn0266672	CG2095	Plasma membrane
Cul3	FBgn0261268	CG42616	Cytosol
Mitofilin	FBgn0019960	CG6455	Mitochondrion
Art8	FBgn0032329	CG16840	Cytosol,Nucleus
pds5	FBgn0260012	CG17509	Nucleus
Nmd3	FBgn0023542	CG3460	Nucleus
CG4004	FBgn0030418	CG4004	Nucleus
CG10376	FBgn0032702	CG10376	Nucleus
mon2	FBgn0031985	CG8683	Endosome,Golgi apparatus
Psi	FBgn0014870	CG8912	Nucleus
Tep4	FBgn0041180	CG10363	Extracellular space
AOX1	FBgn0267408	CG18522	Cytosol
atl	FBgn0039213	CG6668	Golgi apparatus,Endoplasmic reticulum
CG31729	FBgn0051729	CG31729	Endosome,Plasma membrane
SH3PX1	FBgn0040475	CG6757	Plasma membrane
Mul1	FBgn0035483	CG1134	Peroxisome
Pgam5	FBgn0023517	CG14816	Mitochondrion
CkIalpha	FBgn0015024	CG2028	Nucleus
vkg	FBgn0016075	CG16858	Extracellular space
CG8001	FBgn0035268	CG8001	Nucleus
pcx	FBgn0003048	CG3443	Endoplasmic reticulum
CG7546	FBgn0035793	CG7546	Cytosol
Col4a1	FBgn0000299	CG4145	Extracellular space
CG3164	FBgn0025683	CG3164	Plasma membrane
Nedd4	FBgn0259174	CG42279	Plasma membrane
Gs1	FBgn0001142	CG2718	Mitochondrion
Ufd4	FBgn0032208	CG5604	Nucleus
sax	FBgn0003317	CG1891	Plasma membrane
CG8184	FBgn0030674	CG8184	Nucleus
Snx16	FBgn0034265	CG6410	Plasma membrane
ncd	FBgn0002924	CG7831	Nucleus
AP-2alpha	FBgn0264855	CG4260	Plasma membrane
pasha	FBgn0039861	CG1800	Nucleus
Vps4	FBgn0283469	CG6842	Endosome,Nucleus
Ubqn	FBgn0031057	CG14224	Cytosol
AGO2	FBgn0087035	CG7439	Cytosol,Nucleus
Fmr1	FBgn0028734	CG6203	Nucleus
row	FBgn0033998	CG8092	Nucleus
tral	FBgn0041775	CG10686	Cytosol,Endoplasmic reticulum
Ulp1	FBgn0027603	CG12359	Nucleus
dnc	FBgn0000479	CG32498	Cytosol,Nucleus
gro	FBgn0001139	CG8384	Nucleus
mle	FBgn0002774	CG11680	Cytosol,Nucleus
Cbp80	FBgn0022942	CG7035	Nucleus
Syp	FBgn0038826	CG17838	Cytosol,Nucleus
CG10341	FBgn0032701	CG10341	Nucleus
dsh	FBgn0000499	CG18361	Cytosol,Plasma membrane
woc	FBgn0010328	CG5965	Nucleus
ZAP3	FBgn0052685	CG32685	Nucleus
Topors	FBgn0267351	CG15104	Nucleus
Prosbeta1	FBgn0010590	CG8392	Nucleus
Su(Tpl)	FBgn0014037	CG32217	Nucleus
Smurf	FBgn0029006	CG4943	Cytosol
fs(1)h	FBgn0004656	CG2252	Nucleus
Prosalpha7	FBgn0023175	CG1519	Nucleus
qkr58E-1	FBgn0022986	CG3613	Nucleus
RanBPM	FBgn0262114	CG42236	Nucleus
CG1603	FBgn0033185	CG1603	Nucleus
vir	FBgn0003977	CG3496	Nucleus
fl(2)d	FBgn0000662	CG6315	Nucleus
CG9577	FBgn0031092	CG9577	Peroxisome,Mitochondrion
Saf-B	FBgn0039229	CG6995	Nucleus
Cka	FBgn0044323	CG7392	Nucleus
Pfrx	FBgn0027621	CG3400	Cytosol
Mnt	FBgn0023215	CG13316	Nucleus
Pi3K68D	FBgn0015278	CG11621	Plasma membrane
mago	FBgn0002736	CG9401	Nucleus
bin3	FBgn0263144	CG8276	Nucleus
HERC2	FBgn0031107	CG11734	Nucleus
Uch-L5	FBgn0011327	CG3431	Nucleus
Egm	FBgn0086712	CG9006	Extracellular space,Mitochondrion
cos	FBgn0000352	CG1708	Plasma membrane
Prosbeta4	FBgn0032596	CG17331	Nucleus
Tango4	FBgn0030365	CG1796	Cytosol
Sas-4	FBgn0011020	CG10061	Nucleus
Smu1	FBgn0038666	CG5451	Nucleus
ttm50	FBgn0250874	CG2713	Mitochondrion
wash	FBgn0033692	CG13176	Endosome,Nucleus
shot	FBgn0013733	CG18076	Cytoskeleton
AP-1-2beta	FBgn0010380	CG12532	Plasma membrane
Prosbeta5	FBgn0029134	CG12323	Cytosol,Nucleus
CG6512	FBgn0036702	CG6512	Mitochondrion
TrpRS-m	FBgn0036763	CG7441	Mitochondrion
IRSp53	FBgn0052082	CG32082	Cytosol
Chro	FBgn0044324	CG10712	Nucleus
CycT	FBgn0025455	CG6292	Nucleus
CG31357	FBgn0051357	CG31357	Nucleus
brat	FBgn0010300	CG10719	Cytosol
sktl	FBgn0016984	CG9985	Plasma membrane
Rpt4	FBgn0028685	CG3455	Nucleus
hpo	FBgn0261456	CG11228	Cytosol
CkIIalpha	FBgn0264492	CG17520	Cytosol,Nucleus
SWIP	FBgn0030739	CG13957	Endosome
Rpn10	FBgn0015283	CG7619	Cytosol,Nucleus
PH4alphaEFB	FBgn0039776	CG31022	Endoplasmic reticulum
yki	FBgn0034970	CG4005	Lysosome,Cytosol,Nucleus
Hexim	FBgn0038251	CG3508	Nucleus
Prosbeta3	FBgn0026380	CG11981	Nucleus
ND-42	FBgn0019957	CG6343	Mitochondrion
Rpt6	FBgn0020369	CG1489	Nucleus
Prosbeta2	FBgn0023174	CG3329	Nucleus
dco	FBgn0002413	CG2048	Nucleus,Plasma membrane
beag	FBgn0037660	CG18005	Nucleus
polo	FBgn0003124	CG12306	Nucleus
Prosbeta6	FBgn0002284	CG4097	Nucleus
drosha	FBgn0026722	CG8730	Nucleus
CG7358	FBgn0030974	CG7358	Nucleus
HnRNP-K	FBgn0267791	CG13425	Nucleus
Prosalpha2	FBgn0086134	CG5266	Nucleus
Doa	FBgn0265998	CG42320	Endoplasmic reticulum,Nucleus
Mer	FBgn0086384	CG14228	Cytoskeleton,Plasma membrane
CG2658	FBgn0024992	CG2658	Mitochondrion
enok	FBgn0034975	CG11290	Nucleus
pea	FBgn0086895	CG8241	Nucleus
lilli	FBgn0041111	CG8817	Nucleus
sav	FBgn0053193	CG33193	Cytosol
Cdk9	FBgn0019949	CG5179	Nucleus
Rpn2	FBgn0028692	CG11888	Nucleus
mrn	FBgn0261109	CG7764	Nucleus
Mtpalpha	FBgn0028479	CG4389	Peroxisome,Mitochondrion
CG2247	FBgn0030320	CG2247	Nucleus
Gel	FBgn0010225	CG1106	Cytosol
RpII33	FBgn0026373	CG7885	Nucleus
tum	FBgn0086356	CG13345	Nucleus
spd-2	FBgn0027500	CG17286	Mitochondrion
Ced-12	FBgn0032409	CG5336	Nucleus
Nap1	FBgn0015268	CG5330	Nucleus,Mitochondrion,Plasma membrane
Pp1-87B	FBgn0004103	CG5650	Nucleus
scra	FBgn0261385	CG2092	Nucleus
sqh	FBgn0003514	CG3595	Plasma membrane
Cortactin	FBgn0025865	CG3637	Plasma membrane
zip	FBgn0265434	CG15792	Cytosol,Cytoskeleton
l(2)gl	FBgn0002121	CG2671	Cytosol,Cytoskeleton,Plasma membrane
Act57B	FBgn0000044	CG10067	Plasma membrane
Tm1	FBgn0003721	CG4898	Cytosol
Hsp68	FBgn0001230	CG5436	Cytosol,Mitochondrion
CLIP-190	FBgn0020503	CG5020	Golgi apparatus
Cam	FBgn0000253	CG8472	Cytosol,Plasma membrane
Abp1	FBgn0036372	CG10083	Cytoskeleton
Pp1alpha-96A	FBgn0003134	CG6593	Nucleus
Dcr-2	FBgn0034246	CG6493	Nucleus
twf	FBgn0038206	CG3172	Plasma membrane
MetRS	FBgn0034401	CG15100	Cytosol
Golgin84	FBgn0039188	CG17785	Golgi apparatus
Capr	FBgn0042134	CG18811	Cytosol
sws	FBgn0003656	CG2212	Endoplasmic reticulum,Plasma membrane
CG8478	FBgn0037746	CG8478	Nucleus
Tsf3	FBgn0034094	CG3666	Extracellular space
Hrb87F	FBgn0004237	CG12749	Nucleus
CG2982	FBgn0266570	CG2982	Nucleus
Apc	FBgn0015589	CG1451	Cytosol
bon	FBgn0023097	CG5206	Nucleus
e(y)1	FBgn0000617	CG6474	Nucleus
vig	FBgn0024183	CG4170	Cytosol,Nucleus
east	FBgn0261954	CG4399	Nucleus
bip2	FBgn0026262	CG2009	Nucleus
Nrd1	FBgn0030344	CG2025	Mitochondrion
Zw10	FBgn0004643	CG9900	Endoplasmic reticulum,Nucleus
Sap-r	FBgn0000416	CG12070	Lysosome
dom	FBgn0020306	CG9696	Nucleus
puf	FBgn0039214	CG5794	Nucleus
