# Supplementary material for: Comparative interactome analysis of α-arrestin families in human and Drosophila
Source: eLife. 2024 Jan 25;12:RP88328. doi: 10.7554/eLife.88328 (PMC10945707; doi:10.7554/eLife.88328)
Supplement: Supplementary file 7. — Results of the protein complex enrichment analysis tool (COMPLEAT) and enrichment test of cellular component GO terms for human (A, B) and Drosophila (C, D). [file elife-88328-supp7.xlsx]

## Sheet: A. Human COMPLEAT Summary
Baits (HGNC ID)	Complex ID	Size	Score	p-value	Type	Name	Genes (HGNC ID)
ARRDC4	HC255	22	0.473	0.02992	Literature	26S proteasome	PSMB1,PSMA3,PSMB5,PSMB4,PSMA2,PSMC3,PSMB7,PSMA1,PSMD4,PSMA4,PSMB3,PSMC4,PSMA6,PSMD13,PSMC6,PSMA7,PSMC2,PSMB2,PSMC5,PSMC1,PSMA5,PSMB6
ARRDC4	HC1372	18	0.568	0.005802	Literature	Proteasome, 19S regulatory particle (PA700)	PSMC3,PSMD7,PSMD4,PSMC4,PSMD2,PSMD1,PSMD13,PSMC6,PSMD3,PSMD8,SEM1,PSMC2,PSMD14,PSMD11,PSMD6,PSMC5,PSMC1,PSMD12
ARRDC4	HC2149	11	0.576	0.01261	Literature	protein ubiquitination involved in ubiquitin-dependent protein catabolic process	ITCH,USP28,NEDD4L,WWP1,USP25,SMURF2,SMURF1,NEDD4,USP5,WWP2,USP13
ARRDC4	HC5667	12	0.583	0.01818	Predicted	ubiquitin-dependent protein catabolic process	PTEN,ITCH,UBE2L3,ARRDC1,NEDD4L,SLC11A2,NDFIP2,NDFIP1,NEDD4,POLR2A,UBC,WWP2
ARRDC4	HC8814	8	0.617	0.03675	Predicted	positive regulation of protein ubiquitination	AMPD2,SLC11A2,NEDD4L,NDFIP2,NDFIP1,UBC,NEDD4,CSNK1G3
ARRDC4	HC5720	8	0.622	0.03464	Predicted	protein polyubiquitination	HDGFL3,NEDD4L,SLC11A2,NDFIP2,NDFIP1,SMURF1,NEDD4,UBC
ARRDC4	HC4429	8	0.625	0.03362	Predicted	cellular metal ion homeostasis	NEDD4L,SLC11A2,NDFIP2,NDFIP1,TFRC,NEDD4,UBC,ACAP1
ARRDC4	HC5903	8	0.625	0.03362	Predicted	positive regulation of protein metabolic process	GRK4,NEDD4L,SLC11A2,NDFIP2,SLC12A2,NDFIP1,NEDD4,UBC
ARRDC4	HC1	5	0.66	0.03164	Literature	13S condensin complex	NCAPD2,SMC2,NCAPG,NCAPH,SMC4
ARRDC4	HC6908	8	0.75	0.006187	Predicted	cellular metal ion homeostasis	TYRO3,SLC11A2,NEDD4L,NDFIP2,NDFIP1,UBC,NEDD4,TFRC
ARRDC4	HC647	3	0.91	0.04071	Literature	mitotic cell cycle spindle assembly checkpoint	MAD2L1,TTK,MAD1L1
ARRDC4	HC1119	3	0.98	0.0265	Literature	Dop1p/Mon2p complex	DOPEY1,DOPEY2,MON2
ARRDC4	HC1318	3	0.98	0.0265	Literature	LIFR-LIF-gp130 complex	LIF,IL6ST,LIFR
ARRDC4	HC345	3	0.98	0.0265	Literature	oncostatin-M receptor complex	OSMR,IL6ST,OSM
ARRDC4	HC948	3	0.98	0.0265	Literature	GAL4p/GAL80p complex	NOTCH1,NOTCH2,TSC2
ARRDC4	HC2631	3	0.99	0.02486	Literature	TGF-beta receptor I-SMAD7-SMURF1 complex	TGFBR1,SMURF1,SMAD7
ARRDC4	HC1737	5	0.993	0.0002746	Literature	Condensin II	SMC2,NCAPD3,NCAPH2,NCAPG2,SMC4
ARRDC4	HC1452	3	1	0.0233	Literature	LUBAC complex	RBCK1,RNF31,SHARPIN
ARRDC4	HC1774	3	1	0.0233	Literature	DNA ligase IV-condensin complex	LIG4,SMC2,SMC4
ARRDC4	HC277	3	1	0.0233	Literature	BAT3 complex	UBL4A,BAG6,GET4
ARRDC5	HC9362	6	0.49	0.02942	Predicted	protein transport	SNF8,ELL,CHMP4B,VPS36,VPS25,CHMP6
ARRDC5	HC5066	6	0.5	0.02548	Predicted	transferrin transport	SCARB2,ATP6V1D,AZU1,DDOST,ATP6V1B2,ATP6V1A
ARRDC5	HC6046	4	0.585	0.03925	Predicted	transferrin transport	SCARB2,ATP6V1B2,ATP6V1A,UBC
ARRDC5	HC758	21	0.769	1.01e-09	Literature	"""H+-transporting ATPase, vacuolar""	ATP6V1A,ATP6V1C2,ATP6V1E2,ATP6V0A1,ATP6V1B2,ATP6V1B1,ATP6V0B,ATP6V1D,TCIRG1,ATP6V1F,ATP6V1G2,ATP6V1G3,ATP6V0A4,ATP6V0A2,ATP6V0D2,ATP6V0C,ATP6V1H,ATP6V1C1,ATP6V1E1,ATP6V0D1,ATP6V1G1
ARRDC5	HC8088	7	0.832	7.427e-06	Predicted	transferrin transport	ATP6V0A1,VMA21,KIAA2013,ATP6V0D1,CTRL,TMEM199,ATP6AP2
ARRDC5	HC5643	6	0.995	2.301e-07	Predicted	transferrin transport	SCARB2,ATP6V1D,ATP6V1H,ATP6V1B2,ATP6V1A,STOM
ARRDC5	HC4306	14	0.998	4.983e-12	Predicted	transferrin transport	ATP6V1D,DMXL1,TCIRG1,ATP6V1A,ATP6V1F,ABCF2,ATP6V0A1,ATP6V1H,ATP6V1B2,ATP6V1C1,ATP6V1E1,ATP6V0D1,UBC,ATP6V1G1
ARRDC5	HC6837	13	1	2.676e-11	Predicted	transferrin transport	ATP6V1D,TCIRG1,ATP6V1A,ATP6V1F,ATP11C,ATP11A,ATP6V1C1,ATP6V1B2,ATP6V1H,ATP6V1E1,ATP6V0D1,UBC,ATP6V1G1
ARRDC5	HC7822	7	1	2.296e-08	Predicted	transferrin transport	ATP6V0A1,SCARB2,ATP6V1D,ATP6V1B2,ATP6V1A,KIAA2013,ATP6V0D1
ARRDC1	HC4146	7	0.4	0.01662	Predicted	axon guidance	COL4A5,LAMC1,LAPTM4A,ACHE,LAMA5,SPRY2,LAMB1
ARRDC1	HC4951	7	0.4	0.01662	Predicted	proteasomal ubiquitin-dependent protein catabolic process	YWHAQ,ARRDC1,WWP1,TP53BP2,CLCN5,UBC,WWP2
ARRDC1	HC9473	7	0.4	0.01662	Predicted	substrate adhesion-dependent cell spreading	GTF2H1,LAMC1,LAMA5,ORMDL3,LAMB1,CTRL,LRP1
ARRDC1	HC2676	4	0.49	0.03451	Literature	calcium- and calmodulin-dependent protein kinase complex	CAMK1G,CAMK2D,CAMK1D,CAMK2G
ARRDC1	HC5667	12	0.5	0.001475	Predicted	ubiquitin-dependent protein catabolic process	PTEN,ITCH,UBE2L3,ARRDC1,NEDD4L,SLC11A2,NDFIP2,NDFIP1,NEDD4,POLR2A,UBC,WWP2
ARRDC1	HC6473	12	0.5	0.001475	Predicted	ubiquitin-dependent protein catabolic process	HGS,ITCH,ARRDC1,TSG101,NEDD4L,SLC11A2,UBB,NDFIP2,NDFIP1,UBC,NEDD4,WWP2
ARRDC1	HC8097	8	0.5	0.007534	Predicted	substrate adhesion-dependent cell spreading	PGP,LAMC1,LAMB1,LRP1,LAMB2,LAMA5,SPRY2,CTRL
ARRDC1	HC6850	6	0.5	0.006459	Predicted	axon guidance	LAMC1,FOS,APP,LAMA5,LAMB1,CENPF
ARRDC1	HC8116	6	0.5	0.006459	Predicted	signal transduction	YWHAQ,ARRDC1,WWP1,NEDD4,ARRDC3,STK4
ARRDC1	HC266	4	0.5	0.03082	Literature	CPSF6-ITCH-NUDT21-POLR2A complex	NUDT21,CPSF6,ITCH,POLR2A
ARRDC1	HC2149	11	0.571	3.432e-05	Literature	protein ubiquitination involved in ubiquitin-dependent protein catabolic process	ITCH,USP28,NEDD4L,WWP1,USP25,SMURF2,SMURF1,NEDD4,USP5,WWP2,USP13
ARRDC1	HC2978	11	0.636	2.457e-06	Literature	cell morphogenesis involved in differentiation	LAMA4,LAMA3,NUP210,LAMC1,LAMB1,NUP210L,LAMB2,LAMC3,LAMC2,LAMA5,LAMB4
ARRDC1	HC1943	5	0.667	0.001742	Literature	ITGA6-ITGB4-Laminin10/12 complex	LAMB2,ITGB4,LAMC1,ITGA6,LAMA5
ARRDC1	HC3258	3	0.99	0.001771	Literature	TSG101-VPS37B-VPS28 complex	TSG101,VPS28,VPS37B
ARRDC1	HC3360	7	0.994	5.253e-12	Literature	laminin-1 complex	LAMA4,LAMA2,LAMA3,LAMC1,LAMA1,LAMA5,LAMB1
ARRDC2	HC8791	15	0.456	0.01153	Predicted	nuclear mRNA splicing, via spliceosome	KIF4A,PRPF8,SNW1,SNRNP200,TRAP1,SF3B1,PLRG1,EFTUD2,PNN,SRRM2,SF3A2,PRPF19,CDC5L,SF3B3,SF3B2
ARRDC2	HC6115	15	0.473	0.007406	Predicted	DNA damage response, signal transduction by p53 class mediator resulting in cell cycle arrest	PSMD2,PSMD1,PSMD13,PSMC6,TBP,UCHL5,PSMC2,PSMD14,PSMD7,PSMA1,GTF3C3,PSMC5,PSMD6,PSMC1,PSMC4
ARRDC2	HC6419	14	0.492	0.01105	Predicted	nuclear mRNA splicing, via spliceosome	SNRPA1,PRPF8,SNW1,SNRNP200,PLRG1,RBM22,YTHDC2,EFTUD2,CRNKL1,PNN,SRRM2,SF3A2,PRPF19,CDC5L
ARRDC2	HC1372	18	0.5	0.003733	Literature	Proteasome, 19S regulatory particle (PA700)	PSMC3,PSMD7,PSMD4,PSMC4,PSMD2,PSMD1,PSMD13,PSMC6,PSMD3,PSMD8,SEM1,PSMC2,PSMD14,PSMD11,PSMD6,PSMC5,PSMC1,PSMD12
ARRDC2	HC4628	7	0.57	0.01085	Predicted	nuclear mRNA splicing, via spliceosome	USP39,MEPCE,PRPF8,PRPF4,PRPF3,PRPF31,SART3
ARRDC2	HC111	5	0.66	0.01039	Literature	SMN complex (GEMIN5,2,3,4, SMN)	DDX20,GEMIN5,GEMIN4,GEMIN2,SMN1
ARRDC2	HC1224	6	0.79	0.0003321	Literature	CFP1	ASH2L,WDR82,WDR5,RBBP5,SETD1A,CXXC1
ARRDC2	HC984	3	0.92	0.01922	Literature	LLGL1-PAR-6B-PRKCI complex	LLGL1,PARD6B,PRKCI
ARRDC2	HC277	3	0.98	0.0123	Literature	BAT3 complex	UBL4A,BAG6,GET4
ARRDC3	HC9471	14	0.653	0.03896	Predicted	nuclear mRNA splicing, via spliceosome	U2AF2,SRSF2,CDK9,SRSF6,RNPS1,LARP1B,SRSF5,CDK12,RBM39,SF3A2,POLR2A,SRPK1,SRPK2,SRSF1
ARRDC3	HC6135	15	0.674	0.02545	Predicted	nuclear mRNA splicing, via spliceosome	SNRPA1,WBP11,SART1,SNW1,SNRPB2,SF3B1,PLRG1,SF3A3,SF3A2,SNRPN,PRPF19,SF3A1,CDC5L,SF3B3,SF3B2
ARRDC3	HC8758	15	0.677	0.02453	Predicted	nuclear mRNA splicing, via spliceosome	SNRPA1,SNW1,SF3B1,SPEN,PLRG1,DNAJC17,SF3A3,SRRM2,SF3A2,HNRNPM,PRPF19,SF3A1,CDC5L,SF3B3,SF3B2
ARRDC3	HC7399	15	0.711	0.01343	Predicted	nuclear mRNA splicing, via spliceosome	SNRPA1,U2AF2,SNW1,SNRNP200,SF3B4,SF3B1,SF3B6,SF3A3,SF3A2,RBM39,SF3A1,PUF60,CDC5L,SF3B3,SF3B2
ARRDC3	HC8791	15	0.717	0.01212	Predicted	nuclear mRNA splicing, via spliceosome	KIF4A,PRPF8,SNW1,SNRNP200,TRAP1,SF3B1,PLRG1,EFTUD2,PNN,SRRM2,SF3A2,PRPF19,CDC5L,SF3B3,SF3B2
ARRDC3	HC8304	12	0.717	0.03237	Predicted	nuclear mRNA splicing, via spliceosome	U2AF2,SNW1,SF3B4,SF3B1,GNAL,SRRM2,TCERG1,RBM39,SF3B2,RPS13,CDC5L,SF3B3
ARRDC3	HC9705	15	0.727	0.01005	Predicted	nuclear mRNA splicing, via spliceosome	SNRPA1,PRPF8,SNW1,SNRNP200,SF3B1,EFTUD2,SF3A3,PRPF3,SNRPN,SF3A2,CD2BP2,SF3A1,CDC5L,SF3B3,SF3B2
ARRDC3	HC9446	15	0.733	0.008844	Predicted	nuclear mRNA splicing, via spliceosome	GPKOW,SNW1,SNRNP200,SF3B4,SF3B1,SUZ12,HTATSF1,SF3B6,SRRM2,DHX30,SF3A2,SF3B2,SF3B3,SF3A1,CDC5L
ARRDC3	HC4378	15	0.739	0.007939	Predicted	nuclear mRNA splicing, via spliceosome	SNRPA1,SART1,WDR75,SNW1,CHM,SF3B4,SF3B1,RAE1,SF3A3,SRRM2,SF3A2,SF3B3,SF3A1,CDC5L,SF3B2
ARRDC3	HC1948	6	0.742	0.04273	Literature	Scrib-beta-PIX-GIT1 complex	SCRIB,GIT1,LRRC1,ARHGEF6,ARHGEF7,GIT2
ARRDC3	HC3798	12	0.743	0.02251	Predicted	nuclear mRNA splicing, via spliceosome	U2AF2,DDX3X,EIF4G1,SRSF2,NCBP1,FBL,POLDIP3,EIF4E,EIF4G2,PABPN1,LARP1,SRSF1
ARRDC3	HC6517	14	0.744	0.008153	Predicted	nuclear mRNA splicing, via spliceosome	CPSF1,GLIS2,CSTF3,XAB2,CLP1,CSTF2,GTF3C3,PCF11,CPSF3,CPSF2,CDC73,UBC,POLR2A,PAPOLA
ARRDC3	HC4996	8	0.75	0.04535	Predicted	neuron development	PARD6G,CDC42,TRAF2,LLGL1,PRKCI,NUMB,PARD3,NIN
ARRDC3	HC1914	6	0.75	0.03947	Literature	POLR2A-CCNT1-CDK9-NCL-LEM6-CPSF2 complex	NCL,PPARGC1A,CCNT1,CPSF2,CDK9,POLR2A
ARRDC3	HC8133	6	0.772	0.0309	Predicted	mitotic chromosome condensation	NCAPD2,SNW1,SMC2,NCAPH,CDC5L,SMC4
ARRDC3	HC5588	15	0.777	0.00367	Predicted	nuclear mRNA splicing, via spliceosome	SNRPA1,SNW1,SF3B4,SF3B1,PLRG1,RNPS1,SF3A3,SRRM2,SF3A2,PRPF19,PRPF40A,SF3A1,CDC5L,SF3B3,SF3B2
ARRDC3	HC3967	15	0.781	0.003336	Predicted	nuclear mRNA splicing, via spliceosome	CPSF1,SSU72,CSTF3,CLP1,CSTF2,WDR82,PCF11,WDR33,CPSF3,FIP1L1,CPSF2,PPP1CC,RBBP6,ZC3H4,PAPOLA
ARRDC3	HC4214	15	0.782	0.003258	Predicted	nuclear mRNA splicing, via spliceosome	CPSF1,SSU72,CSTF3,RRAGA,CSTF2,WDR82,CPSF4,WDR33,CPSF3,FIP1L1,CPSF2,CDC73,POLR2A,RBBP6,PAPOLA
ARRDC3	HC5543	15	0.784	0.003105	Predicted	nuclear mRNA splicing, via spliceosome	SNRPA1,PRPF8,SNW1,SNRNP200,SF3B1,PLRG1,EFTUD2,SF3A3,SRRM2,SF3A2,SF3B3,PRPF19,SF3A1,CDC5L,SF3B2
ARRDC3	HC1496	7	0.796	0.01309	Literature	axon guidance	CSNK2A1,EFCAB14,LY6G5B,CSNK2B,PRPF38A,MFAP1,CSNK2A2
ARRDC3	HC6799	15	0.8	0.002204	Predicted	nuclear mRNA splicing, via spliceosome	U2AF2,SNW1,SRSF2,SF3B4,U2AF1,SF3B1,CYP3A5,RNPS1,SRRM2,RBM39,PRPF40A,PUF60,CDC5L,SF3B2,SF3B3
ARRDC3	HC2250	5	0.813	0.04105	Literature	TFIIIC containing complex TFIIIC2	GTF3C2,GTF3C1,GTF3C3,GTF3C5,GTF3C4
ARRDC3	HC4595	5	0.817	0.03982	Predicted	nuclear mRNA splicing, via spliceosome	SUGP1,U2AF2,FBL,GIGYF2,U2AF1
ARRDC3	HC5114	15	0.829	0.001131	Predicted	nuclear mRNA splicing, via spliceosome	SNW1,CPSF1,CSTF3,CLP1,CSTF2,GTF3C3,PCF11,FIP1L1,CPSF3,CPSF4,CPSF2,CDC73,POLR2A,CSTF1,PAPOLA
ARRDC3	HC6443	12	0.857	0.003756	Predicted	nuclear mRNA splicing, via spliceosome	RBM17,U2AF2,SNW1,SF3B4,SF1,SF3B1,TCERG1,RBM39,SF3B3,SF3B2,PRPF40A,CDC5L
ARRDC3	HC9009	6	0.862	0.0104	Predicted	nuclear mRNA splicing, via spliceosome	SNW1,CPSF3,CPSF2,CDC73,SMARCAD1,CDC5L
ARRDC3	HC3481	7	0.89	0.003071	Literature	tight junction assembly	PARD6A,PARD6G,LLGL2,LLGL1,PARD6B,PRKCI,PRKCZ
ARRDC3	HC4487	7	0.964	0.0008253	Predicted	axon guidance	CSNK2A1,CSNK2B,UTP14A,UTP18,FKBP3,CSNK2A2,HDAC2
ARRDC3	HC53	4	0.98	0.02227	Literature	rRNA processing	WDR3,PWP2,WDR36,TBL3
ARRDC3	HC2126	4	0.985	0.02136	Literature	Exon junction complex (EIF4A3-MLN51-MAGOH-Y14)	EIF4A3,RBM8A,MAGOH,CASC3
ARRDC3	HC3118	5	0.993	0.006115	Literature	aPKC-PAR-6-PAR-3 cell polarity complex	PARD6G,PARD3B,PARD3,PARD6B,PRKCI
ARRDC3	HC3354	6	1	0.001398	Literature	Epithelial utrophin-associated protein complex	DTNB,DMD,SNTB1,DTNA,SNTB2,UTRN
ARRDC3	HC2858	4	1	0.01884	Literature	Casein kinase II-HMG1 complex	CSNK2A1,CSNK2B,HMGB1,CSNK2A2
ARRDC3	HC6370	4	1	0.01884	Predicted	mRNA metabolic process	CSNK2A1,SRRM2,YWHAB,RNPS1
TXNIP	HC9705	15	0.469	0.02917	Predicted	nuclear mRNA splicing, via spliceosome	SNRPA1,PRPF8,SNW1,SNRNP200,SF3B1,EFTUD2,SF3A3,PRPF3,SNRPN,SF3A2,CD2BP2,SF3A1,CDC5L,SF3B3,SF3B2
TXNIP	HC2942	10	0.503	0.03393	Literature	HDAC1	RBBP7,MBD2,MTA1,HDAC1,RCOR1,ACTB,CHD4,RBBP4,MBD3,KDM1A
TXNIP	HC2167	8	0.518	0.04302	Literature	mSin3-HDAC	HDAC1,SIN3B,BRMS1,SIN3A,RBBP4,RBBP7,HDAC2,SAP30
TXNIP	HC2751	8	0.528	0.03761	Literature	NuRD.1 complex	HDAC1,CHD4,MTA3,RBBP4,RBBP7,MBD3,MTA1,HDAC2
TXNIP	HC7983	5	0.603	0.03297	Predicted	positive regulation of sequence-specific DNA binding transcription factor activity	UBE2D3,DDX58,RBCK1,TRIM25,RNF31
TXNIP	HC3533	5	0.613	0.02927	Literature	transcription initiation from RNA polymerase II promoter	TRIM2,RPAP2,SLC35G6,POLR2A,POLR2B
TXNIP	HC3218	4	0.695	0.02303	Literature	XFIM	GTF2IRD1,HDAC2,KDM1A,ZMYM3
TXNIP	HC1737	5	0.697	0.009863	Literature	Condensin II	SMC2,NCAPD3,NCAPH2,NCAPG2,SMC4
TXNIP	HC2283	7	0.698	0.001232	Literature	TFIIIC containing-TOP1-SUB1 complex	GTF3C2,SUB1,GTF3C1,GTF3C3,GTF3C5,TOP1,GTF3C4
TXNIP	HC208	9	0.71	0.0008069	Literature	MeCP1 complex	HDAC1,GATAD2B,CHD4,RBBP4,RBBP7,MBD3,MBD2,MTA2,HDAC2
TXNIP	HC3515	9	0.71	0.0008069	Literature	MTA2 complex	HDAC1,SIN3B,CHD4,SIN3A,RBBP4,RBBP7,MBD3,MTA2,HDAC2
TXNIP	HC600	8	0.762	0.0005838	Literature	HDAC2-asscociated core complex	GATAD2A,GATAD2B,RBBP4,RBBP7,MBD3,CHD3,MTA2,HDAC2
TXNIP	HC1958	3	0.84	0.04014	Literature	RPAP1-RPB2-RPB3 complex	POLR2C,RPAP1,POLR2B
TXNIP	HC2060	3	0.85	0.03762	Literature	mitochondrial processing peptidase complex	UQCRC1,PMPCB,PMPCA
TXNIP	HC6310	3	0.85	0.03762	Predicted	proteolysis	PMPCB,PMPCA,MRPL58
TXNIP	HC75	4	0.875	0.002603	Literature	histone H2B ubiquitination	CTR9,PAF1,WDR61,CDC73
TXNIP	HC1452	3	0.98	0.01506	Literature	LUBAC complex	RBCK1,RNF31,SHARPIN
TXNIP	HC1690	3	0.98	0.01506	Literature	N-NOS-CHIP-HSP70-1 complex	STUB1,NOS1,HSPA1A
TXNIP	HC3219	3	0.98	0.01506	Literature	Scrib-beta-PIX-GIT1 complex	SCRIB,GIT1,ARHGEF7
TXNIP	HC3246	3	0.98	0.01506	Literature	ARF-Mule complex	NPM1,HUWE1,CDKN2A
TXNIP	HC2250	5	0.993	4.862e-05	Literature	TFIIIC containing complex TFIIIC2	GTF3C2,GTF3C1,GTF3C3,GTF3C5,GTF3C4
TXNIP	HC277	3	1	0.01292	Literature	BAT3 complex	UBL4A,BAG6,GET4

## Sheet: B. Human DAVID GO (CC)
Baits (HGNC ID)	Category	Term	Count	%	PValue	Preys (HGNC ID)	List Total	Pop Hits	Pop Total	Fold Enrichment	Bonferroni	Benjamini	FDR
ARRDC4	GOTERM_CC_DIRECT	GO:0000502~proteasome complex	11	14.6667	3.60131e-14	PSMB5, PSMD13, PSMC5, PSMB3, PSMA3, PSMB2, PSMD1, PSMD2, PSMD4, UBE3C, PSMD8	74	60	18224	45.1495	5.64748e-12	5.64748e-12	4.32987e-11
ARRDC4	GOTERM_CC_DIRECT	GO:0005829~cytosol	40	53.3333	1.19513e-11	RAB9A, PPP6R3, CAD, PSMB5, GET4, BAG6, PEX1, PSMB3, WWP1, PSMB2, BAG2, PSMD1, PSMD2, RBCK1, PSMD4, ITCH, NEDD4L, PSMD8, RNF31, RHOBTB3, XPOT, MYO6, MAP1B, NF1, MYO1D, PI4KA, IPO9, KIF16B, SUGT1, SMC2, MON2, SMC4, PSMC5, PSMD13, HUWE1, PSMA3, MTR, UBL4A, JAK1, GNAS	74	3315	18224	2.97159	1.87636e-09	9.38179e-10	1.43844e-08
ARRDC4	GOTERM_CC_DIRECT	GO:0016020~membrane	30	40	1.75396e-09	MMS19, SLC20A1, CAD, ABCA3, BAG6, FANCI, WWP2, PSMD1, PSMB2, PSMD2, ITCH, MYO6, SLC12A2, NF1, PI4KA, IPO9, ABCB1, HERC2, MAGED2, GCN1, PSMC5, PSMD13, TFRC, HUWE1, LRP10, IPO4, UBL4A, JAK1, GNAS, CPD	74	2200	18224	3.35823	2.75371e-07	9.17903e-08	2.11103e-06
ARRDC4	GOTERM_CC_DIRECT	GO:0022624~proteasome accessory complex	6	8	5.34811e-09	PSMD13, PSMC5, PSMD1, PSMD2, PSMD4, PSMD8	74	17	18224	86.9189	8.39652e-07	2.09913e-07	6.43689e-06
ARRDC4	GOTERM_CC_DIRECT	GO:0070062~extracellular exosome	33	44	6.56055e-09	RAB9A, CAD, PSMB5, PEX1, WWP2, PSMB3, WWP1, PSMB2, PSMD1, PSMD2, ITCH, NEDD4L, PSMD8, RHOBTB3, MYO6, SLC12A2, PTPRF, MYO1B, PLXNB2, MYO1D, PI4KA, PTPRS, ABCB1, SMC2, MON2, PSMC5, PSMD13, TFRC, DSG2, HUWE1, PSMA3, GNAS, CPD	74	2811	18224	2.89111	1.03001e-06	2.06001e-07	7.89617e-06
ARRDC4	GOTERM_CC_DIRECT	GO:0005838~proteasome regulatory particle	5	6.66667	7.65371e-08	PSMD13, PSMC5, PSMD1, PSMD2, PSMD8	74	11	18224	111.941	1.20162e-05	2.00272e-06	9.21187e-05
ARRDC4	GOTERM_CC_DIRECT	GO:0005737~cytoplasm	40	53.3333	7.45504e-06	MMS19, PPP6R3, UBE3C, GET4, BAG6, PEX1, FANCI, WWP2, PSMB3, WWP1, PSMB2, ANKIB1, PSMD4, ITCH, NEDD4L, XPOT, MYO6, MYO1B, MAP1B, NF1, PI4KA, IPO9, HERC2, ANKRD13A, GCN1, SMC2, ATM, SMC4, PJA2, PSMC5, HUWE1, FANCD2, IPO4, SVIL, PSMA3, MTR, UBL4A, JAK1, PELO, GNAS	74	5222	18224	1.88641	0.00116976	0.000167193	0.0089724
ARRDC4	GOTERM_CC_DIRECT	GO:0008540~proteasome regulatory particle, base subcomplex	4	5.33333	1.32192e-05	PSMC5, PSMD1, PSMD2, PSMD4	74	12	18224	82.0901	0.00207328	0.000259395	0.0159092
ARRDC4	GOTERM_CC_DIRECT	GO:0071818~BAT3 complex	3	4	4.73569e-05	GET4, BAG6, UBL4A	74	3	18224	246.27	0.00740764	0.000825794	0.0569831
ARRDC4	GOTERM_CC_DIRECT	GO:0005839~proteasome core complex	4	5.33333	7.78714e-05	PSMB5, PSMB3, PSMA3, PSMB2	74	21	18224	46.9086	0.0121518	0.00122188	0.0936844
ARRDC4	GOTERM_CC_DIRECT	GO:0005654~nucleoplasm	25	33.3333	0.000134954	MMS19, PPP6R3, CAD, POLR2A, PSMB5, BAG6, FANCI, PSMB3, PSMD1, PSMB2, PSMD2, PSMD4, NEDD4L, PSMD8, XPOT, MYO6, HERC2, SMC2, ATM, SMC4, PSMD13, PSMC5, HUWE1, FANCD2, PSMA3	74	2784	18224	2.21148	0.0209663	0.00192444	0.162307
ARRDC4	GOTERM_CC_DIRECT	GO:0005905~clathrin-coated pit	4	5.33333	0.00139323	MYO6, TFRC, LRP10, LRP12	74	55	18224	17.9106	0.19659	0.0180755	1.66404
ARRDC4	GOTERM_CC_DIRECT	GO:0005634~nucleus	35	46.6667	0.00170583	MMS19, CAD, UBE3C, POLR2A, PSMB5, BAG6, WWP2, PSMB3, WWP1, PSMB2, PSMD1, PSMD2, PSMD4, ITCH, NEDD4L, PSMD8, MYO6, NF1, HERC2, SUGT1, SMC2, ATM, SMC4, PSMC5, PSMD13, HUWE1, FANCD2, SVIL, PSMA3, UBL4A, JAK1, CAND2, PELO, GNAS, CPD	74	5415	18224	1.59177	0.235126	0.0204077	2.03389
ARRDC4	GOTERM_CC_DIRECT	GO:0032588~trans-Golgi network membrane	4	5.33333	0.00450439	RAB9A, MYO1B, GNAS, RHOBTB3	74	83	18224	11.8684	0.507759	0.0493674	5.28867
ARRDC5	GOTERM_CC_DIRECT	GO:0016469~proton-transporting two-sector ATPase complex	5	13.1579	7.17728e-11	ATP6V1C1, ATP6V1A, ATP6AP1, ATP6V1E1, ATP6V1F	38	5	18224	479.579	7.03374e-09	7.03374e-09	7.936e-08
ARRDC5	GOTERM_CC_DIRECT	GO:0033180~proton-transporting V-type ATPase, V1 domain	5	13.1579	1.00046e-09	ATP6V1C1, ATP6V1A, ATP6AP1, ATP6V1B2, ATP6V1F	38	8	18224	299.737	9.80448e-08	4.90224e-08	1.10622e-06
ARRDC5	GOTERM_CC_DIRECT	GO:0005765~lysosomal membrane	10	26.3158	2.96421e-09	ATP6V0C, ATP6V1C1, ATP6V1A, ATP6V1E1, TLDC1, ATP6V1H, ATP11C, ATP6V1B2, ATP6V0D1, ATP6V0A2	38	274	18224	17.5029	2.90492e-07	9.68308e-08	3.27756e-06
ARRDC5	GOTERM_CC_DIRECT	GO:0070062~extracellular exosome	22	57.8947	8.68126e-09	CACNA2D1, SLC12A2, ATP6AP1, FLOT2, ATP6V1H, ERLIN2, ENDOD1, ATP6V1B2, PLPP1, STUB1, MYADM, ATP6V1F, ATP6V1C1, STOM, ATP6V0C, ATP6V1A, DSG2, ATP6V1E1, SLC2A1, CNTN1, ATP6V0A1, ATP6V0D1	38	2811	18224	3.75337	8.50763e-07	2.12691e-07	9.59896e-06
ARRDC5	GOTERM_CC_DIRECT	GO:0033179~proton-transporting V-type ATPase, V0 domain	4	10.5263	6.41716e-07	ATP6V0C, ATP6V0A1, ATP6V0D1, ATP6V0A2	38	9	18224	213.146	6.28862e-05	1.25776e-05	0.00070955
ARRDC5	GOTERM_CC_DIRECT	GO:0016471~vacuolar proton-transporting V-type ATPase complex	4	10.5263	1.67364e-06	ATP6V0A1, ATP6V0D1, ATP6V0A2, ATP6V1F	38	12	18224	159.86	0.000164004	2.73358e-05	0.00185055
ARRDC5	GOTERM_CC_DIRECT	GO:0016324~apical plasma membrane	7	18.4211	2.41338e-05	ATP6V1A, DSG2, SLC12A2, FLOT2, ATP6V1E1, SLC2A1, ATP6V0D1	38	291	18224	11.5363	0.00236234	0.00033782	0.0266817
ARRDC5	GOTERM_CC_DIRECT	GO:0016020~membrane	15	39.4737	5.44348e-05	SLC12A2, FLOT2, ATP11B, STOML2, ENDOD1, HERC2, PLPP1, KIDINS220, ATP6V1F, STOM, KIAA2013, SLC2A1, CNTN1, ABCD3, ATP6V0D1	38	2200	18224	3.26986	0.00532056	0.000666623	0.0601727
ARRDC5	GOTERM_CC_DIRECT	GO:0000220~vacuolar proton-transporting V-type ATPase, V0 domain	3	7.89474	5.98558e-05	ATP6V0C, ATP6V0A1, ATP6V0A2	38	6	18224	239.789	0.00584887	0.000651571	0.0661633
ARRDC5	GOTERM_CC_DIRECT	GO:0030670~phagocytic vesicle membrane	4	10.5263	0.000231581	ATP6V0C, ATP6V0A1, ATP6V0D1, ATP6V0A2	38	59	18224	32.5138	0.0224419	0.00226719	0.255764
ARRDC5	GOTERM_CC_DIRECT	GO:0005886~plasma membrane	19	50	0.000444663	CACNA2D1, SLC12A2, FLOT2, ATP11B, ATP6V1H, ERLIN2, ATP11C, ATP6V1B2, PLPP1, STUB1, MYADM, ABCG2, ATP6V1C1, ATP6V1A, DSG2, SLC2A1, CNTN1, ATP6V0A1, ATP6V0A2	38	4121	18224	2.21111	0.0426504	0.00395458	0.490571
ARRDC5	GOTERM_CC_DIRECT	GO:0010008~endosome membrane	5	13.1579	0.000522526	ATP6V0C, ATP6AP1, ATP6V0A1, ATP6V0D1, ATP6V0A2	38	185	18224	12.9616	0.0499313	0.00425932	0.576247
ARRDC5	GOTERM_CC_DIRECT	GO:0045121~membrane raft	5	13.1579	0.000781922	STOM, CNTN1, ERLIN2, STOML2, MYADM	38	206	18224	11.6403	0.0737938	0.00587944	0.861188
ARRDC5	GOTERM_CC_DIRECT	GO:0016021~integral component of membrane	21	55.2632	0.00087369	SLC12A2, ATP6AP1, ATP11B, KCTD20, ERLIN2, ERLIN1, ATP11C, ATP6V1B2, KIDINS220, PLPP1, HMGA1, MYADM, ABCG2, ATP6V0C, KIAA2013, DSG2, SLC2A1, LMTK2, ABCD3, ATP6V0A1, ATP6V0A2	38	5163	18224	1.95064	0.0820929	0.00609982	0.961815
ARRDC5	GOTERM_CC_DIRECT	GO:0042470~melanosome	4	10.5263	0.00111959	STOM, SLC2A1, ATP6V0A1, ATP6V1B2	38	101	18224	18.9932	0.10397	0.00729206	1.231
ARRDC5	GOTERM_CC_DIRECT	GO:0030864~cortical actin cytoskeleton	3	7.89474	0.00343691	FLOT2, SLC2A1, MYADM	38	43	18224	33.459	0.286375	0.0208665	3.73522
ARRDC5	GOTERM_CC_DIRECT	GO:0005902~microvillus	3	7.89474	0.00596715	ATP6V1A, ATP6V1E1, ATP6V1B2	38	57	18224	25.241	0.443747	0.0339135	6.40349
ARRDC5	GOTERM_CC_DIRECT	GO:0000221~vacuolar proton-transporting V-type ATPase, V1 domain	2	5.26316	0.00607884	ATP6V1C1, ATP6V1H	38	3	18224	319.719	0.449839	0.032652	6.51971
ARRDC1	GOTERM_CC_DIRECT	GO:0005604~basement membrane	5	18.5185	4.54727e-06	LAMA1, LAMB2, LAMA5, NID1, LAMC1	27	79	18224	42.7192	0.000472805	0.000472805	0.0050843
ARRDC1	GOTERM_CC_DIRECT	GO:0043260~laminin-11 complex	3	11.1111	5.86664e-06	LAMB2, LAMA5, LAMC1	27	3	18224	674.963	0.000609946	0.00030502	0.00655945
ARRDC1	GOTERM_CC_DIRECT	GO:0070062~extracellular exosome	15	55.5556	6.38509e-06	MYO5A, TSG101, UTRN, MYO1D, NID1, HADHB, LAMB2, NEDD4, LAMA5, WWP2, WWP1, NEDD4L, LAMC1, SMURF1, ITCH	27	2811	18224	3.60172	0.000663832	0.000221326	0.00713911
ARRDC1	GOTERM_CC_DIRECT	GO:0031012~extracellular matrix	6	22.2222	5.43304e-05	LAMA1, LAMB2, LAMA5, NID1, LAMC1, HADHA	27	296	18224	13.6817	0.00563458	0.00141163	0.0607315
ARRDC1	GOTERM_CC_DIRECT	GO:0005605~basal lamina	3	11.1111	0.00020318	LAMB2, LAMA5, NID1	27	15	18224	134.993	0.0209112	0.00421766	0.226947
ARRDC1	GOTERM_CC_DIRECT	GO:0005608~laminin-3 complex	2	7.40741	0.00285142	LAMA1, LAMB2	27	2	18224	674.963	0.256935	0.0482903	3.14238
ARRDC2	GOTERM_CC_DIRECT	GO:0005737~cytoplasm	34	72.3404	8.57245e-11	HECW2, USP9X, HCFC1, PPP6R3, UBE3C, SART3, LLGL1, RANBP9, BAG6, PEX1, WWP2, WWP1, PSMD3, PSMD4, DDX20, ITCH, NEDD4L, TUBA1C, GEMIN4, ZCCHC2, WDR6, MAP1B, UBR4, FLNC, TUBGCP2, FARP2, PJA2, EPB41L3, PJA1, SMU1, HDAC2, HUWE1, PRKAR1A, TSC2	44	5222	18224	2.6967	9.08679e-09	9.08679e-09	9.61915e-08
ARRDC2	GOTERM_CC_DIRECT	GO:0000502~proteasome complex	7	14.8936	5.46457e-09	PSMB5, PSMD13, PSMD1, PSMD3, PSMD4, UBE3C, PSMD8	44	60	18224	48.3212	5.79244e-07	2.89622e-07	6.1318e-06
ARRDC2	GOTERM_CC_DIRECT	GO:0005654~nucleoplasm	23	48.9362	4.11479e-08	SETD1A, UBR4, HCFC1, PPP6R3, SART3, TUBGCP2, BOD1L1, POLR2A, PSMB5, PSMD13, BAG6, HDAC2, ASH2L, HUWE1, PSMD1, SNRNP200, PSMD3, PSMD4, NEDD4L, DDX20, GEMIN4, PSMD8, CPSF1	44	2784	18224	3.42176	4.36166e-06	1.45389e-06	4.61721e-05
ARRDC2	GOTERM_CC_DIRECT	GO:0022624~proteasome accessory complex	5	10.6383	6.25219e-08	PSMD13, PSMD1, PSMD3, PSMD4, PSMD8	44	17	18224	121.818	6.6273e-06	1.65683e-06	7.01559e-05
ARRDC2	GOTERM_CC_DIRECT	GO:0005829~cytosol	23	48.9362	9.73179e-07	USP9X, MAP1B, PPP6R3, FLNC, TUBGCP2, FARP2, PSMB5, RANBP9, PSMD13, BAG6, HUWE1, PEX1, WWP1, PSMD1, TSC2, PRKAR1A, PSMD3, PSMD4, NEDD4L, DDX20, ITCH, GEMIN4, PSMD8	44	3315	18224	2.87366	0.000103152	2.06312e-05	0.001092
ARRDC2	GOTERM_CC_DIRECT	GO:0005634~nucleus	28	59.5745	7.05199e-06	HECW2, SETD1A, HCFC1, UBE3C, SART3, POLR2A, PSMB5, RANBP9, BAG6, ASH2L, WWP2, WWP1, PSMD1, PSMD3, PSMD4, DDX20, NEDD4L, ITCH, PSMD8, TUBA1C, GEMIN4, SMU1, HDAC2, PSMD13, HUWE1, SNRNP200, TSC2, CPSF1	44	5415	18224	2.14166	0.000747234	0.000124578	0.00791277
ARRDC2	GOTERM_CC_DIRECT	GO:0016020~membrane	16	34.0426	8.87758e-05	USP9X, UBR4, HCFC1, TUBGCP2, PSMD13, BAG6, HUWE1, WWP2, PSMD1, SNRNP200, TSC2, PRKAR1A, PSMD3, DDX20, ITCH, GEMIN4	44	2200	18224	3.01223	0.00936651	0.00134348	0.0995703
ARRDC2	GOTERM_CC_DIRECT	GO:0008541~proteasome regulatory particle, lid subcomplex	3	6.38298	0.000150904	PSMD13, PSMD3, PSMD8	44	8	18224	155.318	0.0158698	0.00199764	0.1692
ARRDC2	GOTERM_CC_DIRECT	GO:0005838~proteasome regulatory particle	3	6.38298	0.000295089	PSMD13, PSMD1, PSMD8	44	11	18224	112.959	0.0307998	0.00346997	0.330621
ARRDC2	GOTERM_CC_DIRECT	GO:0048188~Set1C/COMPASS complex	3	6.38298	0.000295089	ASH2L, SETD1A, HCFC1	44	11	18224	112.959	0.0307998	0.00346997	0.330621
ARRDC2	GOTERM_CC_DIRECT	GO:0005719~nuclear euchromatin	3	6.38298	0.00183862	ASH2L, SETD1A, POLR2A	44	27	18224	46.0202	0.177225	0.0193183	2.04384
ARRDC3	GOTERM_CC_DIRECT	GO:0005654~nucleoplasm	66	42.8571	1.18075e-16	SRSF1, NCBP1, RBM15B, U2AF2, UTRN, U2SURP, CCNT1, ZNF638, SART1, PNN, LARP1, CSNK2A2, WDR75, MIOS, WDR36, MCM7, CSNK2A1, BAG6, CUL7, ZCCHC8, IK, TNIK, TTC37, CDK9, SPEN, MCM3, RBBP6, LPIN1, CDK5, MCM5, CLPX, EIF4A3, SNRNP200, CFAP20, RUVBL2, RUVBL1, CPSF3, CPSF2, CPSF1, COPE, BCLAF1, FIP1L1, CAMK2G, SCRIB, POLR2A, NUMA1, CAMK2D, NEDD4L, PRPF40A, ZC3H14, ZC3H18, SMAD5, SAP18, SNW1, TRIM25, RNPS1, …	151	2784	18224	2.86116	2.83107e-14	2.83107e-14	1.44329e-13
ARRDC3	GOTERM_CC_DIRECT	GO:0005737~cytoplasm	81	52.5974	1.72497e-10	SRSF1, COPA, NCBP1, CHERP, PDLIM5, UTRN, IQGAP2, IARS2, ZNF638, SART1, ZIC2, LARP1, TRIM4, TRIM5, MIOS, MCM7, DDX28, TRIM3, BAG6, CUL7, WWP1, SNTB2, ITCH, DHX30, WDR34, TFIP11, FMNL3, ARHGEF2, ZCCHC2, TNIK, C2CD5, TTC37, PI4KA, CDK9, IPO9, LPIN1, CDK5, SLIT2, CLPX, FARP2, EPB41L3, MAP4K4, SMU1, EIF4A3, MLLT11, SDCBP, RUVBL2, ADAMTS1, RUVBL1, BCLAF1, CTNND1, EPB41L4B, UBE3C, LLGL1, SCRIB, NUMA1, C…	151	5222	18224	1.87204	4.39867e-08	2.19933e-08	2.24788e-07
ARRDC3	GOTERM_CC_DIRECT	GO:0016607~nuclear speck	15	9.74026	1.2045e-09	ZC3H14, TFIP11, SRSF1, BCLAF1, U2AF2, SAP18, RNPS1, ZNF638, PNN, SF3A3, EIF4A3, THRAP3, DYRK1A, RBM15, PRPF40A	151	201	18224	9.00662	3.07148e-07	1.02383e-07	1.56964e-06
ARRDC3	GOTERM_CC_DIRECT	GO:0071013~catalytic step 2 spliceosome	11	7.14286	4.27346e-09	TFIP11, SRSF1, EIF4A3, CWC27, SNRNP200, GPATCH1, SNW1, SART1, PNN, SF3A3, ZCCHC8	151	92	18224	14.4302	1.08973e-06	2.72433e-07	5.56893e-06
ARRDC3	GOTERM_CC_DIRECT	GO:0035145~exon-exon junction complex	6	3.8961	8.3114e-07	SRSF1, EIF4A3, THRAP3, SAP18, RNPS1, PNN	151	22	18224	32.9151	0.000211918	4.23873e-05	0.00108309
ARRDC3	GOTERM_CC_DIRECT	GO:0005829~cytosol	53	34.4156	1.04194e-06	COPA, NCBP1, PDLIM5, CEP78, IQGAP2, IARS2, SART1, CSNK2A2, MCCC2, TRIM5, COPB2, BAG6, CSNK2A1, MCM7, HTRA2, PBXIP1, CUL7, WWP1, DEPDC1B, ITCH, FMNL2, ARHGEF2, FMNL3, BCR, PI4KA, IPO9, LPIN1, CDK5, RBBP6, FARP2, EIF4A3, SDCBP, COPE, PARD3, CAMK2G, CTNND1, PAXBP1, NUMA1, DMD, CAMK2D, NEDD4L, ABR, SMAD5, NF1, MAP1B, TRIM26, RNPS1, TRIM25, BIRC2, SMC2, NFKBIL1, NEDD4, AMOT	151	3315	18224	1.92956	0.000265659	4.42814e-05	0.00135778
ARRDC3	GOTERM_CC_DIRECT	GO:0016020~membrane	40	25.974	2.20355e-06	COPA, CHERP, PDLIM5, CAMK2G, UTRN, DNAJC10, ESYT2, PNN, LARP1, BAG6, MCM7, HTRA2, CAMK2D, SNTB2, WDR11, ITCH, PRPF40A, ABR, BCR, SLC12A2, NF1, PI4KA, CDK9, IPO9, MCM3, MAGED2, CDK5, GCN1, MCM5, SLIT2, EIF4A3, POLD1, SNRNP200, DDX50, SDCBP, RUVBL2, RUVBL1, CPSF2, DDX52, SLC25A17	151	2200	18224	2.19434	0.000561748	8.02691e-05	0.0028715
ARRDC3	GOTERM_CC_DIRECT	GO:0005847~mRNA cleavage and polyadenylation specificity factor complex	5	3.24675	4.13959e-06	FIP1L1, CPSF3, CPSF2, WDR33, CPSF1	151	14	18224	43.1031	0.00105504	0.000131941	0.00539434
ARRDC3	GOTERM_CC_DIRECT	GO:0005856~cytoskeleton	14	9.09091	1.24041e-05	PARD3, ARHGEF2, TNIK, MYO1E, UTRN, PTPN13, EPB41L4B, CDK5, LLGL1, FARP2, EPB41L3, HTRA2, DMD, SDCBP	151	371	18224	4.55429	0.00315808	0.000351391	0.0161631
ARRDC3	GOTERM_CC_DIRECT	GO:0005913~cell-cell adherens junction	12	7.79221	7.63645e-05	FMNL2, PDLIM5, PI4KA, SDCBP, CTNND1, TRIM25, RUVBL1, ESYT2, GCN1, SCRIB, PDXDC1, LARP1	151	323	18224	4.48379	0.0192853	0.00194547	0.0994681
ARRDC3	GOTERM_CC_DIRECT	GO:0005634~nucleus	66	42.8571	0.000262969	SRSF1, NCBP1, U2AF2, U2SURP, CCNT1, ZNF638, WDR82, ZIC2, CSNK2A2, TRIM5, MIOS, MCM7, CSNK2A1, DDX28, BAG6, CUL7, PBXIP1, HTRA2, WWP1, ITCH, DHX30, WDR33, ZCCHC8, IK, TNIK, TTC37, SPEN, MCM3, RBBP6, LPIN1, CDK5, MCM5, SMU1, MLLT11, SNRNP200, SDCBP, RUVBL2, RUVBL1, CPSF1, BCLAF1, CTNND1, PAXBP1, UBE3C, POLR2A, NUMA1, DMD, CAMK2D, WDR11, NEDD4L, ZC3H14, SMAD5, NF1, PTPN13, RNPS1, SNW1, BIRC2, SMC2, …	151	5415	18224	1.471	0.0648665	0.00607836	0.342145
ARRDC3	GOTERM_CC_DIRECT	GO:0043234~protein complex	12	7.79221	0.00061865	ARHGEF2, PARD3, BCR, DMD, UTRN, SMAD5, WDR6, CAMK2D, SNTB2, BIRC2, RBM17, DTNA	151	412	18224	3.51521	0.145983	0.0130643	0.803195
ARRDC3	GOTERM_CC_DIRECT	GO:0008024~cyclin/CDK positive transcription elongation factor complex	3	1.94805	0.00098783	CCNT1, CDK9, SNW1	151	6	18224	60.3444	0.222772	0.0191995	1.27966
ARRDC3	GOTERM_CC_DIRECT	GO:0005681~spliceosomal complex	6	3.8961	0.0010771	TFIP11, U2AF2, SNRNP200, SNW1, SF3A3, RBM17	151	94	18224	7.70354	0.240283	0.0194379	1.39456
ARRDC3	GOTERM_CC_DIRECT	GO:0005730~nucleolus	17	11.039	0.00188452	ZC3H14, TFIP11, IK, BCLAF1, RBM15B, CCNT1, NF1, RBBP6, SMC2, POLR2A, WDR75, WDR36, DDX28, NOLC1, DDX50, DDX52, WDR33	151	857	18224	2.39406	0.38184	0.0315584	2.42816
ARRDC3	GOTERM_CC_DIRECT	GO:0042555~MCM complex	3	1.94805	0.00233261	MCM7, MCM3, MCM5	151	9	18224	40.2296	0.448719	0.0365353	2.99743
ARRDC3	GOTERM_CC_DIRECT	GO:0005911~cell-cell junction	7	4.54545	0.00302729	EPB41L3, PARD3, DSG2, MYO1E, CTNND1, SCRIB, PNN	151	172	18224	4.91175	0.538434	0.0444596	3.87394
TXNIP	GOTERM_CC_DIRECT	GO:0005654~nucleoplasm	20	44.4444	1.50411e-06	PAPD7, CAD, HERC2, RBBP7, RLIM, SCRIB, POLR2A, PSMB5, BAG6, HDAC2, HUWE1, PSMD1, ECD, PSMD4, NEDD4L, WDHD1, CHAF1B, GTF3C1, KDM5C, GTF3C3	41	2784	18224	3.19316	0.000135361	0.000135361	0.00163628
TXNIP	GOTERM_CC_DIRECT	GO:0005737~cytoplasm	25	55.5556	3.47027e-05	UBE3C, RLIM, SCRIB, GET4, BAG6, WWP2, WWP1, ECD, PSMD4, WDR11, ITCH, NEDD4L, WDHD1, ZCCHC2, MAP1B, PAPD7, PI4KA, HERC2, PJA2, PJA1, EPB41L3, HDAC2, HUWE1, MTR, CHAF1B	41	5222	18224	2.12796	0.00311843	0.00156043	0.0377457
TXNIP	GOTERM_CC_DIRECT	GO:0005634~nucleus	24	53.3333	0.000231134	PAPD7, CAD, HERC2, UBE3C, RBBP7, RLIM, POLR2A, PSMB5, BAG6, HDAC2, PKN3, HUWE1, WWP2, WWP1, PSMD1, ECD, WDR11, PSMD4, NEDD4L, ITCH, CHAF1B, GTF3C1, KDM5C, GTF3C3	41	5415	18224	1.97003	0.0205896	0.00691084	0.251158
TXNIP	GOTERM_CC_DIRECT	GO:0000502~proteasome complex	4	8.88889	0.00030737	PSMB5, PSMD1, PSMD4, UBE3C	41	60	18224	29.6325	0.0272883	0.00689302	0.333873
TXNIP	GOTERM_CC_DIRECT	GO:0005829~cytosol	17	37.7778	0.00103148	MAP1B, PI4KA, CAD, KIF16B, RLIM, GET4, PSMB5, NPHP3, BAG6, HUWE1, WWP1, MTR, PSMD1, PSMD4, NEDD4L, ITCH, CHAF1B	41	3315	18224	2.27942	0.0886983	0.0184048	1.11642

## Sheet: C. Fly COMPLEAT Summary
Bait (Annotation Id)	Bait (Flybase ld)	Bait (Symbol)	Complex ID	Size	Score	p-value	Type	Name	prediction method	prediction source	species	Genes (Annotation Id)	Genes (Flybase ID)	Genes (Symbols)
CG18746	FBgn0042103	CG18746	FC2688	13	0.523	0.0479	Literature	nuclear mRNA splicing, via spliceosome	Predicted by MS data (cluster was obtained from literature)	Additional publication	Fly	CG1965,CG15525,CG8264,CG6015,CG9667,CG1639,CG8877,CG3193,CG6197,CG3436,CG4849,CG7238,CG5931	FBgn0037466,FBgn0039732,FBgn0004856,FBgn0038927,FBgn0037550,FBgn0001491,FBgn0033688,FBgn0000377,FBgn0033859,FBgn0031229,FBgn0039566,FBgn0024191,FBgn0004713	CG1965,CG15525,Bx42,CG6015,CG9667,l(1)10Bb,Prp8,crn,fand,CG3436,CG4849,sip1,FBgn0004713
CG18746	FBgn0042103	CG18746	FC6248	15	0.524	0.0299	Predicted	nuclear mRNA splicing, via spliceosome	NetworkBlast	Predicted from PPI network	Fly & Yeast	CG31211,CG6015,CG8264,CG15084,CG6905,CG1796,CG2261,CG9667,CG3019,CG7971,CG8877,CG3193,CG10689,CG6197,CG4849	FBgn0051211,FBgn0038927,FBgn0004856,FBgn0034402,FBgn0035136,FBgn0030365,FBgn0039867,FBgn0037550,FBgn0003638,FBgn0035253,FBgn0033688,FBgn0000377,FBgn0086444,FBgn0033859,FBgn0039566	CG31211,CG6015,Bx42,CG15084,FBgn0035136,Tango4,CstF50,CG9667,su(w[a]),CG7971,Prp8,crn,l(2)37Cb,fand,CG4849
CG18746	FBgn0042103	CG18746	FC4856	15	0.554	0.017	Predicted	nuclear mRNA splicing, via spliceosome	NetworkBlast	Predicted from PPI network	Human & Fly	CG6015,CG8264,CG15084,CG6905,CG1796,CG9667,CG31368,CG1258,CG8877,CG1639,CG3193,CG6197,CG4849,CG6674,CG17187	FBgn0038927,FBgn0004856,FBgn0034402,FBgn0035136,FBgn0030365,FBgn0037550,FBgn0051368,FBgn0011692,FBgn0033688,FBgn0001491,FBgn0000377,FBgn0033859,FBgn0039566,FBgn0036063,FBgn0037882	CG6015,Bx42,CG15084,FBgn0035136,Tango4,CG9667,CG31368,pav,Prp8,l(1)10Bb,crn,fand,CG4849,CG6674,CG17187
CG18746	FBgn0042103	CG18746	FC6272	11	0.567	0.0209	Predicted	nuclear mRNA splicing, via spliceosome	NetworkBlast	Predicted from PPI network	Human & Fly	CG8264,CG6905,CG2807,CG13900,CG3780,CG3193,CG11266,CG9998,CG13298,CG42724,CG3605	FBgn0004856,FBgn0035136,FBgn0031266,FBgn0035162,FBgn0015818,FBgn0000377,FBgn0031883,FBgn0005411,FBgn0035692,FBgn0261641,FBgn0031493	Bx42,FBgn0035136,Sf3b1,Sf3b3,Spx,crn,Caper,U2af50,Sf3b6,CG42724,Sf3b2
CG18746	FBgn0042103	CG18746	FC6242	15	0.627	0.00354	Predicted	neurogenesis	NetworkBlast	Predicted from PPI network	Fly & Yeast	CG5589,CG2048,CG13849,CG7275,CG7246,CG2260,CG4866,CG12325,CG4258,CG3436,CG13097,CG1430,CG33505,CG9799,CG11188	FBgn0036754,FBgn0002413,FBgn0038964,FBgn0036500,FBgn0030081,FBgn0030000,FBgn0034232,FBgn0033557,FBgn0020305,FBgn0031229,FBgn0032051,FBgn0010292,FBgn0053505,FBgn0038146,FBgn0031851	CG5589,dco,Nop56,CG7275,CG7246,CG2260,CG4866,CG12325,dbe,CG3436,CG13097,bys,U3-55K,CG9799,Aatf
CG18746	FBgn0042103	CG18746	FC5411	11	0.707	0.00122	Predicted	nuclear mRNA splicing, via spliceosome	CFinder	Predicted from PPI network	Fly	CG8264,CG6015,CG4528,CG15084,CG9667,CG8877,CG3193,CG6197,CG3436,CG4849,CG17187	FBgn0004856,FBgn0038927,FBgn0003449,FBgn0034402,FBgn0037550,FBgn0033688,FBgn0000377,FBgn0033859,FBgn0031229,FBgn0039566,FBgn0037882	Bx42,CG6015,snf,CG15084,CG9667,Prp8,crn,fand,CG3436,CG4849,CG17187
CG18746	FBgn0042103	CG18746	FC4161	7	0.798	0.00125	Predicted	nuclear mRNA splicing, via spliceosome	CFinder	Predicted from PPI network	Fly	CG3193,CG8264,CG6015,CG6197,CG4849,CG9667,CG8877	FBgn0000377,FBgn0004856,FBgn0038927,FBgn0033859,FBgn0039566,FBgn0037550,FBgn0033688	crn,Bx42,CG6015,fand,CG4849,CG9667,Prp8
CG18746	FBgn0042103	CG18746	FC1941	6	0.862	0.000891	Literature	UTP B complex	Affinity Capture-MS	CYC2008	Yeast	CG1671,CG7989,CG8064,CG7246,CG9799,CG12325	FBgn0033454,FBgn0022070,FBgn0038597,FBgn0030081,FBgn0038146,FBgn0033557	CG1671,FBgn0022070,CG8064,CG7246,CG9799,CG12325
CG18746	FBgn0042103	CG18746	FC1778	3	0.98	0.0281	Literature	putative complex without known function	Predicted by MS data (cluster was obtained from literature)	Additional publication	Fly	CG12012,CG4822,CG32177	FBgn0035444,FBgn0031220,FBgn0052177	CG12012,CG4822,Ndfip
CG18746	FBgn0042103	CG18746	FC5328	4	0.985	0.00339	Predicted	rRNA processing	NetworkBlast	Predicted from PPI network	Human & Fly	CG1671,CG8064,CG12653,CG9799	FBgn0033454,FBgn0038597,FBgn0000233,FBgn0038146	CG1671,CG8064,btd,CG9799
CG18746	FBgn0042103	CG18746	FC2176	6	0.998	5.85e-05	Literature	Prp19-associated complex	Two-hybrid,Affinity Capture-Western	CYC2008	Yeast	CG3193,CG12343,CG6197,CG5519,CG6905,CG9667	FBgn0000377,FBgn0033556,FBgn0033859,FBgn0261119,FBgn0035136,FBgn0037550	crn,CG12343,fand,Prp19,FBgn0035136,CG9667
CG18746	FBgn0042103	CG18746	FC1091	3	1	0.0247	Literature	nuclear mRNA splicing, via spliceosome	Predicted by MS data (cluster was obtained from literature)	Additional publication	Fly	CG1796,CG6905,CG4980	FBgn0030365,FBgn0035136,FBgn0039558	Tango4,FBgn0035136,BCAS2
CG18745	FBgn0042102	CG18745	FC847	3	1	0.00668	Literature	intracellular protein transport;protein transport;intracellular transport;establishment of protein localization;cellular protein localization	Predicted by HT data (cluster was obtained from CYC2008)	CYC2008	Yeast	CG32165,CG9638,CG32164	FBgn0042178,FBgn0037555,FBgn0042177	CG32165,Ada2b,CG32164
CG1105	FBgn0037465	CG1105	FC1778	3	0.98	0.0309	Literature	putative complex without known function	Predicted by MS data (cluster was obtained from literature)	Additional publication	Fly	CG12012,CG4822,CG32177	FBgn0035444,FBgn0031220,FBgn0052177	CG12012,CG4822,Ndfip
CG1105	FBgn0037465	CG1105	FC847	3	1	0.0274	Literature	intracellular protein transport	Predicted by HT data (cluster was obtained from CYC2008)	CYC2008	Yeast	CG32165,CG9638,CG32164	FBgn0042178,FBgn0037555,FBgn0042177	CG32165,Ada2b,CG32164
CG14696	FBgn0037853	CG14696	FC847	3	1	0.0107	Literature	intracellular protein transport;protein transport;intracellular transport;establishment of protein localization;cellular protein localization	Predicted by HT data (cluster was obtained from CYC2008)	CYC2008	Yeast	CG32165,CG9638,CG32164	FBgn0042178,FBgn0037555,FBgn0042177	CG32165,Ada2b,CG32164
CG4674	FBgn0037856	Leash	FC6272	11	0.716	0.012	Predicted	nuclear mRNA splicing, via spliceosome	NetworkBlast	Predicted from PPI network	Human & Fly	CG8264,CG6905,CG2807,CG13900,CG3780,CG3193,CG11266,CG9998,CG13298,CG42724,CG3605	FBgn0004856,FBgn0035136,FBgn0031266,FBgn0035162,FBgn0015818,FBgn0000377,FBgn0031883,FBgn0005411,FBgn0035692,FBgn0261641,FBgn0031493	Bx42,FBgn0035136,Sf3b1,Sf3b3,Spx,crn,Caper,U2af50,Sf3b6,CG42724,Sf3b2
CG4674	FBgn0037856	Leash	FC437	7	0.792	0.00998	Literature	FBP degradation complex	Affinity Capture-MS	CYC2008	Yeast	CG6617,CG9144,CG3295,CG18467,CG31357,CG42236,CG7611	FBgn0030944,FBgn0031773,FBgn0034573,FBgn0034218,FBgn0051357,FBgn0262114,FBgn0037094	CG6617,Fbw5,CG3295,CG18467,CG31357,RanBPM,CG7611
CG4674	FBgn0037856	Leash	FC4161	7	0.8	0.00891	Predicted	nuclear mRNA splicing, via spliceosome	CFinder	Predicted from PPI network	Fly	CG3193,CG8264,CG6015,CG6197,CG4849,CG9667,CG8877	FBgn0000377,FBgn0004856,FBgn0038927,FBgn0033859,FBgn0039566,FBgn0037550,FBgn0033688	crn,Bx42,CG6015,fand,CG4849,CG9667,Prp8
CG4674	FBgn0037856	Leash	FC3031	4	0.98	0.0148	Literature	CTLH complex	MI:0019- coimmunoprecipitation	CORUM	Human	CG8811,CG3295,CG31357,CG42236	FBgn0033757,FBgn0034573,FBgn0051357,FBgn0262114	muskelin,CG3295,CG31357,RanBPM
CG4674	FBgn0037856	Leash	FC3572	6	0.99	0.00163	Predicted	biological_process	NetworkBlast	Predicted from PPI network	Fly & Yeast	CG6617,CG3295,CG31357,CG42236,CG1989,CG7611	FBgn0030944,FBgn0034573,FBgn0051357,FBgn0262114,FBgn0026749,FBgn0037094	CG6617,CG3295,CG31357,RanBPM,Yippee,CG7611
CG4674	FBgn0037856	Leash	FC2176	6	1	0.0014	Literature	Prp19-associated complex	Two-hybrid,Affinity Capture-Western	CYC2008	Yeast	CG3193,CG12343,CG6197,CG5519,CG6905,CG9667	FBgn0000377,FBgn0033556,FBgn0033859,FBgn0261119,FBgn0035136,FBgn0037550	crn,CG12343,fand,Prp19,FBgn0035136,CG9667
CG10086	FBgn0037517	CG10086	FC2176	6	0.98	0.03	Literature	Prp19-associated complex	Two-hybrid,Affinity Capture-Western	CYC2008	Yeast	CG3193,CG12343,CG6197,CG5519,CG6905,CG9667	FBgn0000377,FBgn0033556,FBgn0033859,FBgn0261119,FBgn0035136,FBgn0037550	crn,CG12343,fand,Prp19,FBgn0035136,CG9667
CG7047	FBgn0035103	Vdup1	FC4173	15	0.466	0.0307	Predicted	RNA processing	NetworkBlast	Predicted from PPI network	Fly & Yeast	CG7028,CG32344,CG2173,CG6375,CG7845,CG3983,CG8545,CG8801,CG30115,CG3594,CG11266,CG5317,CG8939,CG5033,CG11107	FBgn0027587,FBgn0052344,FBgn0021995,FBgn0025140,FBgn0033059,FBgn0038473,FBgn0033741,FBgn0028473,FBgn0050115,FBgn0035063,FBgn0031883,FBgn0032404,FBgn0030720,FBgn0028744,FBgn0033160	CG7028,CG32344,Rs1,FBgn0025140,FBgn0033059,Ns1,CG8545,Non1,GEFmeso,CG3594,Caper,RpL7-like,CG8939,CG5033,Dhx15
CG7047	FBgn0035103	Vdup1	FC6272	11	0.543	0.0148	Predicted	nuclear mRNA splicing, via spliceosome	NetworkBlast	Predicted from PPI network	Human & Fly	CG8264,CG6905,CG2807,CG13900,CG3780,CG3193,CG11266,CG9998,CG13298,CG42724,CG3605	FBgn0004856,FBgn0035136,FBgn0031266,FBgn0035162,FBgn0015818,FBgn0000377,FBgn0031883,FBgn0005411,FBgn0035692,FBgn0261641,FBgn0031493	Bx42,FBgn0035136,Sf3b1,Sf3b3,Spx,crn,Caper,U2af50,Sf3b6,CG42724,Sf3b2
CG7047	FBgn0035103	Vdup1	FC4161	7	0.642	0.00679	Predicted	nuclear mRNA splicing, via spliceosome	CFinder	Predicted from PPI network	Fly	CG3193,CG8264,CG6015,CG6197,CG4849,CG9667,CG8877	FBgn0000377,FBgn0004856,FBgn0038927,FBgn0033859,FBgn0039566,FBgn0037550,FBgn0033688	crn,Bx42,CG6015,fand,CG4849,CG9667,Prp8
CG7047	FBgn0035103	Vdup1	FC2176	6	0.808	0.00158	Literature	Prp19-associated complex	Two-hybrid,Affinity Capture-Western	CYC2008	Yeast	CG3193,CG12343,CG6197,CG5519,CG6905,CG9667	FBgn0000377,FBgn0033556,FBgn0033859,FBgn0261119,FBgn0035136,FBgn0037550	crn,CG12343,fand,Prp19,FBgn0035136,CG9667
CG2641	FBgn0037518	CG2641	FC847	3	0.94	0.00772	Literature	intracellular protein transport	Predicted by HT data (cluster was obtained from CYC2008)	CYC2008	Yeast	CG32165,CG9638,CG32164	FBgn0042178,FBgn0037555,FBgn0042177	CG32165,Ada2b,CG32164
CG2641	FBgn0037518	CG2641	FC2316	3	0.96	0.00646	Literature	nuclear mRNA splicing, via spliceosome	Predicted by HT data (cluster was obtained from CYC2008)	CYC2008	Yeast	CG4901,CG32533,CG8494	FBgn0032194,FBgn0052533,FBgn0033916	CG4901,CG32533,Usp20-33

## Sheet: D. Fly DAVID GO (CC)
Baits (Annotation ID)	Category	Term	Count	%	PValue	Preys (Annotataion IDs)	Preys (Flybase ID)	Preys (Symbols)	List Total	Pop Hits	Pop Total	Fold Enrichment	Bonferroni	Benjamini	FDR
CG18746	GOTERM_CC_DIRECT	GO:0071013~catalytic step 2 spliceosome	35	30.1724	1.93484e-40	CG8383,CG12135,CG3605,CG1866,CG4886,CG4849,CG31368,CG12750,CG14637,CG10473,CG6015,CG5931,CG3193,CG1474,CG8877,CG4980,CG6197,CG6905,CG7028,CG6841,CG11274,CG16941,CG2807,CG5808,CG6066,CG2925,CG11107,CG8833,CG7483,CG1677,CG3225,CG13892,CG3436,CG9667,CG14641	FBGN0037737, FBGN0040235, FBGN0031493, FBGN0039581, FBGN0028382, FBGN0039566, FBGN0051368, FBGN0086707, FBGN0015331, FBGN0263198, FBGN0038927, FBGN0263599, FBGN0000377, FBGN0023506, FBGN0033688, FBGN0039558, FBGN0033859, FBGN0265574, FBGN0027587, FBGN0036828, FBGN0036340, FBGN0266917, FBGN0031266, FBGN0027617, FBGN0039488, FBGN0014366, FBGN0033160, FBGN0036386, FBGN0037573, FBGN0029941, FBGN00316…	Pnn,c12.1,Sf3b2,Moca-cyp,cyp33,CG4849,CG31368,ncm,abs,Acn,CG6015,l(3)72Ab,crn,Es2,Prp8,BCAS2,fand,Cdc5,CG7028,CG6841,SRm160,Sf3a1,Sf3b1,CG5808,CG6066,noi,Dhx15,CG8833,CG7483,CG1677,CG3225,Cypl,CG3436,CG9667,CG14641	101	130	10026	26.7258	1.89614e-38	1.89614e-38	2.13937e-37
CG18746	GOTERM_CC_DIRECT	GO:0071011~precatalytic spliceosome	32	27.5862	2.86687e-33	CG8383,CG12135,CG3605,CG1866,CG4886,CG4849,CG31368,CG14637,CG10473,CG6015,CG5931,CG3193,CG8877,CG4980,CG6197,CG6905,CG7028,CG6841,CG16941,CG2807,CG11274,CG5808,CG2925,CG11107,CG8833,CG7483,CG1677,CG13892,CG3225,CG3436,CG9667,CG14641	FBGN0037737, FBGN0040235, FBGN0031493, FBGN0039581, FBGN0028382, FBGN0039566, FBGN0051368, FBGN0015331, FBGN0263198, FBGN0038927, FBGN0263599, FBGN0000377, FBGN0033688, FBGN0039558, FBGN0033859, FBGN0265574, FBGN0027587, FBGN0036828, FBGN0266917, FBGN0031266, FBGN0036340, FBGN0027617, FBGN0014366, FBGN0033160, FBGN0036386, FBGN0037573, FBGN0029941, FBGN0035141, FBGN0031631, FBGN0031229, FBGN00375…	Pnn,c12.1,Sf3b2,Moca-cyp,cyp33,CG4849,CG31368,abs,Acn,CG6015,l(3)72Ab,crn,Prp8,BCAS2,fand,Cdc5,CG7028,CG6841,Sf3a1,Sf3b1,SRm160,CG5808,noi,Dhx15,CG8833,CG7483,CG1677,Cypl,CG3225,CG3436,CG9667,CG14641	101	150	10026	21.177	2.80953e-31	1.40476e-31	3.16992e-30
CG18746	GOTERM_CC_DIRECT	GO:0005730~nucleolus	21	18.1034	1.95812e-16	CG32708,CG1685,CG5824,CG9680,CG7993,CG12785,CG5728,CG4202,CG11130,CG6375,CG1994,CG11583,CG8939,CG10206,CG3983,CG6146,CG8545,CG4554,CG9004,CG2875,CG6501	FBGN0052708, FBGN0015527, FBGN0010926, FBGN0004556, FBGN0038585, FBGN0261286, FBGN0039182, FBGN0029755, FBGN0020909, FBGN0266581, FBGN0027330, FBGN0035524, FBGN0030720, FBGN0026196, FBGN0038473, FBGN0004924, FBGN0033741, FBGN0034734, FBGN0035336, FBGN0029672, FBGN0034243	CG32708,peng,l(3)07882,Dbp73D,Non3,Mat89Ba,CG5728,Sas10,Rtc1,pit,l(1)G0020,CG11583,CG8939,nop5,Ns1,Top1,CG8545,CG4554,CG9004,CG2875,Ns2	101	170	10026	12.2624	2.17604e-14	7.21645e-15	2.44249e-13
CG18746	GOTERM_CC_DIRECT	GO:0000974~Prp19 complex	8	6.89655	6.03656e-12	CG4980,CG4886,CG6197,CG3193,CG6905,CG31368,CG9667,CG14641	FBGN0039558, FBGN0028382, FBGN0033859, FBGN0000377, FBGN0265574, FBGN0051368, FBGN0037550, FBGN0037220	BCAS2,cyp33,fand,crn,Cdc5,CG31368,CG9667,CG14641	101	12	10026	66.1782	5.91588e-10	1.47897e-10	6.67475e-09
CG18746	GOTERM_CC_DIRECT	GO:0032040~small-subunit processome	10	8.62069	2.14327e-11	CG4202,CG5824,CG13849,CG10805,CG12785,CG10206,CG4554,CG7246,CG2875,CG5728	FBGN0029755, FBGN0010926, FBGN0038964, FBGN0086451, FBGN0261286, FBGN0026196, FBGN0034734, FBGN0030081, FBGN0029672, FBGN0039182	Sas10,l(3)07882,Nop56,l(2)k09022,Mat89Ba,nop5,CG4554,CG7246,CG2875,CG5728	101	33	10026	30.081	2.1004e-09	4.2008e-10	2.36983e-08
CG18746	GOTERM_CC_DIRECT	GO:0044545~NSL complex	6	5.17241	1.84514e-09	CG1135,CG10042,CG18041,CG4699,CG8233,CG3025	FBGN0263832, FBGN0038016, FBGN0039710, FBGN0262527, FBGN0033897, FBGN0014340	Rcd5,MBD-R2,dgt1,nsl1,Rcd1,mof	101	7	10026	85.0863	1.80824e-07	3.01373e-08	2.04019e-06
CG18746	GOTERM_CC_DIRECT	GO:0005634~nucleus	38	32.7586	6.99136e-06	CG1135,CG4268,CG12135,CG3231,CG32575,CG1866,CG13472,CG18041,CG9776,CG7490,CG2691,CG10473,CG10354,CG10042,CG8939,CG6146,CG5931,CG12396,CG5720,CG3193,CG1474,CG31671,CG10360,CG6843,CG7704,CG4699,CG6197,CG9300,CG8233,CG5728,CG6905,CG3025,CG6841,CG16941,CG11274,CG2031,CG7483,CG14641	FBGN0263832, FBGN0016696, FBGN0040235, FBGN0086129, FBGN0026575, FBGN0039581, FBGN0036450, FBGN0039710, FBGN0027866, FBGN0000100, FBGN0030504, FBGN0263198, FBGN0031868, FBGN0038016, FBGN0030720, FBGN0004924, FBGN0263599, FBGN0022069, FBGN0028471, FBGN0000377, FBGN0023506, FBGN0031390, FBGN0003231, FBGN0036827, FBGN0010356, FBGN0262527, FBGN0033859, FBGN0036886, FBGN0033897, FBGN0039182, FBGN02655…	Rcd5,Pitslre,c12.1,snama,hang,Moca-cyp,Tdrd3,dgt1,CG9776,RpLP0,CG2691,Acn,Rat1,MBD-R2,CG8939,Top1,l(3)72Ab,Nnp-1,Nab2,crn,Es2,tho2,ref(2)P,CG6843,Taf5,nsl1,fand,CG9300,Rcd1,CG5728,Cdc5,mof,CG6841,Sf3a1,SRm160,Hpr1,CG7483,CG14641	101	1832	10026	2.05904	0.000684921	9.78745e-05	0.00773014
CG18746	GOTERM_CC_DIRECT	GO:0071012~catalytic step 1 spliceosome	4	3.44828	9.49034e-06	CG4980,CG6197,CG3193,CG9667	FBGN0039558, FBGN0033859, FBGN0000377, FBGN0037550	BCAS2,fand,crn,CG9667	101	5	10026	79.4139	0.000929626	0.000116251	0.0104931
CG18746	GOTERM_CC_DIRECT	GO:0005681~spliceosomal complex	6	5.17241	0.000108799	CG11107,CG6015,CG5931,CG3193,CG6905,CG12750	FBGN0033160, FBGN0038927, FBGN0263599, FBGN0000377, FBGN0265574, FBGN0086707	Dhx15,CG6015,l(3)72Ab,crn,Cdc5,ncm	101	48	10026	12.4084	0.0106063	0.00118407	0.120235
CG18746	GOTERM_CC_DIRECT	GO:0030687~preribosome, large subunit precursor	5	4.31034	0.000117683	CG4918,CG8939,CG12396,CG32075,CG7490	FBGN0003274, FBGN0030720, FBGN0022069, FBGN0052075, FBGN0000100	RpLP2,CG8939,Nnp-1,CG32075,RpLP0	101	26	10026	19.0899	0.0114673	0.00115269	0.130046
CG18746	GOTERM_CC_DIRECT	GO:0030532~small nuclear ribonucleoprotein complex	5	4.31034	0.000384766	CG8877,CG5931,CG4849,CG3436,CG6841	FBGN0033688, FBGN0263599, FBGN0039566, FBGN0031229, FBGN0036828	Prp8,l(3)72Ab,CG4849,CG3436,CG6841	101	35	10026	14.181	0.037012	0.00342271	0.424618
CG18746	GOTERM_CC_DIRECT	GO:0071014~post-mRNA release spliceosomal complex	3	2.58621	0.000583306	CG6197,CG3193,CG9667	FBGN0033859, FBGN0000377, FBGN0037550	fand,crn,CG9667	101	4	10026	74.4505	0.0555766	0.00475372	0.64308
CG18746	GOTERM_CC_DIRECT	GO:0005686~U2 snRNP	4	3.44828	0.00291439	CG3605,CG2925,CG16941,CG2807	FBGN0031493, FBGN0014366, FBGN0266917, FBGN0031266	Sf3b2,noi,Sf3a1,Sf3b1	101	29	10026	13.692	0.248758	0.0217618	3.17566
CG1105	GOTERM_CC_DIRECT	GO:0000145~exocyst	4	6.66667	8.58034e-06	CG2095,CG3885,CG8843,CG6095	FBGN0266672, FBGN0266669, FBGN0266670, FBGN0266668	Sec8,Sec3,Sec5,Exo84	56	8	10026	89.5179	0.000746214	0.000746214	0.00927289
CG1105	GOTERM_CC_DIRECT	GO:0031965~nuclear membrane	5	8.33333	3.32658e-05	CG1059,CG13387,CG7398,CG32165,CG32164	FBGN0087013, FBGN0020497, FBGN0024921, FBGN0042178, FBGN0042177	Karybeta3,emb,Tnpo,CG32165,CG32164	56	34	10026	26.3288	0.00288999	0.00144604	0.0359464
CG1105	GOTERM_CC_DIRECT	GO:0005737~cytoplasm	22	36.6667	3.51839e-05	CG17753,CG13387,CG7935,CG42616,CG1945,CG7398,CG11198,CG3460,CG5651,CG1569,CG14299,CG34407,CG6668,CG4257,CG15154,CG32165,CG32164,CG2095,CG33554,CG10376,CG8843,CG9674	FBGN0010531, FBGN0020497, FBGN0026252, FBGN0261268, FBGN0005632, FBGN0024921, FBGN0033246, FBGN0023542, FBGN0086706, FBGN0003268, FBGN0038651, FBGN0085436, FBGN0039213, FBGN0016917, FBGN0041184, FBGN0042178, FBGN0042177, FBGN0266672, FBGN0053554, FBGN0032702, FBGN0266670, FBGN0036663	Ccs,emb,msk,Cul3,faf,Tnpo,ACC,Nmd3,pix,rod,Epg5,Not1,atl,Stat92E,Socs36E,CG32165,CG32164,Sec8,Nipped-A,CG10376,Sec5,CG9674	56	1553	10026	2.53624	0.00305638	0.00101983	0.0380188
CG1105	GOTERM_CC_DIRECT	GO:0034399~nuclear periphery	4	6.66667	0.000193732	CG1059,CG7398,CG32165,CG32164	FBGN0087013, FBGN0024921, FBGN0042178, FBGN0042177	Karybeta3,Tnpo,CG32165,CG32164	56	21	10026	34.102	0.016715	0.00420521	0.209179
CG7047	GOTERM_CC_DIRECT	GO:0071013~catalytic step 2 spliceosome	20	28.9855	3.17375e-22	CG8383,CG8877,CG3605,CG6197,CG4849,CG7035,CG6905,CG7028,CG12750,CG31368,CG2807,CG14637,CG7843,CG6066,CG11107,CG5931,CG7483,CG3193,CG1677,CG14641	FBGN0037737, FBGN0033688, FBGN0031493, FBGN0033859, FBGN0039566, FBGN0022942, FBGN0265574, FBGN0027587, FBGN0086707, FBGN0051368, FBGN0031266, FBGN0015331, FBGN0033062, FBGN0039488, FBGN0033160, FBGN0263599, FBGN0037573, FBGN0000377, FBGN0029941, FBGN0037220	Pnn,Prp8,Sf3b2,fand,CG4849,Cbp80,Cdc5,CG7028,ncm,CG31368,Sf3b1,abs,Ars2,CG6066,Dhx15,l(3)72Ab,CG7483,crn,CG1677,CG14641	60	130	10026	25.7077	2.72942e-20	2.72942e-20	3.42235e-19
CG7047	GOTERM_CC_DIRECT	GO:0071011~precatalytic spliceosome	19	27.5362	1.85802e-19	CG8383,CG8877,CG3605,CG17838,CG6197,CG4849,CG7035,CG6905,CG7028,CG31368,CG2807,CG14637,CG7843,CG11107,CG5931,CG7483,CG3193,CG1677,CG14641	FBGN0037737, FBGN0033688, FBGN0031493, FBGN0038826, FBGN0033859, FBGN0039566, FBGN0022942, FBGN0265574, FBGN0027587, FBGN0051368, FBGN0031266, FBGN0015331, FBGN0033062, FBGN0033160, FBGN0263599, FBGN0037573, FBGN0000377, FBGN0029941, FBGN0037220	Pnn,Prp8,Sf3b2,Syp,fand,CG4849,Cbp80,Cdc5,CG7028,CG31368,Sf3b1,abs,Ars2,Dhx15,l(3)72Ab,CG7483,crn,CG1677,CG14641	60	150	10026	21.166	1.59789e-17	7.98947e-18	2.00356e-16
CG7047	GOTERM_CC_DIRECT	GO:0005634~nucleus	29	42.029	2.69548e-07	CG8384,CG8184,CG17838,CG9776,CG7490,CG5965,CG2691,CG18361,CG32685,CG12359,CG8939,CG5931,CG12396,CG3193,CG8414,CG31671,CG10341,CG8092,CG11680,CG7831,CG6197,CG7035,CG6905,CG5728,CG2031,CG1800,CG7483,CG6842,CG14641	FBGN0001139, FBGN0030674, FBGN0038826, FBGN0027866, FBGN0000100, FBGN0010328, FBGN0030504, FBGN0000499, FBGN0052685, FBGN0027603, FBGN0030720, FBGN0263599, FBGN0022069, FBGN0000377, FBGN0034073, FBGN0031390, FBGN0032701, FBGN0033998, FBGN0002774, FBGN0002924, FBGN0033859, FBGN0022942, FBGN0265574, FBGN0039182, FBGN0037382, FBGN0039861, FBGN0037573, FBGN0283469, FBGN0037220	gro,CG8184,Syp,CG9776,RpLP0,woc,CG2691,dsh,ZAP3,Ulp1,CG8939,l(3)72Ab,Nnp-1,crn,CG8414,tho2,CG10341,row,mle,ncd,fand,Cbp80,Cdc5,CG5728,Hpr1,pasha,CG7483,Vps4,CG14641	60	1832	10026	2.64514	2.31809e-05	7.72702e-06	0.000290662
CG7047	GOTERM_CC_DIRECT	GO:0000974~Prp19 complex	5	7.24638	5.16911e-07	CG6197,CG3193,CG6905,CG31368,CG14641	FBGN0033859, FBGN0000377, FBGN0265574, FBGN0051368, FBGN0037220	fand,crn,Cdc5,CG31368,CG14641	60	12	10026	69.625	4.44533e-05	1.11135e-05	0.000557399
CG7047	GOTERM_CC_DIRECT	GO:0005730~nucleolus	9	13.0435	6.15414e-06	CG4202,CG1685,CG11130,CG7993,CG11583,CG8939,CG8414,CG5728,CG6501	FBGN0029755, FBGN0015527, FBGN0020909, FBGN0038585, FBGN0035524, FBGN0030720, FBGN0034073, FBGN0039182, FBGN0034243	Sas10,peng,Rtc1,Non3,CG11583,CG8939,CG8414,CG5728,Ns2	60	170	10026	8.84647	0.000529117	0.000105846	0.00663599
CG7047	GOTERM_CC_DIRECT	GO:0005681~spliceosomal complex	5	7.24638	0.0001735	CG11107,CG5931,CG3193,CG6905,CG12750	FBGN0033160, FBGN0263599, FBGN0000377, FBGN0265574, FBGN0086707	Dhx15,l(3)72Ab,crn,Cdc5,ncm	60	48	10026	17.4062	0.0148115	0.00248396	0.186932
CG7047	GOTERM_CC_DIRECT	GO:0030687~preribosome, large subunit precursor	4	5.7971	0.000457114	CG4918,CG8939,CG12396,CG7490	FBGN0003274, FBGN0030720, FBGN0022069, FBGN0000100	RpLP2,CG8939,Nnp-1,RpLP0	60	26	10026	25.7077	0.0385578	0.00560151	0.491819
CG4674	GOTERM_CC_DIRECT	GO:0071013~catalytic step 2 spliceosome	40	20.4082	5.84655e-39	CG8383,CG12135,CG3605,CG9401,CG6322,CG18005,CG4886,CG4849,CG31368,CG12750,CG8241,CG10473,CG5451,CG6015,CG5931,CG3193,CG12343,CG3613,CG8877,CG4980,CG6197,CG7035,CG6137,CG6905,CG6841,CG16941,CG2807,CG6066,CG7843,CG2925,CG11107,CG8833,CG1796,CG7483,CG1677,CG13892,CG3436,CG1406,CG9667,CG14641	FBGN0037737, FBGN0040235, FBGN0031493, FBGN0002736, FBGN0036733, FBGN0037660, FBGN0028382, FBGN0039566, FBGN0051368, FBGN0086707, FBGN0086895, FBGN0263198, FBGN0038666, FBGN0038927, FBGN0263599, FBGN0000377, FBGN0033556, FBGN0022986, FBGN0033688, FBGN0039558, FBGN0033859, FBGN0022942, FBGN0000146, FBGN0265574, FBGN0036828, FBGN0266917, FBGN0031266, FBGN0039488, FBGN0033062, FBGN0014366, FBGN00331…	Pnn,c12.1,Sf3b2,mago,U4-U6-60K,beag,cyp33,CG4849,CG31368,ncm,pea,Acn,Smu1,CG6015,l(3)72Ab,crn,CG12343,qkr58E-1,Prp8,BCAS2,fand,Cbp80,aub,Cdc5,CG6841,Sf3a1,Sf3b1,CG6066,Ars2,noi,Dhx15,CG8833,Tango4,CG7483,CG1677,Cypl,CG3436,U2A,CG9667,CG14641	171	130	10026	18.0405	1.06407e-36	1.06407e-36	7.21476e-36
CG4674	GOTERM_CC_DIRECT	GO:0071011~precatalytic spliceosome	39	19.898	7.79884e-35	CG8383,CG12135,CG3605,CG9401,CG18005,CG6322,CG4886,CG4849,CG31368,CG8241,CG10473,CG5451,CG6015,CG5931,CG3193,CG12343,CG3613,CG8877,CG4980,CG6197,CG7035,CG6137,CG6905,CG6841,CG16941,CG2807,CG7843,CG2925,CG11107,CG8833,CG1796,CG1622,CG7483,CG1677,CG13892,CG3436,CG1406,CG9667,CG14641	FBGN0037737, FBGN0040235, FBGN0031493, FBGN0002736, FBGN0037660, FBGN0036733, FBGN0028382, FBGN0039566, FBGN0051368, FBGN0086895, FBGN0263198, FBGN0038666, FBGN0038927, FBGN0263599, FBGN0000377, FBGN0033556, FBGN0022986, FBGN0033688, FBGN0039558, FBGN0033859, FBGN0022942, FBGN0000146, FBGN0265574, FBGN0036828, FBGN0266917, FBGN0031266, FBGN0033062, FBGN0014366, FBGN0033160, FBGN0036386, FBGN00303…	Pnn,c12.1,Sf3b2,mago,beag,U4-U6-60K,cyp33,CG4849,CG31368,pea,Acn,Smu1,CG6015,l(3)72Ab,crn,CG12343,qkr58E-1,Prp8,BCAS2,fand,Cbp80,aub,Cdc5,CG6841,Sf3a1,Sf3b1,Ars2,noi,Dhx15,CG8833,Tango4,CG1622,CG7483,CG1677,Cypl,CG3436,U2A,CG9667,CG14641	171	150	10026	15.2442	1.41939e-32	7.09694e-33	9.62393e-32
CG4674	GOTERM_CC_DIRECT	GO:0000502~proteasome complex	15	7.65306	4.80663e-15	CG3431,CG10149,CG4097,CG11888,CG7619,CG12323,CG42641,CG1100,CG8392,CG5266,CG11981,CG3329,CG17331,CG1519,CG3416	FBGN0011327, FBGN0028689, FBGN0002284, FBGN0028692, FBGN0015283, FBGN0029134, FBGN0261396, FBGN0028690, FBGN0010590, FBGN0086134, FBGN0026380, FBGN0023174, FBGN0032596, FBGN0023175, FBGN0002787	Uch-L5,Rpn6,Prosbeta6,Rpn2,Rpn10,Prosbeta5,Rpn3,Rpn5,Prosbeta1,Prosalpha2,Prosbeta3,Prosbeta2,Prosbeta4,Prosalpha7,Rpn8	171	43	10026	20.4529	8.68861e-13	2.89657e-13	5.89528e-12
CG4674	GOTERM_CC_DIRECT	GO:0005838~proteasome regulatory particle	12	6.12245	7.34397e-15	CG10370,CG16916,CG3431,CG3455,CG10149,CG11888,CG7619,CG5289,CG1489,CG1100,CG42641,CG3416	FBGN0028684, FBGN0028686, FBGN0011327, FBGN0028685, FBGN0028689, FBGN0028692, FBGN0015283, FBGN0015282, FBGN0020369, FBGN0028690, FBGN0261396, FBGN0002787	Rpt5,Rpt3,Uch-L5,Rpt4,Rpn6,Rpn2,Rpn10,Rpt2,Rpt6,Rpn5,Rpn3,Rpn8	171	21	10026	33.5038	1.3336e-12	3.334e-13	9.03722e-12
CG4674	GOTERM_CC_DIRECT	GO:0000974~Prp19 complex	10	5.10204	1.97546e-14	CG4980,CG1796,CG4886,CG6197,CG3193,CG12343,CG6905,CG31368,CG9667,CG14641	FBGN0039558, FBGN0030365, FBGN0028382, FBGN0033859, FBGN0000377, FBGN0033556, FBGN0265574, FBGN0051368, FBGN0037550, FBGN0037220	BCAS2,Tango4,cyp33,fand,crn,CG12343,Cdc5,CG31368,CG9667,CG14641	171	12	10026	48.8596	3.59668e-12	7.19313e-13	2.43916e-11
CG4674	GOTERM_CC_DIRECT	GO:0005634~nucleus	69	35.2041	2.0829e-11	CG12135,CG3431,CG8184,CG4097,CG11734,CG1489,CG3508,CG10473,CG2048,CG4943,CG17331,CG5931,CG3193,CG31671,CG13176,CG11290,CG10712,CG3613,CG7392,CG8730,CG2252,CG13316,CG11888,CG6197,CG7035,CG6315,CG6905,CG5266,CG16941,CG6875,CG6292,CG2031,CG1800,CG3329,CG1519,CG4005,CG42236,CG4268,CG13425,CG3455,CG9401,CG18005,CG2028,CG4244,CG7619,CG9776,CG8241,CG5179,CG5451,CG3496,CG42797,CG6146,CG3733,CG42279,CG423…	FBGN0040235, FBGN0011327, FBGN0030674, FBGN0002284, FBGN0031107, FBGN0020369, FBGN0038251, FBGN0263198, FBGN0002413, FBGN0029006, FBGN0032596, FBGN0263599, FBGN0000377, FBGN0031390, FBGN0033692, FBGN0034975, FBGN0044324, FBGN0022986, FBGN0044323, FBGN0026722, FBGN0004656, FBGN0023215, FBGN0028692, FBGN0033859, FBGN0022942, FBGN0000662, FBGN0265574, FBGN0086134, FBGN0266917, FBGN0000140, FBGN00254…	c12.1,Uch-L5,CG8184,Prosbeta6,HERC2,Rpt6,Hexim,Acn,dco,Smurf,Prosbeta4,l(3)72Ab,crn,tho2,wash,enok,Chro,qkr58E-1,Cka,drosha,fs(1)h,Mnt,Rpn2,fand,Cbp80,fl(2)d,Cdc5,Prosalpha2,Sf3a1,asp,CycT,Hpr1,pasha,Prosbeta2,Prosalpha7,yki,RanBPM,Pitslre,HnRNP-K,Rpt4,mago,beag,CkIalpha,Su(dx),Rpn10,CG9776,pea,Cdk9,Smu1,vir,CG42797,Top1,Chd1,Nedd4,Doa,sktl,CG31357,mle,CkIIalpha,mrn,Topors,Prosbeta1,CG6841,Su(Tpl…	171	1832	10026	2.20829	3.79088e-09	6.31813e-10	2.57034e-08
CG4674	GOTERM_CC_DIRECT	GO:0005737~cytoplasm	62	31.6327	3.86368e-11	CG3431,CG8184,CG12306,CG4097,CG11734,CG1489,CG3508,CG10719,CG10473,CG34407,CG2048,CG4943,CG17331,CG3193,CG33967,CG3312,CG13176,CG14228,CG8877,CG7392,CG6137,CG1100,CG5266,CG6875,CG11107,CG3329,CG32165,CG32164,CG1519,CG33193,CG4005,CG42236,CG10370,CG1708,CG13425,CG16916,CG3455,CG9401,CG2028,CG3400,CG4244,CG7619,CG4849,CG5289,CG11198,CG8241,CG4931,CG5451,CG42797,CG6146,CG42279,CG42320,CG31357,CG1168…	FBGN0011327, FBGN0030674, FBGN0003124, FBGN0002284, FBGN0031107, FBGN0020369, FBGN0038251, FBGN0010300, FBGN0263198, FBGN0085436, FBGN0002413, FBGN0029006, FBGN0032596, FBGN0000377, FBGN0262127, FBGN0014024, FBGN0033692, FBGN0086384, FBGN0033688, FBGN0044323, FBGN0000146, FBGN0028690, FBGN0086134, FBGN0000140, FBGN0033160, FBGN0023174, FBGN0042178, FBGN0042177, FBGN0023175, FBGN0053193, FBGN00349…	Uch-L5,CG8184,polo,Prosbeta6,HERC2,Rpt6,Hexim,brat,Acn,Not1,dco,Smurf,Prosbeta4,crn,kibra,Rnp4F,wash,Mer,Prp8,Cka,aub,Rpn5,Prosalpha2,asp,Dhx15,Prosbeta2,CG32165,CG32164,Prosalpha7,sav,yki,RanBPM,Rpt5,cos,HnRNP-K,Rpt3,Rpt4,mago,CkIalpha,Pfrx,Su(dx),Rpn10,CG4849,Rpt2,ACC,pea,Sra-1,Smu1,CG42797,Top1,Nedd4,Doa,CG31357,mle,hpo,faf,CkIIalpha,shot,Prosbeta1,Prosbeta3,CG7611,TrpRS-m	171	1553	10026	2.34073	7.03191e-09	1.00456e-09	4.76787e-08
CG4674	GOTERM_CC_DIRECT	GO:0005839~proteasome core complex	8	4.08163	6.00427e-09	CG11981,CG3329,CG4097,CG17331,CG1519,CG12323,CG8392,CG5266	FBGN0026380, FBGN0023174, FBGN0002284, FBGN0032596, FBGN0023175, FBGN0029134, FBGN0010590, FBGN0086134	Prosbeta3,Prosbeta2,Prosbeta6,Prosbeta4,Prosalpha7,Prosbeta5,Prosbeta1,Prosalpha2	171	17	10026	27.5913	1.09278e-06	1.36597e-07	7.4094e-06
CG4674	GOTERM_CC_DIRECT	GO:0008540~proteasome regulatory particle, base subcomplex	7	3.57143	5.83904e-08	CG10370,CG16916,CG3455,CG11888,CG7619,CG5289,CG1489	FBGN0028684, FBGN0028686, FBGN0028685, FBGN0028692, FBGN0015283, FBGN0015282, FBGN0020369	Rpt5,Rpt3,Rpt4,Rpn2,Rpn10,Rpt2,Rpt6	171	14	10026	29.3158	1.0627e-05	1.18078e-06	7.2055e-05
CG4674	GOTERM_CC_DIRECT	GO:0031595~nuclear proteasome complex	6	3.06122	3.10944e-07	CG10370,CG16916,CG3455,CG5289,CG1489,CG1100	FBGN0028684, FBGN0028686, FBGN0028685, FBGN0015282, FBGN0020369, FBGN0028690	Rpt5,Rpt3,Rpt4,Rpt2,Rpt6,Rpn5	171	10	10026	35.1789	5.65902e-05	5.65917e-06	0.000383711
CG4674	GOTERM_CC_DIRECT	GO:0071012~catalytic step 1 spliceosome	5	2.55102	3.9381e-07	CG4980,CG6197,CG3193,CG12343,CG9667	FBGN0039558, FBGN0033859, FBGN0000377, FBGN0033556, FBGN0037550	BCAS2,fand,crn,CG12343,CG9667	171	5	10026	58.6316	7.1671e-05	6.51575e-06	0.000485969
CG4674	GOTERM_CC_DIRECT	GO:0071203~WASH complex	5	2.55102	2.68415e-06	CG16742,CG13957,CG12272,CG13176,CG7429	FBGN0034529, FBGN0030739, FBGN0036571, FBGN0033692, FBGN0031979	FAM21,SWIP,Strumpellin,wash,CCDC53	171	7	10026	41.8797	0.000488397	4.07089e-05	0.00331225
CG4674	GOTERM_CC_DIRECT	GO:0031597~cytosolic proteasome complex	5	2.55102	9.40898e-06	CG10370,CG16916,CG3455,CG5289,CG1489	FBGN0028684, FBGN0028686, FBGN0028685, FBGN0015282, FBGN0020369	Rpt5,Rpt3,Rpt4,Rpt2,Rpt6	171	9	10026	32.5731	0.00171098	0.000131718	0.0116103
CG4674	GOTERM_CC_DIRECT	GO:0005681~spliceosomal complex	8	4.08163	1.45993e-05	CG11107,CG6322,CG6015,CG5931,CG3193,CG6905,CG12750,CG8241	FBGN0033160, FBGN0036733, FBGN0038927, FBGN0263599, FBGN0000377, FBGN0265574, FBGN0086707, FBGN0086895	Dhx15,U4-U6-60K,CG6015,l(3)72Ab,crn,Cdc5,ncm,pea	171	48	10026	9.77193	0.00265357	0.000189774	0.0180144
CG4674	GOTERM_CC_DIRECT	GO:0071014~post-mRNA release spliceosomal complex	4	2.04082	1.8923e-05	CG6197,CG3193,CG12343,CG9667	FBGN0033859, FBGN0000377, FBGN0033556, FBGN0037550	fand,crn,CG12343,CG9667	171	4	10026	58.6316	0.0034381	0.000229575	0.0233489
CG4674	GOTERM_CC_DIRECT	GO:0030532~small nuclear ribonucleoprotein complex	7	3.57143	2.34857e-05	CG8877,CG6322,CG5931,CG4849,CG3436,CG6841,CG1406	FBGN0033688, FBGN0036733, FBGN0263599, FBGN0039566, FBGN0031229, FBGN0036828, FBGN0033210	Prp8,U4-U6-60K,l(3)72Ab,CG4849,CG3436,CG6841,U2A	171	35	10026	11.7263	0.00426532	0.000267117	0.028978
CG4674	GOTERM_CC_DIRECT	GO:0032783~ELL-EAF complex	4	2.04082	0.000251951	CG6292,CG11166,CG5179,CG8817	FBGN0025455, FBGN0033166, FBGN0019949, FBGN0041111	CycT,Eaf,Cdk9,lilli	171	8	10026	29.3158	0.0448251	0.00269406	0.310469
CG4674	GOTERM_CC_DIRECT	GO:0019774~proteasome core complex, beta-subunit complex	4	2.04082	0.000251951	CG11981,CG3329,CG12323,CG8392	FBGN0026380, FBGN0023174, FBGN0029134, FBGN0010590	Prosbeta3,Prosbeta2,Prosbeta5,Prosbeta1	171	8	10026	29.3158	0.0448251	0.00269406	0.310469
CG4674	GOTERM_CC_DIRECT	GO:0005703~polytene chromosome puff	6	3.06122	0.000755249	CG6292,CG5179,CG32217,CG6146,CG3733,CG7597	FBGN0025455, FBGN0019949, FBGN0014037, FBGN0004924, FBGN0250786, FBGN0037093	CycT,Cdk9,Su(Tpl),Top1,Chd1,Cdk12	171	43	10026	8.18115	0.128472	0.00761018	0.928012
CG4674	GOTERM_CC_DIRECT	GO:0008541~proteasome regulatory particle, lid subcomplex	4	2.04082	0.00094149	CG10149,CG1100,CG42641,CG3416	FBGN0028689, FBGN0028690, FBGN0261396, FBGN0002787	Rpn6,Rpn5,Rpn3,Rpn8	171	12	10026	19.5439	0.157542	0.00898215	1.15564
CG4674	GOTERM_CC_DIRECT	GO:0005700~polytene chromosome	11	5.61224	0.000965583	CG10712,CG11680,CG6292,CG40351,CG5179,CG32217,CG6146,CG15104,CG7597,CG9985,CG13400	FBGN0044324, FBGN0002774, FBGN0025455, FBGN0040022, FBGN0019949, FBGN0014037, FBGN0004924, FBGN0267351, FBGN0037093, FBGN0016984, FBGN0027490	Chro,mle,CycT,Set1,Cdk9,Su(Tpl),Top1,Topors,Cdk12,sktl,D12	171	180	10026	3.58304	0.161232	0.00875252	1.18505
CG4674	GOTERM_CC_DIRECT	GO:0005686~U2 snRNP	5	2.55102	0.00136088	CG3605,CG2925,CG1406,CG16941,CG2807	FBGN0031493, FBGN0014366, FBGN0033210, FBGN0266917, FBGN0031266	Sf3b2,noi,U2A,Sf3a1,Sf3b1	171	29	10026	10.1089	0.219522	0.011733	1.66646
CG4674	GOTERM_CC_DIRECT	GO:0030122~AP-2 adaptor complex	3	1.53061	0.00276378	CG7057,CG12532,CG4260	FBGN0263351, FBGN0010380, FBGN0264855	AP-2mu,AP-1-2beta,AP-2alpha	171	5	10026	35.1789	0.395712	0.0226356	3.35763
CG4674	GOTERM_CC_DIRECT	GO:0008023~transcription elongation factor complex	4	2.04082	0.00380056	CG6292,CG11166,CG32217,CG8817	FBGN0025455, FBGN0033166, FBGN0014037, FBGN0041111	CycT,Eaf,Su(Tpl),lilli	171	19	10026	12.3435	0.499936	0.0296819	4.59022
CG4674	GOTERM_CC_DIRECT	GO:0071010~prespliceosome	3	1.53061	0.00409954	CG6197,CG3193,CG12343	FBGN0033859, FBGN0000377, FBGN0033556	fand,crn,CG12343	171	6	10026	29.3158	0.526522	0.0306719	4.94297
CG18748	GOTERM_CC_DIRECT	GO:0005884~actin filament	8	11.4286	1.7481e-10	CG7558,CG7478,CG1106,CG10067,CG9901,CG10083,CG17158,CG5178	FBGN0262716, FBGN0000045, FBGN0010225, FBGN0000044, FBGN0011742, FBGN0036372, FBGN0011570, FBGN0000047	Arp3,Act79B,Gel,Act57B,Arp2,Abp1,cpb,Act88F	62	27	10026	47.914	2.08023e-08	2.08023e-08	2.00366e-07
CG18748	GOTERM_CC_DIRECT	GO:0005938~cell cortex	11	15.7143	2.68778e-10	CG3722,CG7438,CG7595,CG10083,CG3172,CG1539,CG5020,CG5695,CG2671,CG3595,CG9155	FBGN0003391, FBGN0086347, FBGN0000317, FBGN0036372, FBGN0038206, FBGN0082582, FBGN0020503, FBGN0011225, FBGN0002121, FBGN0003514, FBGN0010246	shg,Myo31DF,ck,Abp1,twf,tmod,CLIP-190,jar,l(2)gl,sqh,Myo61F	62	97	10026	18.3382	3.19846e-08	1.59923e-08	3.08072e-07
CG18748	GOTERM_CC_DIRECT	GO:0005885~Arp2/3 protein complex	6	8.57143	3.89527e-10	CG7558,CG9901,CG9881,CG4560,CG10954,CG8978	FBGN0262716, FBGN0011742, FBGN0031437, FBGN0038369, FBGN0032859, FBGN0001961	Arp3,Arp2,Arpc5,Arpc3A,Arpc2,Arpc1	62	8	10026	121.282	4.63537e-08	1.54512e-08	4.46473e-07
CG18748	GOTERM_CC_DIRECT	GO:0005737~cytoplasm	28	40	7.97953e-08	CG7478,CG5604,CG10067,CG43119,CG6522,CG5695,CG3595,CG2671,CG7885,CG5336,CG4560,CG8472,CG5178,CG10360,CG6493,CG7595,CG16932,CG1822,CG2092,CG6137,CG18076,CG1099,CG17158,CG7558,CG4183,CG9901,CG3172,CG1799	FBGN0000045, FBGN0032208, FBGN0000044, FBGN0262579, FBGN0034223, FBGN0011225, FBGN0003514, FBGN0002121, FBGN0026373, FBGN0032409, FBGN0038369, FBGN0000253, FBGN0000047, FBGN0003231, FBGN0034246, FBGN0000317, FBGN0035060, FBGN0014133, FBGN0261385, FBGN0000146, FBGN0013733, FBGN0023388, FBGN0011570, FBGN0262716, FBGN0001225, FBGN0011742, FBGN0038206, FBGN0003204	Act79B,Ufd4,Act57B,Ect4,Tes,jar,sqh,l(2)gl,RpII33,Ced-12,Arpc3A,Cam,Act88F,ref(2)P,Dcr-2,ck,Eps-15,bif,scra,aub,shot,Dap160,cpb,Arp3,Hsp26,Arp2,twf,ras	62	1553	10026	2.91556	9.4956e-06	2.37391e-06	9.14608e-05
CG18748	GOTERM_CC_DIRECT	GO:0005875~microtubule associated complex	12	17.1429	1.57939e-06	CG4183,CG1915,CG10067,CG10540,CG5436,CG5020,CG5695,CG7885,CG5336,CG6137,CG8472,CG34417	FBGN0001225, FBGN0086906, FBGN0000044, FBGN0034577, FBGN0001230, FBGN0020503, FBGN0011225, FBGN0026373, FBGN0032409, FBGN0000146, FBGN0000253, FBGN0085446	Hsp26,sls,Act57B,cpa,Hsp68,CLIP-190,jar,RpII33,Ced-12,aub,Cam,CG34417	62	300	10026	6.46839	0.00018793	3.75889e-05	0.00181027
CG18748	GOTERM_CC_DIRECT	GO:0016459~myosin complex	5	7.14286	6.86965e-06	CG7438,CG7595,CG5695,CG2146,CG9155	FBGN0086347, FBGN0000317, FBGN0011225, FBGN0261397, FBGN0010246	Myo31DF,ck,jar,didum,Myo61F	62	21	10026	38.5023	0.000817157	0.000136239	0.00787366
CG18748	GOTERM_CC_DIRECT	GO:0031941~filamentous actin	4	5.71429	7.43747e-05	CG7595,CG5695,CG3595,CG9155	FBGN0000317, FBGN0011225, FBGN0003514, FBGN0010246	ck,jar,sqh,Myo61F	62	14	10026	46.2028	0.00881186	0.00126362	0.0852145
CG18748	GOTERM_CC_DIRECT	GO:0005912~adherens junction	5	7.14286	0.000231701	CG3722,CG10540,CG18076,CG3595,CG17158	FBGN0003391, FBGN0034577, FBGN0013733, FBGN0003514, FBGN0011570	shg,cpa,shot,sqh,cpb	62	50	10026	16.171	0.0271988	0.00344101	0.265252
CG18748	GOTERM_CC_DIRECT	GO:0005856~cytoskeleton	5	7.14286	0.000499487	CG10083,CG3172,CG1539,CG2671,CG18076	FBGN0036372, FBGN0038206, FBGN0082582, FBGN0002121, FBGN0013733	Abp1,twf,tmod,l(2)gl,shot	62	61	10026	13.2549	0.0577209	0.00658421	0.571015
CG18748	GOTERM_CC_DIRECT	GO:0030496~midbody	4	5.71429	0.000504324	CG13345,CG3595,CG31012,CG8472	FBGN0086356, FBGN0003514, FBGN0027598, FBGN0000253	tum,sqh,cindr,Cam	62	26	10026	24.8784	0.0582635	0.00598499	0.57653
CG18748	GOTERM_CC_DIRECT	GO:0030426~growth cone	3	4.28571	0.00193326	CG10083,CG5695,CG18076	FBGN0036372, FBGN0011225, FBGN0013733	Abp1,jar,shot	62	11	10026	44.1026	0.205689	0.020717	2.19362
CG10086	GOTERM_CC_DIRECT	GO:0005730~nucleolus	12	16.2162	4.02234e-09	CG5824,CG7993,CG11583,CG3983,CG8939,CG4399,CG4554,CG8414,CG9004,CG9246,CG5728,CG6501	FBGN0010926, FBGN0038585, FBGN0035524, FBGN0038473, FBGN0030720, FBGN0261954, FBGN0034734, FBGN0034073, FBGN0035336, FBGN0032925, FBGN0039182, FBGN0034243	l(3)07882,Non3,CG11583,Ns1,CG8939,east,CG4554,CG8414,CG9004,CG9246,CG5728,Ns2	61	170	10026	11.6019	4.3039e-07	4.3039e-07	4.52135e-06
CG10086	GOTERM_CC_DIRECT	GO:0005634~nucleus	30	40.5405	9.99493e-08	CG12749,CG6474,CG13472,CG4399,CG2691,CG2009,CG3779,CG12304,CG10354,CG10042,CG42797,CG8939,CG4943,CG12396,CG5336,CG42279,CG8414,CG31671,CG5366,CG11680,CG11290,CG7831,CG7035,CG5206,CG6905,CG5728,CG4170,CG6875,CG2982,CG7483	FBGN0004237, FBGN0000617, FBGN0036450, FBGN0261954, FBGN0030504, FBGN0026262, FBGN0002973, FBGN0036515, FBGN0031868, FBGN0038016, FBGN0261931, FBGN0030720, FBGN0029006, FBGN0022069, FBGN0032409, FBGN0259174, FBGN0034073, FBGN0031390, FBGN0027568, FBGN0002774, FBGN0034975, FBGN0002924, FBGN0022942, FBGN0023097, FBGN0265574, FBGN0039182, FBGN0024183, FBGN0000140, FBGN0266570, FBGN0037573	Hrb87F,e(y)1,Tdrd3,east,CG2691,bip2,numb,AIMP2,Rat1,MBD-R2,CG42797,CG8939,Smurf,Nnp-1,Ced-12,Nedd4,CG8414,tho2,Cand1,mle,enok,ncd,Cbp80,bon,Cdc5,CG5728,vig,asp,CG2982,CG7483	61	1832	10026	2.6915	1.06945e-05	5.34727e-06	0.000112349
CG10086	GOTERM_CC_DIRECT	GO:0005737~cytoplasm	20	27.027	0.00127295	CG11680,CG12749,CG1451,CG1091,CG7595,CG15100,CG13472,CG18076,CG8994,CG4170,CG8710,CG6875,CG2212,CG3779,CG42797,CG42551,CG4943,CG14650,CG5336,CG42279	FBGN0002774, FBGN0004237, FBGN0015589, FBGN0037470, FBGN0000317, FBGN0034401, FBGN0036450, FBGN0013733, FBGN0000615, FBGN0024183, FBGN0033265, FBGN0000140, FBGN0003656, FBGN0002973, FBGN0261931, FBGN0261618, FBGN0029006, FBGN0037252, FBGN0032409, FBGN0259174	mle,Hrb87F,Apc,Tailor,ck,MetRS,Tdrd3,shot,exu,vig,coil,asp,sws,numb,CG42797,larp,Smurf,CG14650,Ced-12,Nedd4	61	1553	10026	2.11669	0.127413	0.0444144	1.42159
CG2641	GOTERM_CC_DIRECT	GO:1990423~RZZ complex	3	6.97674	3.96644e-05	CG1569,CG9900,CG18729	FBGN0003268, FBGN0004643, FBGN0061476	rod,Zw10,Zwilch	38	3	10026	263.842	0.00352398	0.00352398	0.0430485
CG2641	GOTERM_CC_DIRECT	GO:0000776~kinetochore	4	9.30233	0.000416112	CG1569,CG9900,CG18729,CG32435	FBGN0003268, FBGN0004643, FBGN0061476, FBGN0021760	rod,Zw10,Zwilch,chb	38	40	10026	26.3842	0.036364	0.0183504	0.450777
CG2641	GOTERM_CC_DIRECT	GO:0005768~endosome	4	9.30233	0.000852936	CG31729,CG6757,CG8683,CG6842	FBGN0051729, FBGN0040475, FBGN0031985, FBGN0283469	CG31729,SH3PX1,mon2,Vps4	38	51	10026	20.6935	0.0731316	0.0249968	0.922007
CG2641	GOTERM_CC_DIRECT	GO:0005828~kinetochore microtubule	3	6.97674	0.00100755	CG1569,CG9900,CG18729	FBGN0003268, FBGN0004643, FBGN0061476	rod,Zw10,Zwilch	38	13	10026	60.8866	0.0858101	0.0221796	1.08831
CG2641	GOTERM_CC_DIRECT	GO:0051233~spindle midzone	3	6.97674	0.0015393	CG1569,CG9900,CG18729	FBGN0003268, FBGN0004643, FBGN0061476	rod,Zw10,Zwilch	38	16	10026	49.4704	0.12812	0.0270482	1.65834
