# Supplementary material for: Comparative interactome analysis of α-arrestin families in human and Drosophila
Source: eLife. 2024 Jan 25;12:RP88328. doi: 10.7554/eLife.88328 (PMC10945707; doi:10.7554/eLife.88328)
Supplement: Supplementary file 8. — Predictions of orthologs for α-arrestins and their interacting proteins between human and Drosophila using DIOPT (A, B). Results of enrichment test of GO terms (biological process, molecular functions, and BP, MF, and KEGG pathway) in the identified orthologs are also summarized for human (C) and Drosophila (D). [file elife-88328-supp8.xlsx]

## Sheet: A. Human to Fly DIOPT
Human GeneID	Human Gene ID	HGNCID	Human Symbol	Species	Fly GeneID	FlyBaseID	Fly Symbol	DIOPT Score	Weighted Score	Rank	Best Score	Best Score Reverse	Prediction Derived From
ARRDC5	645432	31407	ARRDC5	Fly	59144	FBgn0042105	CG18748	2	2	moderate	Yes	No	eggNOG, Panther
ARRDC5	645432	31407	ARRDC5	Fly	40922	FBgn0037519	CG3014	2	2	moderate	Yes	No	eggNOG, Panther
ARRDC5	645432	31407	ARRDC5	Fly	41317	FBgn0037853	CG14696	2	2	moderate	Yes	No	eggNOG, Panther
ARRDC5	645432	31407	ARRDC5	Fly	59141	FBgn0042102	CG18745	2	2	moderate	Yes	No	eggNOG, Panther
ARRDC5	645432	31407	ARRDC5	Fly	59142	FBgn0042103	CG18746	2	2	moderate	Yes	No	eggNOG, Panther
ARRDC5	645432	31407	ARRDC5	Fly	40921	FBgn0037518	CG2641	2	2	moderate	Yes	No	eggNOG, Panther
ARRDC5	645432	31407	ARRDC5	Fly	40924	FBgn0037521	CG2993	2	2	moderate	Yes	No	eggNOG, Panther
ARRDC5	645432	31407	ARRDC5	Fly	40841	FBgn0037465	CG1105	2	2	moderate	Yes	No	eggNOG, Panther
ARRDC5	645432	31407	ARRDC5	Fly	41320	FBgn0037856	Leash	2	2	moderate	Yes	No	eggNOG, Panther
ARRDC5	645432	31407	ARRDC5	Fly	59140	FBgn0042101	CG18744	2	2	moderate	Yes	No	eggNOG, Panther
ARRDC5	645432	31407	ARRDC5	Fly	59143	FBgn0042104	CG18747	2	2	moderate	Yes	No	eggNOG, Panther
ARRDC5	645432	31407	ARRDC5	Fly	40920	FBgn0037517	CG10086	2	2	moderate	Yes	No	eggNOG, Panther
ARRDC5	645432	31407	ARRDC5	Fly	40923	FBgn0037520	CG18268	2	2	moderate	Yes	No	eggNOG, Panther
ABCG2	9429	74	ABCG2	Fly	33171	FBgn0025683	CG3164	2	2.03	low	No	No	OrthoFinder, RoundUp
ABCG2	9429	74	ABCG2	Fly	33541	FBgn0031516	CG9663	2	2.01	low	No	No	OrthoDB, OrthoFinder
ABCG2	9429	74	ABCG2	Fly	33354	FBgn0264494	CG17646	2	2.01	low	No	No	OrthoDB, OrthoFinder
ABCG2	9429	74	ABCG2	Fly	326154	FBgn0031449	CG31689	2	2.01	low	No	No	OrthoDB, OrthoFinder
ABCG2	9429	74	ABCG2	Fly	33636	FBgn0020762	Atet	2	2.01	low	No	No	OrthoDB, OrthoFinder
ABCG2	9429	74	ABCG2	Fly	33170	FBgn0031220	CG4822	2	2.01	low	No	No	OrthoDB, OrthoFinder
ABCG2	9429	74	ABCG2	Fly	37724	FBgn0000241	bw	2	2.01	low	No	No	OrthoDB, OrthoFinder
ABCG2	9429	74	ABCG2	Fly	43895	FBgn0020445	E23	2	1.94	low	No	No	Compara, OrthoDB
ABCG2	9429	74	ABCG2	Fly	33803	FBgn0031734	CG11147	2	1.91	moderate	No	Yes	OrthoFinder, Phylome
ABCG2	9429	74	ABCG2	Fly	43186	FBgn0053970	CG33970	2	1.91	moderate	No	Yes	OrthoFinder, Phylome
ABCG2	9429	74	ABCG2	Fly	43391	FBgn0039594	CG9990	2	1.91	moderate	No	Yes	OrthoFinder, Phylome
SLC2A1	6513	11005	SLC2A1	Fly	36248	FBgn0050035	Tret1-1	2	2.04	low	No	No	OrthoDB, RoundUp
SLC2A1	6513	11005	SLC2A1	Fly	40727	FBgn0037386	CG1208	2	1.91	low	No	No	OrthoDB, orthoMCL
USP11	8237	12609	USP11	Fly	33132	FBgn0031187	Usp2	2	2.04	low	No	No	OrthoDB, RoundUp
USP11	8237	12609	USP11	Fly	42509	FBgn0038862	Usp8	2	2.04	low	No	No	OrthoDB, RoundUp
USP11	8237	12609	USP11	Fly	37954	FBgn0050421	Usp15-31	2	1.85	low	No	No	eggNOG, Isobase
PLPP1	8611	9228	PLPP1	Fly	40672	FBgn0037341	CG12746	2	1.93	low	No	No	eggNOG, RoundUp
ATP6AP1	537	868	ATP6AP1	Fly	34661	FBgn0032434	CG5421	2	2	moderate	No	Yes	eggNOG, Panther
ATP6V1F	9296	16832	ATP6V1F	Fly	32249	FBgn0030440	CG15719	2	2.1	moderate	No	Yes	OrthoFinder, Panther
CACNA2D1	781	1399	CACNA2D1	Fly	37298	FBgn0034498	CG16868	2	1.81	low	No	No	eggNOG, Phylome
ARRDC2	27106	25225	ARRDC2	Fly	40922	FBgn0037519	CG3014	2	1.9	low	No	No	eggNOG, OrthoFinder
ARRDC2	27106	25225	ARRDC2	Fly	41317	FBgn0037853	CG14696	2	1.9	low	No	No	eggNOG, OrthoFinder
ARRDC2	27106	25225	ARRDC2	Fly	41320	FBgn0037856	Leash	2	1.9	low	No	No	eggNOG, OrthoFinder
ARRDC2	27106	25225	ARRDC2	Fly	59140	FBgn0042101	CG18744	2	1.9	low	No	No	eggNOG, OrthoFinder
ARRDC2	27106	25225	ARRDC2	Fly	40923	FBgn0037520	CG18268	2	1.9	low	No	No	eggNOG, OrthoFinder
PJA1	64219	16648	PJA1	Fly	42230	FBgn0038627	CG7694	2	2	moderate	Yes	No	eggNOG, Panther
PJA2	9867	17481	PJA2	Fly	42230	FBgn0038627	CG7694	2	2	moderate	Yes	No	eggNOG, Panther
LLGL1	3996	6628	LLGL1	Fly	32217	FBgn0030412	Tomosyn	2	1.9	low	No	No	eggNOG, OrthoFinder
WWP1	11059	17004	WWP1	Fly	36999	FBgn0029006	Smurf	2	1.91	low	No	No	eggNOG, OrthoDB
SETD1A	9739	29010	SETD1A	Fly	32301	FBgn0030486	Set2	2	2.04	low	No	No	OMA, RoundUp
SNRNP200	23020	30859	SNRNP200	Fly	41891	FBgn0038344	obe	2	1.8	low	No	No	eggNOG, orthoMCL
ARRDC4	91947	28087	ARRDC4	Fly	40922	FBgn0037519	CG3014	2	1.9	low	No	No	eggNOG, OrthoFinder
ARRDC4	91947	28087	ARRDC4	Fly	41317	FBgn0037853	CG14696	2	1.9	low	No	No	eggNOG, OrthoFinder
ARRDC4	91947	28087	ARRDC4	Fly	41320	FBgn0037856	Leash	2	1.9	low	No	No	eggNOG, OrthoFinder
ARRDC4	91947	28087	ARRDC4	Fly	59140	FBgn0042101	CG18744	2	1.9	low	No	No	eggNOG, OrthoFinder
ARRDC4	91947	28087	ARRDC4	Fly	40923	FBgn0037520	CG18268	2	1.9	low	No	No	eggNOG, OrthoFinder
ANKRD13A	88455	21268	ANKRD13A	Fly	37072	FBgn0034304	CG5742	2	1.91	low	No	No	eggNOG, OrthoDB
KIF16B	55614	15869	KIF16B	Fly	36876	FBgn0267002	unc-104	2	1.91	low	No	No	eggNOG, OrthoDB
KIF16B	55614	15869	KIF16B	Fly	36718	FBgn0019968	Khc-73	2	1.91	low	No	No	eggNOG, OrthoDB
ANKIB1	54467	22215	ANKIB1	Fly	37542	FBgn0025186	ari-2	2	1.91	low	No	No	eggNOG, OrthoDB
ANKIB1	54467	22215	ANKIB1	Fly	32796	FBgn0017418	ari-1	2	1.91	low	No	No	eggNOG, OrthoDB
ABCA3	21	33	ABCA3	Fly	318910	FBgn0263747	CG43672	2	1.81	moderate	No	Yes	eggNOG, Phylome
ABCA3	21	33	ABCA3	Fly	33102	FBgn0031169	CG1494	2	1.81	moderate	No	Yes	eggNOG, Phylome
ABCA3	21	33	ABCA3	Fly	318066	FBgn0083956	CG34120	2	1.8	low	No	No	eggNOG, orthoMCL
BMPR1A	657	1076	BMPR1A	Fly	35731	FBgn0003317	sax	2	1.91	low	No	No	eggNOG, OrthoDB
RHOBTB3	22836	18757	RHOBTB3	Fly	41136	FBgn0014380	RhoL	2	2	high	Yes	Yes	eggNOG, Panther
TXNIP	10628	16952	TXNIP	Fly	40922	FBgn0037519	CG3014	2	1.9	low	No	No	eggNOG, OrthoFinder
TXNIP	10628	16952	TXNIP	Fly	41317	FBgn0037853	CG14696	2	1.9	low	No	No	eggNOG, OrthoFinder
TXNIP	10628	16952	TXNIP	Fly	41320	FBgn0037856	Leash	2	1.9	low	No	No	eggNOG, OrthoFinder
TXNIP	10628	16952	TXNIP	Fly	59140	FBgn0042101	CG18744	2	1.9	low	No	No	eggNOG, OrthoFinder
TXNIP	10628	16952	TXNIP	Fly	40923	FBgn0037520	CG18268	2	1.9	low	No	No	eggNOG, OrthoFinder
SCRIB	23513	30377	SCRIB	Fly	36670	FBgn0033984	Lap1	2	1.91	low	No	No	eggNOG, OrthoDB
DOCK7	85440	19190	DOCK7	Fly	34030	FBgn0260486	Ziz	2	1.85	low	No	No	eggNOG, Isobase
PKN3	29941	17999	PKN3	Fly	43428	FBgn0003093	Pkc98E	2	1.93	low	No	No	eggNOG, RoundUp
PKN3	29941	17999	PKN3	Fly	48311	FBgn0003091	Pkc53E	2	1.93	low	No	No	eggNOG, RoundUp
PKN3	29941	17999	PKN3	Fly	32191	FBgn0259680	Pkcdelta	2	1.93	low	No	No	eggNOG, RoundUp
ARRDC3	57561	29263	ARRDC3	Fly	40922	FBgn0037519	CG3014	2	1.9	low	No	No	eggNOG, OrthoFinder
ARRDC3	57561	29263	ARRDC3	Fly	41320	FBgn0037856	Leash	2	1.9	low	No	No	eggNOG, OrthoFinder
ARRDC3	57561	29263	ARRDC3	Fly	59140	FBgn0042101	CG18744	2	1.9	low	No	No	eggNOG, OrthoFinder
ARRDC3	57561	29263	ARRDC3	Fly	40923	FBgn0037520	CG18268	2	1.9	low	No	No	eggNOG, OrthoFinder
ZC3H18	124245	25091	ZC3H18	Fly	318835	FBgn0051601	CG31601	2	1.91	moderate	No	Yes	eggNOG, OrthoDB
TRIM3	10612	10064	TRIM3	Fly	44653	FBgn0259745	wech	2	1.95	low	No	No	Isobase, OrthoInspector
SRSF1	6426	10780	SRSF1	Fly	41670	FBgn0004587	B52	2	2.03	low	No	No	OrthoFinder, RoundUp
CAMK2D	817	1462	CAMK2D	Fly	43792	FBgn0016126	CaMKI	2	1.91	low	No	No	OrthoDB, orthoMCL
CDK5	1020	1774	CDK5	Fly	38433	FBgn0005640	Eip63E	2	1.91	low	No	No	eggNOG, OrthoDB
INPP5F	22876	17054	INPP5F	Fly	38137	FBgn0283500	Sac1	2	1.96	low	No	No	Isobase, OrthoDB
SPEN	23013	17575	SPEN	Fly	35756	FBgn0027548	nito	2	1.91	low	No	No	eggNOG, OrthoDB
ADAMTS1	9510	217	ADAMTS1	Fly	31490	FBgn0029791	CG4096	2	1.85	low	No	No	eggNOG, Isobase
IK	3550	5958	IK	Fly	41419	FBgn0037943	CG14722	2	1.93	low	No	No	orthoMCL, RoundUp
NUMA1	4926	8059	NUMA1	Fly	44839	FBgn0002873	mud	2	2.11	high	Yes	Yes	OrthoDB, Panther
NUMA1	4926	8059	NUMA1	Fly	41459	FBgn0037979	GCC185	2	2.11	moderate	Yes	No	OrthoDB, Panther
DHX30	22907	16716	DHX30	Fly	35339	FBgn0032883	CG9323	2	1.91	moderate	Yes	No	eggNOG, OrthoDB
DHX30	22907	16716	DHX30	Fly	32021	FBgn0030246	CG1582	2	1.91	moderate	Yes	No	eggNOG, OrthoDB
DHX30	22907	16716	DHX30	Fly	35523	FBgn0002774	mle	2	1.91	moderate	Yes	No	eggNOG, OrthoDB
WDR34	89891	28296	WDR34	Fly	37374	FBgn0034566	CG9313	2	2.04	moderate	Yes	No	OrthoDB, RoundUp
PDLIM5	10611	17468	PDLIM5	Fly	36473	FBgn0259219	CG42319	2	2.1	moderate	No	Yes	OrthoFinder, Panther
CPSF3	51692	2326	CPSF3	Fly	43506	FBgn0039691	IntS11	2	1.91	low	No	No	eggNOG, OrthoDB
TNIK	23043	30765	TNIK	Fly	34012	FBgn0002938	ninaC	2	1.9	low	No	No	eggNOG, OrthoFinder
DNAJC10	54431	24637	DNAJC10	Fly	34976	FBgn0025678	CaBP1	2	1.91	moderate	Yes	No	eggNOG, OrthoDB
DNAJC10	54431	24637	DNAJC10	Fly	32124	FBgn0030329	prtp	2	1.91	moderate	Yes	No	eggNOG, OrthoDB
TBC1D9B	23061	29097	TBC1D9B	Fly	41960	FBgn0038401	CG5916	2	2.04	low	No	No	OrthoDB, RoundUp
MAP4K4	9448	6866	MAP4K4	Fly	34012	FBgn0002938	ninaC	2	1.9	low	No	No	eggNOG, OrthoFinder
RBM15B	29890	24303	RBM15B	Fly	44205	FBgn0016977	spen	2	1.91	low	No	No	eggNOG, OrthoDB
SERPINH1	871	1546	SERPINH1	Fly	34091	FBgn0031973	Spn28Dc	2	2.03	high	Yes	Yes	Compara, Panther
SERPINH1	871	1546	SERPINH1	Fly	35600	FBgn0033113	Spn42Dc	2	2.01	moderate	Yes	No	Panther, Phylome
SLC2A11	66035	14239	SLC2A11	Fly	44268	FBgn0028561	sut3	2	2.01	low	No	No	OrthoDB, OrthoFinder
MYO5A	4644	7602	MYO5A	Fly	38001	FBgn0265434	zip	2	1.8	low	No	No	eggNOG, orthoMCL
MYO5A	4644	7602	MYO5A	Fly	35007	FBgn0264695	Mhc	2	1.8	low	No	No	eggNOG, orthoMCL
MYO5A	4644	7602	MYO5A	Fly	39002	FBgn0003149	Prm	2	1.8	low	No	No	eggNOG, orthoMCL
LAMC1	3915	6492	LAMC1	Fly	32400	FBgn0015774	NetB	2	1.97	low	No	No	OrthoDB, TreeFam
LAMC1	3915	6492	LAMC1	Fly	32398	FBgn0015773	NetA	2	1.97	low	No	No	OrthoDB, TreeFam
LAMC1	3915	6492	LAMC1	Fly	43946	FBgn0261563	wb	2	1.91	low	No	No	eggNOG, OrthoDB
ABCG2	9429	74	ABCG2	Fly	39836	FBgn0003515	st	3	3.11	low	No	No	OrthoDB, OrthoFinder, Panther
ABCG2	9429	74	ABCG2	Fly	33540	FBgn0031515	CG9664	3	3.04	low	No	No	OrthoDB, OrthoFinder, RoundUp
ABCG2	9429	74	ABCG2	Fly	34322	FBgn0032167	CG5853	3	2.93	low	No	No	OrthoFinder, orthoMCL, RoundUp
SLC2A1	6513	11005	SLC2A1	Fly	44268	FBgn0028561	sut3	3	3.11	low	No	No	OrthoDB, OrthoFinder, Panther
ATP11C	286410	13554	ATP11C	Fly	41469	FBgn0037989	ATP8B	3	2.8	low	No	No	eggNOG, OrthoFinder, orthoMCL
ATP11B	23200	13553	ATP11B	Fly	41469	FBgn0037989	ATP8B	3	2.8	low	No	No	eggNOG, OrthoFinder, orthoMCL
USP11	8237	12609	USP11	Fly	40169	FBgn0036913	Usp32	3	2.94	moderate	Yes	No	eggNOG, OrthoDB, RoundUp
ATP6AP1	537	868	ATP6AP1	Fly	318563	FBgn0051030	CG31030	3	3.07	moderate	No	Yes	OrthoDB, Panther, TreeFam
CACNA2D1	781	1399	CACNA2D1	Fly	34951	FBgn0261999	CG42817	3	3.01	moderate	Yes	No	eggNOG, OrthoDB, Panther
CACNA2D1	781	1399	CACNA2D1	Fly	36526	FBgn0261041	stj	3	3.01	moderate	Yes	No	eggNOG, OrthoDB, Panther
CACNA2D1	781	1399	CACNA2D1	Fly	34921	FBgn0028863	CG4587	3	3.01	moderate	Yes	No	eggNOG, OrthoDB, Panther
ARRDC2	27106	25225	ARRDC2	Fly	40924	FBgn0037521	CG2993	3	2.9	moderate	No	Yes	eggNOG, OrthoFinder, OrthoInspector
ARRDC2	27106	25225	ARRDC2	Fly	40920	FBgn0037517	CG10086	3	2.9	moderate	No	Yes	eggNOG, OrthoFinder, OrthoInspector
ITCH	83737	13890	ITCH	Fly	36999	FBgn0029006	Smurf	3	2.94	low	No	No	eggNOG, OrthoDB, RoundUp
WWP2	11060	16804	WWP2	Fly	36999	FBgn0029006	Smurf	3	2.94	low	No	No	eggNOG, OrthoDB, RoundUp
WWP1	11059	17004	WWP1	Fly	39958	FBgn0259174	Nedd4	3	2.81	low	No	No	eggNOG, OrthoDB, orthoMCL
NEDD4L	23327	7728	NEDD4L	Fly	36999	FBgn0029006	Smurf	3	2.94	low	No	No	eggNOG, OrthoDB, RoundUp
TUBA1C	84790	20768	TUBA1C	Fly	39130	FBgn0087040	alphaTub67C	3	2.8	low	No	No	eggNOG, OrthoFinder, orthoMCL
FLNC	2318	3756	FLNC	Fly	43281	FBgn0039500	CG5984	3	3.01	moderate	No	Yes	eggNOG, OrthoDB, Panther
KCMF1	56888	20589	KCMF1	Fly	8674069	FBgn0260953	CG42585	3	2.79	moderate	No	Yes	Compara, eggNOG, TreeFam
ARRDC4	91947	28087	ARRDC4	Fly	38023	FBgn0035103	Vdup1	3	3	low	No	No	eggNOG, OrthoFinder, Panther
ARRDC4	91947	28087	ARRDC4	Fly	40924	FBgn0037521	CG2993	3	2.9	moderate	No	Yes	eggNOG, OrthoFinder, OrthoInspector
ARRDC4	91947	28087	ARRDC4	Fly	40920	FBgn0037517	CG10086	3	2.9	moderate	No	Yes	eggNOG, OrthoFinder, OrthoInspector
MYO1D	4642	7598	MYO1D	Fly	2768680	FBgn0039157	Myo95E	3	2.81	low	No	No	eggNOG, OrthoDB, orthoMCL
ANKIB1	54467	22215	ANKIB1	Fly	39193	FBgn0036082	CG12362	3	2.86	moderate	Yes	No	eggNOG, Isobase, OrthoDB
GNAS	2778	4392	GNAS	Fly	39861	FBgn0010223	Galphaf	3	2.87	low	No	No	eggNOG, OrthoDB, TreeFam
RAB9A	9367	9792	RAB9A	Fly	42841	FBgn0015795	Rab7	3	2.86	low	No	No	eggNOG, Isobase, OrthoDB
ABCA3	21	33	ABCA3	Fly	33104	FBgn0031171	CG1801	3	2.81	moderate	No	Yes	eggNOG, OrthoFinder, Phylome
BMPR1A	657	1076	BMPR1A	Fly	35900	FBgn0011300	babo	3	2.91	low	No	No	eggNOG, OrthoDB, OrthoFinder
TXNIP	10628	16952	TXNIP	Fly	40924	FBgn0037521	CG2993	3	2.9	moderate	No	Yes	eggNOG, OrthoFinder, OrthoInspector
TXNIP	10628	16952	TXNIP	Fly	40920	FBgn0037517	CG10086	3	2.9	moderate	No	Yes	eggNOG, OrthoFinder, OrthoInspector
NPHP3	27031	7907	NPHP3	Fly	39445	FBgn0010235	Klc	3	2.82	moderate	Yes	No	eggNOG, OrthoDB, Phylome
ARRDC3	57561	29263	ARRDC3	Fly	41317	FBgn0037853	CG14696	3	2.91	low	No	No	eggNOG, OMA, OrthoFinder
ARRDC3	57561	29263	ARRDC3	Fly	40924	FBgn0037521	CG2993	3	2.9	moderate	No	Yes	eggNOG, OrthoFinder, OrthoInspector
ARRDC3	57561	29263	ARRDC3	Fly	40920	FBgn0037517	CG10086	3	2.9	moderate	No	Yes	eggNOG, OrthoFinder, OrthoInspector
SMAD5	4090	6771	SMAD5	Fly	31738	FBgn0025800	Smox	3	2.91	low	No	No	eggNOG, Hieranoid, OrthoDB
NOLC1	9221	15608	NOLC1	Fly	40433	FBgn0037137	Nopp140	3	2.94	high	Yes	Yes	eggNOG, OMA, RoundUp
TRIM3	10612	10064	TRIM3	Fly	37190	FBgn0265356	tn	3	3.08	low	No	No	Inparanoid, OrthoInspector, RoundUp
SRSF7	6432	10789	SRSF7	Fly	34370	FBgn0011305	Rsf1	3	2.91	low	No	No	eggNOG, OrthoDB, OrthoFinder
CDK9	1025	1780	CDK9	Fly	40385	FBgn0037093	Cdk12	3	2.94	low	No	No	eggNOG, OrthoDB, RoundUp
MYO1E	4643	7599	MYO1E	Fly	2768680	FBgn0039157	Myo95E	3	2.81	low	No	No	eggNOG, OrthoDB, orthoMCL
DYRK1A	1859	3091	DYRK1A	Fly	3885567	FBgn0027101	Dyrk3	3	2.94	low	No	No	eggNOG, OrthoDB, RoundUp
DYRK1A	1859	3091	DYRK1A	Fly	38070	FBgn0035142	Hipk	3	2.94	low	No	No	eggNOG, OrthoDB, RoundUp
SDCBP	6386	10662	SDCBP	Fly	41592	FBgn0051342	CG31342	3	3.09	high	Yes	Yes	Panther, RoundUp, TreeFam
NEDD4	4734	7727	NEDD4	Fly	36999	FBgn0029006	Smurf	3	2.94	low	No	No	eggNOG, OrthoDB, RoundUp
CCNT1	904	1599	CCNT1	Fly	49816	FBgn0025674	CycK	3	2.91	low	No	No	eggNOG, OrthoDB, OrthoFinder
EIF4A3	9775	18683	EIF4A3	Fly	33835	FBgn0001942	eIF-4a	3	2.91	low	No	No	eggNOG, OrthoDB, OrthoFinder
GTPBP2	54676	4670	GTPBP2	Fly	37080	FBgn0027836	Dgp-1	3	2.81	low	No	No	eggNOG, OrthoDB, orthoMCL
RBM15	64783	14959	RBM15	Fly	44205	FBgn0016977	spen	3	2.87	low	No	No	eggNOG, OrthoDB, TreeFam
ARRDC1	92714	28633	ARRDC1	Fly	59144	FBgn0042105	CG18748	3	3	low	No	No	eggNOG, OrthoFinder, Panther
ARRDC1	92714	28633	ARRDC1	Fly	40922	FBgn0037519	CG3014	3	3	moderate	No	Yes	eggNOG, OrthoFinder, Panther
ARRDC1	92714	28633	ARRDC1	Fly	59142	FBgn0042103	CG18746	3	3	low	No	No	eggNOG, OrthoFinder, Panther
ARRDC1	92714	28633	ARRDC1	Fly	40921	FBgn0037518	CG2641	3	3	low	No	No	eggNOG, OrthoFinder, Panther
ARRDC1	92714	28633	ARRDC1	Fly	40924	FBgn0037521	CG2993	3	3	moderate	No	Yes	eggNOG, OrthoFinder, Panther
ARRDC1	92714	28633	ARRDC1	Fly	41320	FBgn0037856	Leash	3	3	moderate	No	Yes	eggNOG, OrthoFinder, Panther
ARRDC1	92714	28633	ARRDC1	Fly	59140	FBgn0042101	CG18744	3	3	moderate	No	Yes	eggNOG, OrthoFinder, Panther
ARRDC1	92714	28633	ARRDC1	Fly	59143	FBgn0042104	CG18747	3	3	low	No	No	eggNOG, OrthoFinder, Panther
ARRDC1	92714	28633	ARRDC1	Fly	40920	FBgn0037517	CG10086	3	3	moderate	No	Yes	eggNOG, OrthoFinder, Panther
ARRDC1	92714	28633	ARRDC1	Fly	40923	FBgn0037520	CG18268	3	3	moderate	No	Yes	eggNOG, OrthoFinder, Panther
SLC2A11	66035	14239	SLC2A11	Fly	35774	FBgn0028563	sut1	3	2.91	low	No	No	eggNOG, OrthoDB, OrthoFinder
SLC2A11	66035	14239	SLC2A11	Fly	44269	FBgn0028562	sut2	3	2.91	low	No	No	eggNOG, OrthoDB, OrthoFinder
SLC2A11	66035	14239	SLC2A11	Fly	35520	FBgn0033047	CG7882	3	2.91	low	No	No	eggNOG, OrthoDB, OrthoFinder
LAMA1	284217	6481	LAMA1	Fly	39118	FBgn0267348	LanB2	3	2.81	low	No	No	eggNOG, OrthoDB, orthoMCL
LAMA5	3911	6485	LAMA5	Fly	43946	FBgn0261563	wb	3	2.87	low	No	No	eggNOG, OrthoDB, TreeFam
LAMA5	3911	6485	LAMA5	Fly	39118	FBgn0267348	LanB2	3	2.81	low	No	No	eggNOG, OrthoDB, orthoMCL
SMURF1	57154	16807	SMURF1	Fly	33379	FBgn0003557	Su(dx)	3	2.94	low	No	No	eggNOG, OrthoDB, RoundUp
SMURF1	57154	16807	SMURF1	Fly	39958	FBgn0259174	Nedd4	3	2.94	low	No	No	eggNOG, OrthoDB, RoundUp
LAMC1	3915	6492	LAMC1	Fly	38723	FBgn0002526	LanA	3	2.81	low	No	No	eggNOG, OrthoDB, orthoMCL
SLC2A1	6513	11005	SLC2A1	Fly	35774	FBgn0028563	sut1	4	4.01	moderate	No	No	eggNOG, OrthoDB, OrthoFinder, Panther
SLC2A1	6513	11005	SLC2A1	Fly	44269	FBgn0028562	sut2	4	4.01	moderate	No	No	eggNOG, OrthoDB, OrthoFinder, Panther
SLC2A1	6513	11005	SLC2A1	Fly	35520	FBgn0033047	CG7882	4	4.01	moderate	No	No	eggNOG, OrthoDB, OrthoFinder, Panther
ATP6V0A2	23545	18481	ATP6V0A2	Fly	246543	FBgn0028669	Vha100-3	4	3.92	moderate	No	No	eggNOG, OrthoDB, Panther, Phylome
STOM	2040	3383	STOM	Fly	40536	FBgn0250821	CG14644	4	3.94	moderate	No	Yes	Compara, eggNOG, OrthoDB, Panther
STOM	2040	3383	STOM	Fly	41466	FBgn0037986	CG14736	4	3.84	moderate	No	Yes	Compara, eggNOG, OrthoDB, OrthoFinder
STOM	2040	3383	STOM	Fly	41462	FBgn0051358	CG31358	4	3.84	moderate	No	Yes	Compara, eggNOG, OrthoDB, OrthoFinder
ARRDC2	27106	25225	ARRDC2	Fly	38023	FBgn0035103	Vdup1	4	4.03	moderate	No	No	eggNOG, OrthoFinder, Panther, RoundUp
ARRDC2	27106	25225	ARRDC2	Fly	59144	FBgn0042105	CG18748	4	3.95	moderate	No	Yes	eggNOG, Inparanoid, OrthoFinder, OrthoInspector
ARRDC2	27106	25225	ARRDC2	Fly	59141	FBgn0042102	CG18745	4	3.95	moderate	No	No	eggNOG, Inparanoid, OrthoFinder, OrthoInspector
ARRDC2	27106	25225	ARRDC2	Fly	59142	FBgn0042103	CG18746	4	3.95	moderate	No	Yes	eggNOG, Inparanoid, OrthoFinder, OrthoInspector
ARRDC2	27106	25225	ARRDC2	Fly	59143	FBgn0042104	CG18747	4	3.95	moderate	No	Yes	eggNOG, Inparanoid, OrthoFinder, OrthoInspector
ITCH	83737	13890	ITCH	Fly	39958	FBgn0259174	Nedd4	4	3.84	moderate	No	No	eggNOG, OrthoDB, orthoMCL, RoundUp
WWP2	11060	16804	WWP2	Fly	39958	FBgn0259174	Nedd4	4	3.84	moderate	No	No	eggNOG, OrthoDB, orthoMCL, RoundUp
UBE3C	9690	16803	UBE3C	Fly	39035	FBgn0035953	CG5087	4	3.84	moderate	No	No	eggNOG, OrthoDB, orthoMCL, RoundUp
NEDD4L	23327	7728	NEDD4L	Fly	33379	FBgn0003557	Su(dx)	4	3.84	moderate	No	No	eggNOG, OrthoDB, orthoMCL, RoundUp
ZCCHC2	54877	22916	ZCCHC2	Fly	35177	FBgn0032748	CG10492	4	3.93	high	Yes	Yes	eggNOG, Hieranoid, OrthoFinder, RoundUp
FLNC	2318	3756	FLNC	Fly	43997	FBgn0028371	jbug	4	3.84	moderate	No	No	Compara, eggNOG, OrthoDB, OrthoFinder
HDAC2	3066	4853	HDAC2	Fly	44446	FBgn0025825	HDAC3	4	3.81	moderate	No	No	eggNOG, OrthoDB, OrthoFinder, orthoMCL
ARRDC4	91947	28087	ARRDC4	Fly	59144	FBgn0042105	CG18748	4	3.95	high	Yes	Yes	eggNOG, Inparanoid, OrthoFinder, OrthoInspector
ARRDC4	91947	28087	ARRDC4	Fly	59141	FBgn0042102	CG18745	4	3.95	moderate	Yes	No	eggNOG, Inparanoid, OrthoFinder, OrthoInspector
ARRDC4	91947	28087	ARRDC4	Fly	59142	FBgn0042103	CG18746	4	3.95	high	Yes	Yes	eggNOG, Inparanoid, OrthoFinder, OrthoInspector
ARRDC4	91947	28087	ARRDC4	Fly	40921	FBgn0037518	CG2641	4	3.95	moderate	Yes	No	eggNOG, Inparanoid, OrthoFinder, OrthoInspector
ARRDC4	91947	28087	ARRDC4	Fly	40841	FBgn0037465	CG1105	4	3.95	moderate	Yes	No	eggNOG, Inparanoid, OrthoFinder, OrthoInspector
ARRDC4	91947	28087	ARRDC4	Fly	59143	FBgn0042104	CG18747	4	3.95	high	Yes	Yes	eggNOG, Inparanoid, OrthoFinder, OrthoInspector
MYO1D	4642	7598	MYO1D	Fly	38153	FBgn0010246	Myo61F	4	3.81	moderate	No	No	eggNOG, OrthoDB, OrthoFinder, orthoMCL
MYO1B	4430	7596	MYO1B	Fly	34445	FBgn0086347	Myo31DF	4	3.81	moderate	No	No	eggNOG, OrthoDB, OrthoFinder, orthoMCL
MYO1B	4430	7596	MYO1B	Fly	38153	FBgn0010246	Myo61F	4	3.81	moderate	No	No	eggNOG, OrthoDB, OrthoFinder, orthoMCL
MAGED2	10916	16353	MAGED2	Fly	40860	FBgn0037481	MAGE	4	3.92	moderate	Yes	No	eggNOG, OrthoDB, Panther, Phylome
PLXNB2	23654	9104	PLXNB2	Fly	43832	FBgn0025741	PlexA	4	4.01	moderate	No	No	OrthoDB, OrthoFinder, orthoMCL, Panther
CPD	1362	2301	CPD	Fly	32652	FBgn0030778	CG4678	4	4.04	moderate	No	No	eggNOG, OrthoDB, Panther, RoundUp
ABCA3	21	33	ABCA3	Fly	34783	FBgn0028539	CG31731	4	3.83	moderate	No	Yes	Compara, eggNOG, orthoMCL, Panther
TXNIP	10628	16952	TXNIP	Fly	59144	FBgn0042105	CG18748	4	3.95	moderate	No	Yes	eggNOG, Inparanoid, OrthoFinder, OrthoInspector
TXNIP	10628	16952	TXNIP	Fly	59141	FBgn0042102	CG18745	4	3.95	moderate	No	No	eggNOG, Inparanoid, OrthoFinder, OrthoInspector
TXNIP	10628	16952	TXNIP	Fly	59142	FBgn0042103	CG18746	4	3.95	moderate	No	Yes	eggNOG, Inparanoid, OrthoFinder, OrthoInspector
TXNIP	10628	16952	TXNIP	Fly	59143	FBgn0042104	CG18747	4	3.95	moderate	No	Yes	eggNOG, Inparanoid, OrthoFinder, OrthoInspector
MAGED4	728239	23793	MAGED4	Fly	40860	FBgn0037481	MAGE	4	3.85	moderate	Yes	No	eggNOG, OrthoDB, Phylome, RoundUp
ARRDC3	57561	29263	ARRDC3	Fly	38023	FBgn0035103	Vdup1	4	4.03	moderate	No	No	eggNOG, OrthoFinder, Panther, RoundUp
ARRDC3	57561	29263	ARRDC3	Fly	59144	FBgn0042105	CG18748	4	3.95	moderate	No	Yes	eggNOG, Inparanoid, OrthoFinder, OrthoInspector
ARRDC3	57561	29263	ARRDC3	Fly	59142	FBgn0042103	CG18746	4	3.95	moderate	No	Yes	eggNOG, Inparanoid, OrthoFinder, OrthoInspector
ARRDC3	57561	29263	ARRDC3	Fly	59143	FBgn0042104	CG18747	4	3.95	moderate	No	Yes	eggNOG, Inparanoid, OrthoFinder, OrthoInspector
NCBP1	4686	7658	NCBP1	Fly	42539	FBgn0038887	CG7907	4	3.97	moderate	No	Yes	eggNOG, OrthoDB, Panther, TreeFam
TRIM3	10612	10064	TRIM3	Fly	35197	FBgn0010300	brat	4	3.84	high	Yes	Yes	Isobase, orthoMCL, RoundUp, TreeFam
CFAP20	29105	29523	CFAP20	Fly	34478	FBgn0032291	CG17118	4	3.89	moderate	No	Yes	Compara, eggNOG, Panther, TreeFam
DYRK1A	1859	3091	DYRK1A	Fly	34831	FBgn0016930	Dyrk2	4	3.95	moderate	No	No	eggNOG, OMA, OrthoDB, RoundUp
NEDD4	4734	7727	NEDD4	Fly	33379	FBgn0003557	Su(dx)	4	3.84	moderate	No	No	eggNOG, OrthoDB, orthoMCL, RoundUp
BIRC2	329	590	BIRC2	Fly	42077	FBgn0264291	Det	4	3.94	moderate	No	No	eggNOG, OrthoDB, OrthoFinder, RoundUp
ARRDC1	92714	28633	ARRDC1	Fly	41317	FBgn0037853	CG14696	4	4.01	moderate	No	Yes	eggNOG, OMA, OrthoFinder, Panther
ARRDC1	92714	28633	ARRDC1	Fly	59141	FBgn0042102	CG18745	4	4.01	moderate	No	No	eggNOG, OMA, OrthoFinder, Panther
ARRDC1	92714	28633	ARRDC1	Fly	40841	FBgn0037465	CG1105	4	3.96	moderate	No	No	eggNOG, OrthoFinder, Panther, TreeFam
SLC2A11	66035	14239	SLC2A11	Fly	38109	FBgn0264574	Glut1	4	4.01	moderate	Yes	No	eggNOG, OrthoDB, OrthoFinder, Panther
LAMA1	284217	6481	LAMA1	Fly	38723	FBgn0002526	LanA	4	3.91	moderate	No	No	eggNOG, OrthoDB, orthoMCL, Panther
FGFRL1	53834	3693	FGFRL1	Fly	326138	FBgn0051431	CG31431	4	3.89	high	Yes	Yes	Compara, Isobase, Panther, Phylome
ABCD3	5825	67	ABCD3	Fly	43772	FBgn0039890	CG2316	5	4.84	moderate	No	No	eggNOG, OrthoDB, OrthoFinder, orthoMCL, RoundUp
ATP6V0A2	23545	18481	ATP6V0A2	Fly	34587	FBgn0032373	Vha100-5	5	4.81	moderate	No	No	eggNOG, OrthoFinder, orthoMCL, Panther, Phylome
ARRDC2	27106	25225	ARRDC2	Fly	40921	FBgn0037518	CG2641	5	4.98	moderate	No	Yes	eggNOG, Inparanoid, OrthoFinder, OrthoInspector, RoundUp
PRKAR1A	5573	9388	PRKAR1A	Fly	36041	FBgn0022382	Pka-R2	5	4.84	moderate	No	No	eggNOG, OrthoDB, OrthoFinder, orthoMCL, RoundUp
TUBA1C	84790	20768	TUBA1C	Fly	41183	FBgn0003886	alphaTub85E	5	4.82	moderate	No	No	eggNOG, OMA, OrthoDB, OrthoFinder, orthoMCL
KCMF1	56888	20589	KCMF1	Fly	31277	FBgn0040355	CG3526	5	4.94	moderate	No	Yes	Compara, eggNOG, OrthoDB, OrthoFinder, Panther
KCMF1	56888	20589	KCMF1	Fly	326149	FBgn0051642	CG31642	5	4.84	moderate	No	Yes	Compara, eggNOG, Isobase, Panther, TreeFam
TUBGCP2	10844	18599	TUBGCP2	Fly	38852	FBgn0035800	CG7716	5	4.82	moderate	No	Yes	eggNOG, Isobase, Panther, Phylome, TreeFam
PLXNB2	23654	9104	PLXNB2	Fly	43766	FBgn0025740	PlexB	5	4.85	moderate	Yes	No	Compara, OrthoDB, orthoMCL, Panther, Phylome
ABCA3	21	33	ABCA3	Fly	39977	FBgn0261998	CG42816	5	4.85	moderate	No	Yes	Compara, eggNOG, OrthoDB, Panther, Phylome
ABCA3	21	33	ABCA3	Fly	42382	FBgn0051213	CG31213	5	4.85	moderate	No	Yes	Compara, eggNOG, OrthoDB, Panther, Phylome
TXNIP	10628	16952	TXNIP	Fly	38023	FBgn0035103	Vdup1	5	5.04	moderate	Yes	No	eggNOG, OMA, OrthoFinder, Panther, RoundUp
TXNIP	10628	16952	TXNIP	Fly	40921	FBgn0037518	CG2641	5	4.98	high	Yes	Yes	eggNOG, Inparanoid, OrthoFinder, OrthoInspector, RoundUp
TXNIP	10628	16952	TXNIP	Fly	40841	FBgn0037465	CG1105	5	4.98	moderate	Yes	No	eggNOG, Inparanoid, OrthoFinder, OrthoInspector, RoundUp
RLIM	51132	13429	RLIM	Fly	41145	FBgn0037705	mura	5	4.84	moderate	Yes	No	Compara, eggNOG, Hieranoid, Inparanoid, TreeFam
ARRDC3	57561	29263	ARRDC3	Fly	40921	FBgn0037518	CG2641	5	4.98	moderate	No	Yes	eggNOG, Inparanoid, OrthoFinder, OrthoInspector, RoundUp
ARRDC3	57561	29263	ARRDC3	Fly	59141	FBgn0042102	CG18745	5	4.96	moderate	No	Yes	eggNOG, Inparanoid, OMA, OrthoFinder, OrthoInspector
MYO1E	4643	7599	MYO1E	Fly	34445	FBgn0086347	Myo31DF	5	4.84	moderate	Yes	No	eggNOG, OrthoDB, OrthoFinder, orthoMCL, RoundUp
MYO1E	4643	7599	MYO1E	Fly	38153	FBgn0010246	Myo61F	5	4.76	moderate	Yes	No	eggNOG, Isobase, OrthoDB, OrthoFinder, orthoMCL
WDR82	80335	28826	WDR82	Fly	33437	FBgn0031431	CG3515	5	4.91	moderate	No	Yes	eggNOG, Isobase, OrthoFinder, Panther, TreeFam
CDK5	1020	1774	CDK5	Fly	42453	FBgn0004107	Cdk2	5	4.84	moderate	No	No	eggNOG, OrthoDB, OrthoFinder, orthoMCL, RoundUp
CDK5	1020	1774	CDK5	Fly	34411	FBgn0004106	Cdk1	5	4.84	moderate	No	No	eggNOG, OrthoDB, OrthoFinder, orthoMCL, RoundUp
CTNND1	1500	2515	CTNND1	Fly	3355143	FBgn0260799	p120ctn	5	4.99	moderate	Yes	No	Compara, eggNOG, Inparanoid, OrthoDB, Panther
TP53	7157	11998	TP53	Fly	2768677	FBgn0039044	p53	5	5.05	moderate	Yes	No	Isobase, OrthoDB, Panther, RoundUp, TreeFam
ABCG2	9429	74	ABCG2	Fly	31271	FBgn0003996	w	6	5.89	high	Yes	Yes	Homologene, Isobase, OrthoDB, OrthoFinder, orthoMCL, RoundUp
ATP6V0A1	535	865	ATP6V0A1	Fly	246543	FBgn0028669	Vha100-3	6	5.83	moderate	No	Yes	eggNOG, Isobase, OrthoDB, Panther, Phylome, TreeFam
ATP6V0A2	23545	18481	ATP6V0A2	Fly	42216	FBgn0028670	Vha100-2	6	5.82	moderate	Yes	No	eggNOG, OrthoDB, OrthoFinder, orthoMCL, Panther, Phylome
ATP6V0A2	23545	18481	ATP6V0A2	Fly	43442	FBgn0028671	Vha100-1	6	5.82	moderate	Yes	No	eggNOG, OrthoDB, OrthoFinder, orthoMCL, Panther, Phylome
ATP6V0A2	23545	18481	ATP6V0A2	Fly	42214	FBgn0038613	Vha100-4	6	5.82	moderate	Yes	No	eggNOG, OrthoDB, OrthoFinder, orthoMCL, Panther, Phylome
PLPP1	8611	9228	PLPP1	Fly	40470	FBgn0037165	CG11437	6	5.85	moderate	No	Yes	Compara, eggNOG, OrthoDB, OrthoFinder, Panther, Phylome
ATP6AP1	537	868	ATP6AP1	Fly	35944	FBgn0262515	VhaAC45	6	5.93	high	Yes	Yes	Compara, eggNOG, OrthoDB, Panther, RoundUp, TreeFam
ATP6V1F	9296	16832	ATP6V1F	Fly	40748	FBgn0037402	Vha14-2	6	5.83	moderate	No	Yes	eggNOG, Isobase, OrthoDB, Panther, Phylome, TreeFam
ATP6V1A	523	851	ATP6V1A	Fly	34695	FBgn0032464	Vha68-3	6	5.72	moderate	No	Yes	eggNOG, Isobase, orthoMCL, Panther, Phylome, TreeFam
ARRDC2	27106	25225	ARRDC2	Fly	40841	FBgn0037465	CG1105	6	5.98	high	Yes	Yes	eggNOG, Homologene, Inparanoid, OrthoFinder, OrthoInspector, RoundUp
ABCA3	21	33	ABCA3	Fly	37293	FBgn0034493	CG8908	6	5.6	moderate	No	Yes	Compara, eggNOG, Isobase, OrthoDB, orthoMCL, Phylome
ARRDC3	57561	29263	ARRDC3	Fly	40841	FBgn0037465	CG1105	6	5.88	high	Yes	Yes	eggNOG, Inparanoid, OrthoFinder, OrthoInspector, orthoMCL, RoundUp
SRSF7	6432	10789	SRSF7	Fly	41294	FBgn0260944	Rbp1	6	5.7	moderate	No	No	Compara, eggNOG, OrthoDB, OrthoFinder, orthoMCL, TreeFam
ADAMTS1	9510	217	ADAMTS1	Fly	41887	FBgn0038341	AdamTS-A	6	5.85	moderate	Yes	No	eggNOG, OrthoDB, orthoMCL, Panther, Phylome, RoundUp
RNPS1	10921	10080	RNPS1	Fly	5740122	FBgn0263829	CG34334	6	5.93	moderate	No	Yes	Compara, eggNOG, OrthoDB, Panther, RoundUp, TreeFam
PDLIM5	10611	17468	PDLIM5	Fly	36740	FBgn0265991	Zasp52	6	5.89	moderate	Yes	No	Compara, eggNOG, OrthoFinder, OrthoInspector, Panther, TreeFam
ARRDC1	92714	28633	ARRDC1	Fly	38023	FBgn0035103	Vdup1	6	5.84	high	Yes	Yes	Compara, eggNOG, Inparanoid, OrthoFinder, OrthoInspector, TreeFam
ATP6V0A1	535	865	ATP6V0A1	Fly	42214	FBgn0038613	Vha100-4	7	6.78	moderate	No	Yes	eggNOG, OrthoDB, OrthoFinder, orthoMCL, Panther, Phylome, TreeFam
ATP6V0A1	535	865	ATP6V0A1	Fly	34587	FBgn0032373	Vha100-5	7	6.72	moderate	No	Yes	eggNOG, Isobase, OrthoFinder, orthoMCL, Panther, Phylome, TreeFam
STOM	2040	3383	STOM	Fly	2768889	FBgn0030992	CG33253	7	6.8	moderate	No	Yes	Compara, eggNOG, OrthoDB, OrthoFinder, orthoMCL, Panther, TreeFam
STOM	2040	3383	STOM	Fly	32905	FBgn0030993	Mec2	7	6.8	moderate	No	Yes	Compara, eggNOG, OrthoDB, OrthoFinder, orthoMCL, Panther, TreeFam
ATP6V0C	527	855	ATP6V0C	Fly	34482	FBgn0032294	Vha16-5	7	6.76	moderate	No	Yes	Compara, eggNOG, Isobase, OrthoDB, Panther, Phylome, TreeFam
SLC12A2	6558	10911	SLC12A2	Fly	40663	FBgn0051547	CG31547	7	6.7	moderate	No	No	Compara, eggNOG, Hieranoid, orthoMCL, Panther, Phylome, TreeFam
HECW2	57520	29853	HECW2	Fly	31905	FBgn0261931	CG42797	7	6.88	high	Yes	Yes	Compara, eggNOG, OrthoDB, OrthoInspector, Panther, Phylome, RoundUp
TUBA1C	84790	20768	TUBA1C	Fly	40904	FBgn0003885	alphaTub84D	7	6.86	moderate	No	No	eggNOG, Homologene, Inparanoid, OrthoDB, OrthoFinder, OrthoInspector, orthoMCL
KCMF1	56888	20589	KCMF1	Fly	34834	FBgn0028531	CG15286	7	6.85	moderate	No	Yes	Compara, eggNOG, Isobase, OrthoDB, OrthoFinder, Panther, TreeFam
KCMF1	56888	20589	KCMF1	Fly	318972	FBgn0051835	CG31835	7	6.76	moderate	No	Yes	Compara, eggNOG, Isobase, OrthoDB, Panther, Phylome, TreeFam
BOD1L1	259282	31792	BOD1L1	Fly	43352	FBgn0039560	BOD1	7	6.84	moderate	Yes	No	Compara, eggNOG, OrthoDB, OrthoFinder, OrthoInspector, orthoMCL, Panther
SVIL	6840	11480	SVIL	Fly	38306	FBgn0266696	CG45186	7	6.98	high	Yes	Yes	Compara, Hieranoid, OrthoDB, OrthoInspector, Panther, Phylome, RoundUp
ABCB1	5243	40	ABCB1	Fly	38725	FBgn0035695	CG10226	7	6.84	moderate	No	No	Compara, eggNOG, Hieranoid, OrthoDB, OrthoFinder, orthoMCL, Panther
SCRIB	23513	30377	SCRIB	Fly	44448	FBgn0263289	scrib	7	7.07	high	Yes	Yes	Hieranoid, Inparanoid, OrthoDB, OrthoFinder, OrthoInspector, Panther, Phylome
SRSF7	6432	10789	SRSF7	Fly	32293	FBgn0030479	Rbp1-like	7	6.73	moderate	No	Yes	Compara, eggNOG, OrthoDB, OrthoFinder, orthoMCL, RoundUp, TreeFam
BIRC2	329	590	BIRC2	Fly	39753	FBgn0260635	Diap1	7	6.98	moderate	No	Yes	eggNOG, Hieranoid, OMA, OrthoDB, OrthoFinder, Panther, TreeFam
U2AF2	11338	23156	U2AF2	Fly	37681	FBgn0034834	LS2	7	6.75	moderate	No	Yes	Compara, eggNOG, Isobase, OrthoFinder, Panther, Phylome, TreeFam
CSNK2A2	1459	2459	CSNK2A2	Fly	48448	FBgn0264492	CkIIalpha	7	6.71	moderate	Yes	No	eggNOG, OrthoDB, OrthoFinder, orthoMCL, Phylome, RoundUp, TreeFam
EPB41L4B	54566	19818	EPB41L4B	Fly	41656	FBgn0004049	yrt	7	6.94	moderate	Yes	No	Compara, OrthoDB, OrthoInspector, Panther, Phylome, RoundUp, TreeFam
ATP6V0D1	9114	13724	ATP6V0D1	Fly	42739	FBgn0039058	VhaAC39-2	8	7.65	moderate	No	Yes	Compara, eggNOG, Isobase, OrthoFinder, orthoMCL, Panther, Phylome, TreeFam
PLPP1	8611	9228	PLPP1	Fly	40471	FBgn0037166	CG11426	8	7.95	moderate	No	No	Compara, Hieranoid, Inparanoid, OrthoFinder, OrthoInspector, Panther, Phylome, TreeFam
PLPP1	8611	9228	PLPP1	Fly	40469	FBgn0037164	CG11438	8	7.91	moderate	No	Yes	Compara, Hieranoid, OrthoDB, OrthoFinder, OrthoInspector, Panther, Phylome, TreeFam
PLPP1	8611	9228	PLPP1	Fly	40472	FBgn0037167	CG11425	8	7.8	moderate	No	Yes	Compara, eggNOG, Hieranoid, Isobase, OrthoDB, OrthoFinder, Panther, Phylome
ATP6V0C	527	855	ATP6V0C	Fly	39282	FBgn0028668	Vha16-2	8	7.76	moderate	No	Yes	Compara, eggNOG, Isobase, OrthoDB, OrthoFinder, Panther, Phylome, TreeFam
EPB41L3	23136	3380	EPB41L3	Fly	37205	FBgn0010434	cora	8	7.77	high	Yes	Yes	Compara, eggNOG, Inparanoid, OrthoFinder, OrthoInspector, orthoMCL, RoundUp, TreeFam
TUBA1C	84790	20768	TUBA1C	Fly	40848	FBgn0003884	alphaTub84B	8	7.89	moderate	Yes	No	eggNOG, Homologene, Inparanoid, OrthoDB, OrthoFinder, OrthoInspector, orthoMCL, RoundUp
ARHGEF2	9181	682	ARHGEF2	Fly	35237	FBgn0032796	CG10188	8	7.85	moderate	Yes	No	Compara, eggNOG, Hieranoid, Inparanoid, OrthoInspector, Panther, Phylome, TreeFam
PDXDC1	23042	28995	PDXDC1	Fly	33108	FBgn0031174	CG1486	8	7.8	high	Yes	Yes	Compara, eggNOG, Homologene, OMA, OrthoFinder, orthoMCL, Panther, TreeFam
NUDT19	390916	32036	NUDT19	Fly	35228	FBgn0032787	CG10195	8	7.91	moderate	No	Yes	Compara, Hieranoid, OrthoDB, OrthoFinder, OrthoInspector, Panther, Phylome, TreeFam
NUDT19	390916	32036	NUDT19	Fly	35232	FBgn0032791	CG18094	8	7.8	moderate	No	Yes	Compara, eggNOG, Hieranoid, OrthoFinder, OrthoInspector, Panther, Phylome, TreeFam
ATP6V0A1	535	865	ATP6V0A1	Fly	42216	FBgn0028670	Vha100-2	9	8.73	moderate	No	Yes	eggNOG, Hieranoid, Isobase, OrthoDB, OrthoFinder, orthoMCL, Panther, Phylome, TreeFam
ATP11C	286410	13554	ATP11C	Fly	32610	FBgn0030747	CG4301	9	8.97	moderate	No	No	Compara, Hieranoid, Inparanoid, OMA, OrthoDB, OrthoFinder, Panther, Phylome, TreeFam
PLPP1	8611	9228	PLPP1	Fly	40468	FBgn0037163	laza	9	8.84	moderate	No	Yes	Compara, eggNOG, Hieranoid, OrthoDB, OrthoFinder, Panther, Phylome, RoundUp, TreeFam
STOM	2040	3383	STOM	Fly	38562	FBgn0260657	CG42540	9	8.76	high	Yes	Yes	Compara, eggNOG, Hieranoid, Homologene, Inparanoid, OrthoDB, OrthoInspector, Phylome, TreeFam
ATP6V0C	527	855	ATP6V0C	Fly	36900	FBgn0262513	Vha16-4	9	8.66	moderate	No	Yes	Compara, eggNOG, Isobase, OrthoDB, OrthoFinder, orthoMCL, Panther, Phylome, TreeFam
MAP1B	4131	6836	MAP1B	Fly	5740544	FBgn0259108	futsch	9	8.85	moderate	Yes	No	Compara, eggNOG, Inparanoid, OrthoDB, OrthoFinder, OrthoInspector, orthoMCL, Panther, TreeFam
MYO1B	4430	7596	MYO1B	Fly	2768680	FBgn0039157	Myo95E	9	8.7	high	Yes	Yes	Compara, eggNOG, Hieranoid, Homologene, Isobase, OrthoDB, orthoMCL, Panther, Phylome
PSMB2	5690	9539	PSMB2	Fly	33449	FBgn0031442	Prosbeta4R1	9	8.76	moderate	No	Yes	Compara, eggNOG, Hieranoid, Isobase, OrthoDB, OrthoFinder, Panther, Phylome, TreeFam
PSMC5	5705	9552	PSMC5	Fly	43635	FBgn0039788	Rpt6R	9	8.71	moderate	No	Yes	Compara, eggNOG, Hieranoid, OrthoDB, OrthoFinder, orthoMCL, Panther, Phylome, TreeFam
ABCB1	5243	40	ABCB1	Fly	36428	FBgn0004512	Mdr49	9	8.78	moderate	No	No	Compara, eggNOG, Hieranoid, OrthoDB, OrthoFinder, orthoMCL, Panther, Phylome, RoundUp
ABCB1	5243	40	ABCB1	Fly	38726	FBgn0004513	Mdr65	9	8.78	moderate	No	No	Compara, eggNOG, Hieranoid, OrthoDB, OrthoFinder, orthoMCL, Panther, Phylome, RoundUp
RAB11FIP5	26056	24845	RAB11FIP5	Fly	32850	FBgn0027335	Rip11	9	9.08	moderate	Yes	No	Compara, Hieranoid, Inparanoid, OrthoDB, OrthoFinder, OrthoInspector, Panther, RoundUp, TreeFam
SRSF7	6432	10789	SRSF7	Fly	33967	FBgn0028554	x16	9	8.73	high	Yes	Yes	eggNOG, Hieranoid, Inparanoid, OrthoDB, OrthoFinder, OrthoInspector, orthoMCL, Phylome, TreeFam
ZIC2	7546	12873	ZIC2	Fly	40605	FBgn0003002	opa	9	9	high	Yes	Yes	Hieranoid, Inparanoid, OrthoDB, OrthoFinder, OrthoInspector, orthoMCL, Panther, Phylome, RoundUp
MAP4K4	9448	6866	MAP4K4	Fly	44030	FBgn0010909	msn	9	8.73	moderate	Yes	No	eggNOG, Hieranoid, Inparanoid, OMA, OrthoFinder, OrthoInspector, orthoMCL, Phylome, TreeFam
SLC2A1	6513	11005	SLC2A1	Fly	38109	FBgn0264574	Glut1	10	9.78	moderate	Yes	No	Compara, eggNOG, Hieranoid, Inparanoid, Isobase, OrthoDB, OrthoFinder, OrthoInspector, Phylome, RoundUp
KIDINS220	57498	29508	KIDINS220	Fly	37433	FBgn0261554	CG42672	10	9.77	high	Yes	Yes	Compara, eggNOG, Hieranoid, Homologene, Inparanoid, OMA, OrthoDB, OrthoInspector, Phylome, TreeFam
ATP11C	286410	13554	ATP11C	Fly	32609	FBgn0030746	CG9981	10	9.87	moderate	Yes	No	Compara, Hieranoid, Inparanoid, OMA, OrthoDB, OrthoFinder, orthoMCL, Panther, Phylome, TreeFam
ATP11B	23200	13553	ATP11B	Fly	32610	FBgn0030747	CG4301	10	9.97	moderate	No	Yes	Compara, Hieranoid, Homologene, Inparanoid, OMA, OrthoDB, OrthoFinder, Panther, Phylome, TreeFam
CNTN1	1272	2171	CNTN1	Fly	40553	FBgn0037240	Cont	10	9.69	moderate	Yes	No	Compara, eggNOG, Hieranoid, Inparanoid, OMA, OrthoInspector, orthoMCL, Phylome, RoundUp, TreeFam
KCTD20	222658	21052	KCTD20	Fly	38028	FBgn0035107	mri	10	9.99	moderate	Yes	No	Compara, Hieranoid, Inparanoid, OrthoDB, OrthoFinder, OrthoInspector, Panther, Phylome, RoundUp, TreeFam
DDX20	11218	2743	DDX20	Fly	39195	FBgn0011802	Gem3	10	9.71	high	Yes	Yes	Compara, eggNOG, Hieranoid, OrthoDB, OrthoFinder, OrthoInspector, orthoMCL, Panther, Phylome, TreeFam
WWP2	11060	16804	WWP2	Fly	33379	FBgn0003557	Su(dx)	10	9.69	moderate	Yes	No	Compara, eggNOG, Hieranoid, Inparanoid, OrthoDB, OrthoInspector, orthoMCL, Phylome, RoundUp, TreeFam
JAK1	3716	6190	JAK1	Fly	32080	FBgn0004864	hop	10	9.77	moderate	Yes	No	Compara, eggNOG, Hieranoid, Inparanoid, OMA, OrthoDB, orthoMCL, Panther, Phylome, TreeFam
EPHA2	1969	3386	EPHA2	Fly	43803	FBgn0025936	Eph	10	9.83	moderate	Yes	No	eggNOG, Hieranoid, Inparanoid, OrthoDB, OrthoFinder, OrthoInspector, orthoMCL, Panther, Phylome, TreeFam
CPD	1362	2301	CPD	Fly	30998	FBgn0004648	svr	10	9.76	high	Yes	Yes	eggNOG, Hieranoid, Homologene, Inparanoid, OrthoDB, OrthoInspector, orthoMCL, Phylome, RoundUp, TreeFam
RNF31	55072	16031	RNF31	Fly	33950	FBgn0031857	CG11321	10	9.8	high	Yes	Yes	Compara, eggNOG, Inparanoid, Isobase, OrthoDB, OrthoFinder, OrthoInspector, orthoMCL, Panther, TreeFam
BMPR1A	657	1076	BMPR1A	Fly	33753	FBgn0003716	tkv	10	9.78	moderate	Yes	No	Compara, eggNOG, Inparanoid, OrthoFinder, OrthoInspector, orthoMCL, Panther, Phylome, RoundUp, TreeFam
RBBP7	5931	9890	RBBP7	Fly	41836	FBgn0263979	Caf1-55	10	9.69	moderate	Yes	No	Compara, eggNOG, Isobase, OrthoDB, OrthoFinder, orthoMCL, Panther, Phylome, RoundUp, TreeFam
PAPD7	11044	16705	PAPD7	Fly	42983	FBgn0039251	Trf4-2	10	9.84	moderate	No	Yes	Compara, eggNOG, Inparanoid, Isobase, OrthoDB, OrthoFinder, Panther, Phylome, RoundUp, TreeFam
PKN3	29941	17999	PKN3	Fly	35950	FBgn0020621	Pkn	10	9.74	moderate	Yes	No	Compara, eggNOG, OrthoDB, OrthoFinder, OrthoInspector, orthoMCL, Panther, Phylome, RoundUp, TreeFam
ZC3H18	124245	25091	ZC3H18	Fly	31662	FBgn0029941	CG1677	10	9.8	high	Yes	Yes	Compara, eggNOG, Hieranoid, Inparanoid, Isobase, OMA, OrthoInspector, orthoMCL, Panther, TreeFam
SMAD5	4090	6771	SMAD5	Fly	33529	FBgn0011648	Mad	10	9.81	moderate	Yes	No	eggNOG, Hieranoid, Inparanoid, OMA, OrthoDB, OrthoFinder, OrthoInspector, orthoMCL, Phylome, RoundUp
BCR	613	1014	BCR	Fly	5740235	FBgn0025836	RhoGAP1A	10	9.79	moderate	Yes	No	Compara, eggNOG, Inparanoid, OrthoDB, OrthoInspector, orthoMCL, Panther, Phylome, RoundUp, TreeFam
FIP1L1	81608	19124	FIP1L1	Fly	40569	FBgn0037255	Fip1	10	9.83	high	Yes	Yes	Compara, eggNOG, Hieranoid, OMA, OrthoFinder, OrthoInspector, orthoMCL, Panther, RoundUp, TreeFam
PNN	5411	9162	PNN	Fly	41185	FBgn0037737	Pnn	10	9.74	high	Yes	Yes	Compara, eggNOG, OrthoDB, OrthoFinder, OrthoInspector, orthoMCL, Panther, Phylome, RoundUp, TreeFam
SPEN	23013	17575	SPEN	Fly	44205	FBgn0016977	spen	10	9.8	high	Yes	Yes	Compara, eggNOG, Hieranoid, Inparanoid, Isobase, OrthoDB, OrthoInspector, orthoMCL, Panther, TreeFam
LARP1	23367	29531	LARP1	Fly	53567	FBgn0261618	larp	10	9.89	high	Yes	Yes	Compara, eggNOG, Hieranoid, Inparanoid, OrthoDB, OrthoInspector, Panther, Phylome, RoundUp, TreeFam
CEP78	84131	25740	CEP78	Fly	41775	FBgn0038248	CG7886	10	9.74	high	Yes	Yes	Compara, eggNOG, OrthoDB, OrthoFinder, OrthoInspector, orthoMCL, Panther, Phylome, RoundUp, TreeFam
AAR2	25980	15886	AAR2	Fly	42189	FBgn0038590	CG12320	10	9.98	high	Yes	Yes	Compara, eggNOG, Homologene, Inparanoid, OMA, OrthoFinder, OrthoInspector, Panther, RoundUp, TreeFam
ZMYM2	7750	12989	ZMYM2	Fly	47249	FBgn0010328	woc	10	9.76	moderate	Yes	No	Compara, eggNOG, Hieranoid, Inparanoid, OrthoDB, OrthoInspector, orthoMCL, Panther, Phylome, TreeFam
LAMA1	284217	6481	LAMA1	Fly	43946	FBgn0261563	wb	10	9.99	high	Yes	Yes	Compara, eggNOG, Hieranoid, Inparanoid, OMA, OrthoDB, OrthoInspector, Panther, RoundUp, TreeFam
ATP6V0D1	9114	13724	ATP6V0D1	Fly	31342	FBgn0028665	VhaAC39-1	11	10.85	high	Yes	Yes	eggNOG, Hieranoid, Homologene, Inparanoid, OrthoFinder, OrthoInspector, orthoMCL, Panther, Phylome, RoundUp, TreeFam
ATP11B	23200	13553	ATP11B	Fly	32609	FBgn0030746	CG9981	11	10.82	high	Yes	Yes	Compara, Hieranoid, Inparanoid, Isobase, OMA, OrthoDB, OrthoFinder, orthoMCL, Panther, Phylome, TreeFam
TLDC1	57707	29325	TLDC1	Fly	34013	FBgn0031904	CG5149	11	10.74	high	Yes	Yes	Compara, eggNOG, Hieranoid, OrthoDB, OrthoFinder, OrthoInspector, orthoMCL, Panther, Phylome, RoundUp, TreeFam
PLPP1	8611	9228	PLPP1	Fly	53558	FBgn0041087	wun2	11	10.89	moderate	No	Yes	Compara, Hieranoid, Inparanoid, OrthoDB, OrthoFinder, OrthoInspector, orthoMCL, Panther, Phylome, RoundUp, TreeFam
STOML2	30968	14559	STOML2	Fly	37807	FBgn0034936	CG2970	11	10.88	high	Yes	Yes	Compara, eggNOG, Homologene, Inparanoid, OMA, OrthoFinder, OrthoInspector, orthoMCL, Panther, RoundUp, TreeFam
PSMB5	5693	9542	PSMB5	Fly	318924	FBgn0051742	Prosbeta5R2	11	10.66	moderate	No	Yes	Compara, eggNOG, Hieranoid, Isobase, OrthoDB, OrthoFinder, OrthoInspector, orthoMCL, Panther, Phylome, TreeFam
HCFC1	3054	4839	HCFC1	Fly	43788	FBgn0039904	Hcf	11	10.74	high	Yes	Yes	Compara, eggNOG, Hieranoid, OrthoDB, OrthoFinder, OrthoInspector, orthoMCL, Panther, Phylome, RoundUp, TreeFam
TSC2	7249	12363	TSC2	Fly	40201	FBgn0005198	gig	11	10.96	high	Yes	Yes	eggNOG, Homologene, Inparanoid, OMA, OrthoDB, OrthoFinder, OrthoInspector, orthoMCL, Panther, RoundUp, TreeFam
PPP6R3	55291	1173	PPP6R3	Fly	38714	FBgn0035688	CG10289	11	10.79	high	Yes	Yes	Compara, eggNOG, Inparanoid, OrthoDB, OrthoFinder, OrthoInspector, orthoMCL, Panther, Phylome, RoundUp, TreeFam
SART3	9733	16860	SART3	Fly	31448	FBgn0014024	Rnp4F	11	10.79	high	Yes	Yes	Compara, eggNOG, Hieranoid, Inparanoid, OrthoDB, OrthoInspector, orthoMCL, Panther, Phylome, RoundUp, TreeFam
KCMF1	56888	20589	KCMF1	Fly	41082	FBgn0037655	CG11984	11	10.81	high	Yes	Yes	Compara, eggNOG, Hieranoid, Inparanoid, Isobase, OrthoDB, OrthoFinder, OrthoInspector, Panther, Phylome, TreeFam
NDFIP1	80762	17592	NDFIP1	Fly	326197	FBgn0052177	Ndfip	11	10.89	moderate	Yes	No	Compara, eggNOG, Homologene, Inparanoid, OrthoDB, OrthoFinder, OrthoInspector, Panther, Phylome, RoundUp, TreeFam
KIF16B	55614	15869	KIF16B	Fly	43310	FBgn0004387	Klp98A	11	10.83	high	Yes	Yes	Compara, eggNOG, Inparanoid, Isobase, OrthoDB, OrthoFinder, OrthoInspector, orthoMCL, Panther, RoundUp, TreeFam
GNAS	2778	4392	GNAS	Fly	37805	FBgn0001123	Galphas	11	10.75	moderate	Yes	No	Compara, eggNOG, Homologene, OMA, OrthoDB, OrthoInspector, orthoMCL, Panther, Phylome, RoundUp, TreeFam
RAB9A	9367	9792	RAB9A	Fly	35221	FBgn0032782	Rab9	11	10.8	moderate	Yes	No	Compara, eggNOG, Hieranoid, Isobase, OMA, OrthoDB, OrthoFinder, Panther, Phylome, RoundUp, TreeFam
UBL4A	8266	12505	UBL4A	Fly	3772662	FBgn0038571	CG7215	11	10.79	high	Yes	Yes	Compara, eggNOG, Inparanoid, OMA, OrthoFinder, OrthoInspector, orthoMCL, Panther, Phylome, RoundUp, TreeFam
FANCD2	2177	3585	FANCD2	Fly	2768674	FBgn0038827	Fancd2	11	10.83	high	Yes	Yes	Compara, eggNOG, Hieranoid, Homologene, Inparanoid, OMA, OrthoInspector, orthoMCL, Panther, Phylome, RoundUp
ABCB1	5243	40	ABCB1	Fly	36582	FBgn0010241	Mdr50	11	10.86	high	Yes	Yes	Compara, eggNOG, Hieranoid, Homologene, Inparanoid, Isobase, OrthoFinder, OrthoInspector, orthoMCL, Panther, RoundUp
GTF3C1	2975	4664	GTF3C1	Fly	34753	FBgn0032517	CG7099	11	10.78	high	Yes	Yes	Compara, eggNOG, Hieranoid, Inparanoid, OrthoFinder, OrthoInspector, orthoMCL, Panther, Phylome, RoundUp, TreeFam
NEURL4	84461	34410	NEURL4	Fly	39558	FBgn0283503	Neurl4	11	10.8	high	Yes	Yes	Compara, eggNOG, Hieranoid, Homologene, Inparanoid, OMA, OrthoFinder, OrthoInspector, orthoMCL, Panther, Phylome
PAPD7	11044	16705	PAPD7	Fly	31795	FBgn0030049	Trf4-1	11	10.69	high	Yes	Yes	Compara, eggNOG, Isobase, OrthoDB, OrthoFinder, OrthoInspector, orthoMCL, Panther, Phylome, RoundUp, TreeFam
SNTB2	6645	11169	SNTB2	Fly	40424	FBgn0037130	Syn1	11	10.97	moderate	Yes	No	Hieranoid, Inparanoid, OMA, OrthoDB, OrthoFinder, OrthoInspector, orthoMCL, Panther, Phylome, RoundUp, TreeFam
UTRN	7402	12635	UTRN	Fly	42327	FBgn0260003	Dys	11	10.77	moderate	Yes	No	Compara, eggNOG, Hieranoid, Inparanoid, OMA, OrthoDB, OrthoInspector, orthoMCL, Panther, Phylome, TreeFam
ABR	29	81	ABR	Fly	5740235	FBgn0025836	RhoGAP1A	11	10.79	high	Yes	Yes	Compara, eggNOG, Homologene, Inparanoid, OrthoDB, OrthoInspector, orthoMCL, Panther, Phylome, RoundUp, TreeFam
CAMK2G	818	1463	CAMK2G	Fly	43828	FBgn0264607	CaMKII	11	10.76	moderate	Yes	No	Compara, eggNOG, Hieranoid, Inparanoid, OMA, OrthoFinder, OrthoInspector, orthoMCL, Panther, Phylome, TreeFam
DYRK1A	1859	3091	DYRK1A	Fly	32771	FBgn0259168	mnb	11	10.69	high	Yes	Yes	Compara, eggNOG, Hieranoid, Inparanoid, OrthoDB, OrthoFinder, OrthoInspector, orthoMCL, Phylome, RoundUp, TreeFam
U2SURP	23350	30855	U2SURP	Fly	37381	FBgn0034572	CG9346	11	10.88	high	Yes	Yes	Compara, eggNOG, Homologene, Inparanoid, OMA, OrthoFinder, OrthoInspector, orthoMCL, Panther, RoundUp, TreeFam
POLDIP2	26073	23781	POLDIP2	Fly	40655	FBgn0037329	POLDIP2	11	11.04	high	Yes	Yes	Compara, Hieranoid, Homologene, Inparanoid, OMA, OrthoDB, OrthoFinder, OrthoInspector, Panther, Phylome, RoundUp
ESYT2	57488	22211	ESYT2	Fly	42929	FBgn0266758	Esyt2	11	10.88	moderate	Yes	No	Compara, Hieranoid, Homologene, Inparanoid, OrthoFinder, OrthoInspector, orthoMCL, Panther, Phylome, RoundUp, TreeFam
VPS11	55823	14583	VPS11	Fly	317987	FBgn0052350	Vps11	11	10.89	high	Yes	Yes	Compara, Hieranoid, Inparanoid, Isobase, OMA, OrthoDB, OrthoInspector, orthoMCL, Panther, Phylome, RoundUp
FMNL3	91010	23698	FMNL3	Fly	39561	FBgn0267795	Frl	11	10.79	moderate	Yes	No	Compara, eggNOG, Hieranoid, Inparanoid, OMA, OrthoFinder, orthoMCL, Panther, Phylome, RoundUp, TreeFam
CHERP	10523	16930	CHERP	Fly	3346235	FBgn0261872	scaf6	11	10.78	high	Yes	Yes	Compara, eggNOG, Hieranoid, Inparanoid, OrthoFinder, OrthoInspector, orthoMCL, Panther, Phylome, RoundUp, TreeFam
DTNA	1837	3057	DTNA	Fly	36362	FBgn0033739	Dyb	11	10.66	moderate	Yes	No	Compara, eggNOG, Hieranoid, Inparanoid, Isobase, OMA, OrthoDB, OrthoFinder, OrthoInspector, orthoMCL, Phylome
WDR33	55339	25651	WDR33	Fly	40698	FBgn0046222	CG1109	11	10.74	high	Yes	Yes	Compara, eggNOG, Hieranoid, OrthoDB, OrthoFinder, OrthoInspector, orthoMCL, Panther, Phylome, RoundUp, TreeFam
FLOT2	2319	3758	FLOT2	Fly	32425	FBgn0264078	Flo2	12	11.78	high	Yes	Yes	Compara, eggNOG, Hieranoid, Homologene, Inparanoid, OrthoFinder, OrthoInspector, orthoMCL, Panther, Phylome, RoundUp, TreeFam
ZSWIM8	23053	23528	ZSWIM8	Fly	50356	FBgn0085430	CG34401	12	11.79	high	Yes	Yes	Compara, eggNOG, Hieranoid, Inparanoid, OMA, OrthoFinder, OrthoInspector, orthoMCL, Panther, Phylome, RoundUp, TreeFam
POLR2A	5430	9187	POLR2A	Fly	32100	FBgn0003277	RpII215	12	11.8	high	Yes	Yes	eggNOG, Hieranoid, Homologene, Inparanoid, Isobase, OrthoFinder, OrthoInspector, orthoMCL, Panther, Phylome, RoundUp, TreeFam
PSMB5	5693	9542	PSMB5	Fly	37690	FBgn0034842	Prosbeta5R1	12	11.73	moderate	No	Yes	Compara, eggNOG, Hieranoid, Inparanoid, Isobase, OrthoFinder, OrthoInspector, orthoMCL, Panther, Phylome, RoundUp, TreeFam
FARP2	9855	16460	FARP2	Fly	40608	FBgn0265082	Cdep	12	11.68	high	Yes	Yes	Compara, eggNOG, Hieranoid, Homologene, Isobase, OrthoFinder, OrthoInspector, orthoMCL, Panther, Phylome, RoundUp, TreeFam
WWP1	11059	17004	WWP1	Fly	33379	FBgn0003557	Su(dx)	12	11.76	moderate	Yes	No	Compara, eggNOG, Hieranoid, Homologene, Inparanoid, OrthoDB, OrthoFinder, OrthoInspector, orthoMCL, Panther, Phylome, TreeFam
RANBP9	10048	13727	RANBP9	Fly	36102	FBgn0262114	RanBPM	12	11.79	high	Yes	Yes	Compara, eggNOG, Hieranoid, Homologene, Inparanoid, OrthoDB, OrthoInspector, orthoMCL, Panther, Phylome, RoundUp, TreeFam
SETD1A	9739	29010	SETD1A	Fly	3354971	FBgn0040022	Set1	12	11.69	high	Yes	Yes	Compara, eggNOG, Hieranoid, Isobase, OrthoDB, OrthoFinder, OrthoInspector, orthoMCL, Panther, Phylome, RoundUp, TreeFam
PEX1	5189	8850	PEX1	Fly	45460	FBgn0013563	Pex1	12	11.79	high	Yes	Yes	Compara, eggNOG, Hieranoid, Inparanoid, OrthoDB, OrthoFinder, OrthoInspector, orthoMCL, Panther, Phylome, RoundUp, TreeFam
WDR6	11180	12758	WDR6	Fly	32526	FBgn0053172	CG33172	12	11.79	high	Yes	Yes	Compara, eggNOG, Homologene, Inparanoid, OrthoDB, OrthoFinder, OrthoInspector, orthoMCL, Panther, Phylome, RoundUp, TreeFam
PSMD8	5714	9566	PSMD8	Fly	2768973	FBgn0036465	Rpn12R	12	11.69	moderate	No	Yes	Compara, eggNOG, Hieranoid, Isobase, OrthoDB, OrthoFinder, OrthoInspector, orthoMCL, Panther, Phylome, RoundUp, TreeFam
PSMB2	5690	9539	PSMB2	Fly	33451	FBgn0031443	Prosbeta4R2	12	11.71	moderate	No	Yes	Compara, eggNOG, Hieranoid, Inparanoid, Isobase, OrthoDB, OrthoFinder, OrthoInspector, orthoMCL, Panther, Phylome, TreeFam
ATM	472	795	ATM	Fly	41839	FBgn0045035	tefu	12	11.74	high	Yes	Yes	Compara, eggNOG, Hieranoid, Inparanoid, Isobase, OrthoDB, OrthoInspector, orthoMCL, Panther, Phylome, RoundUp, TreeFam
NF1	4763	7765	NF1	Fly	43149	FBgn0015269	Nf1	12	11.89	high	Yes	Yes	Compara, eggNOG, Homologene, Inparanoid, OMA, OrthoDB, OrthoFinder, OrthoInspector, orthoMCL, Panther, RoundUp, TreeFam
SUGT1	10910	16987	SUGT1	Fly	40982	FBgn0265101	Sgt1	12	11.78	high	Yes	Yes	Compara, eggNOG, Hieranoid, Homologene, Inparanoid, OrthoFinder, OrthoInspector, orthoMCL, Panther, Phylome, RoundUp, TreeFam
PTPRS	5802	9681	PTPRS	Fly	35259	FBgn0000464	Lar	12	11.7	moderate	Yes	No	Compara, eggNOG, Hieranoid, Inparanoid, OMA, OrthoDB, OrthoFinder, OrthoInspector, orthoMCL, Phylome, RoundUp, TreeFam
MYO6	4646	7605	MYO6	Fly	42889	FBgn0011225	jar	12	11.83	high	Yes	Yes	Compara, eggNOG, Hieranoid, Homologene, Inparanoid, Isobase, OrthoFinder, OrthoInspector, Panther, Phylome, RoundUp, TreeFam
PI4KA	5297	8983	PI4KA	Fly	31247	FBgn0267350	PI4KIIIalpha	12	11.94	high	Yes	Yes	Compara, Hieranoid, Homologene, Inparanoid, OMA, OrthoDB, OrthoFinder, OrthoInspector, orthoMCL, Panther, Phylome, RoundUp
CAND2	23066	30689	CAND2	Fly	34403	FBgn0027568	Cand1	12	11.79	moderate	Yes	No	Compara, eggNOG, Hieranoid, Inparanoid, OrthoDB, OrthoFinder, OrthoInspector, orthoMCL, Panther, Phylome, RoundUp, TreeFam
KDM5C	8242	11114	KDM5C	Fly	33837	FBgn0031759	lid	12	11.87	moderate	Yes	No	eggNOG, Hieranoid, Inparanoid, OMA, OrthoDB, OrthoFinder, OrthoInspector, orthoMCL, Panther, Phylome, RoundUp, TreeFam
ZC3H14	79882	20509	ZC3H14	Fly	42897	FBgn0028471	Nab2	12	11.8	high	Yes	Yes	Compara, eggNOG, Inparanoid, OMA, OrthoDB, OrthoFinder, OrthoInspector, orthoMCL, Panther, Phylome, RoundUp, TreeFam
WDR75	84128	25725	WDR75	Fly	35374	FBgn0284251	l(2)05287	12	11.78	high	Yes	Yes	Compara, eggNOG, Hieranoid, Homologene, Inparanoid, OrthoFinder, OrthoInspector, orthoMCL, Panther, Phylome, RoundUp, TreeFam
NEDD4	4734	7727	NEDD4	Fly	39958	FBgn0259174	Nedd4	12	11.8	moderate	Yes	No	Compara, eggNOG, Hieranoid, Inparanoid, OMA, OrthoDB, OrthoInspector, orthoMCL, Panther, Phylome, RoundUp, TreeFam
RNPS1	10921	10080	RNPS1	Fly	41147	FBgn0037707	RnpS1	12	11.89	high	Yes	Yes	Compara, eggNOG, Hieranoid, Inparanoid, OMA, OrthoDB, OrthoFinder, OrthoInspector, orthoMCL, Panther, RoundUp, TreeFam
CCNT1	904	1599	CCNT1	Fly	39961	FBgn0025455	CycT	12	11.74	high	Yes	Yes	Compara, eggNOG, Inparanoid, Isobase, OrthoDB, OrthoFinder, OrthoInspector, orthoMCL, Panther, Phylome, RoundUp, TreeFam
ZCCHC8	55596	25265	ZCCHC8	Fly	37919	FBgn0035021	CG4622	12	11.74	high	Yes	Yes	Compara, eggNOG, Inparanoid, Isobase, OrthoDB, OrthoFinder, OrthoInspector, orthoMCL, Panther, Phylome, RoundUp, TreeFam
SART1	9092	10538	SART1	Fly	34608	FBgn0032388	CG6686	12	11.8	high	Yes	Yes	Compara, eggNOG, Hieranoid, Inparanoid, OMA, OrthoDB, OrthoInspector, orthoMCL, Panther, Phylome, RoundUp, TreeFam
WDR36	134430	30696	WDR36	Fly	41647	FBgn0038146	CG9799	12	11.76	high	Yes	Yes	Compara, eggNOG, Hieranoid, Homologene, Inparanoid, OMA, OrthoFinder, OrthoInspector, orthoMCL, Panther, Phylome, TreeFam
RBM15	64783	14959	RBM15	Fly	35756	FBgn0027548	nito	12	11.84	high	Yes	Yes	Compara, eggNOG, Hieranoid, Inparanoid, OMA, OrthoDB, OrthoFinder, OrthoInspector, orthoMCL, Panther, Phylome, RoundUp
PARD3	56288	16051	PARD3	Fly	32703	FBgn0000163	baz	12	11.81	high	Yes	Yes	eggNOG, Hieranoid, Inparanoid, Isobase, OMA, OrthoFinder, OrthoInspector, orthoMCL, Panther, Phylome, RoundUp, TreeFam
SLC25A17	10478	10987	SLC25A17	Fly	38532	FBgn0052250	PMP34	12	11.83	high	Yes	Yes	Compara, eggNOG, Homologene, Inparanoid, Isobase, OMA, OrthoFinder, OrthoInspector, orthoMCL, Panther, RoundUp, TreeFam
DMD	1756	2928	DMD	Fly	42327	FBgn0260003	Dys	12	11.79	high	Yes	Yes	Compara, eggNOG, Hieranoid, Homologene, Inparanoid, OMA, OrthoInspector, orthoMCL, Panther, Phylome, RoundUp, TreeFam
TNIK	23043	30765	TNIK	Fly	44030	FBgn0010909	msn	12	11.7	high	Yes	Yes	Compara, eggNOG, Hieranoid, Inparanoid, OMA, OrthoDB, OrthoFinder, OrthoInspector, orthoMCL, Phylome, RoundUp, TreeFam
RBM15B	29890	24303	RBM15B	Fly	35756	FBgn0027548	nito	12	11.8	high	Yes	Yes	Compara, eggNOG, Hieranoid, Inparanoid, OMA, OrthoDB, OrthoInspector, orthoMCL, Panther, Phylome, RoundUp, TreeFam
NID1	4811	7821	NID1	Fly	36089	FBgn0026403	Ndg	12	11.65	high	Yes	Yes	Compara, eggNOG, Hieranoid, Inparanoid, Isobase, OMA, OrthoDB, OrthoInspector, orthoMCL, Phylome, RoundUp, TreeFam
LAMA5	3911	6485	LAMA5	Fly	38723	FBgn0002526	LanA	12	11.77	high	Yes	Yes	eggNOG, Hieranoid, Homologene, Inparanoid, OMA, OrthoDB, OrthoFinder, OrthoInspector, orthoMCL, Phylome, RoundUp, TreeFam
LAMC1	3915	6492	LAMC1	Fly	39118	FBgn0267348	LanB2	12	11.83	high	Yes	Yes	Compara, eggNOG, Hieranoid, Homologene, Inparanoid, OrthoDB, OrthoFinder, OrthoInspector, orthoMCL, Panther, Phylome, RoundUp
HADHB	3032	4803	HADHB	Fly	37784	FBgn0025352	Thiolase	12	11.83	high	Yes	Yes	Compara, eggNOG, Homologene, Inparanoid, Isobase, OMA, OrthoFinder, OrthoInspector, orthoMCL, Panther, RoundUp, TreeFam
BTBD10	84280	21445	BTBD10	Fly	38028	FBgn0035107	mri	13	12.74	high	Yes	Yes	Compara, eggNOG, Hieranoid, Inparanoid, Isobase, OrthoDB, OrthoFinder, OrthoInspector, orthoMCL, Panther, Phylome, RoundUp, TreeFam
KIAA2013	90231	28513	KIAA2013	Fly	33372	FBgn0031379	CG7289	13	12.79	high	Yes	Yes	Compara, eggNOG, Hieranoid, Homologene, Inparanoid, OrthoDB, OrthoFinder, OrthoInspector, orthoMCL, Panther, Phylome, RoundUp, TreeFam
ATP6V0C	527	855	ATP6V0C	Fly	44307	FBgn0262736	Vha16-1	13	12.77	moderate	No	Yes	Compara, eggNOG, Hieranoid, Homologene, Inparanoid, OMA, OrthoDB, OrthoFinder, OrthoInspector, orthoMCL, Panther, Phylome, TreeFam
HERC2	8924	4868	HERC2	Fly	33035	FBgn0031107	HERC2	13	12.9	high	Yes	Yes	Compara, eggNOG, Hieranoid, Homologene, Inparanoid, OMA, OrthoDB, OrthoFinder, OrthoInspector, Panther, Phylome, RoundUp, TreeFam
BAG6	7917	13919	BAG6	Fly	38844	FBgn0035793	CG7546	13	12.8	high	Yes	Yes	Compara, eggNOG, Hieranoid, Inparanoid, OMA, OrthoDB, OrthoFinder, OrthoInspector, orthoMCL, Panther, Phylome, RoundUp, TreeFam
ITCH	83737	13890	ITCH	Fly	33379	FBgn0003557	Su(dx)	13	12.74	high	Yes	Yes	Compara, eggNOG, Hieranoid, Inparanoid, Isobase, OrthoDB, OrthoFinder, OrthoInspector, orthoMCL, Panther, Phylome, RoundUp, TreeFam
FLNC	2318	3756	FLNC	Fly	42066	FBgn0014141	cher	13	12.8	moderate	Yes	No	Compara, eggNOG, Hieranoid, Inparanoid, OMA, OrthoDB, OrthoFinder, OrthoInspector, orthoMCL, Panther, Phylome, RoundUp, TreeFam
PSMD1	5707	9554	PSMD1	Fly	43449	FBgn0028692	Rpn2	13	12.79	high	Yes	Yes	Compara, eggNOG, Hieranoid, Homologene, Inparanoid, OMA, OrthoFinder, OrthoInspector, orthoMCL, Panther, Phylome, RoundUp, TreeFam
PSMD3	5709	9560	PSMD3	Fly	35176	FBgn0261396	Rpn3	13	12.9	high	Yes	Yes	Compara, eggNOG, Hieranoid, Homologene, Inparanoid, OMA, OrthoDB, OrthoFinder, OrthoInspector, Panther, Phylome, RoundUp, TreeFam
HUWE1	10075	30892	HUWE1	Fly	32510	FBgn0030674	CG8184	13	12.79	high	Yes	Yes	Compara, eggNOG, Hieranoid, Homologene, Inparanoid, OMA, OrthoFinder, OrthoInspector, orthoMCL, Panther, Phylome, RoundUp, TreeFam
HDAC2	3066	4853	HDAC2	Fly	38565	FBgn0015805	HDAC1	13	12.8	moderate	Yes	No	Compara, eggNOG, Hieranoid, Inparanoid, OMA, OrthoDB, OrthoFinder, OrthoInspector, orthoMCL, Panther, Phylome, RoundUp, TreeFam
ANKRD13A	88455	21268	ANKRD13A	Fly	37199	FBgn0034418	CG15118	13	12.8	moderate	Yes	No	Compara, eggNOG, Hieranoid, Inparanoid, OMA, OrthoDB, OrthoFinder, OrthoInspector, orthoMCL, Panther, Phylome, RoundUp, TreeFam
BAG2	9532	938	BAG2	Fly	39679	FBgn0036505	CG7945	13	12.9	high	Yes	Yes	Compara, Hieranoid, Homologene, Inparanoid, OMA, OrthoDB, OrthoFinder, OrthoInspector, orthoMCL, Panther, Phylome, RoundUp, TreeFam
FANCI	55215	25568	FANCI	Fly	35895	FBgn0033354	FANCI	13	12.77	high	Yes	Yes	Compara, eggNOG, Hieranoid, Homologene, Inparanoid, OMA, OrthoDB, OrthoFinder, OrthoInspector, orthoMCL, Panther, Phylome, TreeFam
MMS19	64210	13824	MMS19	Fly	40626	FBgn0037301	Mms19	13	12.8	high	Yes	Yes	Compara, eggNOG, Hieranoid, Inparanoid, OMA, OrthoDB, OrthoFinder, OrthoInspector, orthoMCL, Panther, Phylome, RoundUp, TreeFam
IPO4	79711	19426	IPO4	Fly	59216	FBgn0042178	CG32165	13	12.77	moderate	No	Yes	Compara, eggNOG, Hieranoid, Homologene, Inparanoid, OMA, OrthoDB, OrthoFinder, OrthoInspector, orthoMCL, Panther, Phylome, TreeFam
PTPRF	5792	9670	PTPRF	Fly	35259	FBgn0000464	Lar	13	12.8	moderate	Yes	No	Compara, eggNOG, Hieranoid, Inparanoid, OMA, OrthoDB, OrthoFinder, OrthoInspector, orthoMCL, Panther, Phylome, RoundUp, TreeFam
SMC4	10051	14013	SMC4	Fly	35001	FBgn0015391	glu	13	12.79	high	Yes	Yes	Compara, eggNOG, Hieranoid, Homologene, Inparanoid, OMA, OrthoFinder, OrthoInspector, orthoMCL, Panther, Phylome, RoundUp, TreeFam
SLC20A1	6574	10946	SLC20A1	Fly	39255	FBgn0260795	NaPi-III	13	12.85	high	Yes	Yes	Compara, eggNOG, Hieranoid, Inparanoid, Isobase, OMA, OrthoDB, OrthoFinder, OrthoInspector, Panther, Phylome, RoundUp, TreeFam
MON2	23041	29177	MON2	Fly	326157	FBgn0031985	mon2	13	12.9	high	Yes	Yes	Compara, eggNOG, Hieranoid, Homologene, Inparanoid, OMA, OrthoDB, OrthoFinder, OrthoInspector, Panther, Phylome, RoundUp, TreeFam
ABCA3	21	33	ABCA3	Fly	39971	FBgn0036747	CG6052	13	12.72	moderate	No	Yes	Compara, eggNOG, Hieranoid, Inparanoid, Isobase, OMA, OrthoDB, OrthoFinder, OrthoInspector, orthoMCL, Panther, Phylome, TreeFam
BAT3	7917	13919	BAG6	Fly	38844	FBgn0035793	CG7546	13	12.8	high	Yes	Yes	Compara, eggNOG, Hieranoid, Inparanoid, OMA, OrthoDB, OrthoFinder, OrthoInspector, orthoMCL, Panther, Phylome, RoundUp, TreeFam
GTF3C3	9330	4666	GTF3C3	Fly	36921	FBgn0034186	CG8950	13	12.9	high	Yes	Yes	Compara, Hieranoid, Homologene, Inparanoid, OMA, OrthoDB, OrthoFinder, OrthoInspector, orthoMCL, Panther, Phylome, RoundUp, TreeFam
CHAF1B	8208	1911	CHAF1B	Fly	36107	FBgn0033526	Caf1-105	13	12.79	high	Yes	Yes	Compara, eggNOG, Hieranoid, Homologene, Inparanoid, OrthoDB, OrthoFinder, OrthoInspector, orthoMCL, Panther, Phylome, RoundUp, TreeFam
WDHD1	11169	23170	WDHD1	Fly	36551	FBgn0033890	Ctf4	13	12.79	high	Yes	Yes	Compara, eggNOG, Hieranoid, Homologene, Inparanoid, OMA, OrthoFinder, OrthoInspector, orthoMCL, Panther, Phylome, RoundUp, TreeFam
C2CD5	9847	29062	C2CD5	Fly	42904	FBgn0039187	CG6454	13	12.7	high	Yes	Yes	Compara, eggNOG, Hieranoid, Homologene, Inparanoid, OMA, OrthoDB, OrthoFinder, OrthoInspector, orthoMCL, Phylome, RoundUp, TreeFam
SLIT2	9353	11086	SLIT2	Fly	36746	FBgn0264089	sli	13	12.79	moderate	Yes	No	Compara, eggNOG, Hieranoid, Homologene, Inparanoid, OMA, OrthoFinder, OrthoInspector, orthoMCL, Panther, Phylome, RoundUp, TreeFam
TTC37	9652	23639	TTC37	Fly	35921	FBgn0033376	CG8777	13	12.8	high	Yes	Yes	Compara, eggNOG, Hieranoid, Homologene, Inparanoid, OMA, OrthoDB, OrthoInspector, orthoMCL, Panther, Phylome, RoundUp, TreeFam
PRPF40A	55660	16463	PRPF40A	Fly	33513	FBgn0031492	CG3542	13	12.8	moderate	Yes	No	Compara, eggNOG, Hieranoid, Inparanoid, OMA, OrthoDB, OrthoFinder, OrthoInspector, orthoMCL, Panther, Phylome, RoundUp, TreeFam
SRSF1	6426	10780	SRSF1	Fly	53443	FBgn0283477	SF2	13	12.79	high	Yes	Yes	Compara, eggNOG, Hieranoid, Homologene, Inparanoid, OMA, OrthoFinder, OrthoInspector, orthoMCL, Panther, Phylome, RoundUp, TreeFam
CDK9	1025	1780	CDK9	Fly	37586	FBgn0019949	Cdk9	13	12.87	high	Yes	Yes	eggNOG, Hieranoid, Homologene, Inparanoid, OMA, OrthoDB, OrthoFinder, OrthoInspector, orthoMCL, Panther, Phylome, RoundUp, TreeFam
LPIN1	23175	13345	LPIN1	Fly	35790	FBgn0263593	Lpin	13	12.8	moderate	Yes	No	Compara, eggNOG, Hieranoid, Inparanoid, OMA, OrthoDB, OrthoFinder, OrthoInspector, orthoMCL, Panther, Phylome, RoundUp, TreeFam
CWC27	10283	10664	CWC27	Fly	39331	FBgn0036207	CG10907	13	12.77	high	Yes	Yes	Compara, eggNOG, Hieranoid, Homologene, Inparanoid, OMA, OrthoDB, OrthoFinder, OrthoInspector, orthoMCL, Panther, Phylome, TreeFam
GPATCH1	55094	24658	GPATCH1	Fly	39535	FBgn0036386	CG8833	13	12.8	high	Yes	Yes	Compara, eggNOG, Hieranoid, Inparanoid, OMA, OrthoDB, OrthoFinder, OrthoInspector, orthoMCL, Panther, Phylome, RoundUp, TreeFam
MCM7	4176	6950	MCM7	Fly	39014	FBgn0020633	Mcm7	13	12.79	high	Yes	Yes	Compara, eggNOG, Hieranoid, Homologene, Inparanoid, OMA, OrthoFinder, OrthoInspector, orthoMCL, Panther, Phylome, RoundUp, TreeFam
IK	3550	5958	IK	Fly	41091	FBgn0037660	beag	13	12.87	high	Yes	Yes	eggNOG, Hieranoid, Homologene, Inparanoid, OMA, OrthoDB, OrthoFinder, OrthoInspector, orthoMCL, Panther, Phylome, RoundUp, TreeFam
MCM3	4172	6945	MCM3	Fly	31449	FBgn0024332	Mcm3	13	12.79	high	Yes	Yes	Compara, eggNOG, Hieranoid, Homologene, Inparanoid, OMA, OrthoFinder, OrthoInspector, orthoMCL, Panther, Phylome, RoundUp, TreeFam
HTRA2	27429	14348	HTRA2	Fly	41756	FBgn0038233	HtrA2	13	12.8	high	Yes	Yes	Compara, eggNOG, Homologene, Inparanoid, OMA, OrthoDB, OrthoFinder, OrthoInspector, orthoMCL, Panther, Phylome, RoundUp, TreeFam
FMNL2	114793	18267	FMNL2	Fly	39561	FBgn0267795	Frl	13	12.9	high	Yes	Yes	Compara, eggNOG, Hieranoid, Homologene, Inparanoid, OMA, OrthoDB, OrthoFinder, OrthoInspector, Panther, Phylome, RoundUp, TreeFam
RBBP6	5930	9889	RBBP6	Fly	37857	FBgn0086129	snama	13	12.74	high	Yes	Yes	Compara, eggNOG, Hieranoid, Inparanoid, Isobase, OrthoDB, OrthoFinder, OrthoInspector, orthoMCL, Panther, Phylome, RoundUp, TreeFam
IARS2	55699	29685	IARS2	Fly	39762	FBgn0036569	IleRS-m	13	12.82	high	Yes	Yes	Compara, eggNOG, Hieranoid, Homologene, Inparanoid, Isobase, OMA, OrthoDB, OrthoFinder, OrthoInspector, Panther, Phylome, TreeFam
TBC1D9B	23061	29097	TBC1D9B	Fly	40361	FBgn0037074	CG7324	13	12.8	moderate	Yes	No	Compara, eggNOG, Hieranoid, Inparanoid, OMA, OrthoDB, OrthoFinder, OrthoInspector, orthoMCL, Panther, Phylome, RoundUp, TreeFam
TSG101	7251	15971	TSG101	Fly	39881	FBgn0036666	TSG101	13	12.79	high	Yes	Yes	Compara, eggNOG, Hieranoid, Homologene, Inparanoid, OMA, OrthoFinder, OrthoInspector, orthoMCL, Panther, Phylome, RoundUp, TreeFam
MYO5A	4644	7602	MYO5A	Fly	35680	FBgn0261397	didum	13	12.79	high	Yes	Yes	Compara, eggNOG, Hieranoid, Homologene, Inparanoid, OMA, OrthoFinder, OrthoInspector, orthoMCL, Panther, Phylome, RoundUp, TreeFam
SMURF1	57154	16807	SMURF1	Fly	36999	FBgn0029006	Smurf	13	12.8	moderate	Yes	No	Compara, eggNOG, Hieranoid, Inparanoid, OMA, OrthoDB, OrthoFinder, OrthoInspector, orthoMCL, Panther, Phylome, RoundUp, TreeFam
ATP6V0A1	535	865	ATP6V0A1	Fly	43442	FBgn0028671	Vha100-1	14	13.82	high	Yes	Yes	eggNOG, Hieranoid, Homologene, Inparanoid, Isobase, OMA, OrthoDB, OrthoFinder, OrthoInspector, orthoMCL, Panther, Phylome, RoundUp, TreeFam
ATP6V1C1	528	856	ATP6V1C1	Fly	36826	FBgn0262511	Vha44	14	13.74	high	Yes	Yes	Compara, eggNOG, Hieranoid, Homologene, Inparanoid, Isobase, OrthoDB, OrthoFinder, OrthoInspector, orthoMCL, Panther, Phylome, RoundUp, TreeFam
STUB1	10273	11427	STUB1	Fly	34433	FBgn0027052	STUB1	14	13.74	high	Yes	Yes	Compara, eggNOG, Hieranoid, Homologene, Inparanoid, Isobase, OMA, OrthoFinder, OrthoInspector, orthoMCL, Panther, Phylome, RoundUp, TreeFam
ATP6V1F	9296	16832	ATP6V1F	Fly	36731	FBgn0262512	Vha14-1	14	13.8	high	Yes	Yes	Compara, eggNOG, Hieranoid, Homologene, Inparanoid, OMA, OrthoDB, OrthoFinder, OrthoInspector, orthoMCL, Panther, Phylome, RoundUp, TreeFam
ATP6V1A	523	851	ATP6V1A	Fly	45012	FBgn0263598	Vha68-2	14	13.75	high	Yes	Yes	Compara, eggNOG, Hieranoid, Inparanoid, Isobase, OMA, OrthoDB, OrthoFinder, OrthoInspector, orthoMCL, Panther, Phylome, RoundUp, TreeFam
ATP6V1A	523	851	ATP6V1A	Fly	45668	FBgn0265262	Vha68-1	14	13.72	high	Yes	Yes	Compara, eggNOG, Hieranoid, Homologene, Inparanoid, Isobase, OMA, OrthoDB, OrthoFinder, OrthoInspector, orthoMCL, Panther, Phylome, TreeFam
ATP6V0C	527	855	ATP6V0C	Fly	317846	FBgn0028667	Vha16-3	14	13.72	high	Yes	Yes	Compara, eggNOG, Hieranoid, Homologene, Inparanoid, Isobase, OMA, OrthoDB, OrthoFinder, OrthoInspector, orthoMCL, Panther, Phylome, TreeFam
SLC12A2	6558	10911	SLC12A2	Fly	39410	FBgn0036279	Ncc69	14	13.75	high	Yes	Yes	Compara, eggNOG, Hieranoid, Homologene, Inparanoid, Isobase, OMA, OrthoDB, OrthoInspector, orthoMCL, Panther, Phylome, RoundUp, TreeFam
LTN1	26046	13082	LTN1	Fly	40127	FBgn0262517	Ltn1	14	13.75	high	Yes	Yes	Compara, eggNOG, Hieranoid, Inparanoid, Isobase, OMA, OrthoDB, OrthoFinder, OrthoInspector, orthoMCL, Panther, Phylome, RoundUp, TreeFam
NEDD4L	23327	7728	NEDD4L	Fly	39958	FBgn0259174	Nedd4	14	13.8	high	Yes	Yes	Compara, eggNOG, Hieranoid, Homologene, Inparanoid, OMA, OrthoDB, OrthoFinder, OrthoInspector, orthoMCL, Panther, Phylome, RoundUp, TreeFam
TUBGCP2	10844	18599	TUBGCP2	Fly	32946	FBgn0026430	Grip84	14	13.75	high	Yes	Yes	Compara, eggNOG, Hieranoid, Homologene, Inparanoid, Isobase, OMA, OrthoDB, OrthoInspector, orthoMCL, Panther, Phylome, RoundUp, TreeFam
CPSF1	29894	2324	CPSF1	Fly	44250	FBgn0024698	Cpsf160	14	13.82	high	Yes	Yes	eggNOG, Hieranoid, Homologene, Inparanoid, Isobase, OMA, OrthoDB, OrthoFinder, OrthoInspector, orthoMCL, Panther, Phylome, RoundUp, TreeFam
SMU1	55234	18247	SMU1	Fly	42272	FBgn0038666	Smu1	14	13.8	high	Yes	Yes	Compara, eggNOG, Hieranoid, Homologene, Inparanoid, OMA, OrthoDB, OrthoFinder, OrthoInspector, orthoMCL, Panther, Phylome, RoundUp, TreeFam
PSMB2	5690	9539	PSMB2	Fly	34999	FBgn0032596	Prosbeta4	14	13.8	high	Yes	Yes	Compara, eggNOG, Hieranoid, Homologene, Inparanoid, OMA, OrthoDB, OrthoFinder, OrthoInspector, orthoMCL, Panther, Phylome, RoundUp, TreeFam
GET4	51608	21690	GET4	Fly	40557	FBgn0086605	CG9853	14	13.8	high	Yes	Yes	Compara, eggNOG, Hieranoid, Homologene, Inparanoid, OMA, OrthoDB, OrthoFinder, OrthoInspector, orthoMCL, Panther, Phylome, RoundUp, TreeFam
IPO9	55705	19425	IPO9	Fly	41367	FBgn0037894	Ranbp9	14	13.8	high	Yes	Yes	Compara, eggNOG, Hieranoid, Homologene, Inparanoid, OMA, OrthoDB, OrthoFinder, OrthoInspector, orthoMCL, Panther, Phylome, RoundUp, TreeFam
IPO4	79711	19426	IPO4	Fly	59215	FBgn0042177	CG32164	14	13.8	high	Yes	Yes	Compara, eggNOG, Hieranoid, Homologene, Inparanoid, OMA, OrthoDB, OrthoFinder, OrthoInspector, orthoMCL, Panther, Phylome, RoundUp, TreeFam
SMC2	10592	14011	SMC2	Fly	36653	FBgn0027783	SMC2	14	13.8	high	Yes	Yes	Compara, eggNOG, Hieranoid, Homologene, Inparanoid, OMA, OrthoDB, OrthoFinder, OrthoInspector, orthoMCL, Panther, Phylome, RoundUp, TreeFam
CAD	790	1424	CAD	Fly	32640	FBgn0003189	r	14	13.74	high	Yes	Yes	Compara, eggNOG, Hieranoid, Homologene, Inparanoid, Isobase, OrthoDB, OrthoFinder, OrthoInspector, orthoMCL, Panther, Phylome, RoundUp, TreeFam
PELO	53918	8829	PELO	Fly	34286	FBgn0011207	pelo	14	13.8	high	Yes	Yes	Compara, eggNOG, Hieranoid, Homologene, Inparanoid, OMA, OrthoDB, OrthoFinder, OrthoInspector, orthoMCL, Panther, Phylome, RoundUp, TreeFam
PSMD2	5708	9559	PSMD2	Fly	40174	FBgn0028695	Rpn1	14	13.8	high	Yes	Yes	Compara, eggNOG, Hieranoid, Homologene, Inparanoid, OMA, OrthoDB, OrthoFinder, OrthoInspector, orthoMCL, Panther, Phylome, RoundUp, TreeFam
PMPCB	9512	9119	PMPCB	Fly	41800	FBgn0038271	UQCR-C1	14	13.74	high	Yes	Yes	Compara, eggNOG, Hieranoid, Homologene, Inparanoid, Isobase, OMA, OrthoFinder, OrthoInspector, orthoMCL, Panther, Phylome, RoundUp, TreeFam
VPRBP	9730	30911	DCAF1	Fly	37462	FBgn0034641	mahj	14	13.8	high	Yes	Yes	Compara, eggNOG, Hieranoid, Homologene, Inparanoid, OMA, OrthoDB, OrthoFinder, OrthoInspector, orthoMCL, Panther, Phylome, RoundUp, TreeFam
ECD	11319	17029	ECD	Fly	38291	FBgn0000543	ecd	14	13.8	high	Yes	Yes	Compara, eggNOG, Hieranoid, Homologene, Inparanoid, OMA, OrthoDB, OrthoFinder, OrthoInspector, orthoMCL, Panther, Phylome, RoundUp, TreeFam
USP5	8078	12628	USP5	Fly	38375	FBgn0035402	Usp5	14	13.8	high	Yes	Yes	Compara, eggNOG, Hieranoid, Homologene, Inparanoid, OMA, OrthoDB, OrthoFinder, OrthoInspector, orthoMCL, Panther, Phylome, RoundUp, TreeFam
NCBP1	4686	7658	NCBP1	Fly	44409	FBgn0022942	Cbp80	14	13.8	high	Yes	Yes	Compara, eggNOG, Hieranoid, Homologene, Inparanoid, OMA, OrthoDB, OrthoFinder, OrthoInspector, orthoMCL, Panther, Phylome, RoundUp, TreeFam
MIOS	54468	21905	MIOS	Fly	33399	FBgn0031399	mio	14	13.8	high	Yes	Yes	Compara, eggNOG, Hieranoid, Homologene, Inparanoid, OMA, OrthoDB, OrthoFinder, OrthoInspector, orthoMCL, Panther, Phylome, RoundUp, TreeFam
SNW1	22938	16696	SNW1	Fly	31840	FBgn0004856	Bx42	14	13.72	high	Yes	Yes	Compara, eggNOG, Hieranoid, Homologene, Inparanoid, Isobase, OMA, OrthoDB, OrthoFinder, OrthoInspector, orthoMCL, Panther, Phylome, TreeFam
CFAP20	29105	29523	CFAP20	Fly	34429	FBgn0032248	Bug22	14	13.8	high	Yes	Yes	Compara, eggNOG, Hieranoid, Homologene, Inparanoid, OMA, OrthoDB, OrthoFinder, OrthoInspector, orthoMCL, Panther, Phylome, RoundUp, TreeFam
SAP18	10284	10530	SAP18	Fly	41965	FBgn0024491	Bin1	14	13.8	high	Yes	Yes	Compara, eggNOG, Hieranoid, Homologene, Inparanoid, OMA, OrthoDB, OrthoFinder, OrthoInspector, orthoMCL, Panther, Phylome, RoundUp, TreeFam
MFAP1	4236	7032	MFAP1	Fly	38256	FBgn0035294	Mfap1	14	13.8	high	Yes	Yes	Compara, eggNOG, Hieranoid, Homologene, Inparanoid, OMA, OrthoDB, OrthoFinder, OrthoInspector, orthoMCL, Panther, Phylome, RoundUp, TreeFam
PAXBP1	94104	13579	PAXBP1	Fly	40842	FBgn0037466	CG1965	14	13.8	high	Yes	Yes	Compara, eggNOG, Hieranoid, Homologene, Inparanoid, OMA, OrthoDB, OrthoFinder, OrthoInspector, orthoMCL, Panther, Phylome, RoundUp, TreeFam
FAM91A1	157769	26306	FAM91A1	Fly	39267	FBgn0064766	CG7600	14	13.8	high	Yes	Yes	Compara, eggNOG, Hieranoid, Homologene, Inparanoid, OMA, OrthoDB, OrthoFinder, OrthoInspector, orthoMCL, Panther, Phylome, RoundUp, TreeFam
WDR82	80335	28826	WDR82	Fly	34153	FBgn0032030	Wdr82	14	13.8	high	Yes	Yes	Compara, eggNOG, Hieranoid, Homologene, Inparanoid, OMA, OrthoDB, OrthoFinder, OrthoInspector, orthoMCL, Panther, Phylome, RoundUp, TreeFam
CDK5	1020	1774	CDK5	Fly	36727	FBgn0013762	Cdk5	14	13.8	high	Yes	Yes	Compara, eggNOG, Hieranoid, Homologene, Inparanoid, OMA, OrthoDB, OrthoFinder, OrthoInspector, orthoMCL, Panther, Phylome, RoundUp, TreeFam
COPA	1314	2230	COPA	Fly	38199	FBgn0025725	alphaCOP	14	13.74	high	Yes	Yes	Compara, eggNOG, Hieranoid, Homologene, Inparanoid, Isobase, OMA, OrthoFinder, OrthoInspector, orthoMCL, Panther, Phylome, RoundUp, TreeFam
COPE	11316	2234	COPE	Fly	33908	FBgn0027496	epsilonCOP	14	13.8	high	Yes	Yes	Compara, eggNOG, Hieranoid, Homologene, Inparanoid, OMA, OrthoDB, OrthoFinder, OrthoInspector, orthoMCL, Panther, Phylome, RoundUp, TreeFam
INPP5F	22876	17054	INPP5F	Fly	42545	FBgn0038890	CG7956	14	13.8	high	Yes	Yes	Compara, eggNOG, Hieranoid, Homologene, Inparanoid, OMA, OrthoDB, OrthoFinder, OrthoInspector, orthoMCL, Panther, Phylome, RoundUp, TreeFam
VPS39	23339	20593	VPS39	Fly	42192	FBgn0038593	Vps39	14	13.8	high	Yes	Yes	Compara, eggNOG, Hieranoid, Homologene, Inparanoid, OMA, OrthoDB, OrthoFinder, OrthoInspector, orthoMCL, Panther, Phylome, RoundUp, TreeFam
SQRDL	58472	20390	SQOR	Fly	38514	FBgn0035515	CG14997	14	13.8	high	Yes	Yes	Compara, eggNOG, Hieranoid, Homologene, Inparanoid, OMA, OrthoDB, OrthoFinder, OrthoInspector, orthoMCL, Panther, Phylome, RoundUp, TreeFam
BIRC2	329	590	BIRC2	Fly	36748	FBgn0015247	Diap2	14	13.8	high	Yes	Yes	Compara, eggNOG, Hieranoid, Homologene, Inparanoid, OMA, OrthoDB, OrthoFinder, OrthoInspector, orthoMCL, Panther, Phylome, RoundUp, TreeFam
MCM5	4174	6948	MCM5	Fly	41296	FBgn0017577	Mcm5	14	13.8	high	Yes	Yes	Compara, eggNOG, Hieranoid, Homologene, Inparanoid, OMA, OrthoDB, OrthoFinder, OrthoInspector, orthoMCL, Panther, Phylome, RoundUp, TreeFam
NUDT19	390916	32036	NUDT19	Fly	35231	FBgn0032790	CG10194	14	13.8	high	Yes	Yes	Compara, eggNOG, Hieranoid, Homologene, Inparanoid, OMA, OrthoDB, OrthoFinder, OrthoInspector, orthoMCL, Panther, Phylome, RoundUp, TreeFam
RBM17	84991	16944	RBM17	Fly	3355114	FBgn0086683	Spf45	14	13.8	high	Yes	Yes	Compara, eggNOG, Hieranoid, Homologene, Inparanoid, OMA, OrthoDB, OrthoFinder, OrthoInspector, orthoMCL, Panther, Phylome, RoundUp, TreeFam
MCCC2	64087	6937	MCCC2	Fly	59261	FBgn0042083	CG3267	14	13.8	high	Yes	Yes	Compara, eggNOG, Hieranoid, Homologene, Inparanoid, OMA, OrthoDB, OrthoFinder, OrthoInspector, orthoMCL, Panther, Phylome, RoundUp, TreeFam
COPB2	9276	2232	COPB2	Fly	45757	FBgn0025724	'beta''COP'	14	13.7	high	Yes	Yes	Compara, eggNOG, Hieranoid, Homologene, Isobase, OMA, OrthoDB, OrthoFinder, OrthoInspector, orthoMCL, Panther, Phylome, RoundUp, TreeFam
LAMB2	3913	6487	LAMB2	Fly	34068	FBgn0261800	LanB1	14	13.8	high	Yes	Yes	Compara, eggNOG, Hieranoid, Homologene, Inparanoid, OMA, OrthoDB, OrthoFinder, OrthoInspector, orthoMCL, Panther, Phylome, RoundUp, TreeFam
ABCD3	5825	67	ABCD3	Fly	32992	FBgn0031069	Pmp70	15	14.75	high	Yes	Yes	Compara, eggNOG, Hieranoid, Homologene, Inparanoid, Isobase, OMA, OrthoDB, OrthoFinder, OrthoInspector, orthoMCL, Panther, Phylome, RoundUp, TreeFam
ATP6V1B2	526	854	ATP6V1B2	Fly	41550	FBgn0005671	Vha55	15	14.75	high	Yes	Yes	Compara, eggNOG, Hieranoid, Homologene, Inparanoid, Isobase, OMA, OrthoDB, OrthoFinder, OrthoInspector, orthoMCL, Panther, Phylome, RoundUp, TreeFam
PLPP1	8611	9228	PLPP1	Fly	35966	FBgn0016078	wun	15	14.75	high	Yes	Yes	Compara, eggNOG, Hieranoid, Homologene, Inparanoid, Isobase, OMA, OrthoDB, OrthoFinder, OrthoInspector, orthoMCL, Panther, Phylome, RoundUp, TreeFam
ATP6V1H	51606	18303	ATP6V1H	Fly	34997	FBgn0027779	VhaSFD	15	14.75	high	Yes	Yes	Compara, eggNOG, Hieranoid, Homologene, Inparanoid, Isobase, OMA, OrthoDB, OrthoFinder, OrthoInspector, orthoMCL, Panther, Phylome, RoundUp, TreeFam
ATP6V1E1	529	857	ATP6V1E1	Fly	40679	FBgn0283535	Vha26	15	14.75	high	Yes	Yes	Compara, eggNOG, Hieranoid, Homologene, Inparanoid, Isobase, OMA, OrthoDB, OrthoFinder, OrthoInspector, orthoMCL, Panther, Phylome, RoundUp, TreeFam
PSMD13	5719	9558	PSMD13	Fly	42802	FBgn0028691	Rpn9	15	14.75	high	Yes	Yes	Compara, eggNOG, Hieranoid, Homologene, Inparanoid, Isobase, OMA, OrthoDB, OrthoFinder, OrthoInspector, orthoMCL, Panther, Phylome, RoundUp, TreeFam
PRKAR1A	5573	9388	PRKAR1A	Fly	40305	FBgn0259243	Pka-R1	15	14.75	high	Yes	Yes	Compara, eggNOG, Hieranoid, Homologene, Inparanoid, Isobase, OMA, OrthoDB, OrthoFinder, OrthoInspector, orthoMCL, Panther, Phylome, RoundUp, TreeFam
UBR4	23352	30313	UBR4	Fly	46243	FBgn0011230	poe	15	14.75	high	Yes	Yes	Compara, eggNOG, Hieranoid, Homologene, Inparanoid, Isobase, OMA, OrthoDB, OrthoFinder, OrthoInspector, orthoMCL, Panther, Phylome, RoundUp, TreeFam
PSMB5	5693	9542	PSMB5	Fly	45269	FBgn0029134	Prosbeta5	15	14.75	high	Yes	Yes	Compara, eggNOG, Hieranoid, Homologene, Inparanoid, Isobase, OMA, OrthoDB, OrthoFinder, OrthoInspector, orthoMCL, Panther, Phylome, RoundUp, TreeFam
ASH2L	9070	744	ASH2L	Fly	42936	FBgn0000139	ash2	15	14.75	high	Yes	Yes	Compara, eggNOG, Hieranoid, Homologene, Inparanoid, Isobase, OMA, OrthoDB, OrthoFinder, OrthoInspector, orthoMCL, Panther, Phylome, RoundUp, TreeFam
LLGL1	3996	6628	LLGL1	Fly	33156	FBgn0002121	l(2)gl	15	14.75	high	Yes	Yes	Compara, eggNOG, Hieranoid, Homologene, Inparanoid, Isobase, OMA, OrthoDB, OrthoFinder, OrthoInspector, orthoMCL, Panther, Phylome, RoundUp, TreeFam
UBE3C	9690	16803	UBE3C	Fly	37876	FBgn0034989	CG3356	15	14.75	high	Yes	Yes	Compara, eggNOG, Hieranoid, Homologene, Inparanoid, Isobase, OMA, OrthoDB, OrthoFinder, OrthoInspector, orthoMCL, Panther, Phylome, RoundUp, TreeFam
PSMD8	5714	9566	PSMD8	Fly	39845	FBgn0028693	Rpn12	15	14.75	high	Yes	Yes	Compara, eggNOG, Hieranoid, Homologene, Inparanoid, Isobase, OMA, OrthoDB, OrthoFinder, OrthoInspector, orthoMCL, Panther, Phylome, RoundUp, TreeFam
PSMD4	5710	9561	PSMD4	Fly	40388	FBgn0015283	Rpn10	15	14.75	high	Yes	Yes	Compara, eggNOG, Hieranoid, Homologene, Inparanoid, Isobase, OMA, OrthoDB, OrthoFinder, OrthoInspector, orthoMCL, Panther, Phylome, RoundUp, TreeFam
SNRNP200	23020	30859	SNRNP200	Fly	39737	FBgn0263599	l(3)72Ab	15	14.75	high	Yes	Yes	Compara, eggNOG, Hieranoid, Homologene, Inparanoid, Isobase, OMA, OrthoDB, OrthoFinder, OrthoInspector, orthoMCL, Panther, Phylome, RoundUp, TreeFam
USP9X	8239	12632	USP9X	Fly	43749	FBgn0005632	faf	15	14.75	high	Yes	Yes	Compara, eggNOG, Hieranoid, Homologene, Inparanoid, Isobase, OMA, OrthoDB, OrthoFinder, OrthoInspector, orthoMCL, Panther, Phylome, RoundUp, TreeFam
MYO1D	4642	7598	MYO1D	Fly	34445	FBgn0086347	Myo31DF	15	14.75	high	Yes	Yes	Compara, eggNOG, Hieranoid, Homologene, Inparanoid, Isobase, OMA, OrthoDB, OrthoFinder, OrthoInspector, orthoMCL, Panther, Phylome, RoundUp, TreeFam
PSMA3	5684	9532	PSMA3	Fly	36018	FBgn0023175	Prosalpha7	15	14.75	high	Yes	Yes	Compara, eggNOG, Hieranoid, Homologene, Inparanoid, Isobase, OMA, OrthoDB, OrthoFinder, OrthoInspector, orthoMCL, Panther, Phylome, RoundUp, TreeFam
PSMB3	5691	9540	PSMB3	Fly	41079	FBgn0026380	Prosbeta3	15	14.75	high	Yes	Yes	Compara, eggNOG, Hieranoid, Homologene, Inparanoid, Isobase, OMA, OrthoDB, OrthoFinder, OrthoInspector, orthoMCL, Panther, Phylome, RoundUp, TreeFam
PSMC5	5705	9552	PSMC5	Fly	33105	FBgn0020369	Rpt6	15	14.75	high	Yes	Yes	Compara, eggNOG, Hieranoid, Homologene, Inparanoid, Isobase, OMA, OrthoDB, OrthoFinder, OrthoInspector, orthoMCL, Panther, Phylome, RoundUp, TreeFam
GCN1	10985	4199	GCN1	Fly	3355040	FBgn0039959	CG17514	15	14.75	high	Yes	Yes	Compara, eggNOG, Hieranoid, Homologene, Inparanoid, Isobase, OMA, OrthoDB, OrthoFinder, OrthoInspector, orthoMCL, Panther, Phylome, RoundUp, TreeFam
ABCA3	21	33	ABCA3	Fly	33103	FBgn0031170	CG1718	15	14.75	high	Yes	Yes	Compara, eggNOG, Hieranoid, Homologene, Inparanoid, Isobase, OMA, OrthoDB, OrthoFinder, OrthoInspector, orthoMCL, Panther, Phylome, RoundUp, TreeFam
ARFGEF3	57221	21213	ARFGEF3	Fly	31537	FBgn0029834	CG5937	15	14.75	high	Yes	Yes	Compara, eggNOG, Hieranoid, Homologene, Inparanoid, Isobase, OMA, OrthoDB, OrthoFinder, OrthoInspector, orthoMCL, Panther, Phylome, RoundUp, TreeFam
PMPCA	23203	18667	PMPCA	Fly	35748	FBgn0033235	CG8728	15	14.75	high	Yes	Yes	Compara, eggNOG, Hieranoid, Homologene, Inparanoid, Isobase, OMA, OrthoDB, OrthoFinder, OrthoInspector, orthoMCL, Panther, Phylome, RoundUp, TreeFam
CWF19L1	55280	25613	CWF19L1	Fly	36208	FBgn0033615	CG7741	15	14.75	high	Yes	Yes	Compara, eggNOG, Hieranoid, Homologene, Inparanoid, Isobase, OMA, OrthoDB, OrthoFinder, OrthoInspector, orthoMCL, Panther, Phylome, RoundUp, TreeFam
DOCK7	85440	19190	DOCK7	Fly	33165	FBgn0031216	Zir	15	14.75	high	Yes	Yes	Compara, eggNOG, Hieranoid, Homologene, Inparanoid, Isobase, OMA, OrthoDB, OrthoFinder, OrthoInspector, orthoMCL, Panther, Phylome, RoundUp, TreeFam
CAMK2D	817	1462	CAMK2D	Fly	43828	FBgn0264607	CaMKII	15	14.75	high	Yes	Yes	Compara, eggNOG, Hieranoid, Homologene, Inparanoid, Isobase, OMA, OrthoDB, OrthoFinder, OrthoInspector, orthoMCL, Panther, Phylome, RoundUp, TreeFam
TFIP11	24144	17165	TFIP11	Fly	44238	FBgn0024191	sip1	15	14.75	high	Yes	Yes	Compara, eggNOG, Hieranoid, Homologene, Inparanoid, Isobase, OMA, OrthoDB, OrthoFinder, OrthoInspector, orthoMCL, Panther, Phylome, RoundUp, TreeFam
DDX28	55794	17330	DDX28	Fly	33254	FBgn0086130	Dbp21E2	15	14.75	high	Yes	Yes	Compara, eggNOG, Hieranoid, Homologene, Inparanoid, Isobase, OMA, OrthoDB, OrthoFinder, OrthoInspector, orthoMCL, Panther, Phylome, RoundUp, TreeFam
RUVBL1	8607	10474	RUVBL1	Fly	53439	FBgn0040078	pont	15	14.75	high	Yes	Yes	Compara, eggNOG, Hieranoid, Homologene, Inparanoid, Isobase, OMA, OrthoDB, OrthoFinder, OrthoInspector, orthoMCL, Panther, Phylome, RoundUp, TreeFam
RUVBL2	10856	10475	RUVBL2	Fly	40092	FBgn0040075	rept	15	14.75	high	Yes	Yes	Compara, eggNOG, Hieranoid, Homologene, Inparanoid, Isobase, OMA, OrthoDB, OrthoFinder, OrthoInspector, orthoMCL, Panther, Phylome, RoundUp, TreeFam
DDX52	11056	20038	DDX52	Fly	39979	FBgn0036754	CG5589	15	14.75	high	Yes	Yes	Compara, eggNOG, Hieranoid, Homologene, Inparanoid, Isobase, OMA, OrthoDB, OrthoFinder, OrthoInspector, orthoMCL, Panther, Phylome, RoundUp, TreeFam
U2AF2	11338	23156	U2AF2	Fly	32602	FBgn0005411	U2af50	15	14.75	high	Yes	Yes	Compara, eggNOG, Hieranoid, Homologene, Inparanoid, Isobase, OMA, OrthoDB, OrthoFinder, OrthoInspector, orthoMCL, Panther, Phylome, RoundUp, TreeFam
SF3A3	10946	10767	SF3A3	Fly	40678	FBgn0014366	noi	15	14.75	high	Yes	Yes	Compara, eggNOG, Hieranoid, Homologene, Inparanoid, Isobase, OMA, OrthoDB, OrthoFinder, OrthoInspector, orthoMCL, Panther, Phylome, RoundUp, TreeFam
EIF4A3	9775	18683	EIF4A3	Fly	40987	FBgn0037573	eIF4AIII	15	14.75	high	Yes	Yes	Compara, eggNOG, Hieranoid, Homologene, Inparanoid, Isobase, OMA, OrthoDB, OrthoFinder, OrthoInspector, orthoMCL, Panther, Phylome, RoundUp, TreeFam
CLPX	10845	2088	CLPX	Fly	42369	FBgn0038745	CG4538	15	14.75	high	Yes	Yes	Compara, eggNOG, Hieranoid, Homologene, Inparanoid, Isobase, OMA, OrthoDB, OrthoFinder, OrthoInspector, orthoMCL, Panther, Phylome, RoundUp, TreeFam
GTPBP2	54676	4670	GTPBP2	Fly	40733	FBgn0037391	CG2017	15	14.75	high	Yes	Yes	Compara, eggNOG, Hieranoid, Homologene, Inparanoid, Isobase, OMA, OrthoDB, OrthoFinder, OrthoInspector, orthoMCL, Panther, Phylome, RoundUp, TreeFam
SGPL1	8879	10817	SGPL1	Fly	46059	FBgn0010591	Sply	15	14.75	high	Yes	Yes	Compara, eggNOG, Hieranoid, Homologene, Inparanoid, Isobase, OMA, OrthoDB, OrthoFinder, OrthoInspector, orthoMCL, Panther, Phylome, RoundUp, TreeFam
CPSF3	51692	2326	CPSF3	Fly	42240	FBgn0261065	Cpsf73	15	14.75	high	Yes	Yes	Compara, eggNOG, Hieranoid, Homologene, Inparanoid, Isobase, OMA, OrthoDB, OrthoFinder, OrthoInspector, orthoMCL, Panther, Phylome, RoundUp, TreeFam
CPSF2	53981	2325	CPSF2	Fly	43426	FBgn0027873	Cpsf100	15	14.75	high	Yes	Yes	Compara, eggNOG, Hieranoid, Homologene, Inparanoid, Isobase, OMA, OrthoDB, OrthoFinder, OrthoInspector, orthoMCL, Panther, Phylome, RoundUp, TreeFam
CSNK2A1	1457	2457	CSNK2A1	Fly	48448	FBgn0264492	CkIIalpha	15	14.75	high	Yes	Yes	Compara, eggNOG, Hieranoid, Homologene, Inparanoid, Isobase, OMA, OrthoDB, OrthoFinder, OrthoInspector, orthoMCL, Panther, Phylome, RoundUp, TreeFam
POLD1	5424	9175	POLD1	Fly	39746	FBgn0263600	DNApol-delta	15	14.75	high	Yes	Yes	Compara, eggNOG, Hieranoid, Homologene, Inparanoid, Isobase, OMA, OrthoDB, OrthoFinder, OrthoInspector, orthoMCL, Panther, Phylome, RoundUp, TreeFam
HADHA	3030	4801	HADHA	Fly	34276	FBgn0028479	Mtpalpha	15	14.75	high	Yes	Yes	Compara, eggNOG, Hieranoid, Homologene, Inparanoid, Isobase, OMA, OrthoDB, OrthoFinder, OrthoInspector, orthoMCL, Panther, Phylome, RoundUp, TreeFam

## Sheet: B. Fly to human DIOPT
Fly GeneID	Fly Gene ID	FlyBaseID	Fly Symbol	Species	Human GeneID	HGNCID	Human Symbol	DIOPT Score	Weighted Score	Rank	Best Score	Best Score Reverse	Prediction Derived From
FBgn0000044	37368	FBgn0000044	Act57B	Human	139741	24027	ACTRT1	2	2	low	No	No	eggNOG, Panther
FBgn0000044	37368	FBgn0000044	Act57B	Human	140625	24026	ACTRT2	2	2	low	No	No	eggNOG, Panther
FBgn0000044	37368	FBgn0000044	Act57B	Human	84517	24022	ACTRT3	2	2	moderate	No	Yes	eggNOG, Panther
FBgn0000044	37368	FBgn0000044	Act57B	Human	10120	168	ACTR1B	2	1.91	low	No	No	eggNOG, OrthoDB
FBgn0000044	37368	FBgn0000044	Act57B	Human	10121	167	ACTR1A	2	1.91	low	No	No	eggNOG, OrthoDB
FBgn0000045	40444	FBgn0000045	Act79B	Human	139741	24027	ACTRT1	2	2	low	No	No	eggNOG, Panther
FBgn0000045	40444	FBgn0000045	Act79B	Human	140625	24026	ACTRT2	2	2	low	No	No	eggNOG, Panther
FBgn0000045	40444	FBgn0000045	Act79B	Human	84517	24022	ACTRT3	2	2	moderate	No	Yes	eggNOG, Panther
FBgn0000045	40444	FBgn0000045	Act79B	Human	10120	168	ACTR1B	2	1.91	low	No	No	eggNOG, OrthoDB
FBgn0000045	40444	FBgn0000045	Act79B	Human	10121	167	ACTR1A	2	1.91	low	No	No	eggNOG, OrthoDB
FBgn0000047	41885	FBgn0000047	Act88F	Human	139741	24027	ACTRT1	2	2	low	No	No	eggNOG, Panther
FBgn0000047	41885	FBgn0000047	Act88F	Human	140625	24026	ACTRT2	2	2	low	No	No	eggNOG, Panther
FBgn0000047	41885	FBgn0000047	Act88F	Human	84517	24022	ACTRT3	2	2	moderate	No	Yes	eggNOG, Panther
FBgn0000047	41885	FBgn0000047	Act88F	Human	10120	168	ACTR1B	2	1.91	low	No	No	eggNOG, OrthoDB
FBgn0000047	41885	FBgn0000047	Act88F	Human	10121	167	ACTR1A	2	1.91	low	No	No	eggNOG, OrthoDB
FBgn0000253	36329	FBgn0000253	Cam	Human	91860	18445	CALML4	2	2	low	No	No	eggNOG, Panther
FBgn0000299	33727	FBgn0000299	Col4a1	Human	1310	2196	COL19A1	2	1.83	moderate	No	Yes	Compara, orthoMCL
FBgn0000317	34882	FBgn0000317	ck	Human	4651	7593	MYO10	2	1.8	moderate	No	Yes	eggNOG, orthoMCL
FBgn0000317	34882	FBgn0000317	ck	Human	51168	7594	MYO15A	2	1.8	low	No	No	eggNOG, orthoMCL
FBgn0000352	35653	FBgn0000352	cos	Human	55582	18632	KIF27	2	1.92	moderate	No	Yes	OMA, Phylome
FBgn0000479	31309	FBgn0000479	dnc	Human	5152	8795	PDE9A	2	1.93	low	No	No	eggNOG, RoundUp
FBgn0000667	31166	FBgn0000667	Actn	Human	51332	15680	SPTBN5	2	1.93	low	No	No	eggNOG, RoundUp
FBgn0000667	31166	FBgn0000667	Actn	Human	6712	11276	SPTBN2	2	1.9	low	No	No	eggNOG, OrthoFinder
FBgn0000667	31166	FBgn0000667	Actn	Human	6711	11275	SPTBN1	2	1.9	low	No	No	eggNOG, OrthoFinder
FBgn0000667	31166	FBgn0000667	Actn	Human	57731	14896	SPTBN4	2	1.9	low	No	No	eggNOG, OrthoFinder
FBgn0001142	33172	FBgn0001142	Gs1	Human	51557	21016	LGSN	2	1.81	moderate	No	Yes	eggNOG, Phylome
FBgn0001225	39075	FBgn0001225	Hsp26	Human	94086	30589	HSPB9	2	1.91	moderate	No	Yes	eggNOG, OrthoDB
FBgn0001225	39075	FBgn0001225	Hsp26	Human	27129	5249	HSPB7	2	1.91	moderate	No	Yes	eggNOG, OrthoDB
FBgn0002526	38723	FBgn0002526	LanA	Human	10319	6494	LAMC3	2	1.91	low	No	No	OrthoDB, orthoMCL
FBgn0002526	38723	FBgn0002526	LanA	Human	3918	6493	LAMC2	2	1.91	low	No	No	OrthoDB, orthoMCL
FBgn0002774	35523	FBgn0002774	mle	Human	22907	16716	DHX30	2	1.91	moderate	No	Yes	eggNOG, OrthoDB
FBgn0002774	35523	FBgn0002774	mle	Human	64848	24721	YTHDC2	2	1.91	low	No	No	eggNOG, OrthoDB
FBgn0002774	35523	FBgn0002774	mle	Human	54505	15815	DHX29	2	1.8	moderate	No	Yes	eggNOG, orthoMCL
FBgn0002924	43517	FBgn0002924	ncd	Human	90990	29530	KIFC2	2	1.91	moderate	No	Yes	eggNOG, OrthoDB
FBgn0003124	40232	FBgn0003124	polo	Human	10733	11397	PLK4	2	1.91	low	No	No	eggNOG, OrthoDB
FBgn0003204	43873	FBgn0003204	ras	Human	2766	4376	GMPR	2	1.91	moderate	No	Yes	eggNOG, OrthoDB
FBgn0003204	43873	FBgn0003204	ras	Human	51292	4377	GMPR2	2	1.91	moderate	No	Yes	eggNOG, OrthoDB
FBgn0003317	35731	FBgn0003317	sax	Human	657	1076	BMPR1A	2	1.91	low	No	No	eggNOG, OrthoDB
FBgn0003317	35731	FBgn0003317	sax	Human	658	1077	BMPR1B	2	1.91	low	No	No	eggNOG, OrthoDB
FBgn0003391	37386	FBgn0003391	shg	Human	28316	1760	CDH20	2	1.95	moderate	Yes	No	Isobase, OrthoFinder
FBgn0003514	31554	FBgn0003514	sqh	Human	58498	21719	MYL7	2	2	low	No	No	eggNOG, Panther
FBgn0003514	31554	FBgn0003514	sqh	Human	29895	29824	MYLPF	2	2	low	No	No	eggNOG, Panther
FBgn0004237	48535	FBgn0004237	Hrb87F	Human	124540	18585	MSI2	2	2.01	low	No	No	OrthoDB, OrthoFinder
FBgn0004237	48535	FBgn0004237	Hrb87F	Human	4440	7330	MSI1	2	2.01	low	No	No	OrthoDB, OrthoFinder
FBgn0004237	48535	FBgn0004237	Hrb87F	Human	9987	5037	HNRNPDL	2	2.01	low	No	No	OrthoDB, OrthoFinder
FBgn0010328	47249	FBgn0010328	woc	Human	79830	26253	ZMYM1	2	2.03	moderate	No	Yes	Compara, Panther
FBgn0010380	32987	FBgn0010380	AP-1-2beta	Human	10717	572	AP4B1	2	1.91	moderate	No	Yes	eggNOG, OrthoDB
FBgn0011020	40859	FBgn0011020	Sas-4	Human	401285	21254	TCP10L2	2	2.11	moderate	No	Yes	OrthoDB, Panther
FBgn0011020	40859	FBgn0011020	Sas-4	Human	140290	11657	TCP10L	2	2.11	moderate	No	Yes	OrthoDB, Panther
FBgn0011327	39102	FBgn0011327	Uch-L5	Human	8314	950	BAP1	2	1.91	low	No	No	eggNOG, OrthoDB
FBgn0013733	36542	FBgn0013733	shot	Human	5493	9273	PPL	2	2.03	moderate	No	Yes	Compara, Panther
FBgn0013733	36542	FBgn0013733	shot	Human	2125	3503	EVPL	2	2.03	moderate	No	Yes	Compara, Panther
FBgn0013733	36542	FBgn0013733	shot	Human	83481	15577	EPPK1	2	2.03	moderate	No	Yes	Compara, Panther
FBgn0014340	31518	FBgn0014340	mof	Human	23522	17582	KAT6B	2	1.91	low	No	No	eggNOG, OrthoDB
FBgn0014340	31518	FBgn0014340	mof	Human	7994	13013	KAT6A	2	1.91	low	No	No	eggNOG, OrthoDB
FBgn0015283	40388	FBgn0015283	Rpn10	Human	266971	23733	PIPSL	2	1.91	low	No	No	OrthoInspector, Phylome
FBgn0016075	33726	FBgn0016075	vkg	Human	1284	2203	COL4A2	2	1.83	low	No	No	Compara, orthoMCL
FBgn0016075	33726	FBgn0016075	vkg	Human	1286	2206	COL4A4	2	1.83	low	No	No	Compara, orthoMCL
FBgn0016075	33726	FBgn0016075	vkg	Human	1285	2204	COL4A3	2	1.81	low	No	No	orthoMCL, Phylome
FBgn0016075	33726	FBgn0016075	vkg	Human	1301	2186	COL11A1	2	1.81	moderate	No	Yes	orthoMCL, Phylome
FBgn0016075	33726	FBgn0016075	vkg	Human	1281	2201	COL3A1	2	1.81	moderate	No	Yes	orthoMCL, Phylome
FBgn0016075	33726	FBgn0016075	vkg	Human	1289	2209	COL5A1	2	1.81	moderate	No	Yes	orthoMCL, Phylome
FBgn0016984	37356	FBgn0016984	sktl	Human	138429	28711	PIP5KL1	2	2	moderate	No	Yes	eggNOG, Panther
FBgn0020909	32338	FBgn0020909	Rtc1	Human	8634	17981	RTCA	2	1.91	low	No	No	eggNOG, OrthoDB
FBgn0024992	31253	FBgn0024992	CG2658	Human	10939	315	AFG3L2	2	1.8	low	No	No	eggNOG, orthoMCL
FBgn0025455	39961	FBgn0025455	CycT	Human	92002	28434	CCNQ	2	1.91	low	No	No	eggNOG, OrthoDB
FBgn0025633	31004	FBgn0025633	CG13366	Human	101730217	49185	SPECC1L-ADORA2A	2	2.03	moderate	No	Yes	Compara, Panther
FBgn0025633	31004	FBgn0025633	CG13366	Human	342527	24764	SMTNL2	2	1.86	low	No	No	eggNOG, TreeFam
FBgn0025633	31004	FBgn0025633	CG13366	Human	219537	32394	SMTNL1	2	1.86	low	No	No	eggNOG, TreeFam
FBgn0025683	33171	FBgn0025683	CG3164	Human	9429	74	ABCG2	2	2.03	low	No	No	OrthoFinder, RoundUp
FBgn0025683	33171	FBgn0025683	CG3164	Human	64240	13886	ABCG5	2	1.9	low	No	No	eggNOG, OrthoFinder
FBgn0027572	37028	FBgn0027572	CG5009	Human	8310	121	ACOX3	2	1.9	low	No	No	eggNOG, OrthoFinder
FBgn0027603	32910	FBgn0027603	Ulp1	Human	26168	17862	SENP3	2	2	low	No	No	eggNOG, Panther
FBgn0027603	32910	FBgn0027603	Ulp1	Human	205564	28407	SENP5	2	2	low	No	No	eggNOG, Panther
FBgn0027609	33648	FBgn0027609	morgue	Human	7323	12476	UBE2D3	2	2	low	No	No	eggNOG, Panther
FBgn0027609	33648	FBgn0027609	morgue	Human	7322	12475	UBE2D2	2	2	low	No	No	eggNOG, Panther
FBgn0027609	33648	FBgn0027609	morgue	Human	7321	12474	UBE2D1	2	2	low	No	No	eggNOG, Panther
FBgn0028479	34276	FBgn0028479	Mtpalpha	Human	1962	3247	EHHADH	2	1.8	moderate	No	Yes	eggNOG, orthoMCL
FBgn0029006	36999	FBgn0029006	Smurf	Human	11059	17004	WWP1	2	1.91	low	No	No	eggNOG, OrthoDB
FBgn0030674	32510	FBgn0030674	CG8184	Human	57531	21033	HACE1	2	2	moderate	No	Yes	eggNOG, Panther
FBgn0030855	32742	FBgn0030855	CG5800	Human	8886	2741	DDX18	2	1.91	low	No	No	eggNOG, OrthoDB
FBgn0030974	32886	FBgn0030974	CG7358	Human	23091	20368	ZC3H13	2	2.08	high	Yes	Yes	Inparanoid, RoundUp
FBgn0030993	32905	FBgn0030993	Mec2	Human	7827	13394	NPHS2	2	1.91	low	No	No	eggNOG, OrthoDB
FBgn0031069	32992	FBgn0031069	Pmp70	Human	5826	68	ABCD4	2	1.91	moderate	No	Yes	OrthoDB, orthoMCL
FBgn0031107	33035	FBgn0031107	HERC2	Human	8925	4867	HERC1	2	1.91	moderate	No	Yes	eggNOG, OrthoDB
FBgn0031118	33048	FBgn0031118	RhoGAP19D	Human	64333	14130	ARHGAP9	2	2.13	moderate	No	Yes	Panther, RoundUp
FBgn0031118	33048	FBgn0031118	RhoGAP19D	Human	201176	31813	ARHGAP27	2	2.13	moderate	No	Yes	Panther, RoundUp
FBgn0031478	33492	FBgn0031478	CG8814	Human	84320	23339	ACBD6	2	1.91	low	No	No	eggNOG, OrthoDB
FBgn0031478	33492	FBgn0031478	CG8814	Human	414149	17715	ACBD7	2	1.91	low	No	No	eggNOG, OrthoDB
FBgn0031478	33492	FBgn0031478	CG8814	Human	1622	2690	DBI	2	1.91	low	No	No	eggNOG, OrthoDB
FBgn0031622	33671	FBgn0031622	CG3251	Human	220213	27346	OTUD1	2	1.91	moderate	No	Yes	Isobase, TreeFam
FBgn0031631	33680	FBgn0031631	CG3225	Human	56919	16718	DHX33	2	2.01	low	No	No	OrthoDB, OrthoFinder
FBgn0031631	33680	FBgn0031631	CG3225	Human	8449	2739	DHX16	2	1.91	low	No	No	eggNOG, OrthoDB
FBgn0031631	33680	FBgn0031631	CG3225	Human	9785	17211	DHX38	2	1.91	low	No	No	eggNOG, OrthoDB
FBgn0032329	34528	FBgn0032329	Art8	Human	10196	30163	PRMT3	2	1.91	low	No	No	eggNOG, OrthoDB
FBgn0032329	34528	FBgn0032329	Art8	Human	56341	5188	PRMT8	2	1.91	low	No	No	eggNOG, OrthoDB
FBgn0032329	34528	FBgn0032329	Art8	Human	3276	5187	PRMT1	2	1.91	low	No	No	eggNOG, OrthoDB
FBgn0032455	34685	FBgn0032455	Pih1D1	Human	55172	20188	DNAAF2	2	1.93	low	No	No	eggNOG, RoundUp
FBgn0032702	35126	FBgn0032702	CG10376	Human	151742	16381	PPM1L	2	1.91	low	No	No	eggNOG, OrthoDB
FBgn0032702	35126	FBgn0032702	CG10376	Human	80895	15566	ILKAP	2	1.91	moderate	No	Yes	eggNOG, OrthoDB
FBgn0033155	35648	FBgn0033155	Br140	Human	79960	30027	JADE1	2	2.04	low	No	No	OrthoDB, RoundUp
FBgn0033155	35648	FBgn0033155	Br140	Human	9767	22982	JADE3	2	2.04	low	No	No	OrthoDB, RoundUp
FBgn0033155	35648	FBgn0033155	Br140	Human	8028	16063	MLLT10	2	2.04	low	No	No	OrthoDB, RoundUp
FBgn0033155	35648	FBgn0033155	Br140	Human	4302	7138	MLLT6	2	2.04	low	No	No	OrthoDB, RoundUp
FBgn0033160	35654	FBgn0033160	Dhx15	Human	56919	16718	DHX33	2	2.01	low	No	No	OrthoDB, OrthoFinder
FBgn0033160	35654	FBgn0033160	Dhx15	Human	165545	20410	DQX1	2	2	moderate	No	Yes	eggNOG, Panther
FBgn0033160	35654	FBgn0033160	Dhx15	Human	55760	16717	DHX32	2	2	moderate	No	Yes	eggNOG, Panther
FBgn0033160	35654	FBgn0033160	Dhx15	Human	1659	2749	DHX8	2	1.91	low	No	No	OrthoDB, orthoMCL
FBgn0033194	35693	FBgn0033194	Vps13	Human	55187	23595	VPS13D	2	1.93	low	No	No	eggNOG, RoundUp
FBgn0033194	35693	FBgn0033194	Vps13	Human	157680	2183	VPS13B	2	1.93	low	No	No	eggNOG, RoundUp
FBgn0033692	36311	FBgn0033692	wash	Human	375260	33145	WASH2P	2	2.05	moderate	No	Yes	Isobase, Panther
FBgn0033889	36550	FBgn0033889	CG6701	Human	54456	7201	MOV10L1	2	1.91	low	No	No	eggNOG, OrthoDB
FBgn0033998	36685	FBgn0033998	row	Human	140883	23022	ZNF280B	2	1.89	moderate	No	Yes	Compara, TreeFam
FBgn0033998	36685	FBgn0033998	row	Human	129025	18597	ZNF280A	2	1.89	moderate	No	Yes	Compara, TreeFam
FBgn0034792	37636	FBgn0034792	CG3499	Human	10939	315	AFG3L2	2	2	low	No	No	orthoMCL, Panther
FBgn0034975	37859	FBgn0034975	enok	Human	10524	5275	KAT5	2	1.85	low	No	No	eggNOG, Isobase
FBgn0035268	38224	FBgn0035268	CG8001	Human	23038	29175	WDTC1	2	1.93	low	No	No	eggNOG, RoundUp
FBgn0035707	38740	FBgn0035707	CG8368	Human	254958	24660	REXO1L1P	2	2	low	No	No	eggNOG, Panther
FBgn0036929	40190	FBgn0036929	CG7668	Human	10875	3696	FGL2	2	1.91	moderate	Yes	No	eggNOG, OMA
FBgn0036929	40190	FBgn0036929	CG7668	Human	2219	3623	FCN1	2	1.86	moderate	Yes	No	eggNOG, TreeFam
FBgn0036929	40190	FBgn0036929	CG7668	Human	2220	3624	FCN2	2	1.86	moderate	Yes	No	eggNOG, TreeFam
FBgn0036929	40190	FBgn0036929	CG7668	Human	253935	19705	ANGPTL5	2	1.83	moderate	Yes	No	Compara, eggNOG
FBgn0036929	40190	FBgn0036929	CG7668	Human	27329	491	ANGPTL3	2	1.83	moderate	Yes	No	Compara, eggNOG
FBgn0036929	40190	FBgn0036929	CG7668	Human	51129	16039	ANGPTL4	2	1.83	moderate	Yes	No	Compara, eggNOG
FBgn0036929	40190	FBgn0036929	CG7668	Human	2243	3661	FGA	2	1.83	moderate	Yes	No	Compara, eggNOG
FBgn0037465	40841	FBgn0037465	CG1105	Human	645432	31407	ARRDC5	2	2	moderate	No	Yes	eggNOG, Panther
FBgn0037470	40847	FBgn0037470	Tailor	Human	23318	28981	ZCCHC11	2	2	moderate	Yes	No	eggNOG, Panther
FBgn0037470	40847	FBgn0037470	Tailor	Human	79670	25817	ZCCHC6	2	2	high	Yes	Yes	eggNOG, Panther
FBgn0037470	40847	FBgn0037470	Tailor	Human	55149	25532	MTPAP	2	1.86	moderate	Yes	No	eggNOG, TreeFam
FBgn0037470	40847	FBgn0037470	Tailor	Human	64852	26184	TUT1	2	1.86	moderate	Yes	No	eggNOG, TreeFam
FBgn0037517	40920	FBgn0037517	CG10086	Human	645432	31407	ARRDC5	2	2	moderate	No	Yes	eggNOG, Panther
FBgn0037518	40921	FBgn0037518	CG2641	Human	645432	31407	ARRDC5	2	2	moderate	No	Yes	eggNOG, Panther
FBgn0037521	40924	FBgn0037521	CG2993	Human	645432	31407	ARRDC5	2	2	moderate	No	Yes	eggNOG, Panther
FBgn0037710	41152	FBgn0037710	CG9393	Human	10651	7506	MTX2	2	2.03	low	No	No	OrthoFinder, RoundUp
FBgn0037853	41317	FBgn0037853	CG14696	Human	645432	31407	ARRDC5	2	2	moderate	No	Yes	eggNOG, Panther
FBgn0037853	41317	FBgn0037853	CG14696	Human	27106	25225	ARRDC2	2	1.9	low	No	No	eggNOG, OrthoFinder
FBgn0037853	41317	FBgn0037853	CG14696	Human	91947	28087	ARRDC4	2	1.9	low	No	No	eggNOG, OrthoFinder
FBgn0037853	41317	FBgn0037853	CG14696	Human	10628	16952	TXNIP	2	1.9	low	No	No	eggNOG, OrthoFinder
FBgn0037856	41320	FBgn0037856	Leash	Human	645432	31407	ARRDC5	2	2	moderate	No	Yes	eggNOG, Panther
FBgn0037856	41320	FBgn0037856	Leash	Human	27106	25225	ARRDC2	2	1.9	low	No	No	eggNOG, OrthoFinder
FBgn0037856	41320	FBgn0037856	Leash	Human	91947	28087	ARRDC4	2	1.9	low	No	No	eggNOG, OrthoFinder
FBgn0037856	41320	FBgn0037856	Leash	Human	57561	29263	ARRDC3	2	1.9	low	No	No	eggNOG, OrthoFinder
FBgn0037856	41320	FBgn0037856	Leash	Human	10628	16952	TXNIP	2	1.9	low	No	No	eggNOG, OrthoFinder
FBgn0038016	41498	FBgn0038016	MBD-R2	Human	55904	18541	KMT2E	2	1.93	low	No	No	eggNOG, RoundUp
FBgn0038349	41896	FBgn0038349	AOX3	Human	7498	12805	XDH	2	1.85	moderate	Yes	No	eggNOG, Isobase
FBgn0038826	42460	FBgn0038826	Syp	Human	373863	23799	DND1	2	1.94	moderate	No	Yes	Compara, OrthoDB
FBgn0038966	42635	FBgn0038966	pinta	Human	157807	23139	CLVS1	2	1.83	low	No	No	Compara, eggNOG
FBgn0038966	42635	FBgn0038966	pinta	Human	6017	10024	RLBP1	2	1.83	low	No	No	Compara, eggNOG
FBgn0038966	42635	FBgn0038966	pinta	Human	134829	23046	CLVS2	2	1.83	low	No	No	Compara, eggNOG
FBgn0039566	43358	FBgn0039566	CG4849	Human	1938	3214	EEF2	2	1.91	low	No	No	eggNOG, OrthoDB
FBgn0039581	43374	FBgn0039581	Moca-cyp	Human	5481	9257	PPID	2	1.9	low	No	No	eggNOG, OrthoFinder
FBgn0039581	43374	FBgn0039581	Moca-cyp	Human	10465	14651	PPIH	2	1.9	low	No	No	eggNOG, OrthoFinder
FBgn0039710	43529	FBgn0039710	dgt1	Human	54891	25997	INO80D	2	1.94	low	No	No	Compara, OrthoDB
FBgn0039776	43620	FBgn0039776	PH4alphaEFB	Human	54681	28858	P4HTM	2	1.91	moderate	No	Yes	eggNOG, OrthoDB
FBgn0040011	3355127	FBgn0040011	Slmap	Human	64753	22225	CCDC136	2	2.03	moderate	No	Yes	Compara, Panther
FBgn0040236	53436	FBgn0040236	c11.1	Human	100527960	49180	MROH7-TTC4	2	2.03	moderate	No	Yes	Compara, Panther
FBgn0040236	53436	FBgn0040236	c11.1	Human	83876	24121	MRO	2	1.81	moderate	No	Yes	eggNOG, Phylome
FBgn0041184	35085	FBgn0041184	Socs36E	Human	1154	1984	CISH	2	2	low	No	No	eggNOG, Panther
FBgn0041184	35085	FBgn0041184	Socs36E	Human	8651	19383	SOCS1	2	2	low	No	No	eggNOG, Panther
FBgn0041184	35085	FBgn0041184	Socs36E	Human	8835	19382	SOCS2	2	2	low	No	No	eggNOG, Panther
FBgn0041184	35085	FBgn0041184	Socs36E	Human	9021	19391	SOCS3	2	2	low	No	No	eggNOG, Panther
FBgn0041184	35085	FBgn0041184	Socs36E	Human	30837	29846	SOCS7	2	1.9	low	No	No	eggNOG, Hieranoid
FBgn0042101	59140	FBgn0042101	CG18744	Human	645432	31407	ARRDC5	2	2	moderate	No	Yes	eggNOG, Panther
FBgn0042101	59140	FBgn0042101	CG18744	Human	27106	25225	ARRDC2	2	1.9	low	No	No	eggNOG, OrthoFinder
FBgn0042101	59140	FBgn0042101	CG18744	Human	91947	28087	ARRDC4	2	1.9	low	No	No	eggNOG, OrthoFinder
FBgn0042101	59140	FBgn0042101	CG18744	Human	57561	29263	ARRDC3	2	1.9	low	No	No	eggNOG, OrthoFinder
FBgn0042101	59140	FBgn0042101	CG18744	Human	10628	16952	TXNIP	2	1.9	low	No	No	eggNOG, OrthoFinder
FBgn0042102	59141	FBgn0042102	CG18745	Human	645432	31407	ARRDC5	2	2	moderate	No	Yes	eggNOG, Panther
FBgn0042103	59142	FBgn0042103	CG18746	Human	645432	31407	ARRDC5	2	2	moderate	No	Yes	eggNOG, Panther
FBgn0042104	59143	FBgn0042104	CG18747	Human	645432	31407	ARRDC5	2	2	moderate	No	Yes	eggNOG, Panther
FBgn0042105	59144	FBgn0042105	CG18748	Human	645432	31407	ARRDC5	2	2	moderate	No	Yes	eggNOG, Panther
FBgn0043458	192509	FBgn0043458	CG12084	Human	440590	32058	ZYG11A	2	1.91	moderate	No	Yes	eggNOG, OrthoDB
FBgn0043458	192509	FBgn0043458	CG12084	Human	79699	25820	ZYG11B	2	1.91	moderate	No	Yes	eggNOG, OrthoDB
FBgn0051601	318835	FBgn0051601	CG31601	Human	124245	25091	ZC3H18	2	1.91	moderate	Yes	No	eggNOG, OrthoDB
FBgn0086384	32979	FBgn0086384	Mer	Human	7430	12691	EZR	2	1.9	low	No	No	eggNOG, OrthoFinder
FBgn0086444	35192	FBgn0086444	l(2)37Cb	Human	1659	2749	DHX8	2	1.91	low	No	No	OrthoDB, orthoMCL
FBgn0086444	35192	FBgn0086444	l(2)37Cb	Human	60625	15861	DHX35	2	1.91	low	No	No	eggNOG, OrthoDB
FBgn0086712	36242	FBgn0086712	Egm	Human	34	89	ACADM	2	2.11	low	No	No	OrthoDB, Panther
FBgn0086712	36242	FBgn0086712	Egm	Human	37	92	ACADVL	2	1.91	low	No	No	eggNOG, OrthoDB
FBgn0086895	36561	FBgn0086895	pea	Human	56919	16718	DHX33	2	1.91	low	No	No	eggNOG, OrthoDB
FBgn0086895	36561	FBgn0086895	pea	Human	79665	18018	DHX40	2	1.91	moderate	No	Yes	eggNOG, OrthoDB
FBgn0086895	36561	FBgn0086895	pea	Human	60625	15861	DHX35	2	1.91	low	No	No	eggNOG, OrthoDB
FBgn0086906	44013	FBgn0086906	sls	Human	283284	26750	IGSF22	2	1.9	moderate	No	Yes	eggNOG, OrthoFinder
FBgn0086906	44013	FBgn0086906	sls	Human	91156	24607	IGFN1	2	1.9	moderate	No	Yes	eggNOG, OrthoFinder
FBgn0086906	44013	FBgn0086906	sls	Human	10290	16901	SPEG	2	1.8	low	No	No	eggNOG, orthoMCL
FBgn0086906	44013	FBgn0086906	sls	Human	23363	29092	OBSL1	2	1.8	moderate	No	Yes	eggNOG, orthoMCL
FBgn0260771	44900	FBgn0260771	Larp7	Human	6741	11316	SSB	2	2.04	low	No	No	OrthoDB, RoundUp
FBgn0261268	34896	FBgn0261268	Cul3	Human	8450	2555	CUL4B	2	1.91	low	No	No	eggNOG, OrthoDB
FBgn0261397	35680	FBgn0261397	didum	Human	4629	7569	MYH11	2	1.8	low	No	No	eggNOG, orthoMCL
FBgn0261456	37247	FBgn0261456	hpo	Human	5871	6864	MAP4K2	2	2.01	low	No	No	OrthoDB, OrthoFinder
FBgn0261456	37247	FBgn0261456	hpo	Human	8491	6865	MAP4K3	2	2.01	low	No	No	OrthoDB, OrthoFinder
FBgn0261456	37247	FBgn0261456	hpo	Human	8428	11403	STK24	2	2.01	low	No	No	OrthoDB, OrthoFinder
FBgn0261456	37247	FBgn0261456	hpo	Human	11184	6863	MAP4K1	2	2.01	low	No	No	OrthoDB, OrthoFinder
FBgn0261456	37247	FBgn0261456	hpo	Human	10494	11404	STK25	2	2.01	low	No	No	OrthoDB, OrthoFinder
FBgn0263351	42642	FBgn0263351	AP-2mu	Human	10053	558	AP1M2	2	1.91	low	No	No	eggNOG, OrthoDB
FBgn0263351	42642	FBgn0263351	AP-2mu	Human	9179	574	AP4M1	2	1.91	moderate	No	Yes	eggNOG, OrthoDB
FBgn0263351	42642	FBgn0263351	AP-2mu	Human	8907	13667	AP1M1	2	1.91	low	No	No	eggNOG, OrthoDB
FBgn0264855	33211	FBgn0264855	AP-2alpha	Human	8906	556	AP1G2	2	2.01	low	No	No	OrthoDB, OrthoFinder
FBgn0264855	33211	FBgn0264855	AP-2alpha	Human	164	555	AP1G1	2	2.01	low	No	No	OrthoDB, OrthoFinder
FBgn0266581	42595	FBgn0266581	pit	Human	1662	2735	DDX10	2	1.91	low	No	No	eggNOG, OrthoDB
FBgn0266669	39940	FBgn0266669	Sec3	Human	29091	19666	STXBP6	2	2.11	moderate	No	Yes	OrthoDB, Panther
FBgn0266717	41260	FBgn0266717	Bruce	Human	332	593	BIRC5	2	1.91	low	No	No	eggNOG, OrthoDB
FBgn0267408	41894	FBgn0267408	AOX1	Human	316	553	AOX1	2	1.91	moderate	Yes	No	eggNOG, OrthoDB
FBgn0267408	41894	FBgn0267408	AOX1	Human	7498	12805	XDH	2	1.91	moderate	Yes	No	eggNOG, OrthoDB
FBgn0267791	43862	FBgn0267791	HnRNP-K	Human	54039	8651	PCBP3	2	2.04	low	No	No	OrthoDB, RoundUp
FBgn0267791	43862	FBgn0267791	HnRNP-K	Human	57060	8652	PCBP4	2	2.04	low	No	No	OrthoDB, RoundUp
FBgn0267791	43862	FBgn0267791	HnRNP-K	Human	5094	8648	PCBP2	2	2.04	low	No	No	OrthoDB, RoundUp
FBgn0000044	37368	FBgn0000044	Act57B	Human	445582	33895	POTEE	3	2.87	low	No	No	eggNOG, OrthoDB, TreeFam
FBgn0000045	40444	FBgn0000045	Act79B	Human	445582	33895	POTEE	3	2.87	low	No	No	eggNOG, OrthoDB, TreeFam
FBgn0000100	40451	FBgn0000100	RpLP0	Human	220717	36404	RPLP0P6	3	3.15	moderate	No	Yes	Inparanoid, OrthoInspector, Panther
FBgn0001225	39075	FBgn0001225	Hsp26	Human	26353	30171	HSPB8	3	2.84	moderate	No	Yes	Compara, eggNOG, OrthoDB
FBgn0001225	39075	FBgn0001225	Hsp26	Human	8988	5248	HSPB3	3	2.84	moderate	No	Yes	Compara, eggNOG, OrthoDB
FBgn0002526	38723	FBgn0002526	LanA	Human	3915	6492	LAMC1	3	2.81	low	No	No	eggNOG, OrthoDB, orthoMCL
FBgn0002774	35523	FBgn0002774	mle	Human	170506	14410	DHX36	3	2.81	low	No	No	eggNOG, OrthoDB, orthoMCL
FBgn0002774	35523	FBgn0002774	mle	Human	90957	20086	DHX57	3	2.81	low	No	No	eggNOG, OrthoDB, orthoMCL
FBgn0002924	43517	FBgn0002924	ncd	Human	3801	6326	KIFC3	3	2.81	moderate	No	Yes	eggNOG, OrthoDB, orthoMCL
FBgn0003317	35731	FBgn0003317	sax	Human	7046	11772	TGFBR1	3	2.91	low	No	No	eggNOG, Hieranoid, OrthoDB
FBgn0003317	35731	FBgn0003317	sax	Human	130399	18123	ACVR1C	3	2.91	low	No	No	eggNOG, Hieranoid, OrthoDB
FBgn0003317	35731	FBgn0003317	sax	Human	91	172	ACVR1B	3	2.91	low	No	No	eggNOG, Hieranoid, OrthoDB
FBgn0003514	31554	FBgn0003514	sqh	Human	93408	29825	MYL10	3	3.01	low	No	No	eggNOG, OrthoDB, Panther
FBgn0003514	31554	FBgn0003514	sqh	Human	4633	7583	MYL2	3	3.01	low	No	No	eggNOG, OrthoDB, Panther
FBgn0003557	33379	FBgn0003557	Su(dx)	Human	64750	16809	SMURF2	3	2.94	low	No	No	eggNOG, OrthoDB, RoundUp
FBgn0003557	33379	FBgn0003557	Su(dx)	Human	57154	16807	SMURF1	3	2.94	low	No	No	eggNOG, OrthoDB, RoundUp
FBgn0004237	48535	FBgn0004237	Hrb87F	Human	3182	5034	HNRNPAB	3	2.91	low	No	No	eggNOG, OrthoDB, OrthoFinder
FBgn0004237	48535	FBgn0004237	Hrb87F	Human	3184	5036	HNRNPD	3	2.91	low	No	No	eggNOG, OrthoDB, OrthoFinder
FBgn0004237	48535	FBgn0004237	Hrb87F	Human	26528	2683	DAZAP1	3	2.91	low	No	No	OrthoDB, OrthoFinder, orthoMCL
FBgn0005632	43749	FBgn0005632	faf	Human	23358	12623	USP24	3	2.9	moderate	No	Yes	eggNOG, orthoMCL, Panther
FBgn0010300	35197	FBgn0010300	brat	Human	23321	15974	TRIM2	3	2.89	low	No	No	orthoMCL, RoundUp, TreeFam
FBgn0010328	47249	FBgn0010328	woc	Human	9205	13029	ZMYM5	3	3.04	moderate	No	Yes	Compara, OrthoDB, Panther
FBgn0013733	36542	FBgn0013733	shot	Human	645027	35236	EVPLL	3	2.93	moderate	No	Yes	Compara, eggNOG, Panther
FBgn0013733	36542	FBgn0013733	shot	Human	1832	3052	DSP	3	2.93	moderate	No	Yes	Compara, orthoMCL, Panther
FBgn0014037	40171	FBgn0014037	Su(Tpl)	Human	153562	26401	MARVELD2	3	2.93	moderate	No	Yes	Compara, eggNOG, Panther
FBgn0014037	40171	FBgn0014037	Su(Tpl)	Human	79629	26221	OCEL1	3	2.93	moderate	No	Yes	Compara, eggNOG, Panther
FBgn0014340	31518	FBgn0014340	mof	Human	10524	5275	KAT5	3	2.81	low	No	No	eggNOG, OrthoDB, orthoMCL
FBgn0014340	31518	FBgn0014340	mof	Human	11143	17016	KAT7	3	2.81	low	No	No	eggNOG, OrthoDB, orthoMCL
FBgn0015024	32221	FBgn0015024	CkIalpha	Human	102800317	-	LOC400927-CSNK1E	3	3.04	low	No	No	OrthoDB, OrthoFinder, RoundUp
FBgn0015024	32221	FBgn0015024	CkIalpha	Human	1454	2453	CSNK1E	3	2.8	low	No	No	eggNOG, OrthoFinder, orthoMCL
FBgn0016075	33726	FBgn0016075	vkg	Human	1288	2208	COL4A6	3	2.83	low	No	No	Compara, OrthoInspector, orthoMCL
FBgn0016075	33726	FBgn0016075	vkg	Human	1287	2207	COL4A5	3	2.81	low	No	No	OrthoFinder, orthoMCL, Phylome
FBgn0016696	40292	FBgn0016696	Pitslre	Human	8558	1770	CDK10	3	2.94	low	No	No	eggNOG, OrthoDB, RoundUp
FBgn0016917	42428	FBgn0016917	Stat92E	Human	6774	11364	STAT3	3	3.01	moderate	No	Yes	eggNOG, OrthoDB, Panther
FBgn0016917	42428	FBgn0016917	Stat92E	Human	6775	11365	STAT4	3	3.01	moderate	No	Yes	eggNOG, OrthoDB, Panther
FBgn0016917	42428	FBgn0016917	Stat92E	Human	6773	11363	STAT2	3	3.01	moderate	No	Yes	eggNOG, OrthoDB, Panther
FBgn0016917	42428	FBgn0016917	Stat92E	Human	6772	11362	STAT1	3	3.01	moderate	No	Yes	eggNOG, OrthoDB, Panther
FBgn0019949	37586	FBgn0019949	Cdk9	Human	8621	1733	CDK13	3	2.94	low	No	No	eggNOG, OrthoDB, RoundUp
FBgn0019949	37586	FBgn0019949	Cdk9	Human	51755	24224	CDK12	3	2.94	low	No	No	eggNOG, OrthoDB, RoundUp
FBgn0022986	37561	FBgn0022986	qkr58E-1	Human	9444	21100	QKI	3	2.86	low	No	No	eggNOG, Isobase, OrthoDB
FBgn0025455	39961	FBgn0025455	CycT	Human	8812	1596	CCNK	3	2.91	low	No	No	eggNOG, OrthoDB, OrthoFinder
FBgn0025633	31004	FBgn0025633	CG13366	Human	6525	11126	SMTN	3	2.77	low	No	No	eggNOG, Phylome, TreeFam
FBgn0025683	33171	FBgn0025683	CG3164	Human	64241	13887	ABCG8	3	2.85	low	No	No	eggNOG, Isobase, OrthoFinder
FBgn0027500	39850	FBgn0027500	spd-2	Human	55125	25515	CEP192	3	2.95	high	Yes	Yes	OrthoDB, Phylome, RoundUp
FBgn0027598	43654	FBgn0027598	cindr	Human	79729	26236	SH3D21	3	2.93	moderate	No	Yes	Compara, eggNOG, Panther
FBgn0027609	33648	FBgn0027609	morgue	Human	51619	21647	UBE2D4	3	2.95	moderate	Yes	No	eggNOG, Isobase, Panther
FBgn0029006	36999	FBgn0029006	Smurf	Human	83737	13890	ITCH	3	2.94	low	No	No	eggNOG, OrthoDB, RoundUp
FBgn0029006	36999	FBgn0029006	Smurf	Human	23327	7728	NEDD4L	3	2.94	low	No	No	eggNOG, OrthoDB, RoundUp
FBgn0029006	36999	FBgn0029006	Smurf	Human	4734	7727	NEDD4	3	2.94	low	No	No	eggNOG, OrthoDB, RoundUp
FBgn0029006	36999	FBgn0029006	Smurf	Human	11060	16804	WWP2	3	2.94	low	No	No	eggNOG, OrthoDB, RoundUp
FBgn0029874	31586	FBgn0029874	CG3342	Human	23307	23397	FKBP15	3	3.05	high	Yes	Yes	Hieranoid, Inparanoid, OrthoFinder
FBgn0030268	32049	FBgn0030268	Klp10A	Human	347240	19916	KIF24	3	2.81	moderate	No	Yes	eggNOG, OrthoDB, orthoMCL
FBgn0030344	32143	FBgn0030344	CG2025	Human	3416	5381	IDE	3	2.83	low	No	No	eggNOG, orthoMCL, RoundUp
FBgn0031318	33304	FBgn0031318	CG4887	Human	10180	9903	RBM6	3	2.99	low	No	No	Compara, Panther, TreeFam
FBgn0031622	33671	FBgn0031622	CG3251	Human	360227	33912	OTUD4P1	3	3.08	moderate	No	Yes	Inparanoid, OrthoInspector, RoundUp
FBgn0031631	33680	FBgn0031631	CG3225	Human	1665	2738	DHX15	3	2.91	low	No	No	eggNOG, OrthoDB, OrthoFinder
FBgn0032329	34528	FBgn0032329	Art8	Human	3275	5186	PRMT2	3	2.84	moderate	No	Yes	Compara, eggNOG, OrthoDB
FBgn0033028	35499	FBgn0033028	CG11665	Human	9122	10925	SLC16A4	3	3.1	low	No	No	OrthoFinder, OrthoInspector, Panther
FBgn0033160	35654	FBgn0033160	Dhx15	Human	60625	15861	DHX35	3	2.91	low	No	No	eggNOG, OrthoDB, OrthoFinder
FBgn0033160	35654	FBgn0033160	Dhx15	Human	8449	2739	DHX16	3	2.81	low	No	No	eggNOG, OrthoDB, orthoMCL
FBgn0033160	35654	FBgn0033160	Dhx15	Human	9785	17211	DHX38	3	2.81	low	No	No	eggNOG, OrthoDB, orthoMCL
FBgn0033692	36311	FBgn0033692	wash	Human	653440	31685	WASH6P	3	3.06	moderate	No	Yes	Inparanoid, Panther, Phylome
FBgn0033998	36685	FBgn0033998	row	Human	54816	25953	ZNF280D	3	2.9	moderate	No	Yes	Phylome, RoundUp, TreeFam
FBgn0034094	36800	FBgn0034094	Tsf3	Human	4241	7037	MELTF	3	2.97	low	No	No	Panther, Phylome, TreeFam
FBgn0034094	36800	FBgn0034094	Tsf3	Human	4057	6720	LTF	3	2.97	low	No	No	Panther, Phylome, TreeFam
FBgn0035103	38023	FBgn0035103	Vdup1	Human	91947	28087	ARRDC4	3	3	low	No	No	eggNOG, OrthoFinder, Panther
FBgn0035244	38193	FBgn0035244	ABCB7	Human	10058	47	ABCB6	3	2.81	low	No	No	eggNOG, OrthoDB, orthoMCL
FBgn0035707	38740	FBgn0035707	CG8368	Human	57455	24616	REXO1	3	3.01	low	No	No	eggNOG, OrthoDB, Panther
FBgn0035868	38933	FBgn0035868	CG7194	Human	115004	21367	CGAS	3	3.1	high	Yes	Yes	Hieranoid, OrthoFinder, Panther
FBgn0036702	39922	FBgn0036702	CG6512	Human	6687	11237	SPG7	3	2.81	low	No	No	eggNOG, OrthoDB, orthoMCL
FBgn0037093	40385	FBgn0037093	Cdk12	Human	1025	1780	CDK9	3	2.94	low	No	No	eggNOG, OrthoDB, RoundUp
FBgn0037517	40920	FBgn0037517	CG10086	Human	92714	28633	ARRDC1	3	3	moderate	Yes	No	eggNOG, OrthoFinder, Panther
FBgn0037517	40920	FBgn0037517	CG10086	Human	27106	25225	ARRDC2	3	2.9	moderate	Yes	No	eggNOG, OrthoFinder, OrthoInspector
FBgn0037517	40920	FBgn0037517	CG10086	Human	91947	28087	ARRDC4	3	2.9	moderate	Yes	No	eggNOG, OrthoFinder, OrthoInspector
FBgn0037517	40920	FBgn0037517	CG10086	Human	57561	29263	ARRDC3	3	2.9	moderate	Yes	No	eggNOG, OrthoFinder, OrthoInspector
FBgn0037517	40920	FBgn0037517	CG10086	Human	10628	16952	TXNIP	3	2.9	moderate	Yes	No	eggNOG, OrthoFinder, OrthoInspector
FBgn0037518	40921	FBgn0037518	CG2641	Human	92714	28633	ARRDC1	3	3	low	No	No	eggNOG, OrthoFinder, Panther
FBgn0037521	40924	FBgn0037521	CG2993	Human	92714	28633	ARRDC1	3	3	moderate	Yes	No	eggNOG, OrthoFinder, Panther
FBgn0037521	40924	FBgn0037521	CG2993	Human	27106	25225	ARRDC2	3	2.9	moderate	Yes	No	eggNOG, OrthoFinder, OrthoInspector
FBgn0037521	40924	FBgn0037521	CG2993	Human	91947	28087	ARRDC4	3	2.9	moderate	Yes	No	eggNOG, OrthoFinder, OrthoInspector
FBgn0037521	40924	FBgn0037521	CG2993	Human	57561	29263	ARRDC3	3	2.9	moderate	Yes	No	eggNOG, OrthoFinder, OrthoInspector
FBgn0037521	40924	FBgn0037521	CG2993	Human	10628	16952	TXNIP	3	2.9	moderate	Yes	No	eggNOG, OrthoFinder, OrthoInspector
FBgn0037573	40987	FBgn0037573	eIF4AIII	Human	1973	3282	EIF4A1	3	2.91	low	No	No	eggNOG, OrthoDB, OrthoFinder
FBgn0037573	40987	FBgn0037573	eIF4AIII	Human	1974	3284	EIF4A2	3	2.91	low	No	No	eggNOG, OrthoDB, OrthoFinder
FBgn0037660	41091	FBgn0037660	beag	Human	54853	25971	WDR55	3	2.94	low	No	No	OrthoDB, orthoMCL, RoundUp
FBgn0037853	41317	FBgn0037853	CG14696	Human	57561	29263	ARRDC3	3	2.91	low	No	No	eggNOG, OMA, OrthoFinder
FBgn0037856	41320	FBgn0037856	Leash	Human	92714	28633	ARRDC1	3	3	moderate	Yes	No	eggNOG, OrthoFinder, Panther
FBgn0038826	42460	FBgn0038826	Syp	Human	166863	28401	RBM46	3	2.84	moderate	No	Yes	Compara, eggNOG, OrthoDB
FBgn0038826	42460	FBgn0038826	Syp	Human	54502	30358	RBM47	3	2.84	moderate	No	Yes	Compara, eggNOG, OrthoDB
FBgn0038826	42460	FBgn0038826	Syp	Human	29974	24086	A1CF	3	2.84	moderate	No	Yes	Compara, eggNOG, OrthoDB
FBgn0038966	42635	FBgn0038966	pinta	Human	79183	16114	TTPAL	3	2.93	moderate	Yes	No	Compara, eggNOG, Panther
FBgn0038966	42635	FBgn0038966	pinta	Human	7274	12404	TTPA	3	2.93	moderate	Yes	No	Compara, eggNOG, Panther
FBgn0039213	42934	FBgn0039213	atl	Human	7732	12968	RNF112	3	2.93	moderate	No	Yes	Compara, eggNOG, Panther
FBgn0039644	43450	FBgn0039644	CG11897	Human	6833	59	ABCC8	3	2.81	low	No	No	eggNOG, OrthoDB, orthoMCL
FBgn0039644	43450	FBgn0039644	CG11897	Human	10060	60	ABCC9	3	2.81	low	No	No	eggNOG, OrthoDB, orthoMCL
FBgn0039644	43450	FBgn0039644	CG11897	Human	94160	14640	ABCC12	3	2.81	moderate	No	Yes	eggNOG, OrthoDB, orthoMCL
FBgn0039644	43450	FBgn0039644	CG11897	Human	85320	14639	ABCC11	3	2.81	moderate	No	Yes	eggNOG, OrthoDB, orthoMCL
FBgn0039644	43450	FBgn0039644	CG11897	Human	368	57	ABCC6	3	2.81	low	No	No	eggNOG, OrthoDB, orthoMCL
FBgn0039644	43450	FBgn0039644	CG11897	Human	89845	52	ABCC10	3	2.81	low	No	No	eggNOG, OrthoDB, orthoMCL
FBgn0039644	43450	FBgn0039644	CG11897	Human	1244	53	ABCC2	3	2.81	low	No	No	eggNOG, OrthoDB, orthoMCL
FBgn0039644	43450	FBgn0039644	CG11897	Human	8714	54	ABCC3	3	2.81	low	No	No	eggNOG, OrthoDB, orthoMCL
FBgn0039644	43450	FBgn0039644	CG11897	Human	4363	51	ABCC1	3	2.81	low	No	No	eggNOG, OrthoDB, orthoMCL
FBgn0039776	43620	FBgn0039776	PH4alphaEFB	Human	283208	30135	P4HA3	3	3.01	low	No	No	eggNOG, OrthoDB, Panther
FBgn0040011	3355127	FBgn0040011	Slmap	Human	80342	30766	TRAF3IP3	3	3.04	moderate	No	Yes	Compara, OrthoDB, Panther
FBgn0040236	53436	FBgn0040236	c11.1	Human	389690	42976	MROH5	3	2.94	moderate	No	Yes	Compara, Panther, Phylome
FBgn0040236	53436	FBgn0040236	c11.1	Human	642475	27814	MROH6	3	2.94	moderate	No	Yes	Compara, Panther, Phylome
FBgn0040236	53436	FBgn0040236	c11.1	Human	140699	16125	MROH8	3	2.93	moderate	No	Yes	Compara, eggNOG, Panther
FBgn0040236	53436	FBgn0040236	c11.1	Human	374977	24802	MROH7	3	2.91	moderate	No	Yes	eggNOG, Panther, Phylome
FBgn0042101	59140	FBgn0042101	CG18744	Human	92714	28633	ARRDC1	3	3	moderate	Yes	No	eggNOG, OrthoFinder, Panther
FBgn0042103	59142	FBgn0042103	CG18746	Human	92714	28633	ARRDC1	3	3	low	No	No	eggNOG, OrthoFinder, Panther
FBgn0042104	59143	FBgn0042104	CG18747	Human	92714	28633	ARRDC1	3	3	low	No	No	eggNOG, OrthoFinder, Panther
FBgn0042105	59144	FBgn0042105	CG18748	Human	92714	28633	ARRDC1	3	3	low	No	No	eggNOG, OrthoFinder, Panther
FBgn0061476	59247	FBgn0061476	Zwilch	Human	55055	25468	ZWILCH	3	2.96	high	Yes	Yes	eggNOG, Panther, TreeFam
FBgn0086347	34445	FBgn0086347	Myo31DF	Human	283446	13879	MYO1H	3	2.91	low	No	No	eggNOG, OrthoDB, OrthoFinder
FBgn0086384	32979	FBgn0086384	Mer	Human	5962	9944	RDX	3	2.91	low	No	No	eggNOG, OrthoDB, OrthoFinder
FBgn0086384	32979	FBgn0086384	Mer	Human	4478	7373	MSN	3	2.91	low	No	No	eggNOG, OrthoDB, OrthoFinder
FBgn0086444	35192	FBgn0086444	l(2)37Cb	Human	1665	2738	DHX15	3	2.81	low	No	No	eggNOG, OrthoDB, orthoMCL
FBgn0086444	35192	FBgn0086444	l(2)37Cb	Human	9785	17211	DHX38	3	2.81	low	No	No	eggNOG, OrthoDB, orthoMCL
FBgn0086712	36242	FBgn0086712	Egm	Human	28976	21497	ACAD9	3	2.86	moderate	Yes	No	eggNOG, Isobase, OrthoDB
FBgn0086895	36561	FBgn0086895	pea	Human	8449	2739	DHX16	3	2.81	low	No	No	eggNOG, OrthoDB, orthoMCL
FBgn0086895	36561	FBgn0086895	pea	Human	1665	2738	DHX15	3	2.81	low	No	No	eggNOG, OrthoDB, orthoMCL
FBgn0086895	36561	FBgn0086895	pea	Human	9785	17211	DHX38	3	2.81	low	No	No	eggNOG, OrthoDB, orthoMCL
FBgn0086906	44013	FBgn0086906	sls	Human	7273	12403	TTN	3	2.8	moderate	Yes	No	eggNOG, OrthoInspector, orthoMCL
FBgn0086906	44013	FBgn0086906	sls	Human	84033	15719	OBSCN	3	2.71	moderate	Yes	No	eggNOG, orthoMCL, Phylome
FBgn0086906	44013	FBgn0086906	sls	Human	83872	19194	HMCN1	3	2.71	high	Yes	Yes	eggNOG, orthoMCL, Phylome
FBgn0259174	39958	FBgn0259174	Nedd4	Human	64750	16809	SMURF2	3	2.94	low	No	No	eggNOG, OrthoDB, RoundUp
FBgn0259174	39958	FBgn0259174	Nedd4	Human	57154	16807	SMURF1	3	2.94	low	No	No	eggNOG, OrthoDB, RoundUp
FBgn0259174	39958	FBgn0259174	Nedd4	Human	11059	17004	WWP1	3	2.81	low	No	No	eggNOG, OrthoDB, orthoMCL
FBgn0261268	34896	FBgn0261268	Cul3	Human	8451	2554	CUL4A	3	2.91	low	No	No	eggNOG, OrthoDB, OrthoFinder
FBgn0261397	35680	FBgn0261397	didum	Human	4622	7574	MYH4	3	2.81	low	No	No	eggNOG, OrthoDB, orthoMCL
FBgn0261397	35680	FBgn0261397	didum	Human	4625	7577	MYH7	3	2.81	low	No	No	eggNOG, OrthoDB, orthoMCL
FBgn0261397	35680	FBgn0261397	didum	Human	8735	7571	MYH13	3	2.81	low	No	No	eggNOG, OrthoDB, orthoMCL
FBgn0261397	35680	FBgn0261397	didum	Human	4627	7579	MYH9	3	2.81	low	No	No	eggNOG, OrthoDB, orthoMCL
FBgn0261397	35680	FBgn0261397	didum	Human	4628	7568	MYH10	3	2.81	low	No	No	eggNOG, OrthoDB, orthoMCL
FBgn0261397	35680	FBgn0261397	didum	Human	57644	15906	MYH7B	3	2.81	low	No	No	eggNOG, OrthoDB, orthoMCL
FBgn0261397	35680	FBgn0261397	didum	Human	4619	7567	MYH1	3	2.81	low	No	No	eggNOG, OrthoDB, orthoMCL
FBgn0261397	35680	FBgn0261397	didum	Human	4621	7573	MYH3	3	2.81	low	No	No	eggNOG, OrthoDB, orthoMCL
FBgn0261397	35680	FBgn0261397	didum	Human	4626	7578	MYH8	3	2.81	low	No	No	eggNOG, OrthoDB, orthoMCL
FBgn0261397	35680	FBgn0261397	didum	Human	22989	31073	MYH15	3	2.81	low	No	No	eggNOG, OrthoDB, orthoMCL
FBgn0261397	35680	FBgn0261397	didum	Human	79784	23212	MYH14	3	2.81	low	No	No	eggNOG, OrthoDB, orthoMCL
FBgn0261397	35680	FBgn0261397	didum	Human	4624	7576	MYH6	3	2.81	low	No	No	eggNOG, OrthoDB, orthoMCL
FBgn0261397	35680	FBgn0261397	didum	Human	4620	7572	MYH2	3	2.81	low	No	No	eggNOG, OrthoDB, orthoMCL
FBgn0261545	36403	FBgn0261545	CG42663	Human	344148	29847	NCKAP5	3	2.93	high	Yes	Yes	eggNOG, OrthoFinder, RoundUp
FBgn0262114	36102	FBgn0262114	RanBPM	Human	84926	25920	SPRYD3	3	2.93	moderate	No	Yes	Compara, eggNOG, Panther
FBgn0262579	38895	FBgn0262579	Ect4	Human	147007	18085	TMEM199	3	2.79	low	No	No	Compara, eggNOG, TreeFam
FBgn0263599	39737	FBgn0263599	l(3)72Ab	Human	10973	18697	ASCC3	3	2.81	low	No	No	eggNOG, OrthoDB, orthoMCL
FBgn0263603	39764	FBgn0263603	Zn72D	Human	55342	16462	STRBP	3	3.02	moderate	No	Yes	OrthoDB, Panther, Phylome
FBgn0265042	42742	FBgn0265042	Irk1	Human	3769	6259	KCNJ13	3	2.82	moderate	No	Yes	eggNOG, OrthoDB, Phylome
FBgn0000044	37368	FBgn0000044	Act57B	Human	70	143	ACTC1	4	3.81	moderate	No	Yes	eggNOG, OrthoDB, OrthoFinder, orthoMCL
FBgn0000044	37368	FBgn0000044	Act57B	Human	72	145	ACTG2	4	3.81	moderate	No	No	eggNOG, OrthoDB, OrthoFinder, orthoMCL
FBgn0000044	37368	FBgn0000044	Act57B	Human	58	129	ACTA1	4	3.81	moderate	No	Yes	eggNOG, OrthoDB, OrthoFinder, orthoMCL
FBgn0000044	37368	FBgn0000044	Act57B	Human	59	130	ACTA2	4	3.81	moderate	No	No	eggNOG, OrthoDB, OrthoFinder, orthoMCL
FBgn0000044	37368	FBgn0000044	Act57B	Human	653269	37093	POTEI	4	3.77	moderate	No	No	eggNOG, OrthoDB, orthoMCL, TreeFam
FBgn0000044	37368	FBgn0000044	Act57B	Human	653781	37094	POTEJ	4	3.77	moderate	No	Yes	eggNOG, OrthoDB, orthoMCL, TreeFam
FBgn0000044	37368	FBgn0000044	Act57B	Human	728378	33905	POTEF	4	3.77	moderate	No	No	eggNOG, OrthoDB, orthoMCL, TreeFam
FBgn0000045	40444	FBgn0000045	Act79B	Human	70	143	ACTC1	4	3.81	moderate	No	Yes	eggNOG, OrthoDB, OrthoFinder, orthoMCL
FBgn0000045	40444	FBgn0000045	Act79B	Human	58	129	ACTA1	4	3.81	moderate	No	Yes	eggNOG, OrthoDB, OrthoFinder, orthoMCL
FBgn0000045	40444	FBgn0000045	Act79B	Human	59	130	ACTA2	4	3.81	moderate	No	No	eggNOG, OrthoDB, OrthoFinder, orthoMCL
FBgn0000045	40444	FBgn0000045	Act79B	Human	653269	37093	POTEI	4	3.77	moderate	No	No	eggNOG, OrthoDB, orthoMCL, TreeFam
FBgn0000045	40444	FBgn0000045	Act79B	Human	653781	37094	POTEJ	4	3.77	moderate	No	Yes	eggNOG, OrthoDB, orthoMCL, TreeFam
FBgn0000045	40444	FBgn0000045	Act79B	Human	728378	33905	POTEF	4	3.77	moderate	No	No	eggNOG, OrthoDB, orthoMCL, TreeFam
FBgn0000047	41885	FBgn0000047	Act88F	Human	445582	33895	POTEE	4	3.87	moderate	No	Yes	eggNOG, Homologene, OrthoDB, TreeFam
FBgn0000047	41885	FBgn0000047	Act88F	Human	70	143	ACTC1	4	3.81	moderate	No	Yes	eggNOG, OrthoDB, OrthoFinder, orthoMCL
FBgn0000047	41885	FBgn0000047	Act88F	Human	72	145	ACTG2	4	3.81	moderate	No	No	eggNOG, OrthoDB, OrthoFinder, orthoMCL
FBgn0000047	41885	FBgn0000047	Act88F	Human	58	129	ACTA1	4	3.81	moderate	No	Yes	eggNOG, OrthoDB, OrthoFinder, orthoMCL
FBgn0000047	41885	FBgn0000047	Act88F	Human	59	130	ACTA2	4	3.81	moderate	No	No	eggNOG, OrthoDB, OrthoFinder, orthoMCL
FBgn0000047	41885	FBgn0000047	Act88F	Human	653269	37093	POTEI	4	3.77	moderate	No	No	eggNOG, OrthoDB, orthoMCL, TreeFam
FBgn0000047	41885	FBgn0000047	Act88F	Human	653781	37094	POTEJ	4	3.77	moderate	No	Yes	eggNOG, OrthoDB, orthoMCL, TreeFam
FBgn0000253	36329	FBgn0000253	Cam	Human	51806	18180	CALML5	4	4.01	moderate	No	Yes	eggNOG, OrthoDB, OrthoFinder, Panther
FBgn0000253	36329	FBgn0000253	Cam	Human	805	1445	CALM2	4	3.87	moderate	No	Yes	eggNOG, OMA, OrthoFinder, TreeFam
FBgn0000299	33727	FBgn0000299	Col4a1	Human	1286	2206	COL4A4	4	3.82	moderate	No	Yes	OrthoDB, OrthoFinder, orthoMCL, Phylome
FBgn0000352	35653	FBgn0000352	cos	Human	374654	30497	KIF7	4	3.97	high	Yes	Yes	Isobase, OMA, Panther, Phylome
FBgn0001139	43162	FBgn0001139	gro	Human	79816	30788	TLE6	4	3.89	moderate	No	Yes	Compara, eggNOG, Panther, TreeFam
FBgn0001225	39075	FBgn0001225	Hsp26	Human	102724652	51901	CRYAA2	4	4.04	moderate	No	No	Hieranoid, OrthoDB, OrthoFinder, RoundUp
FBgn0001225	39075	FBgn0001225	Hsp26	Human	1409	2388	CRYAA	4	4.03	moderate	No	No	eggNOG, OrthoFinder, Panther, RoundUp
FBgn0001225	39075	FBgn0001225	Hsp26	Human	126393	26511	HSPB6	4	4.01	moderate	No	No	eggNOG, OrthoDB, OrthoFinder, Panther
FBgn0001230	42852	FBgn0001230	Hsp68	Human	3312	5241	HSPA8	4	3.81	moderate	No	No	eggNOG, OrthoDB, OrthoFinder, orthoMCL
FBgn0001230	42852	FBgn0001230	Hsp68	Human	3309	5238	HSPA5	4	3.81	moderate	No	No	eggNOG, OrthoDB, OrthoFinder, orthoMCL
FBgn0001230	42852	FBgn0001230	Hsp68	Human	3306	5235	HSPA2	4	3.81	moderate	No	No	eggNOG, OrthoDB, OrthoFinder, orthoMCL
FBgn0002413	43673	FBgn0002413	dco	Human	122011	20289	CSNK1A1L	4	3.81	moderate	No	No	eggNOG, OrthoDB, OrthoFinder, orthoMCL
FBgn0002526	38723	FBgn0002526	LanA	Human	284217	6481	LAMA1	4	3.91	moderate	No	No	eggNOG, OrthoDB, orthoMCL, Panther
FBgn0002526	38723	FBgn0002526	LanA	Human	3910	6484	LAMA4	4	3.78	moderate	No	Yes	OrthoDB, orthoMCL, Phylome, TreeFam
FBgn0003514	31554	FBgn0003514	sqh	Human	4636	7586	MYL5	4	4.01	moderate	No	No	eggNOG, OrthoDB, OrthoFinder, Panther
FBgn0003557	33379	FBgn0003557	Su(dx)	Human	23327	7728	NEDD4L	4	3.84	moderate	No	No	eggNOG, OrthoDB, orthoMCL, RoundUp
FBgn0003557	33379	FBgn0003557	Su(dx)	Human	4734	7727	NEDD4	4	3.84	moderate	No	No	eggNOG, OrthoDB, orthoMCL, RoundUp
FBgn0010246	38153	FBgn0010246	Myo61F	Human	4642	7598	MYO1D	4	3.81	moderate	No	No	eggNOG, OrthoDB, OrthoFinder, orthoMCL
FBgn0010246	38153	FBgn0010246	Myo61F	Human	4430	7596	MYO1B	4	3.81	moderate	No	No	eggNOG, OrthoDB, OrthoFinder, orthoMCL
FBgn0010246	38153	FBgn0010246	Myo61F	Human	64005	13880	MYO1G	4	3.81	moderate	No	No	eggNOG, OrthoDB, OrthoFinder, orthoMCL
FBgn0010246	38153	FBgn0010246	Myo61F	Human	4542	7600	MYO1F	4	3.81	moderate	No	No	eggNOG, OrthoDB, OrthoFinder, orthoMCL
FBgn0010246	38153	FBgn0010246	Myo61F	Human	4640	7595	MYO1A	4	3.81	moderate	No	No	eggNOG, OrthoDB, OrthoFinder, orthoMCL
FBgn0010300	35197	FBgn0010300	brat	Human	10612	10064	TRIM3	4	3.84	high	Yes	Yes	Isobase, orthoMCL, RoundUp, TreeFam
FBgn0010328	47249	FBgn0010328	woc	Human	9204	13050	ZMYM6	4	3.76	moderate	No	Yes	eggNOG, Hieranoid, orthoMCL, TreeFam
FBgn0010356	47900	FBgn0010356	Taf5	Human	27097	17304	TAF5L	4	4.04	moderate	No	No	eggNOG, OrthoDB, Panther, RoundUp
FBgn0010808	43672	FBgn0010808	l(3)03670	Human	84303	28184	CHCHD6	4	3.91	moderate	No	Yes	eggNOG, Inparanoid, OrthoFinder, TreeFam
FBgn0013733	36542	FBgn0013733	shot	Human	5339	9069	PLEC	4	3.83	moderate	No	Yes	Compara, eggNOG, orthoMCL, Panther
FBgn0014037	40171	FBgn0014037	Su(Tpl)	Human	80237	23113	ELL3	4	3.93	moderate	No	Yes	Compara, eggNOG, OrthoInspector, Panther
FBgn0016075	33726	FBgn0016075	vkg	Human	1282	2202	COL4A1	4	3.77	moderate	Yes	No	OrthoFinder, orthoMCL, Phylome, TreeFam
FBgn0027532	40448	FBgn0027532	CG7139	Human	10443	26916	N4BP2L2	4	3.86	moderate	No	Yes	Compara, eggNOG, OrthoInspector, RoundUp
FBgn0027567	39161	FBgn0027567	CG8108	Human	25792	16744	CIZ1	4	3.99	high	Yes	Yes	Isobase, Panther, Phylome, RoundUp
FBgn0031070	32993	FBgn0031070	CG12702	Human	57650	29302	CIP2A	4	3.97	high	Yes	Yes	Inparanoid, OMA, OrthoFinder, Phylome
FBgn0031622	33671	FBgn0031622	CG3251	Human	79868	30881	ALG13	4	3.86	moderate	No	No	Compara, OrthoInspector, orthoMCL, RoundUp
FBgn0031868	33964	FBgn0031868	Rat1	Human	54464	30654	XRN1	4	3.81	moderate	No	No	eggNOG, OrthoDB, OrthoFinder, orthoMCL
FBgn0032006	34127	FBgn0032006	Pvr	Human	2322	3765	FLT3	4	3.75	moderate	No	Yes	Compara, eggNOG, OrthoDB, Phylome
FBgn0032006	34127	FBgn0032006	Pvr	Human	3815	6342	KIT	4	3.75	moderate	No	Yes	Compara, eggNOG, OrthoDB, Phylome
FBgn0032455	34685	FBgn0032455	Pih1D1	Human	55011	26075	PIH1D1	4	3.93	high	Yes	Yes	eggNOG, Homologene, OrthoInspector, RoundUp
FBgn0033028	35499	FBgn0033028	CG11665	Human	201232	31037	SLC16A13	4	4.02	moderate	No	Yes	OrthoDB, OrthoFinder, Panther, Phylome
FBgn0033028	35499	FBgn0033028	CG11665	Human	9123	10924	SLC16A3	4	4.02	moderate	No	Yes	OrthoDB, OrthoFinder, Panther, Phylome
FBgn0033028	35499	FBgn0033028	CG11665	Human	9194	10928	SLC16A7	4	4.02	moderate	No	Yes	OrthoDB, OrthoFinder, Panther, Phylome
FBgn0033028	35499	FBgn0033028	CG11665	Human	151473	26417	SLC16A14	4	4.01	moderate	No	No	eggNOG, OrthoDB, OrthoFinder, Panther
FBgn0033028	35499	FBgn0033028	CG11665	Human	9120	10927	SLC16A6	4	4.01	moderate	No	Yes	eggNOG, OrthoDB, OrthoFinder, Panther
FBgn0033692	36311	FBgn0033692	wash	Human	374666	24362	WASH3P	4	4.18	moderate	No	Yes	Inparanoid, OrthoInspector, Panther, RoundUp
FBgn0033998	36685	FBgn0033998	row	Human	55609	25955	ZNF280C	4	3.83	moderate	No	Yes	Compara, Phylome, RoundUp, TreeFam
FBgn0034094	36800	FBgn0034094	Tsf3	Human	7018	11740	TF	4	3.92	moderate	Yes	No	Isobase, Panther, Phylome, TreeFam
FBgn0034958	37832	FBgn0034958	CG3907	Human	9813	29051	EFCAB14	4	3.86	high	Yes	Yes	Hieranoid, OrthoFinder, orthoMCL, TreeFam
FBgn0035103	38023	FBgn0035103	Vdup1	Human	27106	25225	ARRDC2	4	4.03	moderate	No	No	eggNOG, OrthoFinder, Panther, RoundUp
FBgn0035103	38023	FBgn0035103	Vdup1	Human	57561	29263	ARRDC3	4	4.03	moderate	No	No	eggNOG, OrthoFinder, Panther, RoundUp
FBgn0036666	39881	FBgn0036666	TSG101	Human	55293	30866	UEVLD	4	3.91	moderate	No	Yes	eggNOG, OrthoFinder, Panther, Phylome
FBgn0037465	40841	FBgn0037465	CG1105	Human	92714	28633	ARRDC1	4	3.96	moderate	No	No	eggNOG, OrthoFinder, Panther, TreeFam
FBgn0037465	40841	FBgn0037465	CG1105	Human	91947	28087	ARRDC4	4	3.95	moderate	No	Yes	eggNOG, Inparanoid, OrthoFinder, OrthoInspector
FBgn0037518	40921	FBgn0037518	CG2641	Human	91947	28087	ARRDC4	4	3.95	moderate	No	Yes	eggNOG, Inparanoid, OrthoFinder, OrthoInspector
FBgn0037853	41317	FBgn0037853	CG14696	Human	92714	28633	ARRDC1	4	4.01	moderate	Yes	No	eggNOG, OMA, OrthoFinder, Panther
FBgn0039644	43450	FBgn0039644	CG11897	Human	1080	1884	CFTR	4	3.91	moderate	No	Yes	eggNOG, OrthoFinder, Panther, Phylome
FBgn0039644	43450	FBgn0039644	CG11897	Human	10057	56	ABCC5	4	3.76	moderate	No	Yes	eggNOG, Isobase, OrthoDB, orthoMCL
FBgn0040236	53436	FBgn0040236	c11.1	Human	80133	26287	MROH9	4	3.84	moderate	No	Yes	Compara, eggNOG, Panther, Phylome
FBgn0042102	59141	FBgn0042102	CG18745	Human	92714	28633	ARRDC1	4	4.01	moderate	No	No	eggNOG, OMA, OrthoFinder, Panther
FBgn0042102	59141	FBgn0042102	CG18745	Human	27106	25225	ARRDC2	4	3.95	moderate	No	No	eggNOG, Inparanoid, OrthoFinder, OrthoInspector
FBgn0042102	59141	FBgn0042102	CG18745	Human	91947	28087	ARRDC4	4	3.95	moderate	No	Yes	eggNOG, Inparanoid, OrthoFinder, OrthoInspector
FBgn0042102	59141	FBgn0042102	CG18745	Human	10628	16952	TXNIP	4	3.95	moderate	No	No	eggNOG, Inparanoid, OrthoFinder, OrthoInspector
FBgn0042103	59142	FBgn0042103	CG18746	Human	27106	25225	ARRDC2	4	3.95	moderate	Yes	No	eggNOG, Inparanoid, OrthoFinder, OrthoInspector
FBgn0042103	59142	FBgn0042103	CG18746	Human	91947	28087	ARRDC4	4	3.95	high	Yes	Yes	eggNOG, Inparanoid, OrthoFinder, OrthoInspector
FBgn0042103	59142	FBgn0042103	CG18746	Human	57561	29263	ARRDC3	4	3.95	moderate	Yes	No	eggNOG, Inparanoid, OrthoFinder, OrthoInspector
FBgn0042103	59142	FBgn0042103	CG18746	Human	10628	16952	TXNIP	4	3.95	moderate	Yes	No	eggNOG, Inparanoid, OrthoFinder, OrthoInspector
FBgn0042104	59143	FBgn0042104	CG18747	Human	27106	25225	ARRDC2	4	3.95	moderate	Yes	No	eggNOG, Inparanoid, OrthoFinder, OrthoInspector
FBgn0042104	59143	FBgn0042104	CG18747	Human	91947	28087	ARRDC4	4	3.95	high	Yes	Yes	eggNOG, Inparanoid, OrthoFinder, OrthoInspector
FBgn0042104	59143	FBgn0042104	CG18747	Human	57561	29263	ARRDC3	4	3.95	moderate	Yes	No	eggNOG, Inparanoid, OrthoFinder, OrthoInspector
FBgn0042104	59143	FBgn0042104	CG18747	Human	10628	16952	TXNIP	4	3.95	moderate	Yes	No	eggNOG, Inparanoid, OrthoFinder, OrthoInspector
FBgn0042105	59144	FBgn0042105	CG18748	Human	27106	25225	ARRDC2	4	3.95	moderate	Yes	No	eggNOG, Inparanoid, OrthoFinder, OrthoInspector
FBgn0042105	59144	FBgn0042105	CG18748	Human	91947	28087	ARRDC4	4	3.95	high	Yes	Yes	eggNOG, Inparanoid, OrthoFinder, OrthoInspector
FBgn0042105	59144	FBgn0042105	CG18748	Human	57561	29263	ARRDC3	4	3.95	moderate	Yes	No	eggNOG, Inparanoid, OrthoFinder, OrthoInspector
FBgn0042105	59144	FBgn0042105	CG18748	Human	10628	16952	TXNIP	4	3.95	moderate	Yes	No	eggNOG, Inparanoid, OrthoFinder, OrthoInspector
FBgn0086347	34445	FBgn0086347	Myo31DF	Human	4430	7596	MYO1B	4	3.81	moderate	No	No	eggNOG, OrthoDB, OrthoFinder, orthoMCL
FBgn0086347	34445	FBgn0086347	Myo31DF	Human	4641	7597	MYO1C	4	3.81	moderate	No	No	eggNOG, OrthoDB, OrthoFinder, orthoMCL
FBgn0086347	34445	FBgn0086347	Myo31DF	Human	4640	7595	MYO1A	4	3.81	moderate	No	No	eggNOG, OrthoDB, OrthoFinder, orthoMCL
FBgn0086442	35170	FBgn0086442	mib2	Human	57534	21086	MIB1	4	3.81	moderate	No	No	eggNOG, OrthoDB, OrthoFinder, orthoMCL
FBgn0259174	39958	FBgn0259174	Nedd4	Human	83737	13890	ITCH	4	3.84	moderate	No	No	eggNOG, OrthoDB, orthoMCL, RoundUp
FBgn0259174	39958	FBgn0259174	Nedd4	Human	11060	16804	WWP2	4	3.84	moderate	No	No	eggNOG, OrthoDB, orthoMCL, RoundUp
FBgn0263603	39764	FBgn0263603	Zn72D	Human	3609	6038	ILF3	4	3.92	moderate	No	Yes	eggNOG, OrthoDB, Panther, Phylome
FBgn0265042	42742	FBgn0265042	Irk1	Human	3758	6255	KCNJ1	4	3.75	moderate	No	Yes	Compara, eggNOG, OrthoDB, Phylome
FBgn0265042	42742	FBgn0265042	Irk1	Human	3772	6261	KCNJ15	4	3.75	moderate	No	Yes	Compara, eggNOG, OrthoDB, Phylome
FBgn0265042	42742	FBgn0265042	Irk1	Human	3766	6256	KCNJ10	4	3.75	moderate	No	Yes	Compara, eggNOG, OrthoDB, Phylome
FBgn0265935	35596	FBgn0265935	coro	Human	7464	2255	CORO2A	4	3.81	moderate	No	Yes	eggNOG, OrthoDB, OrthoFinder, orthoMCL
FBgn0000044	37368	FBgn0000044	Act57B	Human	345651	17780	ACTBL2	5	4.91	moderate	No	Yes	eggNOG, OrthoDB, OrthoFinder, orthoMCL, Panther
FBgn0000045	40444	FBgn0000045	Act79B	Human	345651	17780	ACTBL2	5	4.91	moderate	No	Yes	eggNOG, OrthoDB, OrthoFinder, orthoMCL, Panther
FBgn0000045	40444	FBgn0000045	Act79B	Human	72	145	ACTG2	5	4.81	moderate	No	Yes	eggNOG, Homologene, OrthoDB, OrthoFinder, orthoMCL
FBgn0000047	41885	FBgn0000047	Act88F	Human	345651	17780	ACTBL2	5	4.91	moderate	No	Yes	eggNOG, OrthoDB, OrthoFinder, orthoMCL, Panther
FBgn0000047	41885	FBgn0000047	Act88F	Human	728378	33905	POTEF	5	4.77	moderate	No	Yes	eggNOG, Homologene, OrthoDB, orthoMCL, TreeFam
FBgn0000146	34524	FBgn0000146	aub	Human	55124	17644	PIWIL2	5	4.8	moderate	No	No	eggNOG, OrthoDB, orthoMCL, RoundUp, TreeFam
FBgn0000299	33727	FBgn0000299	Col4a1	Human	1285	2204	COL4A3	5	4.92	moderate	No	Yes	Hieranoid, Inparanoid, OrthoDB, orthoMCL, TreeFam
FBgn0000416	43662	FBgn0000416	Sap-r	Human	6439	10801	SFTPB	5	4.8	moderate	No	Yes	Compara, eggNOG, Panther, Phylome, TreeFam
FBgn0001139	43162	FBgn0001139	gro	Human	166	307	AES	5	4.88	moderate	No	Yes	Compara, eggNOG, Isobase, OrthoFinder, Panther
FBgn0001230	42852	FBgn0001230	Hsp68	Human	3305	5234	HSPA1L	5	4.91	moderate	No	No	eggNOG, OrthoDB, OrthoFinder, orthoMCL, Panther
FBgn0001230	42852	FBgn0001230	Hsp68	Human	3310	5239	HSPA6	5	4.91	moderate	No	No	eggNOG, OrthoDB, OrthoFinder, orthoMCL, Panther
FBgn0001230	42852	FBgn0001230	Hsp68	Human	3303	5232	HSPA1A	5	4.9	moderate	No	Yes	eggNOG, Homologene, OrthoFinder, orthoMCL, Panther
FBgn0001341	31010	FBgn0001341	l(1)1Bi	Human	10514	7546	MYBBP1A	5	4.84	high	Yes	Yes	eggNOG, orthoMCL, Panther, Phylome, RoundUp
FBgn0002413	43673	FBgn0002413	dco	Human	1452	2451	CSNK1A1	5	4.84	moderate	No	No	eggNOG, OrthoDB, OrthoFinder, orthoMCL, RoundUp
FBgn0002526	38723	FBgn0002526	LanA	Human	3908	6482	LAMA2	5	4.94	moderate	No	No	eggNOG, OrthoDB, orthoMCL, Panther, RoundUp
FBgn0003124	40232	FBgn0003124	polo	Human	1263	2154	PLK3	5	4.84	moderate	No	Yes	eggNOG, OrthoDB, OrthoFinder, orthoMCL, RoundUp
FBgn0003124	40232	FBgn0003124	polo	Human	10769	19699	PLK2	5	4.84	moderate	No	Yes	eggNOG, OrthoDB, OrthoFinder, orthoMCL, RoundUp
FBgn0003134	42922	FBgn0003134	Pp1alpha-96A	Human	5500	9282	PPP1CB	5	4.81	moderate	No	No	eggNOG, Hieranoid, OrthoDB, OrthoFinder, orthoMCL
FBgn0004103	49260	FBgn0004103	Pp1-87B	Human	5500	9282	PPP1CB	5	4.81	moderate	No	No	eggNOG, Hieranoid, OrthoDB, OrthoFinder, orthoMCL
FBgn0010225	46008	FBgn0010225	Gel	Human	822	1474	CAPG	5	4.85	moderate	No	Yes	Compara, eggNOG, OrthoDB, Panther, Phylome
FBgn0010246	38153	FBgn0010246	Myo61F	Human	4643	7599	MYO1E	5	4.76	moderate	No	Yes	eggNOG, Isobase, OrthoDB, OrthoFinder, orthoMCL
FBgn0010328	47249	FBgn0010328	woc	Human	54870	24713	QRICH1	5	4.89	moderate	No	Yes	Compara, eggNOG, Isobase, OrthoDB, Panther
FBgn0015024	32221	FBgn0015024	CkIalpha	Human	1453	2452	CSNK1D	5	4.84	moderate	No	No	eggNOG, OrthoDB, OrthoFinder, orthoMCL, RoundUp
FBgn0015278	39329	FBgn0015278	Pi3K68D	Human	5288	8973	PIK3C2G	5	4.77	moderate	No	Yes	eggNOG, orthoMCL, Panther, Phylome, TreeFam
FBgn0016984	37356	FBgn0016984	sktl	Human	266971	23733	PIPSL	5	5.06	moderate	No	Yes	Hieranoid, Inparanoid, OrthoInspector, Panther, Phylome
FBgn0023097	44235	FBgn0023097	bon	Human	9866	29005	TRIM66	5	4.95	moderate	No	Yes	Compara, Inparanoid, OMA, OrthoInspector, TreeFam
FBgn0024277	43974	FBgn0024277	trio	Human	115557	30275	ARHGEF25	5	5.03	moderate	No	Yes	Compara, OrthoDB, Panther, RoundUp, TreeFam
FBgn0026570	48613	FBgn0026570	CG5704	Human	94009	14408	SERHL	5	5.06	moderate	No	No	Hieranoid, Inparanoid, OrthoInspector, Panther, Phylome
FBgn0027532	40448	FBgn0027532	CG7139	Human	90634	25037	N4BP2L1	5	4.86	moderate	No	Yes	Compara, eggNOG, OrthoFinder, OrthoInspector, RoundUp
FBgn0031069	32992	FBgn0031069	Pmp70	Human	215	61	ABCD1	5	4.84	moderate	No	No	eggNOG, OrthoDB, OrthoFinder, orthoMCL, RoundUp
FBgn0031069	32992	FBgn0031069	Pmp70	Human	225	66	ABCD2	5	4.84	moderate	No	No	eggNOG, OrthoDB, OrthoFinder, orthoMCL, RoundUp
FBgn0031622	33671	FBgn0031622	CG3251	Human	54726	24949	OTUD4	5	5.06	moderate	Yes	No	Compara, OrthoFinder, OrthoInspector, Panther, RoundUp
FBgn0032006	34127	FBgn0032006	Pvr	Human	1436	2433	CSF1R	5	4.78	moderate	No	Yes	Compara, eggNOG, OrthoDB, Phylome, RoundUp
FBgn0032156	34310	FBgn0032156	CG13124	Human	57409	24030	MIF4GD	5	4.95	high	Yes	Yes	eggNOG, OrthoDB, Panther, Phylome, RoundUp
FBgn0032156	34310	FBgn0032156	CG13124	Human	9811	23925	CTIF	5	4.88	high	Yes	Yes	eggNOG, OrthoDB, Panther, Phylome, TreeFam
FBgn0033028	35499	FBgn0033028	CG11665	Human	220963	23520	SLC16A9	5	4.96	moderate	No	Yes	eggNOG, Isobase, OrthoDB, OrthoFinder, Panther
FBgn0033028	35499	FBgn0033028	CG11665	Human	162515	23093	SLC16A11	5	4.92	moderate	No	Yes	eggNOG, OrthoDB, OrthoFinder, Panther, Phylome
FBgn0033028	35499	FBgn0033028	CG11665	Human	6566	10922	SLC16A1	5	4.92	moderate	No	Yes	eggNOG, OrthoDB, OrthoFinder, Panther, Phylome
FBgn0033028	35499	FBgn0033028	CG11665	Human	9121	10926	SLC16A5	5	4.92	moderate	No	Yes	eggNOG, OrthoDB, OrthoFinder, Panther, Phylome
FBgn0033028	35499	FBgn0033028	CG11665	Human	23539	16270	SLC16A8	5	4.92	moderate	No	Yes	eggNOG, OrthoDB, OrthoFinder, Panther, Phylome
FBgn0033889	36550	FBgn0033889	CG6701	Human	4343	7200	MOV10	5	4.92	moderate	Yes	No	eggNOG, Isobase, OrthoDB, Panther, TreeFam
FBgn0033998	36685	FBgn0033998	row	Human	23126	18801	POGZ	5	4.75	high	Yes	Yes	Compara, Isobase, OrthoInspector, Phylome, TreeFam
FBgn0035103	38023	FBgn0035103	Vdup1	Human	10628	16952	TXNIP	5	5.04	moderate	No	Yes	eggNOG, OMA, OrthoFinder, Panther, RoundUp
FBgn0036372	39520	FBgn0036372	Abp1	Human	1627	2695	DBN1	5	4.95	moderate	No	Yes	Compara, OrthoDB, OrthoFinder, Panther, Phylome
FBgn0037465	40841	FBgn0037465	CG1105	Human	10628	16952	TXNIP	5	4.98	moderate	No	Yes	eggNOG, Inparanoid, OrthoFinder, OrthoInspector, RoundUp
FBgn0037518	40921	FBgn0037518	CG2641	Human	27106	25225	ARRDC2	5	4.98	moderate	Yes	No	eggNOG, Inparanoid, OrthoFinder, OrthoInspector, RoundUp
FBgn0037518	40921	FBgn0037518	CG2641	Human	57561	29263	ARRDC3	5	4.98	moderate	Yes	No	eggNOG, Inparanoid, OrthoFinder, OrthoInspector, RoundUp
FBgn0037518	40921	FBgn0037518	CG2641	Human	10628	16952	TXNIP	5	4.98	high	Yes	Yes	eggNOG, Inparanoid, OrthoFinder, OrthoInspector, RoundUp
FBgn0037550	40960	FBgn0037550	CG9667	Human	57461	29201	ISY1	5	4.86	moderate	No	Yes	eggNOG, OrthoFinder, orthoMCL, Panther, TreeFam
FBgn0041184	35085	FBgn0041184	Socs36E	Human	122809	19392	SOCS4	5	4.82	moderate	No	Yes	Compara, eggNOG, OrthoInspector, RoundUp, TreeFam
FBgn0042102	59141	FBgn0042102	CG18745	Human	57561	29263	ARRDC3	5	4.96	moderate	Yes	No	eggNOG, Inparanoid, OMA, OrthoFinder, OrthoInspector
FBgn0053217	2768951	FBgn0053217	CG33217	Human	27043	30134	PELP1	5	4.81	high	Yes	Yes	eggNOG, OrthoDB, Phylome, RoundUp, TreeFam
FBgn0082582	43633	FBgn0082582	tmod	Human	56203	6649	LMOD3	5	4.8	moderate	No	Yes	Compara, eggNOG, Panther, Phylome, TreeFam
FBgn0082582	43633	FBgn0082582	tmod	Human	25802	6647	LMOD1	5	4.8	moderate	No	Yes	Compara, eggNOG, Panther, Phylome, TreeFam
FBgn0085446	31591	FBgn0085446	CG34417	Human	342527	24764	SMTNL2	5	4.94	moderate	No	Yes	Compara, eggNOG, OrthoDB, OrthoInspector, Panther
FBgn0086347	34445	FBgn0086347	Myo31DF	Human	4542	7600	MYO1F	5	4.84	moderate	No	Yes	eggNOG, OrthoDB, OrthoFinder, orthoMCL, RoundUp
FBgn0086347	34445	FBgn0086347	Myo31DF	Human	4643	7599	MYO1E	5	4.84	moderate	No	Yes	eggNOG, OrthoDB, OrthoFinder, orthoMCL, RoundUp
FBgn0260634	42819	FBgn0260634	eIF4G2	Human	8672	3298	EIF4G3	5	4.8	moderate	Yes	No	Compara, eggNOG, Panther, Phylome, TreeFam
FBgn0260634	42819	FBgn0260634	eIF4G2	Human	1981	3296	EIF4G1	5	4.8	moderate	Yes	No	Compara, eggNOG, Panther, Phylome, TreeFam
FBgn0262716	38898	FBgn0262716	Arp3	Human	653857	37282	ACTR3C	5	4.8	moderate	No	Yes	Compara, eggNOG, Panther, Phylome, TreeFam
FBgn0265042	42742	FBgn0265042	Irk1	Human	3764	6269	KCNJ8	5	4.75	moderate	No	Yes	Compara, eggNOG, OrthoDB, OrthoFinder, Phylome
FBgn0265042	42742	FBgn0265042	Irk1	Human	3767	6257	KCNJ11	5	4.75	moderate	No	Yes	Compara, eggNOG, OrthoDB, OrthoFinder, Phylome
FBgn0265935	35596	FBgn0265935	coro	Human	10391	2256	CORO2B	5	4.84	moderate	No	Yes	eggNOG, OrthoDB, OrthoFinder, orthoMCL, RoundUp
FBgn0000045	40444	FBgn0000045	Act79B	Human	71	144	ACTG1	6	5.77	moderate	No	No	eggNOG, Hieranoid, OrthoDB, OrthoFinder, orthoMCL, TreeFam
FBgn0000047	41885	FBgn0000047	Act88F	Human	71	144	ACTG1	6	5.77	moderate	No	No	eggNOG, Hieranoid, OrthoDB, OrthoFinder, orthoMCL, TreeFam
FBgn0000299	33727	FBgn0000299	Col4a1	Human	1282	2202	COL4A1	6	6	moderate	No	Yes	Hieranoid, Inparanoid, OMA, OrthoDB, orthoMCL, RoundUp
FBgn0000299	33727	FBgn0000299	Col4a1	Human	1287	2207	COL4A5	6	5.93	moderate	No	Yes	Hieranoid, Inparanoid, OMA, OrthoDB, orthoMCL, TreeFam
FBgn0000299	33727	FBgn0000299	Col4a1	Human	1284	2203	COL4A2	6	5.85	moderate	No	Yes	Homologene, OrthoDB, OrthoFinder, orthoMCL, Phylome, RoundUp
FBgn0001225	39075	FBgn0001225	Hsp26	Human	3315	5246	HSPB1	6	5.97	moderate	No	Yes	Compara, eggNOG, OrthoDB, OrthoFinder, Panther, RoundUp
FBgn0001225	39075	FBgn0001225	Hsp26	Human	3316	5247	HSPB2	6	5.9	moderate	No	Yes	Compara, eggNOG, OrthoDB, OrthoFinder, Panther, TreeFam
FBgn0001230	42852	FBgn0001230	Hsp68	Human	3304	5233	HSPA1B	6	5.91	moderate	Yes	No	eggNOG, Homologene, OrthoDB, OrthoFinder, orthoMCL, Panther
FBgn0002413	43673	FBgn0002413	dco	Human	1454	2453	CSNK1E	6	5.86	moderate	No	Yes	eggNOG, Homologene, OrthoFinder, orthoMCL, Panther, TreeFam
FBgn0003231	35246	FBgn0003231	ref(2)P	Human	8878	11280	SQSTM1	6	6	high	Yes	Yes	Isobase, OrthoDB, OrthoFinder, Panther, Phylome, RoundUp
FBgn0004237	48535	FBgn0004237	Hrb87F	Human	10949	5030	HNRNPA0	6	5.91	moderate	No	Yes	Compara, OrthoDB, OrthoFinder, Panther, Phylome, TreeFam
FBgn0023097	44235	FBgn0023097	bon	Human	10155	16384	TRIM28	6	5.93	moderate	No	Yes	Compara, OrthoDB, OrthoFinder, OrthoInspector, RoundUp, TreeFam
FBgn0023174	39628	FBgn0023174	Prosbeta2	Human	5699	9538	PSMB10	6	5.8	moderate	No	Yes	Compara, eggNOG, OrthoFinder, Panther, Phylome, TreeFam
FBgn0023215	31331	FBgn0023215	Mnt	Human	4335	7188	MNT	6	6.03	high	Yes	Yes	Compara, OrthoDB, OrthoInspector, Panther, RoundUp, TreeFam
FBgn0027572	37028	FBgn0027572	CG5009	Human	8309	120	ACOX2	6	5.91	moderate	No	No	eggNOG, OrthoDB, OrthoFinder, OrthoInspector, orthoMCL, Panther
FBgn0027603	32910	FBgn0027603	Ulp1	Human	29843	17927	SENP1	6	5.79	moderate	Yes	No	Compara, eggNOG, OrthoInspector, orthoMCL, Panther, TreeFam
FBgn0027603	32910	FBgn0027603	Ulp1	Human	59343	23116	SENP2	6	5.75	moderate	Yes	No	Compara, eggNOG, Isobase, Panther, Phylome, TreeFam
FBgn0029134	45269	FBgn0029134	Prosbeta5	Human	122706	31963	PSMB11	6	5.81	moderate	No	No	Compara, eggNOG, OrthoDB, Panther, Phylome, TreeFam
FBgn0031057	32977	FBgn0031057	Ubqn	Human	50613	12510	UBQLN3	6	5.91	moderate	No	Yes	Compara, OrthoDB, OrthoFinder, Panther, Phylome, TreeFam
FBgn0032329	34528	FBgn0032329	Art8	Human	55170	18241	PRMT6	6	5.99	high	Yes	Yes	eggNOG, Homologene, Isobase, OrthoDB, Panther, RoundUp
FBgn0033028	35499	FBgn0033028	CG11665	Human	387700	23094	SLC16A12	6	5.92	moderate	Yes	No	eggNOG, OrthoDB, OrthoFinder, OrthoInspector, Panther, Phylome
FBgn0034246	36993	FBgn0034246	Dcr-2	Human	23405	17098	DICER1	6	5.76	moderate	Yes	No	eggNOG, Isobase, OrthoFinder, orthoMCL, Panther, Phylome
FBgn0035103	38023	FBgn0035103	Vdup1	Human	92714	28633	ARRDC1	6	5.84	high	Yes	Yes	Compara, eggNOG, Inparanoid, OrthoFinder, OrthoInspector, TreeFam
FBgn0037252	40566	FBgn0037252	CG14650	Human	85406	24581	DNAJC14	6	5.91	high	Yes	Yes	Compara, eggNOG, Isobase, OrthoInspector, Panther, RoundUp
FBgn0037465	40841	FBgn0037465	CG1105	Human	27106	25225	ARRDC2	6	5.98	high	Yes	Yes	eggNOG, Homologene, Inparanoid, OrthoFinder, OrthoInspector, RoundUp
FBgn0037465	40841	FBgn0037465	CG1105	Human	57561	29263	ARRDC3	6	5.88	high	Yes	Yes	eggNOG, Inparanoid, OrthoFinder, OrthoInspector, orthoMCL, RoundUp
FBgn0038016	41498	FBgn0038016	MBD-R2	Human	51230	16098	PHF20	6	6.02	moderate	No	Yes	Compara, Hieranoid, Inparanoid, Panther, Phylome, RoundUp
FBgn0038251	41778	FBgn0038251	Hexim	Human	124790	28591	HEXIM2	6	6.04	moderate	No	Yes	eggNOG, Inparanoid, OrthoFinder, Panther, RoundUp, TreeFam
FBgn0038400	41959	FBgn0038400	CG5903	Human	79135	28727	APOO	6	5.92	moderate	No	Yes	eggNOG, Inparanoid, OrthoFinder, Panther, Phylome, TreeFam
FBgn0039581	43374	FBgn0039581	Moca-cyp	Human	4820	7833	NKTR	6	5.86	moderate	No	Yes	eggNOG, OrthoFinder, OrthoInspector, orthoMCL, Panther, TreeFam
FBgn0039743	43576	FBgn0039743	CG7946	Human	84717	14680	HDGFL2	6	6.07	moderate	No	Yes	Compara, Inparanoid, OrthoFinder, Panther, RoundUp, TreeFam
FBgn0039743	43576	FBgn0039743	CG7946	Human	50810	24937	HDGFL3	6	5.93	moderate	No	Yes	Compara, OrthoFinder, Panther, Phylome, RoundUp, TreeFam
FBgn0039743	43576	FBgn0039743	CG7946	Human	154150	21095	HDGFL1	6	5.9	moderate	No	Yes	Compara, Hieranoid, OrthoFinder, Panther, Phylome, TreeFam
FBgn0040237	53565	FBgn0040237	bor	Human	219293	32151	ATAD3C	6	5.81	moderate	No	Yes	Compara, eggNOG, OMA, Panther, Phylome, TreeFam
FBgn0041184	35085	FBgn0041184	Socs36E	Human	9655	16852	SOCS5	6	5.79	high	Yes	Yes	Compara, eggNOG, OrthoInspector, orthoMCL, Panther, TreeFam
FBgn0052075	326192	FBgn0052075	CG32075	Human	81887	25726	LAS1L	6	5.97	high	Yes	Yes	Compara, eggNOG, OrthoDB, OrthoFinder, Panther, RoundUp
FBgn0082582	43633	FBgn0082582	tmod	Human	442721	6648	LMOD2	6	5.8	moderate	No	Yes	Compara, eggNOG, Hieranoid, Panther, Phylome, TreeFam
FBgn0085446	31591	FBgn0085446	CG34417	Human	219537	32394	SMTNL1	6	5.97	high	Yes	Yes	Compara, eggNOG, OrthoDB, OrthoInspector, Panther, RoundUp
FBgn0085446	31591	FBgn0085446	CG34417	Human	6525	11126	SMTN	6	5.97	high	Yes	Yes	Compara, eggNOG, OrthoDB, OrthoInspector, Panther, RoundUp
FBgn0261931	31905	FBgn0261931	CG42797	Human	23072	22195	HECW1	6	5.85	moderate	No	Yes	Compara, eggNOG, OrthoDB, OrthoInspector, Panther, Phylome
FBgn0262527	41911	FBgn0262527	nsl1	Human	151050	26310	KANSL1L	6	5.96	moderate	No	Yes	Compara, Inparanoid, OrthoDB, Panther, Phylome, TreeFam
FBgn0264492	48448	FBgn0264492	CkIIalpha	Human	283106	2458	CSNK2A3	6	6.1	moderate	No	Yes	Compara, Inparanoid, OMA, OrthoDB, OrthoFinder, Panther
FBgn0265042	42742	FBgn0265042	Irk1	Human	3763	6267	KCNJ6	6	5.85	moderate	No	No	Compara, Hieranoid, OrthoDB, OrthoFinder, OrthoInspector, Phylome
FBgn0265042	42742	FBgn0265042	Irk1	Human	3773	6262	KCNJ16	6	5.8	moderate	No	No	Compara, eggNOG, OrthoFinder, Panther, Phylome, TreeFam
FBgn0266570	31374	FBgn0266570	CG2982	Human	84864	19441	RIOX2	6	5.65	moderate	No	Yes	Compara, eggNOG, Isobase, OrthoDB, orthoMCL, TreeFam
FBgn0266719	43002	FBgn0266719	stac	Human	201294	23147	UNC13D	6	5.9	moderate	Yes	No	Compara, eggNOG, OrthoDB, OrthoFinder, Panther, TreeFam
FBgn0266719	43002	FBgn0266719	stac	Human	8938	948	BAIAP3	6	5.9	moderate	Yes	No	Compara, eggNOG, OrthoDB, OrthoFinder, Panther, TreeFam
FBgn0000044	37368	FBgn0000044	Act57B	Human	71	144	ACTG1	7	6.72	moderate	No	No	eggNOG, Hieranoid, Isobase, OrthoDB, OrthoFinder, orthoMCL, TreeFam
FBgn0000045	40444	FBgn0000045	Act79B	Human	60	132	ACTB	7	6.87	moderate	Yes	No	eggNOG, Hieranoid, OrthoDB, OrthoFinder, orthoMCL, Panther, TreeFam
FBgn0000047	41885	FBgn0000047	Act88F	Human	60	132	ACTB	7	6.87	moderate	Yes	No	eggNOG, Hieranoid, OrthoDB, OrthoFinder, orthoMCL, Panther, TreeFam
FBgn0000146	34524	FBgn0000146	aub	Human	143689	18444	PIWIL4	7	6.87	moderate	No	Yes	eggNOG, Hieranoid, OrthoDB, OrthoFinder, orthoMCL, Panther, TreeFam
FBgn0000146	34524	FBgn0000146	aub	Human	440822	18443	PIWIL3	7	6.87	moderate	No	No	eggNOG, Hieranoid, OrthoDB, OrthoFinder, orthoMCL, Panther, TreeFam
FBgn0000299	33727	FBgn0000299	Col4a1	Human	1288	2208	COL4A6	7	6.9	high	Yes	Yes	Inparanoid, OrthoDB, OrthoFinder, OrthoInspector, orthoMCL, Phylome, RoundUp
FBgn0001225	39075	FBgn0001225	Hsp26	Human	1410	2389	CRYAB	7	6.94	moderate	Yes	No	eggNOG, Hieranoid, OrthoDB, OrthoFinder, orthoMCL, Panther, RoundUp
FBgn0010808	43672	FBgn0010808	l(3)03670	Human	54927	21906	CHCHD3	7	6.75	high	Yes	Yes	eggNOG, Inparanoid, OrthoFinder, orthoMCL, Phylome, RoundUp, TreeFam
FBgn0014870	36889	FBgn0014870	Psi	Human	8570	6316	KHSRP	7	6.91	moderate	No	Yes	eggNOG, Inparanoid, OrthoFinder, OrthoInspector, orthoMCL, Panther, TreeFam
FBgn0025683	33171	FBgn0025683	CG3164	Human	64137	13884	ABCG4	7	6.92	moderate	Yes	No	Compara, eggNOG, Hieranoid, OrthoFinder, Panther, RoundUp, TreeFam
FBgn0025683	33171	FBgn0025683	CG3164	Human	9619	73	ABCG1	7	6.92	moderate	Yes	No	Compara, eggNOG, Hieranoid, OrthoFinder, Panther, RoundUp, TreeFam
FBgn0027598	43654	FBgn0027598	cindr	Human	23607	14258	CD2AP	7	6.82	moderate	No	Yes	Compara, eggNOG, Hieranoid, OrthoFinder, OrthoInspector, RoundUp, TreeFam
FBgn0027616	38420	FBgn0027616	YT521-B	Human	91746	30626	YTHDC1	7	6.97	high	Yes	Yes	Compara, Inparanoid, OrthoInspector, orthoMCL, Panther, RoundUp, TreeFam
FBgn0030699	32540	FBgn0030699	CG8578	Human	9208	6702	LRRFIP1	7	6.85	moderate	No	Yes	Compara, eggNOG, OrthoDB, OrthoFinder, OrthoInspector, Panther, Phylome
FBgn0030993	32905	FBgn0030993	Mec2	Human	161003	19420	STOML3	7	6.8	high	Yes	Yes	Compara, eggNOG, OrthoDB, OrthoFinder, orthoMCL, Panther, TreeFam
FBgn0030993	32905	FBgn0030993	Mec2	Human	2040	3383	STOM	7	6.8	moderate	Yes	No	Compara, eggNOG, OrthoDB, OrthoFinder, orthoMCL, Panther, TreeFam
FBgn0031057	32977	FBgn0031057	Ubqn	Human	143630	28294	UBQLNL	7	6.81	moderate	No	Yes	Compara, eggNOG, OrthoDB, OrthoFinder, Panther, Phylome, TreeFam
FBgn0032006	34127	FBgn0032006	Pvr	Human	5156	8803	PDGFRA	7	6.78	moderate	No	Yes	Compara, eggNOG, OrthoDB, OrthoFinder, OrthoInspector, Phylome, RoundUp
FBgn0032006	34127	FBgn0032006	Pvr	Human	5159	8804	PDGFRB	7	6.78	moderate	No	Yes	Compara, eggNOG, OrthoDB, OrthoFinder, OrthoInspector, Phylome, RoundUp
FBgn0034223	36965	FBgn0034223	Tes	Human	29995	6633	LMCD1	7	6.95	moderate	No	Yes	Compara, Hieranoid, Inparanoid, OrthoFinder, Panther, Phylome, TreeFam
FBgn0034230	36974	FBgn0034230	CG4853	Human	221002	24246	RASGEF1A	7	6.81	moderate	No	No	Compara, eggNOG, Hieranoid, OrthoDB, Panther, Phylome, TreeFam
FBgn0034577	37387	FBgn0034577	cpa	Human	93661	24205	CAPZA3	7	6.81	moderate	No	Yes	Compara, eggNOG, OrthoDB, OrthoFinder, Panther, Phylome, TreeFam
FBgn0034970	37851	FBgn0034970	yki	Human	25937	24042	WWTR1	7	6.91	moderate	No	Yes	Compara, Hieranoid, OrthoDB, OrthoFinder, Panther, Phylome, TreeFam
FBgn0035268	38224	FBgn0035268	CG8001	Human	347442	31811	DCAF8L2	7	7	moderate	No	Yes	Compara, Hieranoid, Inparanoid, OrthoDB, OrthoInspector, Panther, Phylome
FBgn0038400	41959	FBgn0038400	CG5903	Human	139322	24009	APOOL	7	6.95	high	Yes	Yes	eggNOG, Inparanoid, OrthoFinder, Panther, Phylome, RoundUp, TreeFam
FBgn0039743	43576	FBgn0039743	CG7946	Human	3068	4856	HDGF	7	6.93	moderate	No	Yes	Compara, OrthoFinder, OrthoInspector, Panther, Phylome, RoundUp, TreeFam
FBgn0041111	33496	FBgn0041111	lilli	Human	3899	6473	AFF3	7	6.89	moderate	No	Yes	Compara, eggNOG, Hieranoid, Inparanoid, OrthoDB, orthoMCL, Panther
FBgn0261931	31905	FBgn0261931	CG42797	Human	57520	29853	HECW2	7	6.88	high	Yes	Yes	Compara, eggNOG, OrthoDB, OrthoInspector, Panther, Phylome, RoundUp
FBgn0262579	38895	FBgn0262579	Ect4	Human	23098	17074	SARM1	7	6.87	high	Yes	Yes	Homologene, Isobase, OrthoDB, OrthoInspector, orthoMCL, Panther, Phylome
FBgn0264492	48448	FBgn0264492	CkIIalpha	Human	1459	2459	CSNK2A2	7	6.71	moderate	No	Yes	eggNOG, OrthoDB, OrthoFinder, orthoMCL, Phylome, RoundUp, TreeFam
FBgn0265042	42742	FBgn0265042	Irk1	Human	3770	6260	KCNJ14	7	6.9	moderate	No	Yes	Compara, eggNOG, Inparanoid, OrthoDB, OrthoFinder, Panther, Phylome
FBgn0265042	42742	FBgn0265042	Irk1	Human	3760	6264	KCNJ3	7	6.75	moderate	No	Yes	Compara, eggNOG, Hieranoid, OrthoDB, OrthoFinder, OrthoInspector, Phylome
FBgn0265998	43415	FBgn0265998	Doa	Human	1195	2068	CLK1	7	6.81	moderate	No	Yes	eggNOG, OrthoDB, orthoMCL, Panther, Phylome, RoundUp, TreeFam
FBgn0266696	38306	FBgn0266696	CG45186	Human	6840	11480	SVIL	7	6.98	high	Yes	Yes	Compara, Hieranoid, OrthoDB, OrthoInspector, Panther, Phylome, RoundUp
FBgn0000044	37368	FBgn0000044	Act57B	Human	60	132	ACTB	8	7.87	moderate	Yes	No	eggNOG, Hieranoid, Homologene, OrthoDB, OrthoFinder, orthoMCL, Panther, TreeFam
FBgn0000253	36329	FBgn0000253	Cam	Human	810	1452	CALML3	8	7.83	moderate	No	Yes	Compara, eggNOG, OrthoDB, OrthoFinder, orthoMCL, Panther, RoundUp, TreeFam
FBgn0000416	43662	FBgn0000416	Sap-r	Human	768239	33131	PSAPL1	8	7.85	moderate	No	Yes	Compara, eggNOG, Inparanoid, OrthoFinder, OrthoInspector, Panther, Phylome, TreeFam
FBgn0000479	31309	FBgn0000479	dnc	Human	5143	8782	PDE4C	8	7.78	moderate	No	Yes	eggNOG, Hieranoid, OrthoDB, OrthoInspector, orthoMCL, Panther, Phylome, TreeFam
FBgn0002413	43673	FBgn0002413	dco	Human	102800317	-	LOC400927-CSNK1E	8	7.93	moderate	No	Yes	Compara, Hieranoid, Inparanoid, OrthoDB, OrthoFinder, OrthoInspector, Phylome, RoundUp
FBgn0002526	38723	FBgn0002526	LanA	Human	3909	6483	LAMA3	8	7.72	moderate	No	Yes	eggNOG, OMA, OrthoDB, OrthoFinder, orthoMCL, Phylome, RoundUp, TreeFam
FBgn0003317	35731	FBgn0003317	sax	Human	94	175	ACVRL1	8	7.88	moderate	No	Yes	Compara, eggNOG, Inparanoid, OrthoInspector, Panther, Phylome, RoundUp, TreeFam
FBgn0003514	31554	FBgn0003514	sqh	Human	103910	29827	MYL12B	8	7.8	moderate	No	Yes	Compara, eggNOG, Homologene, OMA, OrthoFinder, orthoMCL, Panther, TreeFam
FBgn0014037	40171	FBgn0014037	Su(Tpl)	Human	8178	23114	ELL	8	7.97	moderate	No	Yes	Compara, eggNOG, Inparanoid, OrthoFinder, OrthoInspector, Panther, RoundUp, TreeFam
FBgn0015589	44642	FBgn0015589	Apc	Human	10297	24036	APC2	8	7.84	moderate	No	Yes	Compara, eggNOG, Hieranoid, Inparanoid, OrthoInspector, orthoMCL, Panther, TreeFam
FBgn0016696	40292	FBgn0016696	Pitslre	Human	728642	1730	CDK11A	8	8	moderate	No	Yes	eggNOG, Inparanoid, Isobase, OrthoDB, OrthoInspector, Panther, RoundUp, TreeFam
FBgn0016917	42428	FBgn0016917	Stat92E	Human	6778	11368	STAT6	8	7.86	moderate	No	Yes	Compara, eggNOG, Inparanoid, OrthoDB, OrthoInspector, Panther, Phylome, TreeFam
FBgn0020306	45655	FBgn0020306	dom	Human	57634	11958	EP400	8	7.63	moderate	No	Yes	Compara, eggNOG, Inparanoid, Isobase, orthoMCL, Phylome, RoundUp, TreeFam
FBgn0022985	37562	FBgn0022985	qkr58E-2	Human	10656	18117	KHDRBS3	8	7.85	moderate	Yes	No	Compara, eggNOG, Inparanoid, OrthoFinder, OrthoInspector, Panther, Phylome, TreeFam
FBgn0022985	37562	FBgn0022985	qkr58E-2	Human	202559	18114	KHDRBS2	8	7.85	moderate	Yes	No	Compara, eggNOG, Inparanoid, OrthoFinder, OrthoInspector, Panther, Phylome, TreeFam
FBgn0022985	37562	FBgn0022985	qkr58E-2	Human	10657	18116	KHDRBS1	8	7.85	moderate	Yes	No	Compara, eggNOG, Inparanoid, OrthoFinder, OrthoInspector, Panther, Phylome, TreeFam
FBgn0025865	42491	FBgn0025865	Cortactin	Human	3059	4844	HCLS1	8	7.87	moderate	No	Yes	Compara, eggNOG, Inparanoid, OrthoFinder, orthoMCL, Panther, RoundUp, TreeFam
FBgn0027287	32483	FBgn0027287	Gmap	Human	9321	12305	TRIP11	8	7.91	high	Yes	Yes	Compara, eggNOG, Hieranoid, Inparanoid, OrthoInspector, orthoMCL, Panther, RoundUp
FBgn0027866	40546	FBgn0027866	CG9776	Human	24149	13578	ZNF318	8	7.98	high	Yes	Yes	Compara, eggNOG, Inparanoid, OrthoDB, OrthoInspector, Panther, RoundUp, TreeFam
FBgn0030894	32791	FBgn0030894	Mvb12	Human	93343	25153	MVB12A	8	7.84	high	Yes	Yes	Compara, eggNOG, OrthoDB, OrthoFinder, Panther, Phylome, RoundUp, TreeFam
FBgn0030894	32791	FBgn0030894	Mvb12	Human	89853	23368	MVB12B	8	7.64	high	Yes	Yes	Compara, eggNOG, OrthoDB, OrthoFinder, orthoMCL, Phylome, RoundUp, TreeFam
FBgn0031318	33304	FBgn0031318	CG4887	Human	10181	9902	RBM5	8	7.85	moderate	No	No	Compara, eggNOG, Inparanoid, OMA, OrthoInspector, orthoMCL, Panther, TreeFam
FBgn0033692	36311	FBgn0033692	wash	Human	100287171	24361	WASHC1	8	8.01	high	Yes	Yes	Compara, Homologene, Inparanoid, OMA, OrthoDB, OrthoFinder, Panther, Phylome
FBgn0034223	36965	FBgn0034223	Tes	Human	26136	14620	TES	8	7.95	high	Yes	Yes	Compara, Hieranoid, Homologene, Inparanoid, OrthoFinder, Panther, Phylome, TreeFam
FBgn0034230	36974	FBgn0034230	CG4853	Human	255426	27400	RASGEF1C	8	7.71	moderate	No	No	Compara, eggNOG, Hieranoid, OrthoDB, orthoMCL, Panther, Phylome, TreeFam
FBgn0034529	37331	FBgn0034529	FAM21	Human	253725	23414	WASHC2C	8	7.89	moderate	No	Yes	eggNOG, Hieranoid, Inparanoid, OrthoFinder, orthoMCL, Panther, Phylome, RoundUp
FBgn0036886	40128	FBgn0036886	CG9300	Human	25926	24557	NOL11	8	7.92	high	Yes	Yes	eggNOG, OMA, OrthoDB, OrthoFinder, Panther, Phylome, RoundUp, TreeFam
FBgn0038016	41498	FBgn0038016	MBD-R2	Human	51105	24280	PHF20L1	8	7.82	high	Yes	Yes	Compara, eggNOG, Hieranoid, Inparanoid, orthoMCL, Panther, Phylome, RoundUp
FBgn0039644	43450	FBgn0039644	CG11897	Human	10257	55	ABCC4	8	7.75	moderate	Yes	No	Compara, eggNOG, Hieranoid, OrthoDB, OrthoFinder, orthoMCL, Panther, Phylome
FBgn0039743	43576	FBgn0039743	CG7946	Human	11168	9527	PSIP1	8	7.88	high	Yes	Yes	Compara, Inparanoid, OrthoFinder, orthoMCL, Panther, Phylome, RoundUp, TreeFam
FBgn0040236	53436	FBgn0040236	c11.1	Human	133558	26857	MROH2B	8	7.86	moderate	No	Yes	Compara, eggNOG, Inparanoid, OMA, OrthoInspector, Panther, Phylome, TreeFam
FBgn0040236	53436	FBgn0040236	c11.1	Human	339766	27936	MROH2A	8	7.86	moderate	No	Yes	Compara, eggNOG, Inparanoid, OMA, OrthoInspector, Panther, Phylome, TreeFam
FBgn0040475	39136	FBgn0040475	SH3PX1	Human	51429	14973	SNX9	8	7.91	moderate	No	Yes	Compara, eggNOG, Inparanoid, OMA, OrthoDB, OrthoInspector, Panther, Phylome
FBgn0041111	33496	FBgn0041111	lilli	Human	4299	7135	AFF1	8	7.92	moderate	No	Yes	Compara, eggNOG, Hieranoid, Inparanoid, OrthoDB, orthoMCL, Panther, RoundUp
FBgn0041111	33496	FBgn0041111	lilli	Human	27125	17869	AFF4	8	7.92	moderate	No	Yes	Compara, eggNOG, Hieranoid, Inparanoid, OrthoDB, orthoMCL, Panther, RoundUp
FBgn0042185	59223	FBgn0042185	CG18769	Human	55013	26076	MCUB	8	7.81	moderate	No	Yes	Compara, eggNOG, Hieranoid, OrthoDB, OrthoFinder, Panther, Phylome, TreeFam
FBgn0052082	39258	FBgn0052082	IRSp53	Human	80115	26203	BAIAP2L2	8	7.96	moderate	No	Yes	Compara, Hieranoid, Inparanoid, OrthoDB, OrthoInspector, Panther, Phylome, TreeFam
FBgn0262527	41911	FBgn0262527	nsl1	Human	284058	24565	KANSL1	8	7.84	high	Yes	Yes	Compara, eggNOG, Hieranoid, OrthoDB, Panther, Phylome, RoundUp, TreeFam
FBgn0263198	35173	FBgn0263198	Acn	Human	22985	17066	ACIN1	8	7.78	high	Yes	Yes	Compara, eggNOG, Inparanoid, orthoMCL, Panther, Phylome, RoundUp, TreeFam
FBgn0265042	42742	FBgn0265042	Irk1	Human	3765	6270	KCNJ9	8	7.8	moderate	No	No	Compara, eggNOG, Hieranoid, Inparanoid, OrthoDB, OrthoFinder, OrthoInspector, Phylome
FBgn0265998	43415	FBgn0265998	Doa	Human	57396	13659	CLK4	8	7.74	moderate	No	Yes	Compara, eggNOG, OrthoDB, orthoMCL, Panther, Phylome, RoundUp, TreeFam
FBgn0284255	33864	FBgn0284255	Arpc4	Human	100526693	38830	ARPC4-TTLL3	8	7.91	moderate	No	Yes	eggNOG, Hieranoid, Inparanoid, OMA, OrthoDB, OrthoInspector, Phylome, RoundUp
FBgn0000146	34524	FBgn0000146	aub	Human	9271	9007	PIWIL1	9	8.9	high	Yes	Yes	eggNOG, Hieranoid, Homologene, OrthoDB, OrthoFinder, orthoMCL, Panther, RoundUp, TreeFam
FBgn0001079	32855	FBgn0001079	fu	Human	27148	17209	STK36	9	8.82	high	Yes	Yes	Compara, eggNOG, Isobase, OrthoDB, OrthoFinder, OrthoInspector, orthoMCL, Panther, RoundUp
FBgn0001142	33172	FBgn0001142	Gs1	Human	2752	4341	GLUL	9	8.75	moderate	Yes	No	Compara, eggNOG, Homologene, Isobase, OrthoDB, OrthoFinder, orthoMCL, Panther, TreeFam
FBgn0004656	31722	FBgn0004656	fs(1)h	Human	23476	13575	BRD4	9	8.83	high	Yes	Yes	eggNOG, Inparanoid, OrthoDB, OrthoFinder, OrthoInspector, orthoMCL, Panther, Phylome, TreeFam
FBgn0004656	31722	FBgn0004656	fs(1)h	Human	6046	1103	BRD2	9	8.81	high	Yes	Yes	eggNOG, OrthoDB, OrthoFinder, OrthoInspector, orthoMCL, Panther, Phylome, RoundUp, TreeFam
FBgn0004656	31722	FBgn0004656	fs(1)h	Human	8019	1104	BRD3	9	8.81	high	Yes	Yes	eggNOG, OrthoDB, OrthoFinder, OrthoInspector, orthoMCL, Panther, Phylome, RoundUp, TreeFam
FBgn0004656	31722	FBgn0004656	fs(1)h	Human	676	1105	BRDT	9	8.81	high	Yes	Yes	eggNOG, OrthoDB, OrthoFinder, OrthoInspector, orthoMCL, Panther, Phylome, RoundUp, TreeFam
FBgn0010225	46008	FBgn0010225	Gel	Human	50853	30906	VILL	9	8.71	moderate	No	Yes	Compara, eggNOG, Hieranoid, OrthoDB, OrthoInspector, orthoMCL, Panther, Phylome, TreeFam
FBgn0010590	46058	FBgn0010590	Prosbeta1	Human	5698	9546	PSMB9	9	8.84	moderate	No	Yes	Compara, eggNOG, OrthoDB, OrthoFinder, OrthoInspector, Panther, Phylome, RoundUp, TreeFam
FBgn0013733	36542	FBgn0013733	shot	Human	667	1090	DST	9	8.94	high	Yes	Yes	Hieranoid, Homologene, Inparanoid, Isobase, OrthoInspector, orthoMCL, Panther, Phylome, RoundUp
FBgn0013733	36542	FBgn0013733	shot	Human	23499	13664	MACF1	9	8.84	high	Yes	Yes	eggNOG, Hieranoid, Inparanoid, Isobase, OrthoInspector, orthoMCL, Panther, Phylome, RoundUp
FBgn0014037	40171	FBgn0014037	Su(Tpl)	Human	22936	17064	ELL2	9	8.87	high	Yes	Yes	Compara, eggNOG, Inparanoid, OrthoFinder, OrthoInspector, orthoMCL, Panther, RoundUp, TreeFam
FBgn0014870	36889	FBgn0014870	Psi	Human	8880	4004	FUBP1	9	8.87	moderate	No	Yes	Compara, eggNOG, Inparanoid, OrthoFinder, OrthoInspector, orthoMCL, Panther, RoundUp, TreeFam
FBgn0015589	44642	FBgn0015589	Apc	Human	324	583	APC	9	8.75	high	Yes	Yes	Compara, eggNOG, Hieranoid, Inparanoid, OrthoInspector, orthoMCL, Panther, Phylome, TreeFam
FBgn0016984	37356	FBgn0016984	sktl	Human	8395	8995	PIP5K1B	9	8.75	moderate	No	No	Compara, eggNOG, Hieranoid, Inparanoid, OrthoInspector, orthoMCL, Panther, Phylome, TreeFam
FBgn0016984	37356	FBgn0016984	sktl	Human	23396	8996	PIP5K1C	9	8.75	moderate	No	No	Compara, eggNOG, Hieranoid, Inparanoid, OrthoInspector, orthoMCL, Panther, Phylome, TreeFam
FBgn0020306	45655	FBgn0020306	dom	Human	10847	16974	SRCAP	9	8.83	high	Yes	Yes	Compara, eggNOG, Hieranoid, OrthoDB, OrthoInspector, orthoMCL, Panther, RoundUp, TreeFam
FBgn0023097	44235	FBgn0023097	bon	Human	51592	16290	TRIM33	9	8.89	high	Yes	Yes	Compara, Inparanoid, OMA, OrthoDB, OrthoFinder, OrthoInspector, orthoMCL, RoundUp, TreeFam
FBgn0023097	44235	FBgn0023097	bon	Human	8805	11812	TRIM24	9	8.81	high	Yes	Yes	Compara, Inparanoid, Isobase, OMA, OrthoDB, OrthoFinder, OrthoInspector, orthoMCL, TreeFam
FBgn0024183	34885	FBgn0024183	vig	Human	22927	17062	HABP4	9	8.95	moderate	No	Yes	Compara, eggNOG, Hieranoid, Inparanoid, OrthoDB, OrthoFinder, OrthoInspector, Panther, TreeFam
FBgn0026262	43793	FBgn0026262	bip2	Human	83860	17303	TAF3	9	8.87	high	Yes	Yes	Compara, eggNOG, Inparanoid, OrthoFinder, OrthoInspector, orthoMCL, Panther, RoundUp, TreeFam
FBgn0027598	43654	FBgn0027598	cindr	Human	30011	13867	SH3KBP1	9	8.63	high	Yes	Yes	Compara, eggNOG, Hieranoid, OrthoFinder, OrthoInspector, orthoMCL, Phylome, RoundUp, TreeFam
FBgn0030268	32049	FBgn0030268	Klp10A	Human	84643	29443	KIF2B	9	8.72	moderate	No	Yes	Compara, eggNOG, OMA, OrthoDB, OrthoFinder, orthoMCL, Panther, Phylome, TreeFam
FBgn0031118	33048	FBgn0031118	RhoGAP19D	Human	57584	23725	ARHGAP21	9	8.88	moderate	No	Yes	Compara, Hieranoid, Inparanoid, OrthoDB, OrthoFinder, OrthoInspector, orthoMCL, RoundUp, TreeFam
FBgn0031478	33492	FBgn0031478	CG8814	Human	79777	23337	ACBD4	9	8.81	moderate	No	Yes	Compara, eggNOG, Hieranoid, OrthoDB, OrthoFinder, OrthoInspector, Panther, Phylome, TreeFam
FBgn0033916	36580	FBgn0033916	Usp20-33	Human	23032	20059	USP33	9	8.96	moderate	No	Yes	Compara, Inparanoid, OMA, OrthoDB, OrthoFinder, OrthoInspector, orthoMCL, Panther, TreeFam
FBgn0034073	36774	FBgn0034073	CG8414	Human	79707	26265	NOL9	9	8.74	high	Yes	Yes	Compara, eggNOG, OrthoDB, OrthoInspector, orthoMCL, Panther, Phylome, RoundUp, TreeFam
FBgn0034230	36974	FBgn0034230	CG4853	Human	153020	24881	RASGEF1B	9	8.66	moderate	Yes	No	Compara, eggNOG, Hieranoid, Isobase, OrthoDB, orthoMCL, Panther, Phylome, TreeFam
FBgn0034265	37015	FBgn0034265	Snx16	Human	64089	14980	SNX16	9	8.71	high	Yes	Yes	Compara, eggNOG, OrthoDB, OrthoFinder, OrthoInspector, orthoMCL, Panther, Phylome, TreeFam
FBgn0034447	37239	FBgn0034447	CG7744	Human	199953	33719	TMEM201	9	8.84	high	Yes	Yes	Compara, eggNOG, OrthoDB, OrthoFinder, OrthoInspector, Panther, Phylome, RoundUp, TreeFam
FBgn0035432	38407	FBgn0035432	ZnT63C	Human	55532	25355	SLC30A10	9	8.85	moderate	No	Yes	eggNOG, Isobase, OrthoDB, OrthoFinder, OrthoInspector, orthoMCL, Panther, RoundUp, TreeFam
FBgn0035707	38740	FBgn0035707	CG8368	Human	81691	24661	REXO5	9	8.74	high	Yes	Yes	Compara, eggNOG, OrthoDB, OrthoInspector, orthoMCL, Panther, Phylome, RoundUp, TreeFam
FBgn0036340	39483	FBgn0036340	SRm160	Human	10250	16638	SRRM1	9	8.82	high	Yes	Yes	Compara, eggNOG, Isobase, OMA, OrthoFinder, OrthoInspector, orthoMCL, Panther, RoundUp
FBgn0038251	41778	FBgn0038251	Hexim	Human	10614	24953	HEXIM1	9	8.8	high	Yes	Yes	eggNOG, Inparanoid, Isobase, OrthoFinder, orthoMCL, Panther, Phylome, RoundUp, TreeFam
FBgn0038473	42060	FBgn0038473	Ns1	Human	26354	29931	GNL3	9	8.74	moderate	No	Yes	Compara, eggNOG, OrthoDB, OrthoFinder, orthoMCL, Panther, Phylome, RoundUp, TreeFam
FBgn0041111	33496	FBgn0041111	lilli	Human	2334	3776	AFF2	9	8.92	high	Yes	Yes	Compara, eggNOG, Hieranoid, Inparanoid, OrthoDB, OrthoInspector, orthoMCL, Panther, RoundUp
FBgn0052082	39258	FBgn0052082	IRSp53	Human	55971	21649	BAIAP2L1	9	8.96	moderate	No	Yes	Compara, Hieranoid, Inparanoid, OrthoDB, OrthoFinder, OrthoInspector, Panther, Phylome, TreeFam
FBgn0053193	252554	FBgn0053193	sav	Human	60485	17795	SAV1	9	8.74	high	Yes	Yes	Compara, eggNOG, OrthoDB, OrthoInspector, orthoMCL, Panther, Phylome, RoundUp, TreeFam
FBgn0262127	41783	FBgn0262127	kibra	Human	55841	29237	WWC3	9	8.86	moderate	No	Yes	Compara, Hieranoid, Inparanoid, OMA, OrthoInspector, orthoMCL, Panther, Phylome, TreeFam
FBgn0265042	42742	FBgn0265042	Irk1	Human	100134444	39080	KCNJ18	9	8.93	moderate	No	Yes	Compara, eggNOG, Inparanoid, OrthoDB, OrthoFinder, OrthoInspector, Panther, Phylome, RoundUp
FBgn0265042	42742	FBgn0265042	Irk1	Human	3761	6265	KCNJ4	9	8.93	moderate	No	No	Compara, eggNOG, Inparanoid, OrthoDB, OrthoFinder, OrthoInspector, Panther, Phylome, RoundUp
FBgn0265042	42742	FBgn0265042	Irk1	Human	3768	6258	KCNJ12	9	8.92	moderate	No	No	Compara, eggNOG, Inparanoid, OrthoDB, OrthoFinder, OrthoInspector, orthoMCL, Panther, RoundUp
FBgn0265042	42742	FBgn0265042	Irk1	Human	3762	6266	KCNJ5	9	8.83	moderate	No	Yes	Compara, eggNOG, Hieranoid, Inparanoid, OrthoDB, OrthoFinder, OrthoInspector, Phylome, RoundUp
FBgn0265998	43415	FBgn0265998	Doa	Human	1198	2071	CLK3	9	8.74	moderate	No	Yes	Compara, eggNOG, OrthoDB, OrthoInspector, orthoMCL, Panther, Phylome, RoundUp, TreeFam
FBgn0000253	36329	FBgn0000253	Cam	Human	801	1442	CALM1	10	9.69	moderate	No	Yes	Compara, eggNOG, Isobase, OMA, OrthoDB, OrthoFinder, OrthoInspector, orthoMCL, RoundUp, TreeFam
FBgn0000317	34882	FBgn0000317	ck	Human	4648	7607	MYO7B	10	9.66	moderate	No	Yes	Compara, eggNOG, Hieranoid, Isobase, OrthoDB, OrthoFinder, orthoMCL, Panther, Phylome, TreeFam
FBgn0000479	31309	FBgn0000479	dnc	Human	5141	8780	PDE4A	10	9.72	moderate	No	Yes	Compara, eggNOG, Hieranoid, OMA, OrthoDB, OrthoInspector, orthoMCL, Panther, Phylome, TreeFam
FBgn0000499	32078	FBgn0000499	dsh	Human	1855	3084	DVL1	10	9.83	moderate	No	Yes	eggNOG, Hieranoid, Inparanoid, OrthoDB, OrthoFinder, OrthoInspector, orthoMCL, Panther, Phylome, TreeFam
FBgn0000667	31166	FBgn0000667	Actn	Human	89	165	ACTN3	10	10.04	moderate	No	Yes	Compara, Hieranoid, Inparanoid, OMA, OrthoDB, OrthoFinder, OrthoInspector, Panther, Phylome, RoundUp
FBgn0002924	43517	FBgn0002924	ncd	Human	3833	6389	KIFC1	10	9.76	high	Yes	Yes	Compara, eggNOG, Homologene, Inparanoid, OrthoDB, OrthoInspector, orthoMCL, Panther, Phylome, TreeFam
FBgn0003268	43719	FBgn0003268	rod	Human	9735	17255	KNTC1	10	9.88	high	Yes	Yes	Compara, eggNOG, Inparanoid, OMA, OrthoFinder, OrthoInspector, orthoMCL, Panther, RoundUp, TreeFam
FBgn0003557	33379	FBgn0003557	Su(dx)	Human	11060	16804	WWP2	10	9.69	moderate	No	Yes	Compara, eggNOG, Hieranoid, Inparanoid, OrthoDB, OrthoInspector, orthoMCL, Phylome, RoundUp, TreeFam
FBgn0004237	48535	FBgn0004237	Hrb87F	Human	144983	27067	HNRNPA1L2	10	9.91	moderate	No	Yes	Compara, eggNOG, Hieranoid, Inparanoid, OMA, OrthoDB, OrthoFinder, OrthoInspector, Panther, Phylome
FBgn0004237	48535	FBgn0004237	Hrb87F	Human	220988	24941	HNRNPA3	10	9.88	moderate	No	Yes	eggNOG, Hieranoid, Inparanoid, OMA, OrthoDB, OrthoFinder, OrthoInspector, orthoMCL, Panther, Phylome
FBgn0004924	32458	FBgn0004924	Top1	Human	116447	29787	TOP1MT	10	9.74	moderate	No	Yes	Compara, eggNOG, Hieranoid, OrthoDB, OrthoInspector, orthoMCL, Panther, Phylome, RoundUp, TreeFam
FBgn0010246	38153	FBgn0010246	Myo61F	Human	283446	13879	MYO1H	10	9.86	moderate	No	Yes	Compara, eggNOG, Hieranoid, Inparanoid, OrthoDB, OrthoFinder, OrthoInspector, Panther, Phylome, TreeFam
FBgn0010328	47249	FBgn0010328	woc	Human	9203	13054	ZMYM3	10	9.78	moderate	No	Yes	Compara, eggNOG, Hieranoid, Inparanoid, OrthoInspector, orthoMCL, Panther, Phylome, RoundUp, TreeFam
FBgn0010328	47249	FBgn0010328	woc	Human	7750	12989	ZMYM2	10	9.76	moderate	No	Yes	Compara, eggNOG, Hieranoid, Inparanoid, OrthoDB, OrthoInspector, orthoMCL, Panther, Phylome, TreeFam
FBgn0011771	40462	FBgn0011771	Hem	Human	3071	4862	NCKAP1L	10	9.71	moderate	No	Yes	Compara, eggNOG, Hieranoid, OrthoDB, OrthoFinder, OrthoInspector, orthoMCL, Panther, Phylome, TreeFam
FBgn0014870	36889	FBgn0014870	Psi	Human	8939	4005	FUBP3	10	9.98	high	Yes	Yes	Compara, eggNOG, Homologene, Inparanoid, OrthoDB, OrthoFinder, OrthoInspector, Panther, RoundUp, TreeFam
FBgn0016696	40292	FBgn0016696	Pitslre	Human	984	1729	CDK11B	10	9.88	high	Yes	Yes	Compara, eggNOG, Hieranoid, Inparanoid, OrthoDB, OrthoInspector, orthoMCL, Panther, RoundUp, TreeFam
FBgn0016984	37356	FBgn0016984	sktl	Human	8394	8994	PIP5K1A	10	9.7	moderate	Yes	No	Compara, eggNOG, Hieranoid, Inparanoid, Isobase, OrthoInspector, orthoMCL, Panther, Phylome, TreeFam
FBgn0022986	37561	FBgn0022986	qkr58E-1	Human	10657	18116	KHDRBS1	10	9.86	moderate	No	No	Compara, eggNOG, Hieranoid, Inparanoid, OrthoDB, OrthoFinder, OrthoInspector, Panther, Phylome, TreeFam
FBgn0023514	31146	FBgn0023514	CG14805	Human	57418	17956	WDR18	10	9.98	high	Yes	Yes	Compara, Homologene, Inparanoid, OMA, OrthoFinder, OrthoInspector, orthoMCL, Panther, RoundUp, TreeFam
FBgn0025633	31004	FBgn0025633	CG13366	Human	23384	29022	SPECC1L	10	9.86	high	Yes	Yes	eggNOG, Hieranoid, Inparanoid, OMA, OrthoInspector, orthoMCL, Panther, Phylome, RoundUp, TreeFam
FBgn0025633	31004	FBgn0025633	CG13366	Human	92521	30615	SPECC1	10	9.76	high	Yes	Yes	Compara, eggNOG, Hieranoid, Inparanoid, OMA, OrthoInspector, orthoMCL, Panther, Phylome, TreeFam
FBgn0026570	48613	FBgn0026570	CG5704	Human	253190	29446	SERHL2	10	9.86	moderate	Yes	No	Compara, eggNOG, Hieranoid, Inparanoid, OrthoDB, OrthoFinder, OrthoInspector, Panther, Phylome, TreeFam
FBgn0027490	34172	FBgn0027490	D12	Human	55689	25489	YEATS2	10	9.87	high	Yes	Yes	Compara, eggNOG, Hieranoid, Inparanoid, OrthoFinder, OrthoInspector, orthoMCL, Panther, RoundUp, TreeFam
FBgn0027621	32938	FBgn0027621	Pfrx	Human	5208	8873	PFKFB2	10	9.76	moderate	No	Yes	Compara, eggNOG, Hieranoid, Inparanoid, OrthoDB, OrthoInspector, orthoMCL, Panther, Phylome, TreeFam
FBgn0027621	32938	FBgn0027621	Pfrx	Human	5207	8872	PFKFB1	10	9.69	moderate	No	Yes	Compara, eggNOG, Hieranoid, Inparanoid, OrthoDB, OrthoInspector, orthoMCL, Phylome, RoundUp, TreeFam
FBgn0027621	32938	FBgn0027621	Pfrx	Human	5210	8875	PFKFB4	10	9.61	moderate	No	Yes	Compara, eggNOG, Hieranoid, Inparanoid, Isobase, OrthoDB, OrthoInspector, orthoMCL, Phylome, TreeFam
FBgn0029941	31662	FBgn0029941	CG1677	Human	124245	25091	ZC3H18	10	9.8	high	Yes	Yes	Compara, eggNOG, Hieranoid, Inparanoid, Isobase, OMA, OrthoInspector, orthoMCL, Panther, TreeFam
FBgn0030268	32049	FBgn0030268	Klp10A	Human	11004	6393	KIF2C	10	9.76	moderate	No	Yes	Compara, eggNOG, Inparanoid, OrthoDB, OrthoFinder, OrthoInspector, orthoMCL, Panther, Phylome, TreeFam
FBgn0030344	32143	FBgn0030344	CG2025	Human	4898	7995	NRDC	10	9.86	high	Yes	Yes	eggNOG, Hieranoid, Inparanoid, OMA, OrthoInspector, orthoMCL, Panther, Phylome, RoundUp, TreeFam
FBgn0030468	32282	FBgn0030468	CG1622	Human	55119	25512	PRPF38B	10	9.88	high	Yes	Yes	Compara, eggNOG, Inparanoid, OrthoDB, OrthoFinder, OrthoInspector, orthoMCL, Panther, RoundUp, TreeFam
FBgn0031118	33048	FBgn0031118	RhoGAP19D	Human	57636	29293	ARHGAP23	10	9.78	high	Yes	Yes	Compara, eggNOG, Hieranoid, Inparanoid, OrthoDB, OrthoFinder, OrthoInspector, orthoMCL, RoundUp, TreeFam
FBgn0031318	33304	FBgn0031318	CG4887	Human	8241	9896	RBM10	10	9.8	moderate	Yes	No	Compara, eggNOG, Homologene, Inparanoid, Isobase, OMA, OrthoInspector, orthoMCL, Panther, TreeFam
FBgn0032006	34127	FBgn0032006	Pvr	Human	3791	6307	KDR	10	9.76	moderate	No	Yes	Compara, eggNOG, Hieranoid, Inparanoid, OrthoDB, OrthoInspector, orthoMCL, Panther, Phylome, TreeFam
FBgn0032006	34127	FBgn0032006	Pvr	Human	2324	3767	FLT4	10	9.76	moderate	No	Yes	Compara, eggNOG, Hieranoid, Inparanoid, OrthoDB, OrthoInspector, orthoMCL, Panther, Phylome, TreeFam
FBgn0032409	34633	FBgn0032409	Ced-12	Human	79767	17289	ELMO3	10	9.75	moderate	No	Yes	Compara, eggNOG, Hieranoid, Inparanoid, OrthoFinder, OrthoInspector, orthoMCL, Panther, Phylome, TreeFam
FBgn0033166	35660	FBgn0033166	Eaf	Human	55840	23115	EAF2	10	9.89	high	Yes	Yes	Compara, eggNOG, Inparanoid, OrthoDB, OrthoFinder, OrthoInspector, Panther, Phylome, RoundUp, TreeFam
FBgn0033166	35660	FBgn0033166	Eaf	Human	85403	20907	EAF1	10	9.79	high	Yes	Yes	Compara, eggNOG, Inparanoid, OrthoDB, OrthoFinder, orthoMCL, Panther, Phylome, RoundUp, TreeFam
FBgn0033741	36365	FBgn0033741	CG8545	Human	4839	7867	NOP2	10	9.78	high	Yes	Yes	Compara, eggNOG, Hieranoid, Inparanoid, OrthoInspector, orthoMCL, Panther, Phylome, RoundUp, TreeFam
FBgn0034529	37331	FBgn0034529	FAM21	Human	387680	23416	WASHC2A	10	9.91	high	Yes	Yes	eggNOG, Hieranoid, Inparanoid, OMA, OrthoDB, OrthoFinder, orthoMCL, Panther, Phylome, RoundUp
FBgn0034971	37852	FBgn0034971	CG3209	Human	84803	28157	GPAT3	10	9.96	moderate	No	Yes	eggNOG, Hieranoid, Inparanoid, OrthoDB, OrthoFinder, OrthoInspector, Panther, Phylome, RoundUp, TreeFam
FBgn0034975	37859	FBgn0034975	enok	Human	23522	17582	KAT6B	10	9.75	moderate	No	Yes	Compara, eggNOG, Hieranoid, Inparanoid, OrthoFinder, OrthoInspector, orthoMCL, Panther, Phylome, TreeFam
FBgn0035060	37961	FBgn0035060	Eps-15	Human	2060	3419	EPS15	10	9.88	moderate	No	Yes	Compara, eggNOG, Inparanoid, OrthoDB, OrthoFinder, OrthoInspector, orthoMCL, Panther, RoundUp, TreeFam
FBgn0035268	38224	FBgn0035268	CG8001	Human	139425	31810	DCAF8L1	10	9.76	moderate	No	Yes	Compara, eggNOG, Hieranoid, Inparanoid, OrthoDB, OrthoInspector, orthoMCL, Panther, Phylome, TreeFam
FBgn0037550	40960	FBgn0037550	CG9667	Human	100534599	42969	ISY1-RAB43	10	9.94	high	Yes	Yes	Compara, Hieranoid, Homologene, Inparanoid, OMA, OrthoDB, OrthoFinder, OrthoInspector, Phylome, RoundUp
FBgn0037710	41152	FBgn0037710	CG9393	Human	345778	24812	MTX3	10	9.89	moderate	No	Yes	Compara, eggNOG, Hieranoid, Inparanoid, OrthoDB, OrthoFinder, Panther, Phylome, RoundUp, TreeFam
FBgn0037737	41185	FBgn0037737	Pnn	Human	5411	9162	PNN	10	9.74	high	Yes	Yes	Compara, eggNOG, OrthoDB, OrthoFinder, OrthoInspector, orthoMCL, Panther, Phylome, RoundUp, TreeFam
FBgn0039488	43267	FBgn0039488	CG6066	Human	222698	21584	NKAPL	10	9.79	moderate	No	Yes	Compara, eggNOG, Inparanoid, OrthoDB, OrthoInspector, orthoMCL, Panther, Phylome, RoundUp, TreeFam
FBgn0039581	43374	FBgn0039581	Moca-cyp	Human	9360	14650	PPIG	10	9.88	high	Yes	Yes	Compara, eggNOG, Inparanoid, OMA, OrthoFinder, OrthoInspector, orthoMCL, Panther, RoundUp, TreeFam
FBgn0044323	34096	FBgn0044323	Cka	Human	29888	15721	STRN4	10	9.76	moderate	No	Yes	Compara, eggNOG, Inparanoid, OrthoDB, OrthoFinder, OrthoInspector, orthoMCL, Panther, Phylome, TreeFam
FBgn0052685	31942	FBgn0052685	ZAP3	Human	56252	17798	YLPM1	10	9.88	high	Yes	Yes	Compara, eggNOG, Hieranoid, Inparanoid, OrthoDB, OrthoInspector, orthoMCL, Panther, RoundUp, TreeFam
FBgn0082582	43633	FBgn0082582	tmod	Human	29765	11874	TMOD4	10	9.93	moderate	No	Yes	Compara, eggNOG, Hieranoid, Inparanoid, OMA, OrthoFinder, OrthoInspector, Panther, Phylome, RoundUp
FBgn0082582	43633	FBgn0082582	tmod	Human	29767	11872	TMOD2	10	9.93	moderate	No	Yes	Compara, eggNOG, Hieranoid, Inparanoid, OMA, OrthoFinder, OrthoInspector, Panther, Phylome, RoundUp
FBgn0082582	43633	FBgn0082582	tmod	Human	29766	11873	TMOD3	10	9.93	moderate	No	Yes	Compara, eggNOG, Hieranoid, Inparanoid, OMA, OrthoFinder, OrthoInspector, Panther, Phylome, RoundUp
FBgn0261385	35696	FBgn0261385	scra	Human	54443	14082	ANLN	10	9.76	high	Yes	Yes	Compara, eggNOG, Hieranoid, Inparanoid, OrthoDB, OrthoInspector, orthoMCL, Panther, Phylome, TreeFam
FBgn0261618	53567	FBgn0261618	larp	Human	55132	24704	LARP1B	10	9.89	high	Yes	Yes	Compara, eggNOG, Hieranoid, Inparanoid, OrthoDB, OrthoInspector, Panther, Phylome, RoundUp, TreeFam
FBgn0261618	53567	FBgn0261618	larp	Human	23367	29531	LARP1	10	9.89	high	Yes	Yes	Compara, eggNOG, Hieranoid, Inparanoid, OrthoDB, OrthoInspector, Panther, Phylome, RoundUp, TreeFam
FBgn0263987	31459	FBgn0263987	spoon	Human	8165	367	AKAP1	10	9.71	high	Yes	Yes	Compara, eggNOG, Inparanoid, Isobase, OrthoDB, OrthoInspector, orthoMCL, Panther, Phylome, TreeFam
FBgn0265042	42742	FBgn0265042	Irk1	Human	3759	6263	KCNJ2	10	9.8	high	Yes	Yes	Compara, eggNOG, Homologene, Inparanoid, OrthoDB, OrthoFinder, OrthoInspector, orthoMCL, Panther, Phylome
FBgn0267791	43862	FBgn0267791	HnRNP-K	Human	3190	5044	HNRNPK	10	10.01	high	Yes	Yes	Inparanoid, Isobase, OMA, OrthoDB, OrthoFinder, OrthoInspector, orthoMCL, Panther, RoundUp, TreeFam
FBgn0284255	33864	FBgn0284255	Arpc4	Human	10093	707	ARPC4	10	9.83	high	Yes	Yes	Compara, eggNOG, Homologene, OMA, OrthoFinder, OrthoInspector, orthoMCL, Panther, RoundUp, TreeFam
FBgn0000253	36329	FBgn0000253	Cam	Human	808	1449	CALM3	11	10.69	high	Yes	Yes	Compara, eggNOG, Hieranoid, Inparanoid, OMA, OrthoFinder, OrthoInspector, orthoMCL, Phylome, RoundUp, TreeFam
FBgn0000416	43662	FBgn0000416	Sap-r	Human	5660	9498	PSAP	11	10.78	high	Yes	Yes	Compara, eggNOG, Homologene, Inparanoid, OrthoFinder, OrthoInspector, orthoMCL, Panther, Phylome, RoundUp, TreeFam
FBgn0000479	31309	FBgn0000479	dnc	Human	5144	8783	PDE4D	11	10.74	high	Yes	Yes	Compara, eggNOG, Hieranoid, Homologene, OrthoDB, OrthoInspector, orthoMCL, Panther, Phylome, RoundUp, TreeFam
FBgn0000479	31309	FBgn0000479	dnc	Human	5142	8781	PDE4B	11	10.69	high	Yes	Yes	Compara, eggNOG, Hieranoid, Isobase, OrthoDB, OrthoInspector, orthoMCL, Panther, Phylome, RoundUp, TreeFam
FBgn0000662	36527	FBgn0000662	fl(2)d	Human	9589	16846	WTAP	11	10.79	high	Yes	Yes	Compara, eggNOG, Inparanoid, OrthoDB, OrthoFinder, OrthoInspector, orthoMCL, Panther, Phylome, RoundUp, TreeFam
FBgn0001139	43162	FBgn0001139	gro	Human	7088	11837	TLE1	11	10.76	moderate	No	Yes	Compara, eggNOG, Hieranoid, Inparanoid, OrthoDB, OrthoFinder, OrthoInspector, orthoMCL, Panther, Phylome, TreeFam
FBgn0001139	43162	FBgn0001139	gro	Human	7089	11838	TLE2	11	10.76	moderate	No	Yes	Compara, eggNOG, Hieranoid, Inparanoid, OrthoDB, OrthoFinder, OrthoInspector, orthoMCL, Panther, Phylome, TreeFam
FBgn0002973	34263	FBgn0002973	numb	Human	8650	8060	NUMB	11	10.86	moderate	No	Yes	eggNOG, Hieranoid, Inparanoid, OrthoDB, OrthoFinder, OrthoInspector, orthoMCL, Panther, Phylome, RoundUp, TreeFam
FBgn0003048	31204	FBgn0003048	pcx	Human	80003	8736	PCNX2	11	10.74	moderate	No	Yes	Compara, eggNOG, Hieranoid, OrthoDB, OrthoFinder, OrthoInspector, orthoMCL, Panther, Phylome, RoundUp, TreeFam
FBgn0003134	42922	FBgn0003134	Pp1alpha-96A	Human	5501	9283	PPP1CC	11	10.84	moderate	No	No	eggNOG, Homologene, Inparanoid, OMA, OrthoDB, OrthoFinder, OrthoInspector, orthoMCL, Panther, Phylome, TreeFam
FBgn0004237	48535	FBgn0004237	Hrb87F	Human	3178	5031	HNRNPA1	11	10.81	moderate	No	Yes	Compara, eggNOG, Hieranoid, Inparanoid, OMA, OrthoDB, OrthoFinder, OrthoInspector, orthoMCL, Panther, Phylome
FBgn0004643	47874	FBgn0004643	Zw10	Human	9183	13194	ZW10	11	10.79	high	Yes	Yes	Compara, eggNOG, Hieranoid, Inparanoid, OMA, OrthoInspector, orthoMCL, Panther, Phylome, RoundUp, TreeFam
FBgn0010225	46008	FBgn0010225	Gel	Human	7429	12690	VIL1	11	10.76	moderate	No	Yes	Compara, eggNOG, Hieranoid, Inparanoid, OrthoDB, OrthoFinder, OrthoInspector, orthoMCL, Panther, Phylome, TreeFam
FBgn0010328	47249	FBgn0010328	woc	Human	9202	13055	ZMYM4	11	10.79	high	Yes	Yes	Compara, eggNOG, Hieranoid, Inparanoid, OrthoDB, OrthoInspector, orthoMCL, Panther, Phylome, RoundUp, TreeFam
FBgn0011020	40859	FBgn0011020	Sas-4	Human	55835	17272	CENPJ	11	10.74	high	Yes	Yes	Compara, eggNOG, Inparanoid, Isobase, OrthoDB, OrthoInspector, orthoMCL, Panther, Phylome, RoundUp, TreeFam
FBgn0014024	31448	FBgn0014024	Rnp4F	Human	9733	16860	SART3	11	10.79	high	Yes	Yes	Compara, eggNOG, Hieranoid, Inparanoid, OrthoDB, OrthoInspector, orthoMCL, Panther, Phylome, RoundUp, TreeFam
FBgn0015278	39329	FBgn0015278	Pi3K68D	Human	5287	8972	PIK3C2B	11	10.79	moderate	No	Yes	Compara, eggNOG, Hieranoid, Inparanoid, OMA, OrthoInspector, orthoMCL, Panther, Phylome, RoundUp, TreeFam
FBgn0016917	42428	FBgn0016917	Stat92E	Human	6776	11366	STAT5A	11	10.79	moderate	No	Yes	Compara, eggNOG, Hieranoid, Inparanoid, OrthoDB, OrthoInspector, orthoMCL, Panther, Phylome, RoundUp, TreeFam
FBgn0022986	37561	FBgn0022986	qkr58E-1	Human	202559	18114	KHDRBS2	11	10.76	moderate	No	No	Compara, eggNOG, Hieranoid, Inparanoid, OrthoDB, OrthoFinder, OrthoInspector, orthoMCL, Panther, Phylome, TreeFam
FBgn0024277	43974	FBgn0024277	trio	Human	8997	4814	KALRN	11	10.89	moderate	No	Yes	Compara, eggNOG, Inparanoid, OMA, OrthoDB, OrthoFinder, OrthoInspector, orthoMCL, Panther, RoundUp, TreeFam
FBgn0025455	39961	FBgn0025455	CycT	Human	905	1600	CCNT2	11	10.79	moderate	No	Yes	Compara, eggNOG, Inparanoid, OrthoDB, OrthoFinder, OrthoInspector, orthoMCL, Panther, Phylome, RoundUp, TreeFam
FBgn0025865	42491	FBgn0025865	Cortactin	Human	2017	3338	CTTN	11	10.88	high	Yes	Yes	Compara, eggNOG, Homologene, Inparanoid, OMA, OrthoFinder, OrthoInspector, orthoMCL, Panther, RoundUp, TreeFam
FBgn0027532	40448	FBgn0027532	CG7139	Human	55728	29851	N4BP2	11	10.73	high	Yes	Yes	Compara, eggNOG, Hieranoid, Inparanoid, Isobase, OrthoInspector, orthoMCL, Panther, Phylome, RoundUp, TreeFam
FBgn0027621	32938	FBgn0027621	Pfrx	Human	5209	8874	PFKFB3	11	10.79	high	Yes	Yes	Compara, eggNOG, Hieranoid, Inparanoid, OrthoDB, OrthoInspector, orthoMCL, Panther, Phylome, RoundUp, TreeFam
FBgn0029999	31731	FBgn0029999	CG1575	Human	54881	25988	TEX10	11	10.74	high	Yes	Yes	Compara, eggNOG, Hieranoid, OrthoDB, OrthoFinder, OrthoInspector, orthoMCL, Panther, Phylome, RoundUp, TreeFam
FBgn0030699	32540	FBgn0030699	CG8578	Human	9209	6703	LRRFIP2	11	10.79	high	Yes	Yes	Compara, eggNOG, Hieranoid, Inparanoid, OrthoDB, OrthoInspector, orthoMCL, Panther, Phylome, RoundUp, TreeFam
FBgn0031478	33492	FBgn0031478	CG8814	Human	91452	23338	ACBD5	11	10.76	high	Yes	Yes	Compara, eggNOG, Hieranoid, Inparanoid, OrthoDB, OrthoFinder, OrthoInspector, orthoMCL, Panther, Phylome, TreeFam
FBgn0032006	34127	FBgn0032006	Pvr	Human	2321	3763	FLT1	11	10.79	high	Yes	Yes	Compara, eggNOG, Hieranoid, Inparanoid, OrthoDB, OrthoInspector, orthoMCL, Panther, Phylome, RoundUp, TreeFam
FBgn0032409	34633	FBgn0032409	Ced-12	Human	63916	17233	ELMO2	11	10.76	moderate	No	Yes	Compara, eggNOG, Hieranoid, Inparanoid, OMA, OrthoFinder, OrthoInspector, orthoMCL, Panther, Phylome, TreeFam
FBgn0032702	35126	FBgn0032702	CG10376	Human	22843	19322	PPM1E	11	10.79	moderate	No	Yes	Compara, eggNOG, Hieranoid, Inparanoid, OrthoDB, OrthoInspector, orthoMCL, Panther, Phylome, RoundUp, TreeFam
FBgn0033017	35488	FBgn0033017	CG10465	Human	253980	22234	KCTD13	11	10.89	moderate	No	Yes	Compara, eggNOG, Hieranoid, Inparanoid, OrthoDB, OrthoFinder, OrthoInspector, Panther, Phylome, RoundUp, TreeFam
FBgn0033017	35488	FBgn0033017	CG10465	Human	7126	11894	TNFAIP1	11	10.87	moderate	No	Yes	Compara, eggNOG, Hieranoid, Inparanoid, OMA, OrthoDB, OrthoFinder, OrthoInspector, Panther, Phylome, TreeFam
FBgn0033194	35693	FBgn0033194	Vps13	Human	54832	23594	VPS13C	11	10.75	moderate	No	Yes	Compara, eggNOG, OMA, OrthoDB, OrthoFinder, OrthoInspector, orthoMCL, Panther, Phylome, RoundUp, TreeFam
FBgn0034936	37807	FBgn0034936	CG2970	Human	30968	14559	STOML2	11	10.88	high	Yes	Yes	Compara, eggNOG, Homologene, Inparanoid, OMA, OrthoFinder, OrthoInspector, orthoMCL, Panther, RoundUp, TreeFam
FBgn0034970	37851	FBgn0034970	yki	Human	10413	16262	YAP1	11	10.74	high	Yes	Yes	Compara, eggNOG, Hieranoid, OrthoDB, OrthoFinder, OrthoInspector, orthoMCL, Panther, Phylome, RoundUp, TreeFam
FBgn0034975	37859	FBgn0034975	enok	Human	7994	13013	KAT6A	11	10.78	high	Yes	Yes	Compara, eggNOG, Hieranoid, Inparanoid, OrthoFinder, OrthoInspector, orthoMCL, Panther, Phylome, RoundUp, TreeFam
FBgn0035268	38224	FBgn0035268	CG8001	Human	50717	24891	DCAF8	11	10.79	high	Yes	Yes	Compara, eggNOG, Hieranoid, Inparanoid, OrthoDB, OrthoInspector, orthoMCL, Panther, Phylome, RoundUp, TreeFam
FBgn0035688	38714	FBgn0035688	CG10289	Human	9701	19253	PPP6R2	11	10.79	high	Yes	Yes	Compara, eggNOG, Inparanoid, OrthoDB, OrthoFinder, OrthoInspector, orthoMCL, Panther, Phylome, RoundUp, TreeFam
FBgn0035688	38714	FBgn0035688	CG10289	Human	55291	1173	PPP6R3	11	10.79	high	Yes	Yes	Compara, eggNOG, Inparanoid, OrthoDB, OrthoFinder, OrthoInspector, orthoMCL, Panther, Phylome, RoundUp, TreeFam
FBgn0035688	38714	FBgn0035688	CG10289	Human	22870	29195	PPP6R1	11	10.79	high	Yes	Yes	Compara, eggNOG, Inparanoid, OrthoDB, OrthoFinder, OrthoInspector, orthoMCL, Panther, Phylome, RoundUp, TreeFam
FBgn0036763	39989	FBgn0036763	TrpRS-m	Human	10352	12730	WARS2	11	10.68	high	Yes	Yes	Compara, eggNOG, Homologene, Isobase, OrthoFinder, OrthoInspector, orthoMCL, Panther, Phylome, RoundUp, TreeFam
FBgn0037093	40385	FBgn0037093	Cdk12	Human	8621	1733	CDK13	11	10.79	high	Yes	Yes	Compara, eggNOG, Hieranoid, Inparanoid, OrthoDB, OrthoInspector, orthoMCL, Panther, Phylome, RoundUp, TreeFam
FBgn0037093	40385	FBgn0037093	Cdk12	Human	51755	24224	CDK12	11	10.79	high	Yes	Yes	Compara, eggNOG, Hieranoid, Inparanoid, OrthoDB, OrthoInspector, orthoMCL, Panther, Phylome, RoundUp, TreeFam
FBgn0038968	42637	FBgn0038968	CG12499	Human	9875	17344	URB1	11	10.9	high	Yes	Yes	Compara, eggNOG, Hieranoid, Inparanoid, OMA, OrthoDB, OrthoInspector, Panther, Phylome, RoundUp, TreeFam
FBgn0039488	43267	FBgn0039488	CG6066	Human	79576	29873	NKAP	11	10.8	high	Yes	Yes	Compara, eggNOG, Inparanoid, OMA, OrthoDB, OrthoInspector, orthoMCL, Panther, Phylome, RoundUp, TreeFam
FBgn0039601	43400	FBgn0039601	CG1523	Human	79269	23686	DCAF10	11	10.74	high	Yes	Yes	Compara, eggNOG, Hieranoid, OrthoDB, OrthoFinder, OrthoInspector, orthoMCL, Panther, Phylome, RoundUp, TreeFam
FBgn0039710	43529	FBgn0039710	dgt1	Human	54934	26024	KANSL2	11	10.78	high	Yes	Yes	Compara, eggNOG, Homologene, Inparanoid, OrthoFinder, OrthoInspector, orthoMCL, Panther, Phylome, RoundUp, TreeFam
FBgn0039861	43728	FBgn0039861	pasha	Human	54487	2847	DGCR8	11	10.86	high	Yes	Yes	eggNOG, Hieranoid, Homologene, Inparanoid, OrthoDB, OrthoInspector, orthoMCL, Panther, Phylome, RoundUp, TreeFam
FBgn0040011	3355127	FBgn0040011	Slmap	Human	7871	16643	SLMAP	11	10.89	high	Yes	Yes	Compara, eggNOG, Hieranoid, Inparanoid, OrthoDB, OrthoFinder, OrthoInspector, Panther, Phylome, RoundUp, TreeFam
FBgn0040022	3354971	FBgn0040022	Set1	Human	23067	29187	SETD1B	11	10.88	moderate	No	Yes	Compara, eggNOG, Hieranoid, Inparanoid, OrthoDB, OrthoFinder, OrthoInspector, orthoMCL, Panther, RoundUp, TreeFam
FBgn0040237	53565	FBgn0040237	bor	Human	83858	24007	ATAD3B	11	10.81	moderate	No	Yes	Compara, Hieranoid, Inparanoid, Isobase, OMA, OrthoFinder, OrthoInspector, orthoMCL, Panther, Phylome, TreeFam
FBgn0040475	39136	FBgn0040475	SH3PX1	Human	257364	28468	SNX33	11	10.74	moderate	No	Yes	Compara, eggNOG, Hieranoid, OrthoDB, OrthoFinder, OrthoInspector, orthoMCL, Panther, Phylome, RoundUp, TreeFam
FBgn0041180	35248	FBgn0041180	Tep4	Human	135228	21685	CD109	11	10.81	high	Yes	Yes	Compara, eggNOG, Hieranoid, Inparanoid, OMA, OrthoDB, OrthoFinder, OrthoInspector, orthoMCL, Panther, Phylome
FBgn0052082	39258	FBgn0052082	IRSp53	Human	10458	947	BAIAP2	11	10.89	high	Yes	Yes	Compara, Hieranoid, Inparanoid, OrthoDB, OrthoFinder, OrthoInspector, orthoMCL, Panther, Phylome, RoundUp, TreeFam
FBgn0086707	35099	FBgn0086707	ncm	Human	57703	29322	CWC22	11	10.79	high	Yes	Yes	Compara, eggNOG, Hieranoid, Inparanoid, OrthoDB, OrthoInspector, orthoMCL, Panther, Phylome, RoundUp, TreeFam
FBgn0087013	40581	FBgn0087013	Karybeta3	Human	26953	9851	RANBP6	11	10.76	moderate	No	Yes	Compara, eggNOG, Hieranoid, Inparanoid, OMA, OrthoFinder, OrthoInspector, orthoMCL, Panther, Phylome, TreeFam
FBgn0250786	33505	FBgn0250786	Chd1	Human	1105	1915	CHD1	11	10.87	moderate	No	Yes	eggNOG, Hieranoid, Inparanoid, OMA, OrthoDB, OrthoInspector, orthoMCL, Panther, Phylome, RoundUp, TreeFam
FBgn0259178	326119	FBgn0259178	5PtaseI	Human	3632	6076	INPP5A	11	10.74	high	Yes	Yes	Compara, eggNOG, Homologene, OrthoDB, OrthoFinder, OrthoInspector, orthoMCL, Panther, Phylome, RoundUp, TreeFam
FBgn0260771	44900	FBgn0260771	Larp7	Human	51574	24912	LARP7	11	11	high	Yes	Yes	Compara, Hieranoid, Inparanoid, OMA, OrthoDB, OrthoFinder, OrthoInspector, Panther, Phylome, RoundUp, TreeFam
FBgn0261456	37247	FBgn0261456	hpo	Human	6789	11408	STK4	11	10.89	moderate	No	Yes	Compara, Hieranoid, Inparanoid, OrthoDB, OrthoFinder, OrthoInspector, orthoMCL, Panther, Phylome, RoundUp, TreeFam
FBgn0262114	36102	FBgn0262114	RanBPM	Human	57610	29285	RANBP10	11	10.79	moderate	No	Yes	Compara, eggNOG, Hieranoid, Inparanoid, OrthoDB, OrthoInspector, orthoMCL, Panther, Phylome, RoundUp, TreeFam
FBgn0263144	35552	FBgn0263144	bin3	Human	56257	20247	MEPCE	11	10.71	high	Yes	Yes	Compara, eggNOG, Hieranoid, Inparanoid, Isobase, OrthoDB, OrthoInspector, orthoMCL, Panther, Phylome, TreeFam
FBgn0263603	39764	FBgn0263603	Zn72D	Human	23217	29189	ZFR2	11	10.76	moderate	No	Yes	Compara, eggNOG, Hieranoid, Inparanoid, OrthoDB, OrthoFinder, OrthoInspector, orthoMCL, Panther, Phylome, TreeFam
FBgn0265998	43415	FBgn0265998	Doa	Human	1196	2069	CLK2	11	10.69	high	Yes	Yes	Compara, eggNOG, Homologene, Isobase, OrthoDB, OrthoInspector, orthoMCL, Panther, Phylome, RoundUp, TreeFam
FBgn0266570	31374	FBgn0266570	CG2982	Human	79697	20968	RIOX1	11	11.04	high	Yes	Yes	Compara, Hieranoid, Homologene, Inparanoid, OMA, OrthoDB, OrthoFinder, OrthoInspector, Panther, Phylome, RoundUp
FBgn0267351	37188	FBgn0267351	Topors	Human	10210	21653	TOPORS	11	10.69	high	Yes	Yes	Compara, eggNOG, Hieranoid, Inparanoid, OrthoDB, OrthoFinder, OrthoInspector, orthoMCL, Phylome, RoundUp, TreeFam
FBgn0000140	42946	FBgn0000140	asp	Human	259266	19048	ASPM	12	11.64	high	Yes	Yes	Compara, eggNOG, Hieranoid, Inparanoid, Isobase, OrthoDB, OrthoFinder, OrthoInspector, orthoMCL, Phylome, RoundUp, TreeFam
FBgn0000617	32762	FBgn0000617	e(y)1	Human	6880	11542	TAF9	12	11.79	high	Yes	Yes	Compara, eggNOG, Hieranoid, Inparanoid, OrthoDB, OrthoFinder, OrthoInspector, orthoMCL, Panther, Phylome, RoundUp, TreeFam
FBgn0000617	32762	FBgn0000617	e(y)1	Human	51616	17306	TAF9B	12	11.79	high	Yes	Yes	Compara, eggNOG, Hieranoid, Inparanoid, OrthoDB, OrthoFinder, OrthoInspector, orthoMCL, Panther, Phylome, RoundUp, TreeFam
FBgn0000667	31166	FBgn0000667	Actn	Human	81	166	ACTN4	12	11.77	moderate	No	Yes	Compara, eggNOG, Hieranoid, Inparanoid, OMA, OrthoDB, OrthoFinder, OrthoInspector, orthoMCL, Panther, Phylome, TreeFam
FBgn0001139	43162	FBgn0001139	gro	Human	7091	11840	TLE4	12	11.79	high	Yes	Yes	Compara, eggNOG, Hieranoid, Inparanoid, OrthoDB, OrthoFinder, OrthoInspector, orthoMCL, Panther, Phylome, RoundUp, TreeFam
FBgn0001139	43162	FBgn0001139	gro	Human	7090	11839	TLE3	12	11.79	high	Yes	Yes	Compara, eggNOG, Hieranoid, Inparanoid, OrthoDB, OrthoFinder, OrthoInspector, orthoMCL, Panther, Phylome, RoundUp, TreeFam
FBgn0002121	33156	FBgn0002121	l(2)gl	Human	3993	6629	LLGL2	12	11.77	moderate	No	Yes	Compara, eggNOG, Hieranoid, Inparanoid, OMA, OrthoDB, OrthoFinder, OrthoInspector, orthoMCL, Panther, Phylome, TreeFam
FBgn0002413	43673	FBgn0002413	dco	Human	1453	2452	CSNK1D	12	11.7	high	Yes	Yes	Compara, eggNOG, Hieranoid, Inparanoid, OMA, OrthoDB, OrthoFinder, OrthoInspector, orthoMCL, Phylome, RoundUp, TreeFam
FBgn0002466	39429	FBgn0002466	sti	Human	11113	1985	CIT	12	11.91	high	Yes	Yes	eggNOG, Homologene, Inparanoid, Isobase, OMA, OrthoDB, OrthoFinder, OrthoInspector, orthoMCL, Panther, RoundUp, TreeFam
FBgn0002526	38723	FBgn0002526	LanA	Human	3911	6485	LAMA5	12	11.77	high	Yes	Yes	eggNOG, Hieranoid, Homologene, Inparanoid, OMA, OrthoDB, OrthoFinder, OrthoInspector, orthoMCL, Phylome, RoundUp, TreeFam
FBgn0002973	34263	FBgn0002973	numb	Human	9253	8061	NUMBL	12	11.79	high	Yes	Yes	Compara, eggNOG, Hieranoid, Inparanoid, OrthoDB, OrthoFinder, OrthoInspector, orthoMCL, Panther, Phylome, RoundUp, TreeFam
FBgn0003048	31204	FBgn0003048	pcx	Human	22990	19740	PCNX1	12	11.79	high	Yes	Yes	Compara, eggNOG, Hieranoid, Inparanoid, OrthoDB, OrthoFinder, OrthoInspector, orthoMCL, Panther, Phylome, RoundUp, TreeFam
FBgn0003048	31204	FBgn0003048	pcx	Human	399909	18760	PCNX3	12	11.79	high	Yes	Yes	Compara, eggNOG, Hieranoid, Inparanoid, OrthoDB, OrthoFinder, OrthoInspector, orthoMCL, Panther, Phylome, RoundUp, TreeFam
FBgn0003134	42922	FBgn0003134	Pp1alpha-96A	Human	5499	9281	PPP1CA	12	11.72	moderate	Yes	No	Compara, eggNOG, Inparanoid, Isobase, OMA, OrthoDB, OrthoFinder, OrthoInspector, orthoMCL, Panther, Phylome, TreeFam
FBgn0003204	43873	FBgn0003204	ras	Human	3615	6053	IMPDH2	12	11.75	moderate	No	Yes	Compara, eggNOG, Hieranoid, OMA, OrthoDB, OrthoFinder, OrthoInspector, orthoMCL, Panther, Phylome, RoundUp, TreeFam
FBgn0003317	35731	FBgn0003317	sax	Human	90	171	ACVR1	12	11.74	high	Yes	Yes	Compara, eggNOG, Homologene, Inparanoid, Isobase, OrthoDB, OrthoInspector, orthoMCL, Panther, Phylome, RoundUp, TreeFam
FBgn0003514	31554	FBgn0003514	sqh	Human	10398	15754	MYL9	12	11.72	moderate	No	Yes	eggNOG, Hieranoid, Inparanoid, Isobase, OMA, OrthoDB, OrthoFinder, OrthoInspector, orthoMCL, Phylome, RoundUp, TreeFam
FBgn0003557	33379	FBgn0003557	Su(dx)	Human	11059	17004	WWP1	12	11.76	moderate	No	Yes	Compara, eggNOG, Hieranoid, Homologene, Inparanoid, OrthoDB, OrthoFinder, OrthoInspector, orthoMCL, Panther, Phylome, TreeFam
FBgn0003977	47869	FBgn0003977	vir	Human	25962	24500	VIRMA	12	11.77	high	Yes	Yes	Compara, eggNOG, Hieranoid, Inparanoid, OMA, OrthoDB, OrthoFinder, OrthoInspector, orthoMCL, Panther, Phylome, TreeFam
FBgn0004103	49260	FBgn0004103	Pp1-87B	Human	5501	9283	PPP1CC	12	11.87	moderate	No	Yes	eggNOG, Homologene, Inparanoid, OMA, OrthoDB, OrthoFinder, OrthoInspector, orthoMCL, Panther, Phylome, RoundUp, TreeFam
FBgn0004237	48535	FBgn0004237	Hrb87F	Human	3181	5033	HNRNPA2B1	12	11.8	moderate	Yes	No	Compara, eggNOG, Hieranoid, Inparanoid, OMA, OrthoDB, OrthoFinder, orthoMCL, Panther, Phylome, RoundUp, TreeFam
FBgn0005632	43749	FBgn0005632	faf	Human	8287	12633	USP9Y	12	11.77	moderate	No	Yes	Compara, eggNOG, Hieranoid, Inparanoid, OMA, OrthoDB, OrthoFinder, OrthoInspector, orthoMCL, Panther, Phylome, TreeFam
FBgn0010225	46008	FBgn0010225	Gel	Human	85477	21695	SCIN	12	11.84	moderate	No	Yes	Compara, eggNOG, Hieranoid, Inparanoid, OMA, OrthoDB, OrthoFinder, OrthoInspector, orthoMCL, Panther, Phylome, RoundUp
FBgn0010225	46008	FBgn0010225	Gel	Human	10677	14188	AVIL	12	11.77	moderate	No	Yes	Compara, eggNOG, Hieranoid, Inparanoid, OMA, OrthoDB, OrthoFinder, OrthoInspector, orthoMCL, Panther, Phylome, TreeFam
FBgn0011225	42889	FBgn0011225	jar	Human	4646	7605	MYO6	12	11.83	high	Yes	Yes	Compara, eggNOG, Hieranoid, Homologene, Inparanoid, Isobase, OrthoFinder, OrthoInspector, Panther, Phylome, RoundUp, TreeFam
FBgn0014340	31518	FBgn0014340	mof	Human	84148	17933	KAT8	12	11.79	high	Yes	Yes	Compara, eggNOG, Hieranoid, Homologene, Inparanoid, OrthoDB, OrthoInspector, orthoMCL, Panther, Phylome, RoundUp, TreeFam
FBgn0015024	32221	FBgn0015024	CkIalpha	Human	122011	20289	CSNK1A1L	12	11.79	moderate	No	Yes	eggNOG, Hieranoid, Inparanoid, Isobase, OMA, OrthoDB, OrthoFinder, OrthoInspector, orthoMCL, Panther, Phylome, TreeFam
FBgn0015278	39329	FBgn0015278	Pi3K68D	Human	5286	8971	PIK3C2A	12	11.71	high	Yes	Yes	Compara, eggNOG, Hieranoid, Homologene, Inparanoid, Isobase, OMA, OrthoInspector, orthoMCL, Panther, Phylome, TreeFam
FBgn0016917	42428	FBgn0016917	Stat92E	Human	6777	11367	STAT5B	12	11.74	high	Yes	Yes	Compara, eggNOG, Hieranoid, Inparanoid, Isobase, OrthoDB, OrthoInspector, orthoMCL, Panther, Phylome, RoundUp, TreeFam
FBgn0020497	34167	FBgn0020497	emb	Human	7514	12825	XPO1	12	11.89	high	Yes	Yes	Compara, eggNOG, Hieranoid, Homologene, Inparanoid, OMA, OrthoFinder, OrthoInspector, Panther, Phylome, RoundUp, TreeFam
FBgn0020503	35042	FBgn0020503	CLIP-190	Human	6249	10461	CLIP1	12	11.9	high	Yes	Yes	Compara, Hieranoid, Inparanoid, OMA, OrthoDB, OrthoFinder, OrthoInspector, orthoMCL, Panther, Phylome, RoundUp, TreeFam
FBgn0020503	35042	FBgn0020503	CLIP-190	Human	7461	2586	CLIP2	12	11.84	high	Yes	Yes	Compara, Hieranoid, Inparanoid, Isobase, OrthoDB, OrthoFinder, OrthoInspector, orthoMCL, Panther, Phylome, RoundUp, TreeFam
FBgn0022069	44391	FBgn0022069	Nnp-1	Human	23076	23818	RRP1B	12	11.79	high	Yes	Yes	Compara, eggNOG, Hieranoid, Inparanoid, OrthoDB, OrthoFinder, OrthoInspector, orthoMCL, Panther, Phylome, RoundUp, TreeFam
FBgn0022069	44391	FBgn0022069	Nnp-1	Human	8568	18785	RRP1	12	11.79	high	Yes	Yes	Compara, eggNOG, Hieranoid, Inparanoid, OrthoDB, OrthoFinder, OrthoInspector, orthoMCL, Panther, Phylome, RoundUp, TreeFam
FBgn0022986	37561	FBgn0022986	qkr58E-1	Human	10656	18117	KHDRBS3	12	11.76	high	Yes	Yes	Compara, eggNOG, Hieranoid, Homologene, Inparanoid, OrthoDB, OrthoFinder, OrthoInspector, orthoMCL, Panther, Phylome, TreeFam
FBgn0024277	43974	FBgn0024277	trio	Human	7204	12303	TRIO	12	11.81	high	Yes	Yes	Compara, eggNOG, Homologene, Inparanoid, Isobase, OMA, OrthoDB, OrthoFinder, OrthoInspector, orthoMCL, Panther, TreeFam
FBgn0024921	38721	FBgn0024921	Trn	Human	30000	19998	TNPO2	12	11.79	moderate	No	Yes	Compara, eggNOG, Hieranoid, Inparanoid, OMA, OrthoFinder, OrthoInspector, orthoMCL, Panther, Phylome, RoundUp, TreeFam
FBgn0024992	31253	FBgn0024992	CG2658	Human	6687	11237	SPG7	12	11.83	high	Yes	Yes	Compara, eggNOG, Homologene, Inparanoid, Isobase, OMA, OrthoFinder, OrthoInspector, orthoMCL, Panther, RoundUp, TreeFam
FBgn0025455	39961	FBgn0025455	CycT	Human	904	1599	CCNT1	12	11.74	high	Yes	Yes	Compara, eggNOG, Inparanoid, Isobase, OrthoDB, OrthoFinder, OrthoInspector, orthoMCL, Panther, Phylome, RoundUp, TreeFam
FBgn0027568	34403	FBgn0027568	Cand1	Human	23066	30689	CAND2	12	11.79	moderate	No	Yes	Compara, eggNOG, Hieranoid, Inparanoid, OrthoDB, OrthoFinder, OrthoInspector, orthoMCL, Panther, Phylome, RoundUp, TreeFam
FBgn0027587	38032	FBgn0027587	CG7028	Human	8899	17346	PRPF4B	12	11.79	high	Yes	Yes	Compara, eggNOG, Hieranoid, Inparanoid, Isobase, OMA, OrthoDB, OrthoInspector, orthoMCL, Panther, Phylome, RoundUp
FBgn0028471	42897	FBgn0028471	Nab2	Human	79882	20509	ZC3H14	12	11.8	high	Yes	Yes	Compara, eggNOG, Inparanoid, OMA, OrthoDB, OrthoFinder, OrthoInspector, orthoMCL, Panther, Phylome, RoundUp, TreeFam
FBgn0028684	42805	FBgn0028684	Rpt5	Human	5702	9549	PSMC3	12	11.81	high	Yes	Yes	Compara, eggNOG, Homologene, Inparanoid, Isobase, OMA, OrthoDB, OrthoFinder, OrthoInspector, orthoMCL, Panther, TreeFam
FBgn0028685	31567	FBgn0028685	Rpt4	Human	5706	9553	PSMC6	12	11.83	high	Yes	Yes	Compara, eggNOG, Homologene, Inparanoid, Isobase, OMA, OrthoFinder, OrthoInspector, orthoMCL, Panther, RoundUp, TreeFam
FBgn0029134	45269	FBgn0029134	Prosbeta5	Human	5696	9545	PSMB8	12	11.79	moderate	No	Yes	Compara, eggNOG, Hieranoid, Inparanoid, OrthoDB, OrthoFinder, OrthoInspector, orthoMCL, Panther, Phylome, RoundUp, TreeFam
FBgn0029672	31326	FBgn0029672	CG2875	Human	79050	28461	NOC4L	12	11.79	high	Yes	Yes	Compara, eggNOG, Hieranoid, Homologene, Inparanoid, OrthoDB, OrthoInspector, orthoMCL, Panther, Phylome, RoundUp, TreeFam
FBgn0031057	32977	FBgn0031057	Ubqn	Human	29978	12509	UBQLN2	12	11.77	moderate	No	Yes	Compara, eggNOG, Hieranoid, Inparanoid, OMA, OrthoDB, OrthoFinder, OrthoInspector, orthoMCL, Panther, Phylome, TreeFam
FBgn0031161	33094	FBgn0031161	CG15445	Human	51667	17623	NUB1	12	11.94	high	Yes	Yes	Compara, Hieranoid, Homologene, Inparanoid, OMA, OrthoDB, OrthoFinder, OrthoInspector, orthoMCL, Panther, Phylome, RoundUp
FBgn0031452	33460	FBgn0031452	Cwc25	Human	54883	25989	CWC25	12	11.8	high	Yes	Yes	Compara, eggNOG, Inparanoid, OMA, OrthoDB, OrthoFinder, OrthoInspector, orthoMCL, Panther, Phylome, RoundUp, TreeFam
FBgn0031493	33514	FBgn0031493	CG3605	Human	10992	10769	SF3B2	12	11.79	high	Yes	Yes	Compara, eggNOG, Hieranoid, Homologene, Inparanoid, OrthoDB, OrthoInspector, orthoMCL, Panther, Phylome, RoundUp, TreeFam
FBgn0032363	34573	FBgn0032363	Dlg5	Human	9231	2904	DLG5	12	11.8	high	Yes	Yes	Compara, eggNOG, Hieranoid, Inparanoid, OMA, OrthoDB, OrthoInspector, orthoMCL, Panther, Phylome, RoundUp, TreeFam
FBgn0032701	35125	FBgn0032701	CG10341	Human	92345	25126	NAF1	12	11.8	high	Yes	Yes	Compara, eggNOG, Hieranoid, Inparanoid, OMA, OrthoDB, OrthoInspector, orthoMCL, Panther, Phylome, RoundUp, TreeFam
FBgn0033155	35648	FBgn0033155	Br140	Human	27154	14256	BRPF3	12	11.8	moderate	No	Yes	Compara, eggNOG, Inparanoid, OMA, OrthoDB, OrthoFinder, OrthoInspector, orthoMCL, Panther, Phylome, RoundUp, TreeFam
FBgn0033246	35761	FBgn0033246	ACC	Human	32	85	ACACB	12	11.8	moderate	No	Yes	Compara, eggNOG, Hieranoid, Inparanoid, OMA, OrthoDB, OrthoInspector, orthoMCL, Panther, Phylome, RoundUp, TreeFam
FBgn0033897	36560	FBgn0033897	Rcd1	Human	55683	25473	KANSL3	12	11.79	high	Yes	Yes	Compara, eggNOG, Hieranoid, Inparanoid, OrthoDB, OrthoFinder, OrthoInspector, orthoMCL, Panther, Phylome, RoundUp, TreeFam
FBgn0034792	37636	FBgn0034792	CG3499	Human	10730	12843	YME1L1	12	11.64	high	Yes	Yes	Compara, eggNOG, Hieranoid, Homologene, Inparanoid, Isobase, OrthoDB, OrthoInspector, orthoMCL, Phylome, RoundUp, TreeFam
FBgn0034971	37852	FBgn0034971	CG3209	Human	137964	20880	GPAT4	12	11.89	high	Yes	Yes	Compara, eggNOG, Hieranoid, Homologene, Inparanoid, OrthoDB, OrthoFinder, OrthoInspector, Panther, Phylome, RoundUp, TreeFam
FBgn0035065	37966	FBgn0035065	CG3589	Human	219743	28531	TYSND1	12	11.74	high	Yes	Yes	Compara, eggNOG, Hieranoid, Inparanoid, Isobase, OrthoDB, OrthoInspector, orthoMCL, Panther, Phylome, RoundUp, TreeFam
FBgn0035432	38407	FBgn0035432	ZnT63C	Human	7779	11012	SLC30A1	12	11.83	high	Yes	Yes	Compara, eggNOG, Hieranoid, Homologene, Inparanoid, OrthoDB, OrthoFinder, OrthoInspector, orthoMCL, Panther, Phylome, RoundUp
FBgn0035497	38487	FBgn0035497	CG14995	Human	755	1260	C21orf2	12	11.79	high	Yes	Yes	Compara, eggNOG, Hieranoid, Inparanoid, OrthoDB, OrthoFinder, OrthoInspector, orthoMCL, Panther, Phylome, RoundUp, TreeFam
FBgn0036372	39520	FBgn0036372	Abp1	Human	28988	2696	DBNL	12	11.91	high	Yes	Yes	eggNOG, Hieranoid, Homologene, Inparanoid, OMA, OrthoDB, OrthoFinder, OrthoInspector, orthoMCL, Panther, Phylome, RoundUp
FBgn0036450	39612	FBgn0036450	Tdrd3	Human	81550	20612	TDRD3	12	11.79	high	Yes	Yes	Compara, eggNOG, Hieranoid, Inparanoid, OrthoDB, OrthoFinder, OrthoInspector, orthoMCL, Panther, Phylome, RoundUp, TreeFam
FBgn0036827	40062	FBgn0036827	CG6843	Human	9541	24217	CIR1	12	11.79	high	Yes	Yes	Compara, eggNOG, Hieranoid, Inparanoid, OMA, OrthoFinder, OrthoInspector, orthoMCL, Panther, Phylome, RoundUp, TreeFam
FBgn0037707	41147	FBgn0037707	RnpS1	Human	10921	10080	RNPS1	12	11.89	high	Yes	Yes	Compara, eggNOG, Hieranoid, Inparanoid, OMA, OrthoDB, OrthoFinder, OrthoInspector, orthoMCL, Panther, RoundUp, TreeFam
FBgn0038206	41719	FBgn0038206	twf	Human	11344	9621	TWF2	12	11.9	moderate	No	Yes	Compara, eggNOG, Hieranoid, Inparanoid, OMA, OrthoDB, OrthoFinder, OrthoInspector, Panther, Phylome, RoundUp, TreeFam
FBgn0038826	42460	FBgn0038826	Syp	Human	10492	16918	SYNCRIP	12	11.79	high	Yes	Yes	Compara, eggNOG, Hieranoid, Inparanoid, OrthoDB, OrthoFinder, OrthoInspector, orthoMCL, Panther, Phylome, RoundUp, TreeFam
FBgn0038826	42460	FBgn0038826	Syp	Human	10236	5047	HNRNPR	12	11.79	high	Yes	Yes	Compara, eggNOG, Hieranoid, Inparanoid, OrthoDB, OrthoFinder, OrthoInspector, orthoMCL, Panther, Phylome, RoundUp, TreeFam
FBgn0038964	42633	FBgn0038964	Nop56	Human	10528	15911	NOP56	12	11.86	high	Yes	Yes	eggNOG, Hieranoid, Homologene, Inparanoid, OMA, OrthoFinder, OrthoInspector, orthoMCL, Panther, Phylome, RoundUp, TreeFam
FBgn0040022	3354971	FBgn0040022	Set1	Human	9739	29010	SETD1A	12	11.69	high	Yes	Yes	Compara, eggNOG, Hieranoid, Isobase, OrthoDB, OrthoFinder, OrthoInspector, orthoMCL, Panther, Phylome, RoundUp, TreeFam
FBgn0040068	32920	FBgn0040068	Vav	Human	10451	12659	VAV3	12	11.79	moderate	No	Yes	Compara, eggNOG, Hieranoid, Inparanoid, OMA, OrthoFinder, OrthoInspector, orthoMCL, Panther, Phylome, RoundUp, TreeFam
FBgn0040068	32920	FBgn0040068	Vav	Human	7410	12658	VAV2	12	11.79	moderate	No	Yes	Compara, eggNOG, Hieranoid, Inparanoid, OMA, OrthoFinder, OrthoInspector, orthoMCL, Panther, Phylome, RoundUp, TreeFam
FBgn0040235	53435	FBgn0040235	c12.1	Human	51503	26939	CWC15	12	11.94	high	Yes	Yes	Compara, Hieranoid, Homologene, Inparanoid, OMA, OrthoDB, OrthoFinder, OrthoInspector, orthoMCL, Panther, Phylome, RoundUp
FBgn0040475	39136	FBgn0040475	SH3PX1	Human	112574	19245	SNX18	12	11.75	high	Yes	Yes	Compara, eggNOG, Hieranoid, Homologene, OMA, OrthoDB, OrthoFinder, orthoMCL, Panther, Phylome, RoundUp, TreeFam
FBgn0051357	326135	FBgn0051357	CG31357	Human	10296	13731	MAEA	12	11.78	high	Yes	Yes	Compara, eggNOG, Hieranoid, Homologene, Inparanoid, OrthoFinder, OrthoInspector, orthoMCL, Panther, Phylome, RoundUp, TreeFam
FBgn0051729	34736	FBgn0051729	CG31729	Human	10079	13540	ATP9A	12	11.8	moderate	No	Yes	Compara, eggNOG, Hieranoid, Inparanoid, OMA, OrthoDB, OrthoInspector, orthoMCL, Panther, Phylome, RoundUp, TreeFam
FBgn0052675	326232	FBgn0052675	Tango5	Human	81671	29559	VMP1	12	11.87	high	Yes	Yes	eggNOG, Hieranoid, Homologene, Inparanoid, OMA, OrthoDB, OrthoInspector, orthoMCL, Panther, Phylome, RoundUp, TreeFam
FBgn0082582	43633	FBgn0082582	tmod	Human	7111	11871	TMOD1	12	11.83	high	Yes	Yes	Compara, eggNOG, Hieranoid, Homologene, Inparanoid, OMA, OrthoFinder, OrthoInspector, orthoMCL, Panther, Phylome, RoundUp
FBgn0086347	34445	FBgn0086347	Myo31DF	Human	64005	13880	MYO1G	12	11.77	moderate	No	Yes	Compara, eggNOG, Hieranoid, Inparanoid, OMA, OrthoDB, OrthoFinder, OrthoInspector, orthoMCL, Panther, Phylome, TreeFam
FBgn0250786	33505	FBgn0250786	Chd1	Human	1106	1917	CHD2	12	11.87	high	Yes	Yes	eggNOG, Hieranoid, Homologene, Inparanoid, OMA, OrthoDB, OrthoInspector, orthoMCL, Panther, Phylome, RoundUp, TreeFam
FBgn0259174	39958	FBgn0259174	Nedd4	Human	4734	7727	NEDD4	12	11.8	moderate	No	Yes	Compara, eggNOG, Hieranoid, Inparanoid, OMA, OrthoDB, OrthoInspector, orthoMCL, Panther, Phylome, RoundUp, TreeFam
FBgn0259228	31618	FBgn0259228	C3G	Human	2889	4568	RAPGEF1	12	11.74	high	Yes	Yes	Compara, eggNOG, Hieranoid, Inparanoid, Isobase, OrthoDB, OrthoInspector, orthoMCL, Panther, Phylome, RoundUp, TreeFam
FBgn0260012	36286	FBgn0260012	pds5	Human	23244	29088	PDS5A	12	11.77	moderate	No	Yes	Compara, eggNOG, Hieranoid, Inparanoid, OMA, OrthoDB, OrthoFinder, OrthoInspector, orthoMCL, Panther, Phylome, TreeFam
FBgn0261397	35680	FBgn0261397	didum	Human	55930	7604	MYO5C	12	11.72	moderate	No	Yes	Compara, eggNOG, Inparanoid, Isobase, OMA, OrthoDB, OrthoFinder, OrthoInspector, orthoMCL, Panther, Phylome, TreeFam
FBgn0261456	37247	FBgn0261456	hpo	Human	6788	11406	STK3	12	11.89	high	Yes	Yes	Compara, Hieranoid, Homologene, Inparanoid, OrthoDB, OrthoFinder, OrthoInspector, orthoMCL, Panther, Phylome, RoundUp, TreeFam
FBgn0262114	36102	FBgn0262114	RanBPM	Human	10048	13727	RANBP9	12	11.79	high	Yes	Yes	Compara, eggNOG, Hieranoid, Homologene, Inparanoid, OrthoDB, OrthoInspector, orthoMCL, Panther, Phylome, RoundUp, TreeFam
FBgn0265778	33881	FBgn0265778	PDZ-GEF	Human	51735	20655	RAPGEF6	12	11.71	moderate	No	Yes	Compara, eggNOG, Hieranoid, Inparanoid, Isobase, OrthoDB, OrthoFinder, OrthoInspector, orthoMCL, Panther, Phylome, TreeFam
FBgn0284251	35374	FBgn0284251	l(2)05287	Human	84128	25725	WDR75	12	11.78	high	Yes	Yes	Compara, eggNOG, Hieranoid, Homologene, Inparanoid, OrthoFinder, OrthoInspector, orthoMCL, Panther, Phylome, RoundUp, TreeFam
FBgn0000499	32078	FBgn0000499	dsh	Human	1856	3086	DVL2	13	12.8	moderate	No	Yes	Compara, eggNOG, Hieranoid, Inparanoid, OMA, OrthoDB, OrthoFinder, OrthoInspector, orthoMCL, Panther, Phylome, RoundUp, TreeFam
FBgn0000667	31166	FBgn0000667	Actn	Human	87	163	ACTN1	13	12.8	moderate	No	Yes	Compara, eggNOG, Hieranoid, Inparanoid, OMA, OrthoDB, OrthoFinder, OrthoInspector, orthoMCL, Panther, Phylome, RoundUp, TreeFam
FBgn0001961	34793	FBgn0001961	Arpc1	Human	10095	704	ARPC1B	13	12.8	moderate	No	Yes	Compara, eggNOG, Hieranoid, Inparanoid, OMA, OrthoDB, OrthoFinder, OrthoInspector, orthoMCL, Panther, Phylome, RoundUp, TreeFam
FBgn0002284	39855	FBgn0002284	Prosbeta6	Human	5689	9537	PSMB1	13	12.79	high	Yes	Yes	Compara, eggNOG, Hieranoid, Homologene, Inparanoid, OMA, OrthoFinder, OrthoInspector, orthoMCL, Panther, Phylome, RoundUp, TreeFam
FBgn0002736	37402	FBgn0002736	mago	Human	4116	6815	MAGOH	13	12.8	moderate	No	Yes	Compara, eggNOG, Hieranoid, Inparanoid, OMA, OrthoDB, OrthoFinder, OrthoInspector, orthoMCL, Panther, Phylome, RoundUp, TreeFam
FBgn0003204	43873	FBgn0003204	ras	Human	3614	6052	IMPDH1	13	12.8	high	Yes	Yes	Compara, Hieranoid, Homologene, Isobase, OMA, OrthoDB, OrthoFinder, OrthoInspector, orthoMCL, Panther, Phylome, RoundUp, TreeFam
FBgn0003274	36855	FBgn0003274	RpLP2	Human	6181	10377	RPLP2	13	12.8	high	Yes	Yes	Compara, eggNOG, Hieranoid, Inparanoid, OMA, OrthoDB, OrthoFinder, OrthoInspector, orthoMCL, Panther, Phylome, RoundUp, TreeFam
FBgn0003514	31554	FBgn0003514	sqh	Human	10627	16701	MYL12A	13	12.8	high	Yes	Yes	Compara, eggNOG, Hieranoid, Inparanoid, OMA, OrthoDB, OrthoFinder, OrthoInspector, orthoMCL, Panther, Phylome, RoundUp, TreeFam
FBgn0003557	33379	FBgn0003557	Su(dx)	Human	83737	13890	ITCH	13	12.74	high	Yes	Yes	Compara, eggNOG, Hieranoid, Inparanoid, Isobase, OrthoDB, OrthoFinder, OrthoInspector, orthoMCL, Panther, Phylome, RoundUp, TreeFam
FBgn0003656	31716	FBgn0003656	sws	Human	10908	16268	PNPLA6	13	12.72	moderate	No	Yes	Compara, eggNOG, Hieranoid, Inparanoid, Isobase, OMA, OrthoDB, OrthoFinder, OrthoInspector, orthoMCL, Panther, Phylome, TreeFam
FBgn0004103	49260	FBgn0004103	Pp1-87B	Human	5499	9281	PPP1CA	13	12.75	high	Yes	Yes	Compara, eggNOG, Inparanoid, Isobase, OMA, OrthoDB, OrthoFinder, OrthoInspector, orthoMCL, Panther, Phylome, RoundUp, TreeFam
FBgn0004924	32458	FBgn0004924	Top1	Human	7150	11986	TOP1	13	12.8	high	Yes	Yes	Compara, eggNOG, Hieranoid, Homologene, Inparanoid, OMA, OrthoDB, OrthoInspector, orthoMCL, Panther, Phylome, RoundUp, TreeFam
FBgn0010225	46008	FBgn0010225	Gel	Human	2934	4620	GSN	13	12.79	high	Yes	Yes	Compara, eggNOG, Hieranoid, Inparanoid, Isobase, OMA, OrthoDB, OrthoFinder, OrthoInspector, orthoMCL, Panther, Phylome, RoundUp
FBgn0010380	32987	FBgn0010380	AP-1-2beta	Human	163	563	AP2B1	13	12.8	moderate	No	Yes	Compara, eggNOG, Hieranoid, Inparanoid, OMA, OrthoDB, OrthoFinder, OrthoInspector, orthoMCL, Panther, Phylome, RoundUp, TreeFam
FBgn0015331	40530	FBgn0015331	abs	Human	51428	18674	DDX41	13	12.73	high	Yes	Yes	Compara, eggNOG, Hieranoid, Homologene, Inparanoid, Isobase, OrthoFinder, OrthoInspector, orthoMCL, Panther, Phylome, RoundUp, TreeFam
FBgn0015527	33112	FBgn0015527	peng	Human	9933	29676	PUM3	13	12.8	high	Yes	Yes	Compara, eggNOG, Hieranoid, Inparanoid, OMA, OrthoDB, OrthoFinder, OrthoInspector, orthoMCL, Panther, Phylome, RoundUp, TreeFam
FBgn0019949	37586	FBgn0019949	Cdk9	Human	1025	1780	CDK9	13	12.87	high	Yes	Yes	eggNOG, Hieranoid, Homologene, Inparanoid, OMA, OrthoDB, OrthoFinder, OrthoInspector, orthoMCL, Panther, Phylome, RoundUp, TreeFam
FBgn0020909	32338	FBgn0020909	Rtc1	Human	10171	17687	RCL1	13	12.75	high	Yes	Yes	Compara, eggNOG, Hieranoid, Homologene, OMA, OrthoDB, OrthoFinder, OrthoInspector, orthoMCL, Panther, Phylome, RoundUp, TreeFam
FBgn0021760	43901	FBgn0021760	chb	Human	23122	17078	CLASP2	13	12.8	moderate	No	Yes	Compara, eggNOG, Hieranoid, Inparanoid, OMA, OrthoDB, OrthoFinder, OrthoInspector, orthoMCL, Panther, Phylome, RoundUp, TreeFam
FBgn0021995	44087	FBgn0021995	Rs1	Human	55661	15837	DDX27	13	12.79	high	Yes	Yes	Compara, eggNOG, Hieranoid, Homologene, Inparanoid, OrthoDB, OrthoFinder, OrthoInspector, orthoMCL, Panther, Phylome, RoundUp, TreeFam
FBgn0023388	35378	FBgn0023388	Dap160	Human	50618	6184	ITSN2	13	12.8	moderate	No	Yes	Compara, eggNOG, Hieranoid, Inparanoid, OMA, OrthoDB, OrthoFinder, OrthoInspector, orthoMCL, Panther, Phylome, RoundUp, TreeFam
FBgn0023542	31195	FBgn0023542	Nmd3	Human	51068	24250	NMD3	13	12.77	high	Yes	Yes	Compara, eggNOG, Hieranoid, Homologene, Inparanoid, OMA, OrthoDB, OrthoFinder, OrthoInspector, orthoMCL, Panther, Phylome, TreeFam
FBgn0024183	34885	FBgn0024183	vig	Human	26135	17860	SERBP1	13	12.8	high	Yes	Yes	Compara, eggNOG, Hieranoid, Inparanoid, OMA, OrthoDB, OrthoFinder, OrthoInspector, orthoMCL, Panther, Phylome, RoundUp, TreeFam
FBgn0024921	38721	FBgn0024921	Trn	Human	3842	6401	TNPO1	13	12.79	high	Yes	Yes	Compara, eggNOG, Hieranoid, Homologene, Inparanoid, OMA, OrthoFinder, OrthoInspector, orthoMCL, Panther, Phylome, RoundUp, TreeFam
FBgn0026196	33966	FBgn0026196	nop5	Human	51602	29926	NOP58	13	12.79	high	Yes	Yes	Compara, eggNOG, Hieranoid, Homologene, Inparanoid, OMA, OrthoFinder, OrthoInspector, orthoMCL, Panther, Phylome, RoundUp, TreeFam
FBgn0026252	44747	FBgn0026252	msk	Human	10527	9852	IPO7	13	12.79	high	Yes	Yes	Compara, eggNOG, Hieranoid, Homologene, Inparanoid, OMA, OrthoFinder, OrthoInspector, orthoMCL, Panther, Phylome, RoundUp, TreeFam
FBgn0026252	44747	FBgn0026252	msk	Human	10526	9853	IPO8	13	12.74	high	Yes	Yes	Compara, eggNOG, Hieranoid, Inparanoid, Isobase, OMA, OrthoFinder, OrthoInspector, orthoMCL, Panther, Phylome, RoundUp, TreeFam
FBgn0026722	35747	FBgn0026722	drosha	Human	29102	17904	DROSHA	13	12.8	high	Yes	Yes	Compara, eggNOG, Hieranoid, Homologene, Inparanoid, OMA, OrthoDB, OrthoInspector, orthoMCL, Panther, Phylome, RoundUp, TreeFam
FBgn0027509	33389	FBgn0027509	TBCD	Human	6904	11581	TBCD	13	12.79	high	Yes	Yes	Compara, eggNOG, Hieranoid, Homologene, Inparanoid, OMA, OrthoFinder, OrthoInspector, orthoMCL, Panther, Phylome, RoundUp, TreeFam
FBgn0027602	32725	FBgn0027602	CG8611	Human	64794	16715	DDX31	13	12.74	high	Yes	Yes	Compara, eggNOG, Hieranoid, Homologene, Inparanoid, Isobase, OrthoDB, OrthoInspector, orthoMCL, Panther, Phylome, RoundUp, TreeFam
FBgn0027617	42957	FBgn0027617	CG5808	Human	85313	15702	PPIL4	13	12.79	high	Yes	Yes	Compara, eggNOG, Hieranoid, Homologene, Inparanoid, OrthoDB, OrthoFinder, OrthoInspector, orthoMCL, Panther, Phylome, RoundUp, TreeFam
FBgn0028382	36984	FBgn0028382	cyp33	Human	10450	9258	PPIE	13	12.77	high	Yes	Yes	Compara, eggNOG, Hieranoid, Homologene, Inparanoid, OMA, OrthoDB, OrthoFinder, OrthoInspector, orthoMCL, Panther, Phylome, TreeFam
FBgn0028692	43449	FBgn0028692	Rpn2	Human	5707	9554	PSMD1	13	12.79	high	Yes	Yes	Compara, eggNOG, Hieranoid, Homologene, Inparanoid, OMA, OrthoFinder, OrthoInspector, orthoMCL, Panther, Phylome, RoundUp, TreeFam
FBgn0029006	36999	FBgn0029006	Smurf	Human	57154	16807	SMURF1	13	12.8	moderate	No	Yes	Compara, eggNOG, Hieranoid, Inparanoid, OMA, OrthoDB, OrthoFinder, OrthoInspector, orthoMCL, Panther, Phylome, RoundUp, TreeFam
FBgn0029992	31724	FBgn0029992	Upf2	Human	26019	17854	UPF2	13	12.79	high	Yes	Yes	Compara, eggNOG, Hieranoid, Homologene, Inparanoid, OMA, OrthoFinder, OrthoInspector, orthoMCL, Panther, Phylome, RoundUp, TreeFam
FBgn0030674	32510	FBgn0030674	CG8184	Human	10075	30892	HUWE1	13	12.79	high	Yes	Yes	Compara, eggNOG, Hieranoid, Homologene, Inparanoid, OMA, OrthoFinder, OrthoInspector, orthoMCL, Panther, Phylome, RoundUp, TreeFam
FBgn0030720	32568	FBgn0030720	CG8939	Human	117246	17136	FTSJ3	13	12.76	high	Yes	Yes	Compara, eggNOG, Hieranoid, Homologene, Inparanoid, Isobase, OMA, OrthoDB, OrthoFinder, OrthoInspector, orthoMCL, Panther, Phylome
FBgn0030739	32594	FBgn0030739	SWIP	Human	23325	29174	WASHC4	13	12.8	high	Yes	Yes	Compara, eggNOG, Hieranoid, Homologene, Inparanoid, OMA, OrthoDB, OrthoInspector, orthoMCL, Panther, Phylome, RoundUp, TreeFam
FBgn0031057	32977	FBgn0031057	Ubqn	Human	56893	1237	UBQLN4	13	12.8	moderate	No	Yes	Compara, eggNOG, Hieranoid, Inparanoid, OMA, OrthoDB, OrthoFinder, OrthoInspector, orthoMCL, Panther, Phylome, RoundUp, TreeFam
FBgn0031078	33002	FBgn0031078	Nup205	Human	23165	18658	NUP205	13	12.79	high	Yes	Yes	Compara, eggNOG, Hieranoid, Homologene, Inparanoid, OMA, OrthoFinder, OrthoInspector, orthoMCL, Panther, Phylome, RoundUp, TreeFam
FBgn0031107	33035	FBgn0031107	HERC2	Human	8924	4868	HERC2	13	12.9	high	Yes	Yes	Compara, eggNOG, Hieranoid, Homologene, Inparanoid, OMA, OrthoDB, OrthoFinder, OrthoInspector, Panther, Phylome, RoundUp, TreeFam
FBgn0031437	33444	FBgn0031437	Arpc5	Human	81873	23366	ARPC5L	13	12.8	moderate	No	Yes	Compara, eggNOG, Hieranoid, Inparanoid, OMA, OrthoDB, OrthoFinder, OrthoInspector, orthoMCL, Panther, Phylome, RoundUp, TreeFam
FBgn0031985	326157	FBgn0031985	mon2	Human	23041	29177	MON2	13	12.9	high	Yes	Yes	Compara, eggNOG, Hieranoid, Homologene, Inparanoid, OMA, OrthoDB, OrthoFinder, OrthoInspector, Panther, Phylome, RoundUp, TreeFam
FBgn0032208	34378	FBgn0032208	CG5604	Human	25831	20157	HECTD1	13	12.73	high	Yes	Yes	Compara, eggNOG, Hieranoid, Homologene, Inparanoid, Isobase, OrthoFinder, OrthoInspector, orthoMCL, Panther, Phylome, RoundUp, TreeFam
FBgn0032409	34633	FBgn0032409	Ced-12	Human	9844	16286	ELMO1	13	12.79	high	Yes	Yes	Compara, eggNOG, Hieranoid, Homologene, Inparanoid, OMA, OrthoFinder, OrthoInspector, orthoMCL, Panther, Phylome, RoundUp, TreeFam
FBgn0032702	35126	FBgn0032702	CG10376	Human	9647	19388	PPM1F	13	12.84	high	Yes	Yes	Compara, eggNOG, Hieranoid, Homologene, Inparanoid, Isobase, OrthoDB, OrthoFinder, OrthoInspector, Panther, Phylome, RoundUp, TreeFam
FBgn0033155	35648	FBgn0033155	Br140	Human	23774	1102	BRD1	13	12.8	high	Yes	Yes	Compara, eggNOG, Hieranoid, Inparanoid, OMA, OrthoDB, OrthoFinder, OrthoInspector, orthoMCL, Panther, Phylome, RoundUp, TreeFam
FBgn0033155	35648	FBgn0033155	Br140	Human	7862	14255	BRPF1	13	12.7	high	Yes	Yes	Compara, eggNOG, Hieranoid, Homologene, Inparanoid, OMA, OrthoDB, OrthoFinder, OrthoInspector, orthoMCL, Phylome, RoundUp, TreeFam
FBgn0033210	35713	FBgn0033210	U2A	Human	6627	11152	SNRPA1	13	12.75	high	Yes	Yes	Compara, eggNOG, Hieranoid, Homologene, OMA, OrthoDB, OrthoFinder, OrthoInspector, orthoMCL, Panther, Phylome, RoundUp, TreeFam
FBgn0033916	36580	FBgn0033916	Usp20-33	Human	10868	12619	USP20	13	12.84	high	Yes	Yes	Compara, eggNOG, Homologene, Inparanoid, Isobase, OMA, OrthoDB, OrthoFinder, OrthoInspector, orthoMCL, Panther, RoundUp, TreeFam
FBgn0033989	36675	FBgn0033989	CG7639	Human	25813	24276	SAMM50	13	12.85	high	Yes	Yes	Compara, eggNOG, Hieranoid, Inparanoid, Isobase, OMA, OrthoDB, OrthoFinder, OrthoInspector, Panther, Phylome, RoundUp, TreeFam
FBgn0034400	37176	FBgn0034400	CG15099	Human	9980	1291	DOPEY2	13	12.8	moderate	No	Yes	Compara, eggNOG, Hieranoid, Inparanoid, OMA, OrthoDB, OrthoFinder, OrthoInspector, orthoMCL, Panther, Phylome, RoundUp, TreeFam
FBgn0034401	37177	FBgn0034401	MetRS	Human	4141	6898	MARS	13	12.79	high	Yes	Yes	eggNOG, Hieranoid, Homologene, Inparanoid, Isobase, OMA, OrthoDB, OrthoFinder, OrthoInspector, orthoMCL, Panther, Phylome, TreeFam
FBgn0034734	37570	FBgn0034734	CG4554	Human	27340	17897	UTP20	13	12.79	high	Yes	Yes	Compara, eggNOG, Hieranoid, Homologene, Inparanoid, OMA, OrthoFinder, OrthoInspector, orthoMCL, Panther, Phylome, RoundUp, TreeFam
FBgn0035060	37961	FBgn0035060	Eps-15	Human	58513	24634	EPS15L1	13	12.84	high	Yes	Yes	Compara, eggNOG, Homologene, Inparanoid, Isobase, OMA, OrthoDB, OrthoFinder, OrthoInspector, orthoMCL, Panther, RoundUp, TreeFam
FBgn0035336	38303	FBgn0035336	CG9004	Human	64434	13244	NOM1	13	12.8	high	Yes	Yes	Compara, eggNOG, Hieranoid, Homologene, Inparanoid, OMA, OrthoDB, OrthoInspector, orthoMCL, Panther, Phylome, RoundUp, TreeFam
FBgn0035483	38472	FBgn0035483	Mul1	Human	79594	25762	MUL1	13	12.8	high	Yes	Yes	Compara, eggNOG, Hieranoid, Inparanoid, OMA, OrthoDB, OrthoFinder, OrthoInspector, orthoMCL, Panther, Phylome, RoundUp, TreeFam
FBgn0035793	38844	FBgn0035793	CG7546	Human	7917	13919	BAG6	13	12.8	high	Yes	Yes	Compara, eggNOG, Hieranoid, Inparanoid, OMA, OrthoDB, OrthoFinder, OrthoInspector, orthoMCL, Panther, Phylome, RoundUp, TreeFam
FBgn0036053	39160	FBgn0036053	iPLA2-VIA	Human	8398	9039	PLA2G6	13	12.82	high	Yes	Yes	Compara, Hieranoid, Homologene, Inparanoid, Isobase, OMA, OrthoDB, OrthoFinder, OrthoInspector, orthoMCL, Panther, Phylome, TreeFam
FBgn0036301	39437	FBgn0036301	CG4069	Human	54758	25272	KLHDC4	13	12.87	high	Yes	Yes	eggNOG, Hieranoid, Homologene, Inparanoid, OMA, OrthoDB, OrthoFinder, OrthoInspector, orthoMCL, Panther, Phylome, RoundUp, TreeFam
FBgn0036386	39535	FBgn0036386	CG8833	Human	55094	24658	GPATCH1	13	12.8	high	Yes	Yes	Compara, eggNOG, Hieranoid, Inparanoid, OMA, OrthoDB, OrthoFinder, OrthoInspector, orthoMCL, Panther, Phylome, RoundUp, TreeFam
FBgn0036515	39690	FBgn0036515	AIMP2	Human	7965	20609	AIMP2	13	12.8	high	Yes	Yes	Compara, eggNOG, Hieranoid, Inparanoid, OMA, OrthoDB, OrthoFinder, OrthoInspector, orthoMCL, Panther, Phylome, RoundUp, TreeFam
FBgn0036666	39881	FBgn0036666	TSG101	Human	7251	15971	TSG101	13	12.79	high	Yes	Yes	Compara, eggNOG, Hieranoid, Homologene, Inparanoid, OMA, OrthoFinder, OrthoInspector, orthoMCL, Panther, Phylome, RoundUp, TreeFam
FBgn0037094	40386	FBgn0037094	CG7611	Human	80232	21208	WDR26	13	12.77	high	Yes	Yes	Compara, eggNOG, Hieranoid, Homologene, Inparanoid, OMA, OrthoDB, OrthoFinder, OrthoInspector, orthoMCL, Panther, Phylome, TreeFam
FBgn0037382	40723	FBgn0037382	Hpr1	Human	9984	19070	THOC1	13	12.79	high	Yes	Yes	Compara, eggNOG, Hieranoid, Homologene, Inparanoid, OMA, OrthoFinder, OrthoInspector, orthoMCL, Panther, Phylome, RoundUp, TreeFam
FBgn0037660	41091	FBgn0037660	beag	Human	3550	5958	IK	13	12.87	high	Yes	Yes	eggNOG, Hieranoid, Homologene, Inparanoid, OMA, OrthoDB, OrthoFinder, OrthoInspector, orthoMCL, Panther, Phylome, RoundUp, TreeFam
FBgn0038473	42060	FBgn0038473	Ns1	Human	54552	25553	GNL3L	13	12.65	high	Yes	Yes	Compara, eggNOG, Hieranoid, Inparanoid, Isobase, OMA, OrthoDB, OrthoFinder, OrthoInspector, orthoMCL, Phylome, RoundUp, TreeFam
FBgn0038651	42256	FBgn0038651	Epg5	Human	57724	29331	EPG5	13	12.8	high	Yes	Yes	Compara, eggNOG, Hieranoid, Homologene, Inparanoid, OMA, OrthoDB, OrthoInspector, orthoMCL, Panther, Phylome, RoundUp, TreeFam
FBgn0039182	42899	FBgn0039182	CG5728	Human	22984	13408	PDCD11	13	12.74	high	Yes	Yes	Compara, eggNOG, Hieranoid, Inparanoid, Isobase, OrthoDB, OrthoFinder, OrthoInspector, orthoMCL, Panther, Phylome, RoundUp, TreeFam
FBgn0039188	42905	FBgn0039188	Golgin84	Human	9950	4428	GOLGA5	13	12.74	high	Yes	Yes	Compara, eggNOG, Hieranoid, Inparanoid, Isobase, OrthoDB, OrthoFinder, OrthoInspector, orthoMCL, Panther, Phylome, RoundUp, TreeFam
FBgn0039213	42934	FBgn0039213	atl	Human	51062	11231	ATL1	13	12.8	moderate	No	Yes	Compara, eggNOG, Hieranoid, Inparanoid, OMA, OrthoDB, OrthoFinder, OrthoInspector, orthoMCL, Panther, Phylome, RoundUp, TreeFam
FBgn0039213	42934	FBgn0039213	atl	Human	25923	24526	ATL3	13	12.8	moderate	No	Yes	Compara, eggNOG, Hieranoid, Inparanoid, OMA, OrthoDB, OrthoFinder, OrthoInspector, orthoMCL, Panther, Phylome, RoundUp, TreeFam
FBgn0039555	43345	FBgn0039555	mRpS22	Human	56945	14508	MRPS22	13	12.8	high	Yes	Yes	Compara, eggNOG, Homologene, Inparanoid, OMA, OrthoDB, OrthoFinder, OrthoInspector, orthoMCL, Panther, Phylome, RoundUp, TreeFam
FBgn0039776	43620	FBgn0039776	PH4alphaEFB	Human	8974	8547	P4HA2	13	12.8	moderate	No	Yes	Compara, eggNOG, Hieranoid, Inparanoid, OMA, OrthoDB, OrthoFinder, OrthoInspector, orthoMCL, Panther, Phylome, RoundUp, TreeFam
FBgn0040212	53586	FBgn0040212	Dhap-at	Human	8443	4416	GNPAT	13	12.74	high	Yes	Yes	Compara, eggNOG, Homologene, Inparanoid, Isobase, OrthoDB, OrthoFinder, OrthoInspector, orthoMCL, Panther, Phylome, RoundUp, TreeFam
FBgn0040236	53436	FBgn0040236	c11.1	Human	727957	26958	MROH1	13	12.79	high	Yes	Yes	Compara, eggNOG, Hieranoid, Homologene, Inparanoid, OMA, OrthoFinder, OrthoInspector, orthoMCL, Panther, Phylome, RoundUp, TreeFam
FBgn0040237	53565	FBgn0040237	bor	Human	55210	25567	ATAD3A	13	12.79	high	Yes	Yes	Compara, eggNOG, Hieranoid, Homologene, Inparanoid, OMA, OrthoFinder, OrthoInspector, orthoMCL, Panther, Phylome, RoundUp, TreeFam
FBgn0042178	59216	FBgn0042178	CG32165	Human	79711	19426	IPO4	13	12.77	moderate	Yes	No	Compara, eggNOG, Hieranoid, Homologene, Inparanoid, OMA, OrthoDB, OrthoFinder, OrthoInspector, orthoMCL, Panther, Phylome, TreeFam
FBgn0044323	34096	FBgn0044323	Cka	Human	6801	11424	STRN	13	12.8	moderate	No	Yes	Compara, eggNOG, Hieranoid, Inparanoid, OMA, OrthoDB, OrthoFinder, OrthoInspector, orthoMCL, Panther, Phylome, RoundUp, TreeFam
FBgn0051729	34736	FBgn0051729	CG31729	Human	374868	13541	ATP9B	13	12.72	high	Yes	Yes	Compara, eggNOG, Hieranoid, Homologene, Inparanoid, Isobase, OMA, OrthoDB, OrthoInspector, orthoMCL, Panther, Phylome, TreeFam
FBgn0052708	318161	FBgn0052708	CG32708	Human	29777	17369	ABT1	13	12.8	high	Yes	Yes	Compara, eggNOG, Hieranoid, Inparanoid, OMA, OrthoDB, OrthoFinder, OrthoInspector, orthoMCL, Panther, Phylome, RoundUp, TreeFam
FBgn0085436	5740252	FBgn0085436	Not1	Human	23019	7877	CNOT1	13	12.77	high	Yes	Yes	Compara, eggNOG, Hieranoid, Homologene, Inparanoid, OMA, OrthoDB, OrthoFinder, OrthoInspector, orthoMCL, Panther, Phylome, TreeFam
FBgn0086129	37857	FBgn0086129	snama	Human	5930	9889	RBBP6	13	12.74	high	Yes	Yes	Compara, eggNOG, Hieranoid, Inparanoid, Isobase, OrthoDB, OrthoFinder, OrthoInspector, orthoMCL, Panther, Phylome, RoundUp, TreeFam
FBgn0086356	36538	FBgn0086356	tum	Human	29127	9804	RACGAP1	13	12.84	high	Yes	Yes	Compara, eggNOG, Homologene, Inparanoid, Isobase, OMA, OrthoDB, OrthoFinder, OrthoInspector, orthoMCL, Panther, RoundUp, TreeFam
FBgn0260655	40140	FBgn0260655	l(3)76BDm	Human	22878	29169	TRAPPC8	13	12.79	high	Yes	Yes	Compara, eggNOG, Hieranoid, Homologene, Inparanoid, OMA, OrthoFinder, OrthoInspector, orthoMCL, Panther, Phylome, RoundUp, TreeFam
FBgn0261109	39688	FBgn0261109	mrn	Human	2968	4658	GTF2H4	13	12.79	high	Yes	Yes	Compara, eggNOG, Hieranoid, Homologene, Inparanoid, OMA, OrthoFinder, OrthoInspector, orthoMCL, Panther, Phylome, RoundUp, TreeFam
FBgn0261268	34896	FBgn0261268	Cul3	Human	8452	2553	CUL3	13	12.9	high	Yes	Yes	Compara, eggNOG, Hieranoid, Homologene, Inparanoid, OMA, OrthoDB, OrthoFinder, OrthoInspector, Panther, Phylome, RoundUp, TreeFam
FBgn0261286	41973	FBgn0261286	Mat89Ba	Human	65083	19910	NOL6	13	12.84	high	Yes	Yes	Compara, eggNOG, Hieranoid, Homologene, Inparanoid, OMA, OrthoDB, OrthoFinder, OrthoInspector, orthoMCL, Panther, Phylome, RoundUp
FBgn0261396	35176	FBgn0261396	Rpn3	Human	5709	9560	PSMD3	13	12.9	high	Yes	Yes	Compara, eggNOG, Hieranoid, Homologene, Inparanoid, OMA, OrthoDB, OrthoFinder, OrthoInspector, Panther, Phylome, RoundUp, TreeFam
FBgn0261397	35680	FBgn0261397	didum	Human	4645	7603	MYO5B	13	12.8	high	Yes	Yes	Compara, eggNOG, Hieranoid, Inparanoid, OMA, OrthoDB, OrthoFinder, OrthoInspector, orthoMCL, Panther, Phylome, RoundUp, TreeFam
FBgn0261397	35680	FBgn0261397	didum	Human	4644	7602	MYO5A	13	12.79	high	Yes	Yes	Compara, eggNOG, Hieranoid, Homologene, Inparanoid, OMA, OrthoFinder, OrthoInspector, orthoMCL, Panther, Phylome, RoundUp, TreeFam
FBgn0262127	41783	FBgn0262127	kibra	Human	23286	29435	WWC1	13	12.8	high	Yes	Yes	Compara, eggNOG, Hieranoid, Inparanoid, OMA, OrthoDB, OrthoFinder, OrthoInspector, orthoMCL, Panther, Phylome, RoundUp, TreeFam
FBgn0262127	41783	FBgn0262127	kibra	Human	80014	24148	WWC2	13	12.8	high	Yes	Yes	Compara, eggNOG, Hieranoid, Inparanoid, OMA, OrthoDB, OrthoFinder, OrthoInspector, orthoMCL, Panther, Phylome, RoundUp, TreeFam
FBgn0262716	38898	FBgn0262716	Arp3	Human	57180	17256	ACTR3B	13	12.8	moderate	No	Yes	Compara, eggNOG, Hieranoid, Inparanoid, OMA, OrthoDB, OrthoFinder, OrthoInspector, orthoMCL, Panther, Phylome, RoundUp, TreeFam
FBgn0264855	33211	FBgn0264855	AP-2alpha	Human	160	561	AP2A1	13	12.8	moderate	No	Yes	Compara, eggNOG, Hieranoid, Inparanoid, OMA, OrthoDB, OrthoFinder, OrthoInspector, orthoMCL, Panther, Phylome, RoundUp, TreeFam
FBgn0265778	33881	FBgn0265778	PDZ-GEF	Human	9693	16854	RAPGEF2	13	12.8	high	Yes	Yes	Compara, eggNOG, Hieranoid, Inparanoid, OMA, OrthoDB, OrthoFinder, OrthoInspector, orthoMCL, Panther, Phylome, RoundUp, TreeFam
FBgn0265935	35596	FBgn0265935	coro	Human	11151	2252	CORO1A	13	12.8	moderate	No	Yes	Compara, eggNOG, Hieranoid, Inparanoid, OMA, OrthoDB, OrthoFinder, OrthoInspector, orthoMCL, Panther, Phylome, RoundUp, TreeFam
FBgn0265935	35596	FBgn0265935	coro	Human	57175	2253	CORO1B	13	12.8	moderate	No	Yes	Compara, eggNOG, Hieranoid, Inparanoid, OMA, OrthoDB, OrthoFinder, OrthoInspector, orthoMCL, Panther, Phylome, RoundUp, TreeFam
FBgn0283469	32777	FBgn0283469	Vps4	Human	9525	10895	VPS4B	13	12.65	moderate	No	Yes	Compara, eggNOG, Hieranoid, Inparanoid, Isobase, OMA, OrthoDB, OrthoFinder, OrthoInspector, orthoMCL, Phylome, RoundUp, TreeFam
FBgn0000377	31208	FBgn0000377	crn	Human	51340	15762	CRNKL1	14	13.8	high	Yes	Yes	Compara, eggNOG, Hieranoid, Homologene, Inparanoid, OMA, OrthoDB, OrthoFinder, OrthoInspector, orthoMCL, Panther, Phylome, RoundUp, TreeFam
FBgn0000499	32078	FBgn0000499	dsh	Human	1857	3087	DVL3	14	13.8	high	Yes	Yes	Compara, eggNOG, Hieranoid, Homologene, Inparanoid, OMA, OrthoDB, OrthoFinder, OrthoInspector, orthoMCL, Panther, Phylome, RoundUp, TreeFam
FBgn0000667	31166	FBgn0000667	Actn	Human	88	164	ACTN2	14	13.75	high	Yes	Yes	Compara, eggNOG, Hieranoid, Inparanoid, Isobase, OMA, OrthoDB, OrthoFinder, OrthoInspector, orthoMCL, Panther, Phylome, RoundUp, TreeFam
FBgn0001961	34793	FBgn0001961	Arpc1	Human	10552	703	ARPC1A	14	13.8	high	Yes	Yes	Compara, eggNOG, Hieranoid, Homologene, Inparanoid, OMA, OrthoDB, OrthoFinder, OrthoInspector, orthoMCL, Panther, Phylome, RoundUp, TreeFam
FBgn0002736	37402	FBgn0002736	mago	Human	55110	25504	MAGOHB	14	13.8	high	Yes	Yes	Compara, eggNOG, Hieranoid, Homologene, Inparanoid, OMA, OrthoDB, OrthoFinder, OrthoInspector, orthoMCL, Panther, Phylome, RoundUp, TreeFam
FBgn0002787	37894	FBgn0002787	Rpn8	Human	5713	9565	PSMD7	14	13.79	high	Yes	Yes	Compara, eggNOG, Hieranoid, Homologene, Inparanoid, Isobase, OMA, OrthoDB, OrthoFinder, OrthoInspector, orthoMCL, Panther, Phylome, RoundUp
FBgn0003656	31716	FBgn0003656	sws	Human	375775	24768	PNPLA7	14	13.8	high	Yes	Yes	Compara, eggNOG, Hieranoid, Homologene, Inparanoid, OMA, OrthoDB, OrthoFinder, OrthoInspector, orthoMCL, Panther, Phylome, RoundUp, TreeFam
FBgn0010246	38153	FBgn0010246	Myo61F	Human	4641	7597	MYO1C	14	13.8	high	Yes	Yes	Compara, eggNOG, Hieranoid, Homologene, Inparanoid, OMA, OrthoDB, OrthoFinder, OrthoInspector, orthoMCL, Panther, Phylome, RoundUp, TreeFam
FBgn0010356	47900	FBgn0010356	Taf5	Human	6877	11539	TAF5	14	13.8	high	Yes	Yes	Compara, eggNOG, Hieranoid, Homologene, Inparanoid, OMA, OrthoDB, OrthoFinder, OrthoInspector, orthoMCL, Panther, Phylome, RoundUp, TreeFam
FBgn0010380	32987	FBgn0010380	AP-1-2beta	Human	162	554	AP1B1	14	13.8	high	Yes	Yes	Compara, eggNOG, Hieranoid, Homologene, Inparanoid, OMA, OrthoDB, OrthoFinder, OrthoInspector, orthoMCL, Panther, Phylome, RoundUp, TreeFam
FBgn0010531	46035	FBgn0010531	Ccs	Human	9973	1613	CCS	14	13.8	high	Yes	Yes	Compara, eggNOG, Hieranoid, Homologene, Inparanoid, OMA, OrthoDB, OrthoFinder, OrthoInspector, orthoMCL, Panther, Phylome, RoundUp, TreeFam
FBgn0010590	46058	FBgn0010590	Prosbeta1	Human	5694	9543	PSMB6	14	13.75	high	Yes	Yes	Compara, eggNOG, Hieranoid, Inparanoid, Isobase, OMA, OrthoDB, OrthoFinder, OrthoInspector, orthoMCL, Panther, Phylome, RoundUp, TreeFam
FBgn0010926	46201	FBgn0010926	l(3)07882	Human	8602	16821	NOP14	14	13.8	high	Yes	Yes	Compara, eggNOG, Hieranoid, Homologene, Inparanoid, OMA, OrthoDB, OrthoFinder, OrthoInspector, orthoMCL, Panther, Phylome, RoundUp, TreeFam
FBgn0011327	39102	FBgn0011327	Uch-L5	Human	51377	19678	UCHL5	14	13.74	high	Yes	Yes	Compara, eggNOG, Hieranoid, Homologene, Inparanoid, Isobase, OMA, OrthoFinder, OrthoInspector, orthoMCL, Panther, Phylome, RoundUp, TreeFam
FBgn0011742	32623	FBgn0011742	Arp2	Human	10097	169	ACTR2	14	13.8	high	Yes	Yes	Compara, eggNOG, Hieranoid, Homologene, Inparanoid, OMA, OrthoDB, OrthoFinder, OrthoInspector, orthoMCL, Panther, Phylome, RoundUp, TreeFam
FBgn0011771	40462	FBgn0011771	Hem	Human	10787	7666	NCKAP1	14	13.8	high	Yes	Yes	Compara, eggNOG, Hieranoid, Homologene, Inparanoid, OMA, OrthoDB, OrthoFinder, OrthoInspector, orthoMCL, Panther, Phylome, RoundUp, TreeFam
FBgn0015024	32221	FBgn0015024	CkIalpha	Human	1452	2451	CSNK1A1	14	13.82	high	Yes	Yes	eggNOG, Hieranoid, Homologene, Inparanoid, Isobase, OMA, OrthoDB, OrthoFinder, OrthoInspector, orthoMCL, Panther, Phylome, RoundUp, TreeFam
FBgn0015282	42828	FBgn0015282	Rpt2	Human	5700	9547	PSMC1	14	13.8	high	Yes	Yes	Compara, eggNOG, Hieranoid, Homologene, Inparanoid, OMA, OrthoDB, OrthoFinder, OrthoInspector, orthoMCL, Panther, Phylome, RoundUp, TreeFam
FBgn0019957	42591	FBgn0019957	ND-42	Human	4705	7684	NDUFA10	14	13.74	high	Yes	Yes	Compara, eggNOG, Hieranoid, Homologene, Inparanoid, Isobase, OrthoDB, OrthoFinder, OrthoInspector, orthoMCL, Panther, Phylome, RoundUp, TreeFam
FBgn0019960	42587	FBgn0019960	Mitofilin	Human	10989	6047	IMMT	14	13.8	high	Yes	Yes	Compara, eggNOG, Hieranoid, Homologene, Inparanoid, OMA, OrthoDB, OrthoFinder, OrthoInspector, orthoMCL, Panther, Phylome, RoundUp, TreeFam
FBgn0022942	44409	FBgn0022942	Cbp80	Human	4686	7658	NCBP1	14	13.8	high	Yes	Yes	Compara, eggNOG, Hieranoid, Homologene, Inparanoid, OMA, OrthoDB, OrthoFinder, OrthoInspector, orthoMCL, Panther, Phylome, RoundUp, TreeFam
FBgn0023174	39628	FBgn0023174	Prosbeta2	Human	5695	9544	PSMB7	14	13.74	high	Yes	Yes	Compara, eggNOG, Hieranoid, Homologene, Inparanoid, Isobase, OMA, OrthoFinder, OrthoInspector, orthoMCL, Panther, Phylome, RoundUp, TreeFam
FBgn0023388	35378	FBgn0023388	Dap160	Human	6453	6183	ITSN1	14	13.8	high	Yes	Yes	Compara, eggNOG, Hieranoid, Homologene, Inparanoid, OMA, OrthoDB, OrthoFinder, OrthoInspector, orthoMCL, Panther, Phylome, RoundUp, TreeFam
FBgn0023517	31143	FBgn0023517	Pgam5	Human	192111	28763	PGAM5	14	13.8	high	Yes	Yes	Compara, eggNOG, Hieranoid, Homologene, Inparanoid, OMA, OrthoDB, OrthoFinder, OrthoInspector, orthoMCL, Panther, Phylome, RoundUp, TreeFam
FBgn0026409	39587	FBgn0026409	Mpcp	Human	5250	10989	SLC25A3	14	13.75	moderate	Yes	No	Compara, eggNOG, Hieranoid, Inparanoid, Isobase, OMA, OrthoDB, OrthoFinder, OrthoInspector, orthoMCL, Panther, Phylome, RoundUp, TreeFam
FBgn0027330	31811	FBgn0027330	l(1)G0020	Human	55226	29830	NAT10	14	13.74	high	Yes	Yes	Compara, eggNOG, Hieranoid, Homologene, Inparanoid, Isobase, OrthoDB, OrthoFinder, OrthoInspector, orthoMCL, Panther, Phylome, RoundUp, TreeFam
FBgn0027568	34403	FBgn0027568	Cand1	Human	55832	30688	CAND1	14	13.8	high	Yes	Yes	Compara, eggNOG, Hieranoid, Homologene, Inparanoid, OMA, OrthoDB, OrthoFinder, OrthoInspector, orthoMCL, Panther, Phylome, RoundUp, TreeFam
FBgn0027572	37028	FBgn0027572	CG5009	Human	51	119	ACOX1	14	13.74	high	Yes	Yes	Compara, eggNOG, Hieranoid, Homologene, Inparanoid, Isobase, OrthoDB, OrthoFinder, OrthoInspector, orthoMCL, Panther, Phylome, RoundUp, TreeFam
FBgn0028689	36638	FBgn0028689	Rpn6	Human	5717	9556	PSMD11	14	13.72	high	Yes	Yes	Compara, eggNOG, Hieranoid, Homologene, Inparanoid, Isobase, OMA, OrthoDB, OrthoFinder, OrthoInspector, orthoMCL, Panther, Phylome, TreeFam
FBgn0029006	36999	FBgn0029006	Smurf	Human	64750	16809	SMURF2	14	13.8	high	Yes	Yes	Compara, eggNOG, Hieranoid, Homologene, Inparanoid, OMA, OrthoDB, OrthoFinder, OrthoInspector, orthoMCL, Panther, Phylome, RoundUp, TreeFam
FBgn0029755	31447	FBgn0029755	Sas10	Human	57050	24477	UTP3	14	13.8	high	Yes	Yes	Compara, eggNOG, Hieranoid, Homologene, Inparanoid, OMA, OrthoDB, OrthoFinder, OrthoInspector, orthoMCL, Panther, Phylome, RoundUp, TreeFam
FBgn0030081	31833	FBgn0030081	CG7246	Human	55813	18279	UTP6	14	13.8	high	Yes	Yes	Compara, eggNOG, Hieranoid, Homologene, Inparanoid, OMA, OrthoDB, OrthoFinder, OrthoInspector, orthoMCL, Panther, Phylome, RoundUp, TreeFam
FBgn0030365	32168	FBgn0030365	Tango4	Human	5356	9089	PLRG1	14	13.8	high	Yes	Yes	Compara, eggNOG, Hieranoid, Homologene, Inparanoid, OMA, OrthoDB, OrthoFinder, OrthoInspector, orthoMCL, Panther, Phylome, RoundUp, TreeFam
FBgn0030504	32320	FBgn0030504	CG2691	Human	23223	29100	RRP12	14	13.8	high	Yes	Yes	Compara, eggNOG, Hieranoid, Homologene, Inparanoid, OMA, OrthoDB, OrthoFinder, OrthoInspector, orthoMCL, Panther, Phylome, RoundUp, TreeFam
FBgn0030944	32852	FBgn0030944	CG6617	Human	54994	15857	GID8	14	13.8	high	Yes	Yes	Compara, eggNOG, Hieranoid, Homologene, Inparanoid, OMA, OrthoDB, OrthoFinder, OrthoInspector, orthoMCL, Panther, Phylome, RoundUp, TreeFam
FBgn0031057	32977	FBgn0031057	Ubqn	Human	29979	12508	UBQLN1	14	13.8	high	Yes	Yes	Compara, eggNOG, Hieranoid, Homologene, Inparanoid, OMA, OrthoDB, OrthoFinder, OrthoInspector, orthoMCL, Panther, Phylome, RoundUp, TreeFam
FBgn0031229	33180	FBgn0031229	CG3436	Human	9410	30857	SNRNP40	14	13.8	high	Yes	Yes	Compara, eggNOG, Hieranoid, Homologene, Inparanoid, OMA, OrthoDB, OrthoFinder, OrthoInspector, orthoMCL, Panther, Phylome, RoundUp, TreeFam
FBgn0031266	33235	FBgn0031266	CG2807	Human	23451	10768	SF3B1	14	13.8	high	Yes	Yes	Compara, eggNOG, Hieranoid, Homologene, Inparanoid, OMA, OrthoDB, OrthoFinder, OrthoInspector, orthoMCL, Panther, Phylome, RoundUp, TreeFam
FBgn0031390	326153	FBgn0031390	tho2	Human	57187	19073	THOC2	14	13.8	high	Yes	Yes	Compara, eggNOG, Hieranoid, Homologene, Inparanoid, OMA, OrthoDB, OrthoFinder, OrthoInspector, orthoMCL, Panther, Phylome, RoundUp, TreeFam
FBgn0031437	33444	FBgn0031437	Arpc5	Human	10092	708	ARPC5	14	13.8	high	Yes	Yes	Compara, eggNOG, Hieranoid, Homologene, Inparanoid, OMA, OrthoDB, OrthoFinder, OrthoInspector, orthoMCL, Panther, Phylome, RoundUp, TreeFam
FBgn0031450	33458	FBgn0031450	Hrs	Human	9146	4897	HGS	14	13.72	high	Yes	Yes	Compara, eggNOG, Hieranoid, Homologene, Inparanoid, Isobase, OMA, OrthoDB, OrthoFinder, OrthoInspector, orthoMCL, Panther, Phylome, TreeFam
FBgn0031868	33964	FBgn0031868	Rat1	Human	22803	12836	XRN2	14	13.7	high	Yes	Yes	Compara, eggNOG, Hieranoid, Homologene, Isobase, OMA, OrthoDB, OrthoFinder, OrthoInspector, orthoMCL, Panther, Phylome, RoundUp, TreeFam
FBgn0031979	34097	FBgn0031979	CCDC53	Human	51019	24256	WASHC3	14	13.8	high	Yes	Yes	Compara, eggNOG, Hieranoid, Homologene, Inparanoid, OMA, OrthoDB, OrthoFinder, OrthoInspector, orthoMCL, Panther, Phylome, RoundUp, TreeFam
FBgn0031995	34114	FBgn0031995	CG8475	Human	5257	8927	PHKB	14	13.8	high	Yes	Yes	Compara, eggNOG, Hieranoid, Homologene, Inparanoid, OMA, OrthoDB, OrthoFinder, OrthoInspector, orthoMCL, Panther, Phylome, RoundUp, TreeFam
FBgn0032258	34442	FBgn0032258	CG7456	Human	25839	18620	COG4	14	13.8	high	Yes	Yes	Compara, eggNOG, Hieranoid, Homologene, Inparanoid, OMA, OrthoDB, OrthoFinder, OrthoInspector, orthoMCL, Panther, Phylome, RoundUp, TreeFam
FBgn0032596	34999	FBgn0032596	Prosbeta4	Human	5690	9539	PSMB2	14	13.8	high	Yes	Yes	Compara, eggNOG, Hieranoid, Homologene, Inparanoid, OMA, OrthoDB, OrthoFinder, OrthoInspector, orthoMCL, Panther, Phylome, RoundUp, TreeFam
FBgn0032859	35311	FBgn0032859	Arpc2	Human	10109	705	ARPC2	14	13.8	high	Yes	Yes	Compara, eggNOG, Hieranoid, Homologene, Inparanoid, OMA, OrthoDB, OrthoFinder, OrthoInspector, orthoMCL, Panther, Phylome, RoundUp, TreeFam
FBgn0032925	35386	FBgn0032925	CG9246	Human	26155	24517	NOC2L	14	13.8	high	Yes	Yes	Compara, eggNOG, Hieranoid, Homologene, Inparanoid, OMA, OrthoDB, OrthoFinder, OrthoInspector, orthoMCL, Panther, Phylome, RoundUp, TreeFam
FBgn0033062	35539	FBgn0033062	Ars2	Human	51593	24101	SRRT	14	13.8	high	Yes	Yes	Compara, eggNOG, Hieranoid, Homologene, Inparanoid, OMA, OrthoDB, OrthoFinder, OrthoInspector, orthoMCL, Panther, Phylome, RoundUp, TreeFam
FBgn0033194	35693	FBgn0033194	Vps13	Human	23230	1908	VPS13A	14	13.8	high	Yes	Yes	Compara, eggNOG, Hieranoid, Homologene, Inparanoid, OMA, OrthoDB, OrthoFinder, OrthoInspector, orthoMCL, Panther, Phylome, RoundUp, TreeFam
FBgn0033246	35761	FBgn0033246	ACC	Human	31	84	ACACA	14	13.75	high	Yes	Yes	Compara, eggNOG, Hieranoid, Homologene, Inparanoid, Isobase, OMA, OrthoDB, OrthoInspector, orthoMCL, Panther, Phylome, RoundUp, TreeFam
FBgn0033379	35925	FBgn0033379	Mys45A	Human	55153	25537	SDAD1	14	13.8	high	Yes	Yes	Compara, eggNOG, Hieranoid, Homologene, Inparanoid, OMA, OrthoDB, OrthoFinder, OrthoInspector, orthoMCL, Panther, Phylome, RoundUp, TreeFam
FBgn0033556	36143	FBgn0033556	CG12343	Human	25949	19824	SYF2	14	13.8	high	Yes	Yes	Compara, eggNOG, Hieranoid, Homologene, Inparanoid, OMA, OrthoDB, OrthoFinder, OrthoInspector, orthoMCL, Panther, Phylome, RoundUp, TreeFam
FBgn0033859	36514	FBgn0033859	fand	Human	56949	14089	XAB2	14	13.8	high	Yes	Yes	Compara, eggNOG, Hieranoid, Homologene, Inparanoid, OMA, OrthoDB, OrthoFinder, OrthoInspector, orthoMCL, Panther, Phylome, RoundUp, TreeFam
FBgn0034243	36989	FBgn0034243	Ns2	Human	29889	29925	GNL2	14	13.8	high	Yes	Yes	Compara, eggNOG, Hieranoid, Homologene, Inparanoid, OMA, OrthoDB, OrthoFinder, OrthoInspector, orthoMCL, Panther, Phylome, RoundUp, TreeFam
FBgn0034400	37176	FBgn0034400	CG15099	Human	23033	21194	DOPEY1	14	13.8	high	Yes	Yes	Compara, eggNOG, Hieranoid, Homologene, Inparanoid, OMA, OrthoDB, OrthoFinder, OrthoInspector, orthoMCL, Panther, Phylome, RoundUp, TreeFam
FBgn0034577	37387	FBgn0034577	cpa	Human	829	1488	CAPZA1	14	13.8	high	Yes	Yes	Compara, eggNOG, Hieranoid, Homologene, Inparanoid, OMA, OrthoDB, OrthoFinder, OrthoInspector, orthoMCL, Panther, Phylome, RoundUp, TreeFam
FBgn0034577	37387	FBgn0034577	cpa	Human	830	1490	CAPZA2	14	13.75	high	Yes	Yes	Compara, eggNOG, Hieranoid, Inparanoid, Isobase, OMA, OrthoDB, OrthoFinder, OrthoInspector, orthoMCL, Panther, Phylome, RoundUp, TreeFam
FBgn0035141	38069	FBgn0035141	Cypl	Human	51645	9260	PPIL1	14	13.8	high	Yes	Yes	Compara, eggNOG, Hieranoid, Homologene, Inparanoid, OMA, OrthoDB, OrthoFinder, OrthoInspector, orthoMCL, Panther, Phylome, RoundUp, TreeFam
FBgn0035244	38193	FBgn0035244	ABCB7	Human	22	48	ABCB7	14	13.8	high	Yes	Yes	Compara, eggNOG, Hieranoid, Homologene, Inparanoid, OMA, OrthoDB, OrthoFinder, OrthoInspector, orthoMCL, Panther, Phylome, RoundUp, TreeFam
FBgn0035589	38599	FBgn0035589	CHMP2B	Human	25978	24537	CHMP2B	14	13.8	high	Yes	Yes	Compara, eggNOG, Hieranoid, Homologene, Inparanoid, OMA, OrthoDB, OrthoFinder, OrthoInspector, orthoMCL, Panther, Phylome, RoundUp, TreeFam
FBgn0035771	38819	FBgn0035771	Sec63	Human	11231	21082	SEC63	14	13.8	high	Yes	Yes	Compara, eggNOG, Hieranoid, Homologene, Inparanoid, OMA, OrthoDB, OrthoFinder, OrthoInspector, orthoMCL, Panther, Phylome, RoundUp, TreeFam
FBgn0036571	39766	FBgn0036571	Strumpellin	Human	9897	28984	WASHC5	14	13.8	high	Yes	Yes	Compara, eggNOG, Hieranoid, Homologene, Inparanoid, OMA, OrthoDB, OrthoFinder, OrthoInspector, orthoMCL, Panther, Phylome, RoundUp, TreeFam
FBgn0036828	40064	FBgn0036828	CG6841	Human	24148	15860	PRPF6	14	13.74	high	Yes	Yes	Compara, eggNOG, Hieranoid, Homologene, Inparanoid, Isobase, OMA, OrthoFinder, OrthoInspector, orthoMCL, Panther, Phylome, RoundUp, TreeFam
FBgn0037020	40294	FBgn0037020	Pex14	Human	5195	8856	PEX14	14	13.8	high	Yes	Yes	Compara, eggNOG, Hieranoid, Homologene, Inparanoid, OMA, OrthoDB, OrthoFinder, OrthoInspector, orthoMCL, Panther, Phylome, RoundUp, TreeFam
FBgn0037710	41152	FBgn0037710	CG9393	Human	4580	7504	MTX1	14	13.8	high	Yes	Yes	Compara, eggNOG, Hieranoid, Homologene, Inparanoid, OMA, OrthoDB, OrthoFinder, OrthoInspector, orthoMCL, Panther, Phylome, RoundUp, TreeFam
FBgn0037878	41346	FBgn0037878	CG6693	Human	23234	19123	DNAJC9	14	13.8	high	Yes	Yes	Compara, eggNOG, Hieranoid, Homologene, Inparanoid, OMA, OrthoDB, OrthoFinder, OrthoInspector, orthoMCL, Panther, Phylome, RoundUp, TreeFam
FBgn0037894	41367	FBgn0037894	Ranbp9	Human	55705	19425	IPO9	14	13.8	high	Yes	Yes	Compara, eggNOG, Hieranoid, Homologene, Inparanoid, OMA, OrthoDB, OrthoFinder, OrthoInspector, orthoMCL, Panther, Phylome, RoundUp, TreeFam
FBgn0038206	41719	FBgn0038206	twf	Human	5756	9620	TWF1	14	13.8	high	Yes	Yes	Compara, eggNOG, Hieranoid, Homologene, Inparanoid, OMA, OrthoDB, OrthoFinder, OrthoInspector, orthoMCL, Panther, Phylome, RoundUp, TreeFam
FBgn0038320	41861	FBgn0038320	Sra-1	Human	23191	13759	CYFIP1	14	13.75	moderate	No	Yes	Compara, eggNOG, Hieranoid, Inparanoid, Isobase, OMA, OrthoDB, OrthoFinder, OrthoInspector, orthoMCL, Panther, Phylome, RoundUp, TreeFam
FBgn0038369	41917	FBgn0038369	Arpc3A	Human	10094	706	ARPC3	14	13.8	high	Yes	Yes	Compara, eggNOG, Hieranoid, Homologene, Inparanoid, OMA, OrthoDB, OrthoFinder, OrthoInspector, orthoMCL, Panther, Phylome, RoundUp, TreeFam
FBgn0038585	42183	FBgn0038585	Non3	Human	84154	20870	RPF2	14	13.8	high	Yes	Yes	Compara, eggNOG, Hieranoid, Homologene, Inparanoid, OMA, OrthoDB, OrthoFinder, OrthoInspector, orthoMCL, Panther, Phylome, RoundUp, TreeFam
FBgn0038666	42272	FBgn0038666	Smu1	Human	55234	18247	SMU1	14	13.8	high	Yes	Yes	Compara, eggNOG, Hieranoid, Homologene, Inparanoid, OMA, OrthoDB, OrthoFinder, OrthoInspector, orthoMCL, Panther, Phylome, RoundUp, TreeFam
FBgn0038927	42593	FBgn0038927	CG6015	Human	51362	17350	CDC40	14	13.8	high	Yes	Yes	Compara, eggNOG, Hieranoid, Homologene, Inparanoid, OMA, OrthoDB, OrthoFinder, OrthoInspector, orthoMCL, Panther, Phylome, RoundUp, TreeFam
FBgn0039214	42935	FBgn0039214	puf	Human	9736	20066	USP34	14	13.65	high	Yes	Yes	Compara, eggNOG, Hieranoid, Homologene, Inparanoid, Isobase, OMA, OrthoDB, OrthoFinder, OrthoInspector, orthoMCL, Phylome, RoundUp, TreeFam
FBgn0039558	43348	FBgn0039558	BCAS2	Human	10286	975	BCAS2	14	13.8	high	Yes	Yes	Compara, eggNOG, Hieranoid, Homologene, Inparanoid, OMA, OrthoDB, OrthoFinder, OrthoInspector, orthoMCL, Panther, Phylome, RoundUp, TreeFam
FBgn0039566	43358	FBgn0039566	CG4849	Human	9343	30858	EFTUD2	14	13.85	high	Yes	Yes	Compara, eggNOG, Hieranoid, Homologene, Inparanoid, Isobase, OMA, OrthoDB, OrthoFinder, OrthoInspector, Panther, Phylome, RoundUp, TreeFam
FBgn0040068	32920	FBgn0040068	Vav	Human	7409	12657	VAV1	14	13.74	high	Yes	Yes	Compara, eggNOG, Hieranoid, Homologene, Inparanoid, Isobase, OMA, OrthoFinder, OrthoInspector, orthoMCL, Panther, Phylome, RoundUp, TreeFam
FBgn0042177	59215	FBgn0042177	CG32164	Human	79711	19426	IPO4	14	13.8	high	Yes	Yes	Compara, eggNOG, Hieranoid, Homologene, Inparanoid, OMA, OrthoDB, OrthoFinder, OrthoInspector, orthoMCL, Panther, Phylome, RoundUp, TreeFam
FBgn0042185	59223	FBgn0042185	CG18769	Human	90550	23526	MCU	14	13.8	high	Yes	Yes	Compara, eggNOG, Hieranoid, Homologene, Inparanoid, OMA, OrthoDB, OrthoFinder, OrthoInspector, orthoMCL, Panther, Phylome, RoundUp, TreeFam
FBgn0050349	35885	FBgn0050349	CG30349	Human	23160	28945	WDR43	14	13.8	high	Yes	Yes	Compara, eggNOG, Hieranoid, Homologene, Inparanoid, OMA, OrthoDB, OrthoFinder, OrthoInspector, orthoMCL, Panther, Phylome, RoundUp, TreeFam
FBgn0051368	41437	FBgn0051368	CG31368	Human	9716	29513	AQR	14	13.85	high	Yes	Yes	Compara, eggNOG, Hieranoid, Homologene, Inparanoid, Isobase, OMA, OrthoDB, OrthoFinder, OrthoInspector, Panther, Phylome, RoundUp, TreeFam
FBgn0053505	3346176	FBgn0053505	U3-55K	Human	9136	16829	RRP9	14	13.8	high	Yes	Yes	Compara, eggNOG, Hieranoid, Homologene, Inparanoid, OMA, OrthoDB, OrthoFinder, OrthoInspector, orthoMCL, Panther, Phylome, RoundUp, TreeFam
FBgn0053554	35483	FBgn0053554	Nipped-A	Human	8295	12347	TRRAP	14	13.72	high	Yes	Yes	Compara, eggNOG, Hieranoid, Homologene, Inparanoid, Isobase, OMA, OrthoDB, OrthoFinder, OrthoInspector, orthoMCL, Panther, Phylome, TreeFam
FBgn0086384	32979	FBgn0086384	Mer	Human	4771	7773	NF2	14	13.8	high	Yes	Yes	Compara, eggNOG, Hieranoid, Homologene, Inparanoid, OMA, OrthoDB, OrthoFinder, OrthoInspector, orthoMCL, Panther, Phylome, RoundUp, TreeFam
FBgn0086442	35170	FBgn0086442	mib2	Human	142678	30577	MIB2	14	13.75	high	Yes	Yes	Compara, eggNOG, Hieranoid, Homologene, Inparanoid, Isobase, OMA, OrthoDB, OrthoInspector, orthoMCL, Panther, Phylome, RoundUp, TreeFam
FBgn0086444	35192	FBgn0086444	l(2)37Cb	Human	8449	2739	DHX16	14	13.8	high	Yes	Yes	Compara, eggNOG, Hieranoid, Homologene, Inparanoid, OMA, OrthoDB, OrthoFinder, OrthoInspector, orthoMCL, Panther, Phylome, RoundUp, TreeFam
FBgn0086451	33960	FBgn0086451	l(2)k09022	Human	55127	25517	HEATR1	14	13.8	high	Yes	Yes	Compara, eggNOG, Hieranoid, Homologene, Inparanoid, OMA, OrthoDB, OrthoFinder, OrthoInspector, orthoMCL, Panther, Phylome, RoundUp, TreeFam
FBgn0086605	40557	FBgn0086605	CG9853	Human	51608	21690	GET4	14	13.8	high	Yes	Yes	Compara, eggNOG, Hieranoid, Homologene, Inparanoid, OMA, OrthoDB, OrthoFinder, OrthoInspector, orthoMCL, Panther, Phylome, RoundUp, TreeFam
FBgn0086895	36561	FBgn0086895	pea	Human	1659	2749	DHX8	14	13.75	high	Yes	Yes	Compara, eggNOG, Hieranoid, Inparanoid, Isobase, OMA, OrthoDB, OrthoFinder, OrthoInspector, orthoMCL, Panther, Phylome, RoundUp, TreeFam
FBgn0087013	40581	FBgn0087013	Karybeta3	Human	3843	6402	IPO5	14	13.74	high	Yes	Yes	Compara, eggNOG, Hieranoid, Homologene, Inparanoid, Isobase, OMA, OrthoFinder, OrthoInspector, orthoMCL, Panther, Phylome, RoundUp, TreeFam
FBgn0250874	31266	FBgn0250874	ttm50	Human	92609	23656	TIMM50	14	13.74	high	Yes	Yes	Compara, eggNOG, Hieranoid, Homologene, Inparanoid, Isobase, OrthoDB, OrthoFinder, OrthoInspector, orthoMCL, Panther, Phylome, RoundUp, TreeFam
FBgn0259174	39958	FBgn0259174	Nedd4	Human	23327	7728	NEDD4L	14	13.8	high	Yes	Yes	Compara, eggNOG, Hieranoid, Homologene, Inparanoid, OMA, OrthoDB, OrthoFinder, OrthoInspector, orthoMCL, Panther, Phylome, RoundUp, TreeFam
FBgn0260012	36286	FBgn0260012	pds5	Human	23047	20418	PDS5B	14	13.8	high	Yes	Yes	Compara, eggNOG, Hieranoid, Homologene, Inparanoid, OMA, OrthoDB, OrthoFinder, OrthoInspector, orthoMCL, Panther, Phylome, RoundUp, TreeFam
FBgn0262716	38898	FBgn0262716	Arp3	Human	10096	170	ACTR3	14	13.8	high	Yes	Yes	Compara, eggNOG, Hieranoid, Homologene, Inparanoid, OMA, OrthoDB, OrthoFinder, OrthoInspector, orthoMCL, Panther, Phylome, RoundUp, TreeFam
FBgn0263351	42642	FBgn0263351	AP-2mu	Human	1173	564	AP2M1	14	13.8	high	Yes	Yes	Compara, eggNOG, Hieranoid, Homologene, Inparanoid, OMA, OrthoDB, OrthoFinder, OrthoInspector, orthoMCL, Panther, Phylome, RoundUp, TreeFam
FBgn0263603	39764	FBgn0263603	Zn72D	Human	51663	17277	ZFR	14	13.75	high	Yes	Yes	Compara, eggNOG, Hieranoid, Homologene, Inparanoid, Isobase, OMA, OrthoDB, OrthoInspector, orthoMCL, Panther, Phylome, RoundUp, TreeFam
FBgn0263832	38478	FBgn0263832	Rcd5	Human	10445	6960	MCRS1	14	13.8	high	Yes	Yes	Compara, eggNOG, Hieranoid, Homologene, Inparanoid, OMA, OrthoDB, OrthoFinder, OrthoInspector, orthoMCL, Panther, Phylome, RoundUp, TreeFam
FBgn0264855	33211	FBgn0264855	AP-2alpha	Human	161	562	AP2A2	14	13.8	high	Yes	Yes	Compara, eggNOG, Hieranoid, Homologene, Inparanoid, OMA, OrthoDB, OrthoFinder, OrthoInspector, orthoMCL, Panther, Phylome, RoundUp, TreeFam
FBgn0265574	38062	FBgn0265574	Cdc5	Human	988	1743	CDC5L	14	13.8	high	Yes	Yes	Compara, eggNOG, Hieranoid, Homologene, Inparanoid, OMA, OrthoDB, OrthoFinder, OrthoInspector, orthoMCL, Panther, Phylome, RoundUp, TreeFam
FBgn0265935	35596	FBgn0265935	coro	Human	84940	21356	CORO6	14	13.75	moderate	No	Yes	Compara, eggNOG, Hieranoid, Inparanoid, Isobase, OMA, OrthoDB, OrthoFinder, OrthoInspector, orthoMCL, Panther, Phylome, RoundUp, TreeFam
FBgn0266668	43163	FBgn0266668	Exo84	Human	149371	24659	EXOC8	14	13.8	high	Yes	Yes	Compara, eggNOG, Hieranoid, Homologene, Inparanoid, OMA, OrthoDB, OrthoFinder, OrthoInspector, orthoMCL, Panther, Phylome, RoundUp, TreeFam
FBgn0266669	39940	FBgn0266669	Sec3	Human	55763	30380	EXOC1	14	13.8	high	Yes	Yes	Compara, eggNOG, Hieranoid, Homologene, Inparanoid, OMA, OrthoDB, OrthoFinder, OrthoInspector, orthoMCL, Panther, Phylome, RoundUp, TreeFam
FBgn0266670	33563	FBgn0266670	Sec5	Human	55770	24968	EXOC2	14	13.8	high	Yes	Yes	Compara, eggNOG, Hieranoid, Homologene, Inparanoid, OMA, OrthoDB, OrthoFinder, OrthoInspector, orthoMCL, Panther, Phylome, RoundUp, TreeFam
FBgn0266672	40712	FBgn0266672	Sec8	Human	60412	30389	EXOC4	14	13.8	high	Yes	Yes	Compara, eggNOG, Hieranoid, Homologene, Inparanoid, OMA, OrthoDB, OrthoFinder, OrthoInspector, orthoMCL, Panther, Phylome, RoundUp, TreeFam
FBgn0266917	42048	FBgn0266917	CG16941	Human	10291	10765	SF3A1	14	13.8	high	Yes	Yes	Compara, eggNOG, Hieranoid, Homologene, Inparanoid, OMA, OrthoDB, OrthoFinder, OrthoInspector, orthoMCL, Panther, Phylome, RoundUp, TreeFam
FBgn0283469	32777	FBgn0283469	Vps4	Human	27183	13488	VPS4A	14	13.8	high	Yes	Yes	Compara, eggNOG, Hieranoid, Homologene, Inparanoid, OMA, OrthoDB, OrthoFinder, OrthoInspector, orthoMCL, Panther, Phylome, RoundUp, TreeFam
FBgn0000100	40451	FBgn0000100	RpLP0	Human	6175	10371	RPLP0	15	14.75	high	Yes	Yes	Compara, eggNOG, Hieranoid, Homologene, Inparanoid, Isobase, OMA, OrthoDB, OrthoFinder, OrthoInspector, orthoMCL, Panther, Phylome, RoundUp, TreeFam
FBgn0000317	34882	FBgn0000317	ck	Human	4647	7606	MYO7A	15	14.75	high	Yes	Yes	Compara, eggNOG, Hieranoid, Homologene, Inparanoid, Isobase, OMA, OrthoDB, OrthoFinder, OrthoInspector, orthoMCL, Panther, Phylome, RoundUp, TreeFam
FBgn0000709	33110	FBgn0000709	fliI	Human	2314	3750	FLII	15	14.75	high	Yes	Yes	Compara, eggNOG, Hieranoid, Homologene, Inparanoid, Isobase, OMA, OrthoDB, OrthoFinder, OrthoInspector, orthoMCL, Panther, Phylome, RoundUp, TreeFam
FBgn0002121	33156	FBgn0002121	l(2)gl	Human	3996	6628	LLGL1	15	14.75	high	Yes	Yes	Compara, eggNOG, Hieranoid, Homologene, Inparanoid, Isobase, OMA, OrthoDB, OrthoFinder, OrthoInspector, orthoMCL, Panther, Phylome, RoundUp, TreeFam
FBgn0002774	35523	FBgn0002774	mle	Human	1660	2750	DHX9	15	14.75	high	Yes	Yes	Compara, eggNOG, Hieranoid, Homologene, Inparanoid, Isobase, OMA, OrthoDB, OrthoFinder, OrthoInspector, orthoMCL, Panther, Phylome, RoundUp, TreeFam
FBgn0003124	40232	FBgn0003124	polo	Human	5347	9077	PLK1	15	14.75	high	Yes	Yes	Compara, eggNOG, Hieranoid, Homologene, Inparanoid, Isobase, OMA, OrthoDB, OrthoFinder, OrthoInspector, orthoMCL, Panther, Phylome, RoundUp, TreeFam
FBgn0004556	39871	FBgn0004556	Dbp73D	Human	317781	20082	DDX51	15	14.75	high	Yes	Yes	Compara, eggNOG, Hieranoid, Homologene, Inparanoid, Isobase, OMA, OrthoDB, OrthoFinder, OrthoInspector, orthoMCL, Panther, Phylome, RoundUp, TreeFam
FBgn0005632	43749	FBgn0005632	faf	Human	8239	12632	USP9X	15	14.75	high	Yes	Yes	Compara, eggNOG, Hieranoid, Homologene, Inparanoid, Isobase, OMA, OrthoDB, OrthoFinder, OrthoInspector, orthoMCL, Panther, Phylome, RoundUp, TreeFam
FBgn0011230	46243	FBgn0011230	poe	Human	23352	30313	UBR4	15	14.75	high	Yes	Yes	Compara, eggNOG, Hieranoid, Homologene, Inparanoid, Isobase, OMA, OrthoDB, OrthoFinder, OrthoInspector, orthoMCL, Panther, Phylome, RoundUp, TreeFam
FBgn0011570	33346	FBgn0011570	cpb	Human	832	1491	CAPZB	15	14.75	high	Yes	Yes	Compara, eggNOG, Hieranoid, Homologene, Inparanoid, Isobase, OMA, OrthoDB, OrthoFinder, OrthoInspector, orthoMCL, Panther, Phylome, RoundUp, TreeFam
FBgn0014366	40678	FBgn0014366	noi	Human	10946	10767	SF3A3	15	14.75	high	Yes	Yes	Compara, eggNOG, Hieranoid, Homologene, Inparanoid, Isobase, OMA, OrthoDB, OrthoFinder, OrthoInspector, orthoMCL, Panther, Phylome, RoundUp, TreeFam
FBgn0015283	40388	FBgn0015283	Rpn10	Human	5710	9561	PSMD4	15	14.75	high	Yes	Yes	Compara, eggNOG, Hieranoid, Homologene, Inparanoid, Isobase, OMA, OrthoDB, OrthoFinder, OrthoInspector, orthoMCL, Panther, Phylome, RoundUp, TreeFam
FBgn0020369	33105	FBgn0020369	Rpt6	Human	5705	9552	PSMC5	15	14.75	high	Yes	Yes	Compara, eggNOG, Hieranoid, Homologene, Inparanoid, Isobase, OMA, OrthoDB, OrthoFinder, OrthoInspector, orthoMCL, Panther, Phylome, RoundUp, TreeFam
FBgn0021760	43901	FBgn0021760	chb	Human	23332	17088	CLASP1	15	14.75	high	Yes	Yes	Compara, eggNOG, Hieranoid, Homologene, Inparanoid, Isobase, OMA, OrthoDB, OrthoFinder, OrthoInspector, orthoMCL, Panther, Phylome, RoundUp, TreeFam
FBgn0021796	47396	FBgn0021796	Tor	Human	2475	3942	MTOR	15	14.75	high	Yes	Yes	Compara, eggNOG, Hieranoid, Homologene, Inparanoid, Isobase, OMA, OrthoDB, OrthoFinder, OrthoInspector, orthoMCL, Panther, Phylome, RoundUp, TreeFam
FBgn0023175	36018	FBgn0023175	Prosalpha7	Human	5684	9532	PSMA3	15	14.75	high	Yes	Yes	Compara, eggNOG, Hieranoid, Homologene, Inparanoid, Isobase, OMA, OrthoDB, OrthoFinder, OrthoInspector, orthoMCL, Panther, Phylome, RoundUp, TreeFam
FBgn0023506	31780	FBgn0023506	Es2	Human	8220	16817	ESS2	15	14.75	high	Yes	Yes	Compara, eggNOG, Hieranoid, Homologene, Inparanoid, Isobase, OMA, OrthoDB, OrthoFinder, OrthoInspector, orthoMCL, Panther, Phylome, RoundUp, TreeFam
FBgn0026373	34796	FBgn0026373	RpII33	Human	5432	9189	POLR2C	15	14.75	high	Yes	Yes	Compara, eggNOG, Hieranoid, Homologene, Inparanoid, Isobase, OMA, OrthoDB, OrthoFinder, OrthoInspector, orthoMCL, Panther, Phylome, RoundUp, TreeFam
FBgn0026380	41079	FBgn0026380	Prosbeta3	Human	5691	9540	PSMB3	15	14.75	high	Yes	Yes	Compara, eggNOG, Hieranoid, Homologene, Inparanoid, Isobase, OMA, OrthoDB, OrthoFinder, OrthoInspector, orthoMCL, Panther, Phylome, RoundUp, TreeFam
FBgn0028479	34276	FBgn0028479	Mtpalpha	Human	3030	4801	HADHA	15	14.75	high	Yes	Yes	Compara, eggNOG, Hieranoid, Homologene, Inparanoid, Isobase, OMA, OrthoDB, OrthoFinder, OrthoInspector, orthoMCL, Panther, Phylome, RoundUp, TreeFam
FBgn0028686	32047	FBgn0028686	Rpt3	Human	5704	9551	PSMC4	15	14.75	high	Yes	Yes	Compara, eggNOG, Hieranoid, Homologene, Inparanoid, Isobase, OMA, OrthoDB, OrthoFinder, OrthoInspector, orthoMCL, Panther, Phylome, RoundUp, TreeFam
FBgn0028690	40717	FBgn0028690	Rpn5	Human	5718	9557	PSMD12	15	14.75	high	Yes	Yes	Compara, eggNOG, Hieranoid, Homologene, Inparanoid, Isobase, OMA, OrthoDB, OrthoFinder, OrthoInspector, orthoMCL, Panther, Phylome, RoundUp, TreeFam
FBgn0029134	45269	FBgn0029134	Prosbeta5	Human	5693	9542	PSMB5	15	14.75	high	Yes	Yes	Compara, eggNOG, Hieranoid, Homologene, Inparanoid, Isobase, OMA, OrthoDB, OrthoFinder, OrthoInspector, orthoMCL, Panther, Phylome, RoundUp, TreeFam
FBgn0029840	31543	FBgn0029840	raptor	Human	57521	30287	RPTOR	15	14.75	high	Yes	Yes	Compara, eggNOG, Hieranoid, Homologene, Inparanoid, Isobase, OMA, OrthoDB, OrthoFinder, OrthoInspector, orthoMCL, Panther, Phylome, RoundUp, TreeFam
FBgn0030268	32049	FBgn0030268	Klp10A	Human	3796	6318	KIF2A	15	14.75	high	Yes	Yes	Compara, eggNOG, Hieranoid, Homologene, Inparanoid, Isobase, OMA, OrthoDB, OrthoFinder, OrthoInspector, orthoMCL, Panther, Phylome, RoundUp, TreeFam
FBgn0030855	32742	FBgn0030855	CG5800	Human	1662	2735	DDX10	15	14.75	high	Yes	Yes	Compara, eggNOG, Hieranoid, Homologene, Inparanoid, Isobase, OMA, OrthoDB, OrthoFinder, OrthoInspector, orthoMCL, Panther, Phylome, RoundUp, TreeFam
FBgn0031069	32992	FBgn0031069	Pmp70	Human	5825	67	ABCD3	15	14.75	high	Yes	Yes	Compara, eggNOG, Hieranoid, Homologene, Inparanoid, Isobase, OMA, OrthoDB, OrthoFinder, OrthoInspector, orthoMCL, Panther, Phylome, RoundUp, TreeFam
FBgn0031092	33016	FBgn0031092	CG9577	Human	1891	3149	ECH1	15	14.75	high	Yes	Yes	Compara, eggNOG, Hieranoid, Homologene, Inparanoid, Isobase, OMA, OrthoDB, OrthoFinder, OrthoInspector, orthoMCL, Panther, Phylome, RoundUp, TreeFam
FBgn0031631	33680	FBgn0031631	CG3225	Human	60625	15861	DHX35	15	14.75	high	Yes	Yes	Compara, eggNOG, Hieranoid, Homologene, Inparanoid, Isobase, OMA, OrthoDB, OrthoFinder, OrthoInspector, orthoMCL, Panther, Phylome, RoundUp, TreeFam
FBgn0033017	35488	FBgn0033017	CG10465	Human	83892	23236	KCTD10	15	14.75	high	Yes	Yes	Compara, eggNOG, Hieranoid, Homologene, Inparanoid, Isobase, OMA, OrthoDB, OrthoFinder, OrthoInspector, orthoMCL, Panther, Phylome, RoundUp, TreeFam
FBgn0033160	35654	FBgn0033160	Dhx15	Human	1665	2738	DHX15	15	14.75	high	Yes	Yes	Compara, eggNOG, Hieranoid, Homologene, Inparanoid, Isobase, OMA, OrthoDB, OrthoFinder, OrthoInspector, orthoMCL, Panther, Phylome, RoundUp, TreeFam
FBgn0033688	36304	FBgn0033688	Prp8	Human	10594	17340	PRPF8	15	14.75	high	Yes	Yes	Compara, eggNOG, Hieranoid, Homologene, Inparanoid, Isobase, OMA, OrthoDB, OrthoFinder, OrthoInspector, orthoMCL, Panther, Phylome, RoundUp, TreeFam
FBgn0033762	36393	FBgn0033762	ZnT49B	Human	10463	1329	SLC30A9	15	14.75	high	Yes	Yes	Compara, eggNOG, Hieranoid, Homologene, Inparanoid, Isobase, OMA, OrthoDB, OrthoFinder, OrthoInspector, orthoMCL, Panther, Phylome, RoundUp, TreeFam
FBgn0035524	326206	FBgn0035524	CG11583	Human	55299	24170	BRIX1	15	14.75	high	Yes	Yes	Compara, eggNOG, Hieranoid, Homologene, Inparanoid, Isobase, OMA, OrthoDB, OrthoFinder, OrthoInspector, orthoMCL, Panther, Phylome, RoundUp, TreeFam
FBgn0036702	39922	FBgn0036702	CG6512	Human	10939	315	AFG3L2	15	14.75	high	Yes	Yes	Compara, eggNOG, Hieranoid, Homologene, Inparanoid, Isobase, OMA, OrthoDB, OrthoFinder, OrthoInspector, orthoMCL, Panther, Phylome, RoundUp, TreeFam
FBgn0036733	39955	FBgn0036733	U4-U6-60K	Human	9128	17349	PRPF4	15	14.75	high	Yes	Yes	Compara, eggNOG, Hieranoid, Homologene, Inparanoid, Isobase, OMA, OrthoDB, OrthoFinder, OrthoInspector, orthoMCL, Panther, Phylome, RoundUp, TreeFam
FBgn0037220	40529	FBgn0037220	CG14641	Human	55696	25503	RBM22	15	14.75	high	Yes	Yes	Compara, eggNOG, Hieranoid, Homologene, Inparanoid, Isobase, OMA, OrthoDB, OrthoFinder, OrthoInspector, orthoMCL, Panther, Phylome, RoundUp, TreeFam
FBgn0037573	40987	FBgn0037573	eIF4AIII	Human	9775	18683	EIF4A3	15	14.75	high	Yes	Yes	Compara, eggNOG, Hieranoid, Homologene, Inparanoid, Isobase, OMA, OrthoDB, OrthoFinder, OrthoInspector, orthoMCL, Panther, Phylome, RoundUp, TreeFam
FBgn0038320	41861	FBgn0038320	Sra-1	Human	26999	13760	CYFIP2	15	14.75	high	Yes	Yes	Compara, eggNOG, Hieranoid, Homologene, Inparanoid, Isobase, OMA, OrthoDB, OrthoFinder, OrthoInspector, orthoMCL, Panther, Phylome, RoundUp, TreeFam
FBgn0039213	42934	FBgn0039213	atl	Human	64225	24047	ATL2	15	14.75	high	Yes	Yes	Compara, eggNOG, Hieranoid, Homologene, Inparanoid, Isobase, OMA, OrthoDB, OrthoFinder, OrthoInspector, orthoMCL, Panther, Phylome, RoundUp, TreeFam
FBgn0039776	43620	FBgn0039776	PH4alphaEFB	Human	5033	8546	P4HA1	15	14.75	high	Yes	Yes	Compara, eggNOG, Hieranoid, Homologene, Inparanoid, Isobase, OMA, OrthoDB, OrthoFinder, OrthoInspector, orthoMCL, Panther, Phylome, RoundUp, TreeFam
FBgn0039909	43798	FBgn0039909	ND-49	Human	4720	7708	NDUFS2	15	14.75	high	Yes	Yes	Compara, eggNOG, Hieranoid, Homologene, Inparanoid, Isobase, OMA, OrthoDB, OrthoFinder, OrthoInspector, orthoMCL, Panther, Phylome, RoundUp, TreeFam
FBgn0039959	3355040	FBgn0039959	CG17514	Human	10985	4199	GCN1	15	14.75	high	Yes	Yes	Compara, eggNOG, Hieranoid, Homologene, Inparanoid, Isobase, OMA, OrthoDB, OrthoFinder, OrthoInspector, orthoMCL, Panther, Phylome, RoundUp, TreeFam
FBgn0043458	192509	FBgn0043458	CG12084	Human	10444	30960	ZER1	15	14.75	high	Yes	Yes	Compara, eggNOG, Hieranoid, Homologene, Inparanoid, Isobase, OMA, OrthoDB, OrthoFinder, OrthoInspector, orthoMCL, Panther, Phylome, RoundUp, TreeFam
FBgn0044323	34096	FBgn0044323	Cka	Human	29966	15720	STRN3	15	14.75	high	Yes	Yes	Compara, eggNOG, Hieranoid, Homologene, Inparanoid, Isobase, OMA, OrthoDB, OrthoFinder, OrthoInspector, orthoMCL, Panther, Phylome, RoundUp, TreeFam
FBgn0086134	41531	FBgn0086134	Prosalpha2	Human	5683	9531	PSMA2	15	14.75	high	Yes	Yes	Compara, eggNOG, Hieranoid, Homologene, Inparanoid, Isobase, OMA, OrthoDB, OrthoFinder, OrthoInspector, orthoMCL, Panther, Phylome, RoundUp, TreeFam
FBgn0086347	34445	FBgn0086347	Myo31DF	Human	4642	7598	MYO1D	15	14.75	high	Yes	Yes	Compara, eggNOG, Hieranoid, Homologene, Inparanoid, Isobase, OMA, OrthoDB, OrthoFinder, OrthoInspector, orthoMCL, Panther, Phylome, RoundUp, TreeFam
FBgn0086706	39027	FBgn0086706	pix	Human	6059	69	ABCE1	15	14.75	high	Yes	Yes	Compara, eggNOG, Hieranoid, Homologene, Inparanoid, Isobase, OMA, OrthoDB, OrthoFinder, OrthoInspector, orthoMCL, Panther, Phylome, RoundUp, TreeFam
FBgn0263599	39737	FBgn0263599	l(3)72Ab	Human	23020	30859	SNRNP200	15	14.75	high	Yes	Yes	Compara, eggNOG, Hieranoid, Homologene, Inparanoid, Isobase, OMA, OrthoDB, OrthoFinder, OrthoInspector, orthoMCL, Panther, Phylome, RoundUp, TreeFam
FBgn0264492	48448	FBgn0264492	CkIIalpha	Human	1457	2457	CSNK2A1	15	14.75	high	Yes	Yes	Compara, eggNOG, Hieranoid, Homologene, Inparanoid, Isobase, OMA, OrthoDB, OrthoFinder, OrthoInspector, orthoMCL, Panther, Phylome, RoundUp, TreeFam
FBgn0264560	36337	FBgn0264560	garz	Human	8729	4181	GBF1	15	14.75	high	Yes	Yes	Compara, eggNOG, Hieranoid, Homologene, Inparanoid, Isobase, OMA, OrthoDB, OrthoFinder, OrthoInspector, orthoMCL, Panther, Phylome, RoundUp, TreeFam
FBgn0265935	35596	FBgn0265935	coro	Human	23603	2254	CORO1C	15	14.75	high	Yes	Yes	Compara, eggNOG, Hieranoid, Homologene, Inparanoid, Isobase, OMA, OrthoDB, OrthoFinder, OrthoInspector, orthoMCL, Panther, Phylome, RoundUp, TreeFam
FBgn0266581	42595	FBgn0266581	pit	Human	8886	2741	DDX18	15	14.75	high	Yes	Yes	Compara, eggNOG, Hieranoid, Homologene, Inparanoid, Isobase, OMA, OrthoDB, OrthoFinder, OrthoInspector, orthoMCL, Panther, Phylome, RoundUp, TreeFam
FBgn0266717	41260	FBgn0266717	Bruce	Human	57448	13516	BIRC6	15	14.75	high	Yes	Yes	Compara, eggNOG, Hieranoid, Homologene, Inparanoid, Isobase, OMA, OrthoDB, OrthoFinder, OrthoInspector, orthoMCL, Panther, Phylome, RoundUp, TreeFam

## Sheet: C. Human orthologs GO
Category	Term	Collapse	Count	%	PValue	Genes	List Total	Pop Hits	Pop Total	Fold Enrichment	Bonferroni	Benjamini	FDR
GOTERM_BP_DIRECT	GO:0030048~actin filament-based movement	Actin&cytoskeleton organization	4	5.88235	3.62e-05	MYO5A, MYO6, MYO1B, MYO1E	66	17	16792	59.8645	0.0173391	0.00092	0.0518821
GOTERM_MF_DIRECT	GO:0051015~actin filament binding	Actin&cytoskeleton organization	5	7.35294	0.00187081	MYO6, MYO1B, SVIL, MYO1E, MYO1D	68	132	16881	9.40341	0.254718	0.0263726	2.22858
GOTERM_MF_DIRECT	GO:0005524~ATP binding	ATP binding & ATPase activity	15	22.0588	0.00191571	MYO5A, MYO6, MYO1B, MYO1E, MYO1D, CDK9, ABCG2, CSNK2A2, EIF4A3, PSMC5, CSNK2A1, SNRNP200, ABCD3, DHX30, BMPR1A	68	1495	16881	2.4908	0.259963	0.0247759	2.2815
KEGG_PATHWAY	hsa05169:Epstein-Barr virus infection	Bacteria, parasite & virus infection	7	10.2941	0.000456	CSNK2A2, CSNK2A1, PSMC5, NEDD4, PSMD1, PSMD3, PSMD4	38	190	6910	6.69945	0.0212131	0.00712164	0.43237
GOTERM_BP_DIRECT	GO:0002223~stimulatory C-type lectin receptor signaling pathway	Immune response	8	11.7647	1.58e-07	PSMB5, PSMC5, PSMB3, PSMA3, PSMB2, PSMD1, PSMD3, PSMD4	66	105	16792	19.3847	7.62e-05	5.87e-06	0.000226
GOTERM_BP_DIRECT	GO:0002479~antigen processing and presentation of exogenous peptide antigen via MHC class I, TAP-dependent	Immune response	8	11.7647	4.36e-09	PSMB5, PSMC5, PSMB3, PSMA3, PSMB2, PSMD1, PSMD3, PSMD4	66	63	16792	32.3078	2.1e-06	3.51e-07	6.24e-06
GOTERM_BP_DIRECT	GO:0038095~Fc-epsilon receptor signaling pathway	Immune response	8	11.7647	5.54e-06	PSMB5, PSMC5, PSMB3, PSMA3, PSMB2, PSMD1, PSMD3, PSMD4	66	178	16792	11.4348	0.00267334	0.000157	0.00794196
GOTERM_BP_DIRECT	GO:0050852~T cell receptor signaling pathway	Immune response	9	13.2353	9.94e-08	PSMB5, PSMC5, PSMB3, PSMA3, PSMB2, PSMD1, PSMD3, STOML2, PSMD4	66	148	16792	15.4717	4.8e-05	4e-06	0.000142
GOTERM_BP_DIRECT	GO:1901016~regulation of potassium ion transmembrane transporter activity	Ion binding & transport	3	4.41176	0.000219	NEDD4, WWP2, NEDD4L	66	6	16792	127.212	0.100432	0.00459118	0.31353
GOTERM_BP_DIRECT	GO:0000165~MAPK cascade	MAPK cascade	8	11.7647	6.69e-05	PSMB5, PSMC5, PSMB3, PSMA3, PSMB2, PSMD1, PSMD3, PSMD4	66	262	16792	7.76868	0.0317763	0.0016133	0.0957632
GOTERM_MF_DIRECT	GO:0004298~threonine-type endopeptidase activity	Metabolic pathway	4	5.88235	7.55e-05	PSMB5, PSMB3, PSMA3, PSMB2	68	21	16881	47.2857	0.0117862	0.00197408	0.09085
GOTERM_BP_DIRECT	GO:0006521~regulation of cellular amino acid metabolic process	Metabolic pathway	8	11.7647	9.46e-10	PSMB5, PSMC5, PSMB3, PSMA3, PSMB2, PSMD1, PSMD3, PSMD4	66	51	16792	39.9097	4.57e-07	1.14e-07	1.36e-06
GOTERM_MF_DIRECT	GO:0000146~microfilament motor activity	Motor activity	4	5.88235	6.49e-05	MYO5A, MYO1B, MYO1E, MYO1D	68	20	16881	49.65	0.0101396	0.00203619	0.0780976
GOTERM_MF_DIRECT	GO:0003774~motor activity	Motor activity	5	7.35294	0.000136	MYO5A, MYO6, MYO1B, MYO1E, MYO1D	68	66	16881	18.8068	0.0210868	0.00266049	0.163249
GOTERM_BP_DIRECT	GO:0038061~NIK/NF-kappaB signaling	NIK/NF-kappaB signaling	8	11.7647	6.08e-09	PSMB5, PSMC5, PSMB3, PSMA3, PSMB2, PSMD1, PSMD3, PSMD4	66	66	16792	30.8393	2.94e-06	3.67e-07	8.71e-06
GOTERM_MF_DIRECT	GO:0005515~protein binding	Protein transport & modification	56	82.3529	2.74e-07	NCBP1, TSG101, CCNT1, STOML2, SART3, LARP1, GET4, CSNK2A2, RANBP9, TRIM3, BAG6, CSNK2A1, WWP2, WWP1, PSMD3, PSMD4, ITCH, DHX30, IK, MYO6, UBR4, CDK9, IPO9, HERC2, RBBP6, STOM, EIF4A3, SMU1, HUWE1, IPO4, PSMA3, SNRNP200, CAND2, USP9X, SETD1A, PPP6R3, HADHA, LLGL1, PSMB5, PSMB3, PSMB2, ABCD3, NEDD4L, ZC3H14, ZC3H18, MYO1E, RNPS1, MON2, SF3A3, ABCG2, LAMA1, PSMC5, NEDD4, SVIL, SMURF1, BMPR1A	68	8785	16881	1.58247	4.3e-05	4.3e-05	0.00033
GOTERM_MF_DIRECT	GO:0005516~calmodulin binding	Protein transport & modification	6	8.82353	0.000919	MYO5A, MYO6, MYO1B, MYO1E, MYO1D, UBR4	68	189	16881	7.88095	0.134379	0.0159064	1.10019
GOTERM_BP_DIRECT	GO:0000398~mRNA splicing, via spliceosome	RNA binding & splicing (splicesome)	8	11.7647	2.33e-05	NCBP1, EIF4A3, SNRNP200, GPATCH1, RNPS1, SART3, PNN, SF3A3	66	222	16792	9.16844	0.0112003	0.000626	0.0334126
GOTERM_BP_DIRECT	GO:0043488~regulation of mRNA stability	RNA binding & splicing (splicesome)	9	13.2353	5.75e-09	ZC3H14, PSMB5, PSMC5, PSMB3, PSMA3, PSMB2, PSMD1, PSMD3, PSMD4	66	103	16792	22.2312	2.78e-06	3.97e-07	8.24e-06
GOTERM_MF_DIRECT	GO:0044822~poly(A) RNA binding	RNA binding & splicing (splicesome)	17	25	6.3e-06	MYO5A, ZC3H14, NCBP1, ZC3H18, RNPS1, SART3, RBBP6, GCN1, PNN, SF3A3, LARP1, EIF4A3, WDR75, HUWE1, SNRNP200, PSMD4, DHX30	68	1129	16881	3.73804	0.000988	0.00033	0.0075807
GOTERM_BP_DIRECT	GO:1900364~negative regulation of mRNA polyadenylation	RNA binding & splicing (splicesome)	3	4.41176	0.000407	ZC3H14, CCNT1, CDK9	66	8	16792	95.4091	0.178482	0.00815825	0.581607
GOTERM_MF_DIRECT	GO:0070063~RNA polymerase binding	RNA polymerase binding	3	4.41176	0.00157597	STOM, NEDD4, CCNT1	68	15	16881	49.65	0.219346	0.0244582	1.88041
GOTERM_BP_DIRECT	GO:0033209~tumor necrosis factor-mediated signaling pathway	TNF signaling pathway	8	11.7647	3.52e-07	PSMB5, PSMC5, PSMB3, PSMA3, PSMB2, PSMD1, PSMD3, PSMD4	66	118	16792	17.2491	0.00017	1.21e-05	0.000504
GOTERM_BP_DIRECT	GO:0000209~protein polyubiquitination	UB* proteasomal degradation	12	17.6471	1.08e-10	PSMB5, PSMC5, HUWE1, PSMB3, PSMA3, PSMB2, PSMD1, PSMD3, PSMD4, NEDD4L, SMURF1, RBBP6	66	184	16792	16.5929	5.24e-08	5.24e-08	1.55e-07
GOTERM_MF_DIRECT	GO:0004842~ubiquitin-protein transferase activity	UB* proteasomal degradation	11	16.1765	6.39e-07	HECW2, HUWE1, NEDD4, WWP2, WWP1, UBR4, NEDD4L, HERC2, SMURF1, ITCH, RBBP6	68	329	16881	8.30015	0.0001	5.02e-05	0.000769
GOTERM_BP_DIRECT	GO:0006511~ubiquitin-dependent protein catabolic process	UB* proteasomal degradation	6	8.82353	0.000691	BAG6, USP9X, PSMA3, PSMD3, PSMD4, ITCH	66	182	16792	8.38761	0.283861	0.0132665	0.985718
GOTERM_BP_DIRECT	GO:0006513~protein monoubiquitination	UB* proteasomal degradation	4	5.88235	0.000169	HUWE1, TSG101, NEDD4, NEDD4L	66	28	16792	36.3463	0.0784945	0.00370886	0.242244
GOTERM_BP_DIRECT	GO:0016567~protein ubiquitination	UB* proteasomal degradation	9	13.2353	7.04e-05	TRIM3, NEDD4, WWP2, WWP1, CAND2, NEDD4L, HERC2, SMURF1, ITCH	66	359	16792	6.37832	0.0334437	0.00161848	0.100872
GOTERM_MF_DIRECT	GO:0016874~ligase activity	UB* proteasomal degradation	9	13.2353	1.11e-05	HUWE1, NEDD4, WWP2, WWP1, UBR4, NEDD4L, HERC2, SMURF1, RBBP6	68	270	16881	8.275	0.00174638	0.000437	0.0133988
GOTERM_BP_DIRECT	GO:0031145~anaphase-promoting complex-dependent catabolic process	UB* proteasomal degradation	8	11.7647	2.18e-08	PSMB5, PSMC5, PSMB3, PSMA3, PSMB2, PSMD1, PSMD3, PSMD4	66	79	16792	25.7645	1.05e-05	9.55e-07	3.12e-05
GOTERM_BP_DIRECT	GO:0042176~regulation of protein catabolic process	UB* proteasomal degradation	3	4.41176	0.00130293	PSMD1, PSMD3, NEDD4L	66	14	16792	54.5195	0.467263	0.0230533	1.85102
GOTERM_BP_DIRECT	GO:0042787~protein ubiquitination involved in ubiquitin-dependent protein catabolic process	UB* proteasomal degradation	11	16.1765	3.42e-10	HECW2, HUWE1, NEDD4, WWP2, WWP1, UBR4, NEDD4L, HERC2, SMURF1, ITCH, RBBP6	66	153	16792	18.2919	1.65e-07	5.5e-08	4.9e-07
GOTERM_BP_DIRECT	GO:0043161~proteasome-mediated ubiquitin-dependent protein catabolic process	UB* proteasomal degradation	12	17.6471	3.11e-10	PSMB5, PSMC5, WWP2, PSMB3, WWP1, PSMA3, PSMB2, PSMD1, PSMD3, PSMD4, NEDD4L, SMURF1	66	203	16792	15.0399	1.5e-07	7.51e-08	4.46e-07
GOTERM_BP_DIRECT	GO:0051436~negative regulation of ubiquitin-protein ligase activity involved in mitotic cell cycle	UB* proteasomal degradation	8	11.7647	1.02e-08	PSMB5, PSMC5, PSMB3, PSMA3, PSMB2, PSMD1, PSMD3, PSMD4	66	71	16792	28.6675	4.94e-06	5.49e-07	1.47e-05
GOTERM_BP_DIRECT	GO:0051437~positive regulation of ubiquitin-protein ligase activity involved in regulation of mitotic cell cycle transition	UB* proteasomal degradation	8	11.7647	1.66e-08	PSMB5, PSMC5, PSMB3, PSMA3, PSMB2, PSMD1, PSMD3, PSMD4	66	76	16792	26.7815	8e-06	8e-07	2.37e-05
GOTERM_BP_DIRECT	GO:0051603~proteolysis involved in cellular protein catabolic process	UB* proteasomal degradation	4	5.88235	0.000845	PSMB5, PSMB3, PSMA3, PSMB2	66	48	16792	21.202	0.335386	0.0155906	1.20483
GOTERM_MF_DIRECT	GO:0061630~ubiquitin protein ligase activity	UB* proteasomal degradation	7	10.2941	9.71e-05	TRIM3, NEDD4, WWP2, WWP1, SMURF1, ITCH, RBBP6	68	187	16881	9.29278	0.0151358	0.00217641	0.116852
KEGG_PATHWAY	hsa03050:Proteasome	UB* proteasomal degradation	8	11.7647	2.3e-09	PSMB5, PSMC5, PSMB3, PSMA3, PSMB2, PSMD1, PSMD3, PSMD4	38	44	6910	33.0622	1.08e-07	1.08e-07	2.19e-06
KEGG_PATHWAY	hsa04120:Ubiquitin mediated proteolysis	UB* proteasomal degradation	8	11.7647	6.47e-06	HUWE1, NEDD4, WWP2, WWP1, NEDD4L, HERC2, SMURF1, ITCH	38	137	6910	10.6185	0.000304	0.000152	0.00614646
GOTERM_BP_DIRECT	GO:0060071~Wnt signaling pathway, planar cell polarity pathway	Wnt signaling	9	13.2353	2.33e-09	PSMB5, PSMC5, PSMB3, PSMA3, PSMB2, PSMD1, PSMD3, PSMD4, SMURF1	66	92	16792	24.8893	1.12e-06	2.25e-07	3.34e-06
GOTERM_BP_DIRECT	GO:0090090~negative regulation of canonical Wnt signaling pathway	Wnt signaling	8	11.7647	3.1e-06	PSMB5, PSMC5, PSMB3, PSMA3, PSMB2, PSMD1, PSMD3, PSMD4	66	163	16792	12.4871	0.00149478	9.35e-05	0.00443815
GOTERM_BP_DIRECT	GO:0090263~positive regulation of canonical Wnt signaling pathway	Wnt signaling	8	11.7647	3.94e-07	PSMB5, PSMC5, PSMB3, PSMA3, PSMB2, PSMD1, PSMD3, PSMD4	66	120	16792	16.9616	0.00019	1.27e-05	0.000565

## Sheet: D. Drosophila orthologs GO
Category	Term	Collapse	Count	%	PValue	Annotataion IDs	Genes	Gene symbols	List Total	Pop Hits	Pop Total	Fold Enrichment	Bonferroni	Benjamini	FDR
GOTERM_MF_DIRECT	GO:0005524~ATP binding	ATP binding & ATPase activity	14	22.2222	0.000412	CG11680,CG5179,CG7438,CG12703,CG1891,CG3164,CG5931,CG17520,CG5695,CG7483,CG2146,CG1489,CG7597,CG9155	FBGN0002774, FBGN0019949, FBGN0086347, FBGN0031069, FBGN0003317, FBGN0025683, FBGN0263599, FBGN0264492, FBGN0011225, FBGN0037573, FBGN0261397, FBGN0020369, FBGN0037093, FBGN0010246	mle,Cdk9,Myo31DF,Pmp70,sax,CG3164,l(3)72Ab,CkIIalpha,jar,CG7483,didum,Rpt6,Cdk12,Myo61F	57	751	9284	3.03633	0.0316415	0.0106604	0.435085
GOTERM_MF_DIRECT	GO:0008353~RNA polymerase II carboxy-terminal domain kinase activity	ATP binding & ATPase activity	3	4.7619	0.00155904	CG6292,CG5179,CG7597	FBGN0025455, FBGN0019949, FBGN0037093	CycT,Cdk9,Cdk12	57	10	9284	48.8632	0.114586	0.0150974	1.63687
GOTERM_MF_DIRECT	GO:0042623~ATPase activity, coupled	ATP binding & ATPase activity	4	6.34921	0.0026263	CG7438,CG5695,CG2146,CG9155	FBGN0086347, FBGN0011225, FBGN0261397, FBGN0010246	Myo31DF,jar,didum,Myo61F	57	46	9284	14.1632	0.185451	0.0203031	2.74337
GOTERM_BP_DIRECT	GO:0006974~cellular response to DNA damage stimulus	Cellular response to stress	7	11.1111	1.78e-05	CG11981,CG17331,CG7483,CG11888,CG7619,CG1519,CG1489	FBGN0026380, FBGN0032596, FBGN0037573, FBGN0028692, FBGN0015283, FBGN0023175, FBGN0020369	Prosbeta3,Prosbeta4,CG7483,Rpn2,Rpn10,Prosalpha7,Rpt6	59	105	10996	12.4249	0.00521094	0.00174001	0.023671
GOTERM_MF_DIRECT	GO:0004175~endopeptidase activity	Metabolic pathway	4	6.34921	0.00202026	CG11981,CG17331,CG1519,CG12323	FBGN0026380, FBGN0032596, FBGN0023175, FBGN0029134	Prosbeta3,Prosbeta4,Prosalpha7,Prosbeta5	57	42	9284	15.5121	0.145928	0.0173739	2.11644
GOTERM_MF_DIRECT	GO:0004298~threonine-type endopeptidase activity	Metabolic pathway	4	6.34921	0.000549	CG11981,CG17331,CG1519,CG12323	FBGN0026380, FBGN0032596, FBGN0023175, FBGN0029134	Prosbeta3,Prosbeta4,Prosalpha7,Prosbeta5	57	27	9284	24.13	0.0419105	0.0106464	0.578932
GOTERM_MF_DIRECT	GO:0003774~motor activity	Motor activity	4	6.34921	0.000752	CG7438,CG5695,CG2146,CG9155	FBGN0086347, FBGN0011225, FBGN0261397, FBGN0010246	Myo31DF,jar,didum,Myo61F	57	30	9284	21.717	0.0569887	0.00973183	0.792578
GOTERM_MF_DIRECT	GO:0005515~protein binding	Protein transport & modification	12	19.0476	0.00143507	CG5366,CG9712,CG10719,CG1891,CG4943,CG1945,CG17520,CG5695,CG7483,CG7635,CG42279,CG5965	FBGN0027568, FBGN0036666, FBGN0010300, FBGN0003317, FBGN0029006, FBGN0005632, FBGN0264492, FBGN0011225, FBGN0037573, FBGN0030993, FBGN0259174, FBGN0010328	Cand1,TSG101,brat,sax,Smurf,faf,CkIIalpha,jar,CG7483,Mec2,Nedd4,woc	57	647	9284	3.02091	0.10597	0.0158749	1.5076
GOTERM_BP_DIRECT	GO:0000398~mRNA splicing, via spliceosome	RNA binding & splicing (splicesome)	9	14.2857	2.23e-05	CG8383,CG5451,CG2925,CG18005,CG8833,CG5931,CG7483,CG1677,CG7035	FBGN0037737, FBGN0038666, FBGN0014366, FBGN0037660, FBGN0036386, FBGN0263599, FBGN0037573, FBGN0029941, FBGN0022942	Pnn,Smu1,noi,beag,CG8833,l(3)72Ab,CG7483,CG1677,Cbp80	59	226	10996	7.42193	0.00652088	0.00163422	0.02964
GOTERM_MF_DIRECT	GO:0008536~Ran GTPase binding	Small GTPase binding & regulation	4	6.34921	0.000188	CG5252,CG32165,CG32164,CG42236	FBGN0037894, FBGN0042178, FBGN0042177, FBGN0262114	Ranbp9,CG32165,CG32164,RanBPM	57	19	9284	34.2899	0.0145672	0.00731033	0.198805
KEGG_PATHWAY	dme03050:Proteasome	UB* proteasomal degradation	8	12.6984	2.15e-07	CG11981,CG17331,CG11888,CG7619,CG1519,CG12323,CG1489,CG42641	FBGN0026380, FBGN0032596, FBGN0028692, FBGN0015283, FBGN0023175, FBGN0029134, FBGN0020369, FBGN0261396	Prosbeta3,Prosbeta4,Rpn2,Rpn10,Prosalpha7,Prosbeta5,Rpt6,Rpn3	27	50	2752	16.3081	5.58e-06	5.58e-06	0.000176
GOTERM_MF_DIRECT	GO:0004842~ubiquitin-protein transferase activity	UB* proteasomal degradation	7	11.1111	0.000689	CG8184,CG3231,CG4244,CG42797,CG4943,CG42279,CG11734	FBGN0030674, FBGN0086129, FBGN0003557, FBGN0261931, FBGN0029006, FBGN0259174, FBGN0031107	CG8184,snama,Su(dx),CG42797,Smurf,Nedd4,HERC2	57	179	9284	6.3695	0.0523761	0.0107018	0.72691
GOTERM_MF_DIRECT	GO:0016874~ligase activity	UB* proteasomal degradation	6	9.52381	6.77e-06	CG8184,CG4244,CG42797,CG4943,CG42279,CG11734	FBGN0030674, FBGN0003557, FBGN0261931, FBGN0029006, FBGN0259174, FBGN0031107	CG8184,Su(dx),CG42797,Smurf,Nedd4,HERC2	57	45	9284	21.717	0.000528	0.000528	0.00715645
GOTERM_BP_DIRECT	GO:0042787~protein ubiquitination involved in ubiquitin-dependent protein catabolic process	UB* proteasomal degradation	7	11.1111	4.89e-06	CG8184,CG3231,CG4244,CG42797,CG4943,CG42279,CG11734	FBGN0030674, FBGN0086129, FBGN0003557, FBGN0261931, FBGN0029006, FBGN0259174, FBGN0031107	CG8184,snama,Su(dx),CG42797,Smurf,Nedd4,HERC2	59	84	10996	15.5311	0.00143602	0.000718	0.00651142
GOTERM_BP_DIRECT	GO:0043161~proteasome-mediated ubiquitin-dependent protein catabolic process	UB* proteasomal degradation	8	12.6984	3.57e-07	CG11981,CG17331,CG11888,CG7619,CG1519,CG12323,CG1489,CG42641	FBGN0026380, FBGN0032596, FBGN0028692, FBGN0015283, FBGN0023175, FBGN0029134, FBGN0020369, FBGN0261396	Prosbeta3,Prosbeta4,Rpn2,Rpn10,Prosalpha7,Prosbeta5,Rpt6,Rpn3	59	88	10996	16.943	0.000105	0.000105	0.000475
