# Supplementary material for: Comparative interactome analysis of α-arrestin families in human and Drosophila
Source: eLife. 2024 Jan 25;12:RP88328. doi: 10.7554/eLife.88328 (PMC10945707; doi:10.7554/eLife.88328)
Supplement: Supplementary file 9. — For ATAC-seq, the number of properly paired reads, filtered/deduplicated reads, and identified narrow peaks is summarized. For RNA-seq, the number of filtered and alignable reads is summarized. *Filtered/dedup reads, filtered/deduplicated reads. [file elife-88328-supp9.xlsx]

## Sheet: Sheet1
	ATAC-seq			RNA-seq
Sample	Properly paired reads (%)	Filtered/dedup reads*	Called peaks	Filtered reads (%)	Alignable reads
siCon1	117217586 (97.80%)	17929628	74373	41756384 (99.80%)	37548784
siCon2	203055772 (97.70 %)	31497080	141799	41900786 (-99.40%)	36139515
siTXNIP1	123045656 (97.80%)	20050776	69431	41729984 (99.80%)	37185131
siTXNIP2	179673798 (98%)	25159908	125301	39503312 (99.50%)	33418535
