# Supplementary material for: Comparative interactome analysis of α-arrestin families in human and Drosophila
Source: eLife. 2024 Jan 25;12:RP88328. doi: 10.7554/eLife.88328 (PMC10945707; doi:10.7554/eLife.88328)
Supplement: Supplementary file 10. — Summary of differential accessibility of ACRs (A) and gene expression (B) between control and TXNIP-depleted condition in HeLa cells. [file elife-88328-supp10.xlsx]

## Sheet: A. diffBind results (ATAC-seq)
chr	start	end	width	Conc	Conc_siTXNIP	Conc_siNeg	Fold	p.value	FDR
chr10	103649205	103649605	401	5.87395	3.5752	6.71934	-2.90617	5.40647e-16	3.82486e-11
chr1	48070054	48070454	401	6.0414	3.97385	6.85815	-2.63876	2.70529e-14	9.56944e-10
chr3	177420439	177420839	401	5.63404	3.5587	6.45184	-2.66863	6.78538e-14	1.60013e-09
chr7	32093436	32093836	401	7.23336	5.2315	8.04098	-2.57695	1.69839e-13	2.81048e-09
chr3	147900809	147901209	401	5.82789	3.89277	6.62573	-2.51606	1.98632e-13	2.81048e-09
chr5	178078383	178078783	401	5.16946	2.97409	6.00268	-2.82231	3.08749e-13	3.64046e-09
chr1	96865726	96866126	401	6.50963	4.66684	7.29306	-2.41116	6.5487e-13	6.61849e-09
chr20	40287144	40287544	401	5.80017	3.94827	6.58507	-2.41882	1.28197e-12	9.94871e-09
chr5	32628061	32628461	401	5.8853	4.12693	6.65458	-2.346	1.31819e-12	9.94871e-09
chr7	80563930	80564330	401	5.60994	3.69779	6.4043	-2.48775	1.40626e-12	9.94871e-09
chr5	32785907	32786307	401	5.52074	3.5798	6.31945	-2.5158	2.04525e-12	1.27471e-08
chr7	36303326	36303726	401	6.15225	4.35481	6.9282	-2.34525	2.16218e-12	1.27471e-08
chr1	158146165	158146565	401	5.97997	4.21274	6.75078	-2.31484	4.66049e-12	2.4583e-08
chr11	38019305	38019705	401	6.50679	4.69208	7.28563	-2.34795	4.86475e-12	2.4583e-08
chr5	169648723	169649123	401	5.89915	4.18587	6.66046	-2.26102	9.34287e-12	4.40647e-08
chr2	16425777	16426177	401	5.30596	3.39017	6.10088	-2.49727	1.15801e-11	5.12029e-08
chr3	27623314	27623714	401	6.83526	5.11604	7.59764	-2.25939	1.26166e-11	5.25043e-08
chr1	65514077	65514477	401	4.91678	2.79786	5.74035	-2.7169	2.00612e-11	7.88472e-08
chr1	107702908	107703308	401	4.76388	2.56375	5.59769	-2.80238	2.4817e-11	9.24056e-08
chr1	173190516	173190916	401	5.2554	3.39419	6.0418	-2.44615	2.78675e-11	9.85756e-08
chr14	96095840	96096240	401	5.61718	3.98483	6.36344	-2.19997	4.83151e-11	1.62767e-07
chr4	86032610	86033010	401	4.34382	1.8034	5.21417	-3.13342	5.29652e-11	1.70322e-07
chr7	53315933	53316333	401	5.99324	4.31197	6.74871	-2.18873	5.97651e-11	1.764e-07
chr11	95521105	95521505	401	6.48052	4.89082	7.21843	-2.11797	5.98422e-11	1.764e-07
chr6	47407787	47408187	401	5.2809	3.25327	6.09216	-2.55405	7.73447e-11	2.18873e-07
chr11	10394739	10395139	401	5.1122	3.09499	5.922	-2.568	8.20794e-11	2.23338e-07
chr11	86578073	86578473	401	5.51257	3.74954	6.28266	-2.29665	8.77046e-11	2.29806e-07
chr3	177451870	177452270	401	4.63933	2.57791	5.45525	-2.69863	9.6905e-11	2.39756e-07
chr10	113304697	113305097	401	4.71448	2.45917	5.55488	-2.81808	9.828e-11	2.39756e-07
chr7	36037205	36037605	401	5.682	4.03397	6.43126	-2.17893	1.13009e-10	2.66497e-07
chr2	169046765	169047165	401	5.72019	4.06846	6.47015	-2.17891	1.34682e-10	3.07361e-07
chr12	130128441	130128841	401	5.19614	3.36498	5.97768	-2.38487	1.6286e-10	3.60054e-07
chr1	184624018	184624418	401	5.49205	3.81563	6.24663	-2.21838	1.8331e-10	3.74556e-07
chr1	246583450	246583850	401	5.06945	3.22366	5.85336	-2.41821	1.83407e-10	3.74556e-07
chr8	49065658	49066058	401	6.47186	4.94294	7.19735	-2.04771	1.85303e-10	3.74556e-07
chr4	57490526	57490926	401	4.47342	2.32379	5.30094	-2.77714	1.94999e-10	3.83205e-07
chr6	88730688	88731088	401	5.15015	3.23598	5.94482	-2.45177	2.29405e-10	4.38635e-07
chr6	14271030	14271430	401	6.57484	5.0253	7.30462	-2.06425	2.46732e-10	4.59349e-07
chr9	75451424	75451824	401	4.68127	2.57585	5.50307	-2.67917	2.60448e-10	4.61346e-07
chr2	40299937	40300337	401	4.87175	2.90549	5.67422	-2.5406	2.60847e-10	4.61346e-07
chr7	33494546	33494946	401	4.88501	2.99784	5.6755	-2.47601	3.14561e-10	5.42779e-07
chr1	182869228	182869628	401	5.398	6.0675	4.10987	2.08162	3.60732e-10	6.07627e-07
chr4	89213038	89213438	401	4.20047	1.81537	5.05531	-3.00331	3.82634e-10	6.2953e-07
chr5	164191230	164191630	401	6.13904	4.62115	6.86221	-2.02476	4.08464e-10	6.53063e-07
chr5	34706866	34707266	401	5.41337	3.74122	6.16716	-2.21448	4.15399e-10	6.53063e-07
chr5	29114286	29114686	401	6.72038	5.15084	7.45424	-2.07004	4.91114e-10	7.55312e-07
chr16	56383036	56383436	401	4.99217	3.16645	5.77281	-2.39228	5.2348e-10	7.79511e-07
chr11	93476832	93477232	401	5.5382	3.91664	6.28237	-2.14411	5.28885e-10	7.79511e-07
chr1	193655317	193655717	401	5.52477	3.82789	6.28312	-2.21548	5.41469e-10	7.81771e-07
chr4	123588048	123588448	401	6.10939	4.62445	6.82549	-1.98707	5.73279e-10	8.11144e-07
chr2	191643493	191643893	401	6.06821	4.61926	6.77636	-1.95966	7.30974e-10	1.01399e-06
chr9	86176438	86176838	401	4.45374	2.31087	5.2804	-2.71616	7.76616e-10	1.04294e-06
chr2	18991560	18991960	401	7.13779	5.58106	7.86905	-2.06605	7.81328e-10	1.04294e-06
chr13	23488475	23488875	401	4.90066	2.99352	5.69424	-2.44877	1.05735e-09	1.36816e-06
chr15	58260849	58261249	401	4.77784	2.79665	5.58249	-2.52482	1.06942e-09	1.36816e-06
chrX	152405556	152405956	401	5.27095	3.39879	6.05908	-2.3703	1.08299e-09	1.36816e-06
chr5	160342460	160342860	401	5.07138	3.2661	5.84864	-2.34088	1.25136e-09	1.55314e-06
chr20	40416288	40416688	401	3.93292	1.32004	4.8099	-3.23456	1.29895e-09	1.56234e-06
chr6	108689291	108689691	401	5.3345	3.78855	6.06354	-2.09922	1.30294e-09	1.56234e-06
chr5	35861682	35862082	401	5.82429	4.32271	6.54399	-1.99357	1.35578e-09	1.58089e-06
chr1	184622276	184622676	401	5.01307	3.32961	5.76896	-2.2637	1.36964e-09	1.58089e-06
chr20	8094723	8095123	401	4.38814	2.32569	5.2042	-2.66333	1.38546e-09	1.58089e-06
chr13	59269457	59269857	401	6.28964	4.83352	6.9994	-1.93907	1.54665e-09	1.73681e-06
chrX	11509769	11510169	401	5.59818	4.00211	6.33736	-2.08942	1.60403e-09	1.77311e-06
chr15	91279273	91279673	401	5.4805	3.99571	6.19656	-2.02567	1.65423e-09	1.80046e-06
chr5	14580524	14580924	401	7.09805	5.56182	7.82507	-2.02097	1.74695e-09	1.87257e-06
chr9	116219604	116220004	401	5.84893	4.46703	6.54161	-1.91338	1.88991e-09	1.99558e-06
chr5	159518353	159518753	401	4.82435	2.91655	5.61803	-2.44534	2.09226e-09	2.17675e-06
chr7	33495207	33495607	401	5.43009	3.90293	6.15521	-2.05281	2.22316e-09	2.27942e-06
chr4	118989388	118989788	401	5.1671	3.31293	5.95236	-2.34844	2.42137e-09	2.43041e-06
chr5	35818951	35819351	401	6.20408	4.59844	6.94514	-2.05595	2.43913e-09	2.43041e-06
chr2	191178829	191179229	401	5.65345	4.09981	6.38407	-2.03627	2.48685e-09	2.44354e-06
chr12	75130810	75131210	401	5.3549	3.73751	6.09827	-2.1252	2.59765e-09	2.50585e-06
chr9	68832954	68833354	401	6.15433	4.76526	6.84871	-1.88532	2.63039e-09	2.50585e-06
chr7	50664604	50665004	401	5.21094	3.51041	5.96995	-2.21217	2.65652e-09	2.50585e-06
chr2	9164170	9164570	401	6.20938	4.77776	6.91362	-1.90787	2.90168e-09	2.70109e-06
chr4	45688348	45688748	401	4.9234	3.17761	5.69048	-2.29355	3.30741e-09	3.03878e-06
chr9	83432219	83432619	401	6.28495	4.83388	6.99357	-1.93106	3.46789e-09	3.14537e-06
chr2	219722318	219722718	401	4.67747	2.80199	5.46612	-2.4255	3.76736e-09	3.37374e-06
chr5	44538846	44539246	401	5.41759	3.93753	6.13263	-2.0038	4.0468e-09	3.57868e-06
chr6	92329437	92329837	401	6.07363	4.66571	6.77242	-1.88425	4.09952e-09	3.58055e-06
chr6	152127410	152127810	401	4.24619	2.17159	5.0639	-2.66022	4.98285e-09	4.28148e-06
chr10	53140501	53140901	401	5.10259	3.38693	5.86434	-2.22519	5.02308e-09	4.28148e-06
chr11	106988129	106988529	401	5.76462	4.33827	6.46766	-1.90977	5.49218e-09	4.62559e-06
chr14	77638797	77639197	401	4.08526	1.80963	4.92802	-2.8449	6.51479e-09	5.4223e-06
chr9	70601189	70601589	401	7.1308	5.70356	7.83404	-1.92032	6.64868e-09	5.46939e-06
chr3	102980007	102980407	401	5.29553	3.67621	6.03927	-2.118	6.75768e-09	5.49516e-06
chr17	6506769	6507169	401	4.77729	2.99003	5.55152	-2.32247	6.93672e-09	5.57665e-06
chrX	69025960	69026360	401	5.55399	4.01055	6.28251	-2.01802	7.5238e-09	5.98066e-06
chr13	79750168	79750568	401	6.16325	4.78467	6.85515	-1.84633	7.67751e-09	6.03503e-06
chr14	96104724	96105124	401	6.18313	4.8489	6.86425	-1.81913	7.86106e-09	6.04581e-06
chr11	111327914	111328314	401	5.08661	3.53403	5.81701	-2.10113	7.86214e-09	6.04581e-06
chr7	137667649	137668049	401	6.91709	5.44011	7.63145	-1.93253	8.0514e-09	6.07682e-06
chr18	50284234	50284634	401	5.33423	3.83495	6.05343	-2.00955	8.10617e-09	6.07682e-06
chr1	96416076	96416476	401	6.15309	4.6936	6.8636	-1.91723	8.16015e-09	6.07682e-06
chr7	112488214	112488614	401	5.15694	3.60464	5.88728	-2.07574	8.63931e-09	6.30474e-06
chr1	89975049	89975449	401	6.15119	4.70527	6.85866	-1.89853	8.64444e-09	6.30474e-06
chr8	97835334	97835734	401	4.77938	3.06256	5.54133	-2.26209	8.9371e-09	6.4203e-06
chr3	17372778	17373178	401	4.48883	2.57058	5.28412	-2.45673	9.01283e-09	6.4203e-06
chr5	64688386	64688786	401	4.7344	2.97883	5.5032	-2.29697	9.07514e-09	6.4203e-06
chr11	37987985	37988385	401	5.6826	4.24411	6.3884	-1.91463	9.29011e-09	6.50731e-06
chrX	126509965	126510365	401	5.7173	4.21445	6.43727	-1.96327	9.46398e-09	6.5641e-06
chr6	39296722	39297122	401	5.39417	3.87613	6.11737	-2.0129	9.92042e-09	6.81388e-06
chrX	130100135	130100535	401	4.43136	2.5802	5.21615	-2.426	1.0227e-08	6.9569e-06
chr13	75173974	75174374	401	3.72008	1.00667	4.60568	-3.33093	1.04774e-08	7.05936e-06
chr6	149454411	149454811	401	5.66037	4.30504	6.34667	-1.85492	1.07213e-08	7.15558e-06
chr5	132254542	132254942	401	4.66166	2.99776	5.41391	-2.25722	1.08286e-08	7.15961e-06
chr11	15199615	15200015	401	4.77517	3.17382	5.51539	-2.1878	1.26711e-08	8.30029e-06
chrX	15343003	15343403	401	6.00151	4.62046	6.69399	-1.83575	1.32196e-08	8.58016e-06
chr5	137760818	137761218	401	5.72878	4.34252	6.4225	-1.85816	1.33665e-08	8.59661e-06
chr3	13825035	13825435	401	5.52819	4.05799	6.24106	-1.94855	1.37955e-08	8.79257e-06
chr4	164959885	164960285	401	5.41464	3.88982	6.13927	-2.0016	1.42999e-08	9.0327e-06
chr8	125697334	125697734	401	5.31648	3.84404	6.02985	-1.97637	1.48451e-08	9.29406e-06
chr1	99534501	99534901	401	5.67413	4.33324	6.35691	-1.83229	1.51678e-08	9.37461e-06
chr1	236854680	236855080	401	5.81302	4.34026	6.52646	-1.9228	1.52387e-08	9.37461e-06
chr2	11697415	11697815	401	6.98481	5.56689	7.68592	-1.88286	1.56375e-08	9.53696e-06
chr8	121145489	121145889	401	5.909	4.58253	6.5882	-1.80118	1.65756e-08	1.00227e-05
chr6	77341310	77341710	401	5.61986	4.24458	6.31097	-1.86736	1.69766e-08	1.01782e-05
chr2	40281316	40281716	401	4.29046	2.45574	5.07258	-2.43806	1.76444e-08	1.04897e-05
chr4	121728135	121728535	401	4.86392	2.9924	5.65195	-2.34957	1.78904e-08	1.05473e-05
chr7	37549454	37549854	401	5.1481	3.62334	5.87272	-2.03527	1.84552e-08	1.07514e-05
chr15	63858848	63859248	401	4.1771	2.16274	4.98649	-2.58227	1.85405e-08	1.07514e-05
chr15	71279080	71279480	401	5.07182	3.51733	5.80261	-2.07104	1.88978e-08	1.08694e-05
chr2	9944311	9944711	401	4.50656	2.80823	5.26516	-2.28966	1.97861e-08	1.12886e-05
chr1	182290177	182290577	401	5.82364	4.45107	6.5141	-1.84367	2.04639e-08	1.15819e-05
chr1	231139999	231140399	401	5.37342	3.95595	6.07442	-1.91908	2.16907e-08	1.21788e-05
chr8	78647361	78647761	401	5.14302	3.51924	5.88762	-2.10735	2.22983e-08	1.24214e-05
chr10	52927671	52928071	401	5.97272	4.56401	6.6717	-1.84319	2.26359e-08	1.25109e-05
chr2	204533652	204534052	401	4.35078	2.46662	5.1408	-2.43339	2.32357e-08	1.27429e-05
chr1	209168192	209168592	401	4.78235	3.16898	5.52494	-2.16195	2.35914e-08	1.27509e-05
chr21	17537306	17537706	401	5.10649	3.50053	5.84762	-2.09461	2.36107e-08	1.27509e-05
chr1	235990465	235990865	401	5.05396	3.44804	5.79508	-2.10204	2.505e-08	1.34085e-05
chrX	11470191	11470591	401	6.11427	4.74439	6.80409	-1.80746	2.52411e-08	1.34085e-05
chr16	77764368	77764768	401	4.51138	2.81694	5.26928	-2.27608	2.55275e-08	1.34085e-05
chr2	125696571	125696971	401	6.81094	5.47178	7.49329	-1.80007	2.55865e-08	1.34085e-05
chr10	86649082	86649482	401	6.67933	5.37692	7.35248	-1.77279	2.63693e-08	1.37171e-05
chr7	106421144	106421544	401	4.82919	3.10717	5.59207	-2.22662	2.72383e-08	1.40068e-05
chr6	149169841	149170241	401	5.31399	3.93001	6.00717	-1.90817	2.73223e-08	1.40068e-05
chr3	189268094	189268494	401	5.91477	4.68055	6.57005	-1.73628	2.79754e-08	1.42385e-05
chr11	16195685	16196085	401	4.18461	2.17559	4.99325	-2.55519	2.95787e-08	1.47355e-05
chr5	40333489	40333889	401	4.74733	2.93319	5.52606	-2.30702	2.96226e-08	1.47355e-05
chr4	137993192	137993592	401	5.75878	4.36985	6.45313	-1.84239	2.96714e-08	1.47355e-05
chr9	84947323	84947723	401	5.3833	3.9911	6.07842	-1.88881	2.97852e-08	1.47355e-05
chr1	89605722	89606122	401	6.08064	4.70249	6.77243	-1.81685	3.00812e-08	1.47786e-05
chr8	58529776	58530176	401	5.13742	3.69272	5.84462	-1.96927	3.03852e-08	1.4825e-05
chr7	17689996	17690396	401	5.64154	4.22304	6.34278	-1.86881	3.09081e-08	1.49767e-05
chr1	77412379	77412779	401	6.85006	5.54621	7.52358	-1.77822	3.12275e-08	1.49767e-05
chr3	178382354	178382754	401	4.71294	2.92531	5.48723	-2.28782	3.13311e-08	1.49767e-05
chr17	12730875	12731275	401	5.72485	4.33371	6.41972	-1.84957	3.28904e-08	1.56165e-05
chr5	54643676	54644076	401	4.27887	2.32938	5.07887	-2.47729	3.47115e-08	1.63714e-05
chr3	122978030	122978430	401	6.1098	4.81051	6.78216	-1.74776	3.55866e-08	1.64256e-05
chr14	61588391	61588791	401	4.69025	3.07043	5.43409	-2.16546	3.57901e-08	1.64256e-05
chr1	215475783	215476183	401	5.73027	4.27283	6.44033	-1.89418	3.58474e-08	1.64256e-05
chr13	79989147	79989547	401	4.63544	2.81775	5.41477	-2.31427	3.58972e-08	1.64256e-05
chr6	46011083	46011483	401	4.13228	2.16702	4.9346	-2.53779	3.59875e-08	1.64256e-05
chr5	78504888	78505288	401	4.94169	3.27784	5.69393	-2.15801	3.69214e-08	1.67438e-05
chr6	15504950	15505350	401	4.37294	2.69242	5.12828	-2.28375	4.06067e-08	1.82406e-05
chr7	30914575	30914975	401	5.68497	4.27797	6.38355	-1.85715	4.07407e-08	1.82406e-05
chr20	16580180	16580580	401	5.04858	3.40091	5.79777	-2.12451	4.09954e-08	1.82406e-05
chr7	106568599	106568999	401	5.75209	4.45613	6.42359	-1.76141	4.23738e-08	1.87361e-05
chr4	13640154	13640554	401	6.81406	5.48261	7.49451	-1.77617	4.4123e-08	1.93884e-05
chr4	13892062	13892462	401	5.43259	3.97016	6.14375	-1.91842	4.76587e-08	2.07981e-05
chr12	66824200	66824600	401	5.62843	4.25841	6.31827	-1.82722	4.79192e-08	2.07981e-05
chr5	40477813	40478213	401	5.64935	4.3152	6.33046	-1.79573	4.94937e-08	2.11276e-05
chr4	156575545	156575945	401	4.4507	2.59557	5.23612	-2.3575	4.95354e-08	2.11276e-05
chr9	114779429	114779829	401	5.43612	4.05251	6.12921	-1.86054	4.95743e-08	2.11276e-05
chr11	58866829	58867229	401	4.52497	2.7176	5.30258	-2.31245	4.99744e-08	2.11706e-05
chr7	138752477	138752877	401	6.72902	5.42094	7.40361	-1.76171	5.1495e-08	2.16849e-05
chr16	73255001	73255401	401	4.26116	2.46463	5.03695	-2.36607	5.66534e-08	2.36578e-05
chr5	40497578	40497978	401	4.20797	2.32348	4.99804	-2.43503	5.68487e-08	2.36578e-05
chr1	221040915	221041315	401	4.39591	2.58083	5.1748	-2.33197	5.83752e-08	2.41509e-05
chr5	38466498	38466898	401	6.76056	5.52083	7.41733	-1.7215	5.98392e-08	2.46127e-05
chr5	16886417	16886817	401	6.58346	5.3063	7.25012	-1.72219	6.11449e-08	2.48191e-05
chr1	38138514	38138914	401	4.7295	3.08565	5.47796	-2.15376	6.13758e-08	2.48191e-05
chr6	1809884	1810284	401	5.40411	4.0655	6.08633	-1.82492	6.13934e-08	2.48191e-05
chrX	149454300	149454700	401	5.04804	3.58106	5.76021	-1.97543	6.20982e-08	2.48473e-05
chr3	113536595	113536995	401	5.42203	3.93521	6.13853	-1.9387	6.23986e-08	2.48473e-05
chr5	167993703	167994103	401	5.03899	3.59036	5.74707	-1.96713	6.25168e-08	2.48473e-05
chr3	134094495	134094895	401	5.56694	4.20355	6.25519	-1.81662	6.33304e-08	2.503e-05
chr12	90024308	90024708	401	5.78577	4.51021	6.45202	-1.73162	6.41497e-08	2.5213e-05
chr13	38394789	38395189	401	4.66503	2.97506	5.42211	-2.18987	6.47465e-08	2.53069e-05
chr7	17094903	17095303	401	6.72628	5.43314	7.39707	-1.73675	6.54958e-08	2.54592e-05
chr20	41476104	41476504	401	4.80673	3.21945	5.54416	-2.09382	6.7677e-08	2.60033e-05
chr5	127871727	127872127	401	6.91268	5.65285	7.57479	-1.73319	6.77638e-08	2.60033e-05
chr7	12761126	12761526	401	4.01955	2.00277	4.82929	-2.5878	6.79984e-08	2.60033e-05
chr7	36048105	36048505	401	4.87956	3.31128	5.61317	-2.06793	7.32124e-08	2.78467e-05
chr20	39042481	39042881	401	5.07659	3.53715	5.80428	-2.01897	7.44449e-08	2.80412e-05
chr15	94792176	94792576	401	5.47244	4.12347	6.15719	-1.81656	7.45166e-08	2.80412e-05
chr1	119374281	119374681	401	6.1515	4.85989	6.8219	-1.72265	7.62172e-08	2.85294e-05
chr7	155860893	155861293	401	5.31638	3.93403	6.00918	-1.86752	7.81881e-08	2.91131e-05
chr13	108919372	108919772	401	6.35339	5.11826	7.00892	-1.68457	8.18144e-08	3.01624e-05
chr6	158060785	158061185	401	5.43336	4.06859	6.12195	-1.82909	8.23669e-08	3.01624e-05
chr1	81007041	81007441	401	5.79991	4.51736	6.46797	-1.73496	8.26009e-08	3.01624e-05
chr4	164926333	164926733	401	4.4694	2.68839	5.24257	-2.27708	8.27114e-08	3.01624e-05
chr10	80163747	80164147	401	5.83472	4.52113	6.5107	-1.75046	8.42888e-08	3.058e-05
chr4	99179648	99180048	401	4.0264	1.9957	4.83809	-2.57805	8.5656e-08	3.09174e-05
chr2	127576315	127576715	401	5.7986	4.50136	6.47043	-1.73797	8.6666e-08	3.11232e-05
chr2	202807627	202808027	401	5.06344	3.52689	5.79053	-2.01162	8.97646e-08	3.19362e-05
chr4	28167388	28167788	401	5.91921	4.59269	6.59842	-1.75543	9.01915e-08	3.19362e-05
chr1	241989011	241989411	401	6.34748	5.11107	7.00335	-1.67781	9.07454e-08	3.19362e-05
chr1	75742112	75742512	401	5.45904	4.20977	6.11836	-1.75171	9.10498e-08	3.19362e-05
chr6	150403469	150403869	401	5.45766	4.16302	6.12883	-1.77596	9.11869e-08	3.19362e-05
chr15	87354598	87354998	401	4.11345	2.16449	4.91336	-2.48281	9.47362e-08	3.29231e-05
chr20	10131915	10132315	401	4.97694	3.58521	5.67194	-1.93083	9.49357e-08	3.29231e-05
chr9	84181964	84182364	401	5.2407	3.92111	5.91818	-1.83425	9.7633e-08	3.36934e-05
chr1	201310907	201311307	401	5.31302	3.97337	5.99549	-1.83105	9.81392e-08	3.37037e-05
chr9	107738346	107738746	401	5.70505	4.45411	6.36482	-1.71206	1.00175e-07	3.41256e-05
chr17	27247392	27247792	401	5.2299	3.80604	5.93237	-1.89816	1.00332e-07	3.41256e-05
chr9	79764399	79764799	401	6.57873	5.33056	7.23776	-1.68907	1.01458e-07	3.43433e-05
chr20	444967	445367	401	4.03035	1.99112	4.84322	-2.57096	1.02192e-07	3.44269e-05
chr9	121234371	121234771	401	5.48354	4.10874	6.17453	-1.82351	1.03354e-07	3.46534e-05
chr4	67035485	67035885	401	5.8255	4.48104	6.50915	-1.76686	1.04318e-07	3.48118e-05
chr16	66486714	66487114	401	5.56644	4.22374	6.24965	-1.79219	1.05447e-07	3.50232e-05
chr1	33060724	33061124	401	4.51332	2.90151	5.25559	-2.15234	1.0658e-07	3.50973e-05
chr11	66743303	66743703	401	4.97396	3.51475	5.68441	-1.9636	1.06662e-07	3.50973e-05
chr7	106070110	106070510	401	4.94714	3.52973	5.64812	-1.94674	1.08437e-07	3.55161e-05
chr2	227228091	227228491	401	4.45889	2.90714	5.18912	-2.13872	1.12738e-07	3.67545e-05
chr2	12884861	12885261	401	4.9647	3.43543	5.69027	-2.01993	1.15827e-07	3.75885e-05
chr6	53464839	53465239	401	5.34921	3.97759	6.03944	-1.83402	1.21756e-07	3.93321e-05
chr12	6215974	6216374	401	6.2702	5.04261	6.9237	-1.66121	1.2234e-07	3.93412e-05
chr10	104309953	104310353	401	5.34713	3.96722	6.03934	-1.84393	1.22953e-07	3.93593e-05
chr7	112484639	112485039	401	5.75488	4.51472	6.41177	-1.69056	1.23751e-07	3.94364e-05
chr18	45565587	45565987	401	4.66368	3.08142	5.40011	-2.0949	1.2641e-07	4.00121e-05
chr9	81787848	81788248	401	5.10678	3.60061	5.82746	-1.97342	1.26849e-07	4.00121e-05
chrX	75803503	75803903	401	4.74803	3.0791	5.50122	-2.14218	1.27254e-07	4.00121e-05
chr8	133076214	133076614	401	5.03957	3.51578	5.76399	-1.99293	1.2848e-07	4.02189e-05
chr15	99536693	99537093	401	5.0504	3.62497	5.75323	-1.93087	1.29519e-07	4.02547e-05
chr4	82515701	82516101	401	4.34365	2.58056	5.11375	-2.27457	1.29733e-07	4.02547e-05
chrX	132181372	132181772	401	4.55295	2.90875	5.30148	-2.1549	1.30648e-07	4.03617e-05
chr17	27384285	27384685	401	5.27419	3.83405	5.98036	-1.89956	1.31475e-07	4.04407e-05
chr10	118798242	118798642	401	5.74322	4.49675	6.40179	-1.69388	1.33585e-07	4.09116e-05
chr6	10000448	10000848	401	5.26141	3.92284	5.94361	-1.82719	1.35721e-07	4.10597e-05
chr3	105997860	105998260	401	6.01702	4.68357	6.69796	-1.75179	1.36117e-07	4.10597e-05
chr3	14452963	14453363	401	5.73682	4.46539	6.40198	-1.71429	1.36162e-07	4.10597e-05
chr3	27324645	27325045	401	6.35487	5.09422	7.0172	-1.68513	1.3639e-07	4.10597e-05
chr3	46930910	46931310	401	4.459	2.80783	5.20885	-2.17497	1.41521e-07	4.2424e-05
chr9	37943529	37943929	401	4.16341	2.3289	4.9455	-2.374	1.43003e-07	4.26873e-05
chr1	67646117	67646517	401	6.62541	5.41406	7.27447	-1.66387	1.456e-07	4.31229e-05
chr3	62134133	62134533	401	4.86211	3.38792	5.57587	-1.98316	1.45681e-07	4.31229e-05
chr1	198113320	198113720	401	4.48682	2.87889	5.22833	-2.13579	1.48003e-07	4.35511e-05
chr5	159510309	159510709	401	5.50887	4.26314	6.16725	-1.72456	1.48359e-07	4.35511e-05
chr10	55747273	55747673	401	5.50673	4.24015	6.17063	-1.73332	1.49288e-07	4.36426e-05
chr3	124600848	124601248	401	5.35704	3.95471	6.05454	-1.84817	1.5283e-07	4.44942e-05
chr6	3061529	3061929	401	5.54864	4.27407	6.21462	-1.73119	1.54376e-07	4.47601e-05
chr11	134385800	134386200	401	4.71599	3.24647	5.42871	-2.01007	1.5626e-07	4.51214e-05
chr8	117608960	117609360	401	5.23842	3.80733	5.94254	-1.88902	1.56952e-07	4.51371e-05
chr3	24472353	24472753	401	5.03756	3.51825	5.76103	-1.98373	1.58365e-07	4.53591e-05
chr10	110840550	110840950	401	4.74699	3.22721	5.47056	-2.02722	1.60727e-07	4.57287e-05
chr3	135927154	135927554	401	5.10557	3.70381	5.80293	-1.88807	1.60948e-07	4.57287e-05
chr1	198220464	198220864	401	4.9622	3.44954	5.68425	-1.9877	1.62841e-07	4.60813e-05
chr4	45693807	45694207	401	4.57902	2.93195	5.32809	-2.14706	1.66183e-07	4.68398e-05
chr11	29306530	29306930	401	3.75222	1.58707	4.5817	-2.77799	1.67881e-07	4.69202e-05
chr6	21386765	21387165	401	4.73864	3.14009	5.47831	-2.07835	1.68802e-07	4.69202e-05
chr21	35779707	35780107	401	4.02867	1.99256	4.84111	-2.54305	1.68807e-07	4.69202e-05
chr9	131020321	131020721	401	4.8264	3.17848	5.57564	-2.11047	1.69121e-07	4.69202e-05
chr11	7604572	7604972	401	5.39819	4.11316	6.06689	-1.75639	1.70992e-07	4.7254e-05
chr2	75099834	75100234	401	5.49437	4.20601	6.16393	-1.74175	1.75348e-07	4.82691e-05
chr3	4744498	4744898	401	6.41027	5.11637	7.08125	-1.69781	1.7663e-07	4.84335e-05
chr8	117814945	117815345	401	4.49625	2.80195	5.25412	-2.18161	1.82609e-07	4.98797e-05
chr4	138645317	138645717	401	5.60177	4.32456	6.26844	-1.71815	1.84103e-07	5.00943e-05
chr6	42118491	42118891	401	5.2686	3.97957	5.93833	-1.77859	1.86219e-07	5.0476e-05
chr14	52076317	52076717	401	4.37946	2.7143	5.13195	-2.19225	1.88064e-07	5.07817e-05
chr2	113211279	113211679	401	5.82098	4.57554	6.47928	-1.67671	1.96082e-07	5.27453e-05
chr7	33846179	33846579	401	5.56085	4.32352	6.21697	-1.6982	1.99587e-07	5.34849e-05
chr2	74868002	74868402	401	5.20412	3.85286	5.88943	-1.82779	2.01554e-07	5.38079e-05
chr5	169161184	169161584	401	4.93174	3.53394	5.62817	-1.91222	2.02989e-07	5.39875e-05
chr13	99150985	99151385	401	5.75903	4.43949	6.4365	-1.73391	2.05128e-07	5.43521e-05
chr14	80095645	80096045	401	4.48681	2.79361	5.24448	-2.17448	2.11953e-07	5.59509e-05
chr5	159850115	159850515	401	5.47584	4.13062	6.15968	-1.78814	2.16959e-07	5.68723e-05
chr5	171596478	171596878	401	6.27354	5.05993	6.92321	-1.63642	2.17052e-07	5.68723e-05
chr16	10652968	10653368	401	4.8047	3.38301	5.50667	-1.94565	2.19947e-07	5.74183e-05
chr8	88636574	88636974	401	4.72324	3.15906	5.45601	-2.04911	2.21577e-07	5.75736e-05
chr11	7540876	7541276	401	4.27385	2.57752	5.03209	-2.2272	2.22169e-07	5.75736e-05
chr1	216168494	216168894	401	5.85761	4.62802	6.51164	-1.65809	2.27073e-07	5.86295e-05
chr7	33888195	33888595	401	5.87538	4.67617	6.52107	-1.63438	2.28671e-07	5.88275e-05
chr3	195068228	195068628	401	4.22659	2.46195	4.99696	-2.28269	2.30029e-07	5.89623e-05
chr3	139534913	139535313	401	5.45775	4.19212	6.12139	-1.72394	2.3118e-07	5.90436e-05
chrX	17623725	17624125	401	5.53831	4.3142	6.19085	-1.685	2.4303e-07	6.18467e-05
chr8	125680217	125680617	401	5.43535	4.08649	6.12008	-1.78639	2.5114e-07	6.3625e-05
chr18	44568848	44569248	401	4.78958	3.23768	5.51984	-2.02611	2.51817e-07	6.3625e-05
chr9	27303210	27303610	401	4.70423	3.14862	5.43525	-2.0393	2.52751e-07	6.36339e-05
chrX	66919356	66919756	401	4.50701	2.90778	5.24681	-2.10462	2.57231e-07	6.42682e-05
chr18	44789684	44790084	401	4.24018	2.4457	5.01563	-2.28755	2.57631e-07	6.42682e-05
chr7	134589552	134589952	401	4.64054	3.00425	5.38755	-2.10819	2.57996e-07	6.42682e-05
chr7	95628844	95629244	401	6.11221	4.91187	6.75821	-1.63024	2.60355e-07	6.46284e-05
chr8	126579878	126580278	401	6.45037	5.25645	7.09458	-1.61862	2.61842e-07	6.47701e-05
chr1	84847224	84847624	401	6.7033	5.48813	7.35339	-1.64613	2.66406e-07	6.56695e-05
chr7	85025270	85025670	401	4.9936	3.59221	5.69087	-1.8892	2.70203e-07	6.6318e-05
chr1	110098325	110098725	401	5.57028	4.31907	6.23012	-1.6924	2.71581e-07	6.6318e-05
chr1	175197508	175197908	401	5.30742	3.98437	5.98577	-1.78046	2.71849e-07	6.6318e-05
chr20	40493557	40493957	401	6.06812	4.82502	6.72579	-1.65282	2.73428e-07	6.64739e-05
chr6	46935667	46936067	401	4.76587	3.22128	5.49463	-2.03246	2.81516e-07	6.82058e-05
chr1	108000678	108001078	401	5.92365	4.63697	6.59278	-1.69376	2.83217e-07	6.82258e-05
chr14	80974104	80974504	401	4.11083	2.45873	4.86086	-2.26042	2.83527e-07	6.82258e-05
chr7	137670495	137670895	401	5.53515	4.27254	6.198	-1.70931	2.86604e-07	6.87326e-05
chr7	96314375	96314775	401	6.02082	4.81029	6.66964	-1.62546	2.97743e-07	7.11627e-05
chr4	21181816	21182216	401	4.07368	2.16084	4.86814	-2.41222	3.07221e-07	7.31807e-05
chr2	109213831	109214231	401	6.7422	5.52227	7.3936	-1.6416	3.11221e-07	7.38847e-05
chr1	55262851	55263251	401	4.98469	3.5141	5.69765	-1.93149	3.15208e-07	7.42726e-05
chr16	87518572	87518972	401	4.09497	2.33494	4.86454	-2.31689	3.15556e-07	7.42726e-05
chr8	74250859	74251259	401	5.97991	4.81573	6.6157	-1.59834	3.16005e-07	7.42726e-05
chr7	32076841	32077241	401	5.32023	3.99066	6.00021	-1.77848	3.21618e-07	7.53416e-05
chr15	96428720	96429120	401	6.356	5.1561	7.00188	-1.61457	3.30373e-07	7.71373e-05
chr6	13407799	13408199	401	6.67766	5.46097	7.32818	-1.63561	3.32816e-07	7.7452e-05
chr16	83315260	83315660	401	4.11493	2.31478	4.89133	-2.32129	3.39308e-07	7.85538e-05
chr3	13507738	13508138	401	5.21614	3.937	5.88331	-1.75895	3.39772e-07	7.85538e-05
chr12	24661584	24661984	401	4.2919	2.69447	5.03135	-2.14241	3.53834e-07	8.15385e-05
chr9	102101724	102102124	401	5.06924	3.6398	5.77298	-1.8852	3.59971e-07	8.24878e-05
chr11	45089283	45089683	401	4.20249	2.46735	4.96771	-2.25026	3.60285e-07	8.24878e-05
chr3	129485699	129486099	401	5.00151	3.61584	5.69509	-1.86162	3.62204e-07	8.26356e-05
chr3	192422630	192423030	401	5.97562	4.78173	6.61982	-1.61043	3.63267e-07	8.26356e-05
chr17	73587281	73587681	401	6.56669	5.39667	7.20414	-1.59772	3.70421e-07	8.38583e-05
chr7	19681631	19682031	401	4.12739	2.46088	4.88012	-2.24088	3.71012e-07	8.38583e-05
chr13	85586381	85586781	401	5.91845	4.62411	6.58954	-1.6953	3.76364e-07	8.47971e-05
chr1	77832291	77832691	401	6.18951	5.05605	6.81634	-1.5749	3.78293e-07	8.4961e-05
chr6	127177003	127177403	401	4.29955	2.59011	5.06017	-2.20158	3.80206e-07	8.51203e-05
chr7	11130034	11130434	401	5.442	4.21062	6.09651	-1.68544	3.82935e-07	8.53005e-05
chr5	160287537	160287937	401	5.1284	3.83803	5.79847	-1.77738	3.83422e-07	8.53005e-05
chr1	47809377	47809777	401	5.30034	3.87645	6.00282	-1.85891	3.85471e-07	8.54876e-05
chr6	14093282	14093682	401	4.61382	3.1707	5.32066	-1.97412	3.89598e-07	8.61327e-05
chr2	40316963	40317363	401	5.0852	3.75738	5.76474	-1.80973	3.94251e-07	8.68901e-05
chr13	74135002	74135402	401	5.95466	4.83271	6.57809	-1.56835	3.95857e-07	8.69729e-05
chr5	83568136	83568536	401	5.0915	3.63846	5.80057	-1.89708	4.01383e-07	8.77361e-05
chr2	119240611	119241011	401	4.81124	3.3171	5.52933	-1.96535	4.02329e-07	8.77361e-05
chr6	21483110	21483510	401	5.00409	3.63923	5.6927	-1.84607	4.03051e-07	8.77361e-05
chr1	117210760	117211160	401	4.94239	3.52371	5.64367	-1.89257	4.09021e-07	8.87627e-05
chr5	14901779	14902179	401	6.18159	5.01366	6.81844	-1.59516	4.1172e-07	8.88825e-05
chr4	141350211	141350611	401	4.38566	2.79568	5.12363	-2.10058	4.12086e-07	8.88825e-05
chr3	30357883	30358283	401	5.13354	3.72195	5.83318	-1.86119	4.19372e-07	8.99962e-05
chr8	58527381	58527781	401	4.19217	2.45672	4.95744	-2.24324	4.19794e-07	8.99962e-05
chr17	73562910	73563310	401	4.65449	3.10962	5.3833	-2.02686	4.21643e-07	9.01194e-05
chr14	37623498	37623898	401	4.93355	3.45579	5.64808	-1.93461	4.25112e-07	9.05873e-05
chr20	40668637	40669037	401	4.68918	3.18335	5.40978	-1.99312	4.28278e-07	9.09879e-05
chr1	114083189	114083589	401	4.26628	2.46009	5.0437	-2.26542	4.31773e-07	9.1401e-05
chr5	154517115	154517515	401	4.86619	3.52697	5.54856	-1.8585	4.32807e-07	9.1401e-05
chr5	17326502	17326902	401	4.15297	2.58503	4.88651	-2.176	4.34678e-07	9.1523e-05
chr3	79872424	79872824	401	4.73381	3.17987	5.46449	-2.01736	4.46412e-07	9.36127e-05
chr3	159814231	159814631	401	5.36879	4.14853	6.02028	-1.68538	4.47249e-07	9.36127e-05
chr3	23017784	23018184	401	4.59715	2.98412	5.33966	-2.07073	4.62395e-07	9.64974e-05
chr20	44166418	44166818	401	5.08849	3.74096	5.77289	-1.81323	4.68642e-07	9.74436e-05
chr2	207258504	207258904	401	6.65581	5.45739	7.30127	-1.61008	4.69684e-07	9.74436e-05
chr12	62702571	62702971	401	6.13778	4.98919	6.76905	-1.57139	4.71844e-07	9.76055e-05
chr3	192875896	192876296	401	5.46227	4.22411	6.11862	-1.67978	4.77022e-07	9.83889e-05
chr1	66543442	66543842	401	6.33397	5.17612	6.96793	-1.57453	4.85505e-07	9.98475e-05
chr1	58922274	58922674	401	6.00933	4.90301	6.62806	-1.55178	4.88223e-07	0.000100115
chr8	81539571	81539971	401	5.65125	4.29054	6.33886	-1.76396	4.9423e-07	0.000100804
chr15	87220134	87220534	401	4.43496	2.81721	5.17839	-2.10125	4.94432e-07	0.000100804
chr10	76251988	76252388	401	4.96437	3.58662	5.65606	-1.85352	5.04551e-07	0.000102572
chr7	138864622	138865022	401	6.28715	5.1385	6.91844	-1.56629	5.07176e-07	0.00010281
chr9	118318758	118319158	401	5.15603	3.83827	5.83306	-1.77798	5.15881e-07	0.000104077
chr11	58845340	58845740	401	4.95472	3.58436	5.64465	-1.84912	5.1637e-07	0.000104077
chr7	80594206	80594606	401	4.38641	2.81391	5.12087	-2.08159	5.25223e-07	0.000105561
chr2	19673335	19673735	401	5.84352	4.67078	6.48175	-1.59902	5.29215e-07	0.000106062
chr11	98828996	98829396	401	5.11282	3.74945	5.80106	-1.81676	5.36496e-07	0.000107217
chr11	96145167	96145567	401	4.26001	2.59292	5.01286	-2.16798	5.55699e-07	0.000110742
chr2	11676058	11676458	401	4.81287	3.347	5.52479	-1.93775	5.61444e-07	0.000111573
chr1	54581600	54582000	401	5.00525	3.68255	5.68352	-1.80384	5.68674e-07	0.000112693
chr8	2025285	2025685	401	4.15002	2.45914	4.90727	-2.21588	5.73174e-07	0.000113268
chr1	209266692	209267092	401	5.67121	4.4893	6.31205	-1.60962	5.77413e-07	0.000113678
chr5	115857952	115858352	401	5.93923	4.74686	6.58301	-1.59639	5.78792e-07	0.000113678
chr2	3105392	3105792	401	5.18845	3.99488	5.83257	-1.69832	5.80073e-07	0.000113678
chr11	86559320	86559720	401	5.71276	4.4248	6.38222	-1.69216	5.85661e-07	0.000114456
chr8	88959727	88960127	401	5.67418	4.39996	6.34008	-1.68101	5.89294e-07	0.000114849
chr7	128383738	128384138	401	6.17676	5.08704	6.79042	-1.53414	5.91422e-07	0.000114947
chr8	133216483	133216883	401	5.76152	4.61152	6.39321	-1.58015	5.93432e-07	0.000115022
chr10	98314553	98314953	401	4.79635	3.33562	5.50713	-1.93176	6.03814e-07	0.000116489
chrX	150475949	150476349	401	4.55617	2.99802	5.28771	-2.03003	6.05859e-07	0.000116489
chr5	87099604	87100004	401	4.20315	2.46722	4.9685	-2.22205	6.05943e-07	0.000116489
chr4	23769943	23770343	401	3.36637	0.577448	4.25802	-3.38285	6.19152e-07	0.000118706
chr17	57422733	57423133	401	4.95458	3.55535	5.65135	-1.85743	6.32563e-07	0.00012095
chr4	138910961	138911361	401	5.42864	4.17771	6.0884	-1.68624	6.43881e-07	0.000122774
chr6	100924546	100924946	401	4.93094	3.62079	5.60605	-1.80558	6.45575e-07	0.000122774
chr4	26022314	26022714	401	4.89437	3.49463	5.59125	-1.8661	6.48417e-07	0.000122984
chr5	13567800	13568200	401	6.80646	5.53958	7.47044	-1.65886	6.52457e-07	0.000123419
chr17	10757031	10757431	401	4.32286	2.80654	5.0457	-2.05677	6.55331e-07	0.000123554
chr18	45715414	45715814	401	3.97916	2.16796	4.75741	-2.34963	6.56664e-07	0.000123554
chr1	197736663	197737063	401	5.06441	3.61659	5.77232	-1.87929	6.58937e-07	0.000123653
chr6	45923798	45924198	401	4.86262	3.41788	5.56983	-1.90906	6.63957e-07	0.000124265
chr10	50470916	50471316	401	4.0724	2.31487	4.84153	-2.27447	6.67409e-07	0.000124582
chr12	71865286	71865686	401	4.47148	2.91207	5.20328	-2.04211	6.70788e-07	0.000124761
chr7	37694167	37694567	401	5.09941	3.85675	5.75697	-1.7346	6.72199e-07	0.000124761
chr3	106184040	106184440	401	4.84748	3.44205	5.54569	-1.87715	6.7448e-07	0.000124761
chr13	76976535	76976935	401	4.09708	2.45111	4.84594	-2.20266	6.7542e-07	0.000124761
chr5	28374430	28374830	401	7.53935	6.28768	8.19931	-1.6776	6.90786e-07	0.000127266
chr8	139879702	139880102	401	4.69123	3.25828	5.39577	-1.92506	6.95217e-07	0.000127436
chr1	77511358	77511758	401	6.49129	5.21234	7.15842	-1.66271	6.95309e-07	0.000127436
chr11	134811778	134812178	401	5.61042	4.37788	6.26526	-1.64669	7.08227e-07	0.000129468
chr4	127410131	127410531	401	4.86493	3.529	5.54648	-1.83264	7.15171e-07	0.000130401
chr13	99812608	99813008	401	4.31253	2.71135	5.05271	-2.10133	7.18828e-07	0.000130731
chr12	58067553	58067953	401	5.54466	4.18477	6.23207	-1.75992	7.24249e-07	0.000131077
chr8	58858359	58858759	401	5.91209	4.73263	6.55224	-1.58216	7.24436e-07	0.000131077
chr4	88803603	88804003	401	3.93249	1.99794	4.73025	-2.44031	7.27319e-07	0.000131263
chr4	57102017	57102417	401	4.86706	3.51369	5.55289	-1.83854	7.2967e-07	0.000131352
chr1	174795763	174796163	401	4.68114	3.23781	5.38803	-1.92625	7.39915e-07	0.000132858
chr3	15293048	15293448	401	5.99109	4.85175	6.61966	-1.55058	7.41958e-07	0.000132887
chr1	241583054	241583454	401	5.25497	4.01356	5.91219	-1.70197	7.45906e-07	0.000133149
chr9	120935348	120935748	401	5.01035	3.61586	5.706	-1.84041	7.47716e-07	0.000133149
chr6	112037765	112038165	401	4.57265	3.08417	5.28953	-1.97326	7.49063e-07	0.000133149
chr7	107595223	107595623	401	5.26809	3.90507	5.95626	-1.78635	7.52134e-07	0.00013336
chr8	37691326	37691726	401	5.49167	4.24232	6.15101	-1.66807	7.614e-07	0.000134665
chr4	94532323	94532723	401	5.45474	4.25366	6.10095	-1.64186	7.78305e-07	0.00013719
chrX	7117631	7118031	401	3.7326	1.80453	4.52938	-2.54417	7.79556e-07	0.00013719
chr10	83673290	83673690	401	5.8825	4.71126	6.5203	-1.57748	7.85671e-07	0.000137923
chr8	65965308	65965708	401	4.10745	2.46046	4.8565	-2.19011	7.96047e-07	0.000139399
chr2	23213217	23213617	401	5.74868	4.62204	6.37351	-1.56016	8.00559e-07	0.000139843
chr12	80143442	80143842	401	6.02895	4.89265	6.65663	-1.54513	8.07567e-07	0.000140616
chr17	21410922	21411322	401	4.38649	2.79314	5.12513	-2.06729	8.08958e-07	0.000140616
chr8	13246734	13247134	401	5.36971	4.04611	6.0482	-1.73801	8.15341e-07	0.000141378
chr21	29378855	29379255	401	4.86585	3.5148	5.55111	-1.83158	8.34571e-07	0.000144358
chr11	113014363	113014763	401	4.32481	2.80448	5.04849	-2.04197	8.45241e-07	0.000145847
chr20	13231360	13231760	401	5.40539	4.15264	6.06563	-1.67925	8.48616e-07	0.000146073
chr5	169668711	169669111	401	5.79344	4.63333	6.42806	-1.57652	8.5445e-07	0.000146327
chr8	133575363	133575763	401	6.72569	5.52777	7.37102	-1.60567	8.55359e-07	0.000146327
chr1	159229881	159230281	401	5.19125	3.85607	5.87261	-1.76992	8.56294e-07	0.000146327
chr15	91456220	91456620	401	5.74867	4.53249	6.39905	-1.61901	8.62724e-07	0.000147071
chr11	87901320	87901720	401	4.67987	3.31505	5.36847	-1.87488	8.73087e-07	0.000148479
chr1	201597718	201598118	401	5.81242	4.73806	6.42134	-1.52219	8.8373e-07	0.000149905
chr7	54179215	54179615	401	5.92064	4.67713	6.57843	-1.63422	8.85706e-07	0.000149905
chr15	90315615	90316015	401	4.46085	2.99855	5.17198	-1.97288	8.9545e-07	0.000151192
chr14	80157586	80157986	401	4.86066	3.52065	5.54321	-1.82347	9.0015e-07	0.000151399
chr12	32917244	32917644	401	5.05099	3.74711	5.72451	-1.76621	9.00956e-07	0.000151399
chr7	81638188	81638588	401	5.15896	3.88362	5.82515	-1.7279	9.06084e-07	0.0001519
chr8	32429978	32430378	401	4.5399	3.08664	5.24902	-1.94981	9.10608e-07	0.000152298
chr1	235908801	235909201	401	5.11662	3.83609	5.78416	-1.73784	9.18548e-07	0.000153263
chr3	161415873	161416273	401	6.8673	5.7205	7.49806	-1.56623	9.23838e-07	0.000153783
chr8	130364649	130365049	401	4.9345	3.58041	5.6205	-1.81756	9.34215e-07	0.000155146
chr1	184838654	184839054	401	6.49187	5.32969	7.12708	-1.55841	9.37203e-07	0.000155277
chr10	125123658	125124058	401	6.36316	5.25406	6.98273	-1.52463	9.41645e-07	0.000155649
chr3	167814455	167814855	401	5.53442	4.33301	6.18072	-1.62222	9.47398e-07	0.000156235
chr1	175169235	175169635	401	6.06347	4.87062	6.70738	-1.58232	9.54044e-07	0.000156965
chr21	8993732	8994132	401	4.09129	4.73514	2.89866	2.06614	9.59855e-07	0.000157378
chr6	12472698	12473098	401	4.49776	3.01161	5.21412	-1.97686	9.61003e-07	0.000157378
chr5	141910303	141910703	401	4.80436	3.30848	5.52282	-1.93429	9.7693e-07	0.000159616
chr9	109316270	109316670	401	5.26193	4.0508	5.91092	-1.66642	9.84095e-07	0.000160416
chr13	79767101	79767501	401	5.40363	4.15478	6.06283	-1.67153	1.00038e-06	0.000162696
chr13	63435708	63436108	401	6.61182	5.47322	7.24018	-1.55082	1.01318e-06	0.000164401
chr2	212905575	212905975	401	4.99573	3.63481	5.68339	-1.8091	1.0184e-06	0.000164695
chrX	37317730	37318130	401	5.68398	4.50058	6.32523	-1.59	1.01965e-06	0.000164695
chr13	95570008	95570408	401	4.39369	2.99953	5.08927	-1.95554	1.0243e-06	0.000165068
chr12	13222121	13222521	401	5.11231	3.90353	5.76066	-1.69331	1.04677e-06	0.000168009
chr5	160231030	160231430	401	5.05159	3.75436	5.72342	-1.76927	1.04729e-06	0.000168009
chr4	111960165	111960565	401	5.5365	4.40324	6.16327	-1.57464	1.05362e-06	0.000168328
chr12	41743860	41744260	401	4.49501	3.09756	5.19136	-1.92845	1.05404e-06	0.000168328
chr3	194364953	194365353	401	6.05974	4.93204	6.68487	-1.53263	1.07235e-06	0.000170506
chr3	110527229	110527629	401	5.46857	4.09825	6.1585	-1.76578	1.0725e-06	0.000170506
chr1	87754160	87754560	401	5.08314	3.77363	5.75809	-1.76149	1.08047e-06	0.000171387
chr12	25829241	25829641	401	4.9356	3.54797	5.62964	-1.83149	1.08608e-06	0.000171892
chr2	15195816	15196216	401	4.94255	3.58492	5.62941	-1.81323	1.09058e-06	0.00017222
chr1	70038000	70038400	401	5.81111	4.68039	6.43714	-1.55076	1.09708e-06	0.000172715
chr2	36381004	36381404	401	6.06029	4.98818	6.66851	-1.49878	1.09957e-06	0.000172715
chr7	10483637	10484037	401	4.20487	2.59023	4.9477	-2.11637	1.10104e-06	0.000172715
chr5	174355238	174355638	401	4.92802	3.52715	5.62518	-1.84597	1.10794e-06	0.000173412
chr10	4947638	4948038	401	4.49161	3.0003	5.20909	-1.97084	1.11771e-06	0.000174195
chr8	80341163	80341563	401	5.0001	3.58483	5.70059	-1.84714	1.11787e-06	0.000174195
chr4	103011615	103012015	401	5.42282	4.23124	6.06638	-1.62428	1.13308e-06	0.000175828
chr15	101613419	101613819	401	4.27884	2.81199	4.99097	-2.0167	1.13567e-06	0.000175828
chr3	45178210	45178610	401	5.3435	4.10118	6.00096	-1.66945	1.1358e-06	0.000175828
chr15	69578796	69579196	401	4.78102	3.40792	5.47161	-1.8501	1.15997e-06	0.000179177
chrX	16838208	16838608	401	4.64298	3.21426	5.34656	-1.89916	1.17011e-06	0.00018035
chr3	176948176	176948576	401	4.92746	3.57425	5.61325	-1.808	1.18187e-06	0.000181767
chr12	15278961	15279361	401	6.23767	5.08186	6.87104	-1.54469	1.18454e-06	0.000181783
chr6	64000732	64001132	401	5.20702	3.95461	5.86717	-1.69359	1.19117e-06	0.000182404
chr3	99674189	99674589	401	4.41361	2.90186	5.13548	-1.99388	1.20389e-06	0.000183953
chr6	125659001	125659401	401	4.9935	3.69477	5.66572	-1.76066	1.22016e-06	0.000185597
chr3	136994869	136995269	401	4.62342	3.19401	5.32716	-1.91147	1.22085e-06	0.000185597
chr15	91282011	91282411	401	4.12902	2.58515	4.85762	-2.10282	1.22252e-06	0.000185597
chr5	170522291	170522691	401	5.02951	3.81066	5.68062	-1.70965	1.23136e-06	0.000186407
chr2	66237126	66237526	401	4.9354	3.54846	5.62928	-1.83401	1.23312e-06	0.000186407
chr2	118123808	118124208	401	6.9067	5.75825	7.53793	-1.55799	1.24246e-06	0.000187267
chr3	187640540	187640940	401	4.13104	2.45734	4.88512	-2.16709	1.24411e-06	0.000187267
chr3	174949511	174949911	401	6.28151	5.16996	6.90182	-1.51318	1.25664e-06	0.000188753
chr10	50511832	50512232	401	5.91372	4.73615	6.55333	-1.56628	1.28083e-06	0.000191977
chr7	4665745	4666145	401	3.75885	1.80334	4.55974	-2.50708	1.32158e-06	0.000197395
chr13	85503727	85504127	401	5.27523	3.90819	5.96436	-1.77373	1.32255e-06	0.000197395
chr4	86977606	86978006	401	4.88501	3.59509	5.55497	-1.7741	1.34235e-06	0.000199928
chr5	149062629	149063029	401	6.40794	5.31278	7.02327	-1.50453	1.3507e-06	0.000200659
chr2	1600619	1601019	401	4.72131	3.3132	5.42014	-1.87081	1.35293e-06	0.000200659
chr5	111931085	111931485	401	4.93448	3.48724	5.64225	-1.87662	1.36502e-06	0.000202029
chr2	23524308	23524708	401	5.09865	3.87228	5.75181	-1.69061	1.38017e-06	0.000203207
chr6	144278650	144279050	401	3.99516	2.32643	4.74831	-2.21766	1.38209e-06	0.000203207
chr21	26140095	26140495	401	4.8787	3.64624	5.53351	-1.74503	1.38356e-06	0.000203207
chr10	109903473	109903873	401	4.71829	3.37336	5.40205	-1.83067	1.38625e-06	0.000203207
chr20	17928063	17928463	401	3.99214	2.17958	4.77061	-2.30099	1.38735e-06	0.000203207
chr5	91296611	91297011	401	5.04373	3.82818	5.69393	-1.69616	1.39532e-06	0.000203833
chr8	122694010	122694410	401	5.92274	4.80207	6.54579	-1.52303	1.39738e-06	0.000203833
chr3	129587697	129588097	401	5.25431	4.08082	5.89276	-1.63281	1.40217e-06	0.000204111
chr5	71695571	71695971	401	4.12272	2.46711	4.87341	-2.15451	1.40623e-06	0.000204281
chr3	100521463	100521863	401	5.12893	3.89546	5.78401	-1.68943	1.41922e-06	0.00020565
chr4	48127824	48128224	401	5.87589	4.72973	6.50646	-1.5408	1.42146e-06	0.00020565
chr20	13284975	13285375	401	4.29591	2.79619	5.0152	-2.00572	1.46487e-06	0.000211071
chr3	152021916	152022316	401	5.35302	4.16465	5.99568	-1.62386	1.4649e-06	0.000211071
chr11	125300779	125301179	401	5.4595	4.23227	6.11289	-1.6398	1.48918e-06	0.000214133
chr5	15116952	15117352	401	6.91385	5.76844	7.54419	-1.54834	1.49832e-06	0.00021501
chr2	166074264	166074664	401	5.39591	4.19352	6.04248	-1.62524	1.51106e-06	0.0002164
chr6	6570931	6571331	401	4.44042	2.98388	5.15027	-1.94256	1.51491e-06	0.000216513
chr11	123438090	123438490	401	4.5541	3.15353	5.25118	-1.88814	1.5238e-06	0.000217345
chr2	220225157	220225557	401	5.68464	4.5195	6.3207	-1.56356	1.53512e-06	0.000218518
chr1	107691533	107691933	401	5.84104	4.73598	6.45938	-1.51227	1.56145e-06	0.00022182
chr3	161412068	161412468	401	5.84989	4.62713	6.50207	-1.60335	1.56958e-06	0.000222411
chr1	12539993	12540393	401	6.51412	5.46044	7.11655	-1.48682	1.5719e-06	0.000222411
chr8	122601644	122602044	401	5.7779	4.55708	6.42954	-1.61063	1.57514e-06	0.000222426
chr6	52504143	52504543	401	8.00318	6.77087	8.65794	-1.68077	1.58279e-06	0.00022306
chr9	15157443	15157843	401	5.41018	4.2397	6.04776	-1.60605	1.58816e-06	0.000223371
chr1	167661538	167661938	401	4.7638	3.45015	5.4398	-1.79847	1.61032e-06	0.000225893
chr1	212469977	212470377	401	5.78862	4.71976	6.39582	-1.49518	1.61296e-06	0.000225893
chr7	96303687	96304087	401	4.0172	2.32759	4.77421	-2.20789	1.61862e-06	0.000225893
chr5	40411110	40411510	401	4.79897	3.46898	5.47906	-1.80421	1.6215e-06	0.000225893
chr2	60409190	60409590	401	4.20649	2.68358	4.93072	-2.03971	1.62205e-06	0.000225893
chr13	108902701	108903101	401	5.00875	3.70357	5.68261	-1.75213	1.62595e-06	0.000225991
chr8	94967975	94968375	401	3.80436	2.00248	4.58106	-2.37841	1.64947e-06	0.000228811
chrX	65706396	65706796	401	6.45252	5.39079	7.05748	-1.48253	1.65755e-06	0.000229075
chr11	113190203	113190603	401	4.8615	3.43764	5.56396	-1.85388	1.65785e-06	0.000229075
chr5	143432646	143433046	401	4.53456	3.09304	5.24105	-1.91404	1.67922e-06	0.000231576
chr12	130204448	130204848	401	5.37836	4.12893	6.03772	-1.6571	1.68454e-06	0.000231857
chr5	164188668	164189068	401	6.33753	5.25391	6.94932	-1.48425	1.71495e-06	0.000235584
chr8	130521092	130521492	401	4.50674	3.17063	5.18833	-1.86536	1.73247e-06	0.000237206
chr6	64778004	64778404	401	4.02371	2.32038	4.78322	-2.20672	1.73532e-06	0.000237206
chr4	163063888	163064288	401	4.19225	2.58199	4.93423	-2.08984	1.73681e-06	0.000237206
chr6	74254250	74254650	401	4.30305	2.7014	5.04333	-2.05465	1.74425e-06	0.000237763
chr1	206890263	206890663	401	4.88876	3.53143	5.57554	-1.80372	1.74896e-06	0.000237946
chr7	48537556	48537956	401	4.16694	4.80075	3.0096	1.95373	1.75831e-06	0.000238449
chr3	101928903	101929303	401	5.43124	4.1052	6.11034	-1.71838	1.7594e-06	0.000238449
chr6	125045970	125046370	401	5.43379	4.15893	6.09986	-1.67228	1.76607e-06	0.000238896
chr16	73390934	73391334	401	4.88899	3.54634	5.57219	-1.79562	1.77021e-06	0.000238999
chr17	56163132	56163532	401	5.46873	4.27269	6.11354	-1.60646	1.77448e-06	0.000239118
chr2	23135721	23136121	401	5.04873	3.74926	5.72113	-1.73768	1.78221e-06	0.000239704
chr2	181876606	181877006	401	6.56311	5.46499	7.17935	-1.49884	1.79903e-06	0.000241506
chr2	1130937	1131337	401	4.57046	3.16922	5.2677	-1.87859	1.82966e-06	0.000245153
chr3	136984906	136985306	401	4.71879	3.38734	5.39923	-1.81105	1.83698e-06	0.000245606
chr11	91982050	91982450	401	7.15745	5.97607	7.79813	-1.57548	1.83998e-06	0.000245606
chr2	54370722	54371122	401	4.39093	2.90855	5.10648	-1.96045	1.84801e-06	0.000246213
chr2	181977652	181978052	401	5.08604	3.77124	5.76232	-1.74398	1.89844e-06	0.000251966
chr6	16109153	16109553	401	4.36839	2.89429	5.08213	-1.95703	1.89852e-06	0.000251966
chr2	149411099	149411499	401	4.68375	3.23277	5.39236	-1.88953	1.90187e-06	0.000251966
chr6	124882178	124882578	401	4.73847	3.36214	5.42982	-1.82933	1.92599e-06	0.000254685
chr5	115366237	115366637	401	7.10293	5.94944	7.73563	-1.55407	1.93328e-06	0.000255172
chr1	99662545	99662945	401	6.90862	5.78959	7.53118	-1.52429	1.95183e-06	0.00025714
chr5	142874557	142874957	401	4.37945	2.90163	5.09399	-1.95516	1.98849e-06	0.000261483
chr2	46970650	46971050	401	4.97098	3.74979	5.62273	-1.69717	2.00821e-06	0.000263586
chr3	192207261	192207661	401	6.23454	5.16999	6.8404	-1.46693	2.05846e-06	0.000268642
chr11	70159594	70159994	401	4.22717	2.7023	4.95181	-2.02221	2.05855e-06	0.000268642
chr10	114374980	114375380	401	4.54728	3.16075	5.24106	-1.86692	2.06042e-06	0.000268642
chr6	24879319	24879719	401	5.85535	4.71362	6.48462	-1.52807	2.06192e-06	0.000268642
chr1	211236808	211237208	401	4.99228	3.7373	5.65312	-1.70862	2.12313e-06	0.000275991
chr6	28001741	28002141	401	6.22891	5.12882	6.84575	-1.4858	2.12613e-06	0.000275991
chr8	37302533	37302933	401	5.2805	4.06959	5.92943	-1.63466	2.13313e-06	0.000276096
chr15	82832518	82832918	401	4.51511	3.16297	5.20063	-1.85482	2.13474e-06	0.000276096
chr2	23200755	23201155	401	4.98804	3.71366	5.65398	-1.71951	2.14102e-06	0.000276403
chr2	146982505	146982905	401	4.28615	2.80653	5.00109	-1.97696	2.15667e-06	0.000277915
chr10	63712262	63712662	401	5.90014	4.82601	6.50899	-1.47888	2.16777e-06	0.000278839
chr15	30039059	30039459	401	3.46033	1.32157	4.28646	-2.78311	2.17514e-06	0.000279279
chrX	39736174	39736574	401	5.08524	3.82378	5.74779	-1.70088	2.1942e-06	0.000281215
chr1	100622078	100622478	401	6.08321	4.96047	6.70687	-1.50856	2.21934e-06	0.000283923
chr12	112916371	112916771	401	4.37946	2.99618	5.07247	-1.90145	2.23084e-06	0.000284879
chr3	139198931	139199331	401	4.91946	3.55521	5.60793	-1.79832	2.2536e-06	0.000286568
chr19	35319045	35319445	401	6.35978	5.29609	6.96536	-1.46431	2.25438e-06	0.000286568
chr8	88637417	88637817	401	5.20369	3.96896	5.85912	-1.65916	2.25622e-06	0.000286568
chr9	72585689	72586089	401	4.77011	3.44121	5.44991	-1.78826	2.28168e-06	0.000289135
chr18	37419259	37419659	401	4.42375	2.93169	5.1414	-1.95278	2.2846e-06	0.000289135
chr1	118101418	118101818	401	5.82799	4.70742	6.451	-1.51265	2.30133e-06	0.00029051
chr18	77127826	77128226	401	4.04087	2.46273	4.77646	-2.11508	2.30736e-06	0.00029051
chr18	44564850	44565250	401	4.08583	2.46134	4.83057	-2.11961	2.30778e-06	0.00029051
chr11	36455772	36456172	401	5.78459	4.71892	6.39079	-1.477	2.32912e-06	0.000292454
chr21	27047774	27048174	401	6.06575	4.92116	6.69586	-1.51664	2.33484e-06	0.000292454
chr22	30881944	30882344	401	4.40229	2.98923	5.10228	-1.90492	2.33781e-06	0.000292454
chr9	84711941	84712341	401	5.28587	4.04374	5.94328	-1.65497	2.33977e-06	0.000292454
chr17	62650613	62651013	401	4.76722	3.46052	5.44146	-1.7769	2.35403e-06	0.000293507
chr6	104711327	104711727	401	5.87344	4.82178	6.47522	-1.46405	2.35832e-06	0.000293507
chr19	30030185	30030585	401	4.43275	2.99221	5.13901	-1.91259	2.36064e-06	0.000293507
chr17	55344498	55344898	401	4.2262	2.70348	4.95039	-2.01284	2.37749e-06	0.000295084
chr12	33587347	33587747	401	6.64268	5.47714	7.27885	-1.54091	2.38586e-06	0.000295605
chr7	121313484	121313884	401	5.54833	4.4244	6.17234	-1.53705	2.41815e-06	0.000299081
chr3	192907798	192908198	401	5.0004	3.79543	5.64769	-1.67241	2.4382e-06	0.000300609
chr8	37336650	37337050	401	4.14976	2.45941	4.90691	-2.13293	2.44004e-06	0.000300609
chr10	110629873	110630273	401	4.39231	2.83101	5.1245	-1.99825	2.44325e-06	0.000300609
chrX	110755185	110755585	401	3.78648	1.80113	4.59173	-2.47156	2.46642e-06	0.000302933
chrX	132270687	132271087	401	4.58634	3.2293	5.27305	-1.83193	2.48837e-06	0.0003051
chr17	72422828	72423228	401	7.00575	5.91973	7.61828	-1.50446	2.50639e-06	0.000305809
chr5	161944973	161945373	401	5.93338	4.87933	6.53591	-1.46046	2.50711e-06	0.000305809
chr9	79221076	79221476	401	5.50271	4.2436	6.16464	-1.64393	2.50712e-06	0.000305809
chr3	71423310	71423710	401	4.30129	2.81034	5.01869	-1.96999	2.5276e-06	0.000307775
chr3	111619819	111620219	401	3.61386	1.58577	4.42518	-2.59607	2.56383e-06	0.000311651
chr1	198890618	198891018	401	4.52686	3.08319	5.23382	-1.8937	2.57112e-06	0.000312
chr15	84840848	84841248	401	4.1038	2.58918	4.82627	-2.04936	2.59041e-06	0.000313804
chr12	12976398	12976798	401	4.66413	3.25885	5.36231	-1.85152	2.60909e-06	0.000315526
chr6	10202148	10202548	401	6.30037	5.24896	6.90208	-1.44903	2.65607e-06	0.000320523
chr3	184688547	184688947	401	4.70234	3.30091	5.39962	-1.83824	2.65947e-06	0.000320523
chr7	95599091	95599491	401	5.03514	3.76692	5.69947	-1.70466	2.67454e-06	0.000321791
chr7	65804886	65805286	401	4.14947	2.58528	4.88225	-2.05233	2.71261e-06	0.000325817
chr8	58129094	58129494	401	5.06177	3.81288	5.72098	-1.68587	2.72791e-06	0.000327099
chr11	7579297	7579697	401	5.75451	4.66394	6.36844	-1.4896	2.74859e-06	0.000329022
chr10	63682330	63682730	401	4.77617	3.41628	5.46358	-1.80536	2.77278e-06	0.000331357
chr12	13223159	13223559	401	6.09924	4.99649	6.71689	-1.4796	2.77893e-06	0.000331531
chr3	4821335	4821735	401	3.73569	1.79872	4.53381	-2.4579	2.81387e-06	0.000335135
chr15	81338594	81338994	401	5.44814	4.25646	6.09173	-1.58785	2.83557e-06	0.000337152
chr9	114364134	114364534	401	5.03878	3.76236	5.70525	-1.70633	2.88166e-06	0.000342057
chr4	169283001	169283401	401	4.80141	3.34919	5.5103	-1.86801	2.93149e-06	0.000347389
chr8	96146963	96147363	401	4.92167	3.65311	5.58609	-1.71254	2.94079e-06	0.000347413
chr13	83498440	83498840	401	4.30013	2.81182	5.01697	-1.96031	2.94228e-06	0.000347413
chr6	126919921	126920321	401	4.20618	2.58936	4.94944	-2.06101	2.94642e-06	0.000347413
chr5	9348291	9348691	401	7.22072	6.06067	7.85532	-1.54985	2.9637e-06	0.000348868
chr10	18726943	18727343	401	4.62844	3.30671	5.30646	-1.79548	3.00706e-06	0.000353385
chr1	77605198	77605598	401	4.96338	3.75739	5.61095	-1.67191	3.01615e-06	0.000353864
chr11	96037637	96038037	401	6.08835	5.06054	6.68246	-1.43226	3.0312e-06	0.000355042
chr16	65393180	65393580	401	5.02589	3.77455	5.68576	-1.68472	3.04321e-06	0.00035586
chr4	23038682	23039082	401	4.35274	2.91255	5.05892	-1.91859	3.0634e-06	0.00035763
chr2	219707827	219708227	401	4.9115	3.68228	5.56543	-1.69088	3.06954e-06	0.000357755
chr19	6730436	6730836	401	3.64555	4.36105	2.16337	2.31168	3.07481e-06	0.000357781
chr12	130920726	130921126	401	4.54384	3.16424	5.23598	-1.84253	3.1099e-06	0.000361269
chr1	210251241	210251641	401	6.37771	5.36232	6.96777	-1.43001	3.12267e-06	0.000362158
chr6	52566930	52567330	401	6.27637	5.15725	6.89896	-1.49402	3.13678e-06	0.000363199
chr2	226185670	226186070	401	5.31546	4.13789	5.95507	-1.59482	3.16644e-06	0.000366035
chr15	62594060	62594460	401	3.59409	1.57635	4.40396	-2.58455	3.18113e-06	0.000366877
chr15	22238490	22238890	401	6.56211	5.49217	7.16966	-1.45932	3.1841e-06	0.000366877
chrX	67780682	67781082	401	6.71565	5.62188	7.33056	-1.47949	3.20235e-06	0.00036838
chr7	111750189	111750589	401	4.70102	3.32115	5.39322	-1.81784	3.26788e-06	0.000375307
chr3	65685944	65686344	401	3.77702	2.00404	4.54882	-2.32911	3.27568e-06	0.000375593
chr3	166955527	166955927	401	4.97164	3.76111	5.62046	-1.66917	3.29849e-06	0.000377598
chrX	44306324	44306724	401	4.74865	3.4881	5.41097	-1.73403	3.31267e-06	0.000378607
chr3	41159786	41160186	401	4.47843	3.08419	5.17403	-1.85941	3.33993e-06	0.000381108
chr1	198657543	198657943	401	6.38012	5.35861	6.97218	-1.42858	3.34954e-06	0.000381589
chr13	109576313	109576713	401	6.36188	5.28492	6.97161	-1.45759	3.36999e-06	0.000383301
chr6	6629414	6629814	401	5.06468	3.83209	5.71953	-1.66268	3.38219e-06	0.000384071
chr13	85590216	85590616	401	4.94556	3.69671	5.60476	-1.69381	3.39276e-06	0.000384654
chr7	4725333	4725733	401	5.49963	4.39608	6.11753	-1.51477	3.4305e-06	0.00038831
chr7	13742103	13742503	401	6.38802	5.32753	6.9926	-1.44561	3.49029e-06	0.000394447
chr5	53343249	53343649	401	4.66625	3.25641	5.36549	-1.84106	3.49809e-06	0.000394698
chr8	143966621	143967021	401	4.65542	3.32529	5.33554	-1.79038	3.52298e-06	0.000396572
chr2	23434782	23435182	401	5.71889	4.6896	6.31348	-1.45185	3.52931e-06	0.000396572
chr6	15473666	15474066	401	5.9439	4.87245	6.55192	-1.45692	3.53151e-06	0.000396572
chr1	195585144	195585544	401	5.10837	3.85051	5.76997	-1.68072	3.53725e-06	0.000396587
chr1	164735620	164736020	401	5.96023	4.84222	6.58248	-1.49348	3.63455e-06	0.000406852
chr8	117040966	117041366	401	5.40926	4.2239	6.05107	-1.58098	3.66559e-06	0.000409678
chr7	35025869	35026269	401	4.71425	3.45942	5.37505	-1.73586	3.68364e-06	0.000411045
chr11	105357561	105357961	401	4.00034	2.45914	4.7284	-2.08207	3.69428e-06	0.000411445
chr4	142474335	142474735	401	4.61867	3.18482	5.32342	-1.86166	3.70185e-06	0.000411445
chr3	79040724	79041124	401	4.314	2.81771	5.03255	-1.94937	3.70917e-06	0.000411445
chrX	39808413	39808813	401	5.3528	4.18831	5.98868	-1.57602	3.71171e-06	0.000411445
chr1	119674015	119674415	401	5.18405	3.91522	5.84854	-1.67332	3.7163e-06	0.000411445
chr15	78216661	78217061	401	4.00854	2.45111	4.73993	-2.08346	3.72772e-06	0.00041156
chr11	91860596	91860996	401	5.53825	4.41684	6.16151	-1.52017	3.73475e-06	0.00041156
chr3	8658351	8658751	401	5.66701	4.62538	6.26558	-1.45579	3.73479e-06	0.00041156
chr8	33104917	33105317	401	4.09082	2.45508	4.83774	-2.09347	3.7445e-06	0.000411988
chr1	221897445	221897845	401	3.45445	1.3255	4.27932	-2.74013	3.76899e-06	0.000414039
chr12	12009202	12009602	401	5.51001	4.37829	6.13633	-1.52961	3.8006e-06	0.000416864
chr5	147404185	147404585	401	5.65967	4.56245	6.27564	-1.49178	3.83266e-06	0.000419202
chr16	82629677	82630077	401	5.57752	4.46023	6.19956	-1.51069	3.83461e-06	0.000419202
chr9	72586735	72587135	401	4.30395	2.90671	5.00025	-1.89528	3.83969e-06	0.000419202
chr12	105199527	105199927	401	4.17364	2.69641	4.88805	-1.97533	3.84645e-06	0.000419293
chrX	74521952	74522352	401	3.39205	1.32153	4.2092	-2.75134	3.85539e-06	0.00041962
chr1	209398549	209398949	401	5.94217	4.82286	6.5648	-1.4869	3.88586e-06	0.000422287
chrX	34599719	34600119	401	4.33923	2.90764	5.04346	-1.90222	3.89755e-06	0.000422908
chr1	158037720	158038120	401	6.25503	5.16638	6.86837	-1.46102	3.916e-06	0.000423713
chr7	112986256	112986656	401	5.90707	4.80708	6.52389	-1.47592	3.91694e-06	0.000423713
chr1	210477362	210477762	401	4.65617	3.30612	5.34119	-1.79301	4.00744e-06	0.00043284
chr15	70289518	70289918	401	5.36213	4.27035	5.97643	-1.52166	4.04236e-06	0.00043535
chr1	234458584	234458984	401	4.74565	3.51976	5.39868	-1.70952	4.04299e-06	0.00043535
chr2	20421959	20422359	401	4.07772	2.59347	4.79367	-2.0165	4.06136e-06	0.000436664
chr3	114496856	114497256	401	6.26033	5.21743	6.85932	-1.42597	4.10968e-06	0.000441189
chr5	132318720	132319120	401	4.37834	2.90246	5.09247	-1.91511	4.12298e-06	0.000441946
chr2	35298504	35298904	401	6.8937	5.82679	7.5003	-1.46557	4.13438e-06	0.000442497
chr15	101105061	101105461	401	4.12495	2.5901	4.85168	-2.0192	4.16661e-06	0.000445273
chr10	21402680	21403080	401	4.83463	3.61537	5.48585	-1.68374	4.19872e-06	0.000448028
chr2	138395857	138396257	401	4.54675	3.07667	5.2596	-1.88469	4.2163e-06	0.000449227
chr9	77449700	77450100	401	4.20871	2.70136	4.92964	-1.97415	4.25862e-06	0.000453053
chr2	188629289	188629689	401	6.38943	5.38569	6.97564	-1.41122	4.26545e-06	0.000453099
chr11	77131093	77131493	401	5.33992	4.23741	5.9575	-1.52924	4.27384e-06	0.000453309
chr3	20057234	20057634	401	6.04122	4.95196	6.65474	-1.46311	4.2809e-06	0.000453378
chr8	138952913	138953313	401	6.04263	4.99425	6.64337	-1.4301	4.32696e-06	0.000456707
chr10	59991637	59992037	401	4.47801	3.1677	5.15317	-1.80196	4.33101e-06	0.000456707
chr1	61486800	61487200	401	5.84235	4.82141	6.43422	-1.42414	4.33178e-06	0.000456707
chr8	124227587	124227987	401	4.20771	2.80884	4.90439	-1.92014	4.33815e-06	0.000456707
chr1	47758340	47758740	401	5.85701	4.7905	6.46348	-1.44824	4.36137e-06	0.000458469
chr13	101489741	101490141	401	5.30216	4.0923	5.9508	-1.60488	4.43123e-06	0.000465121
chr6	40852941	40853341	401	4.95356	3.7556	5.5989	-1.64993	4.46521e-06	0.000467884
chr2	227267728	227268128	401	5.13061	3.92515	5.77803	-1.62354	4.47078e-06	0.000467884
chr5	162160388	162160788	401	3.97384	2.32603	4.72306	-2.13655	4.5125e-06	0.000471553
chr7	12130675	12131075	401	4.98152	3.67834	5.65487	-1.71295	4.58855e-06	0.000478793
chr8	121164136	121164536	401	5.43316	4.33839	6.04838	-1.50705	4.60913e-06	0.000480232
chr21	38438505	38438905	401	5.15052	3.97311	5.79008	-1.60071	4.61694e-06	0.000480339
chr8	23452560	23452960	401	4.96309	3.59702	5.65199	-1.76162	4.63078e-06	0.00048049
chr1	55827283	55827683	401	4.81704	3.493	5.49564	-1.74642	4.63198e-06	0.00048049
chr4	15723398	15723798	401	4.05151	2.57919	4.76485	-2.0086	4.66098e-06	0.00048279
chr8	37599926	37600326	401	4.87209	3.61022	5.53475	-1.69628	4.69318e-06	0.000485415
chr3	177905880	177906280	401	3.80558	2.00208	4.58254	-2.30525	4.70141e-06	0.000485556
chr2	191050164	191050564	401	5.10017	3.91153	5.7429	-1.61399	4.7132e-06	0.000485792
chr11	101478664	101479064	401	4.98879	3.75475	5.64403	-1.66392	4.71743e-06	0.000485792
chr14	99035936	99036336	401	5.95681	4.91088	6.55676	-1.42791	4.80844e-06	0.000494444
chr1	206501257	206501657	401	4.40151	2.98825	5.10154	-1.86285	4.90291e-06	0.000503427
chr4	15774073	15774473	401	5.27856	4.08401	5.92295	-1.59484	4.92442e-06	0.00050425
chr2	129929660	129930060	401	3.72366	2.00296	4.48631	-2.30246	4.92992e-06	0.00050425
chr5	145961189	145961589	401	4.51238	3.08111	5.21654	-1.85613	4.9323e-06	0.00050425
chr1	201275269	201275669	401	6.57624	5.54676	7.1709	-1.42093	4.95479e-06	0.000505817
chr8	122988818	122989218	401	5.00185	3.75239	5.66122	-1.67008	4.98553e-06	0.000508042
chr3	13533797	13534197	401	4.43594	3.07605	5.12334	-1.82535	4.99094e-06	0.000508042
chr12	11580419	11580819	401	4.73343	3.42028	5.4093	-1.75542	5.00783e-06	0.000509029
chr10	130637136	130637536	401	3.913	2.16212	4.68097	-2.21434	5.12253e-06	0.00051994
chr8	81783621	81784021	401	5.4398	4.23789	6.08624	-1.58873	5.14161e-06	0.000521129
chr13	26022600	26023000	401	5.13146	3.86974	5.79407	-1.66327	5.15235e-06	0.000521471
chr3	8444342	8444742	401	6.27322	5.25831	6.86312	-1.40398	5.18034e-06	0.000523555
chr5	14579609	14580009	401	6.1807	5.12281	6.78445	-1.43473	5.19883e-06	0.000524674
chr6	45626498	45626898	401	4.09894	2.5957	4.81899	-1.99886	5.23622e-06	0.00052759
chr8	139371311	139371711	401	6.72519	5.6663	7.32926	-1.44208	5.24591e-06	0.00052759
chr5	154519353	154519753	401	5.27866	4.11307	5.91486	-1.57045	5.2501e-06	0.00052759
chr11	27201995	27202395	401	5.65174	4.58456	6.25842	-1.45799	5.25821e-06	0.000527656
chr5	68549186	68549586	401	6.12783	5.12554	6.71356	-1.3951	5.28352e-06	0.000529445
chr12	25924673	25925073	401	6.14034	5.06669	6.74904	-1.43676	5.3086e-06	0.000530018
chr20	54149026	54149426	401	5.31556	4.20614	5.93523	-1.52864	5.30928e-06	0.000530018
chr1	147757651	147758051	401	4.88176	3.54238	5.56416	-1.75061	5.31172e-06	0.000530018
chr9	71990489	71990889	401	5.71324	4.65494	6.31713	-1.44541	5.36126e-06	0.000534208
chr8	13270961	13271361	401	5.56641	4.42994	6.19413	-1.51354	5.37055e-06	0.000534381
chr12	58668842	58669242	401	3.99859	2.46086	4.72592	-2.0544	5.39021e-06	0.000535584
chr2	195520653	195521053	401	6.54235	5.46512	7.15217	-1.44675	5.40123e-06	0.000535926
chr2	42008207	42008607	401	5.37974	4.2679	6.00013	-1.51897	5.41645e-06	0.000536684
chr1	153490238	153490638	401	5.30545	4.17127	5.93251	-1.54269	5.44022e-06	0.000537314
chr9	121607887	121608287	401	4.59836	3.3236	5.26439	-1.74689	5.44167e-06	0.000537314
chr18	6561756	6562156	401	4.64535	3.39075	5.30609	-1.72711	5.4456e-06	0.000537314
chr7	110522817	110523217	401	7.02293	5.99631	7.61666	-1.44731	5.47524e-06	0.000539487
chrX	140040386	140040786	401	6.67038	5.6273	7.26942	-1.43038	5.52173e-06	0.000543311
chr2	11370590	11370990	401	5.56574	4.55101	6.15558	-1.4377	5.55931e-06	0.000546248
chr3	133644757	133645157	401	5.41122	4.24611	6.04727	-1.54967	5.57097e-06	0.000546635
chr17	12613614	12614014	401	3.66827	1.81154	4.45394	-2.40201	5.59879e-06	0.000548604
chr14	37573436	37573836	401	3.62168	1.57689	4.43532	-2.54916	5.61062e-06	0.000549003
chr11	130124053	130124453	401	4.6939	3.38272	5.36927	-1.74799	5.63366e-06	0.000550496
chr9	71988161	71988561	401	6.25048	5.21453	6.84723	-1.40823	5.75885e-06	0.000561953
chr2	191593995	191594395	401	5.88209	4.80637	6.49143	-1.44448	5.81151e-06	0.00056631
chr3	105232725	105233125	401	4.31668	2.91325	5.01443	-1.86985	5.84044e-06	0.000567551
chr12	46133865	46134265	401	5.17393	4.05131	5.79755	-1.55646	5.84322e-06	0.000567551
chr6	52551449	52551849	401	4.50689	3.17103	5.18842	-1.79172	5.84832e-06	0.000567551
chr1	211017317	211017717	401	5.34389	4.25942	5.95595	-1.50355	5.86358e-06	0.000568253
chr1	197440764	197441164	401	5.548	4.51325	6.14436	-1.44652	5.93723e-06	0.000574445
chr1	223031722	223032122	401	5.62126	4.59838	6.21377	-1.43075	5.94371e-06	0.000574445
chr20	6164802	6165202	401	4.95309	3.72594	5.60647	-1.65155	6.00165e-06	0.000579254
chr6	7267451	7267851	401	6.22759	5.19751	6.82244	-1.40582	6.01119e-06	0.000579384
chr1	217562300	217562700	401	7.13648	6.02666	7.75627	-1.48504	6.03294e-06	0.000579925
chr1	88488247	88488647	401	5.78868	4.7268	6.3937	-1.44055	6.03583e-06	0.000579925
chr8	80965309	80965709	401	4.71568	3.37129	5.39931	-1.76253	6.0414e-06	0.000579925
chr18	77071853	77072253	401	5.35208	4.22869	5.97594	-1.52959	6.07904e-06	0.000582747
chr10	89262358	89262758	401	5.81864	4.75401	6.42452	-1.43691	6.11586e-06	0.000584857
chr2	23241878	23242278	401	6.02202	4.9696	6.62404	-1.42254	6.11758e-06	0.000584857
chr2	71882918	71883318	401	4.80405	3.52791	5.47044	-1.70783	6.14802e-06	0.000585641
chr1	226005900	226006300	401	5.05829	3.8391	5.70949	-1.63135	6.15768e-06	0.000585641
chr3	55369513	55369913	401	5.22702	4.07708	5.85868	-1.56105	6.1579e-06	0.000585641
chr12	19138490	19138890	401	4.32458	2.92551	5.02131	-1.86498	6.15889e-06	0.000585641
chr5	147898852	147899252	401	4.47291	3.09119	5.16555	-1.82128	6.19401e-06	0.00058819
chr10	52257296	52257696	401	4.92902	3.68699	5.5864	-1.66465	6.24462e-06	0.000592201
chr12	42725761	42726161	401	6.22291	5.15996	6.82826	-1.42377	6.2811e-06	0.000594863
chr1	224565189	224565589	401	6.29555	5.16672	6.92102	-1.48574	6.30739e-06	0.000596555
chr12	62785895	62786295	401	4.59916	3.24894	5.28422	-1.78147	6.35391e-06	0.000600152
chr9	18890336	18890736	401	3.69717	2.00184	4.45523	-2.28535	6.37138e-06	0.000600999
chr5	14944979	14945379	401	3.85585	2.32269	4.58223	-2.11363	6.38064e-06	0.000601071
chr2	179974760	179975160	401	6.46639	5.49154	7.04287	-1.38309	6.4506e-06	0.000606215
chr12	93723204	93723604	401	4.79692	3.50255	5.46803	-1.71562	6.45238e-06	0.000606215
chr7	33868112	33868512	401	5.54866	4.48954	6.15281	-1.45786	6.46292e-06	0.0006064
chr17	14738185	14738585	401	7.23308	6.13528	7.84922	-1.48043	6.47223e-06	0.000606469
chr7	47873705	47874105	401	3.97938	2.31921	4.73093	-2.11679	6.48114e-06	0.000606501
chr4	123750060	123750460	401	4.41291	3.16838	5.07096	-1.76652	6.53308e-06	0.000610554
chr1	63946900	63947300	401	6.8599	5.80902	7.46143	-1.43673	6.63414e-06	0.000619181
chr11	57292888	57293288	401	4.5279	3.22413	5.2014	-1.75935	6.66675e-06	0.000621404
chr17	72456018	72456418	401	4.56891	3.30665	5.23167	-1.73145	6.70078e-06	0.000622789
chr21	41959193	41959593	401	4.15213	2.69769	4.86151	-1.93518	6.70364e-06	0.000622789
chrX	69109674	69110074	401	5.89787	4.85357	6.4973	-1.41848	6.71094e-06	0.000622789
chr11	46920720	46921120	401	4.20947	2.70042	4.93076	-1.94749	6.72223e-06	0.000622789
chr5	107615483	107615883	401	4.11849	2.57193	4.84765	-1.99486	6.72563e-06	0.000622789
chr2	57882203	57882603	401	4.78133	3.45948	5.45938	-1.73732	6.74019e-06	0.000623323
chr2	726162	726562	401	4.61525	3.39183	5.26761	-1.70635	6.74947e-06	0.000623365
chr2	156182135	156182535	401	4.94886	3.80084	5.57997	-1.60167	6.80541e-06	0.000627713
chr3	24011444	24011844	401	5.92783	4.89519	6.52351	-1.4106	6.84796e-06	0.000630815
chr2	125680116	125680516	401	5.24526	4.12044	5.86955	-1.53754	6.88273e-06	0.000633193
chr3	41131242	41131642	401	5.85655	4.77608	6.46736	-1.44773	6.89497e-06	0.000633496
chr12	29712833	29713233	401	5.44003	4.33743	6.05763	-1.49877	6.90708e-06	0.000633785
chr13	83025130	83025530	401	4.06511	2.58601	4.77993	-1.97903	6.92226e-06	0.000634355
chr11	125951032	125951432	401	6.07658	5.10254	6.65278	-1.37149	6.97074e-06	0.000637972
chr1	182087977	182088377	401	4.32419	3.01338	4.99947	-1.81612	6.98218e-06	0.000638193
chr10	58820843	58821243	401	4.5012	3.17803	5.17958	-1.77699	7.01566e-06	0.000640108
chr1	46522201	46522601	401	5.75224	4.70323	6.35318	-1.42707	7.0251e-06	0.000640108
chr10	83346179	83346579	401	4.58091	3.25322	5.26042	-1.76582	7.03027e-06	0.000640108
chr20	12113695	12114095	401	5.32641	4.13666	5.96945	-1.57175	7.04916e-06	0.000640668
chr11	83051788	83052188	401	6.50304	5.43666	7.10947	-1.4252	7.06131e-06	0.000640668
chr7	11261478	11261878	401	5.56241	4.51484	6.16289	-1.4435	7.06359e-06	0.000640668
chr4	108941991	108942391	401	4.31778	2.98565	4.99839	-1.8182	7.15884e-06	0.000648476
chr7	38306071	38306471	401	6.30373	5.22605	6.91369	-1.42952	7.21629e-06	0.000652844
chr7	88254721	88255121	401	6.78138	5.66581	7.40289	-1.47343	7.27998e-06	0.000657764
chrX	118038812	118039212	401	4.70081	3.44186	5.3627	-1.70136	7.31902e-06	0.000660448
chr9	20382450	20382850	401	4.07101	2.57932	4.78858	-1.97771	7.32911e-06	0.000660516
chr11	8227370	8227770	401	6.31215	5.29039	6.9043	-1.39222	7.35681e-06	0.000662169
chr5	5335840	5336240	401	7.48755	6.38438	8.10532	-1.49407	7.39475e-06	0.000664738
chr3	172680635	172681035	401	6.02449	5.00357	6.61636	-1.39383	7.40974e-06	0.00066524
chr11	15062606	15063006	401	6.79689	5.75923	7.39419	-1.41814	7.46937e-06	0.000669744
chr11	86101879	86102279	401	5.6651	4.55032	6.28638	-1.47783	7.50368e-06	0.000671968
chr3	105274931	105275331	401	6.25691	5.18317	6.86564	-1.42928	7.53983e-06	0.000674353
chr3	16994938	16995338	401	5.60169	4.54142	6.2062	-1.4442	7.58531e-06	0.000677564
chr1	214377949	214378349	401	5.9292	4.90628	6.52172	-1.39566	7.65098e-06	0.000682568
chr5	39459065	39459465	401	4.80942	3.55448	5.47024	-1.68745	7.72956e-06	0.000688709
chr20	41391615	41392015	401	6.30932	5.28231	6.90317	-1.39362	7.87057e-06	0.000700392
chr12	88925947	88926347	401	4.63711	3.31138	5.31613	-1.7487	7.89723e-06	0.000700597
chr6	7787149	7787549	401	4.86376	3.6942	5.50109	-1.62107	7.90114e-06	0.000700597
chr13	85313733	85314133	401	4.34854	2.91924	5.05225	-1.86045	7.90871e-06	0.000700597
chr1	182175305	182175705	401	3.88403	2.32062	4.61664	-2.09377	7.91249e-06	0.000700597
chr12	39490906	39491306	401	4.96972	3.69475	5.63581	-1.67463	7.93878e-06	0.00070096
chr8	133320535	133320935	401	4.0503	2.57866	4.76349	-1.97031	7.94506e-06	0.00070096
chr8	19389237	19389637	401	3.39744	1.31838	4.21575	-2.6877	7.94632e-06	0.00070096
chr6	6593878	6594278	401	4.29615	2.99065	4.97009	-1.80646	8.01336e-06	0.000705994
chr1	157085435	157085835	401	4.31432	2.8929	5.01623	-1.85795	8.04114e-06	0.00070756
chr2	20577867	20578267	401	6.90009	5.84245	7.50377	-1.43018	8.07364e-06	0.000709538
chr1	47013190	47013590	401	4.13569	2.69304	4.84243	-1.92163	8.09804e-06	0.000710063
chr2	6201877	6202277	401	4.59833	3.37961	5.2494	-1.69445	8.09969e-06	0.000710063
chr2	45992328	45992728	401	5.88101	4.76439	6.50284	-1.46735	8.16053e-06	0.000714121
chr8	19608509	19608909	401	3.78782	2.16434	4.53236	-2.17176	8.16617e-06	0.000714121
chr4	150722866	150723266	401	3.78268	2.16889	4.52534	-2.17103	8.19254e-06	0.000715142
chr9	74824597	74824997	401	4.40188	3.07617	5.08089	-1.78565	8.19806e-06	0.000715142
chr12	106106851	106107251	401	5.47355	4.40749	6.07988	-1.46057	8.21095e-06	0.000715262
chr3	170488791	170489191	401	4.90116	3.67599	5.55399	-1.64446	8.21966e-06	0.000715262
chr1	197423003	197423403	401	4.82968	3.64741	5.47062	-1.63315	8.28127e-06	0.000719555
chr20	9119784	9120184	401	4.86203	3.63862	5.51438	-1.65052	8.30288e-06	0.000719555
chr1	167564644	167565044	401	4.98108	3.79368	5.62346	-1.61688	8.30435e-06	0.000719555
chr2	197575987	197576387	401	4.65588	3.32517	5.33614	-1.74928	8.31853e-06	0.000719555
chr2	122236517	122236917	401	4.48583	3.19497	5.15603	-1.75757	8.33062e-06	0.000719555
chr5	82632911	82633311	401	4.07039	2.57988	4.7877	-1.96871	8.33591e-06	0.000719555
chr7	2785083	2785483	401	4.69957	3.44304	5.36081	-1.69364	8.34595e-06	0.000719555
chr6	21371703	21372103	401	4.69666	3.39745	5.36899	-1.72364	8.35036e-06	0.000719555
chr5	121274028	121274428	401	5.55795	4.37276	6.19971	-1.54148	8.40763e-06	0.000723609
chr9	6102574	6102974	401	5.71506	4.60519	6.33486	-1.47199	8.44089e-06	0.000725589
chr11	86473969	86474369	401	5.03133	3.77412	5.69276	-1.65461	8.45486e-06	0.000725907
chr6	39280357	39280757	401	5.44228	4.33392	6.06163	-1.49898	8.50142e-06	0.000728507
chr1	211705504	211705904	401	4.54905	3.2351	5.22512	-1.74962	8.50574e-06	0.000728507
chr15	99454909	99455309	401	6.06794	5.0675	6.65305	-1.37338	8.55998e-06	0.000731964
chrX	11386044	11386444	401	5.69916	4.66455	6.29548	-1.41556	8.5668e-06	0.000731964
chr7	46290993	46291393	401	4.64186	3.34362	5.31395	-1.73189	8.61054e-06	0.000734815
chr1	160096692	160097092	401	6.62863	5.60181	7.22242	-1.3971	8.63874e-06	0.000736333
chr16	10828921	10829321	401	4.99762	3.82469	5.63591	-1.59929	8.66364e-06	0.000737241
chr8	118850086	118850486	401	5.0632	3.84674	5.71366	-1.61636	8.67023e-06	0.000737241
chr10	82190596	82190996	401	5.19622	4.13272	5.80175	-1.50139	8.68356e-06	0.00073743
chr6	101666278	101666678	401	4.94597	3.63872	5.62035	-1.69875	8.70138e-06	0.00073743
chr6	106181967	106182367	401	5.9627	4.89305	6.57016	-1.42142	8.71183e-06	0.00073743
chr8	139277246	139277646	401	4.88209	3.71468	5.5188	-1.61517	8.71416e-06	0.00073743
chr2	27706203	27706603	401	5.52201	4.49657	6.11535	-1.42675	8.77574e-06	0.000741755
chrX	22196160	22196560	401	4.0045	2.58186	4.70669	-1.96161	8.79203e-06	0.000742244
chr3	194212823	194213223	401	3.9656	2.47059	4.68389	-2.01606	8.83637e-06	0.000744141
chr4	156521530	156521930	401	4.02888	2.57864	4.73732	-1.96153	8.84008e-06	0.000744141
chr18	63514857	63515257	401	4.5573	3.30142	5.21837	-1.71342	8.85043e-06	0.000744141
chr5	59562972	59563372	401	4.7788	3.52693	5.43882	-1.67894	8.85657e-06	0.000744141
chr8	129848760	129849160	401	4.31828	2.8871	5.02242	-1.85634	8.86895e-06	0.000744298
chr5	118447402	118447802	401	5.65652	4.59641	6.26098	-1.43412	8.92297e-06	0.000747344
chr6	2476373	2476773	401	5.41466	4.32634	6.02789	-1.48125	8.92638e-06	0.000747344
chr6	58198285	58198685	401	5.74652	4.67497	6.35456	-1.43701	8.95319e-06	0.000748703
chr1	230825024	230825424	401	5.3603	4.32832	5.95577	-1.45579	8.97124e-06	0.000749326
chr6	131400442	131400842	401	4.90569	3.66223	5.56346	-1.65669	9.15142e-06	0.000763475
chr2	28614019	28614419	401	5.0308	3.86752	5.66633	-1.57964	9.21292e-06	0.0007677
chr3	179029101	179029501	401	4.75454	3.57111	5.39581	-1.63916	9.23296e-06	0.000768464
chr4	78689933	78690333	401	3.56367	1.575	4.36939	-2.51037	9.27369e-06	0.000770734
chr1	223500533	223500933	401	4.86068	3.57318	5.53001	-1.69745	9.28201e-06	0.000770734
chr10	93566405	93566805	401	4.19596	2.9047	4.86626	-1.82667	9.30524e-06	0.000771756
chr5	146553723	146554123	401	4.4714	3.17512	5.14298	-1.75134	9.31896e-06	0.00077196
chr11	19715359	19715759	401	5.38852	4.22814	6.02321	-1.54103	9.32951e-06	0.00077196
chr6	45728741	45729141	401	3.97219	2.46482	4.69313	-2.01257	9.36189e-06	0.000773734
chr7	116534885	116535285	401	3.7289	1.99896	4.49319	-2.25335	9.38861e-06	0.000774277
chr4	147577990	147578390	401	6.2406	5.26419	6.81761	-1.35861	9.39035e-06	0.000774277
chr8	125968975	125969375	401	5.16708	3.98974	5.80662	-1.57203	9.40744e-06	0.000774783
chr10	71244044	71244444	401	3.93462	2.31707	4.67801	-2.08531	9.49444e-06	0.000781039
chr15	35306251	35306651	401	5.1672	3.95576	5.81628	-1.60321	9.54984e-06	0.000783725
chr2	38947227	38947627	401	6.14358	5.14236	6.72895	-1.36926	9.55676e-06	0.000783725
chr2	46408907	46409307	401	5.47341	4.35969	6.09437	-1.4877	9.56032e-06	0.000783725
chr3	100891828	100892228	401	5.53666	4.46061	6.1461	-1.45264	9.59194e-06	0.000785407
chr3	168003024	168003424	401	4.67069	3.36324	5.34512	-1.73197	9.62787e-06	0.000787228
chr5	14908192	14908592	401	5.45237	4.36744	6.06457	-1.46926	9.63644e-06	0.000787228
chr1	86793055	86793455	401	5.07076	3.91487	5.70415	-1.57085	9.70042e-06	0.000789824
chr10	116774676	116775076	401	5.07076	3.91487	5.70415	-1.57085	9.70042e-06	0.000789824
chr9	79382458	79382858	401	4.44645	3.16599	5.11396	-1.74435	9.71033e-06	0.000789824
chr3	153140559	153140959	401	5.91112	4.933	6.48871	-1.36423	9.72002e-06	0.000789824
chr7	155858778	155859178	401	5.10006	3.97095	5.72561	-1.54591	9.72482e-06	0.000789824
chr3	31077100	31077500	401	5.51774	4.29487	6.16995	-1.57725	9.7352e-06	0.000789824
chr3	55524828	55525228	401	3.99826	2.46153	4.72539	-2.01259	9.75732e-06	0.000790712
chr1	86779402	86779802	401	5.86547	4.88979	6.44224	-1.36313	9.81207e-06	0.000794239
chr2	190979872	190980272	401	4.42523	3.17091	5.08589	-1.73785	9.82464e-06	0.000794347
chr4	110165876	110166276	401	4.96133	3.78313	5.60111	-1.59716	9.90144e-06	0.000799643
chr10	99345147	99345547	401	5.53199	4.44823	6.14383	-1.46219	1.00076e-05	0.000807294
chr1	93638469	93638869	401	3.9835	2.58211	4.68078	-1.9528	1.00193e-05	0.000807321
chr8	121600062	121600462	401	5.90096	4.89195	6.48891	-1.38509	1.00798e-05	0.000811271
chr5	36494952	36495352	401	4.84024	3.56675	5.50594	-1.68545	1.01159e-05	0.000813253
chr11	38315132	38315532	401	4.68164	3.41695	5.34504	-1.69809	1.01432e-05	0.00081452
chr1	220337342	220337742	401	6.27844	5.26091	6.86919	-1.37529	1.01567e-05	0.000814679
chrX	30304955	30305355	401	4.13892	2.80019	4.82116	-1.85768	1.01736e-05	0.000815112
chr5	32852466	32852866	401	5.23907	4.15214	5.85188	-1.50222	1.02082e-05	0.000815505
chr3	5796583	5796983	401	4.41307	3.16665	5.07163	-1.73409	1.02234e-05	0.000815505
chr3	151898883	151899283	401	4.62014	3.40224	5.271	-1.67976	1.02329e-05	0.000815505
chr6	122799887	122800287	401	4.24159	2.81573	4.94452	-1.86755	1.0237e-05	0.000815505
chr2	48738828	48739228	401	5.34746	4.26159	5.95995	-1.48391	1.02573e-05	0.000815505
chr10	117413945	117414345	401	3.97731	2.45939	4.70049	-2.0077	1.02628e-05	0.000815505
chr11	118820389	118820789	401	3.97731	2.45939	4.70049	-2.0077	1.02628e-05	0.000815505
chr4	172900888	172901288	401	3.53377	1.57453	4.3352	-2.50101	1.02708e-05	0.000815505
chr2	12318244	12318644	401	4.80419	3.58901	5.4543	-1.64502	1.03466e-05	0.000820602
chr1	59443431	59443831	401	5.23834	4.07253	5.8746	-1.55499	1.03907e-05	0.000822198
chr9	76371879	76372279	401	5.48179	4.39414	6.09482	-1.46474	1.03935e-05	0.000822198
chr12	109312201	109312601	401	4.55064	3.32596	5.20334	-1.69417	1.04015e-05	0.000822198
chr6	108684796	108685196	401	4.56539	3.309	5.2266	-1.70367	1.04281e-05	0.000823376
chr13	59144754	59145154	401	4.34882	2.98842	5.03635	-1.80106	1.0454e-05	0.000824499
chr17	34254749	34255149	401	4.33264	2.98677	5.01663	-1.79672	1.04685e-05	0.00082463
chr3	144053120	144053520	401	5.45221	4.33136	6.0753	-1.49255	1.04789e-05	0.00082463
chr6	105832295	105832695	401	4.91739	3.72549	5.56103	-1.6092	1.05146e-05	0.000826519
chr15	91704332	91704732	401	3.25986	0.992178	4.1017	-2.88645	1.05719e-05	0.00083005
chr2	19140742	19141142	401	5.3984	4.31269	6.01084	-1.47757	1.0583e-05	0.00083005
chrX	37521023	37521423	401	4.395	2.99622	5.09166	-1.81467	1.06062e-05	0.000830946
chr3	133461285	133461685	401	5.47385	4.48567	6.05485	-1.40642	1.06697e-05	0.000835001
chr5	10601429	10601829	401	7.65653	6.57546	8.26754	-1.48095	1.07e-05	0.000836447
chr5	9440459	9440859	401	5.94257	4.80083	6.57184	-1.48295	1.07714e-05	0.000841094
chr22	27669390	27669790	401	5.49416	4.45725	6.09121	-1.42758	1.08792e-05	0.000848575
chr6	73394536	73394936	401	3.64359	4.3214	2.32272	2.14236	1.09059e-05	0.000849676
chr13	82627232	82627632	401	3.90491	2.32424	4.64102	-2.06969	1.09173e-05	0.000849676
chr10	130934971	130935371	401	5.47683	4.40036	6.08641	-1.45459	1.09758e-05	0.000852375
chr1	244214269	244214669	401	6.8308	5.82609	7.41733	-1.38636	1.0977e-05	0.000852375
chr20	6162267	6162667	401	3.64709	1.80373	4.43061	-2.35611	1.09881e-05	0.000852375
chr5	84393934	84394334	401	5.60568	4.56732	6.20321	-1.41893	1.10185e-05	0.000853799
chr1	211551680	211552080	401	6.00765	4.95424	6.60999	-1.39964	1.12332e-05	0.000869481
chr17	61201177	61201577	401	4.02102	2.46122	4.7529	-2.00618	1.13483e-05	0.000876223
chr6	9576464	9576864	401	3.69914	2.00125	4.45767	-2.23834	1.13569e-05	0.000876223
chr15	50256416	50256816	401	4.13382	2.80406	4.81385	-1.8485	1.13575e-05	0.000876223
chr5	96823812	96824212	401	5.40065	4.31008	6.01459	-1.47723	1.14289e-05	0.000880773
chr18	31206825	31207225	401	6.26097	5.28354	6.83832	-1.34783	1.14606e-05	0.000882251
chrX	67605223	67605623	401	6.13672	5.12839	6.72444	-1.36599	1.14837e-05	0.000883073
chr9	591240	591640	401	4.80896	3.64203	5.44553	-1.61017	1.15313e-05	0.000885769
chr16	68921625	68922025	401	4.38685	4.94167	3.47368	1.71234	1.16058e-05	0.000890524
chr16	30927861	30928261	401	5.30462	5.79744	4.55026	1.42337	1.16661e-05	0.000894183
chr15	86021867	86022267	401	3.46501	1.58169	4.2549	-2.48829	1.17649e-05	0.000900025
chr19	17294015	17294415	401	5.00018	5.52499	4.16693	1.49022	1.17678e-05	0.000900025
chr22	39319495	39319895	401	5.55438	6.02681	4.84728	1.39126	1.17816e-05	0.000900111
chr14	45679839	45680239	401	5.0833	3.89963	5.72464	-1.57542	1.17969e-05	0.000900308
chr3	5013207	5013607	401	5.58817	4.53714	6.18975	-1.42254	1.18424e-05	0.000902803
chr6	9766218	9766618	401	6.0178	5.06352	6.58719	-1.34247	1.1864e-05	0.000903477
chr1	234501044	234501444	401	5.27967	4.27468	5.86629	-1.44063	1.19677e-05	0.000910305
chr12	114769579	114769979	401	5.55387	4.56823	6.13401	-1.38767	1.19848e-05	0.000910305
chr16	10601478	10601878	401	4.42241	3.15538	5.08642	-1.7283	1.19923e-05	0.000910305
chr2	216713785	216714185	401	3.75235	2.00306	4.52005	-2.23541	1.20381e-05	0.000912809
chr20	51387591	51387991	401	3.53359	1.57431	4.33504	-2.48991	1.20592e-05	0.000913424
chr7	121305103	121305503	401	5.09391	3.89749	5.73882	-1.58549	1.21337e-05	0.000917661
chr16	55668387	55668787	401	3.97966	2.45656	4.70393	-1.99704	1.2141e-05	0.000917661
chr11	8068666	8069066	401	6.14486	5.20492	6.70923	-1.32864	1.21699e-05	0.000918626
chr11	114354086	114354486	401	4.32761	2.99294	5.00886	-1.78368	1.21798e-05	0.000918626
chr9	28234872	28235272	401	5.03774	3.83596	5.68414	-1.59467	1.22203e-05	0.000920698
chr5	139373638	139374038	401	5.34197	4.36201	5.92019	-1.42043	1.22381e-05	0.000921063
chr14	102568122	102568522	401	3.64273	4.31956	2.32577	2.12735	1.22621e-05	0.000921259
chr3	117628917	117629317	401	3.90643	2.45972	4.61408	-1.99497	1.22668e-05	0.000921259
chr16	89301608	89302008	401	4.42642	3.16976	5.08771	-1.72267	1.24272e-05	0.000932318
chr7	111364415	111364815	401	5.62492	4.62068	6.21129	-1.3875	1.24872e-05	0.000935825
chr5	37696355	37696755	401	4.38105	3.1001	5.04869	-1.74656	1.25498e-05	0.000938149
chr10	53256581	53256981	401	6.03878	5.05858	6.61709	-1.34892	1.25609e-05	0.000938149
chrX	13903458	13903858	401	4.62056	3.38509	5.27618	-1.67365	1.25611e-05	0.000938149
chr1	230849438	230849838	401	5.44459	4.35513	6.05818	-1.46515	1.25712e-05	0.000938149
chr8	6594106	6594506	401	4.96831	3.78824	5.60863	-1.58726	1.2587e-05	0.000938332
chr3	61708276	61708676	401	3.92917	2.32395	4.67015	-2.06256	1.26013e-05	0.000938409
chr1	240783644	240784044	401	7.27308	6.19112	7.88436	-1.44715	1.26838e-05	0.000943566
chr4	146051949	146052349	401	4.59129	3.29247	5.26352	-1.71146	1.27591e-05	0.000948166
chr4	4991071	4991471	401	5.28687	4.16781	5.90943	-1.50408	1.28529e-05	0.000954135
chr12	74328602	74329002	401	6.05225	5.03944	6.64146	-1.36513	1.28934e-05	0.000956142
chr3	196135999	196136399	401	5.28413	4.22629	5.88787	-1.46211	1.29773e-05	0.000961356
chr10	104300684	104301084	401	5.9289	4.99558	6.49094	-1.32829	1.30518e-05	0.00096535
chr2	20796450	20796850	401	4.47082	3.15461	5.14746	-1.73971	1.30675e-05	0.00096535
chr1	97680568	97680968	401	5.05484	3.96663	5.66804	-1.52048	1.30722e-05	0.00096535
chr2	230640422	230640822	401	5.7994	4.81745	6.3783	-1.35795	1.31468e-05	0.00096896
chr1	61481234	61481634	401	6.40405	5.4065	6.9882	-1.36078	1.31485e-05	0.00096896
chr2	125654222	125654622	401	4.77622	3.55675	5.4275	-1.63621	1.31862e-05	0.000970728
chr11	119475273	119475673	401	4.70877	3.49566	5.35831	-1.64213	1.32091e-05	0.000971405
chr13	110507102	110507502	401	4.12606	2.70441	4.82802	-1.88288	1.32996e-05	0.000977043
chr5	111641562	111641962	401	5.12563	3.95948	5.76199	-1.55716	1.33424e-05	0.000979173
chr15	101069077	101069477	401	5.21047	4.08602	5.83464	-1.51604	1.3367e-05	0.000979964
chr7	151796501	151796901	401	5.54051	4.56656	6.11669	-1.37825	1.34249e-05	0.000983188
chr8	48682679	48683079	401	5.74729	4.7838	6.31987	-1.35053	1.34552e-05	0.000984388
chr17	56392359	56392759	401	4.1475	2.7034	4.85456	-1.88648	1.3502e-05	0.000986791
chr5	5390118	5390518	401	4.66629	3.44943	5.31686	-1.65152	1.35582e-05	0.000989611
chr18	45617258	45617658	401	5.08405	3.92927	5.71712	-1.55105	1.35726e-05	0.000989611
chr1	160945849	160946249	401	3.6752	1.99751	4.43001	-2.22606	1.35833e-05	0.000989611
chr4	24594871	24595271	401	4.50799	3.227	5.17564	-1.7106	1.35966e-05	0.000989611
chr13	96238846	96239246	401	5.36017	4.19337	5.99671	-1.53297	1.36723e-05	0.000994098
chr2	173741835	173742235	401	4.34656	3.01417	5.02724	-1.77463	1.36884e-05	0.000994248
chr3	38031192	38031592	401	4.73199	3.58085	5.36401	-1.60622	1.37474e-05	0.000996873
chr2	133422989	133423389	401	4.35361	3.09151	5.01633	-1.7369	1.37607e-05	0.000996873
chr2	203340820	203341220	401	5.18298	4.06966	5.80382	-1.50949	1.37746e-05	0.000996873
chr9	70038242	70038642	401	4.16141	2.71194	4.86968	-1.88525	1.37809e-05	0.000996873
chr13	34044634	34045034	401	5.1951	4.06604	5.82064	-1.51836	1.38146e-05	0.00099829
chr13	72151211	72151611	401	4.49977	3.20175	5.1718	-1.72977	1.38393e-05	0.000999057
chr19	35994958	35995358	401	5.19536	5.6889	4.43929	1.46272	1.38693e-05	0.0010002
chr4	153181308	153181708	401	4.32662	2.99403	5.00734	-1.77481	1.38932e-05	0.00100091
chr2	160039518	160039918	401	3.52678	1.58153	4.32614	-2.47505	1.39894e-05	0.00100681
chr4	124121627	124122027	401	4.29361	2.89552	4.99011	-1.8172	1.40188e-05	0.0010079
chr2	84247592	84247992	401	4.73685	3.52947	5.38481	-1.63551	1.40886e-05	0.00101189
chr19	35309441	35309841	401	5.43094	4.38595	6.03059	-1.43139	1.41181e-05	0.00101283
chr14	28652841	28653241	401	5.25322	4.07938	5.89177	-1.54558	1.41303e-05	0.00101283
chrX	100980751	100981151	401	6.52791	5.53277	7.11125	-1.35738	1.4273e-05	0.00102202
chr6	12331971	12332371	401	5.16058	3.9992	5.79555	-1.54321	1.4296e-05	0.00102209
chr10	117609074	117609474	401	5.48275	4.39575	6.09558	-1.45857	1.43029e-05	0.00102209
chr5	32472961	32473361	401	4.34697	3.07985	5.01101	-1.73578	1.43285e-05	0.00102214
chr5	92836919	92837319	401	4.99618	3.74357	5.65639	-1.63277	1.43343e-05	0.00102214
chr11	113974818	113975218	401	4.28698	2.99833	4.95661	-1.76252	1.43469e-05	0.00102214
chr8	130604326	130604726	401	5.30862	4.23956	5.91588	-1.4664	1.44892e-05	0.00103049
chr1	172895752	172896152	401	4.50293	3.23376	5.16751	-1.70219	1.4496e-05	0.00103049
chr4	186765713	186766113	401	5.1334	3.99421	5.76192	-1.53265	1.45077e-05	0.00103049
chr6	110700606	110701006	401	4.74351	3.5382	5.3909	-1.6331	1.45513e-05	0.00103255
chr3	118408462	118408862	401	3.67194	2.00043	4.42561	-2.21973	1.4621e-05	0.00103645
chr7	117132660	117133060	401	5.8409	4.76237	6.45112	-1.4224	1.4675e-05	0.00103861
chr2	196481298	196481698	401	5.40366	4.30507	6.02005	-1.46976	1.46809e-05	0.00103861
chr2	7180643	7181043	401	4.09075	2.69677	4.78629	-1.87346	1.47377e-05	0.00104075
chr8	33252597	33252997	401	3.90307	2.32666	4.63831	-2.0473	1.47405e-05	0.00104075
chr7	41774980	41775380	401	5.17007	4.10506	5.77606	-1.47794	1.47751e-05	0.00104215
chr6	75397966	75398366	401	4.20505	2.81309	4.90011	-1.83505	1.49397e-05	0.00105271
chr9	73176512	73176912	401	5.81199	4.87404	6.37566	-1.33337	1.49672e-05	0.00105345
chr9	13410535	13410935	401	3.58632	1.80608	4.35936	-2.33026	1.49951e-05	0.00105345
chr5	41527140	41527540	401	5.4453	4.36633	6.05565	-1.45198	1.50052e-05	0.00105345
chr1	154767557	154767957	401	3.45148	1.58908	4.23806	-2.47073	1.50097e-05	0.00105345
chr21	42094058	42094458	401	4.26988	2.99704	4.93542	-1.75718	1.50751e-05	0.00105699
chr18	54158426	54158826	401	5.11234	3.98027	5.73877	-1.52772	1.51038e-05	0.00105771
chr3	22106462	22106862	401	6.99221	5.99421	7.57651	-1.37761	1.51153e-05	0.00105771
chr3	33181113	33181513	401	3.60957	1.81273	4.38542	-2.32706	1.51578e-05	0.00105964
chr8	133529886	133530286	401	4.09708	2.68902	4.7959	-1.87453	1.52015e-05	0.00106105
chr1	76238201	76238601	401	4.73932	3.54323	5.38414	-1.62711	1.5208e-05	0.00106105
chr17	33235195	33235595	401	4.14894	2.80819	4.83168	-1.82603	1.5252e-05	0.00106308
chr2	149994326	149994726	401	5.8131	4.80887	6.39947	-1.36297	1.53077e-05	0.00106591
chr12	54411376	54411776	401	5.22975	4.09988	5.85553	-1.51003	1.54102e-05	0.00107199
chr2	27915937	27916337	401	3.13005	0.584361	4.0009	-3.14397	1.54469e-05	0.00107348
chr3	27360520	27360920	401	5.90086	4.89043	6.48929	-1.36185	1.55527e-05	0.00107978
chr5	128217141	128217541	401	5.15307	3.99512	5.78706	-1.54091	1.56353e-05	0.00108445
chr4	1777893	1778293	401	5.61014	4.5895	6.20192	-1.38997	1.57062e-05	0.0010883
chrX	39895616	39896016	401	5.83584	4.83494	6.42111	-1.35983	1.57308e-05	0.00108894
chr6	46756902	46757302	401	3.65106	1.79861	4.43605	-2.33444	1.57789e-05	0.00109115
chr9	70036689	70037089	401	4.06311	2.70314	4.75054	-1.8655	1.58043e-05	0.00109115
chr15	83286156	83286556	401	5.57197	4.45947	6.19256	-1.46639	1.58091e-05	0.00109115
chr15	79179035	79179435	401	4.60877	3.43495	5.24732	-1.62954	1.58579e-05	0.00109345
chr11	7551585	7551985	401	4.72848	3.52284	5.37595	-1.62849	1.59078e-05	0.00109583
chr3	83934422	83934822	401	5.52044	4.4547	6.12667	-1.43384	1.61048e-05	0.00110738
chr7	151745247	151745647	401	5.86358	4.8355	6.45778	-1.37547	1.61068e-05	0.00110738
chr15	87619231	87619631	401	5.18535	4.06566	5.8081	-1.50683	1.61448e-05	0.00110892
chr10	5951100	5951500	401	5.24363	4.16282	5.85456	-1.47382	1.61682e-05	0.00110944
chr6	92589987	92590387	401	4.16366	2.81444	4.84848	-1.82153	1.62308e-05	0.00111266
chr2	16400298	16400698	401	4.16954	2.90708	4.83236	-1.78306	1.63058e-05	0.00111672
chr2	125694892	125695292	401	4.50176	3.23498	5.1657	-1.69369	1.65403e-05	0.00113168
chr6	13267331	13267731	401	4.77026	3.59866	5.40817	-1.60255	1.65884e-05	0.00113388
chr12	27922474	27922874	401	6.38779	5.38304	6.97433	-1.35243	1.66117e-05	0.00113437
chr8	117610443	117610843	401	4.44456	3.0851	5.13186	-1.75874	1.66608e-05	0.00113663
chr4	55385207	55385607	401	4.28779	2.90355	4.98103	-1.80072	1.68675e-05	0.00114962
chr1	208090314	208090714	401	4.97417	3.77615	5.61953	-1.591	1.69015e-05	0.00115083
chr4	153677005	153677405	401	5.21692	4.00356	5.86652	-1.57632	1.69207e-05	0.00115103
chr11	84097197	84097597	401	4.70663	3.59082	5.32821	-1.58539	1.71269e-05	0.00116394
chr1	211928995	211929395	401	4.86134	3.75129	5.4812	-1.54932	1.71722e-05	0.0011649
chr14	61438870	61439270	401	5.47898	4.43129	6.07949	-1.41845	1.7174e-05	0.0011649
chr19	10044404	10044804	401	3.16316	3.94417	1.3352	2.7469	1.71973e-05	0.00116531
chrX	115259148	115259548	401	4.21264	2.90341	4.88752	-1.78096	1.72195e-05	0.00116531
chr3	197324744	197325144	401	3.99734	2.58765	4.69654	-1.90873	1.72294e-05	0.00116531
chr11	76577214	76577614	401	5.41625	4.27455	6.04551	-1.4975	1.72518e-05	0.00116571
chr11	44607361	44607761	401	4.29281	3.01216	4.96037	-1.74731	1.73187e-05	0.00116881
chr10	26524284	26524684	401	5.07909	3.98803	5.69317	-1.49937	1.73308e-05	0.00116881
chr3	161217475	161217875	401	5.47191	4.45331	6.06302	-1.40482	1.73932e-05	0.00117191
chr11	103007554	103007954	401	4.917	3.74091	5.55618	-1.57741	1.75426e-05	0.00118085
chr9	115755421	115755821	401	4.52413	3.24716	5.19074	-1.69445	1.75906e-05	0.00118295
chr18	29154970	29155370	401	4.91272	3.65323	5.57475	-1.6405	1.76203e-05	0.00118349
chr1	246794796	246795196	401	5.91906	4.96963	6.48676	-1.32404	1.76321e-05	0.00118349
chr1	68375900	68376300	401	5.6356	4.60972	6.22908	-1.38551	1.76902e-05	0.00118627
chr1	76337041	76337441	401	4.0695	2.81015	4.73149	-1.81802	1.77669e-05	0.00119028
chr14	81384885	81385285	401	4.29581	2.98709	4.97056	-1.75323	1.78333e-05	0.0011936
chr10	83848718	83849118	401	4.35769	3.08729	5.02259	-1.72122	1.78693e-05	0.00119488
chr7	33722367	33722767	401	7.82791	6.755	8.43638	-1.4676	1.79294e-05	0.00119776
chrX	153886901	153887301	401	4.42363	3.15177	5.08891	-1.70471	1.79904e-05	0.00120071
chr6	52514534	52514934	401	4.45127	3.18052	5.11625	-1.70346	1.80099e-05	0.00120088
chr3	8603156	8603556	401	3.95657	2.58349	4.64715	-1.90712	1.80633e-05	0.0012033
chr6	15026801	15027201	401	5.59512	4.63158	6.16772	-1.35205	1.81556e-05	0.00120679
chr11	50412396	50412796	401	3.55466	4.24827	2.16885	2.16979	1.81588e-05	0.00120679
chr11	19919236	19919636	401	5.68228	4.63529	6.28258	-1.39688	1.81669e-05	0.00120679
chrX	130097944	130098344	401	4.348	3.16642	4.98874	-1.68746	1.82769e-05	0.00121296
chr6	92132459	92132859	401	5.57154	4.48502	6.18423	-1.43598	1.83463e-05	0.00121577
chr15	22229989	22230389	401	4.37262	3.0905	5.04057	-1.72248	1.83535e-05	0.00121577
chr3	36147999	36148399	401	5.34045	4.26006	5.95124	-1.45766	1.83994e-05	0.00121656
chr4	6747713	6748113	401	4.19426	2.90249	4.86469	-1.77442	1.84126e-05	0.00121656
chr14	69519290	69519690	401	4.76138	3.55807	5.40821	-1.61209	1.84171e-05	0.00121656
chr3	4906284	4906684	401	5.13243	3.94934	5.7736	-1.56078	1.84594e-05	0.00121822
chr3	39126001	39126401	401	4.73261	3.57954	5.36518	-1.58953	1.85408e-05	0.00122209
chr6	158642230	158642630	401	6.03083	5.01799	6.62004	-1.35246	1.85544e-05	0.00122209
chr5	132265678	132266078	401	6.35338	5.40665	6.92014	-1.31269	1.85699e-05	0.00122209
chr3	189316241	189316641	401	4.84211	3.68867	5.47479	-1.57112	1.85918e-05	0.00122239
chr13	48009235	48009635	401	4.06443	2.70213	4.75242	-1.85269	1.87213e-05	0.00122976
chr4	21117715	21118115	401	4.99452	3.74418	5.65413	-1.62703	1.87492e-05	0.00123045
chr2	215900198	215900598	401	3.75189	2.17282	4.48768	-2.10564	1.88667e-05	0.00123702
chrX	100748123	100748523	401	4.60814	3.38149	5.26138	-1.64744	1.89874e-05	0.00124345
chr3	141302369	141302769	401	4.54652	3.31244	5.20177	-1.66106	1.89999e-05	0.00124345
chr3	192851801	192852201	401	5.79231	4.84332	6.35986	-1.32311	1.91698e-05	0.00125341
chr3	148021417	148021817	401	4.63972	3.32814	5.3152	-1.69964	1.93307e-05	0.0012619
chr14	64682090	64682490	401	4.21192	2.9041	4.88644	-1.77249	1.93354e-05	0.0012619
chr17	66691636	66692036	401	4.7333	3.53449	5.37887	-1.61537	1.93867e-05	0.00126312
chr2	9175070	9175470	401	5.43097	4.37309	6.03472	-1.4268	1.93898e-05	0.00126312
chr7	85587791	85588191	401	4.3869	3.09461	5.05747	-1.72194	1.94441e-05	0.0012655
chr12	123062903	123063303	401	6.04283	5.07895	6.61555	-1.31943	1.95508e-05	0.00126955
chr13	73287017	73287417	401	4.54742	3.34766	5.19327	-1.64909	1.95576e-05	0.00126955
chr9	75148555	75148955	401	3.70413	1.99567	4.46457	-2.19983	1.95602e-05	0.00126955
chr9	69898800	69899200	401	4.3698	3.00762	5.05777	-1.76457	1.96166e-05	0.00127204
chr11	98710958	98711358	401	4.68789	3.52192	5.32418	-1.60073	1.97882e-05	0.00128127
chr5	127867347	127867747	401	5.2597	4.25166	5.84734	-1.41874	1.97952e-05	0.00128127
chr12	27866690	27867090	401	4.55334	3.34208	5.20237	-1.65094	1.9821e-05	0.00128177
chr7	12583911	12584311	401	4.96024	3.87325	5.57307	-1.50998	1.98606e-05	0.00128316
chr2	95330319	95330719	401	5.09871	4.07709	5.6908	-1.45387	1.99167e-05	0.00128561
chr8	118195862	118196262	401	3.78588	2.16456	4.53001	-2.10482	1.99361e-05	0.00128569
chr1	241782345	241782745	401	4.51237	3.33311	5.15246	-1.64167	2.00387e-05	0.00129049
chr7	12303095	12303495	401	6.68219	5.66185	7.27387	-1.36852	2.0063e-05	0.00129049
chr5	174503726	174504126	401	4.96859	3.81944	5.60003	-1.54953	2.00652e-05	0.00129049
chr5	75602089	75602489	401	5.92071	4.84974	6.52858	-1.40491	2.01182e-05	0.00129271
chr2	209368903	209369303	401	6.32563	5.3846	6.89039	-1.3054	2.01513e-05	0.00129367
chr9	110351068	110351468	401	4.90235	3.72386	5.54222	-1.57911	2.02157e-05	0.00129663
chr4	158810462	158810862	401	5.56596	4.54621	6.15744	-1.38326	2.02831e-05	0.00129927
chr13	83840121	83840521	401	3.9116	2.45451	4.62157	-1.95559	2.02937e-05	0.00129927
chr1	168112940	168113340	401	4.93671	3.85132	5.54906	-1.51362	2.03218e-05	0.0012999
chr7	12162669	12163069	401	6.13366	5.10134	6.72924	-1.36655	2.05343e-05	0.0013111
chr17	44901377	44901777	401	4.07235	2.69321	4.76437	-1.84879	2.05464e-05	0.0013111
chr4	121784971	121785371	401	4.91518	3.74322	5.5532	-1.5681	2.05525e-05	0.0013111
chr2	158695779	158696179	401	4.14166	2.81613	4.82063	-1.80167	2.05962e-05	0.0013127
chr5	102715405	102715805	401	5.71467	4.74268	6.29017	-1.3383	2.06438e-05	0.00131455
chr11	65555768	65556168	401	5.44808	4.44105	6.03538	-1.38771	2.0722e-05	0.00131835
chr3	31937176	31937576	401	4.773	3.57836	5.41741	-1.60151	2.07519e-05	0.00131906
chr5	29208036	29208436	401	4.99037	3.80486	5.63222	-1.56905	2.08188e-05	0.00132168
chr7	144842519	144842919	401	5.73699	4.82377	6.29183	-1.30819	2.08305e-05	0.00132168
chr1	208231822	208232222	401	4.75047	3.60568	5.38064	-1.58054	2.08655e-05	0.00132212
chr7	120867979	120868379	401	7.08327	6.10309	7.66156	-1.36017	2.08748e-05	0.00132212
chr6	125872569	125872969	401	5.20159	4.14336	5.80545	-1.45277	2.09006e-05	0.00132257
chr18	63553072	63553472	401	4.03247	2.57179	4.74324	-1.9031	2.09933e-05	0.00132671
chr7	7765449	7765849	401	4.74564	3.5176	5.39925	-1.6262	2.10035e-05	0.00132671
chr1	195899723	195900123	401	5.17359	4.06784	5.79215	-1.49209	2.10755e-05	0.00133007
chr16	69417573	69417973	401	5.22151	4.11157	5.84134	-1.48526	2.11172e-05	0.00133151
chr13	76965854	76966254	401	5.64471	4.66111	6.22417	-1.35175	2.11405e-05	0.0013318
chr8	41659026	41659426	401	4.43746	3.09556	5.12048	-1.73754	2.11641e-05	0.00133209
chr1	70328390	70328790	401	5.69593	4.6897	6.28297	-1.3647	2.11896e-05	0.00133252
chr4	183876221	183876621	401	6.18939	5.24428	6.75558	-1.30324	2.12687e-05	0.0013363
chr21	27423037	27423437	401	5.4746	4.39409	6.08543	-1.43704	2.13834e-05	0.00134231
chr3	41118610	41119010	401	5.34658	4.42527	5.90433	-1.36824	2.1471e-05	0.00134662
chr3	87321095	87321495	401	5.23232	4.15155	5.84324	-1.46623	2.16087e-05	0.00135406
chr15	30953884	30954284	401	6.02621	5.05282	6.6022	-1.32054	2.17145e-05	0.00135948
chr5	135458944	135459344	401	4.46031	3.22623	5.11555	-1.66614	2.17814e-05	0.00136233
chr11	95359034	95359434	401	5.10626	4.04718	5.71039	-1.46833	2.18145e-05	0.00136233
chrX	65635438	65635838	401	4.55661	3.39018	5.19305	-1.61842	2.18178e-05	0.00136233
chr5	76787215	76787615	401	4.10937	2.80659	4.78261	-1.797	2.19711e-05	0.0013707
chrX	135096891	135097291	401	4.55332	3.3936	5.18783	-1.61614	2.2062e-05	0.00137515
chr2	1586921	1587321	401	4.53604	3.38032	5.16939	-1.61552	2.21849e-05	0.00138159
chr9	84322856	84323256	401	4.6147	3.39233	5.26677	-1.63698	2.22646e-05	0.00138534
chr22	25747457	25747857	401	5.07786	3.96891	5.69739	-1.49943	2.23288e-05	0.00138702
chr2	183950586	183950986	401	3.42831	1.58363	4.21205	-2.43793	2.23308e-05	0.00138702
chr3	700544	700944	401	5.48135	4.46295	6.0724	-1.39012	2.23584e-05	0.00138752
chr18	44602857	44603257	401	4.33823	3.00229	5.01978	-1.74626	2.24678e-05	0.00139308
chr5	96492638	96493038	401	5.2125	4.16789	5.81203	-1.43928	2.25011e-05	0.00139392
chr5	5014792	5015192	401	5.31816	4.21722	5.93526	-1.47089	2.27018e-05	0.00140513
chr2	223641123	223641523	401	4.72743	3.63251	5.3427	-1.55075	2.27454e-05	0.0014066
chrX	78068741	78069141	401	4.31051	2.99086	4.98801	-1.74005	2.29278e-05	0.00141664
chr13	72125591	72125991	401	6.07131	4.99943	6.67946	-1.39533	2.29673e-05	0.00141784
chr16	48013457	48013857	401	3.78524	2.16518	4.52913	-2.09392	2.30583e-05	0.00142143
chr7	93043509	93043909	401	6.4892	5.55277	7.05233	-1.30436	2.30858e-05	0.00142143
chr3	161403211	161403611	401	5.10248	4.05166	5.70399	-1.4621	2.31042e-05	0.00142143
chr5	131219564	131219964	401	4.49435	3.24457	5.1538	-1.66768	2.31057e-05	0.00142143
chr15	75104778	75105178	401	4.7629	3.61731	5.39331	-1.56593	2.31923e-05	0.00142445
chr7	12107772	12108172	401	4.63645	3.45042	5.27845	-1.60962	2.31951e-05	0.00142445
chr7	96219350	96219750	401	6.3552	5.35372	6.94066	-1.33715	2.3237e-05	0.00142578
chr11	2933339	2933739	401	6.64926	5.71061	7.21318	-1.31087	2.33301e-05	0.00142923
chr3	19889206	19889606	401	6.83556	5.81973	7.42577	-1.35904	2.33337e-05	0.00142923
chr1	246827446	246827846	401	4.8602	3.65878	5.50651	-1.59219	2.35036e-05	0.00143839
chr1	195739012	195739412	401	6.29	5.30713	6.8692	-1.32188	2.36905e-05	0.00144858
chr16	74594577	74594977	401	4.78637	3.55836	5.43997	-1.61391	2.37473e-05	0.00144987
chr7	127905668	127906068	401	3.9333	2.45632	4.64766	-1.94439	2.37526e-05	0.00144987
chr9	114720310	114720710	401	3.72585	2.17178	4.45656	-2.08777	2.39436e-05	0.00146027
chrX	9416905	9417305	401	5.56076	4.53735	6.15344	-1.38318	2.40908e-05	0.00146798
chr9	106588622	106589022	401	4.6404	3.46376	5.27974	-1.60366	2.416e-05	0.00147093
chrX	77431273	77431673	401	3.99261	2.59317	4.68943	-1.88108	2.42764e-05	0.00147598
chr2	200357066	200357466	401	4.22428	2.91257	4.89979	-1.75635	2.42847e-05	0.00147598
chr4	188002579	188002979	401	5.34226	4.30608	5.93909	-1.4137	2.43223e-05	0.0014763
chr10	84540130	84540530	401	5.20428	4.10824	5.81989	-1.47153	2.43456e-05	0.0014763
chr10	60481199	60481599	401	4.79712	3.65683	5.42596	-1.55999	2.43526e-05	0.0014763
chr13	49098160	49098560	401	4.23092	2.90414	4.9102	-1.76014	2.44763e-05	0.00148215
chr2	95316902	95317302	401	4.79315	3.62185	5.43098	-1.58278	2.44909e-05	0.00148215
chr19	46303986	46304386	401	4.41143	4.96171	3.51076	1.59561	2.46475e-05	0.00149035
chr2	166239525	166239925	401	4.01478	2.59432	4.71647	-1.88065	2.48133e-05	0.00149909
chr12	92602534	92602934	401	4.47976	3.24261	5.13584	-1.65837	2.49317e-05	0.00150497
chr9	85201011	85201411	401	4.12477	2.81223	4.80049	-1.78652	2.50641e-05	0.00151167
chr2	136356490	136356890	401	3.76012	2.1639	4.49933	-2.08612	2.51451e-05	0.00151526
chr8	144456611	144457011	401	5.42676	5.89791	4.72258	1.32563	2.51805e-05	0.0015161
chr18	31185534	31185934	401	3.80858	2.16832	4.55635	-2.08832	2.54538e-05	0.00153125
chr15	52261797	52262197	401	5.08	4.0128	5.68669	-1.46684	2.54835e-05	0.00153174
chr8	81557963	81558363	401	7.0324	6.04039	7.61469	-1.35086	2.56911e-05	0.00154291
chr1	203643171	203643571	401	4.82768	3.633	5.4721	-1.58424	2.57631e-05	0.00154592
chr17	51703466	51703866	401	3.91073	2.45507	4.62039	-1.93707	2.57915e-05	0.00154631
chr9	23962014	23962414	401	6.31525	5.35047	6.88827	-1.30665	2.58415e-05	0.00154799
chr3	45551535	45551935	401	5.50586	4.50664	6.09057	-1.37475	2.59115e-05	0.00155088
chr9	98146134	98146534	401	5.64058	4.6855	6.21026	-1.3261	2.59402e-05	0.00155128
chr7	51009937	51010337	401	3.88271	2.45937	4.58506	-1.93503	2.60482e-05	0.00155642
chr22	40043022	40043422	401	4.15271	2.9046	4.81172	-1.74515	2.63074e-05	0.00157059
chr6	155026441	155026841	401	5.48458	4.51216	6.06023	-1.35298	2.63817e-05	0.00157182
chr10	8628284	8628684	401	3.85862	2.32114	4.5859	-2.00295	2.63948e-05	0.00157182
chr3	178236789	178237189	401	3.85862	2.32114	4.5859	-2.00295	2.63948e-05	0.00157182
chrX	11446395	11446795	401	3.64597	1.99788	4.39524	-2.17384	2.64319e-05	0.00157271
chr2	19541048	19541448	401	5.71567	4.73219	6.29508	-1.3357	2.66824e-05	0.00158628
chr8	28657617	28658017	401	3.98223	2.57929	4.67987	-1.87652	2.68846e-05	0.00159696
chr1	234062173	234062573	401	4.61448	3.47525	5.24302	-1.5861	2.69259e-05	0.00159807
chr4	137961031	137961431	401	5.90631	4.94606	6.47778	-1.30994	2.69965e-05	0.00160089
chr8	94242055	94242455	401	5.44543	4.36221	6.0571	-1.43202	2.70187e-05	0.00160089
chr16	3183987	3184387	401	4.32305	4.86073	3.45624	1.63494	2.7088e-05	0.00160366
chr3	65582057	65582457	401	3.86212	2.31668	4.59105	-2.00301	2.7151e-05	0.00160604
chrX	17608817	17609217	401	4.86035	3.71775	5.48988	-1.54105	2.71873e-05	0.00160682
chr1	220967293	220967693	401	5.85702	4.89913	6.42767	-1.31045	2.72097e-05	0.00160682
chr1	93585057	93585457	401	5.42078	4.39769	6.01336	-1.38995	2.73229e-05	0.00161216
chr5	13624228	13624628	401	5.28376	4.20915	5.89275	-1.44132	2.73474e-05	0.00161227
chr14	96130917	96131317	401	3.64823	1.80166	4.43227	-2.29559	2.74818e-05	0.00161841
chr2	166072830	166073230	401	5.17912	4.11658	5.78434	-1.44741	2.74973e-05	0.00161841
chr3	67601417	67601817	401	4.00002	2.58493	4.70048	-1.87438	2.75668e-05	0.00162115
chrX	31221215	31221615	401	7.0098	6.04107	7.58419	-1.33579	2.76041e-05	0.001622
chr2	29113924	29114324	401	4.02236	2.70044	4.70043	-1.82205	2.77158e-05	0.00162721
chr7	18163088	18163488	401	4.54048	3.34008	5.1865	-1.62655	2.77688e-05	0.00162896
chr7	149558372	149558772	401	4.61115	3.32733	5.27953	-1.66594	2.78352e-05	0.00163151
chr1	85850222	85850622	401	5.99499	6.43464	5.35949	1.31211	2.80466e-05	0.00164254
chr12	74043341	74043741	401	6.17718	5.139	6.77465	-1.36895	2.81417e-05	0.00164674
chr2	214019221	214019621	401	5.99754	4.98546	6.5865	-1.3421	2.82361e-05	0.0016509
chr2	113283843	113284243	401	5.442	4.39377	6.04269	-1.40546	2.86431e-05	0.00167332
chr11	47937541	47937941	401	5.82055	4.86945	6.38883	-1.30434	2.8744e-05	0.00167782
chr16	55470607	55471007	401	4.45695	3.251	5.10451	-1.6387	2.88635e-05	0.00168232
chr5	146828328	146828728	401	3.67635	1.99539	4.43177	-2.16917	2.88829e-05	0.00168232
chr7	40899135	40899535	401	6.40405	5.48224	6.96198	-1.28297	2.88924e-05	0.00168232
chr2	158463650	158464050	401	3.70179	2.16883	4.42812	-2.0739	2.89644e-05	0.00168513
chr7	143248860	143249260	401	4.70335	3.51955	5.34472	-1.58735	2.90928e-05	0.00169121
chr9	116232483	116232883	401	6.41572	5.4952	6.97319	-1.28133	2.9149e-05	0.00169308
chr2	33791649	33792049	401	6.72506	5.76795	7.29543	-1.31075	2.92077e-05	0.00169388
chr2	15334678	15335078	401	4.32252	3.08675	4.97823	-1.68046	2.92105e-05	0.00169388
chr2	60416277	60416677	401	3.91018	2.45556	4.6196	-1.92735	2.92451e-05	0.00169449
chr3	46109213	46109613	401	4.44316	3.32181	5.06641	-1.60683	2.93703e-05	0.00170035
chr7	21543825	21544225	401	4.3639	3.18057	5.00513	-1.6503	2.94134e-05	0.00170145
chr12	59736820	59737220	401	5.12264	4.03864	5.73455	-1.47208	2.94471e-05	0.00170186
chr18	59917372	59917772	401	5.04668	3.99721	5.64776	-1.45671	2.94824e-05	0.00170186
chr9	108885851	108886251	401	4.12625	2.8109	4.80268	-1.77488	2.94926e-05	0.00170186
chr19	49664465	49664865	401	4.95795	5.45709	4.18847	1.43541	2.9522e-05	0.00170217
chr9	89519280	89519680	401	5.88246	4.87296	6.47057	-1.34245	2.95838e-05	0.0017037
chr10	103638097	103638497	401	4.17068	2.90611	4.83404	-1.73633	2.95967e-05	0.0017037
chr2	218857469	218857869	401	4.27539	2.98874	4.94451	-1.71407	2.97169e-05	0.00170923
chr10	35552975	35553375	401	4.0164	2.59272	4.71883	-1.86806	2.98024e-05	0.00171276
chr6	48141966	48142366	401	4.72025	3.4711	5.37954	-1.62956	2.98291e-05	0.00171289
chr2	65612645	65613045	401	4.48343	3.31326	5.12093	-1.61265	2.98691e-05	0.0017138
chr10	80413501	80413901	401	5.66261	4.66566	6.24656	-1.34566	2.99467e-05	0.00171686
chr1	59029760	59030160	401	6.01899	4.96952	6.62008	-1.37294	3.00432e-05	0.001721
chrX	31209314	31209714	401	7.49165	6.42945	8.09676	-1.40978	3.01199e-05	0.001724
chr11	111283935	111284335	401	6.2972	5.38629	6.8512	-1.27166	3.02185e-05	0.00172824
chr3	78736898	78737298	401	4.83672	3.5577	5.50386	-1.64434	3.0288e-05	0.00173082
chr8	127035640	127036040	401	5.94149	4.98366	6.51211	-1.30159	3.04682e-05	0.00173971
chr11	12076468	12076868	401	5.83638	4.86237	6.41257	-1.31857	3.0513e-05	0.00174087
chr11	7600287	7600687	401	5.85882	4.9001	6.42976	-1.30851	3.06125e-05	0.00174514
chr4	172826379	172826779	401	3.90406	2.46267	4.61051	-1.92101	3.07549e-05	0.00175184
chr1	113480294	113480694	401	5.54635	4.52441	6.13855	-1.37315	3.08371e-05	0.00175511
chr2	20235946	20236346	401	4.78067	3.64476	5.40823	-1.54516	3.10747e-05	0.00176721
chr11	13098039	13098439	401	5.18432	4.14959	5.78068	-1.42734	3.11106e-05	0.00176783
chr1	226762449	226762849	401	4.72702	3.58611	5.35606	-1.55575	3.12476e-05	0.00177419
chr2	219968707	219969107	401	5.64386	4.66858	6.22049	-1.32926	3.13426e-05	0.00177702
chr18	67425716	67426116	401	6.18969	5.2165	6.76561	-1.30566	3.13477e-05	0.00177702
chr4	181897851	181898251	401	5.36408	4.38506	5.94198	-1.36388	3.15113e-05	0.00178487
chr10	114825939	114826339	401	5.67241	4.66721	6.2591	-1.34729	3.16565e-05	0.00179029
chr12	29725903	29726303	401	5.17999	4.12832	5.78177	-1.44069	3.16577e-05	0.00179029
chr20	10849054	10849454	401	5.08214	3.99155	5.69607	-1.47037	3.17053e-05	0.00179155
chr1	51072099	51072499	401	4.41462	3.16275	5.07463	-1.66284	3.17364e-05	0.00179181
chr6	7729938	7730338	401	5.99767	5.11119	6.54271	-1.26203	3.17697e-05	0.00179181
chr10	78756784	78757184	401	4.82172	3.69842	5.44554	-1.53017	3.17858e-05	0.00179181
chr3	54356289	54356689	401	4.69608	3.57361	5.31966	-1.54787	3.19418e-05	0.00179917
chr6	78235306	78235706	401	5.39743	4.37864	5.9886	-1.38283	3.20293e-05	0.00180169
chr11	12418026	12418426	401	5.57879	4.60994	6.15322	-1.33044	3.20375e-05	0.00180169
chr10	35005897	35006297	401	5.44317	4.36541	6.05315	-1.42212	3.22442e-05	0.00181187
chrX	30957703	30958103	401	4.81087	3.71167	5.42744	-1.51955	3.23312e-05	0.00181519
chr12	55933192	55933592	401	4.3921	3.1702	5.04405	-1.65148	3.23546e-05	0.00181519
chr2	6506258	6506658	401	5.96521	4.95696	6.55291	-1.33292	3.24183e-05	0.00181733
chr1	47418701	47419101	401	5.04803	3.93351	5.66923	-1.49632	3.24604e-05	0.00181825
chrX	132119797	132120197	401	4.65702	3.46111	5.30178	-1.5957	3.25025e-05	0.00181916
chr7	131538400	131538800	401	5.51992	4.55808	6.09193	-1.33157	3.30484e-05	0.00184826
chr8	32432842	32433242	401	4.76747	3.52466	5.42507	-1.61476	3.32049e-05	0.00185554
chr14	64762010	64762410	401	4.63363	3.43285	5.27976	-1.5967	3.33377e-05	0.00186149
chr5	21152564	21152964	401	5.18387	4.05378	5.80972	-1.48935	3.35153e-05	0.00186993
chr8	75330326	75330726	401	5.51513	4.56542	6.08293	-1.32755	3.35563e-05	0.00187075
chr1	116334076	116334476	401	3.83781	2.31584	4.56184	-1.98521	3.36014e-05	0.00187178
chr4	23374341	23374741	401	4.59052	3.36254	5.24411	-1.61739	3.38392e-05	0.00188354
chr5	162683369	162683769	401	5.84269	4.88232	6.41419	-1.30282	3.39435e-05	0.00188787
chr3	8483298	8483698	401	4.24457	3.00384	4.90161	-1.6936	3.40195e-05	0.00189061
chr1	246608872	246609272	401	6.78968	5.86231	7.34959	-1.29436	3.40523e-05	0.00189094
chr11	93842383	93842783	401	4.44845	3.24079	5.09649	-1.62891	3.4126e-05	0.00189227
chr2	237695381	237695781	401	4.98952	3.93941	5.59081	-1.45751	3.41297e-05	0.00189227
chr1	89942954	89943354	401	6.37119	5.40019	6.94635	-1.30151	3.4283e-05	0.00189873
chr3	196169092	196169492	401	3.90628	2.5852	4.58413	-1.85833	3.42998e-05	0.00189873
chr1	111821085	111821485	401	4.05758	2.7107	4.74183	-1.8041	3.44742e-05	0.00190689
chr7	51376497	51376897	401	5.30676	4.16506	5.93602	-1.48532	3.46938e-05	0.00191754
chr6	146546451	146546851	401	5.90948	4.97468	6.47203	-1.28126	3.51417e-05	0.00193815
chr16	85363825	85364225	401	3.94939	2.58975	4.63673	-1.85219	3.51431e-05	0.00193815
chr5	100691555	100691955	401	5.14079	4.03959	5.75797	-1.46654	3.51489e-05	0.00193815
chr1	47934256	47934656	401	4.13434	2.80075	4.81531	-1.7666	3.52373e-05	0.00194063
chr9	27539694	27540094	401	5.19989	4.1558	5.79925	-1.42156	3.52683e-05	0.00194063
chr2	30026211	30026611	401	5.75588	4.78526	6.33092	-1.31342	3.52762e-05	0.00194063
chr4	68361180	68361580	401	6.32417	5.35969	6.89709	-1.29405	3.53122e-05	0.0019411
chr1	193905403	193905803	401	4.9702	3.91552	5.57294	-1.46393	3.54417e-05	0.00194671
chr5	126961695	126962095	401	5.60355	4.63859	6.17664	-1.32266	3.55346e-05	0.00195029
chr9	136978308	136978708	401	3.8589	4.46168	2.80407	1.81626	3.56423e-05	0.00195358
chr2	74845383	74845783	401	5.72403	4.82122	6.27508	-1.27663	3.56498e-05	0.00195358
chr14	55806983	55807383	401	4.69494	3.57469	5.31785	-1.54038	3.57826e-05	0.00195847
chr5	175494248	175494648	401	5.05097	3.92801	5.6747	-1.49281	3.58255e-05	0.00195847
chr10	119246950	119247350	401	5.46409	4.46077	6.05016	-1.36061	3.58272e-05	0.00195847
chr1	77473739	77474139	401	5.57361	4.5758	6.15785	-1.35315	3.58497e-05	0.00195847
chr8	65964670	65965070	401	3.99845	2.70165	4.67017	-1.80161	3.59274e-05	0.00196121
chr1	235067560	235067960	401	7.27763	6.29042	7.8583	-1.35148	3.59581e-05	0.00196136
chr16	59632222	59632622	401	4.32686	2.9926	5.00799	-1.71801	3.61007e-05	0.00196763
chr15	49831629	49832029	401	3.99827	2.58721	4.69779	-1.85336	3.62446e-05	0.00197395
chr5	10507537	10507937	401	7.1049	6.11747	7.68565	-1.33635	3.6465e-05	0.00198442
chr9	25917656	25918056	401	4.46557	3.18521	5.13306	-1.66658	3.67341e-05	0.00199753
chr1	240312898	240313298	401	4.1899	2.9068	4.8581	-1.72267	3.67974e-05	0.00199917
chr1	96560166	96560566	401	4.50551	3.1982	5.17991	-1.68115	3.68206e-05	0.00199917
chr18	6781155	6781555	401	4.39088	3.17179	5.04206	-1.64196	3.69583e-05	0.0020051
chr1	175840241	175840641	401	6.51718	5.56059	7.08737	-1.29221	3.71311e-05	0.00201293
chr1	197442046	197442446	401	6.7267	5.78616	7.29129	-1.29125	3.73126e-05	0.00202122
chr12	114759995	114760395	401	3.83366	2.32096	4.55573	-1.97462	3.75079e-05	0.00203025
chr1	61318286	61318686	401	6.47813	5.54169	7.04126	-1.27764	3.7765e-05	0.0020426
chr2	31558308	31558708	401	3.78278	2.32055	4.4939	-1.97275	3.78264e-05	0.00204436
chr1	192485737	192486137	401	6.12105	5.16154	6.69226	-1.28971	3.78829e-05	0.00204585
chr16	54657305	54657705	401	4.84373	3.64656	5.48885	-1.56867	3.80764e-05	0.00205473
chr15	91694493	91694893	401	5.09964	4.0563	5.69876	-1.43394	3.81922e-05	0.00205941
chr5	170745574	170745974	401	4.24921	3.0867	4.88452	-1.65299	3.82628e-05	0.00206023
chr11	78551083	78551483	401	4.61887	3.50201	5.24077	-1.54622	3.82656e-05	0.00206023
chr20	40563355	40563755	401	4.92736	3.8468	5.53821	-1.4788	3.82992e-05	0.00206047
chrX	109271037	109271437	401	5.15115	4.11346	5.74846	-1.42016	3.83458e-05	0.00206141
chr1	32703069	32703469	401	5.46229	4.4673	6.04558	-1.35479	3.85062e-05	0.00206846
chr16	55502778	55503178	401	4.47454	3.32328	5.10659	-1.59056	3.85682e-05	0.00207021
chr9	73643333	73643733	401	4.07234	2.69196	4.76467	-1.80426	3.86929e-05	0.00207534
chr1	106532075	106532475	401	3.12929	3.90498	1.33336	2.62196	3.92092e-05	0.00209779
chr1	175845350	175845750	401	4.89605	3.77089	5.52042	-1.50786	3.92121e-05	0.00209779
chr4	172776415	172776815	401	3.70363	2.1667	4.43079	-2.04898	3.92302e-05	0.00209779
chr8	37864291	37864691	401	3.70363	2.1667	4.43079	-2.04898	3.92302e-05	0.00209779
chr13	110527345	110527745	401	6.12416	5.19762	6.68378	-1.26653	3.9387e-05	0.00210395
chr1	228043462	228043862	401	4.6557	3.54288	5.2764	-1.54291	3.94048e-05	0.00210395
chr1	244289945	244290345	401	4.7383	3.64753	5.35229	-1.51437	3.95769e-05	0.00210981
chr15	73743044	73743444	401	4.92584	3.86408	5.53082	-1.46858	3.96183e-05	0.00210981
chr1	164794333	164794733	401	4.08446	2.8104	4.75032	-1.7495	3.96296e-05	0.00210981
chrX	44705853	44706253	401	4.78104	3.66167	5.4037	-1.52511	3.96513e-05	0.00210981
chr16	89289442	89289842	401	3.58437	4.24604	2.32624	2.02609	3.96637e-05	0.00210981
chr6	85472807	85473207	401	4.69733	3.50777	5.34032	-1.57451	3.97391e-05	0.00211223
chr1	106258181	106258581	401	2.71005	3.59694	0	3.61402	3.97903e-05	0.00211336
chr1	216293682	216294082	401	5.72585	4.76933	6.29602	-1.30039	3.99217e-05	0.00211876
chr2	57943329	57943729	401	4.78434	3.62041	5.42006	-1.54675	4.00892e-05	0.00212605
chr17	12133243	12133643	401	3.97692	2.70064	4.64335	-1.79404	4.01289e-05	0.00212656
chr2	138421835	138422235	401	5.31098	4.27464	5.90785	-1.39726	4.01858e-05	0.00212798
chr10	36280652	36281052	401	5.27471	4.20204	5.8831	-1.4246	4.04409e-05	0.00213989
chr4	92399033	92399433	401	3.92665	2.46484	4.63767	-1.90107	4.06561e-05	0.00214967
chr12	122841467	122841867	401	4.28194	3.00479	4.9486	-1.68929	4.07027e-05	0.00215053
chr19	17327873	17328273	401	3.4261	4.12925	1.99922	2.19639	4.08889e-05	0.00215875
chr2	43038351	43038751	401	4.68794	3.52153	5.32436	-1.56118	4.09221e-05	0.00215889
chr13	72180580	72180980	401	6.53904	5.62554	7.09398	-1.2649	4.13077e-05	0.00217761
chr1	116509054	116509454	401	6.31239	5.38517	6.87225	-1.26455	4.13465e-05	0.00217803
chr1	95742705	95743105	401	4.29789	3.09424	4.94481	-1.64926	4.14164e-05	0.00217847
chr11	36297212	36297612	401	4.29789	3.09424	4.94481	-1.64926	4.14164e-05	0.00217847
chr13	110347592	110347992	401	7.52989	6.52908	8.11512	-1.36262	4.15984e-05	0.00218642
chr4	166128424	166128824	401	4.19563	2.89909	4.86729	-1.71736	4.1951e-05	0.00220264
chr11	88410706	88411106	401	5.39417	4.38059	5.98363	-1.373	4.19693e-05	0.00220264
chr15	75145397	75145797	401	5.15579	4.13475	5.7477	-1.40667	4.22336e-05	0.0022138
chr3	14836021	14836421	401	3.95048	2.58907	4.63825	-1.83741	4.22446e-05	0.0022138
chr6	6699977	6700377	401	6.25741	5.33984	6.81382	-1.25775	4.26441e-05	0.00223131
chr12	52213480	52213880	401	4.47741	5.00621	3.63386	1.52501	4.26857e-05	0.00223131
chr1	218779404	218779804	401	5.05093	4.00581	5.65063	-1.43592	4.27016e-05	0.00223131
chr12	87440116	87440516	401	5.56772	4.57648	6.14975	-1.3361	4.27273e-05	0.00223131
chr12	38386228	38386628	401	6.27003	5.34479	6.82918	-1.2617	4.27364e-05	0.00223131
chr7	121020612	121021012	401	5.01836	3.8929	5.64283	-1.48859	4.30929e-05	0.00224827
chr8	88672821	88673221	401	3.97663	2.58578	4.67143	-1.83808	4.33221e-05	0.00225856
chr7	35249418	35249818	401	5.04212	4.00297	5.63991	-1.43246	4.34816e-05	0.00226349
chr1	237820639	237821039	401	4.86715	3.77563	5.48137	-1.49176	4.3504e-05	0.00226349
chr3	50627425	50627825	401	5.43519	4.4497	6.01528	-1.34813	4.35127e-05	0.00226349
chr8	128271566	128271966	401	4.72611	3.69209	5.32224	-1.48504	4.3591e-05	0.0022659
chr5	76999469	76999869	401	4.29351	3.01459	4.96063	-1.68455	4.37006e-05	0.00226993
chrX	130125162	130125562	401	5.3906	4.45124	5.95477	-1.32346	4.38145e-05	0.00227256
chr7	70788302	70788702	401	4.65569	3.50753	5.28685	-1.54917	4.38155e-05	0.00227256
chr2	219706882	219707282	401	5.33612	4.35039	5.91629	-1.35723	4.38494e-05	0.00227265
chr4	159078172	159078572	401	4.27236	2.99219	4.93981	-1.68626	4.39544e-05	0.00227643
chr12	71589590	71589990	401	4.88737	3.801	5.50002	-1.48136	4.40981e-05	0.0022822
chr19	15297353	15297753	401	4.10486	2.81179	4.77563	-1.74142	4.46409e-05	0.0023086
chr21	42684613	42685013	401	4.16259	2.91521	4.82141	-1.70242	4.46739e-05	0.00230862
chr4	174538823	174539223	401	5.1064	4.09019	5.69673	-1.40797	4.47928e-05	0.00231308
chr8	121724417	121724817	401	6.24273	5.3471	6.79116	-1.24703	4.49496e-05	0.00231885
chr1	165162872	165163272	401	3.99716	2.70309	4.66818	-1.78273	4.49824e-05	0.00231885
chr17	57305850	57306250	401	4.79102	3.64876	5.42045	-1.52926	4.50029e-05	0.00231885
chr8	73630416	73630816	401	4.79014	3.59158	5.43565	-1.56788	4.50863e-05	0.00232145
chr11	34640252	34640652	401	4.23802	2.98818	4.89749	-1.67705	4.51623e-05	0.00232367
chr3	176767377	176767777	401	7.6871	6.63236	8.28986	-1.40313	4.52997e-05	0.00232905
chr2	15191766	15192166	401	5.3382	4.37126	5.91198	-1.34652	4.53431e-05	0.00232959
chr8	121697368	121697768	401	6.10348	5.17152	6.66503	-1.26319	4.54565e-05	0.00233372
chr1	63920431	63920831	401	6.99513	6.02114	7.57132	-1.31596	4.55827e-05	0.0023385
chr21	16124530	16124930	401	4.99806	3.92524	5.6065	-1.45415	4.5688e-05	0.0023422
chr1	78038323	78038723	401	5.31719	4.37296	5.88308	-1.33803	4.57603e-05	0.00234421
chr6	46637162	46637562	401	5.02581	3.90377	5.64927	-1.49173	4.58781e-05	0.00234855
chr13	30829171	30829571	401	4.17256	2.80343	4.8622	-1.75724	4.59943e-05	0.00235239
chr3	146067066	146067466	401	5.83847	4.80549	6.43426	-1.34744	4.60196e-05	0.00235239
chr11	126373421	126373821	401	5.04737	3.98016	5.65406	-1.44402	4.63371e-05	0.00236691
chr5	111774499	111774899	401	3.12866	1.00017	3.95347	-2.76533	4.67379e-05	0.00238547
chr14	80434890	80435290	401	5.06967	3.96165	5.68891	-1.46824	4.67679e-05	0.00238547
chr8	116926805	116927205	401	5.16033	4.14174	5.75144	-1.39681	4.69947e-05	0.0023942
chr22	37457336	37457736	401	3.39316	4.08921	1.99697	2.21023	4.70069e-05	0.0023942
chrX	30895360	30895760	401	4.93929	3.79595	5.56904	-1.51488	4.72761e-05	0.00240618
chr16	2003844	2004244	401	4.934	5.42143	4.19235	1.40398	4.73632e-05	0.00240804
chr16	75376516	75376916	401	5.92033	5.03041	6.46664	-1.24422	4.73806e-05	0.00240804
chr2	39642328	39642728	401	4.43473	3.25845	5.07397	-1.59732	4.7627e-05	0.00241882
chr15	78065354	78065754	401	4.07127	2.80183	4.73592	-1.7361	4.77789e-05	0.0024248
chr1	193707398	193707798	401	5.79289	4.78087	6.38183	-1.33058	4.78732e-05	0.00242784
chr5	159511656	159512056	401	4.08826	2.80643	4.75613	-1.7357	4.80019e-05	0.00243262
chr2	145007261	145007661	401	5.14483	4.12202	5.73732	-1.40163	4.82865e-05	0.0024453
chr4	2255641	2256041	401	4.19043	2.99945	4.83383	-1.66258	4.84949e-05	0.00245409
chr5	39224177	39224577	401	5.59915	4.604	6.18249	-1.33124	4.85894e-05	0.0024558
chr11	128908523	128908923	401	5.31269	4.30901	5.89888	-1.36667	4.85982e-05	0.0024558
chr1	220631412	220631812	401	4.43069	3.24203	5.07343	-1.60017	4.86438e-05	0.00245636
chr6	55882646	55883046	401	5.5327	4.56428	6.10699	-1.31997	4.87012e-05	0.0024575
chr10	80509619	80510019	401	6.27145	5.34287	6.8318	-1.25974	4.90108e-05	0.00246944
chr8	37598438	37598838	401	4.5647	3.3994	5.2008	-1.56804	4.90184e-05	0.00246944
chr5	128782427	128782827	401	5.14607	4.13421	5.73497	-1.39527	4.90425e-05	0.00246944
chr5	54457148	54457548	401	5.13112	4.09778	5.72703	-1.40774	4.91449e-05	0.00247228
chr1	193408831	193409231	401	6.70143	5.77759	7.26008	-1.26947	4.91773e-05	0.00247228
chr4	127162761	127163161	401	6.16615	5.24131	6.72516	-1.25622	4.92039e-05	0.00247228
chr2	138275140	138275540	401	4.76725	3.70153	5.37347	-1.48334	4.94449e-05	0.00248263
chr6	30091764	30092164	401	4.48106	3.38775	5.09583	-1.54772	4.95035e-05	0.00248381
chr7	80481193	80481593	401	4.89583	3.80595	5.50954	-1.47697	4.95667e-05	0.00248522
chr3	120439950	120440350	401	3.64726	1.99585	4.39716	-2.12567	4.98632e-05	0.00249832
chr13	74047845	74048245	401	3.93314	2.58232	4.61834	-1.82498	5.01108e-05	0.00250894
chr6	165599694	165600094	401	5.19669	4.20032	5.78044	-1.37625	5.02381e-05	0.00251354
chr14	32561455	32561855	401	4.27121	2.99367	4.93796	-1.67631	5.04671e-05	0.00252321
chr11	101442039	101442439	401	4.2179	2.92243	4.88928	-1.70168	5.0537e-05	0.00252471
chr4	128606152	128606552	401	4.25377	2.92666	4.93313	-1.71132	5.05684e-05	0.00252471
chr5	28523891	28524291	401	5.14126	4.0016	5.76993	-1.48929	5.07299e-05	0.00253098
chr15	70427471	70427871	401	4.37605	3.24696	5.0016	-1.58319	5.08321e-05	0.0025343
chr3	115800428	115800828	401	6.79514	5.82854	7.3688	-1.29713	5.11913e-05	0.00254993
chr6	149170895	149171295	401	3.55368	2.00044	4.28422	-2.12385	5.12217e-05	0.00254993
chr8	13357328	13357728	401	5.09456	4.04936	5.69428	-1.42099	5.12537e-05	0.00254993
chr6	19723596	19723996	401	3.92807	2.58775	4.6107	-1.8216	5.14216e-05	0.00255503
chr1	27099572	27099972	401	4.00349	2.69657	4.67779	-1.77323	5.14451e-05	0.00255503
chr3	193885717	193886117	401	3.6439	2.1699	4.35762	-2.02959	5.14646e-05	0.00255503
chr13	97115420	97115820	401	4.06831	2.80499	4.73135	-1.72915	5.15626e-05	0.0025581
chr3	31093338	31093738	401	4.80875	3.64171	5.44536	-1.53623	5.2065e-05	0.00258121
chr20	6591276	6591676	401	6.36884	5.44169	6.92868	-1.25741	5.213e-05	0.00258169
chr10	73819529	73819929	401	5.16431	4.13732	5.75816	-1.39951	5.21475e-05	0.00258169
chr4	26235487	26235887	401	3.72405	2.17458	4.45381	-2.02382	5.22114e-05	0.00258304
chr11	31844319	31844719	401	4.24505	2.91128	4.92607	-1.71248	5.25087e-05	0.00259507
chrX	39813909	39814309	401	4.94671	3.93657	5.53503	-1.42008	5.2528e-05	0.00259507
chr4	22969382	22969782	401	5.28297	4.24654	5.87988	-1.38803	5.26903e-05	0.00260128
chrX	30621145	30621545	401	5.70242	4.75109	6.27079	-1.29502	5.28608e-05	0.00260787
chr6	160386833	160387233	401	5.41312	4.45104	5.98521	-1.3229	5.29229e-05	0.00260912
chr8	91180255	91180655	401	6.09003	5.20284	6.63533	-1.23212	5.30482e-05	0.00261348
chr19	46674806	46675206	401	3.19935	3.93704	1.61073	2.45126	5.3169e-05	0.0026176
chr9	27125126	27125526	401	5.21762	4.13176	5.83011	-1.43386	5.3345e-05	0.00262444
chr12	75446896	75447296	401	3.9574	2.5809	4.6488	-1.82136	5.38091e-05	0.00264543
chr2	120470265	120470665	401	5.51627	4.55373	6.08853	-1.31265	5.38625e-05	0.00264622
chr5	137622241	137622641	401	5.63632	4.62798	6.22405	-1.34168	5.44215e-05	0.00266938
chr1	155226890	155227290	401	5.71888	6.15254	5.09595	1.23141	5.44219e-05	0.00266938
chr7	30988641	30989041	401	4.02158	2.80767	4.67134	-1.72607	5.4447e-05	0.00266938
chr10	122140991	122141391	401	5.86343	4.94137	6.42145	-1.26037	5.4545e-05	0.00267115
chr10	106214258	106214658	401	5.2139	4.17787	5.81067	-1.39725	5.45587e-05	0.00267115
chr7	114530041	114530441	401	6.93725	5.98195	7.507	-1.29118	5.46324e-05	0.00267291
chr6	133062108	133062508	401	4.95506	3.83898	5.57673	-1.48102	5.47957e-05	0.00267809
chr9	133855855	133856255	401	4.68665	3.58478	5.30403	-1.50837	5.48141e-05	0.00267809
chr11	78030529	78030929	401	3.97536	2.70206	4.64102	-1.76693	5.49365e-05	0.00268222
chr6	88380068	88380468	401	4.19743	2.92335	4.86329	-1.69048	5.49906e-05	0.00268301
chr5	24831988	24832388	401	5.19455	4.24273	5.76308	-1.348	5.52221e-05	0.00269245
chr7	51324510	51324910	401	4.11569	2.90003	4.76592	-1.68606	5.52966e-05	0.00269422
chr10	119000700	119001100	401	4.13826	2.8964	4.79561	-1.68818	5.55809e-05	0.00270459
chr7	47361686	47362086	401	3.85875	2.45856	4.55574	-1.87386	5.55859e-05	0.00270459
chr15	74422936	74423336	401	5.92209	4.92391	6.50644	-1.3087	5.56878e-05	0.00270769
chr2	9179807	9180207	401	5.00982	3.93995	5.61734	-1.44246	5.57399e-05	0.00270836
chr1	218592654	218593054	401	4.89274	3.79271	5.50956	-1.47662	5.59821e-05	0.00271818
chr16	30856768	30857168	401	4.47085	3.32803	5.10044	-1.56314	5.60187e-05	0.00271818
chr8	125361636	125362036	401	3.99507	2.59186	4.69277	-1.81932	5.61311e-05	0.00272176
chr19	35405288	35405688	401	4.31044	3.10255	4.95853	-1.62786	5.63006e-05	0.00272811
chr3	131349902	131350302	401	6.14262	5.21001	6.7044	-1.25531	5.64759e-05	0.00273473
chr18	45166446	45166846	401	6.00614	5.06845	6.56972	-1.26192	5.65498e-05	0.00273644
chr7	129853676	129854076	401	4.15103	2.90534	4.80939	-1.68569	5.65949e-05	0.00273675
chr12	89390843	89391243	401	3.92776	2.46365	4.63929	-1.87755	5.66671e-05	0.00273837
chr3	179037314	179037714	401	7.10317	6.17068	7.66491	-1.29204	5.70317e-05	0.0027541
chr2	568002	568402	401	6.69976	5.79538	7.25139	-1.25413	5.72065e-05	0.00276055
chr3	138082503	138082903	401	4.68266	3.58981	5.29729	-1.50246	5.72432e-05	0.00276055
chr7	47571840	47572240	401	5.07529	4.0312	5.67466	-1.41598	5.73105e-05	0.00276191
chr7	155258170	155258570	401	6.0351	5.12672	6.58818	-1.24267	5.74852e-05	0.00276599
chr12	15601226	15601626	401	4.79768	3.60039	5.44284	-1.55654	5.7549e-05	0.00276599
chr1	212667469	212667869	401	6.1744	5.28617	6.72009	-1.23018	5.75614e-05	0.00276599
chr3	133547521	133547921	401	5.3205	4.38312	5.88397	-1.31848	5.76075e-05	0.00276599
chr3	159829542	159829942	401	5.3205	4.38312	5.88397	-1.31848	5.76075e-05	0.00276599
chr2	18047899	18048299	401	5.63035	4.67635	6.19965	-1.29194	5.76296e-05	0.00276599
chrX	67698152	67698552	401	3.97707	2.70063	4.64354	-1.76224	5.80919e-05	0.00278628
chr7	19958317	19958717	401	7.04426	6.059	7.62428	-1.31162	5.81766e-05	0.00278845
chr16	71520576	71520976	401	4.24626	3.00228	4.90417	-1.65639	5.82305e-05	0.00278915
chr12	82651468	82651868	401	4.42189	3.25367	5.05883	-1.58153	5.83358e-05	0.00279198
chr9	15401266	15401666	401	4.49325	3.37134	5.11667	-1.54297	5.83685e-05	0.00279198
chr1	65762201	65762601	401	6.32074	5.41122	6.87424	-1.2426	5.84112e-05	0.00279213
chr11	19028146	19028546	401	5.05327	3.95732	5.66885	-1.45485	5.86124e-05	0.00279986
chr13	84192113	84192513	401	4.83485	3.7162	5.45729	-1.49671	5.8878e-05	0.00281065
chr10	22816368	22816768	401	4.49874	3.31202	5.14094	-1.57589	5.90011e-05	0.00281463
chr9	6788079	6788479	401	3.80418	2.3259	4.51883	-1.93515	5.93804e-05	0.00282973
chr15	96053255	96053655	401	4.63191	3.56682	5.23793	-1.49278	5.93978e-05	0.00282973
chr10	106224690	106225090	401	5.59542	4.66817	6.15529	-1.27773	5.946e-05	0.00283079
chr9	20981421	20981821	401	5.08438	4.0488	5.68101	-1.40902	5.96145e-05	0.00283624
chr4	114015375	114015775	401	4.41711	3.15806	5.07903	-1.62866	5.98077e-05	0.00284352
chr12	38113999	38114399	401	4.82277	3.61924	5.46966	-1.55359	5.98537e-05	0.00284379
chr16	57643407	57643807	401	3.49329	1.80596	4.24989	-2.21915	6.02514e-05	0.00286077
chr15	50257850	50258250	401	4.07306	2.79897	4.73892	-1.71896	6.03089e-05	0.00286158
chr1	41515030	41515430	401	4.34839	3.24103	4.96744	-1.56852	6.03807e-05	0.00286307
chr11	92383385	92383785	401	5.14835	4.14512	5.73438	-1.38082	6.04636e-05	0.00286508
chr5	154141643	154142043	401	3.52362	2	4.248	-2.11328	6.05196e-05	0.00286581
chr1	89980626	89981026	401	5.28924	4.31663	5.86495	-1.34046	6.06943e-05	0.00287216
chr18	63071805	63072205	401	4.0231	2.69951	4.70158	-1.76095	6.07908e-05	0.0028748
chr1	62384642	62385042	401	4.45582	3.30521	5.08768	-1.5608	6.08536e-05	0.00287585
chr1	175820697	175821097	401	5.74864	4.79581	6.31753	-1.28093	6.11445e-05	0.00288767
chr3	194824674	194825074	401	3.75596	2.32084	4.46099	-1.93305	6.12459e-05	0.00289053
chr3	117548246	117548646	401	5.96241	5.0184	6.52821	-1.26554	6.12956e-05	0.00289094
chr1	103191331	103191731	401	6.10115	5.21249	6.64701	-1.22534	6.14902e-05	0.00289819
chr14	33679594	33679994	401	3.8074	2.32187	4.52363	-1.93411	6.15843e-05	0.00289926
chr10	17993402	17993802	401	4.16535	2.91283	4.82553	-1.67934	6.15949e-05	0.00289926
chr6	140436406	140436806	401	4.27111	3.10315	4.90798	-1.61423	6.1716e-05	0.00290142
chr4	186765102	186765502	401	5.96368	5.08403	6.50618	-1.22363	6.17227e-05	0.00290142
chr9	79165968	79166368	401	4.83601	3.80372	5.43158	-1.44132	6.18051e-05	0.00290336
chr22	25008704	25009104	401	3.02832	0.597962	3.88787	-3.01662	6.21972e-05	0.00291938
chr11	3124440	3124840	401	5.8259	4.92229	6.37725	-1.24367	6.22286e-05	0.00291938
chr10	90484576	90484976	401	5.03221	4.03216	5.61719	-1.39161	6.23521e-05	0.00292323
chr6	48962035	48962435	401	4.08946	2.80479	4.75806	-1.71635	6.251e-05	0.00292843
chr2	1653075	1653475	401	4.68871	3.4781	5.33755	-1.5718	6.25456e-05	0.00292843
chr3	21979703	21980103	401	5.18607	4.22869	5.75654	-1.34433	6.2638e-05	0.00293081
chr2	23268854	23269254	401	4.94482	3.9377	5.53215	-1.40858	6.28146e-05	0.00293713
chr16	75377962	75378362	401	5.18497	4.18855	5.76873	-1.366	6.32935e-05	0.00295536
chr3	53710121	53710521	401	3.78154	4.39385	2.69625	1.80389	6.32952e-05	0.00295536
chr1	98331167	98331567	401	4.87765	3.76244	5.49906	-1.48493	6.3348e-05	0.00295536
chr3	43770676	43771076	401	4.34306	3.24566	4.95908	-1.56361	6.33715e-05	0.00295536
chr15	51004146	51004546	401	4.69267	3.57636	5.31441	-1.50612	6.34731e-05	0.00295815
chr1	75708902	75709302	401	5.65916	4.74952	6.2127	-1.25672	6.38329e-05	0.00297296
chr8	43497135	43497535	401	4.63727	3.46931	5.27414	-1.54571	6.43031e-05	0.0029922
chr10	89916513	89916913	401	5.77548	4.82762	6.34264	-1.27634	6.43307e-05	0.0029922
chr11	123186358	123186758	401	5.54643	4.63087	6.10211	-1.27087	6.44659e-05	0.00299652
chr11	58867565	58867965	401	5.14028	4.08635	5.74277	-1.41041	6.46402e-05	0.00299964
chr9	37412666	37413066	401	5.14028	4.08635	5.74277	-1.41041	6.46402e-05	0.00299964
chr5	147310312	147310712	401	5.40423	4.51133	5.95165	-1.27851	6.46602e-05	0.00299964
chr9	4293380	4293780	401	5.40812	4.38721	5.99999	-1.36007	6.48567e-05	0.00300511
chr2	224360866	224361266	401	4.15633	2.8982	4.818	-1.67879	6.4863e-05	0.00300511
chrX	77442717	77443117	401	4.62513	3.46567	5.25956	-1.54065	6.51023e-05	0.00301245
chr5	171615218	171615618	401	4.33338	3.24064	4.94797	-1.56236	6.51066e-05	0.00301245
chr8	119177192	119177592	401	5.74304	4.85583	6.28836	-1.23804	6.53848e-05	0.00302334
chr11	8234105	8234505	401	6.3268	5.44232	6.87111	-1.2214	6.54619e-05	0.00302493
chr6	125511950	125512350	401	5.30167	4.36023	5.86657	-1.31764	6.57767e-05	0.00303749
chr1	147716918	147717318	401	3.95008	2.59021	4.63749	-1.80197	6.58736e-05	0.00303998
chr7	134613972	134614372	401	5.24934	4.20722	5.84808	-1.38881	6.61562e-05	0.00305103
chr1	222283284	222283684	401	4.31802	3.15252	4.95419	-1.59013	6.63056e-05	0.00305593
chr2	150681377	150681777	401	3.92653	2.4655	4.63738	-1.86509	6.63944e-05	0.00305803
chr9	71793740	71794140	401	4.88066	3.79236	5.4939	-1.46209	6.6482e-05	0.00305803
chr8	76955169	76955569	401	4.462	3.31856	5.09177	-1.55214	6.64836e-05	0.00305803
chr9	23556298	23556698	401	4.44446	3.3201	5.06861	-1.54663	6.65239e-05	0.00305803
chr15	101698286	101698686	401	3.7616	2.3144	4.46937	-1.92768	6.67761e-05	0.00306684
chr2	74696820	74697220	401	3.58694	1.99793	4.32471	-2.0984	6.68023e-05	0.00306684
chr5	126470544	126470944	401	4.93756	3.88063	5.54102	-1.4337	6.69537e-05	0.00307179
chr9	14251343	14251743	401	5.65924	4.7437	6.21491	-1.25776	6.72295e-05	0.00308245
chr4	177308124	177308524	401	5.47305	4.5094	6.04569	-1.30629	6.74032e-05	0.00308841
chr19	29099200	29099600	401	4.67048	3.52643	5.30044	-1.52355	6.75488e-05	0.00309081
chr5	128290120	128290520	401	4.67048	3.52643	5.30044	-1.52355	6.75488e-05	0.00309081
chr6	106872047	106872447	401	4.97126	3.89878	5.5796	-1.44049	6.75865e-05	0.00309081
chr7	139680766	139681166	401	4.06475	2.70239	4.75276	-1.75919	6.76667e-05	0.00309247
chr6	124506729	124507129	401	4.72442	3.62995	5.33955	-1.48507	6.77315e-05	0.00309344
chr7	112239179	112239579	401	6.14506	5.14904	6.72869	-1.30118	6.78007e-05	0.00309426
chr3	142501248	142501648	401	4.88114	3.75721	5.50515	-1.48686	6.7866e-05	0.00309426
chr6	48135679	48136079	401	5.89236	4.94096	6.46075	-1.26767	6.78806e-05	0.00309426
chr10	67116005	67116405	401	5.12791	4.11656	5.71664	-1.38012	6.79406e-05	0.00309499
chr2	75248570	75248970	401	4.13719	2.79553	4.82015	-1.72417	6.81203e-05	0.00310118
chr12	89067439	89067839	401	4.59395	3.42349	5.23153	-1.55187	6.85172e-05	0.00311725
chr3	41102108	41102508	401	6.08551	5.20409	6.62867	-1.2161	6.90017e-05	0.00313727
chrX	102959458	102959858	401	5.57895	4.5648	6.1686	-1.33639	6.92032e-05	0.00314441
chr10	44981193	44981593	401	5.63624	4.68961	6.20297	-1.27969	6.92972e-05	0.00314615
chr2	50444271	50444671	401	5.66358	4.75275	6.21755	-1.25334	6.93304e-05	0.00314615
chr12	15163280	15163680	401	3.92867	2.58743	4.61154	-1.79723	6.93934e-05	0.00314699
chr14	38839701	38840101	401	4.57774	3.38017	5.22298	-1.56366	6.94911e-05	0.00314803
chr2	65453948	65454348	401	4.08575	2.80957	4.75215	-1.70632	6.95054e-05	0.00314803
chr3	114144958	114145358	401	5.40362	4.45551	5.97087	-1.30458	6.9615e-05	0.00315098
chr5	155193028	155193428	401	4.09017	2.90476	4.732	-1.66582	6.98749e-05	0.00316072
chr7	129307972	129308372	401	5.33893	4.30146	5.93616	-1.37538	6.99932e-05	0.00316405
chr8	2034469	2034869	401	3.88226	2.58528	4.55402	-1.79746	7.01309e-05	0.00316825
chr6	7418222	7418622	401	4.06389	2.80992	4.72446	-1.70317	7.02453e-05	0.00317139
chr8	66344300	66344700	401	4.56282	3.33315	5.21687	-1.58834	7.03657e-05	0.00317364
chr3	105792276	105792676	401	5.89059	4.92132	6.46517	-1.28536	7.04231e-05	0.00317364
chr6	140462866	140463266	401	3.28997	1.31739	4.09337	-2.51501	7.04297e-05	0.00317364
chr1	88985063	88985463	401	6.80379	5.88135	7.36194	-1.25467	7.06336e-05	0.00318081
chr11	61551626	61552026	401	4.24752	3.0879	4.882	-1.60355	7.07541e-05	0.0031842
chr5	33370074	33370474	401	5.09574	4.11895	5.67288	-1.36244	7.09188e-05	0.00318959
chr1	244719838	244720238	401	4.7999	3.71018	5.41358	-1.46743	7.10289e-05	0.00319094
chr8	97918324	97918724	401	5.06812	3.98492	5.67978	-1.43847	7.10838e-05	0.00319094
chr7	92010253	92010653	401	5.19505	4.18723	5.78261	-1.36654	7.10842e-05	0.00319094
chrX	129678197	129678597	401	5.39234	4.44303	5.96	-1.30393	7.12421e-05	0.003196
chr8	89474184	89474584	401	6.83517	5.8877	7.40219	-1.27231	7.13898e-05	0.00320002
chr1	41493048	41493448	401	4.86641	3.72617	5.49524	-1.5002	7.14221e-05	0.00320002
chr4	150664928	150665328	401	3.77306	2.18176	4.51129	-2.00229	7.20864e-05	0.00322774
chr5	38830568	38830968	401	6.35657	5.43208	6.91545	-1.24176	7.21783e-05	0.00322981
chr6	14765077	14765477	401	3.35013	1.5899	4.11973	-2.34001	7.24284e-05	0.00323895
chr22	25169292	25169692	401	4.34268	3.16614	4.982	-1.58458	7.31061e-05	0.00326719
chr8	117650170	117650570	401	5.8714	4.92155	6.43925	-1.26463	7.34737e-05	0.00328155
chr1	84253915	84254315	401	5.3632	4.40041	5.93554	-1.32154	7.36292e-05	0.00328642
chr1	216626492	216626892	401	5.08693	4.08819	5.67147	-1.37495	7.40533e-05	0.00330326
chr3	172355922	172356322	401	3.64229	2.17126	4.35534	-1.99639	7.41101e-05	0.00330372
chr10	106226762	106227162	401	6.07507	5.15781	6.63136	-1.23522	7.41775e-05	0.00330464
chr8	98398498	98398898	401	5.95787	4.99367	6.53071	-1.27406	7.43238e-05	0.00330907
chr3	9141135	9141535	401	4.65523	3.54942	5.2738	-1.49342	7.43746e-05	0.00330925
chr9	38023996	38024396	401	4.17474	2.9948	4.81502	-1.62854	7.44569e-05	0.00331083
chr5	93359552	93359952	401	5.77572	4.84592	6.3365	-1.25522	7.48711e-05	0.00332715
chr2	10868958	10869358	401	4.77423	3.65458	5.39697	-1.49176	7.50452e-05	0.0033328
chr3	125003419	125003819	401	3.39055	1.58676	4.16756	-2.33512	7.59938e-05	0.00337281
chr1	220906895	220907295	401	5.3715	4.41879	5.94034	-1.30697	7.61027e-05	0.00337553
chr2	150166295	150166695	401	4.77638	3.76023	5.36668	-1.43184	7.70178e-05	0.00341397
chr11	94749354	94749754	401	5.72394	4.73103	6.30653	-1.30773	7.71383e-05	0.00341717
chr1	186715856	186716256	401	5.54016	4.58894	6.10849	-1.28612	7.71973e-05	0.00341765
chr8	131999212	131999612	401	3.25471	1.3161	4.05308	-2.50563	7.75512e-05	0.00343117
chr8	123530146	123530546	401	4.35471	3.25075	4.97272	-1.54756	7.76296e-05	0.00343249
chr13	79740940	79741340	401	4.19258	2.99663	4.83737	-1.62673	7.77313e-05	0.00343484
chr15	47727590	47727990	401	3.88605	2.58165	4.55971	-1.78848	7.80076e-05	0.00344431
chr18	3329864	3330264	401	3.99981	2.58525	4.70014	-1.79945	7.81535e-05	0.00344431
chr7	18165174	18165574	401	3.90884	2.58273	4.58795	-1.78808	7.81573e-05	0.00344431
chr7	124701968	124702368	401	5.73353	4.85957	6.27391	-1.22343	7.81661e-05	0.00344431
chr1	160309054	160309454	401	4.61086	3.46515	5.24129	-1.52374	7.8189e-05	0.00344431
chr5	83322447	83322847	401	3.46185	1.80519	4.21273	-2.19728	7.84744e-05	0.00345473
chr13	32984865	32985265	401	3.90404	2.46349	4.6103	-1.8497	7.8547e-05	0.00345577
chr1	244022261	244022661	401	5.65121	4.75466	6.19998	-1.24193	7.86335e-05	0.00345743
chr2	67895492	67895892	401	4.26607	3.08838	4.90571	-1.5983	7.86964e-05	0.00345805
chr16	79008059	79008459	401	2.80494	0.00120267	3.69774	-3.41309	7.8896e-05	0.00346407
chr8	29655432	29655832	401	4.04787	2.69538	4.73348	-1.74741	7.89406e-05	0.00346407
chr6	129744613	129745013	401	4.0213	2.70188	4.69875	-1.74	7.90176e-05	0.00346407
chr7	38584368	38584768	401	3.85374	2.46465	4.54813	-1.84329	7.90674e-05	0.00346407
chr21	18772401	18772801	401	5.26638	4.29556	5.84149	-1.3286	7.90784e-05	0.00346407
chr8	61805521	61805921	401	5.32147	4.29346	5.91565	-1.36232	7.9168e-05	0.00346585
chr6	165632172	165632572	401	4.96481	3.93962	5.55807	-1.40292	7.92962e-05	0.00346932
chr10	15856448	15856848	401	5.64951	4.79482	6.18259	-1.22132	7.94179e-05	0.00347041
chrX	23752707	23753107	401	4.60437	3.51783	5.21706	-1.48947	7.94218e-05	0.00347041
chr1	218481130	218481530	401	5.49434	4.61174	6.03795	-1.25066	7.94683e-05	0.00347041
chr3	149473680	149474080	401	5.53842	4.63413	6.09001	-1.25622	7.95623e-05	0.00347237
chr2	36731955	36732355	401	6.95471	6.04595	7.50794	-1.24972	7.96964e-05	0.00347608
chr16	85524911	85525311	401	4.11144	2.90362	4.75951	-1.65552	7.98277e-05	0.00347966
chr7	125735863	125736263	401	4.8534	3.77957	5.46215	-1.45159	7.99798e-05	0.00348209
chr10	22618213	22618613	401	4.82352	3.7677	5.42662	-1.44327	7.99819e-05	0.00348209
chr18	77165728	77166128	401	3.82851	2.46419	4.51699	-1.84199	8.00731e-05	0.00348392
chr18	57901852	57902252	401	5.29639	4.34219	5.86575	-1.31437	8.02001e-05	0.00348556
chr6	24902816	24903216	401	5.01056	3.90167	5.63007	-1.45198	8.02138e-05	0.00348556
chr7	24721657	24722057	401	4.94941	3.92917	5.54106	-1.40082	8.02586e-05	0.00348556
chr5	6704523	6704923	401	5.24756	4.23001	5.83832	-1.3696	8.03752e-05	0.00348732
chr7	98164089	98164489	401	6.41364	5.53872	6.95438	-1.20878	8.03977e-05	0.00348732
chr5	80736717	80737117	401	4.46948	3.28173	5.11196	-1.5685	8.05005e-05	0.00348964
chr9	86557177	86557577	401	5.85086	4.91431	6.41404	-1.25194	8.05657e-05	0.00349015
chr16	3182753	3183153	401	4.28268	4.79962	3.4694	1.52751	8.0611e-05	0.00349015
chr6	9248137	9248537	401	6.78615	5.87021	7.34197	-1.24714	8.07786e-05	0.00349527
chr5	148002439	148002839	401	5.07853	4.05349	5.67175	-1.38573	8.09254e-05	0.00349766
chr15	66763272	66763672	401	4.14887	3.00069	4.78003	-1.61983	8.09328e-05	0.00349766
chr8	141257544	141257944	401	6.08707	5.21741	6.62583	-1.20253	8.10575e-05	0.00350091
chr1	89719732	89720132	401	5.19868	5.64903	4.54037	1.31777	8.12097e-05	0.00350535
chr9	2502715	2503115	401	4.68225	3.5708	5.30252	-1.49021	8.13173e-05	0.00350785
chr3	50268886	50269286	401	4.97079	3.96308	5.55831	-1.38943	8.13803e-05	0.00350843
chr5	169629858	169630258	401	5.22046	4.20746	5.80973	-1.36238	8.15258e-05	0.00351256
chr8	61913454	61913854	401	4.96828	3.93427	5.5644	-1.40587	8.17096e-05	0.00351834
chr1	202056926	202057326	401	5.70766	4.87581	6.23192	-1.20454	8.18214e-05	0.00351942
chrX	20595923	20596323	401	3.73215	2.31766	4.43246	-1.90958	8.18479e-05	0.00351942
chr16	77123175	77123575	401	5.02999	4.00138	5.62437	-1.39316	8.19115e-05	0.00351942
chr7	79056008	79056408	401	4.17112	3.08836	4.78265	-1.5937	8.19338e-05	0.00351942
chr12	65892065	65892465	401	5.42683	4.39136	6.02343	-1.35889	8.23284e-05	0.00353423
chr2	207219977	207220377	401	4.40102	3.18278	5.05197	-1.59083	8.26473e-05	0.00354576
chr10	113362538	113362938	401	4.67053	3.64575	5.26366	-1.44912	8.26976e-05	0.00354577
chr18	58567403	58567803	401	4.32265	3.169	4.9554	-1.56974	8.30106e-05	0.00355704
chr2	180017817	180018217	401	4.39782	3.26284	5.02511	-1.54761	8.35442e-05	0.00357774
chr2	229488989	229489389	401	6.02271	5.11567	6.5753	-1.22363	8.37012e-05	0.00358229
chr6	5318659	5319059	401	3.95362	4.52161	3.00336	1.65749	8.40511e-05	0.00359509
chr21	15706666	15707066	401	4.61549	3.50154	5.23652	-1.49713	8.41161e-05	0.0035957
chr3	140117028	140117428	401	4.91515	3.87871	5.51206	-1.41235	8.41717e-05	0.0035959
chr1	88612746	88613146	401	7.24654	6.30177	7.81261	-1.28125	8.42701e-05	0.00359788
chr12	101894752	101895152	401	6.16221	5.31675	6.69175	-1.18933	8.43198e-05	0.00359788
chr7	126701005	126701405	401	5.17342	4.16465	5.7613	-1.36313	8.45524e-05	0.00360461
chr4	128387020	128387420	401	5.21262	4.28161	5.77383	-1.31146	8.45958e-05	0.00360461
chr18	50614816	50615216	401	4.52369	3.39214	5.14997	-1.52137	8.46303e-05	0.00360461
chr6	56387655	56388055	401	4.22551	3.06931	4.859	-1.59211	8.47614e-05	0.00360802
chr7	12456493	12456893	401	3.42654	1.8072	4.17028	-2.19225	8.50178e-05	0.00361676
chr3	86793758	86794158	401	5.11231	4.08168	5.70734	-1.3849	8.51925e-05	0.00362201
chr7	105680507	105680907	401	3.73503	2.31433	4.43678	-1.90699	8.52576e-05	0.0036226
chr8	48818307	48818707	401	4.21253	2.9958	4.86305	-1.62369	8.54333e-05	0.00362789
chr15	96234179	96234579	401	5.89773	5.01238	6.44236	-1.21377	8.56851e-05	0.00363527
chr1	190747276	190748036	761	4.57801	3.514	5.1837	-1.47763	8.57098e-05	0.00363527
chr14	81427535	81427935	401	4.43802	3.30622	5.06437	-1.53219	8.57645e-05	0.00363541
chr1	58824986	58825386	401	4.39263	3.32165	5.0005	-1.5182	8.62503e-05	0.00365209
chr3	101562329	101562729	401	4.19006	4.70103	3.39167	1.56877	8.62614e-05	0.00365209
chr6	117309573	117309973	401	4.1084	2.90703	4.75469	-1.64805	8.64992e-05	0.00365997
chr5	132103279	132103679	401	5.57857	4.65929	6.13559	-1.25705	8.65899e-05	0.00366162
chr7	98237457	98237857	401	4.66983	3.58849	5.28092	-1.47318	8.6675e-05	0.00366303
chr18	48580741	48581141	401	4.71616	3.58202	5.3432	-1.49814	8.73913e-05	0.0036911
chr7	55534276	55534676	401	6.02659	5.11032	6.58252	-1.22734	8.79154e-05	0.00370707
chr2	33426651	33427051	401	4.61211	3.52701	5.22435	-1.48249	8.79475e-05	0.00370707
chr1	237031418	237031818	401	4.3528	3.17664	4.99201	-1.5713	8.7975e-05	0.00370707
chr22	50027714	50028114	401	5.09223	4.10958	5.67136	-1.3587	8.79932e-05	0.00370707
chr5	158701406	158701806	401	4.85794	3.84228	5.44808	-1.40729	8.80723e-05	0.00370707
chr9	23841149	23841549	401	5.41065	4.47776	5.97254	-1.28273	8.81265e-05	0.00370707
chr20	23157705	23158105	401	4.74816	3.63375	5.36933	-1.4807	8.81364e-05	0.00370707
chrX	17553468	17553868	401	4.76432	3.68702	5.37416	-1.45526	8.8224e-05	0.00370855
chr6	148999691	149000091	401	3.9797	2.69754	4.64766	-1.72841	8.83568e-05	0.003711
chr11	7413989	7414389	401	4.74345	3.64126	5.36093	-1.48309	8.83872e-05	0.003711
chr13	89514653	89515053	401	6.40667	5.51608	6.95323	-1.21136	8.84911e-05	0.00371316
chr19	17332588	17332988	401	5.45214	5.89109	4.81815	1.2222	8.8855e-05	0.00372587
chr1	229070165	229070565	401	5.15813	4.17243	5.7383	-1.34835	8.89412e-05	0.00372587
chr9	77735458	77735858	401	4.56289	3.44782	5.18425	-1.50248	8.89519e-05	0.00372587
chr7	143367985	143368385	401	5.78749	4.92227	6.32457	-1.2078	8.90977e-05	0.00372977
chr1	232574924	232575324	401	5.7874	4.89342	6.33522	-1.22557	8.93059e-05	0.00373627
chr4	147597003	147597403	401	4.64763	3.51791	5.27337	-1.50081	8.97345e-05	0.00375198
chr3	37946009	37946409	401	6.08453	5.19168	6.63193	-1.21521	9.0102e-05	0.00376046
chr1	87392257	87392657	401	6.00824	5.12215	6.55314	-1.20777	9.01679e-05	0.00376046
chr10	72048496	72048896	401	3.35858	4.04775	1.99138	2.14944	9.01752e-05	0.00376046
chr20	57040884	57041284	401	3.96064	2.69335	4.62472	-1.72707	9.01791e-05	0.00376046
chr6	49514955	49515355	401	4.74918	3.59408	5.38235	-1.5091	9.0203e-05	0.00376046
chrX	48754279	48754679	401	4.7947	3.67995	5.41597	-1.47374	9.04943e-05	0.00377038
chr8	80366930	80367330	401	5.58764	4.73514	6.11989	-1.21803	9.06425e-05	0.00377299
chr1	226624622	226625022	401	5.11231	4.02104	5.72646	-1.42611	9.06634e-05	0.00377299
chr2	176897	177297	401	5.6927	4.75998	6.25452	-1.25434	9.07359e-05	0.00377378
chr6	100948673	100949073	401	6.47239	5.5999	7.01222	-1.2035	9.09292e-05	0.0037796
chr10	21194586	21194986	401	4.78786	3.763	5.38102	-1.42377	9.11661e-05	0.00378722
chr2	162582396	162582796	401	5.196	4.20015	5.77958	-1.34778	9.16406e-05	0.0038047
chr18	57712372	57712772	401	5.98961	5.12322	6.52714	-1.19692	9.17505e-05	0.00380703
chr4	44777120	44777520	401	3.69913	2.1716	4.42433	-1.97866	9.18638e-05	0.00380894
chr5	60092648	60093048	401	5.16679	4.08326	5.77855	-1.41923	9.19044e-05	0.00380894
chr8	73461624	73462024	401	4.82821	3.81316	5.41815	-1.41141	9.21625e-05	0.00381713
chr10	21335003	21335403	401	5.51606	4.63317	6.05978	-1.23976	9.22099e-05	0.00381713
chr4	74661751	74662151	401	4.98948	3.93568	5.59194	-1.41039	9.22641e-05	0.00381714
chr6	26311522	26311922	401	5.07737	5.5313	4.41132	1.32858	9.25445e-05	0.00382651
chr1	98326055	98326455	401	6.89911	5.99749	7.44973	-1.23581	9.3123e-05	0.00384818
chr10	76676218	76676618	401	4.54189	3.45592	5.15441	-1.48862	9.34815e-05	0.00386074
chr3	158471564	158471964	401	4.42097	3.32807	5.03562	-1.51487	9.36774e-05	0.00386549
chrX	43970125	43970525	401	4.00002	2.70041	4.67246	-1.72463	9.37347e-05	0.00386549
chr8	73407416	73407816	401	5.06017	4.06546	5.64336	-1.36246	9.37606e-05	0.00386549
chr1	209096109	209096509	401	6.44211	5.57989	6.97806	-1.19578	9.38467e-05	0.00386679
chr2	196821003	196821403	401	4.15032	2.90609	4.8083	-1.64755	9.42873e-05	0.00388268
chr22	41446694	41447094	401	5.67628	6.09671	5.08048	1.19474	9.4413e-05	0.0038856
chr6	65117722	65118122	401	3.70521	2.31784	4.39918	-1.89798	9.45115e-05	0.00388739
chr5	10317742	10318142	401	4.75227	3.70393	5.35299	-1.43837	9.46875e-05	0.00388808
chr11	8343023	8343423	401	5.31146	4.40501	5.86384	-1.28017	9.47436e-05	0.00388808
chr9	122778235	122778635	401	5.92272	5.01606	6.47518	-1.22351	9.4776e-05	0.00388808
chrX	86103074	86103474	401	3.85546	2.46273	4.5507	-1.82942	9.47848e-05	0.00388808
chr11	77107956	77108356	401	4.65369	3.59083	5.25902	-1.46075	9.48031e-05	0.00388808
chr1	97937892	97938292	401	6.17249	5.27505	6.72158	-1.21129	9.49412e-05	0.00389149
chr13	30991109	30991509	401	3.1479	0.982104	3.97746	-2.71499	9.50706e-05	0.00389454
chr20	33373754	33374154	401	4.80637	3.70196	5.42452	-1.46523	9.52005e-05	0.0038976
chr14	105091561	105091961	401	4.98822	4.01746	5.5633	-1.35872	9.54491e-05	0.00390423
chr7	17696441	17696841	401	5.46178	4.49346	6.03602	-1.29686	9.54729e-05	0.00390423
chr13	42134060	42134460	401	4.41732	3.23605	5.05798	-1.55507	9.55983e-05	0.00390681
chr10	90930398	90930798	401	6.52836	5.62982	7.07785	-1.21801	9.56463e-05	0.00390681
chr8	58195965	58196365	401	5.82315	4.89393	6.38372	-1.24144	9.58023e-05	0.00390884
chr6	52590559	52590959	401	4.9197	3.93381	5.49993	-1.3844	9.58064e-05	0.00390884
chr4	89765981	89766381	401	4.26122	3.17388	4.87416	-1.55005	9.68426e-05	0.00394883
chr12	87161078	87161478	401	4.35268	3.2533	4.9693	-1.52968	9.69112e-05	0.00394935
chr1	173527102	173527502	401	4.84544	3.78923	5.44867	-1.42664	9.717e-05	0.00395762
chr8	53344185	53344585	401	5.67952	4.79136	6.22519	-1.22271	9.74274e-05	0.00396582
chr2	33411749	33412149	401	5.52739	4.63862	6.07329	-1.2391	9.75945e-05	0.00397034
chr8	121999787	122000187	401	3.85853	2.4587	4.55544	-1.82869	9.78436e-05	0.00397685
chr9	73220266	73220666	401	5.05144	4.006	5.65123	-1.39692	9.78669e-05	0.00397685
chr4	41734338	41734738	401	3.49014	1.8093	4.24554	-2.17755	9.81045e-05	0.00398421
chr7	43568512	43568912	401	4.82095	3.73768	5.43264	-1.4526	9.83483e-05	0.00399182
chr9	70091555	70091955	401	4.11125	2.99932	4.73167	-1.6049	9.85723e-05	0.00399862
chr5	164327165	164327565	401	5.78934	4.9047	6.3337	-1.21415	9.86699e-05	0.00400029
chr21	27058953	27059353	401	3.80406	2.4628	4.48692	-1.82474	9.88152e-05	0.00400387
chr1	47650207	47650607	401	5.63543	4.6706	6.20847	-1.282	9.88831e-05	0.00400387
chr14	78253996	78254396	401	3.75026	2.32737	4.45251	-1.89071	9.89279e-05	0.00400387
chr19	4909868	4910268	401	4.73419	5.20904	4.02161	1.40922	9.90688e-05	0.00400727
chr6	10383409	10383809	401	6.74744	5.88308	7.2842	-1.20835	9.92002e-05	0.00401029
chr1	58592510	58592910	401	6.5811	5.6926	7.12689	-1.21385	9.94318e-05	0.00401736
chr9	22395831	22396231	401	5.28149	4.27679	5.86802	-1.34073	9.99748e-05	0.004037
chr2	182915497	182915897	401	3.99388	2.70835	4.66271	-1.71612	0.000100328	0.00404896
chr5	13251937	13252337	401	5.47034	4.51922	6.03863	-1.28303	0.000100567	0.00405626
chr18	34649050	34649450	401	4.26704	3.08712	4.90731	-1.58085	0.000101052	0.00407352
chr11	11992289	11992689	401	4.24745	3.08807	4.88185	-1.57631	0.000101125	0.00407414
chr6	72787584	72787984	401	5.25188	4.20286	5.85282	-1.37694	0.00010163	0.00409216
chr4	146567485	146567885	401	4.51804	3.40016	5.14024	-1.50453	0.000101721	0.00409347
chr14	77787459	77787859	401	4.28661	3.0857	4.93277	-1.58623	0.000101871	0.00409515
chr17	57440945	57441345	401	5.63061	4.74832	6.1741	-1.22163	0.000101878	0.00409515
chr2	224142312	224142712	401	5.01489	3.97741	5.61213	-1.39129	0.000102303	0.00410992
chr12	68240058	68240458	401	5.41755	4.47006	5.98457	-1.29555	0.00010254	0.00411709
chr1	162846808	162847208	401	5.58053	4.62213	6.15135	-1.27832	0.000102898	0.0041291
chr1	215539976	215540376	401	4.34198	3.3226	4.93335	-1.504	0.000103241	0.00413936
chr12	104177621	104178021	401	5.08569	4.17158	5.64085	-1.31387	0.000103271	0.00413936
chr1	216209986	216210386	401	4.283	3.09093	4.92669	-1.58211	0.00010346	0.00414463
chr10	44301098	44301498	401	7.0521	6.10183	7.62009	-1.26567	0.000103608	0.00414818
chr6	112330053	112330453	401	5.40155	4.45168	5.96941	-1.29046	0.000103993	0.00416125
chr14	79016810	79017210	401	4.54709	3.46915	5.15713	-1.47891	0.000104132	0.00416445
chr1	84583213	84583613	401	6.13715	5.32788	6.65248	-1.16688	0.000104282	0.00416693
chr3	23646490	23646890	401	5.01886	4.01772	5.6042	-1.36619	0.000104312	0.00416693
chr7	66051056	66051456	401	5.59337	4.67098	6.15151	-1.25018	0.000104918	0.00418879
chr12	47377540	47377940	401	4.7483	3.67075	5.35821	-1.44634	0.000105257	0.00419995
chr8	141624974	141625374	401	3.60892	2.17405	4.31389	-1.96766	0.000105408	0.00420362
chr6	82951375	82951775	401	4.30471	3.16874	4.93229	-1.54841	0.000105623	0.0042098
chr11	83092779	83093179	401	4.69085	3.57834	5.31145	-1.47635	0.000105919	0.00421748
chr18	34911972	34912372	401	4.91786	3.84087	5.5276	-1.42792	0.000105935	0.00421748
chr13	110528395	110528795	401	4.67708	3.638	5.27484	-1.43651	0.000106266	0.00422828
chr13	75788633	75789033	401	6.21938	5.3877	6.74357	-1.17147	0.00010666	0.00424157
chr1	115210357	115210757	401	6.44573	5.54144	6.99732	-1.21611	0.000106838	0.00424627
chr2	30666490	30666890	401	5.13125	4.19276	5.69512	-1.31883	0.000107113	0.0042548
chr10	106424074	106424474	401	6.11864	5.21696	6.66929	-1.20816	0.000107222	0.00425675
chr13	100347932	100348332	401	3.61884	2.16613	4.32784	-1.96523	0.000107559	0.00426774
chr6	87794924	87795324	401	3.43404	1.80045	4.18054	-2.17175	0.000107744	0.00427076
chr6	106135269	106135669	401	5.92037	5.07235	6.4509	-1.18412	0.000107768	0.00427076
chr1	84539943	84540343	401	4.40473	3.25467	5.03643	-1.53494	0.000107816	0.00427076
chr4	74230873	74231273	401	5.13384	4.12222	5.72266	-1.3584	0.000108351	0.00428952
chr3	102483564	102483964	401	4.11758	2.92126	4.76246	-1.62744	0.000108415	0.00428968
chr17	66980153	66980553	401	4.1068	2.90899	4.7521	-1.62901	0.000108826	0.00430354
chr11	95245048	95245448	401	5.71298	4.81317	6.26293	-1.22301	0.00010908	0.00431114
chr8	56405204	56405604	401	4.21393	2.99348	4.86548	-1.60723	0.00010949	0.00432497
chr7	2956697	2957097	401	4.18707	3.00361	4.82834	-1.59773	0.000109631	0.00432811
chr3	56926712	56927112	401	4.5006	3.40213	5.11694	-1.49221	0.000110425	0.0043561
chr7	12737106	12737506	401	5.36637	4.45571	5.92028	-1.2634	0.000110463	0.0043561
chr6	25175219	25175619	401	5.88711	5.00881	6.42911	-1.1984	0.000110553	0.00435722
chr5	154604096	154604496	401	6.65887	5.78942	7.19755	-1.19909	0.000110735	0.00436078
chr12	71397400	71397800	401	4.20713	3.00327	4.85411	-1.60108	0.000110767	0.00436078
chr7	7733001	7733401	401	5.18124	4.21731	5.75398	-1.3188	0.000110998	0.00436743
chr5	139745363	139745763	401	5.93039	5.05055	6.47297	-1.19736	0.000111166	0.00437164
chr5	14880535	14880935	401	5.22047	4.2227	5.80469	-1.3393	0.000111556	0.00438452
chr2	6372525	6372925	401	5.08955	4.07386	5.67971	-1.36821	0.000112137	0.00440492
chr1	201299881	201300281	401	4.49725	3.40638	5.11127	-1.48871	0.00011225	0.00440689
chr1	87423775	87424175	401	5.25932	4.2967	5.83161	-1.31046	0.000112465	0.0044129
chr4	53702619	53703019	401	4.71117	3.62805	5.32281	-1.45166	0.00011254	0.00441316
chr9	121326241	121326641	401	4.32061	3.24912	4.92863	-1.51495	0.000112596	0.00441316
chr1	99457599	99457999	401	7.37041	6.41358	7.94069	-1.28156	0.000112673	0.00441372
chr1	64077194	64077594	401	4.3688	3.25596	4.98949	-1.52075	0.000112886	0.00441884
chrX	56503954	56504354	401	5.26507	4.26585	5.84977	-1.33534	0.000112958	0.00441884
chr5	128227984	128228384	401	4.93858	3.91267	5.53208	-1.39052	0.000112991	0.00441884
chr17	77477430	77477830	401	4.94786	3.91637	5.54316	-1.3932	0.000113154	0.00442277
chr1	175841669	175842069	401	5.06048	4.09308	5.63442	-1.336	0.000113439	0.00443145
chr2	157692740	157693140	401	5.34364	4.34512	5.92811	-1.32705	0.00011359	0.00443467
chr11	58770741	58771141	401	5.73546	4.76263	6.31126	-1.27797	0.000113647	0.00443467
chr7	121084746	121085146	401	5.24894	4.21593	5.84474	-1.36438	0.000113812	0.00443865
chr3	177744872	177745272	401	5.15717	4.18376	5.73316	-1.32663	0.000114173	0.00444879
chr9	127916916	127917316	401	5.89625	6.30449	5.32479	1.16751	0.000114197	0.00444879
chr7	92306117	92306517	401	4.24943	3.08544	4.88516	-1.56832	0.000114446	0.00445533
chr8	133212206	133212606	401	6.27416	5.40055	6.81441	-1.19317	0.000114491	0.00445533
chr3	133437823	133438223	401	4.65921	3.62469	5.2555	-1.43073	0.000114788	0.00446441
chr10	112202599	112202999	401	3.61567	2.16904	4.32331	-1.95878	0.000114998	0.00447012
chr3	98013501	98013901	401	4.17801	2.98922	4.82078	-1.59709	0.000115089	0.00447057
chr10	62384102	62384502	401	5.03936	4.00082	5.63695	-1.38269	0.000115135	0.00447057
chr15	92011536	92011936	401	6.12938	5.21077	6.68616	-1.21959	0.000115702	0.00448765
chrX	105635845	105636245	401	4.91518	3.94423	5.49033	-1.35994	0.000115702	0.00448765
chr15	35000480	35000880	401	5.30593	4.24421	5.9109	-1.37817	0.000116269	0.00450424
chr15	92385098	92385498	401	4.77938	3.66181	5.40149	-1.46346	0.000116318	0.00450424
chr7	34321257	34321657	401	5.91619	5.05539	6.45159	-1.18476	0.000116327	0.00450424
chr17	8121553	8121953	401	5.10556	5.55333	4.45281	1.29109	0.000116442	0.00450424
chr1	232767369	232767769	401	5.60418	4.73514	6.1427	-1.21679	0.000116448	0.00450424
chr4	45946861	45947261	401	4.97439	3.98832	5.55468	-1.35852	0.000116581	0.0045069
chr11	128467542	128467942	401	3.86483	2.44969	4.5653	-1.81968	0.000116693	0.00450701
chr5	10289114	10289514	401	4.50402	3.46347	5.10225	-1.46135	0.000116711	0.00450701
chr3	67593838	67594238	401	4.28222	3.17357	4.90165	-1.53521	0.000117534	0.00453385
chr18	39825522	39825922	401	4.34986	3.1813	4.98691	-1.54909	0.000117557	0.00453385
chr5	14061077	14061477	401	3.7602	4.33437	2.79211	1.74258	0.000117598	0.00453385
chr5	123997669	123998069	401	4.418	3.26038	5.05189	-1.53178	0.000118009	0.00454517
chr12	122917502	122917902	401	4.88715	3.88429	5.47306	-1.37882	0.00011802	0.00454517
chr5	34524145	34524545	401	4.99757	4.0185	5.57549	-1.35383	0.000118585	0.00456442
chr8	122686960	122687360	401	4.36605	3.23624	4.99181	-1.52273	0.000118829	0.00457031
chrX	139881068	139881468	401	4.50667	3.39395	5.12733	-1.49255	0.000119024	0.00457031
chr5	151063180	151063580	401	4.34642	3.18615	4.98108	-1.54536	0.000119025	0.00457031
chr7	35003738	35004138	401	7.23893	6.30965	7.79954	-1.2544	0.000119046	0.00457031
chr3	36648600	36649000	401	6.11193	5.23179	6.65462	-1.193	0.000119097	0.00457031
chr1	117821727	117822127	401	4.86172	3.82014	5.46028	-1.40803	0.000119125	0.00457031
chr8	47941833	47942233	401	3.13154	0.997822	3.95702	-2.68263	0.000119649	0.00458791
chr2	121574049	121574449	401	4.99059	3.98046	5.57891	-1.36876	0.00011994	0.00459659
chr18	27922008	27922408	401	5.61953	4.73173	6.16507	-1.2199	0.000120522	0.00461636
chr3	25455465	25455865	401	5.15418	4.2297	5.71306	-1.29634	0.000120736	0.00461835
chr5	132225533	132225933	401	3.95671	2.69742	4.61869	-1.70155	0.000120767	0.00461835
chr2	209499031	209499431	401	4.9775	3.98355	5.56044	-1.3604	0.000120769	0.00461835
chr2	171347588	171347988	401	3.51713	2.00512	4.23906	-2.04747	0.000120888	0.0046204
chr9	109766353	109766753	401	5.3667	4.43873	5.92683	-1.27211	0.000120962	0.00462074
chr4	105495327	105495727	401	4.30578	3.11197	4.94997	-1.57051	0.000121271	0.00463003
chr5	107553046	107553446	401	4.21188	3.08471	4.83686	-1.55799	0.000121351	0.00463058
chr11	38089661	38090061	401	5.93465	5.0756	6.46939	-1.18085	0.000121874	0.00464804
chr9	2478423	2478823	401	5.09899	4.06913	5.69377	-1.36909	0.000121969	0.00464913
chr6	75458881	75459281	401	5.20128	4.24557	5.77118	-1.30808	0.00012228	0.00465848
chr6	38240052	38240452	401	3.83771	2.45299	4.53106	-1.81098	0.000122407	0.0046597
chr19	4007422	4007822	401	5.17998	5.63022	4.52193	1.2503	0.00012249	0.0046597
chr17	56440368	56440768	401	4.74176	3.70004	5.34036	-1.42057	0.000122509	0.0046597
chr11	44978767	44979167	401	4.74756	3.74765	5.33249	-1.39733	0.000122701	0.00466447
chr12	106126499	106126899	401	4.15626	2.92677	4.81026	-1.62215	0.000122813	0.00466625
chr3	4575409	4575809	401	4.4346	3.30997	5.05882	-1.50573	0.000122949	0.00466889
chr1	182397769	182398169	401	4.92293	3.91466	5.51064	-1.37386	0.000123041	0.00466988
chr12	101949807	101950207	401	4.54195	3.52071	5.13393	-1.44174	0.000123211	0.00467383
chr12	131111999	131112399	401	3.95176	2.58855	4.63997	-1.75475	0.000123322	0.00467552
chr7	158802763	158803163	401	5.01573	4.00417	5.60452	-1.36402	0.000123463	0.00467809
chr2	95315984	95316384	401	4.77788	3.70573	5.38611	-1.4344	0.000123572	0.00467809
chr11	102869424	102869824	401	4.33717	3.22862	4.95658	-1.51535	0.000123588	0.00467809
chr3	42819811	42820211	401	4.04312	2.80901	4.69837	-1.65635	0.000123955	0.00468947
chr3	107236922	107237322	401	5.3266	4.38524	5.89147	-1.28251	0.0001242	0.00469622
chr8	96927024	96927424	401	3.80774	2.45897	4.49245	-1.80564	0.000124346	0.00469923
chr2	184554827	184555227	401	4.33764	3.17318	4.9735	-1.54416	0.000124567	0.00470507
chr4	73740367	73740767	401	4.56464	3.51066	5.16716	-1.44955	0.000124678	0.00470676
chr14	81247094	81247494	401	4.57329	3.47648	5.18913	-1.47423	0.000125013	0.00471249
chr10	79162864	79163264	401	5.37843	4.44083	5.94197	-1.27316	0.000125043	0.00471249
chr17	69269451	69269851	401	5.86153	5.00789	6.39421	-1.18047	0.000125045	0.00471249
chr5	174336000	174336400	401	4.2128	2.99503	4.86361	-1.59691	0.000125096	0.00471249
chr22	37161401	37161801	401	3.9303	4.49022	3.00289	1.62377	0.000125235	0.00471522
chr15	77994041	77994441	401	6.25041	5.37605	6.79094	-1.18379	0.000125922	0.00473854
chr3	187016955	187017355	401	4.37383	3.24961	4.99793	-1.5158	0.000126715	0.00476352
chr9	17614923	17615323	401	5.75836	4.87275	6.30309	-1.20325	0.00012672	0.00476352
chr6	21738401	21738801	401	4.56457	3.52978	5.16094	-1.44248	0.000126976	0.00476985
chr2	28360936	28361336	401	4.73768	3.68647	5.33931	-1.42288	0.00012712	0.00476985
chr4	121053712	121054112	401	3.97746	2.70021	4.64414	-1.6981	0.000127148	0.00476985
chr6	10248369	10248769	401	4.57747	3.51327	5.18322	-1.45154	0.000127284	0.00476985
chr19	45615980	45616380	401	5.1894	5.63826	4.53432	1.24497	0.000127288	0.00476985
chrX	123083890	123084290	401	5.6186	4.7011	6.17498	-1.23438	0.000127293	0.00476985
chrX	139739114	139739514	401	4.11702	2.8264	4.78716	-1.66192	0.000127394	0.00477111
chr9	127721445	127721845	401	4.5824	3.57205	5.17079	-1.42655	0.000127616	0.0047769
chr1	84156245	84156645	401	5.85445	4.98285	6.39394	-1.19169	0.000127851	0.00478317
chr1	84062486	84062886	401	4.6946	3.65185	5.29354	-1.42613	0.000127966	0.00478491
chr9	69131679	69132079	401	4.37052	3.25407	4.9923	-1.51255	0.000128262	0.00479345
chr13	49052784	49053184	401	4.81104	3.81869	5.39345	-1.38346	0.000128345	0.00479402
chr3	104510435	104510835	401	3.51377	2.00772	4.23442	-2.04153	0.000129211	0.00482384
chr4	47374495	47374895	401	6.09232	5.19772	6.64036	-1.1957	0.000129839	0.00484219
chr10	121078713	121079113	401	6.59941	5.75576	7.12825	-1.17714	0.000129893	0.00484219
chr11	96207398	96207798	401	6.20394	5.2909	6.75871	-1.20868	0.000129908	0.00484219
chr5	112338656	112339056	401	5.13689	4.21279	5.69564	-1.29637	0.000130012	0.00484352
chr6	89035443	89035843	401	6.75962	5.87869	7.3026	-1.20419	0.00013011	0.00484461
chr15	55969552	55969952	401	2.95552	0.583919	3.80893	-2.95582	0.000130269	0.00484798
chr20	31610613	31611013	401	6.5306	5.67935	7.06236	-1.17681	0.000130414	0.00485083
chr4	120801347	120801747	401	4.05781	2.91363	4.6878	-1.61204	0.000130842	0.00486421
chr2	217653223	217653623	401	5.07142	4.0953	5.64833	-1.33502	0.000131137	0.0048726
chr5	10301798	10302198	401	6.84268	5.9601	7.38628	-1.20489	0.000132044	0.00490374
chr20	34190565	34190965	401	3.04631	3.80914	1.32457	2.51116	0.00013259	0.0049214
chr2	86072326	86072726	401	3.00045	0.994913	3.8086	-2.69207	0.000132865	0.00492903
chr12	41981768	41982168	401	5.51666	4.65305	6.05314	-1.21245	0.000133114	0.00493443
chr8	136296438	136296838	401	4.23301	3.16698	4.83932	-1.52293	0.00013315	0.00493443
chr1	246503316	246503716	401	4.89669	3.85511	5.49526	-1.39619	0.000133721	0.00495301
chr16	24286868	24287268	401	4.26173	3.15364	4.881	-1.52743	0.000133898	0.00495697
chr1	151300897	151301297	401	3.58462	4.20806	2.46265	1.85492	0.000133992	0.00495784
chr11	14902661	14903061	401	5.60314	4.70325	6.15313	-1.22165	0.000134244	0.00496456
chr11	96156964	96157364	401	5.34607	4.38809	5.91675	-1.28639	0.000134885	0.00498567
chr5	34487274	34487674	401	5.03866	4.00914	5.63333	-1.37278	0.000135091	0.00499067
chr2	634608	635008	401	6.26988	5.39442	6.81081	-1.18109	0.000135171	0.00499103
chrX	57737771	57738171	401	4.44564	3.36705	5.05588	-1.47362	0.000135337	0.00499456
chr2	10265827	10266227	401	3.85201	2.59063	4.51454	-1.73997	0.000135638	0.00500109
chr10	110916522	110916922	401	6.27079	5.41024	6.80611	-1.17227	0.000135656	0.00500109
chr16	83344003	83344403	401	5.65512	4.7751	6.19777	-1.20584	0.000135784	0.00500321
chr14	55780297	55780697	401	4.75328	3.73927	5.34288	-1.39612	0.000136042	0.00501012
chr12	79726029	79726429	401	4.46084	3.3905	5.06851	-1.46934	0.000136192	0.00501303
chr8	106191712	106192112	401	3.64143	2.17275	4.35398	-1.94228	0.000136342	0.00501595
chr12	78928483	78928883	401	3.9115	2.69636	4.56159	-1.69101	0.000136687	0.00502603
chr12	128178873	128179273	401	4.47925	3.36314	5.10093	-1.4857	0.000137071	0.00503751
chr19	11505083	11505483	401	6.47678	6.88076	5.91369	1.1706	0.000137275	0.00504089
chr17	55448715	55449115	401	3.78315	2.45751	4.46215	-1.79731	0.000137305	0.00504089
chr3	41148335	41148735	401	4.98687	4.01779	5.56138	-1.34131	0.000137915	0.00506063
chr3	160885886	160886286	401	4.26984	3.1663	4.88773	-1.52225	0.000138616	0.00508375
chr2	53594229	53594629	401	4.62383	3.55254	5.2318	-1.44929	0.000138927	0.0050925
chr1	183080285	183080685	401	3.95873	2.69461	4.62198	-1.69077	0.000139312	0.00510232
chr11	130190261	130190661	401	5.49628	4.63812	6.03069	-1.20815	0.000139339	0.00510232
chr5	115343965	115344365	401	4.34007	3.16959	4.97766	-1.53866	0.000139798	0.00511439
chr1	116290260	116290660	401	5.76323	4.85753	6.31533	-1.2133	0.000139813	0.00511439
chr18	49690319	49690719	401	3.99706	2.70465	4.66765	-1.69144	0.000140109	0.00512256
chr1	211613355	211613755	401	6.21938	5.38485	6.74467	-1.1584	0.000140543	0.00513576
chrX	110394636	110395036	401	4.76239	3.67396	5.37567	-1.44283	0.000140633	0.00513641
chr12	89160703	89161103	401	4.67057	3.64627	5.26354	-1.41338	0.00014072	0.00513694
chr2	38685100	38685500	401	5.06742	4.10095	5.64103	-1.32667	0.000140849	0.00513898
chr11	84817994	84818394	401	6.38137	5.48482	6.93014	-1.19469	0.000141114	0.005146
chr3	27677579	27677979	401	5.98331	5.14777	6.509	-1.15947	0.000141432	0.00515493
chr15	67886740	67887140	401	3.17822	1.31683	3.96464	-2.45158	0.000141581	0.00515516
chr1	176494487	176494887	401	4.02724	2.90455	4.65088	-1.60703	0.000141612	0.00515516
chr6	155782336	155782736	401	5.03626	4.09767	5.60016	-1.31521	0.000141661	0.00515516
chr11	57733299	57733699	401	5.59569	4.69126	6.14734	-1.22657	0.000141729	0.00515516
chr8	58850224	58850624	401	6.25348	5.37366	6.79605	-1.18487	0.000141836	0.00515637
chr2	224909979	224910379	401	5.48236	4.64828	6.00748	-1.19786	0.000141997	0.00515958
chr6	56224002	56224402	401	4.10872	2.80705	4.78168	-1.66011	0.000142123	0.00516153
chr18	7830450	7830850	401	3.32351	4.00442	1.99019	2.11415	0.00014242	0.00516966
chr19	8347736	8348136	401	3.75826	4.33023	2.79653	1.71661	0.000142881	0.00518373
chr3	9079810	9080210	401	4.45933	3.29986	5.09376	-1.52113	0.000143021	0.00518613
chr4	172998670	172999070	401	4.82938	3.81237	5.41996	-1.38649	0.000143187	0.00518831
chr5	93433381	93433781	401	4.19091	2.99843	4.83472	-1.58022	0.000143267	0.00518831
chr1	51558304	51558704	401	5.98666	5.10752	6.52898	-1.18357	0.000143301	0.00518831
chr1	198125981	198126381	401	6.63139	5.74991	7.17458	-1.19138	0.000143537	0.00519422
chr8	57000246	57000646	401	3.75198	2.46157	4.42207	-1.79489	0.000143635	0.00519508
chrX	133726137	133726537	401	5.60844	4.67953	6.16891	-1.24342	0.000143857	0.00519571
chr14	104732443	104733190	748	4.54653	3.51465	5.14196	-1.4331	0.000143883	0.00519571
chr7	47482117	47482517	401	4.82725	3.76372	5.43278	-1.41584	0.000143893	0.00519571
chr8	42720341	42720741	401	5.83986	4.93148	6.39294	-1.21047	0.000143946	0.00519571
chr2	196232946	196233346	401	4.50755	3.45974	5.10811	-1.44753	0.000144364	0.00520813
chr18	770484	770884	401	3.97656	2.70142	4.64269	-1.68731	0.000144553	0.00521229
chr14	89137506	89137906	401	4.73302	3.67244	5.33762	-1.42042	0.000144874	0.00522122
chr15	62075886	62076286	401	4.73607	3.68852	5.33654	-1.4135	0.000145394	0.00523729
chr6	10451832	10452232	401	6.80219	5.93938	7.33836	-1.18887	0.000145521	0.0052392
chr7	112985455	112985855	401	5.44344	4.52803	5.99907	-1.24415	0.000145981	0.00525309
chr8	67007522	67007922	401	4.76507	3.70518	5.36946	-1.41909	0.000146164	0.005257
chr11	110490901	110491301	401	3.64887	2.16368	4.36503	-1.94027	0.000146469	0.00526414
chr12	12092596	12092996	401	4.66047	3.62102	5.25834	-1.41718	0.000146511	0.00526414
chr10	123377831	123378231	401	3.59256	2.16302	4.29633	-1.93902	0.000146711	0.00526865
chr5	147906377	147906777	401	5.11669	4.21204	5.66841	-1.28283	0.000146825	0.00527004
chr20	54611731	54612131	401	4.24417	3.09269	4.87629	-1.54629	0.000147031	0.00527326
chr5	43281746	43282146	401	4.73349	3.65624	5.34331	-1.43406	0.000147063	0.00527326
chr4	124278349	124278749	401	3.93301	2.58161	4.61836	-1.74062	0.000147699	0.00529336
chr4	64146172	64146572	401	4.25515	3.16173	4.86996	-1.51643	0.000147788	0.00529389
chr16	31472851	31473251	401	3.93073	4.49171	3.00036	1.60474	0.000148287	0.00530907
chr11	95512626	95513026	401	5.64488	4.75678	6.19053	-1.20656	0.000149108	0.00533468
chr1	217717909	217718309	401	5.02337	4.02598	5.60747	-1.34581	0.000149153	0.00533468
chr12	105418225	105418625	401	5.30187	4.30983	5.88416	-1.31277	0.000149258	0.00533571
chr15	31372577	31372977	401	4.55875	3.47571	5.17037	-1.4572	0.000149752	0.00535015
chr17	82216677	82217077	401	4.85303	3.87963	5.42902	-1.35993	0.000149813	0.00535015
chr8	125463790	125464190	401	5.58875	4.71715	6.12824	-1.20369	0.000150743	0.00537798
chr2	15912207	15912607	401	6.82221	5.95642	7.35951	-1.189	0.000150771	0.00537798
chr11	35364019	35364419	401	4.26336	3.09255	4.90104	-1.54935	0.000150882	0.00537798
chr9	125536143	125536543	401	3.53046	1.99247	4.25784	-2.03056	0.000150914	0.00537798
chr16	28863299	28863699	401	4.64572	5.11439	3.94712	1.3861	0.000150972	0.00537798
chr11	2778685	2779085	401	3.8857	2.6988	4.52794	-1.68334	0.000151395	0.00539032
chrX	13119939	13120339	401	5.78621	4.89422	6.3333	-1.19792	0.000151474	0.00539044
chr1	94963801	94964201	401	4.9588	3.93582	5.55135	-1.37368	0.0001522	0.00541356
chr5	144088631	144089031	401	4.54779	3.44636	5.16504	-1.46376	0.000152587	0.00542457
chrX	116317394	116317794	401	3.95533	2.69898	4.61653	-1.68155	0.000152714	0.00542638
chr14	92946295	92946695	401	5.51055	4.63384	6.05196	-1.21059	0.000152993	0.00543112
chr6	40907412	40907812	401	4.97959	4.01256	5.5534	-1.33459	0.000153001	0.00543112
chr12	62716832	62717232	401	4.45568	3.37477	5.06663	-1.46502	0.000153293	0.00543875
chr7	90070168	90070568	401	3.09205	0.995899	3.91263	-2.65861	0.000153397	0.00543973
chr2	150878354	150878754	401	4.85464	3.86257	5.43695	-1.36491	0.000153549	0.00544156
chr7	106064885	106065285	401	6.52711	5.71175	7.04488	-1.15431	0.000153603	0.00544156
chr7	4282879	4283279	401	5.9316	5.08918	6.45996	-1.16098	0.000154097	0.00545631
chr17	8210431	8210831	401	5.34229	5.76634	4.73913	1.21112	0.000154203	0.00545734
[truncated: 68,747 more rows]

## Sheet: B. edgeR results (RNA-seq)
geneId	geneSymbol	logFC	logCPM	F-statistics	PValue	FDR
ENSG00000185567.6	AHNAK2	-2.72232	6.51169	475.666	1.97081e-08	0.000247443
ENSG00000158104.11	HPD	-2.16866	7.66699	373.577	5.11294e-08	0.000247443
ENSG00000084754.11	HADHA	-2.22299	8.09958	345.553	6.94905e-08	0.000247443
ENSG00000127954.12	STEAP4	-2.45988	6.35062	335.971	7.76119e-08	0.000247443
ENSG00000012171.19	SEMA3B	-2.19742	7.39022	329.241	8.40329e-08	0.000247443
ENSG00000058668.14	ATP2B4	-2.06624	6.601	295.708	1.28075e-07	0.000265311
ENSG00000138166.5	DUSP5	2.35752	6.11355	290.293	1.37692e-07	0.000265311
ENSG00000059804.15	SLC2A3	2.57072	9.10239	286.909	1.44161e-07	0.000265311
ENSG00000175567.8	UCP2	-2.65985	5.99666	242.964	2.76019e-07	0.000347695
ENSG00000265972.5	TXNIP	-3.41476	4.88854	236.684	3.0567e-07	0.000347695
ENSG00000006534.15	ALDH3B1	-1.90784	6.58628	233.249	3.2358e-07	0.000347695
ENSG00000074416.14	MGLL	-1.91852	6.0717	229.629	3.43893e-07	0.000347695
ENSG00000134375.10	TIMM17A	1.64822	7.62145	224.787	3.73621e-07	0.000347695
ENSG00000182054.9	IDH2	-2.04441	5.22951	217.543	4.24352e-07	0.000347695
ENSG00000117523.16	PRRC2C	-2.041	7.33669	217.529	4.24461e-07	0.000347695
ENSG00000166750.9	SLFN5	-2.14159	4.91517	215.923	4.36853e-07	0.000347695
ENSG00000114378.16	HYAL1	-2.32575	4.70819	213.62	4.55431e-07	0.000347695
ENSG00000128510.11	CPA4	-2.5597	5.71	208.446	5.009e-07	0.000347695
ENSG00000129226.13	CD68	-4.09299	3.9667	208.156	5.03612e-07	0.000347695
ENSG00000129255.15	MPDU1	-2.00881	5.75763	207.936	5.05684e-07	0.000347695
ENSG00000012124.16	CD22	-2.4334	4.19834	207.672	5.08181e-07	0.000347695
ENSG00000169174.10	PCSK9	-2.06266	6.66871	206.491	5.19546e-07	0.000347695
ENSG00000065325.12	GLP2R	-1.65658	6.67038	198.239	6.08517e-07	0.000380868
ENSG00000153071.14	DAB2	-1.82025	5.66599	195.88	6.37386e-07	0.000380868
ENSG00000163545.8	NUAK2	1.83204	6.23344	195.146	6.46723e-07	0.000380868
ENSG00000165272.15	AQP3	-1.69667	6.43222	191.61	6.94139e-07	0.00039247
ENSG00000102034.16	ELF4	-1.8373	5.63554	189.824	7.19736e-07	0.00039247
ENSG00000143382.14	ADAMTSL4	-1.91497	7.06928	186.923	7.639e-07	0.000401675
ENSG00000048991.16	R3HDM1	-1.85428	5.13074	183.454	8.21233e-07	0.000416931
ENSG00000110917.7	MLEC	-1.6726	7.94429	175.876	9.66414e-07	0.000453162
ENSG00000134369.15	NAV1	-1.60068	6.47523	175.147	9.8202e-07	0.000453162
ENSG00000171246.5	NPTX1	-1.92544	7.69824	175.012	9.84933e-07	0.000453162
ENSG00000111676.14	ATN1	-1.49374	7.54196	173.352	1.0218e-06	0.000455879
ENSG00000272398.5	CD24	-2.32638	4.20352	171.589	1.06285e-06	0.000460247
ENSG00000124203.6	ZNF831	-1.70079	5.88349	167.776	1.15891e-06	0.000487505
ENSG00000142910.15	TINAGL1	-1.74713	5.9157	165.127	1.23209e-06	0.000503891
ENSG00000163947.11	ARHGEF3	-2.14353	4.09429	158.84	1.43028e-06	0.000569136
ENSG00000070214.15	SLC44A1	-1.82107	5.6458	156.847	1.50132e-06	0.00057166
ENSG00000168781.22	PPIP5K1	-1.84998	4.76957	154.463	1.59219e-06	0.00057166
ENSG00000107957.16	SH3PXD2A	-1.44211	7.54803	154.247	1.60076e-06	0.00057166
ENSG00000197142.10	ACSL5	-1.78489	5.00465	152.891	1.65585e-06	0.00057166
ENSG00000130508.10	PXDN	-1.61917	7.02103	152.408	1.67607e-06	0.00057166
ENSG00000047849.21	MAP4	-1.56563	8.28743	152.039	1.69171e-06	0.00057166
ENSG00000173599.13	PC	-1.40239	6.84668	151.641	1.70879e-06	0.00057166
ENSG00000115380.19	EFEMP1	-1.41463	7.45043	149.969	1.78294e-06	0.00057166
ENSG00000182534.13	MXRA7	-1.50812	6.50752	149.781	1.79153e-06	0.00057166
ENSG00000173546.7	CSPG4	-1.75945	6.82184	148.479	1.85244e-06	0.00057166
ENSG00000158825.5	CDA	-1.93746	4.46178	148.092	1.87103e-06	0.00057166
ENSG00000129925.10	TMEM8A	1.64908	5.49693	147.447	1.90255e-06	0.00057166
ENSG00000162512.15	SDC3	-1.43869	6.55117	146.448	1.95267e-06	0.000573661
ENSG00000213676.12	ATF6B	-1.55516	5.80052	145.78	1.98714e-06	0.000573661
ENSG00000168874.12	ATOH8	-3.0088	2.71008	144.648	2.04726e-06	0.000574835
ENSG00000156976.16	EIF4A2	-1.29762	7.81765	144.244	2.06929e-06	0.000574835
ENSG00000076555.15	ACACB	-1.71442	5.26421	142.484	2.16871e-06	0.00058137
ENSG00000148337.20	CIZ1	-1.49315	6.37499	141.932	2.20111e-06	0.00058137
ENSG00000108344.14	PSMD3	1.28674	7.91554	141.76	2.21128e-06	0.00058137
ENSG00000142871.16	CYR61	-1.30288	7.77838	140.517	2.28697e-06	0.000584265
ENSG00000107566.13	ERLIN1	-1.70443	5.51482	140.281	2.30166e-06	0.000584265
ENSG00000238266.2	LINC00707	-2.17866	3.67259	137.473	2.48632e-06	0.000614656
ENSG00000139613.11	SMARCC2	-1.43081	6.40889	137.205	2.50488e-06	0.000614656
ENSG00000049130.15	KITLG	-1.53865	5.46819	136.447	2.55839e-06	0.000617494
ENSG00000196154.11	S100A4	-1.25892	7.96411	135.46	2.63013e-06	0.000624571
ENSG00000102226.9	USP11	-1.46258	5.97983	133.951	2.74485e-06	0.000637311
ENSG00000111799.20	COL12A1	-1.61894	7.44085	133.626	2.77035e-06	0.000637311
ENSG00000101608.12	MYL12A	-1.45024	6.40372	131.645	2.93244e-06	0.000645138
ENSG00000094916.15	CBX5	-1.2639	7.2248	131.62	2.93461e-06	0.000645138
ENSG00000147010.17	SH3KBP1	-1.57116	5.34609	131.137	2.97597e-06	0.000645138
ENSG00000140575.12	IQGAP1	-1.32386	8.04221	131.053	2.98316e-06	0.000645138
ENSG00000069482.6	GAL	-2.10011	4.61532	130.431	3.0377e-06	0.000645138
ENSG00000069812.11	HES2	-2.49317	3.0192	130.099	3.06728e-06	0.000645138
ENSG00000126883.16	NUP214	-1.64578	6.09178	128.662	3.1996e-06	0.00064928
ENSG00000260032.1	NORAD	-1.88158	6.18691	128.531	3.21203e-06	0.00064928
ENSG00000132819.16	RBM38	1.38687	6.22263	128.455	3.21928e-06	0.00064928
ENSG00000211448.11	DIO2	-1.58372	5.13067	126.679	3.3941e-06	0.000675289
ENSG00000255730.5	AC011462.1	-10.6092	1.40706	170.659	3.47276e-06	0.000681726
ENSG00000158195.10	WASF2	-1.3127	7.00063	124.41	3.63521e-06	0.000704227
ENSG00000159842.15	ABR	-1.41363	5.78586	122.204	3.89044e-06	0.000739033
ENSG00000177106.15	EPS8L2	-1.5288	5.5741	121.999	3.91527e-06	0.000739033
ENSG00000125966.9	MMP24	-4.20792	1.21603	120.066	4.15942e-06	0.000762697
ENSG00000103175.10	WFDC1	-2.42089	2.85493	119.952	4.17446e-06	0.000762697
ENSG00000140795.12	MYLK3	-1.349	6.50493	119.789	4.19605e-06	0.000762697
ENSG00000125730.16	C3	-1.64707	5.10313	118.831	4.32547e-06	0.000769111
ENSG00000137073.21	UBAP2	-1.46162	5.70662	118.453	4.37802e-06	0.000769111
ENSG00000106351.12	AGFG2	-1.64018	4.66697	118.381	4.38805e-06	0.000769111
ENSG00000235750.9	KIAA0040	-1.74227	4.27495	116.908	4.6009e-06	0.000783971
ENSG00000154864.12	PIEZO2	-1.73004	5.88058	116.668	4.63674e-06	0.000783971
ENSG00000104856.13	RELB	1.50548	4.99619	116.458	4.66842e-06	0.000783971
ENSG00000163975.11	MELTF	-1.4004	5.56757	116.344	4.68583e-06	0.000783971
ENSG00000148357.16	HMCN2	-2.81349	2.51828	114.571	4.96577e-06	0.000812677
ENSG00000164951.15	PDP1	1.57268	5.63877	113.565	5.13393e-06	0.000812677
ENSG00000171631.14	P2RY6	-1.57653	4.932	113.134	5.20801e-06	0.000812677
ENSG00000166888.11	STAT6	-1.22279	7.35278	112.396	5.33839e-06	0.000812677
ENSG00000184205.14	TSPYL2	1.38289	5.56174	112.012	5.40762e-06	0.000812677
ENSG00000141510.17	TP53	-1.34717	5.82884	111.942	5.42042e-06	0.000812677
ENSG00000167291.15	TBC1D16	-1.3449	6.27271	111.561	5.49057e-06	0.000812677
ENSG00000116698.21	SMG7	-1.37371	6.99853	111.2	5.55801e-06	0.000812677
ENSG00000132522.15	GPS2	-1.46519	5.30313	111.125	5.5723e-06	0.000812677
ENSG00000161714.11	PLCD3	-1.38469	6.41417	110.993	5.59735e-06	0.000812677
ENSG00000124795.15	DEK	-1.37618	5.89075	110.351	5.72105e-06	0.000812677
ENSG00000164292.12	RHOBTB3	-1.51434	5.14078	110.27	5.73694e-06	0.000812677
ENSG00000171604.11	CXXC5	-1.55925	4.73467	110.058	5.77854e-06	0.000812677
ENSG00000118523.5	CTGF	-2.00233	3.40382	109.981	5.79394e-06	0.000812677
ENSG00000264717.5	NPY4R2	-2.80708	4.70959	129.023	5.85641e-06	0.000812677
ENSG00000189060.5	H1F0	-2.00697	5.64107	109.486	5.89325e-06	0.000812677
ENSG00000136026.13	CKAP4	-1.31532	7.53672	109.447	5.90107e-06	0.000812677
ENSG00000166833.20	NAV2	-1.66485	4.99253	109.313	5.92826e-06	0.000812677
ENSG00000125968.8	ID1	-1.18013	6.91326	108.903	6.01288e-06	0.000812677
ENSG00000163993.6	S100P	-1.30172	5.99289	108.885	6.01667e-06	0.000812677
ENSG00000100302.6	RASD2	-2.26845	2.88384	108.335	6.13239e-06	0.000812677
ENSG00000178802.17	MPI	-1.57659	5.49372	108.318	6.13609e-06	0.000812677
ENSG00000136295.14	TTYH3	-1.50961	6.88553	108.133	6.17573e-06	0.000812677
ENSG00000139629.15	GALNT6	-1.3088	6.32875	108.087	6.18547e-06	0.000812677
ENSG00000182628.12	SKA2	-1.67942	4.25745	107.588	6.29418e-06	0.000812677
ENSG00000054793.13	ATP9A	-1.52188	5.15384	107.243	6.3708e-06	0.000812677
ENSG00000099804.8	CDC34	1.25987	7.10616	107.053	6.41339e-06	0.000812677
ENSG00000251381.7	LINC00958	-1.37054	5.37557	106.966	6.43286e-06	0.000812677
ENSG00000106366.8	SERPINE1	-1.52322	5.23261	106.615	6.51293e-06	0.000812677
ENSG00000134202.10	GSTM3	-1.15835	6.87575	106.551	6.52779e-06	0.000812677
ENSG00000171720.9	HDAC3	1.21241	6.52352	105.919	6.67524e-06	0.000812677
ENSG00000082497.11	SERTAD4	-1.73058	4.12203	105.775	6.70966e-06	0.000812677
ENSG00000175130.6	MARCKSL1	-1.3223	6.43412	105.738	6.7185e-06	0.000812677
ENSG00000108846.15	ABCC3	-1.46024	4.94535	105.488	6.77837e-06	0.000812677
ENSG00000114779.19	ABHD14B	-1.3831	6.05896	105.443	6.78933e-06	0.000812677
ENSG00000088888.17	MAVS	-1.16607	6.7985	104.82	6.94217e-06	0.000813097
ENSG00000130707.17	ASS1	-1.13176	9.78331	104.805	6.94599e-06	0.000813097
ENSG00000166897.14	ELFN2	-1.51693	4.69812	104.754	6.95851e-06	0.000813097
ENSG00000160683.4	CXCR5	10.2202	1.09826	138.406	7.04489e-06	0.000815568
ENSG00000021762.19	OSBPL5	-1.32835	5.35521	104.232	7.09045e-06	0.000815568
ENSG00000142552.7	RCN3	-1.37412	5.16197	103.997	7.15079e-06	0.000816132
ENSG00000113083.13	LOX	-2.06766	3.42999	103.779	7.20731e-06	0.000816255
ENSG00000130720.12	FIBCD1	-1.32749	5.30639	103.462	7.29047e-06	0.00081937
ENSG00000100714.15	MTHFD1	-1.1176	7.20257	103.137	7.37709e-06	0.000822825
ENSG00000198796.6	ALPK2	-2.0151	3.21394	102.401	7.57804e-06	0.000838884
ENSG00000175215.10	CTDSP2	-1.10655	7.22883	101.855	7.73148e-06	0.000844188
ENSG00000069424.14	KCNAB2	-1.37748	5.03336	101.513	7.82963e-06	0.000844188
ENSG00000130052.13	STARD8	-1.74562	3.97412	101.512	7.82986e-06	0.000844188
ENSG00000111424.10	VDR	-1.5167	4.55541	101.237	7.90987e-06	0.000844188
ENSG00000176390.11	CRLF3	1.65804	4.11164	101.228	7.91265e-06	0.000844188
ENSG00000130635.15	COL5A1	-1.78411	8.01791	113.962	8.00045e-06	0.000847415
ENSG00000151176.7	PLBD2	-1.33712	6.29163	100.527	8.12121e-06	0.000854061
ENSG00000068383.18	INPP5A	1.56308	4.59946	99.5409	8.42669e-06	0.000879901
ENSG00000107819.13	SFXN3	-1.24615	6.15523	99.1094	8.56484e-06	0.000887246
ENSG00000010278.13	CD9	-1.18407	6.43993	98.6963	8.69974e-06	0.000887246
ENSG00000106571.13	GLI3	-2.13615	2.96442	98.6641	8.71037e-06	0.000887246
ENSG00000168453.14	HR	-2.20014	3.88582	98.5804	8.73807e-06	0.000887246
ENSG00000156453.13	PCDH1	-1.78319	3.69266	98.2085	8.8625e-06	0.000893717
ENSG00000112992.16	NNT	-1.3339	5.55959	97.6942	9.03826e-06	0.000899596
ENSG00000171992.12	SYNPO	-1.31264	6.23606	97.5113	9.1018e-06	0.000899596
ENSG00000069275.12	NUCKS1	-1.11181	8.08451	97.4048	9.13905e-06	0.000899596
ENSG00000198910.13	L1CAM	-2.34824	9.23627	140.749	9.22424e-06	0.000899596
ENSG00000168528.11	SERINC2	-1.42194	4.99306	97.1575	9.22631e-06	0.000899596
ENSG00000122966.15	CIT	-1.45707	5.13249	96.3113	9.53286e-06	0.000923371
ENSG00000115084.13	SLC35F5	1.3706	5.1464	95.9917	9.65196e-06	0.000928797
ENSG00000168765.16	GSTM4	-1.50327	4.51285	95.258	9.93243e-06	0.000945761
ENSG00000087266.15	SH3BP2	-1.41577	4.74286	95.044	1.00162e-05	0.000945761
ENSG00000164236.11	ANKRD33B	1.27084	5.34028	95.0318	1.0021e-05	0.000945761
ENSG00000158985.13	CDC42SE2	1.5592	4.72121	94.0778	1.04053e-05	0.00097279
ENSG00000110619.17	CARS	1.09511	6.90903	93.9951	1.04395e-05	0.00097279
ENSG00000088832.16	FKBP1A	-1.05817	7.37392	93.5003	1.0647e-05	0.000985883
ENSG00000100196.10	KDELR3	-1.79352	4.43168	93.2312	1.0762e-05	0.000990303
ENSG00000111801.15	BTN3A3	-1.60403	4.18915	92.7908	1.09535e-05	0.000996802
ENSG00000065427.14	KARS	-1.02721	7.91376	92.739	1.09763e-05	0.000996802
ENSG00000171551.11	ECEL1	-1.0232	8.1043	92.6048	1.10357e-05	0.000996802
ENSG00000060656.19	PTPRU	-1.50262	5.08938	91.7436	1.14264e-05	0.00102178
ENSG00000138674.16	SEC31A	-1.03514	8.03754	91.5701	1.15073e-05	0.00102178
ENSG00000070669.16	ASNS	1.19815	6.08395	91.5418	1.15205e-05	0.00102178
ENSG00000167693.16	NXN	-1.23002	5.58224	91.3085	1.16304e-05	0.00102236
ENSG00000090013.10	BLVRB	-1.27686	5.82807	91.234	1.16658e-05	0.00102236
ENSG00000136273.12	HUS1	1.38562	5.03697	90.6529	1.19464e-05	0.00103472
ENSG00000100097.11	LGALS1	-1.04476	7.59531	90.5777	1.19834e-05	0.00103472
ENSG00000002746.14	HECW1	-2.61818	2.25504	90.3919	1.20752e-05	0.00103472
ENSG00000168591.15	TMUB2	-1.50912	4.30041	90.3661	1.2088e-05	0.00103472
ENSG00000135114.12	OASL	-1.27967	6.0426	90.2078	1.21671e-05	0.00103547
ENSG00000142303.13	ADAMTS10	-2.11109	2.72543	90.0543	1.22444e-05	0.00103606
ENSG00000135040.15	NAA35	1.2235	5.43131	89.6015	1.2476e-05	0.00104962
ENSG00000259330.2	INAFM2	-2.26618	2.55184	89.4334	1.25633e-05	0.00105097
ENSG00000163755.8	HPS3	-1.50933	4.70876	89.1729	1.27002e-05	0.00105641
ENSG00000099250.17	NRP1	-1.70258	3.65434	88.9602	1.28134e-05	0.00105984
ENSG00000124006.14	OBSL1	-1.04245	7.05079	88.7986	1.29002e-05	0.00106082
ENSG00000135486.17	HNRNPA1	-1.04199	9.82142	88.5267	1.30479e-05	0.00106082
ENSG00000162520.14	SYNC	-2.73656	2.2517	88.431	1.31004e-05	0.00106082
ENSG00000129460.15	NGDN	1.28402	5.11188	88.4074	1.31134e-05	0.00106082
ENSG00000183696.13	UPP1	1.25019	5.31385	88.1831	1.32377e-05	0.00106502
ENSG00000116299.16	KIAA1324	-1.965	2.99773	88.0125	1.33331e-05	0.00106611
ENSG00000076356.6	PLXNA2	-1.98616	3.14351	87.811	1.3447e-05	0.00106611
ENSG00000166689.15	PLEKHA7	-1.84548	3.21207	87.6564	1.35353e-05	0.00106611
ENSG00000272325.1	NUDT3	-1.2818	6.26143	87.6076	1.35632e-05	0.00106611
ENSG00000187634.11	SAMD11	-1.94663	3.84309	87.4478	1.36554e-05	0.00106611
ENSG00000198931.10	APRT	-1.07538	6.68825	87.3956	1.36857e-05	0.00106611
ENSG00000106245.10	BUD31	1.12829	6.31335	87.0188	1.39068e-05	0.00107763
ENSG00000150938.9	CRIM1	-1.20018	6.10418	86.4449	1.42521e-05	0.00109565
ENSG00000163541.11	SUCLG1	-1.14739	6.35036	86.386	1.42882e-05	0.00109565
ENSG00000219410.6	AC125494.1	4.52469	2.41315	95.8721	1.47729e-05	0.00110843
ENSG00000183684.7	ALYREF	1.08597	7.49795	85.5889	1.47874e-05	0.00110843
ENSG00000107438.8	PDLIM1	-1.15858	6.49545	85.5314	1.48243e-05	0.00110843
ENSG00000125351.11	UPF3B	1.4877	4.4272	85.4684	1.48648e-05	0.00110843
ENSG00000174306.21	ZHX3	-1.29065	5.31446	85.4607	1.48697e-05	0.00110843
ENSG00000134686.18	PHC2	-1.2439	5.53696	85.4037	1.49065e-05	0.00110843
ENSG00000130827.6	PLXNA3	-1.65965	3.91453	85.0584	1.51318e-05	0.00111222
ENSG00000123472.12	ATPAF1	-1.20452	5.27834	85.0021	1.51689e-05	0.00111222
ENSG00000090530.9	P3H2	-1.05189	7.08654	84.8613	1.52623e-05	0.00111222
ENSG00000173166.17	RAPH1	-1.30316	4.86825	84.6654	1.53934e-05	0.00111222
ENSG00000204174.7	NPY4R	-2.62995	5.33557	116.064	1.54084e-05	0.00111222
ENSG00000105221.16	AKT2	0.997797	7.40474	84.6396	1.54107e-05	0.00111222
ENSG00000168077.13	SCARA3	-1.57416	4.15957	84.4032	1.5571e-05	0.0011183
ENSG00000136810.12	TXN	-0.975985	8.05257	84.286	1.56512e-05	0.00111861
ENSG00000132003.9	ZSWIM4	-1.34654	5.2411	83.8698	1.59405e-05	0.00113377
ENSG00000173744.17	AGFG1	-1.26896	5.30817	83.6353	1.61063e-05	0.00113538
ENSG00000185585.19	OLFML2A	-1.98655	3.45775	83.6199	1.61173e-05	0.00113538
ENSG00000122557.9	HERPUD2	1.65974	3.78495	83.458	1.62331e-05	0.0011381
ENSG00000156639.11	ZFAND3	-1.21299	5.41157	82.9191	1.66264e-05	0.0011412
ENSG00000139131.12	YARS2	1.07557	6.47609	82.4853	1.69517e-05	0.0011412
ENSG00000266028.7	SRGAP2	-1.13882	6.14212	82.4515	1.69773e-05	0.0011412
ENSG00000013619.13	MAMLD1	-1.41963	4.60357	82.4365	1.69888e-05	0.0011412
ENSG00000149313.10	AASDHPPT	1.23149	5.19414	82.4331	1.69914e-05	0.0011412
ENSG00000215182.8	MUC5AC	-1.70959	5.11492	82.2984	1.70943e-05	0.0011412
ENSG00000111652.9	COPS7A	-1.10781	6.18999	82.1552	1.72046e-05	0.0011412
ENSG00000130309.10	COLGALT1	-1.2471	7.96595	82.1115	1.72383e-05	0.0011412
ENSG00000105520.10	PLPPR2	-1.30167	5.24306	82.0279	1.73033e-05	0.0011412
ENSG00000188060.7	RAB42	-1.51915	4.16468	82.0274	1.73037e-05	0.0011412
ENSG00000105695.14	MAG	-2.20936	2.45232	82.0201	1.73094e-05	0.0011412
ENSG00000267561.2	AC093155.3	2.08889	2.56325	81.9424	1.737e-05	0.0011412
ENSG00000163900.10	TMEM41A	1.16043	5.5479	81.8883	1.74124e-05	0.0011412
ENSG00000134755.15	DSC2	-1.51882	4.03891	81.8484	1.74438e-05	0.0011412
ENSG00000174282.11	ZBTB4	-1.14417	5.88133	81.7561	1.75166e-05	0.0011412
ENSG00000137474.20	MYO7A	-2.13232	2.59838	81.7549	1.75175e-05	0.0011412
ENSG00000275216.2	AL161431.1	-1.82298	3.43885	81.0977	1.80469e-05	0.0011705
ENSG00000242498.7	ARPIN	-1.17819	5.27729	80.5612	1.8494e-05	0.00118894
ENSG00000117713.19	ARID1A	-1.65131	5.92904	80.4331	1.86027e-05	0.00118894
ENSG00000165629.19	ATP5F1C	-1.07584	7.4221	80.4095	1.86229e-05	0.00118894
ENSG00000156510.12	HKDC1	1.72453	5.26833	80.3582	1.86668e-05	0.00118894
ENSG00000140691.16	ARMC5	1.52515	4.57825	80.2544	1.87558e-05	0.00118894
ENSG00000171608.15	PIK3CD	-1.21296	5.4529	80.1851	1.88157e-05	0.00118894
ENSG00000166987.14	MBD6	-1.16954	5.28039	79.9122	1.90534e-05	0.00119193
ENSG00000115977.18	AAK1	-1.40999	5.0607	79.8974	1.90665e-05	0.00119193
ENSG00000080819.7	CPOX	1.27114	4.77878	79.8338	1.91225e-05	0.00119193
ENSG00000169635.9	HIC2	1.29253	4.99361	79.6747	1.92635e-05	0.00119193
ENSG00000006652.13	IFRD1	1.26838	6.47797	79.5126	1.94084e-05	0.00119193
ENSG00000109686.17	SH3D19	-1.25783	4.87186	79.501	1.94189e-05	0.00119193
ENSG00000079308.18	TNS1	-1.39191	6.92246	79.4891	1.94296e-05	0.00119193
ENSG00000174775.16	HRAS	1.15027	5.4984	79.2697	1.96283e-05	0.00119803
ENSG00000186919.12	ZACN	1.39504	4.35775	79.2001	1.96918e-05	0.00119803
ENSG00000140044.12	JDP2	-1.55038	3.82182	78.7763	2.00845e-05	0.00121689
ENSG00000105323.16	HNRNPUL1	-1.01911	7.78206	78.6295	2.02228e-05	0.00121872
ENSG00000128641.18	MYO1B	-1.28866	5.10965	78.5689	2.02802e-05	0.00121872
ENSG00000158109.14	TPRG1L	1.1322	5.57641	78.2651	2.05713e-05	0.00123042
ENSG00000213782.7	DDX47	0.958793	7.40101	78.1726	2.06609e-05	0.00123042
ENSG00000198171.12	DDRGK1	1.13189	5.59713	78.106	2.07257e-05	0.00123042
ENSG00000196498.13	NCOR2	-1.0412	7.66428	77.0795	2.17581e-05	0.00128131
ENSG00000185630.18	PBX1	-1.20568	5.61598	77.0141	2.1826e-05	0.00128131
ENSG00000013583.9	HEBP1	-1.46789	4.47957	76.9691	2.1873e-05	0.00128131
ENSG00000128422.16	KRT17	-1.10425	6.36183	76.9136	2.1931e-05	0.00128131
ENSG00000163453.11	IGFBP7	-1.26052	5.38739	76.7653	2.20869e-05	0.00128532
ENSG00000115255.10	REEP6	-1.37738	5.61251	76.6118	2.22498e-05	0.00128593
ENSG00000179532.12	DNHD1	-1.38193	4.50501	76.5908	2.22722e-05	0.00128593
ENSG00000113231.13	PDE8B	-1.51287	3.80472	75.849	2.30818e-05	0.00132326
ENSG00000181192.11	DHTKD1	-1.2261	6.07356	75.8342	2.30984e-05	0.00132326
ENSG00000103319.11	EEF2K	-1.13178	5.63098	75.7098	2.32379e-05	0.00132609
ENSG00000182768.8	NGRN	0.956414	7.18025	75.3503	2.36468e-05	0.00134253
ENSG00000177954.12	RPS27	-0.920342	8.87521	75.2432	2.37705e-05	0.00134253
ENSG00000185650.9	ZFP36L1	1.08706	5.89739	75.2181	2.37996e-05	0.00134253
ENSG00000136715.18	SAP130	-1.16053	5.18792	75.082	2.3958e-05	0.00134631
ENSG00000102287.18	GABRE	-1.21286	5.05756	74.9266	2.41406e-05	0.00134928
ENSG00000160606.10	TLCD1	-1.25188	4.70125	74.8609	2.42183e-05	0.00134928
ENSG00000101986.11	ABCD1	-1.07734	6.08926	74.804	2.42858e-05	0.00134928
ENSG00000137203.11	TFAP2A	-0.985935	7.17798	74.6038	2.45253e-05	0.00135552
ENSG00000259040.5	BLOC1S5-TXNDC5	9.16818	0.0522682	95.122	2.45823e-05	0.00135552
ENSG00000106009.15	BRAT1	1.01208	6.68484	74.4142	2.4755e-05	0.00135995
ENSG00000166272.17	WBP1L	-1.2886	4.71727	74.0869	2.51576e-05	0.00137693
ENSG00000178814.16	OPLAH	-1.27467	4.6016	73.9062	2.53834e-05	0.00138415
ENSG00000135632.11	SMYD5	1.09506	6.05801	73.7884	2.5532e-05	0.00138711
ENSG00000073849.14	ST6GAL1	-1.201	4.95726	73.6351	2.5727e-05	0.00139121
ENSG00000221890.3	NPTXR	-1.47951	3.97781	73.581	2.57963e-05	0.00139121
ENSG00000259661.1	AC068831.4	9.20725	0.091868	92.7471	2.67186e-05	0.00143569
ENSG00000063978.15	RNF4	1.03224	6.34313	72.6598	2.70121e-05	0.00143891
ENSG00000134531.9	EMP1	-1.30659	5.02087	72.55	2.71618e-05	0.00143891
ENSG00000162337.11	LRP5	-1.17009	7.00167	72.5319	2.71866e-05	0.00143891
ENSG00000184584.12	TMEM173	-1.32612	4.34773	72.3888	2.73834e-05	0.00143891
ENSG00000142102.15	PGGHG	-1.81098	3.20778	72.361	2.74218e-05	0.00143891
ENSG00000165801.9	ARHGEF40	-1.45094	4.05847	72.2963	2.75115e-05	0.00143891
ENSG00000019549.11	SNAI2	-2.21351	2.85266	72.2555	2.75684e-05	0.00143891
ENSG00000169604.19	ANTXR1	-0.983776	7.91554	72.2189	2.76195e-05	0.00143891
ENSG00000166444.18	ST5	-1.17218	4.98252	72.1808	2.76727e-05	0.00143891
ENSG00000153574.8	RPIA	1.29242	4.80778	72.1215	2.77559e-05	0.00143891
ENSG00000116679.15	IVNS1ABP	-0.992428	6.75295	71.9667	2.79745e-05	0.00144081
ENSG00000225663.7	MCRIP1	1.44259	4.31167	71.9569	2.79883e-05	0.00144081
ENSG00000256537.4	SMIM10L1	1.17436	5.19611	71.8224	2.81802e-05	0.00144563
ENSG00000112110.9	MRPL18	-1.13729	5.30503	71.6371	2.84471e-05	0.00145391
ENSG00000173821.19	RNF213	-2.22364	7.28321	102.286	2.8539e-05	0.00145391
ENSG00000231419.6	LINC00689	-1.6508	3.64118	71.4121	2.87755e-05	0.0014577
ENSG00000111331.12	OAS3	-1.2387	6.31047	71.3733	2.88326e-05	0.0014577
ENSG00000176907.4	TCIM	-1.51731	3.65074	71.3205	2.89104e-05	0.0014577
ENSG00000143365.17	RORC	-1.95561	2.86606	71.2164	2.90649e-05	0.00146049
ENSG00000130600.18	H19	-1.17211	4.97811	71.0857	2.92603e-05	0.0014653
ENSG00000160214.12	RRP1	0.946424	6.87704	70.9018	2.95378e-05	0.00147148
ENSG00000137076.20	TLN1	-1.09997	8.449	70.8718	2.95835e-05	0.00147148
ENSG00000161013.16	MGAT4B	0.902825	7.61088	70.4622	3.0215e-05	0.00149783
ENSG00000120697.8	ALG5	1.48293	3.76768	70.2497	3.05494e-05	0.00150763
ENSG00000256040.2	PAPPA-AS1	9.20034	0.0886162	88.9845	3.06175e-05	0.00150763
ENSG00000132182.11	NUP210	-0.906125	8.71704	70.0371	3.08885e-05	0.00151591
ENSG00000127804.12	METTL16	1.00218	6.38219	69.8774	3.11463e-05	0.00152141
ENSG00000008118.9	CAMK1G	-1.98925	3.97611	69.8398	3.12073e-05	0.00152141
ENSG00000205730.6	ITPRIPL2	-1.05084	5.91895	69.6975	3.144e-05	0.00152528
ENSG00000166025.17	AMOTL1	-1.38481	6.29774	69.5333	3.1711e-05	0.00152528
ENSG00000112624.12	BICRAL	-1.44142	3.8624	69.4227	3.18952e-05	0.00152528
ENSG00000163512.13	AZI2	1.21761	4.79279	69.4205	3.18989e-05	0.00152528
ENSG00000100439.10	ABHD4	-1.31502	4.28947	69.4059	3.19233e-05	0.00152528
ENSG00000111077.17	TNS2	-1.22044	5.06869	69.404	3.19266e-05	0.00152528
ENSG00000168615.11	ADAM9	-1.33245	6.18682	69.353	3.2012e-05	0.00152528
ENSG00000131473.16	ACLY	-0.976044	8.94554	69.2725	3.21476e-05	0.0015268
ENSG00000131981.15	LGALS3	-0.929654	6.85046	69.0003	3.26113e-05	0.00153596
ENSG00000119685.19	TTLL5	-1.35107	4.12173	68.9931	3.26236e-05	0.00153596
ENSG00000272405.1	AL365181.3	-1.06799	5.50058	68.9758	3.26533e-05	0.00153596
ENSG00000167778.8	SPRYD3	1.02124	6.26237	68.711	3.31132e-05	0.00155263
ENSG00000186854.10	TRABD2A	-1.08612	5.26162	68.5287	3.34344e-05	0.00155942
ENSG00000170445.13	HARS	0.914736	7.15576	68.4777	3.3525e-05	0.00155942
ENSG00000151233.10	GXYLT1	1.1035	5.20197	68.3999	3.36638e-05	0.00155942
ENSG00000167644.11	C19orf33	-1.07743	5.339	68.3899	3.36817e-05	0.00155942
ENSG00000180182.10	MED14	-1.02875	6.14263	68.1604	3.40955e-05	0.00157363
ENSG00000153395.9	LPCAT1	0.905973	8.06071	68.0112	3.43679e-05	0.00157534
ENSG00000180822.11	PSMG4	1.17754	5.46691	67.9866	3.44131e-05	0.00157534
ENSG00000173653.7	RCE1	1.11447	5.05558	67.9247	3.45271e-05	0.00157534
ENSG00000198915.11	RASGEF1A	-1.18182	4.73151	67.9066	3.45606e-05	0.00157534
ENSG00000196924.15	FLNA	-1.78048	10.7651	90.0226	3.48335e-05	0.00158288
ENSG00000260267.1	AC026471.1	-2.20516	2.0418	67.6551	3.50294e-05	0.00158646
ENSG00000115234.10	SNX17	-1.07777	6.4969	67.5569	3.52145e-05	0.00158646
ENSG00000075275.16	CELSR1	-1.11763	5.91912	67.5021	3.53184e-05	0.00158646
ENSG00000077942.18	FBLN1	-1.016	7.65285	67.3881	3.55357e-05	0.00158646
ENSG00000167985.6	SDHAF2	1.13573	5.14053	67.3719	3.55667e-05	0.00158646
ENSG00000113273.16	ARSB	-1.34209	4.30993	67.3614	3.55867e-05	0.00158646
ENSG00000108799.12	EZH1	1.13961	4.91745	67.3198	3.56665e-05	0.00158646
ENSG00000160211.17	G6PD	-0.971846	6.44253	67.2537	3.57939e-05	0.00158733
ENSG00000197565.15	COL4A6	-1.44489	3.88627	67.1486	3.59976e-05	0.0015899
ENSG00000150756.13	FAM173B	1.33902	4.16105	67.1125	3.60679e-05	0.0015899
ENSG00000175220.11	ARHGAP1	0.984739	6.40021	66.9826	3.63222e-05	0.00159265
ENSG00000109103.11	UNC119	1.07108	5.26135	66.9702	3.63466e-05	0.00159265
ENSG00000113719.15	ERGIC1	-0.987118	8.20155	66.6323	3.70192e-05	0.00161459
ENSG00000003056.7	M6PR	-0.967384	7.63896	66.6088	3.70666e-05	0.00161459
ENSG00000095321.16	CRAT	-1.60189	4.31909	66.3896	3.75119e-05	0.00162629
ENSG00000109501.13	WFS1	1.04724	5.57502	66.3394	3.7615e-05	0.00162629
ENSG00000143515.16	ATP8B2	-2.11763	2.1751	66.3142	3.76667e-05	0.00162629
ENSG00000132017.10	DCAF15	1.0093	5.95266	66.1548	3.79966e-05	0.00163565
ENSG00000106688.11	SLC1A1	-1.48986	3.73595	66.0362	3.82443e-05	0.00163565
ENSG00000027697.14	IFNGR1	1.24477	4.42901	65.9478	3.84302e-05	0.00163565
ENSG00000173473.10	SMARCC1	-1.01914	7.40262	65.9118	3.85062e-05	0.00163565
ENSG00000119383.19	PTPA	0.889209	7.52205	65.8958	3.85401e-05	0.00163565
ENSG00000088280.18	ASAP3	-1.43575	3.80528	65.8546	3.86276e-05	0.00163565
ENSG00000186591.12	UBE2H	-1.04187	5.80747	65.7358	3.88808e-05	0.00163565
ENSG00000048707.15	VPS13D	-1.40817	4.97121	65.6968	3.89645e-05	0.00163565
ENSG00000070778.12	PTPN21	-1.76773	2.85955	65.6237	3.91217e-05	0.00163565
ENSG00000065308.4	TRAM2	-1.3902	5.84561	65.5977	3.9178e-05	0.00163565
ENSG00000197081.13	IGF2R	-1.24528	7.63343	65.4574	3.94827e-05	0.00163565
ENSG00000151012.13	SLC7A11	2.03528	2.82465	65.4444	3.95111e-05	0.00163565
ENSG00000206337.10	HCP5	-2.2232	2.59446	65.4068	3.95932e-05	0.00163565
ENSG00000213066.12	FGFR1OP	1.32308	4.07736	65.4014	3.9605e-05	0.00163565
ENSG00000171067.10	C11orf24	-1.22161	5.02662	65.3955	3.9618e-05	0.00163565
ENSG00000099821.13	POLRMT	0.880311	7.61206	65.376	3.96609e-05	0.00163565
ENSG00000091490.10	SEL1L3	-1.16327	4.97091	65.2854	3.98602e-05	0.00163928
ENSG00000100320.22	RBFOX2	-1.04358	6.66768	65.1511	4.01583e-05	0.00164441
ENSG00000149573.8	MPZL2	-1.34897	3.96494	65.1287	4.02083e-05	0.00164441
ENSG00000084676.15	NCOA1	-1.44703	3.61377	64.8663	4.07994e-05	0.00166166
ENSG00000070495.14	JMJD6	0.973743	6.25016	64.8411	4.08568e-05	0.00166166
ENSG00000111341.9	MGP	-1.45264	4.00435	64.7391	4.109e-05	0.00166166
ENSG00000198917.12	SPOUT1	0.983618	6.12426	64.7374	4.10939e-05	0.00166166
ENSG00000167767.13	KRT80	-1.10291	6.58272	64.6936	4.11945e-05	0.00166166
ENSG00000125817.7	CENPB	-1.00044	5.97025	64.5572	4.15098e-05	0.00166981
ENSG00000091986.15	CCDC80	-1.40226	3.89985	64.3487	4.19979e-05	0.00168484
ENSG00000170786.12	SDR16C5	-1.72334	2.81998	63.8825	4.31152e-05	0.00172496
ENSG00000085662.13	AKR1B1	-0.934567	7.82156	63.6971	4.35697e-05	0.00173621
ENSG00000116857.16	TMEM9	0.922599	6.94684	63.6718	4.36322e-05	0.00173621
ENSG00000142396.10	ERVK3-1	1.0431	5.40053	63.5724	4.38789e-05	0.00174045
ENSG00000158769.17	F11R	-1.01069	5.67402	63.4482	4.41895e-05	0.00174045
ENSG00000149182.14	ARFGAP2	0.94678	6.46375	63.3257	4.44988e-05	0.00174045
ENSG00000184428.12	TOP1MT	1.07911	6.29549	63.3031	4.4556e-05	0.00174045
ENSG00000136819.15	C9orf78	0.92335	6.59545	63.189	4.48469e-05	0.00174045
ENSG00000158435.7	CNOT11	-1.07031	5.92036	63.0819	4.5122e-05	0.00174045
ENSG00000132507.17	EIF5A	0.843054	10.6432	63.0541	4.51937e-05	0.00174045
ENSG00000119900.8	OGFRL1	-1.27535	4.25722	63.0343	4.52448e-05	0.00174045
ENSG00000171612.6	SLC25A33	1.14144	4.71644	63.0266	4.52649e-05	0.00174045
ENSG00000261373.1	VPS9D1-AS1	-1.26067	4.25048	62.996	4.53441e-05	0.00174045
ENSG00000117399.13	CDC20	-0.861361	7.42282	62.9625	4.54311e-05	0.00174045
ENSG00000137868.18	STRA6	-1.42703	3.76711	62.9541	4.5453e-05	0.00174045
ENSG00000224389.9	C4B	-1.76983	2.64063	62.9467	4.54721e-05	0.00174045
ENSG00000143537.13	ADAM15	-0.910332	8.19698	62.9452	4.54761e-05	0.00174045
ENSG00000204842.15	ATXN2	-1.01776	5.47693	62.8735	4.56633e-05	0.00174045
ENSG00000156535.14	CD109	-0.998686	5.83677	62.8505	4.57234e-05	0.00174045
ENSG00000172819.16	RARG	-0.991867	6.28123	62.8301	4.5777e-05	0.00174045
ENSG00000129422.14	MTUS1	-1.08923	4.98304	62.796	4.58667e-05	0.00174045
ENSG00000197712.11	FAM114A1	-1.17089	4.60671	62.6777	4.61795e-05	0.00174782
ENSG00000181885.18	CLDN7	-1.88501	2.43737	62.6219	4.63279e-05	0.00174894
ENSG00000103365.15	GGA2	-1.00402	5.73301	62.3169	4.71496e-05	0.0017745
ENSG00000053747.16	LAMA3	-1.08619	5.08709	62.2686	4.72814e-05	0.0017745
ENSG00000106948.16	AKNA	-1.39575	3.96932	62.2375	4.73666e-05	0.0017745
ENSG00000140859.15	KIFC3	0.854364	8.09616	62.1003	4.77442e-05	0.00178257
ENSG00000159461.14	AMFR	0.970157	6.54967	62.0715	4.78242e-05	0.00178257
ENSG00000072682.18	P4HA2	-1.10091	5.57103	62.0167	4.79764e-05	0.00178373
ENSG00000116690.12	PRG4	-1.646	3.81924	61.9558	4.81464e-05	0.00178554
ENSG00000178381.11	ZFAND2A	1.16004	4.73988	61.8962	4.83133e-05	0.00178723
ENSG00000100888.13	CHD8	-1.28721	6.01377	61.7489	4.87294e-05	0.00179136
ENSG00000155363.18	MOV10	-0.864999	7.24106	61.7361	4.87656e-05	0.00179136
ENSG00000102854.15	MSLN	-1.06478	6.37106	61.7275	4.87899e-05	0.00179136
ENSG00000133466.13	C1QTNF6	0.85971	7.69845	61.6679	4.89599e-05	0.00179254
ENSG00000198853.11	RUSC2	-1.08255	5.20827	61.6309	4.90656e-05	0.00179254
ENSG00000132561.13	MATN2	-2.29291	1.69204	61.555	4.92835e-05	0.00179604
ENSG00000133056.13	PIK3C2B	-1.11013	6.82585	61.3289	4.99398e-05	0.00181184
ENSG00000153162.8	BMP6	-0.977675	5.93507	61.3209	4.99632e-05	0.00181184
ENSG00000106609.16	TMEM248	-0.98266	6.39551	60.8677	5.13129e-05	0.00185622
ENSG00000162636.15	FAM102B	-1.01457	6.05108	60.7862	5.15606e-05	0.00186061
ENSG00000150347.15	ARID5B	-1.14583	4.67022	60.7442	5.16887e-05	0.00186067
ENSG00000187123.14	LYPD6	-1.87443	2.33904	60.2575	5.32031e-05	0.00191051
ENSG00000128973.12	CLN6	1.02351	6.90571	60.188	5.34236e-05	0.00191376
ENSG00000182158.14	CREB3L2	-1.02768	6.63489	60.1029	5.36955e-05	0.001915
ENSG00000264230.8	ANXA8L1	-1.30884	4.22677	60.0564	5.38448e-05	0.001915
ENSG00000152952.11	PLOD2	-1.27518	6.78049	60.0553	5.38484e-05	0.001915
ENSG00000125726.10	CD70	-0.991888	5.53238	59.9502	5.41877e-05	0.00192031
ENSG00000245848.2	CEBPA	-1.59415	5.10818	61.9221	5.42601e-05	0.00192031
ENSG00000178057.14	NDUFAF3	-0.984005	5.8068	59.8882	5.43891e-05	0.00192031
ENSG00000157593.18	SLC35B2	-1.09886	6.35601	59.7633	5.47979e-05	0.0019273
ENSG00000163683.11	SMIM14	-1.58057	3.51887	59.708	5.49801e-05	0.0019273
ENSG00000113282.13	CLINT1	-1.02373	5.95907	59.7037	5.49943e-05	0.0019273
ENSG00000165072.9	MAMDC2	-1.10829	5.08738	59.6685	5.51106e-05	0.0019273
ENSG00000104643.9	MTMR9	1.35861	3.7762	59.4799	5.57395e-05	0.001941
ENSG00000173230.15	GOLGB1	-1.35137	5.0227	59.4406	5.58715e-05	0.001941
ENSG00000179913.10	B3GNT3	-2.08305	1.93416	59.4328	5.5898e-05	0.001941
ENSG00000134824.13	FADS2	-0.985441	5.51	59.3389	5.62152e-05	0.00194653
ENSG00000130517.13	PGPEP1	-1.11418	4.70324	59.268	5.64566e-05	0.00194653
ENSG00000068489.12	PRR11	-1.23351	5.33017	59.2302	5.65857e-05	0.00194653
ENSG00000068912.13	ERLEC1	-1.0104	5.36241	59.2302	5.65859e-05	0.00194653
ENSG00000103335.22	PIEZO1	-0.814098	8.47975	59.083	5.70921e-05	0.00195532
ENSG00000111671.9	SPSB2	-1.57668	3.04219	59.0787	5.7107e-05	0.00195532
ENSG00000102302.7	FGD1	-1.04391	5.16335	58.9844	5.74348e-05	0.0019595
ENSG00000104969.9	SGTA	0.90557	6.9557	58.967	5.74952e-05	0.0019595
ENSG00000197903.7	HIST1H2BK	1.32194	4.08071	58.7979	5.80895e-05	0.00197518
ENSG00000116604.17	MEF2D	-0.966028	5.92649	58.7169	5.83767e-05	0.00197663
ENSG00000141503.15	MINK1	-0.863991	6.77378	58.7101	5.84009e-05	0.00197663
ENSG00000145569.5	OTULINL	-1.32922	4.09274	58.6532	5.86038e-05	0.00197895
ENSG00000155324.9	GRAMD2B	-1.29704	4.30813	58.5623	5.89298e-05	0.00198541
ENSG00000108175.16	ZMIZ1	-0.945663	6.16565	58.2361	6.01189e-05	0.00201925
ENSG00000137312.14	FLOT1	-0.92533	7.32316	58.1988	6.02567e-05	0.00201925
ENSG00000166033.12	HTRA1	-1.17516	4.69268	58.1748	6.03458e-05	0.00201925
ENSG00000130939.18	UBE4B	-1.23041	5.95443	58.112	6.05792e-05	0.00202246
ENSG00000105404.10	RABAC1	-1.17025	4.41283	57.8871	6.14243e-05	0.00204604
ENSG00000164078.12	MST1R	-1.10676	4.67519	57.812	6.171e-05	0.00205092
ENSG00000008513.15	ST3GAL1	-1.23418	5.48994	57.7278	6.2032e-05	0.00205698
ENSG00000149418.10	ST14	-1.17163	4.75591	57.6495	6.23334e-05	0.00206233
ENSG00000144228.8	SPOPL	1.37318	3.67298	57.5665	6.26549e-05	0.00206256
ENSG00000100129.17	EIF3L	-0.825622	8.36031	57.5407	6.27551e-05	0.00206256
ENSG00000164176.12	EDIL3	-1.40611	3.99237	57.5393	6.27608e-05	0.00206256
ENSG00000152104.11	PTPN14	-1.02989	6.42789	57.4812	6.29877e-05	0.00206541
ENSG00000091136.13	LAMB1	-0.880622	7.59135	57.4302	6.31874e-05	0.00206735
ENSG00000177885.14	GRB2	-0.823264	7.27643	57.2341	6.39635e-05	0.00208393
ENSG00000171490.12	RSL1D1	0.846018	7.79531	57.2307	6.39771e-05	0.00208393
ENSG00000100413.16	POLR3H	-0.986217	6.14078	57.1121	6.44523e-05	0.00209267
ENSG00000143126.7	CELSR2	-0.948918	7.57812	57.0929	6.45297e-05	0.00209267
ENSG00000101255.10	TRIB3	0.971102	6.86957	57.0226	6.48139e-05	0.00209502
ENSG00000175938.6	ORAI3	-1.53086	3.03027	57.0046	6.48868e-05	0.00209502
ENSG00000167123.18	CERCAM	-0.896967	6.42445	56.9034	6.52993e-05	0.00210048
ENSG00000137135.17	ARHGEF39	-1.4197	4.16138	56.8932	6.53413e-05	0.00210048
ENSG00000170113.15	NIPA1	1.13703	4.76947	56.7932	6.57521e-05	0.00210908
ENSG00000137699.16	TRIM29	-0.994817	5.70652	56.7315	6.60075e-05	0.00211267
ENSG00000137628.16	DDX60	-1.55464	3.34864	56.5844	6.66214e-05	0.00212137
ENSG00000240303.7	ACAD11	-1.30485	3.9303	56.5741	6.66644e-05	0.00212137
ENSG00000266094.7	RASSF5	-1.26573	4.1565	56.5392	6.68112e-05	0.00212137
ENSG00000166226.12	CCT2	0.792007	9.06305	56.5286	6.68557e-05	0.00212137
ENSG00000129116.18	PALLD	-1.05523	6.15623	56.4806	6.70586e-05	0.00212253
ENSG00000152601.17	MBNL1	-1.13788	5.26994	56.4518	6.71807e-05	0.00212253
ENSG00000168487.18	BMP1	-0.926153	6.04334	56.3612	6.75663e-05	0.00213015
ENSG00000165548.10	TMEM63C	-1.67665	2.72685	56.2527	6.80315e-05	0.00214023
ENSG00000103495.13	MAZ	-1.01485	7.11866	56.2078	6.8225e-05	0.00214174
ENSG00000144647.5	POMGNT2	0.957851	5.51852	56.1541	6.84578e-05	0.00214448
ENSG00000186106.11	ANKRD46	1.34791	3.56809	56.0956	6.87122e-05	0.00214788
ENSG00000090924.14	PLEKHG2	-1.49216	3.90136	55.9636	6.9291e-05	0.00216138
ENSG00000116096.5	SPR	0.906197	6.40076	55.7642	7.01766e-05	0.00217441
ENSG00000163399.15	ATP1A1	-0.782751	9.72531	55.744	7.02674e-05	0.00217441
ENSG00000198455.4	ZXDB	-0.979428	5.22626	55.6532	7.06761e-05	0.00217441
ENSG00000247077.6	PGAM5	0.801189	7.53446	55.6416	7.07284e-05	0.00217441
ENSG00000198353.7	HOXC4	-1.76848	2.39405	55.6289	7.0786e-05	0.00217441
ENSG00000205336.11	ADGRG1	-0.977344	5.71459	55.6254	7.08019e-05	0.00217441
ENSG00000113140.10	SPARC	-0.953366	5.52269	55.6237	7.08092e-05	0.00217441
ENSG00000105321.13	CCDC9	1.11856	4.51211	55.5731	7.10392e-05	0.00217441
ENSG00000132613.14	MTSS1L	-0.844233	6.73795	55.551	7.11395e-05	0.00217441
ENSG00000181143.15	MUC16	-3.31393	3.20178	72.0192	7.11855e-05	0.00217441
ENSG00000127837.9	AAMP	0.805389	7.39798	55.4267	7.17086e-05	0.00218585
ENSG00000204227.4	RING1	-1.02904	4.9989	55.3876	7.18889e-05	0.00218682
ENSG00000123999.4	INHA	-2.00178	2.52157	55.3184	7.2209e-05	0.00218975
ENSG00000185561.9	TLCD2	-1.73278	2.76278	55.3025	7.22828e-05	0.00218975
ENSG00000060971.17	ACAA1	0.949223	5.74673	55.1426	7.30306e-05	0.00220452
ENSG00000259431.5	THTPA	-1.49296	3.0491	55.1343	7.30696e-05	0.00220452
ENSG00000143850.14	PLEKHA6	-1.0205	6.15314	54.9217	7.40793e-05	0.00223041
ENSG00000167657.13	DAPK3	0.954082	5.67983	54.8647	7.4353e-05	0.00223408
ENSG00000088256.8	GNA11	-0.941516	6.2226	54.8299	7.45209e-05	0.00223456
ENSG00000215256.3	DHRS4-AS1	-1.88244	3.0647	54.6517	7.53869e-05	0.00225594
ENSG00000170345.9	FOS	-1.08755	6.09825	54.4744	7.62614e-05	0.00227748
ENSG00000148985.19	PGAP2	0.960392	5.32558	54.433	7.64678e-05	0.00227902
ENSG00000113552.15	GNPDA1	-1.00057	6.08165	54.3501	7.68824e-05	0.00228675
ENSG00000136802.11	LRRC8A	-0.92897	5.76107	54.3172	7.70473e-05	0.00228703
ENSG00000132434.9	LANCL2	1.05118	4.78671	54.2263	7.75065e-05	0.00229603
ENSG00000100347.14	SAMM50	0.864264	6.56423	53.9432	7.89584e-05	0.00233435
ENSG00000022840.15	RNF10	-0.839122	6.79349	53.8986	7.91901e-05	0.00233633
ENSG00000108298.11	RPL19	-0.867407	10.5422	53.8694	7.93428e-05	0.00233633
ENSG00000169180.11	XPO6	-0.835213	6.94926	53.8073	7.96675e-05	0.00234121
ENSG00000105755.7	ETHE1	-1.22341	3.96159	53.7574	7.993e-05	0.00234424
ENSG00000119922.9	IFIT2	-2.01156	3.13638	53.655	8.04719e-05	0.00235544
ENSG00000197905.8	TEAD4	0.879377	6.68505	53.6068	8.0728e-05	0.00235825
ENSG00000107731.12	UNC5B	-1.99366	2.59744	53.5251	8.11654e-05	0.00236587
ENSG00000198646.13	NCOA6	-1.04871	5.69435	53.4941	8.1332e-05	0.00236587
ENSG00000280416.1	AC009084.3	8.47514	-0.602695	65.8455	8.14709e-05	0.00236587
ENSG00000175221.14	MED16	0.961797	5.4182	53.1778	8.30578e-05	0.0024072
ENSG00000111667.13	USP5	0.771891	8.10771	53.1188	8.33845e-05	0.00241193
ENSG00000169926.10	KLF13	-0.892866	6.07282	53.052	8.37567e-05	0.00241794
ENSG00000119725.18	ZNF410	0.948447	5.5564	52.997	8.40643e-05	0.00242207
ENSG00000101577.9	LPIN2	-1.22527	4.77105	52.9293	8.44456e-05	0.00242594
ENSG00000198888.2	MT-ND1	0.762686	11.7243	52.8975	8.46248e-05	0.00242594
ENSG00000106477.18	CEP41	-1.52023	3.08237	52.8437	8.49302e-05	0.00242594
ENSG00000127824.13	TUBA4A	-0.842716	7.37862	52.8126	8.51073e-05	0.00242594
ENSG00000205544.3	TMEM256	-1.15296	4.41726	52.7582	8.5418e-05	0.00242594
ENSG00000075151.20	EIF4G3	-0.945186	5.41936	52.7563	8.54286e-05	0.00242594
ENSG00000070404.9	FSTL3	-0.800431	9.12099	52.7461	8.54868e-05	0.00242594
ENSG00000148399.12	DPH7	0.966139	5.13329	52.7295	8.5582e-05	0.00242594
ENSG00000115641.18	FHL2	-0.934555	6.47715	52.7122	8.56815e-05	0.00242594
ENSG00000151239.13	TWF1	0.852203	6.89699	52.6015	8.63206e-05	0.00243934
ENSG00000186815.12	TPCN1	-1.05618	6.24724	52.4774	8.7044e-05	0.00245303
ENSG00000131725.13	WDR44	-1.10202	4.53063	52.4614	8.7138e-05	0.00245303
ENSG00000152642.10	GPD1L	-0.94868	5.30205	52.4287	8.73301e-05	0.00245374
ENSG00000133321.10	RARRES3	-3.23529	0.908298	52.3913	8.75506e-05	0.00245525
ENSG00000260401.1	AP002761.4	-2.59269	0.99907	52.237	8.84672e-05	0.00247553
ENSG00000103653.16	CSK	0.815036	7.01707	52.2131	8.86101e-05	0.00247553
ENSG00000149483.11	TMEM138	0.942019	5.29092	52.0773	8.94287e-05	0.00249367
ENSG00000253626.3	EIF5AL1	1.44422	3.10396	51.7705	9.13132e-05	0.00254141
ENSG00000120738.7	EGR1	-1.32322	4.4817	51.6515	9.20575e-05	0.00255236
ENSG00000113721.13	PDGFRB	-1.70532	2.96764	51.6433	9.21087e-05	0.00255236
ENSG00000106261.16	ZKSCAN1	-1.12823	5.06631	51.6246	9.22267e-05	0.00255236
ENSG00000100219.16	XBP1	-0.787187	7.20164	51.5292	9.28298e-05	0.00256061
ENSG00000169851.15	PCDH7	-1.7332	4.6408	56.3386	9.28729e-05	0.00256061
ENSG00000163807.5	KIAA1143	-1.10709	4.51775	51.4488	9.33425e-05	0.00256875
ENSG00000033327.12	GAB2	-1.27862	3.68383	51.3929	9.37008e-05	0.00256961
ENSG00000105568.17	PPP2R1A	0.882324	8.16263	51.3894	9.37229e-05	0.00256961
ENSG00000183955.12	KMT5A	0.88119	6.18445	51.3491	9.39828e-05	0.00256972
ENSG00000126698.10	DNAJC8	1.02306	6.91093	51.33	9.41056e-05	0.00256972
ENSG00000213145.9	CRIP1	-0.911111	5.80733	51.3076	9.42505e-05	0.00256972
ENSG00000162769.12	FLVCR1	0.932376	5.28846	51.2421	9.46761e-05	0.00257476
ENSG00000268173.3	AC007192.1	8.50238	-0.575242	62.8009	9.48205e-05	0.00257476
ENSG00000144231.10	POLR2D	0.847114	6.44489	51.1986	9.49599e-05	0.00257476
ENSG00000107821.14	KAZALD1	-1.22873	3.77945	51.1361	9.53694e-05	0.00258028
ENSG00000138347.15	MYPN	-0.895129	6.92028	51.1073	9.55583e-05	0.00258028
ENSG00000068078.18	FGFR3	-1.12986	4.25149	51.0875	9.56892e-05	0.00258028
ENSG00000137337.14	MDC1	-1.05593	6.59386	50.9965	9.62914e-05	0.00259177
ENSG00000130147.15	SH3BP4	-1.15484	4.118	50.9645	9.65047e-05	0.00259277
ENSG00000061794.12	MRPS35	0.843669	7.01842	50.9102	9.68675e-05	0.00259778
ENSG00000065717.14	TLE2	-1.10931	4.89332	50.8467	9.72937e-05	0.00260446
ENSG00000107937.18	GTPBP4	0.759186	7.6979	50.7299	9.80846e-05	0.00261933
ENSG00000123384.13	LRP1	-1.335	6.93711	56.068	9.8205e-05	0.00261933
ENSG00000107331.16	ABCA2	-0.80994	6.7015	50.6505	9.86271e-05	0.00261933
ENSG00000124535.15	WRNIP1	0.791075	6.89446	50.5765	9.91351e-05	0.00261933
ENSG00000130204.12	TOMM40	0.760742	7.99371	50.5707	9.9175e-05	0.00261933
ENSG00000130714.15	POMT1	1.73823	2.42458	50.5534	9.92945e-05	0.00261933
ENSG00000085117.11	CD82	-1.66003	2.54607	50.5497	9.932e-05	0.00261933
ENSG00000140474.13	ULK3	0.88925	5.99955	50.5487	9.93272e-05	0.00261933
ENSG00000128268.11	MGAT3	-3.39881	0.437543	50.5309	9.94504e-05	0.00261933
ENSG00000073792.15	IGF2BP2	-1.01069	4.82402	50.4543	9.99825e-05	0.00262865
ENSG00000157911.10	PEX10	-1.2938	3.55453	50.376	0.00010053	0.00263638
ENSG00000115539.13	PDCL3	1.04314	4.83143	50.3611	0.000100635	0.00263638
ENSG00000171298.12	GAA	-0.786288	7.1666	50.2777	0.000101223	0.0026418
ENSG00000260868.1	LINC01960	-1.58209	2.64413	50.2709	0.000101271	0.0026418
ENSG00000102893.15	PHKB	-0.983721	5.55866	50.2555	0.00010138	0.0026418
ENSG00000107798.17	LIPA	-1.0661	7.00979	50.1952	0.000101808	0.00264755
ENSG00000156502.13	SUPV3L1	0.823352	6.82529	50.1739	0.00010196	0.00264755
ENSG00000122870.11	BICC1	-1.12286	4.25603	50.1425	0.000102185	0.00264872
ENSG00000182551.13	ADI1	0.792138	7.17648	50.0162	0.000103094	0.00265918
ENSG00000103978.15	TMEM87A	0.92193	5.2805	50.0069	0.000103162	0.00265918
ENSG00000102221.13	JADE3	-0.937687	5.17448	49.9953	0.000103246	0.00265918
ENSG00000150712.10	MTMR12	0.892276	6.41343	49.9863	0.000103311	0.00265918
ENSG00000102241.11	HTATSF1	0.80998	6.76007	49.9373	0.000103667	0.00266369
ENSG00000243725.6	TTC4	0.887017	6.1505	49.8922	0.000103997	0.0026675
ENSG00000066230.11	SLC9A3	-1.16323	4.11104	49.8521	0.000104291	0.0026686
ENSG00000173065.13	FAM222B	-0.980779	4.98055	49.8297	0.000104456	0.0026686
ENSG00000121753.12	ADGRB2	-1.19322	4.59807	49.7888	0.000104757	0.0026686
ENSG00000107021.15	TBC1D13	0.980403	6.29731	49.7878	0.000104765	0.0026686
ENSG00000179029.14	TMEM107	-1.43366	3.12853	49.7326	0.000105173	0.00267191
ENSG00000134744.13	TUT4	-1.15946	4.67899	49.7015	0.000105405	0.00267191
ENSG00000141499.16	WRAP53	0.937612	5.37601	49.6969	0.000105439	0.00267191
ENSG00000135631.16	RAB11FIP5	-0.898739	5.87605	49.5869	0.000106262	0.00267768
ENSG00000220785.7	MTMR9LP	-2.06482	2.25378	49.5623	0.000106447	0.00267768
ENSG00000113070.7	HBEGF	1.22049	3.73861	49.5591	0.000106472	0.00267768
ENSG00000196782.12	MAML3	-1.37071	3.49638	49.5487	0.00010655	0.00267768
ENSG00000126934.13	MAP2K2	0.872991	7.39635	49.5231	0.000106743	0.00267768
ENSG00000025708.13	TYMP	-0.794331	6.76006	49.5212	0.000106758	0.00267768
ENSG00000213949.8	ITGA1	-1.09696	6.02889	49.3267	0.000108242	0.00271027
ENSG00000271787.1	AC104794.4	8.38032	-0.689524	60.2124	0.000108458	0.00271108
ENSG00000160439.15	RDH13	0.915287	5.25152	49.2476	0.000108852	0.00271632
ENSG00000154640.14	BTG3	1.01865	5.14948	49.198	0.000109237	0.00272132
ENSG00000160087.20	UBE2J2	0.87085	5.93943	49.1542	0.000109579	0.00272523
ENSG00000078902.15	TOLLIP	0.916137	5.2506	49.1275	0.000109788	0.00272581
ENSG00000176678.5	FOXL1	-1.96678	1.87656	49.0411	0.000110468	0.00273043
ENSG00000181588.16	MEX3D	1.24538	4.43745	49.0371	0.000110499	0.00273043
ENSG00000162775.14	RBM15	0.928693	5.65902	49.0331	0.00011053	0.00273043
ENSG00000111885.6	MAN1A1	-1.60986	2.50315	49.003	0.000110768	0.00273173
ENSG00000120656.11	TAF12	-1.35052	3.61074	48.9519	0.000111174	0.00273715
ENSG00000154237.12	LRRK1	-1.08762	5.98921	48.8657	0.000111863	0.00274951
ENSG00000021826.15	CPS1	-0.738938	10.6507	48.7461	0.000112827	0.00276857
ENSG00000179218.13	CALR	-0.755658	10.461	48.6443	0.000113655	0.00278012
ENSG00000279092.1	AC025678.3	2.06089	1.58028	48.633	0.000113748	0.00278012
ENSG00000184076.13	UQCR10	0.995212	6.34583	48.6189	0.000113863	0.00278012
ENSG00000261759.1	AC099518.5	8.32421	-0.741728	59.1801	0.000114598	0.00279341
ENSG00000269586.7	CT45A10	1.17527	4.0181	48.3767	0.000115871	0.00281611
ENSG00000273217.1	AC008695.1	-8.25871	-0.753786	58.9683	0.000115911	0.00281611
ENSG00000104679.10	R3HCC1	0.911548	5.26659	48.3443	0.000116143	0.00281708
ENSG00000164327.12	RICTOR	0.908836	5.83617	48.289	0.000116608	0.00282373
ENSG00000168172.8	HOOK3	-1.42144	3.47509	48.176	0.000117568	0.00284229
ENSG00000143153.12	ATP1B1	-0.792791	6.67192	48.0483	0.000118664	0.00286022
ENSG00000164520.11	RAET1E	-1.7008	2.66998	48.0443	0.000118698	0.00286022
ENSG00000110987.8	BCL7A	0.992899	4.73889	47.9935	0.000119138	0.00286242
ENSG00000280287.1	AC131212.3	2.64579	0.833869	47.9888	0.000119179	0.00286242
ENSG00000170653.18	ATF7	-1.02796	5.40901	47.9327	0.000119667	0.00286947
ENSG00000161558.10	TMEM143	-1.73371	2.1453	47.9036	0.000119921	0.00287088
ENSG00000089159.16	PXN	0.742763	7.57828	47.8594	0.000120309	0.00287549
ENSG00000131370.15	SH3BP5	-0.846908	6.44141	47.7986	0.000120844	0.0028836
ENSG00000186470.13	BTN3A2	-0.861753	5.89664	47.772	0.000121079	0.00288455
ENSG00000174013.7	FBXO45	0.917245	5.21179	47.6734	0.000121956	0.00289145
ENSG00000101811.13	CSTF2	0.808972	6.56887	47.6603	0.000122073	0.00289145
ENSG00000101367.8	MAPRE1	0.986771	7.26135	47.6591	0.000122084	0.00289145
ENSG00000100285.9	NEFH	-1.16048	3.99414	47.6511	0.000122155	0.00289145
ENSG00000078061.12	ARAF	-1.00263	6.13587	47.6119	0.000122507	0.00289449
ENSG00000149596.6	JPH2	-1.14371	4.16243	47.5882	0.00012272	0.00289449
ENSG00000125844.15	RRBP1	-0.787863	7.16317	47.5271	0.000123272	0.00289449
ENSG00000121274.12	TENT4B	1.01676	4.63106	47.5173	0.00012336	0.00289449
ENSG00000196204.11	RNF216P1	0.896521	5.59804	47.488	0.000123626	0.00289449
ENSG00000198763.3	MT-ND2	0.725689	12.4423	47.4852	0.000123652	0.00289449
ENSG00000204564.11	C6orf136	1.04042	5.00478	47.4674	0.000123813	0.00289449
ENSG00000179950.13	PUF60	0.728305	8.8222	47.4627	0.000123856	0.00289449
ENSG00000173638.18	SLC19A1	0.829785	6.50836	47.441	0.000124054	0.00289452
ENSG00000129187.14	DCTD	0.873647	6.22707	47.4015	0.000124415	0.00289836
ENSG00000133597.10	ADCK2	1.03193	5.6749	47.2586	0.000125732	0.00291999
ENSG00000236824.2	BCYRN1	1.58576	2.63234	47.2577	0.00012574	0.00291999
ENSG00000134987.11	WDR36	0.851937	6.22491	47.2256	0.000126039	0.00292231
ENSG00000146376.10	ARHGAP18	-1.26662	3.57395	47.1544	0.000126703	0.00293241
ENSG00000113068.9	PFDN1	-0.914156	5.56125	47.1364	0.000126873	0.00293241
ENSG00000153814.12	JAZF1	-1.29442	3.36627	47.0721	0.000127477	0.00293825
ENSG00000142541.16	RPL13A	-0.852655	10.6976	47.0672	0.000127524	0.00293825
ENSG00000124496.12	TRERF1	-0.924139	5.10318	46.9658	0.000128486	0.00295409
ENSG00000152684.10	PELO	0.84132	6.72875	46.9496	0.000128641	0.00295409
ENSG00000197063.10	MAFG	0.857606	5.83948	46.9315	0.000128814	0.00295409
ENSG00000156253.6	RWDD2B	-1.23548	4.82393	46.9051	0.000129066	0.00295528
ENSG00000106554.12	CHCHD3	0.808457	6.457	46.8515	0.000129582	0.00296035
ENSG00000112531.16	QKI	-1.0324	5.02364	46.8402	0.00012969	0.00296035
ENSG00000163472.18	TMEM79	1.13635	4.18325	46.7456	0.000130607	0.00297248
ENSG00000184384.13	MAML2	-1.92205	2.37894	46.7437	0.000130625	0.00297248
ENSG00000124532.14	MRS2	0.871821	5.8314	46.6577	0.000131466	0.00298635
ENSG00000088727.12	KIF9	1.19282	3.73264	46.6399	0.00013164	0.00298635
ENSG00000173727.12	AP000769.1	-1.09947	4.20998	46.5765	0.000132265	0.00299591
ENSG00000120211.4	INSL4	-1.60457	2.50443	46.5103	0.000132922	0.00300197
ENSG00000046604.12	DSG2	-1.25483	6.23162	47.7578	0.000133015	0.00300197
ENSG00000159388.5	BTG2	-0.860555	5.68766	46.4488	0.000133536	0.00300197
ENSG00000136897.7	MRPL50	0.892276	5.25904	46.4484	0.000133539	0.00300197
ENSG00000152377.13	SPOCK1	-1.47064	5.00075	49.4971	0.000133552	0.00300197
ENSG00000198890.8	PRMT6	-0.918917	5.18023	46.3995	0.00013403	0.00300811
ENSG00000177548.12	RABEP2	1.17504	3.76005	46.3447	0.000134582	0.00301231
ENSG00000111269.2	CREBL2	-0.890086	6.34893	46.3366	0.000134664	0.00301231
ENSG00000013588.8	GPRC5A	1.46836	9.9331	59.3901	0.000134905	0.00301231
ENSG00000197858.10	GPAA1	-0.737119	7.3305	46.2839	0.000135198	0.00301231
ENSG00000139437.17	TCHP	0.987959	4.64649	46.2798	0.00013524	0.00301231
ENSG00000100591.7	AHSA1	0.741646	7.9911	46.1237	0.000136838	0.00303615
ENSG00000188660.3	LINC00319	-1.74547	3.19841	46.0956	0.000137128	0.00303615
ENSG00000196363.9	WDR5	0.756225	6.97049	46.0826	0.000137263	0.00303615
ENSG00000024526.16	DEPDC1	-0.890231	5.62395	46.0771	0.00013732	0.00303615
ENSG00000125977.6	EIF2S2	0.730925	7.46378	46.075	0.000137341	0.00303615
ENSG00000145414.8	NAF1	1.0554	4.77724	46.0263	0.000137847	0.00303743
ENSG00000161204.11	ABCF3	0.790019	7.12487	46.026	0.00013785	0.00303743
ENSG00000275700.4	AATF	0.749974	6.98277	45.9995	0.000138126	0.00303743
ENSG00000244005.12	NFS1	0.829477	6.72926	45.9889	0.000138237	0.00303743
ENSG00000167535.7	CACNB3	-0.969908	5.05179	45.9591	0.000138549	0.00303743
ENSG00000151553.14	FAM160B1	1.10338	4.12405	45.9507	0.000138637	0.00303743
ENSG00000146674.14	IGFBP3	-1.02774	4.86764	45.9093	0.000139071	0.00304242
ENSG00000131148.8	EMC8	0.853666	5.73129	45.8869	0.000139307	0.00304306
ENSG00000176407.17	KCMF1	0.818292	6.32419	45.8168	0.000140049	0.00305473
ENSG00000167191.11	GPRC5B	-1.56786	2.43189	45.771	0.000140537	0.00305871
ENSG00000254721.1	AP000879.1	5.35579	-0.586959	45.7607	0.000140647	0.00305871
ENSG00000165887.11	ANKRD2	-1.67586	2.32529	45.6706	0.000141613	0.00307517
ENSG00000067182.7	TNFRSF1A	0.72249	8.06168	45.6368	0.000141977	0.00307854
ENSG00000001617.11	SEMA3F	-1.16303	6.23487	45.6064	0.000142306	0.00308114
ENSG00000100416.13	TRMU	0.798853	6.48051	45.5527	0.000142889	0.00308256
ENSG00000272335.1	AC093297.2	-2.25842	1.3144	45.5319	0.000143116	0.00308256
ENSG00000141639.11	MAPK4	-1.06866	6.81583	45.525	0.000143192	0.00308256
ENSG00000090470.14	PDCD7	0.902646	5.36939	45.5233	0.000143209	0.00308256
ENSG00000117983.17	MUC5B	-2.14737	1.68426	45.4759	0.000143729	0.00308923
ENSG00000112312.9	GMNN	-0.882366	5.3877	45.442	0.000144101	0.00309272
ENSG00000158106.13	RHPN1	-1.13193	4.91878	45.4027	0.000144534	0.00309748
ENSG00000270276.2	HIST2H4B	-2.77673	1.63562	45.3354	0.00014528	0.00310163
ENSG00000102699.5	PARP4	-0.9226	5.87663	45.3212	0.000145437	0.00310163
ENSG00000147676.13	MAL2	-1.83047	1.99001	45.292	0.000145763	0.00310163
ENSG00000070761.7	CFAP20	0.850055	5.84973	45.277	0.000145931	0.00310163
ENSG00000172757.12	CFL1	0.76468	9.75451	45.2737	0.000145968	0.00310163
ENSG00000145050.16	MANF	-0.82878	6.05015	45.2716	0.000145991	0.00310163
ENSG00000114648.11	KLHL18	0.905423	6.08544	45.1606	0.000147239	0.00312362
ENSG00000135070.14	ISCA1	0.807633	6.28049	45.0582	0.000148402	0.00314231
ENSG00000166123.13	GPT2	0.809145	6.2805	45.034	0.000148679	0.00314231
ENSG00000158555.14	GDPD5	-1.11585	4.2961	45.0121	0.000148929	0.00314231
ENSG00000110330.8	BIRC2	0.925189	4.92727	45.0083	0.000148973	0.00314231
ENSG00000181856.14	SLC2A4	-1.64119	2.46198	44.9036	0.000150181	0.00316325
ENSG00000197008.9	ZNF138	1.82726	2.07426	44.8828	0.000150422	0.0031635
ENSG00000148154.9	UGCG	1.07076	4.94779	44.8486	0.000150819	0.0031635
ENSG00000132792.18	CTNNBL1	0.84826	6.07507	44.847	0.000150837	0.0031635
ENSG00000111261.13	MANSC1	-1.82637	1.84268	44.7746	0.000151684	0.00317674
ENSG00000128833.12	MYO5C	-1.08532	4.16032	44.7144	0.000152393	0.00318704
ENSG00000157869.14	RAB28	-1.63881	2.22568	44.648	0.000153178	0.00319565
ENSG00000119917.13	IFIT3	-1.25097	3.73493	44.643	0.000153238	0.00319565
ENSG00000169499.14	PLEKHA2	-0.848315	6.06644	44.5824	0.00015396	0.00319946
ENSG00000162430.16	SELENON	-0.818131	6.29727	44.5749	0.000154049	0.00319946
ENSG00000164610.8	RP9	1.05721	4.36093	44.5587	0.000154244	0.00319946
ENSG00000232677.6	LINC00665	1.16013	4.46855	44.5548	0.00015429	0.00319946
ENSG00000162591.15	MEGF6	-1.70263	2.23269	44.4739	0.000155263	0.00321511
ENSG00000168140.4	VASN	-0.862039	5.33783	44.4553	0.000155488	0.00321525
ENSG00000078668.13	VDAC3	0.740282	6.96281	44.4208	0.000155907	0.00321901
ENSG00000088038.18	CNOT3	-0.866307	5.25664	44.4043	0.000156107	0.00321901
ENSG00000035141.7	FAM136A	0.763145	6.74318	44.3709	0.000156513	0.00322286
ENSG00000151725.11	CENPU	1.13114	4.1453	44.3188	0.000157151	0.00322869
ENSG00000176422.13	SPRYD4	-1.12066	3.9206	44.312	0.000157235	0.00322869
ENSG00000115350.11	POLE4	0.895341	5.18991	44.2848	0.000157569	0.00323104
ENSG00000008441.16	NFIX	-1.08639	4.07143	44.246	0.000158047	0.00323487
ENSG00000206075.13	SERPINB5	-1.19459	3.84959	44.2052	0.000158551	0.00323487
ENSG00000130560.8	UBAC1	0.762028	6.6626	44.1277	0.000159516	0.00323487
ENSG00000154945.6	ANKRD40	-0.958724	5.26517	44.1049	0.000159801	0.00323487
ENSG00000171914.16	TLN2	-1.20956	4.88322	44.0548	0.00016043	0.00323487
ENSG00000151503.12	NCAPD3	-0.745066	6.79831	44.0515	0.000160471	0.00323487
ENSG00000145833.15	DDX46	-0.83075	6.34	44.0389	0.000160631	0.00323487
ENSG00000108515.17	ENO3	-1.40281	5.86199	48.3457	0.000160721	0.00323487
ENSG00000223573.7	TINCR	-1.24654	4.41481	44.0227	0.000160834	0.00323487
ENSG00000129657.15	SEC14L1	-0.753444	7.09614	44.0171	0.000160906	0.00323487
ENSG00000258366.8	RTEL1	0.8519	5.3865	43.9989	0.000161135	0.00323487
ENSG00000163812.13	ZDHHC3	0.734065	6.97349	43.9986	0.000161139	0.00323487
ENSG00000070915.9	SLC12A3	-1.24321	3.52285	43.994	0.000161197	0.00323487
ENSG00000104998.3	IL27RA	-0.938411	6.40367	43.9939	0.000161199	0.00323487
ENSG00000120833.13	SOCS2	1.43645	5.1764	47.774	0.000161239	0.00323487
ENSG00000185022.11	MAFF	0.940445	5.30209	43.9867	0.000161289	0.00323487
ENSG00000055208.18	TAB2	-0.922766	4.92962	43.9709	0.000161491	0.00323487
ENSG00000123395.14	ATG101	0.822495	6.62238	43.9492	0.000161766	0.00323598
ENSG00000013563.13	DNASE1L1	-0.950355	4.7059	43.9243	0.000162083	0.00323771
ENSG00000116161.17	CACYBP	0.705033	7.93399	43.9079	0.000162292	0.00323771
ENSG00000137752.23	CASP1	-3.1743	0.21162	43.8783	0.000162671	0.00324087
ENSG00000101160.13	CTSZ	-0.713762	8.96687	43.8133	0.000163505	0.00325309
ENSG00000123838.10	C4BPA	-1.79048	1.97641	43.7795	0.000163941	0.00325736
ENSG00000122643.19	NT5C3A	0.935368	5.17312	43.7609	0.000164183	0.00325777
ENSG00000166741.7	NNMT	0.748045	7.71774	43.7061	0.000164894	0.00326699
ENSG00000155189.11	AGPAT5	0.95757	4.65928	43.6784	0.000165255	0.00326699
ENSG00000168461.12	RAB31	-0.847527	5.63765	43.6693	0.000165374	0.00326699
ENSG00000127946.16	HIP1	-0.832128	6.43493	43.6465	0.000165672	0.00326699
ENSG00000164054.15	SHISA5	-0.748431	7.26642	43.64	0.000165757	0.00326699
ENSG00000092068.19	SLC7A8	-1.23927	3.48693	43.5719	0.000166654	0.0032783
ENSG00000239264.8	TXNDC5	0.787307	9.30173	43.5626	0.000166776	0.0032783
ENSG00000056972.18	TRAF3IP2	-0.928508	5.02427	43.5437	0.000167026	0.00327883
ENSG00000148730.6	EIF4EBP2	-1.28317	6.41231	47.2011	0.00016781	0.00328762
ENSG00000147459.17	DOCK5	-1.20988	5.76831	43.476	0.000167924	0.00328762
ENSG00000117318.8	ID3	-0.713729	7.46166	43.4596	0.000168144	0.00328762
ENSG00000128567.16	PODXL	-0.965809	7.9081	43.3531	0.000169572	0.00331115
ENSG00000277258.4	PCGF2	-0.914451	5.1867	43.2767	0.000170606	0.00332232
ENSG00000204130.13	RUFY2	1.45102	2.86664	43.2645	0.000170772	0.00332232
ENSG00000160691.18	SHC1	-0.736458	7.69189	43.2457	0.000171027	0.00332232
ENSG00000084710.13	EFR3B	-0.885798	5.09662	43.2443	0.000171047	0.00332232
ENSG00000132846.5	ZBED3	-1.13131	4.46504	43.2196	0.000171384	0.00332448
ENSG00000134109.10	EDEM1	0.880012	5.5111	43.1985	0.000171672	0.0033257
ENSG00000167107.12	ACSF2	-1.08821	4.98949	43.0997	0.000173032	0.00333795
ENSG00000196810.4	CTBP1-DT	-1.68368	2.8564	43.087	0.000173208	0.00333795
ENSG00000271303.1	SRXN1	0.767914	6.5271	43.0788	0.000173322	0.00333795
ENSG00000105993.14	DNAJB6	0.729407	7.05385	43.0501	0.00017372	0.00333795
ENSG00000155115.6	GTF3C6	0.861973	5.97604	43.0449	0.000173792	0.00333795
ENSG00000127533.3	F2RL3	-1.90257	1.6259	43.0397	0.000173865	0.00333795
ENSG00000134452.19	FBH1	-0.801845	6.0863	43.0197	0.000174143	0.00333795
ENSG00000161939.19	RNASEK-C17orf49	1.71287	2.20284	43.0044	0.000174356	0.00333795
ENSG00000102007.10	PLP2	-0.707904	7.40839	42.9978	0.000174449	0.00333795
ENSG00000167528.12	ZNF641	-1.0497	4.75449	42.989	0.000174572	0.00333795
ENSG00000180979.9	LRRC57	1.12262	3.88274	42.9532	0.000175073	0.00334293
ENSG00000141985.9	SH3GL1	0.771355	6.54311	42.9162	0.000175593	0.00334293
ENSG00000122642.10	FKBP9	-0.876275	6.43188	42.905	0.000175751	0.00334293
ENSG00000131746.12	TNS4	-1.10351	4.13726	42.9042	0.000175763	0.00334293
ENSG00000115310.17	RTN4	-0.770801	7.3573	42.8897	0.000175968	0.00334293
ENSG00000105618.13	PRPF31	0.742048	6.85661	42.8638	0.000176333	0.00334556
ENSG00000122490.18	PQLC1	0.907925	5.15844	42.8296	0.000176818	0.00334632
ENSG00000140577.15	CRTC3	-0.74257	6.71818	42.8199	0.000176956	0.00334632
ENSG00000184985.16	SORCS2	-1.26607	3.18544	42.813	0.000177055	0.00334632
ENSG00000150961.14	SEC24D	-0.871393	5.36566	42.7856	0.000177445	0.00334678
ENSG00000101236.16	RNF24	-0.901959	5.02613	42.7793	0.000177534	0.00334678
ENSG00000184203.7	PPP1R2	-0.957795	5.56849	42.7372	0.000178137	0.00335386
ENSG00000128245.14	YWHAH	0.730283	6.86665	42.6894	0.000178825	0.00336251
ENSG00000147416.10	ATP6V1B2	0.817181	6.18153	42.6137	0.00017992	0.00337878
ENSG00000071967.11	CYBRD1	-1.38806	3.0405	42.5344	0.000181075	0.0033854
ENSG00000171603.17	CLSTN1	-0.883284	6.98992	42.5138	0.000181378	0.0033854
ENSG00000110080.18	ST3GAL4	0.774504	6.39425	42.4844	0.000181809	0.0033854
ENSG00000075643.5	MOCOS	-0.719694	7.07584	42.4761	0.000181931	0.0033854
ENSG00000180776.15	ZDHHC20	-1.24532	4.12875	42.4721	0.00018199	0.0033854
ENSG00000256569.1	AC069234.3	-7.97286	-1.00885	51.1172	0.000182009	0.0033854
ENSG00000272933.1	AL391121.1	7.95519	-1.07526	51.1164	0.000182018	0.0033854
ENSG00000144810.15	COL8A1	-3.9944	-0.528409	42.4638	0.000182112	0.0033854
ENSG00000110218.8	PANX1	0.943368	5.2306	42.4229	0.000182717	0.00339091
ENSG00000100296.13	THOC5	-0.824289	6.07655	42.4091	0.000182922	0.00339091
ENSG00000266074.8	BAHCC1	-0.868479	5.11502	42.3971	0.000183099	0.00339091
ENSG00000115486.11	GGCX	-0.862771	5.73752	42.3812	0.000183336	0.00339103
ENSG00000033050.8	ABCF2	0.716907	7.72699	42.3121	0.000184367	0.003405
ENSG00000084623.11	EIF3I	0.729309	8.43606	42.2905	0.00018469	0.003405
ENSG00000145216.15	FIP1L1	0.89778	5.72817	42.2678	0.000185031	0.003405
ENSG00000269386.5	RAB11B-AS1	1.65022	2.26004	42.2569	0.000185196	0.003405
ENSG00000116985.11	BMP8B	-1.22014	3.39535	42.2508	0.000185288	0.003405
ENSG00000146576.12	C7orf26	0.974967	4.49561	42.2381	0.000185479	0.003405
ENSG00000139289.13	PHLDA1	1.07357	5.68147	42.1749	0.000186435	0.00341829
ENSG00000141873.10	SLC39A3	0.888184	5.03183	42.1573	0.000186702	0.00341893
ENSG00000283228.1	AC068547.1	1.47587	2.49626	42.0824	0.000187846	0.00342899
ENSG00000186522.14	2021-09-10	-0.88631	5.11525	42.0618	0.000188161	0.00342899
ENSG00000185745.9	IFIT1	-1.11926	3.796	42.052	0.000188313	0.00342899
ENSG00000196739.14	COL27A1	-0.88172	5.06351	42.0508	0.00018833	0.00342899
ENSG00000073331.17	ALPK1	-1.63156	2.14845	42.0452	0.000188416	0.00342899
ENSG00000239857.6	GET4	0.795703	6.12357	42.0187	0.000188825	0.00343218
ENSG00000055609.17	KMT2C	-1.47156	5.1662	46.5774	0.000189546	0.00344104
ENSG00000261609.6	GAN	1.15117	4.22776	41.9357	0.00019011	0.00344703
ENSG00000229953.1	AL590666.2	-1.62086	2.72292	41.899	0.000190683	0.00344996
ENSG00000239305.6	RNF103	1.0198	4.45857	41.8953	0.00019074	0.00344996
ENSG00000109689.15	STIM2	1.065	4.39847	41.7814	0.000192531	0.00347807
ENSG00000205763.13	RP9P	1.25683	3.17926	41.738	0.000193218	0.00348025
ENSG00000187017.16	ESPN	-1.63769	2.80003	41.7178	0.000193539	0.00348025
ENSG00000100299.17	ARSA	-1.09126	3.95812	41.7144	0.000193593	0.00348025
ENSG00000107949.16	BCCIP	0.801522	6.09895	41.7014	0.0001938	0.00348025
ENSG00000131876.16	SNRPA1	0.936068	6.66049	41.6993	0.000193833	0.00348025
ENSG00000104131.12	EIF3J	0.766259	6.41224	41.6758	0.000194208	0.00348273
ENSG00000189376.11	C8orf76	0.991214	4.37144	41.6364	0.000194839	0.00348979
ENSG00000136235.16	GPNMB	-0.824923	5.92027	41.5988	0.000195444	0.00349638
ENSG00000111802.13	TDP2	0.830503	5.31898	41.5636	0.000196011	0.00349856
ENSG00000171680.21	PLEKHG5	-1.24031	3.34363	41.5617	0.000196041	0.00349856
ENSG00000141179.13	PCTP	1.10573	3.90112	41.4968	0.000197094	0.0035131
ENSG00000072840.12	EVC	-1.41492	3.45081	41.4689	0.000197548	0.00351693
ENSG00000115252.18	PDE1A	-1.0072	4.38603	41.3723	0.000199133	0.00354087
ENSG00000150995.19	ITPR1	-0.874337	5.86612	41.3263	0.000199894	0.00354902
ENSG00000134453.15	RBM17	0.744695	6.56178	41.3128	0.000200118	0.00354902
ENSG00000151388.10	ADAMTS12	-1.668	2.48952	41.2955	0.000200405	0.00354902
ENSG00000172893.15	DHCR7	0.881018	6.94849	41.2851	0.000200577	0.00354902
ENSG00000038219.12	BOD1L1	-1.03997	4.68342	41.2719	0.000200797	0.00354902
ENSG00000164258.11	NDUFS4	0.888422	5.21582	41.256	0.000201063	0.00354946
ENSG00000167770.11	OTUB1	0.757725	6.43051	41.2072	0.000201879	0.0035565
ENSG00000165124.17	SVEP1	-2.14854	5.38232	59.5677	0.000201945	0.0035565
ENSG00000138279.15	ANXA7	0.698219	7.26613	41.1701	0.000202502	0.00356206
ENSG00000172780.16	RAB43	-1.28506	3.0326	41.1354	0.000203087	0.00356808
ENSG00000136875.12	PRPF4	0.717516	7.08239	41.0828	0.000203979	0.00357259
ENSG00000079257.7	LXN	-1.29724	5.23799	42.8209	0.000204437	0.00357259
ENSG00000163840.9	DTX3L	-0.928387	5.16019	41.0515	0.00020451	0.00357259
ENSG00000164172.18	MOCS2	0.826611	5.73268	41.038	0.000204741	0.00357259
ENSG00000141756.18	FKBP10	-0.68264	8.87046	41.0353	0.000204787	0.00357259
ENSG00000083799.17	CYLD	0.84972	5.13194	41.0346	0.000204799	0.00357259
ENSG00000237412.6	PRSS56	-0.797447	9.96684	41.0137	0.000205155	0.00357456
ENSG00000141380.13	SS18	-0.836732	5.3853	40.9824	0.000205693	0.00357918
ENSG00000278259.4	MYO19	-0.738676	6.69677	40.9699	0.000205907	0.00357918
ENSG00000118985.15	ELL2	0.74115	7.03161	40.8401	0.000208153	0.00361396
ENSG00000197601.12	FAR1	0.825361	5.37215	40.7882	0.00020906	0.00362544
ENSG00000272668.2	AL590560.1	-1.65053	2.0562	40.7718	0.000209347	0.00362614
ENSG00000138867.16	GUCD1	-0.758287	6.54673	40.7237	0.000210193	0.00363651
ENSG00000172037.13	LAMB2	-0.685013	7.49355	40.6339	0.000211784	0.00365974
ENSG00000074621.13	SLC24A1	-1.39082	3.02016	40.6014	0.000212364	0.00366546
ENSG00000124831.18	LRRFIP1	-0.992038	5.07658	40.5708	0.000212911	0.0036706
ENSG00000243649.8	CFB	-0.964218	4.61531	40.5303	0.000213639	0.00367698
ENSG00000183508.4	TENT5C	-0.778883	6.29274	40.5189	0.000213845	0.00367698
ENSG00000113916.17	BCL6	-1.09058	4.31842	40.5086	0.00021403	0.00367698
ENSG00000145391.13	SETD7	-0.990835	6.25771	40.4546	0.000215008	0.00368446
ENSG00000133961.20	NUMB	-1.03026	5.16659	40.4482	0.000215123	0.00368446
ENSG00000120451.10	SNX19	-1.13593	3.6631	40.4431	0.000215217	0.00368446
ENSG00000161955.16	TNFSF13	-1.09824	3.75089	40.3996	0.000216008	0.00369371
ENSG00000115596.3	WNT6	-1.72917	2.96174	40.3633	0.000216672	0.00370077
ENSG00000143842.14	SOX13	-0.798191	5.76519	40.2949	0.000217929	0.00371792
ENSG00000145632.14	PLK2	-0.758405	8.2106	40.1548	0.000220534	0.00375801
ENSG00000166483.10	WEE1	0.827591	5.37102	40.0936	0.000221684	0.00377323
ENSG00000006432.15	MAP3K9	-1.27435	4.56237	40.0531	0.000222449	0.00378189
ENSG00000149639.14	SOGA1	-1.0516	6.35986	39.9946	0.000223558	0.00379503
ENSG00000156853.12	ZNF689	0.980806	4.37755	39.9852	0.000223738	0.00379503
ENSG00000265190.6	ANXA8	-0.99253	4.29035	39.9583	0.000224252	0.00379937
ENSG00000183605.16	SFXN4	0.787199	5.89856	39.935	0.000224697	0.00380255
ENSG00000169992.9	NLGN2	-0.803466	5.98532	39.9065	0.000225245	0.00380744
ENSG00000111845.4	PAK1IP1	0.811326	6.10691	39.7952	0.000227398	0.00383943
ENSG00000159346.12	ADIPOR1	0.666973	7.91645	39.7733	0.000227824	0.00384222
ENSG00000136205.16	TNS3	-0.775182	6.44973	39.6982	0.000229296	0.00386094
ENSG00000074047.21	GLI2	-2.71853	0.530323	39.6899	0.000229459	0.00386094
ENSG00000089157.15	RPLP0	-0.674946	11.4373	39.6444	0.000230356	0.00386219
ENSG00000134363.11	FST	2.07565	1.28778	39.6335	0.000230572	0.00386219
ENSG00000142798.19	HSPG2	-1.51612	7.79271	51.7343	0.000230767	0.00386219
ENSG00000154734.14	ADAMTS1	-1.22178	3.48935	39.6094	0.00023105	0.00386219
ENSG00000157764.13	BRAF	0.82901	5.19116	39.607	0.000231098	0.00386219
ENSG00000124107.5	SLPI	-1.16499	3.86262	39.6026	0.000231186	0.00386219
ENSG00000137492.7	THAP12	0.87024	5.76932	39.5933	0.00023137	0.00386219
ENSG00000165322.17	ARHGAP12	-1.22406	4.0175	39.5464	0.000232304	0.00387341
ENSG00000120158.11	RCL1	0.804894	5.75796	39.5266	0.0002327	0.00387562
ENSG00000108439.10	PNPO	-0.805687	5.45008	39.4831	0.000233574	0.00388521
ENSG00000150764.13	DIXDC1	-1.0815	4.17438	39.4717	0.000233804	0.00388521
ENSG00000101400.5	SNTA1	-1.01045	4.37817	39.4584	0.000234071	0.00388527
ENSG00000170734.11	POLH	-1.01033	4.5154	39.4357	0.00023453	0.0038885
ENSG00000099260.10	PALMD	-1.04402	4.47255	39.3748	0.000235765	0.00390011
ENSG00000181458.10	TMEM45A	-0.796159	5.67065	39.3675	0.000235914	0.00390011
ENSG00000127314.17	RAP1B	0.713897	6.69838	39.3621	0.000236025	0.00390011
ENSG00000180357.9	ZNF609	-0.997212	6.55145	39.3288	0.000236705	0.00390412
ENSG00000141664.9	ZCCHC2	-1.25416	4.03799	39.3242	0.000236798	0.00390412
ENSG00000121236.20	TRIM6	-1.11771	3.79807	39.3039	0.000237216	0.00390663
ENSG00000065357.19	DGKA	-1.05073	3.92933	39.269	0.000237933	0.00391406
ENSG00000185825.16	BCAP31	0.673264	8.03792	39.2301	0.000238734	0.00392077
ENSG00000272788.1	AP000864.1	2.67494	0.323828	39.2234	0.000238873	0.00392077
ENSG00000116747.12	TROVE2	0.855719	5.07146	39.1987	0.000239385	0.00392479
ENSG00000163939.18	PBRM1	-1.19822	4.83681	39.1768	0.00023984	0.00392787
ENSG00000105229.6	PIAS4	0.852219	5.0651	39.1392	0.000240623	0.00393632
ENSG00000141429.13	GALNT1	-0.982557	4.73716	39.111	0.000241214	0.00394161
ENSG00000170921.15	TANC2	-1.2259	6.07905	42.1065	0.000241792	0.00394667
ENSG00000100207.18	TCF20	-0.983591	6.34174	39.0581	0.000242324	0.00394826
ENSG00000265763.3	ZNF488	-1.35244	2.68877	39.0533	0.000242426	0.00394826
ENSG00000132964.11	CDK8	0.944472	4.44682	38.9924	0.000243713	0.00396485
ENSG00000110880.10	CORO1C	-0.766226	7.20886	38.9389	0.000244853	0.003979
ENSG00000146872.17	TLK2	0.833477	5.30674	38.9193	0.000245271	0.00398139
ENSG00000154978.12	VOPP1	0.725174	6.70892	38.8788	0.000246139	0.00399109
ENSG00000244731.7	C4A	-1.38944	2.57142	38.8619	0.000246504	0.0039926
ENSG00000181104.6	F2R	-1.43887	2.45789	38.8273	0.000247249	0.0039934
ENSG00000163584.17	RPL22L1	-0.79577	6.04399	38.8165	0.000247483	0.0039934
ENSG00000135823.13	STX6	0.765197	6.01405	38.8107	0.000247608	0.0039934
ENSG00000173227.13	SYT12	-0.760486	6.11823	38.8093	0.000247638	0.0039934
ENSG00000068745.14	IP6K2	0.772474	6.18194	38.7171	0.000249645	0.00401979
ENSG00000141030.12	COPS3	0.703162	7.08554	38.709	0.00024982	0.00401979
ENSG00000173511.9	VEGFB	-0.915909	4.699	38.682	0.000250412	0.00402491
ENSG00000124257.6	NEURL2	-3.5557	-0.364345	38.6529	0.000251053	0.00403082
ENSG00000182578.13	CSF1R	-1.59376	2.08269	38.6328	0.000251495	0.00403351
ENSG00000050748.17	MAPK9	-0.834386	5.44502	38.5891	0.000252464	0.00404324
ENSG00000100029.17	PES1	0.660305	8.51202	38.5806	0.000252651	0.00404324
ENSG00000108961.13	RANGRF	0.825355	5.1309	38.5536	0.000253251	0.00404845
ENSG00000144867.11	SRPRB	0.721721	6.70255	38.5183	0.00025404	0.00405664
ENSG00000205572.9	SERF1B	0.89251	5.76791	38.4533	0.000255496	0.00407547
ENSG00000128573.24	FOXP2	-3.16326	0.0476965	38.3615	0.000257573	0.00410148
ENSG00000275993.2	SIK1B	0.655546	8.63975	38.3476	0.000257889	0.00410148
ENSG00000143799.12	PARP1	0.65884	9.15788	38.3444	0.000257962	0.00410148
ENSG00000125107.17	CNOT1	-0.793005	7.75207	38.3128	0.000258684	0.00410833
ENSG00000169925.16	BRD3	-0.804016	5.28713	38.2952	0.000259087	0.00410833
ENSG00000174442.11	ZWILCH	-0.814705	5.36832	38.2889	0.00025923	0.00410833
ENSG00000101000.5	PROCR	-0.895877	5.97772	38.2647	0.000259786	0.00411231
ENSG00000160325.14	CACFD1	1.10186	3.6236	38.2537	0.000260039	0.00411231
ENSG00000156463.17	SH3RF2	-1.49498	2.37671	38.2368	0.000260427	0.00411403
ENSG00000173264.14	GPR137	0.928981	4.50826	38.1826	0.000261681	0.0041294
ENSG00000159314.11	ARHGAP27	0.825522	5.24586	38.1648	0.000262094	0.00413149
ENSG00000124145.6	SDC4	0.727877	6.81118	38.1447	0.000262562	0.00413263
ENSG00000170153.10	RNF150	-1.05125	3.91951	38.1244	0.000263036	0.00413263
ENSG00000179958.8	DCTPP1	0.754505	6.06875	38.1189	0.000263165	0.00413263
ENSG00000172409.5	CLP1	0.812331	5.24076	38.1136	0.000263289	0.00413263
ENSG00000117016.9	RIMS3	-1.28521	2.93754	38.0826	0.000264013	0.00413623
ENSG00000116852.14	KIF21B	-1.07638	3.69983	38.0798	0.00026408	0.00413623
ENSG00000048028.11	USP28	-0.955338	4.49726	38.0225	0.000265429	0.00414898
ENSG00000117262.18	GPR89A	0.97878	4.72449	38.0212	0.000265458	0.00414898
ENSG00000116574.5	RHOU	-1.35789	3.97843	37.9749	0.000266555	0.00416171
ENSG00000092758.17	COL9A3	-1.69703	3.25223	37.9074	0.000268161	0.0041734
ENSG00000080503.23	SMARCA2	-0.851759	5.76585	37.9031	0.000268265	0.0041734
ENSG00000111231.8	GPN3	0.970073	4.5352	37.8931	0.000268506	0.0041734
ENSG00000143952.19	VPS54	0.898862	4.64857	37.8846	0.000268709	0.0041734
ENSG00000107159.12	CA9	-1.77593	3.09047	37.8841	0.000268721	0.0041734
ENSG00000105176.17	URI1	0.845554	6.04275	37.8662	0.00026915	0.00417566
ENSG00000150459.12	SAP18	0.724639	6.63877	37.796	0.000270844	0.00419331
ENSG00000164574.15	GALNT10	-1.0704	5.70827	37.7869	0.000271064	0.00419331
ENSG00000188211.8	NCR3LG1	-1.7058	2.1893	37.7836	0.000271143	0.00419331
ENSG00000086061.15	DNAJA1	0.798346	8.38754	37.742	0.000272155	0.00420387
ENSG00000177565.16	TBL1XR1	-0.791522	5.38314	37.7236	0.000272602	0.00420387
ENSG00000275183.1	LENG9	-1.52254	2.28235	37.7204	0.000272682	0.00420387
ENSG00000161981.10	SNRNP25	0.767627	6.20348	37.6586	0.000274195	0.00422278
ENSG00000185298.12	CCDC137	0.76	6.53412	37.6347	0.000274783	0.00422741
ENSG00000049245.12	VAMP3	0.747976	6.19973	37.5767	0.000276217	0.00424126
ENSG00000013288.8	MAN2B2	-0.952757	4.85229	37.575	0.00027626	0.00424126
ENSG00000089820.15	ARHGAP4	-0.794936	5.28288	37.5576	0.000276691	0.00424347
ENSG00000105929.16	ATP6V0A4	-1.53266	2.26391	37.5198	0.000277634	0.00424947
ENSG00000060237.16	WNK1	-0.782944	8.1158	37.5188	0.00027766	0.00424947
ENSG00000167105.7	TMEM92	-1.75087	2.33537	37.4467	0.000279467	0.00427268
ENSG00000116514.16	RNF19B	0.929144	4.9829	37.3693	0.000281424	0.00429813
ENSG00000169231.13	THBS3	-1.13976	3.33705	37.3438	0.000282074	0.00430189
ENSG00000103479.15	RBL2	-0.830949	5.16198	37.3269	0.000282505	0.00430189
ENSG00000021574.12	SPAST	0.897235	4.94891	37.3236	0.000282588	0.00430189
ENSG00000164430.15	CGAS	0.787415	5.574	37.3138	0.000282839	0.00430189
ENSG00000111846.17	GCNT2	-0.859705	5.18736	37.284	0.000283602	0.00430905
ENSG00000110911.15	SLC11A2	-0.705798	6.58929	37.2287	0.000285024	0.00432321
ENSG00000013275.7	PSMC4	0.689674	7.52406	37.204	0.000285664	0.00432321
ENSG00000072163.19	LIMS2	-1.25978	2.92087	37.2024	0.000285704	0.00432321
ENSG00000111726.12	CMAS	-0.821588	5.0972	37.1949	0.000285899	0.00432321
ENSG00000036672.15	USP2	-1.26351	2.94927	37.1909	0.000286002	0.00432321
ENSG00000158290.16	CUL4B	0.751171	6.0674	37.1653	0.000286665	0.00432533
ENSG00000169554.19	ZEB2	-1.68525	1.91535	37.1629	0.00028673	0.00432533
ENSG00000121058.4	COIL	0.780701	5.67554	37.1355	0.000287442	0.00432722
ENSG00000126767.17	ELK1	-0.748814	6.09117	37.1355	0.000287443	0.00432722
ENSG00000116688.16	MFN2	0.662831	7.41114	37.0874	0.000288701	0.00433894
ENSG00000163811.11	WDR43	0.730083	7.10217	37.0643	0.000289306	0.00433894
ENSG00000007168.12	PAFAH1B1	0.79823	6.99735	37.0643	0.000289307	0.00433894
ENSG00000160256.12	FAM207A	0.759413	5.86393	37.0597	0.000289427	0.00433894
ENSG00000104064.17	GABPB1	0.888735	4.89689	37.0436	0.00028985	0.00433894
ENSG00000234851.4	RPL23AP42	-0.64666	8.28824	37.0384	0.00028999	0.00433894
ENSG00000130305.16	NSUN5	0.753342	6.24041	37.0191	0.000290497	0.00434212
ENSG00000112079.8	STK38	-0.828249	5.01747	37.0028	0.000290928	0.00434266
ENSG00000198663.16	C6orf89	-0.851887	5.99517	36.9955	0.000291123	0.00434266
ENSG00000123353.9	ORMDL2	-0.814084	5.17904	36.924	0.000293025	0.00435731
ENSG00000162545.5	CAMK2N1	-1.87541	1.93914	36.9151	0.000293262	0.00435731
ENSG00000139725.7	RHOF	0.662542	7.2519	36.8994	0.000293684	0.00435731
ENSG00000173674.10	EIF1AX	0.649052	7.61288	36.8953	0.000293792	0.00435731
ENSG00000124688.13	MAD2L1BP	0.774548	5.56774	36.8841	0.000294094	0.00435731
ENSG00000140836.16	ZFHX3	-1.66416	5.22114	46.7328	0.00029414	0.00435731
ENSG00000102359.6	SRPX2	-1.63251	2.2891	36.8798	0.000294208	0.00435731
ENSG00000081019.13	RSBN1	0.838924	4.89499	36.87	0.000294473	0.00435731
ENSG00000169612.3	RAMAC	0.842322	4.86331	36.849	0.000295036	0.00436126
ENSG00000214553.10	LRRC37A11P	-3.37068	-0.46637	36.7984	0.000296405	0.00437642
ENSG00000189159.15	JPT1	0.677356	8.22322	36.7891	0.000296656	0.00437642
ENSG00000119953.12	SMNDC1	0.871204	5.52892	36.7712	0.000297144	0.00437923
ENSG00000172830.12	SSH3	-0.914754	4.47264	36.7467	0.000297809	0.00438464
ENSG00000131089.15	ARHGEF9	-1.03633	3.83406	36.7225	0.00029847	0.00438998
ENSG00000178307.9	TMEM11	0.746424	6.07345	36.6549	0.000300325	0.00441031
ENSG00000184743.12	ATL3	0.801181	5.94619	36.6419	0.000300685	0.00441031
ENSG00000042429.11	MED17	0.800481	5.89289	36.6395	0.000300751	0.00441031
ENSG00000172009.14	THOP1	0.649169	7.58281	36.565	0.000302813	0.00443487
ENSG00000285565.1	AL671762.1	1.7081	1.90513	36.5574	0.000303028	0.00443487
ENSG00000118257.16	NRP2	-0.884644	4.69959	36.5339	0.000303681	0.00444001
ENSG00000123545.5	NDUFAF4	1.0372	3.80473	36.4877	0.000304976	0.0044413
ENSG00000147874.10	HAUS6	-0.823474	5.45337	36.4874	0.000304983	0.0044413
ENSG00000107796.13	ACTA2	-1.30727	2.70441	36.4842	0.000305073	0.0044413
ENSG00000136859.9	ANGPTL2	-2.70839	0.195508	36.4576	0.000305824	0.0044413
ENSG00000143545.8	RAB13	-0.71447	6.57708	36.4565	0.000305855	0.0044413
ENSG00000141750.6	STAC2	-2.96614	0.120029	36.4506	0.00030602	0.0044413
ENSG00000185721.12	DRG1	0.645629	7.63886	36.448	0.000306093	0.0044413
ENSG00000010319.6	SEMA3G	-1.16551	3.18538	36.4448	0.000306182	0.0044413
ENSG00000138061.11	CYP1B1	-0.877787	4.79076	36.3997	0.000307459	0.00445543
ENSG00000152818.18	UTRN	-1.76792	3.8601	39.5656	0.000308593	0.00446747
ENSG00000185049.14	NELFA	0.755796	5.82284	36.336	0.000309273	0.00447154
ENSG00000177738.3	AC025171.1	-1.1784	3.11875	36.3287	0.000309482	0.00447154
ENSG00000126249.7	PDCD2L	0.915592	4.80961	36.3171	0.000309815	0.00447197
ENSG00000111906.17	HDDC2	0.818178	5.51367	36.2289	0.000312353	0.00450419
ENSG00000163479.13	SSR2	-0.637602	7.87003	36.2055	0.000313031	0.00450954
ENSG00000166548.15	TK2	0.767515	5.5973	36.177	0.000313861	0.00451423
ENSG00000136950.13	ARPC5L	0.728047	6.29947	36.1717	0.000314013	0.00451423
ENSG00000137996.12	RTCA	0.722714	6.65869	36.1627	0.000314276	0.00451423
ENSG00000107140.15	TESK1	0.801684	5.20359	36.128	0.000315291	0.0045244
ENSG00000161813.21	LARP4	0.68298	6.70302	36.1174	0.000315601	0.00452443
ENSG00000179627.9	ZBTB42	-1.60121	2.19433	36.0771	0.000316785	0.00453487
ENSG00000102024.17	PLS3	-0.646412	7.68093	36.0717	0.000316945	0.00453487
ENSG00000175826.11	CTDNEP1	0.652095	7.82386	36.0151	0.000318617	0.00455104
ENSG00000163513.17	TGFBR2	-1.29792	5.2285	38.7876	0.000318694	0.00455104
ENSG00000177096.8	PHETA2	-1.09403	3.47198	36.0008	0.000319041	0.00455159
ENSG00000156599.10	ZDHHC5	-0.791084	7.01262	35.9607	0.000320235	0.0045642
ENSG00000177519.3	RPRM	-1.16705	3.67053	35.9402	0.000320847	0.0045685
ENSG00000272068.1	AL365181.2	-1.51972	2.11447	35.909	0.000321785	0.00457292
ENSG00000008952.16	SEC62	0.800792	5.34395	35.9071	0.000321842	0.00457292
ENSG00000124614.15	RPS10	-0.626979	9.92228	35.8988	0.000322089	0.00457292
ENSG00000141076.17	UTP4	0.640501	7.66892	35.7688	0.000326028	0.00462014
ENSG00000188549.12	CCDC9B	-1.14157	3.2557	35.7646	0.000326158	0.00462014
ENSG00000119638.12	NEK9	-0.748271	5.82191	35.7501	0.000326599	0.00462014
ENSG00000162511.7	LAPTM5	-2.69929	0.237347	35.7478	0.00032667	0.00462014
ENSG00000165475.14	CRYL1	-1.43705	2.77902	35.7037	0.000328024	0.00463424
ENSG00000102316.16	MAGED2	-0.701111	6.6172	35.685	0.000328599	0.00463424
ENSG00000180667.10	YOD1	0.78148	5.48276	35.6846	0.000328612	0.00463424
ENSG00000196505.10	GDAP2	0.893561	4.60549	35.6536	0.000329568	0.00463463
ENSG00000008394.12	MGST1	-0.725285	6.61386	35.653	0.000329587	0.00463463
ENSG00000001630.16	CYP51A1	0.66809	6.83781	35.6468	0.000329779	0.00463463
ENSG00000006611.15	USH1C	-2.04684	2.5305	35.6336	0.00033019	0.00463463
ENSG00000163608.14	NEPRO	-0.833988	4.88567	35.6202	0.000330603	0.00463463
ENSG00000134748.12	PRPF38A	0.696596	6.64844	35.6128	0.000330836	0.00463463
ENSG00000197989.14	SNHG12	-0.831075	4.8707	35.6125	0.000330842	0.00463463
ENSG00000159069.13	FBXW5	0.645118	7.3371	35.5901	0.000331542	0.00464001
ENSG00000072195.14	SPEG	-0.81431	4.94627	35.5336	0.000333309	0.00466032
ENSG00000165300.7	SLITRK5	-1.23386	3.00415	35.4866	0.000334786	0.00467652
ENSG00000130479.10	MAP1S	-0.791005	5.20504	35.4148	0.000337064	0.00470388
ENSG00000137936.17	BCAR3	0.820369	7.48087	35.3964	0.000337649	0.00470758
ENSG00000085563.14	ABCB1	-1.02546	3.77148	35.2939	0.000340937	0.00474892
ENSG00000008086.11	CDKL5	-1.12684	3.33142	35.2759	0.00034152	0.00475256
ENSG00000198198.16	SZT2	-0.910602	4.97929	35.2558	0.000342172	0.00475713
ENSG00000163348.3	PYGO2	-0.777666	5.35526	35.1796	0.000344653	0.0047871
ENSG00000198612.10	COPS8	0.744464	5.75546	35.1627	0.000345207	0.00479027
ENSG00000182809.10	CRIP2	-1.63021	2.42916	35.0871	0.000347696	0.00481441
ENSG00000163946.13	FAM208A	-0.820191	5.32108	35.079	0.000347963	0.00481441
ENSG00000228716.6	DHFR	-0.697117	6.55134	35.0658	0.0003484	0.00481441
ENSG00000169914.5	OTUD3	1.30917	3.71806	35.0619	0.000348532	0.00481441
ENSG00000185621.11	LMLN	-1.26656	3.26041	35.06	0.000348595	0.00481441
ENSG00000168061.14	SAC3D1	0.927702	4.73491	35.0505	0.000348908	0.00481441
ENSG00000160584.15	SIK3	-0.862124	5.08295	34.9993	0.000350617	0.00483346
ENSG00000003137.8	CYP26B1	0.836775	5.1428	34.9807	0.000351239	0.00483567
ENSG00000196182.10	STK40	1.02398	6.14475	34.9749	0.000351434	0.00483567
ENSG00000281398.4	SNHG4	-0.761943	5.56212	34.9552	0.000352093	0.00484021
ENSG00000105364.13	MRPL4	0.638211	7.49075	34.9325	0.000352858	0.0048462
ENSG00000116791.13	CRYZ	0.848309	5.8475	34.8928	0.0003542	0.00486009
ENSG00000187266.13	EPOR	-1.07155	3.83434	34.8365	0.000356113	0.00487722
ENSG00000076706.16	MCAM	-0.902976	7.51285	34.8294	0.000356353	0.00487722
ENSG00000131389.17	SLC6A6	-0.712344	6.25429	34.8205	0.000356656	0.00487722
ENSG00000165029.15	ABCA1	-1.8868	1.25545	34.8171	0.000356773	0.00487722
ENSG00000101773.18	RBBP8	0.820458	5.03583	34.8074	0.000357104	0.00487722
ENSG00000139197.10	PEX5	0.654586	6.97081	34.7961	0.000357493	0.004878
ENSG00000125648.14	SLC25A23	-0.829991	6.43824	34.7547	0.000358914	0.00488742
ENSG00000197885.10	NKIRAS1	0.909611	4.35447	34.753	0.000358974	0.00488742
ENSG00000205323.8	SARNP	0.837271	6.06933	34.747	0.000359179	0.00488742
ENSG00000285184.2	AC244033.2	-2.61874	0.667796	34.733	0.000359662	0.00488948
ENSG00000182463.15	TSHZ2	-1.48754	2.80892	34.7205	0.000360094	0.00489083
ENSG00000100722.19	ZC3H14	0.757884	5.76507	34.6865	0.00036127	0.00490229
ENSG00000132383.11	RPA1	0.650377	8.12764	34.6628	0.000362094	0.00490895
ENSG00000186260.16	MRTFB	-1.39268	4.17778	34.632	0.000363168	0.00491897
ENSG00000186468.12	RPS23	-0.677587	9.42926	34.5648	0.000365527	0.00494227
ENSG00000168333.13	PPDPFL	-2.22315	1.52563	34.5639	0.000365559	0.00494227
ENSG00000108773.10	KAT2A	0.757404	7.2274	34.5522	0.00036597	0.00494329
ENSG00000116521.10	SCAMP3	0.657194	6.8144	34.5103	0.000367452	0.00495875
ENSG00000198753.11	PLXNB3	-1.8096	1.72384	34.4907	0.000368148	0.00495974
ENSG00000230124.7	ACBD6	0.915864	6.23493	34.4805	0.00036851	0.00495974
ENSG00000113732.8	ATP6V0E1	0.681035	7.05467	34.4781	0.000368595	0.00495974
ENSG00000108055.9	SMC3	0.723885	6.04022	34.4575	0.000369328	0.00495974
ENSG00000275023.4	MLLT6	-0.729678	7.28911	34.4511	0.000369556	0.00495974
ENSG00000160710.16	ADAR	-0.838269	8.55422	34.4456	0.000369753	0.00495974
ENSG00000189308.10	LIN54	-0.976083	4.16294	34.442	0.000369883	0.00495974
ENSG00000203705.10	TATDN3	0.946364	4.37474	34.4106	0.000371007	0.00497028
ENSG00000049541.10	RFC2	0.720268	6.67578	34.3863	0.000371881	0.00497517
ENSG00000188554.13	NBR1	-0.685676	7.01727	34.3817	0.000372048	0.00497517
ENSG00000111371.15	SLC38A1	-0.648752	7.88727	34.3631	0.000372718	0.0049796
ENSG00000246705.4	H2AFJ	-0.929698	4.2431	34.3341	0.000373765	0.00498907
ENSG00000106086.19	PLEKHA8	0.810979	4.91738	34.3033	0.000374882	0.00499842
ENSG00000196455.7	PIK3R4	-0.84047	5.20541	34.2876	0.000375455	0.00499842
ENSG00000180921.6	FAM83H	-0.709572	7.97408	34.2868	0.000375484	0.00499842
ENSG00000106443.16	PHF14	0.792267	5.00956	34.2592	0.000376489	0.00500726
ENSG00000174021.10	GNG5	0.635407	7.82755	34.2325	0.000377469	0.00500777
ENSG00000148180.19	GSN	-0.985921	4.29722	34.2299	0.000377564	0.00500777
ENSG00000169855.19	ROBO1	-0.979802	5.53356	34.2294	0.000377581	0.00500777
ENSG00000186603.5	HPDL	-0.889906	5.99375	34.204	0.000378513	0.00500777
ENSG00000168818.9	STX18	0.801236	4.94638	34.2019	0.00037859	0.00500777
ENSG00000128283.6	CDC42EP1	-0.691791	6.71024	34.1975	0.000378754	0.00500777
ENSG00000168275.14	COA6	0.825311	5.5626	34.1933	0.000378907	0.00500777
ENSG00000084072.16	PPIE	0.758089	6.22854	34.1832	0.00037928	0.00500819
ENSG00000167508.11	MVD	0.732557	6.30886	34.1237	0.000381482	0.00503276
ENSG00000178202.12	KDELC2	-0.918172	4.45613	34.1089	0.000382034	0.00503553
ENSG00000153406.13	NMRAL1	-0.699699	6.29707	34.0942	0.000382579	0.0050382
ENSG00000100124.14	ANKRD54	0.773558	5.69691	34.067	0.000383596	0.00504708
ENSG00000092929.11	UNC13D	-0.784353	5.9575	34.0542	0.000384074	0.00504885
ENSG00000175274.18	TP53I11	-1.8216	1.57382	34.0424	0.000384518	0.00505018
ENSG00000125746.16	EML2	-0.918586	5.76999	34.0083	0.000385801	0.00505446
ENSG00000198843.12	SELENOT	0.695424	6.36462	34.0057	0.000385899	0.00505446
ENSG00000101158.13	NELFCD	0.653874	7.52092	34.0026	0.000386014	0.00505446
ENSG00000182459.4	TEX19	-2.94729	0.375613	33.978	0.000386945	0.00505446
ENSG00000069345.11	DNAJA2	0.643054	7.03576	33.9763	0.000387006	0.00505446
ENSG00000204370.10	SDHD	0.752748	6.18151	33.9636	0.000387488	0.00505446
ENSG00000184319.15	RPL23AP82	0.91393	4.27495	33.9554	0.000387798	0.00505446
ENSG00000159217.9	IGF2BP1	0.728544	7.75803	33.9476	0.000388095	0.00505446
ENSG00000142178.8	SIK1	0.623775	7.55445	33.9451	0.000388191	0.00505446
ENSG00000257949.6	TEN1	0.871352	4.75275	33.9428	0.000388276	0.00505446
ENSG00000141698.16	NT5C3B	0.720757	6.83476	33.9232	0.000389024	0.00505971
ENSG00000182179.12	UBA7	-1.72383	1.60369	33.9084	0.000389588	0.00506257
ENSG00000187838.16	PLSCR3	-0.883738	4.5685	33.8964	0.000390044	0.00506404
ENSG00000272391.5	POM121C	-0.736839	6.2832	33.8811	0.000390631	0.00506504
ENSG00000141385.9	AFG3L2	0.680914	7.54602	33.8744	0.000390887	0.00506504
ENSG00000137409.19	MTCH1	0.674105	8.19641	33.8674	0.000391154	0.00506504
ENSG00000065618.19	COL17A1	-2.78088	0.318601	33.7963	0.000393893	0.00509604
ENSG00000148803.11	FUOM	-1.11458	3.21359	33.7867	0.000394263	0.00509634
ENSG00000179348.11	GATA2	-0.691869	6.37433	33.7761	0.000394674	0.00509718
ENSG00000111639.7	MRPL51	0.656974	6.87058	33.7368	0.000396202	0.00511002
ENSG00000105723.11	GSK3A	0.711195	6.12244	33.7302	0.000396459	0.00511002
ENSG00000137393.9	RNF144B	-1.22901	2.95012	33.7182	0.000396927	0.00511002
ENSG00000139726.10	DENR	0.702019	6.18725	33.7148	0.000397057	0.00511002
ENSG00000136731.12	UGGT1	-1.01296	7.08564	36.0883	0.000398033	0.0051125
ENSG00000148671.13	ADIRF	-2.44282	0.340141	33.681	0.000398382	0.0051125
ENSG00000112335.14	SNX3	0.629032	7.47781	33.6786	0.000398476	0.0051125
ENSG00000139832.4	RAB20	-0.932648	5.20114	33.6745	0.000398638	0.0051125
ENSG00000171606.17	ZNF274	0.893495	4.46566	33.6521	0.000399516	0.0051193
ENSG00000117298.15	ECE1	-0.728265	7.13012	33.6245	0.000400606	0.0051285
ENSG00000104976.11	SNAPC2	0.953086	4.04925	33.6163	0.000400931	0.0051285
ENSG00000148019.13	CEP78	0.771285	5.3905	33.5994	0.0004016	0.0051326
ENSG00000005436.13	GCFC2	0.868372	4.79901	33.5705	0.000402745	0.00514277
ENSG00000162076.12	FLYWCH2	-0.820766	6.09886	33.5177	0.000404851	0.00516518
ENSG00000072422.16	RHOBTB1	-1.08459	3.86537	33.4384	0.000408041	0.00520137
ENSG00000149136.8	SSRP1	0.652045	9.34652	33.4087	0.000409242	0.00521218
ENSG00000101343.14	CRNKL1	0.860278	4.56833	33.3371	0.00041216	0.00523748
ENSG00000104886.11	PLEKHJ1	0.779113	6.08822	33.3334	0.000412312	0.00523748
ENSG00000151135.9	TMEM263	-0.736285	5.80145	33.3212	0.000412812	0.00523748
ENSG00000142330.19	CAPN10	0.885389	4.77511	33.3068	0.000413402	0.00523748
ENSG00000285793.1	AC125232.2	0.952037	4.24715	33.3053	0.000413461	0.00523748
ENSG00000143793.12	C1orf35	0.740344	5.55334	33.3038	0.000413526	0.00523748
ENSG00000144029.11	MRPS5	0.750293	7.05534	33.2991	0.00041372	0.00523748
ENSG00000170522.9	ELOVL6	-0.890223	4.49855	33.2835	0.000414361	0.00524109
ENSG00000189164.14	ZNF527	1.37983	2.28235	33.2272	0.000416688	0.00526166
ENSG00000139645.9	ANKRD52	-0.908525	8.21499	33.6709	0.000416916	0.00526166
ENSG00000004864.13	SLC25A13	0.669688	6.86983	33.2182	0.000417059	0.00526166
ENSG00000135870.11	RC3H1	0.884006	4.71219	33.1738	0.000418912	0.0052758
ENSG00000133812.15	SBF2	-0.887022	4.62179	33.1715	0.000419004	0.0052758
ENSG00000144043.11	TEX261	0.688189	7.22933	33.1656	0.000419254	0.0052758
ENSG00000248323.6	LUCAT1	-1.45612	2.08346	33.1323	0.000420647	0.00528155
ENSG00000169221.13	TBC1D10B	0.701198	6.12685	33.1296	0.00042076	0.00528155
ENSG00000106344.8	RBM28	0.673069	6.54107	33.1114	0.000421527	0.00528155
ENSG00000120438.11	TCP1	0.608784	8.38095	33.1085	0.000421647	0.00528155
ENSG00000186063.12	AIDA	-0.736981	5.50512	33.1071	0.000421706	0.00528155
ENSG00000067955.13	CBFB	0.846526	5.50856	33.0933	0.000422288	0.00528155
ENSG00000171492.14	LRRC8D	-0.712461	6.17304	33.0895	0.000422448	0.00528155
ENSG00000130640.13	TUBGCP2	0.72624	5.94137	33.0828	0.000422733	0.00528155
ENSG00000137501.17	SYTL2	-2.20412	0.812545	33.0738	0.000423112	0.00528155
ENSG00000111786.8	SRSF9	0.673658	7.76345	33.0694	0.000423299	0.00528155
ENSG00000185596.16	WASH3P	0.880993	4.46991	33.051	0.000424079	0.0052868
ENSG00000108010.11	GLRX3	0.718719	6.55971	33.0144	0.000425634	0.00530116
ENSG00000188986.6	NELFB	0.644401	6.94914	33.007	0.00042595	0.00530116
ENSG00000094880.10	CDC23	0.695881	6.16199	32.9445	0.000428624	0.00532993
ENSG00000198517.9	MAFK	0.699635	6.80748	32.8875	0.000431084	0.005356
ENSG00000171227.6	TMEM37	-1.19152	3.26503	32.8598	0.000432283	0.00536636
ENSG00000039523.19	RIPOR1	-0.702554	6.9816	32.8475	0.000432816	0.00536846
ENSG00000104369.4	JPH1	-1.0459	3.53988	32.8309	0.00043354	0.0053729
ENSG00000095787.21	WAC	-0.699185	6.38253	32.8039	0.000434718	0.00538297
ENSG00000257122.5	RRN3P3	1.37767	2.23882	32.7212	0.000438354	0.00542344
ENSG00000185917.13	SETD4	0.898544	4.24376	32.6966	0.000439444	0.00543236
ENSG00000258315.5	C17orf49	0.951605	4.77705	32.6844	0.000439985	0.00543448
ENSG00000197170.9	PSMD12	0.65227	6.66178	32.6417	0.000441889	0.00545342
ENSG00000086015.20	MAST2	-0.67309	6.42854	32.6189	0.000442907	0.00546141
ENSG00000139880.19	CDH24	-1.03893	3.49557	32.6004	0.000443737	0.00546706
ENSG00000100767.16	PAPLN	-1.01935	3.63674	32.5804	0.000444635	0.00547354
ENSG00000085415.15	SEH1L	0.72723	5.47523	32.5485	0.000446074	0.00548429
ENSG00000175054.14	ATR	-0.94713	4.80317	32.5445	0.000446253	0.00548429
ENSG00000167904.14	TMEM68	0.944414	4.07215	32.5164	0.000447528	0.00548793
ENSG00000077150.18	NFKB2	0.604907	8.09123	32.5027	0.000448149	0.00548793
ENSG00000152332.15	UHMK1	0.706266	7.18256	32.5018	0.000448187	0.00548793
ENSG00000114416.17	FXR1	0.637186	7.18412	32.4947	0.000448512	0.00548793
ENSG00000175193.13	PARL	0.71832	5.91346	32.4908	0.00044869	0.00548793
ENSG00000164081.12	TEX264	0.724106	5.82019	32.4887	0.000448785	0.00548793
ENSG00000106133.17	NSUN5P2	1.11863	3.77676	32.4357	0.000451207	0.00551236
ENSG00000116729.13	WLS	-0.653837	6.86913	32.4286	0.000451532	0.00551236
ENSG00000173020.10	GRK2	0.684828	6.36277	32.4014	0.000452779	0.00552301
ENSG00000081791.8	DELE1	-0.719009	5.71645	32.3927	0.000453182	0.00552335
ENSG00000163050.16	COQ8A	0.660221	6.90961	32.3606	0.000454661	0.00553679
ENSG00000101311.15	FERMT1	-0.826866	4.81352	32.3296	0.000456099	0.00554393
ENSG00000187051.8	RPS19BP1	0.640433	6.75679	32.3242	0.000456352	0.00554393
ENSG00000075651.15	PLD1	-1.24208	3.82988	32.3236	0.000456377	0.00554393
ENSG00000272617.3	AC026464.6	4.69419	1.2241	40.9822	0.000458269	0.00556232
ENSG00000145907.14	G3BP1	-0.712305	7.60494	32.2397	0.000460301	0.00557556
ENSG00000177352.9	CCDC71	-0.882021	4.84014	32.232	0.00046066	0.00557556
ENSG00000054690.13	PLEKHH1	-1.08624	3.48751	32.2266	0.000460914	0.00557556
ENSG00000105778.18	AVL9	0.709628	5.86457	32.2231	0.000461081	0.00557556
ENSG00000255874.2	LINC00346	-1.83868	1.56634	32.2128	0.000461567	0.00557556
ENSG00000282416.1	AC092299.1	1.67053	1.85638	32.2114	0.000461632	0.00557556
ENSG00000149927.17	DOC2A	-1.2033	2.9418	32.2004	0.000462152	0.00557727
ENSG00000136010.13	ALDH1L2	-1.08497	3.79672	32.1607	0.000464029	0.00559058
ENSG00000142230.11	SAE1	0.613527	7.70573	32.16	0.000464061	0.00559058
ENSG00000184828.9	ZBTB7C	-0.769939	5.76029	32.1452	0.000464767	0.00559058
ENSG00000198689.11	SLC9A6	0.876844	5.22202	32.1408	0.000464976	0.00559058
ENSG00000205423.11	CNEP1R1	1.16558	3.0839	32.1335	0.000465324	0.00559058
ENSG00000142197.12	DOP1B	-1.01662	3.53726	32.1268	0.000465643	0.00559058
ENSG00000020181.17	ADGRA2	-1.39058	2.74737	32.1138	0.000466263	0.00559058
ENSG00000180581.7	SRP9P1	-7.39769	-1.50421	37.6631	0.000466293	0.00559058
ENSG00000168763.15	CNNM3	0.732396	5.4189	32.0738	0.000468176	0.00560859
ENSG00000177868.11	SVBP	1.38804	2.19416	32.06	0.000468839	0.00561197
ENSG00000023330.14	ALAS1	0.706695	7.39161	32.0261	0.000470475	0.00562012
ENSG00000214706.10	IFRD2	-0.681875	7.30924	32.0241	0.00047057	0.00562012
ENSG00000169372.12	CRADD	1.07018	3.26247	32.0221	0.000470666	0.00562012
ENSG00000162851.7	TFB2M	0.747611	5.166	31.9378	0.000474762	0.00566444
ENSG00000072071.16	ADGRL1	-0.630934	6.82047	31.9059	0.000476321	0.00567578
ENSG00000198740.8	ZNF652	0.949148	4.17864	31.9026	0.000476483	0.00567578
ENSG00000099991.17	CABIN1	-0.698681	6.66525	31.8936	0.000476923	0.00567643
ENSG00000100345.21	MYH9	-0.723643	9.65137	31.8833	0.000477432	0.0056779
ENSG00000100150.17	DEPDC5	0.82446	4.81361	31.8301	0.000480059	0.00569597
ENSG00000180879.13	SSR4	-0.628467	6.85793	31.8239	0.000480364	0.00569597
ENSG00000163686.14	ABHD6	-0.928297	4.18887	31.8209	0.000480515	0.00569597
ENSG00000136999.4	NOV	-3.27975	-0.533241	31.816	0.000480755	0.00569597
ENSG00000099994.10	SUSD2	-1.25485	2.55036	31.8134	0.000480887	0.00569597
ENSG00000187522.15	HSPA14	0.714686	5.65069	31.7857	0.000482259	0.0056987
ENSG00000109111.14	SUPT6H	-0.804408	7.75548	31.7846	0.000482317	0.0056987
ENSG00000185736.15	ADARB2	-1.17121	3.09201	31.7797	0.000482561	0.0056987
ENSG00000198420.9	TCAF1	-0.813044	5.11225	31.7678	0.000483152	0.0056987
ENSG00000155660.10	PDIA4	-0.641226	8.22734	31.7642	0.000483334	0.0056987
ENSG00000178035.11	IMPDH2	-0.614477	8.33572	31.7577	0.000483657	0.0056987
ENSG00000162231.13	NXF1	0.838897	6.48259	31.7543	0.000483826	0.0056987
ENSG00000136861.17	CDK5RAP2	-0.848767	5.15116	31.7064	0.000486233	0.00572247
ENSG00000101849.16	TBL1X	-0.834458	6.66957	31.6923	0.000486942	0.00572287
ENSG00000099800.7	TIMM13	0.634748	6.81675	31.6903	0.000487044	0.00572287
ENSG00000182149.20	IST1	0.638446	7.1793	31.6435	0.000489409	0.00574607
ENSG00000143469.18	SYT14	4.17899	-0.66933	31.591	0.000492081	0.00577284
ENSG00000103067.13	ESRP2	-0.709581	6.41386	31.5791	0.000492689	0.00577536
ENSG00000168439.16	STIP1	0.606121	8.88961	31.5692	0.000493195	0.0057767
ENSG00000104825.16	NFKBIB	0.769759	5.0394	31.5485	0.000494258	0.00578455
ENSG00000259623.1	AC125257.1	1.18052	3.30293	31.5362	0.000494888	0.00578732
ENSG00000165156.14	ZHX1	-0.894705	4.26743	31.527	0.000495363	0.00578828
ENSG00000065970.8	FOXJ2	-0.737886	5.22869	31.4912	0.00049721	0.00580279
ENSG00000110063.9	DCPS	0.707893	5.72229	31.4877	0.000497393	0.00580279
ENSG00000115446.11	UNC50	0.767095	4.94002	31.4736	0.000498123	0.00580575
ENSG00000168724.16	DNAJC21	0.668193	6.44209	31.4676	0.000498435	0.00580575
ENSG00000119446.13	RBM18	0.804639	4.68808	31.4557	0.000499051	0.00580832
ENSG00000165238.16	WNK2	-0.783464	4.98707	31.4361	0.00050007	0.00580993
ENSG00000167900.11	TK1	-0.708056	6.46149	31.4284	0.000500473	0.00580993
ENSG00000147883.10	CDKN2B	0.867581	4.60675	31.4264	0.000500579	0.00580993
ENSG00000123933.16	MXD4	-0.798372	6.49596	31.4202	0.000500903	0.00580993
ENSG00000131791.7	PRKAB2	0.733647	5.21267	31.411	0.000501384	0.00580993
ENSG00000174840.8	PDE12	0.766251	5.13793	31.4077	0.000501557	0.00580993
ENSG00000198055.10	GRK6	0.908724	5.95343	31.399	0.000502011	0.00581062
ENSG00000147475.15	ERLIN2	0.803246	5.23643	31.377	0.000503163	0.00581937
ENSG00000077463.14	SIRT6	0.928878	4.52955	31.3599	0.000504061	0.00582518
ENSG00000160007.18	ARHGAP35	-0.774887	5.92822	31.3502	0.000504576	0.00582657
ENSG00000116661.10	FBXO2	-1.33184	2.71918	31.3099	0.000506705	0.00584177
ENSG00000204580.13	DDR1	-0.622738	6.96959	31.3028	0.000507077	0.00584177
ENSG00000141298.18	SSH2	-0.720984	5.33312	31.2955	0.000507465	0.00584177
ENSG00000167526.13	RPL13	-0.596363	10.4701	31.2904	0.000507737	0.00584177
ENSG00000154832.14	CXXC1	-0.731044	5.56801	31.2878	0.000507876	0.00584177
ENSG00000095951.16	HIVEP1	-1.10255	4.20531	31.2409	0.000510373	0.00586414
ENSG00000107863.17	ARHGAP21	-0.819286	6.10395	31.2309	0.000510909	0.00586414
ENSG00000175348.10	TMEM9B	-0.970936	4.48904	31.2289	0.000511017	0.00586414
ENSG00000167196.13	FBXO22	0.684503	6.47852	31.21	0.000512031	0.00587121
ENSG00000125657.4	TNFSF9	-0.651193	6.77601	31.186	0.00051332	0.00587383
ENSG00000106266.10	SNX8	0.685477	6.274	31.1819	0.000513543	0.00587383
ENSG00000107643.16	MAPK8	0.795847	4.72902	31.178	0.00051375	0.00587383
ENSG00000157654.17	PALM2-AKAP2	-1.22024	2.7059	31.1752	0.0005139	0.00587383
ENSG00000178913.7	TAF7	0.743359	6.41782	31.1678	0.0005143	0.00587383
ENSG00000257337.6	AC068888.1	-1.44946	2.02075	31.1428	0.000515652	0.00587383
ENSG00000226210.3	WASH8P	0.840204	4.83143	31.1419	0.000515699	0.00587383
ENSG00000172927.7	MYEOV	1.44244	2.27839	31.1399	0.000515807	0.00587383
ENSG00000138942.15	RNF185	-0.744167	5.34583	31.1391	0.00051585	0.00587383
ENSG00000102572.14	STK24	0.644019	6.80025	31.1137	0.000517231	0.005885
ENSG00000151502.10	VPS26B	0.712387	5.95562	31.0798	0.000519075	0.00590143
ENSG00000137275.13	RIPK1	-0.739517	5.20985	31.0622	0.000520042	0.00590785
ENSG00000139746.15	RBM26	0.67767	6.12948	31.0264	0.000522005	0.00592137
ENSG00000075131.9	TIPIN	0.870538	4.40466	31.0258	0.000522036	0.00592137
ENSG00000225968.7	ELFN1	1.37228	2.16365	31	0.00052346	0.00593076
ENSG00000186166.8	CCDC84	0.982155	3.71624	30.9962	0.00052367	0.00593076
ENSG00000120318.15	ARAP3	-0.837352	4.60444	30.9621	0.000525557	0.00594755
ENSG00000168398.6	BDKRB2	-2.7806	-0.118886	30.9547	0.000525963	0.00594758
ENSG00000072571.19	HMMR	-0.780849	4.88823	30.9094	0.000528484	0.00596841
ENSG00000167595.15	PROSER3	-1.09116	3.1241	30.9071	0.000528615	0.00596841
ENSG00000125454.11	SLC25A19	0.751323	6.20521	30.8792	0.000530178	0.00598147
ENSG00000181852.17	RNF41	-0.696615	5.77237	30.8646	0.000530994	0.00598223
ENSG00000266642.2	AC024267.6	1.09001	3.09534	30.8635	0.000531059	0.00598223
ENSG00000105699.16	LSR	0.87197	4.23844	30.8077	0.000534202	0.00601304
ENSG00000157259.7	GATAD1	0.761423	5.02442	30.7871	0.000535371	0.00601522
ENSG00000116396.14	KCNC4	0.888993	5.44877	30.7838	0.00053556	0.00601522
ENSG00000113851.14	CRBN	0.868048	4.25897	30.7756	0.000536026	0.00601522
ENSG00000185189.17	NRBP2	-1.02275	3.59443	30.7751	0.000536054	0.00601522
ENSG00000103426.12	CORO7-PAM16	7.30059	-1.64233	35.9503	0.000536438	0.00601522
ENSG00000145041.15	DCAF1	-0.865774	5.965	30.7544	0.000537232	0.00601953
ENSG00000124383.8	MPHOSPH10	0.726661	5.21601	30.7436	0.000537848	0.00602006
ENSG00000156411.9	ATP5MPL	0.653138	6.80247	30.7392	0.000538097	0.00602006
ENSG00000228223.3	HCG11	-1.08077	3.41748	30.6965	0.000540544	0.00604284
ENSG00000148719.14	DNAJB12	-0.763276	5.95014	30.6643	0.000542398	0.00605897
ENSG00000250317.8	SMIM20	1.07523	4.03896	30.6519	0.000543112	0.00606235
ENSG00000160094.14	ZNF362	-1.08959	3.87943	30.6446	0.000543535	0.00606248
ENSG00000245532.8	NEAT1	-0.681346	6.0245	30.6112	0.000545474	0.00607949
ENSG00000168214.20	RBPJ	-0.774347	4.85828	30.5847	0.000547016	0.00609207
ENSG00000106290.14	TAF6	-0.767112	6.24939	30.5742	0.000547625	0.00609425
ENSG00000239521.8	CASTOR3	-1.21365	2.64268	30.5641	0.000548213	0.00609618
ENSG00000134871.18	COL4A2	-0.681315	8.65529	30.5502	0.000549031	0.00610067
ENSG00000168397.16	ATG4B	0.71422	5.56909	30.522	0.000550682	0.0061144
ENSG00000242616.3	GNG10	0.934051	4.4454	30.4527	0.000554776	0.00615078
ENSG00000165416.14	SUGT1	0.727292	5.39149	30.4524	0.000554794	0.00615078
ENSG00000184007.20	PTP4A2	0.579778	8.89879	30.3745	0.000559443	0.00619683
ENSG00000132323.8	ILKAP	0.782624	4.83061	30.3687	0.00055979	0.00619683
ENSG00000036054.12	TBC1D23	-0.900575	4.51428	30.3512	0.00056084	0.00620097
ENSG00000100246.12	DNAL4	1.034	3.58242	30.3484	0.000561006	0.00620097
ENSG00000111752.10	PHC1	-0.861847	4.34262	30.3395	0.000561544	0.00620226
ENSG00000143995.19	MEIS1	-1.28005	2.79113	30.3146	0.000563044	0.00621364
ENSG00000107959.15	PITRM1	-0.709826	6.70282	30.2988	0.000564002	0.00621364
ENSG00000136891.13	TEX10	0.810303	5.80304	30.298	0.000564054	0.00621364
ENSG00000120256.10	LRP11	-0.998309	4.15736	30.2892	0.000564585	0.00621364
ENSG00000132854.18	KANK4	-1.90555	1.15626	30.2875	0.000564685	0.00621364
ENSG00000130675.14	MNX1	1.10737	3.30175	30.2734	0.000565544	0.00621643
ENSG00000139163.15	ETNK1	0.736318	5.10259	30.2664	0.000565971	0.00621643
ENSG00000225630.1	MTND2P28	0.616116	6.81449	30.2565	0.000566573	0.00621643
ENSG00000162909.17	CAPN2	-0.68561	7.58228	30.2492	0.000567016	0.00621643
ENSG00000137411.17	VARS2	0.806909	5.5324	30.2458	0.000567222	0.00621643
ENSG00000011677.12	GABRA3	-1.09981	3.04176	30.2418	0.000567471	0.00621643
ENSG00000138303.17	ASCC1	0.69127	5.73579	30.2022	0.000569891	0.00623829
ENSG00000172239.13	PAIP1	0.622363	7.18187	30.1682	0.000571985	0.00625514
ENSG00000267757.4	EML2-AS1	-1.3304	2.93346	30.1634	0.00057228	0.00625514
ENSG00000180992.6	MRPL14	0.656511	6.54452	30.1362	0.00057396	0.00626601
ENSG00000175832.12	ETV4	0.632637	6.59444	30.1335	0.000574126	0.00626601
ENSG00000119335.16	SET	0.609568	9.2059	30.1172	0.000575135	0.00627238
ENSG00000163083.5	INHBB	-1.43766	2.40224	30.0982	0.000576318	0.00628063
ENSG00000187778.13	MCRS1	0.601078	7.21643	30.0642	0.000578439	0.00629198
ENSG00000159055.3	MIS18A	0.9294	4.60976	30.0628	0.000578527	0.00629198
ENSG00000169021.5	UQCRFS1	0.649233	7.55632	30.0609	0.000578642	0.00629198
ENSG00000165424.6	ZCCHC24	-0.797371	4.63015	30.0535	0.00057911	0.00629242
ENSG00000143061.17	IGSF3	-1.16481	6.80025	36.2109	0.000580334	0.00629536
ENSG00000185201.16	IFITM2	-0.841274	5.68221	30.0295	0.000580611	0.00629536
ENSG00000184863.10	RBM33	-0.841331	5.33428	30.0264	0.000580809	0.00629536
ENSG00000171345.13	KRT19	-1.09908	3.26331	30.0199	0.000581216	0.00629536
ENSG00000132475.10	H3F3B	0.576705	8.81198	30.0142	0.000581578	0.00629536
ENSG00000123584.7	MAGEA9	7.30931	-1.63778	34.9861	0.000581946	0.00629536
ENSG00000130177.15	CDC16	0.656125	6.30357	29.9982	0.000582583	0.00629763
ENSG00000148200.16	NR6A1	0.981036	4.60369	29.9877	0.000583249	0.0063002
ENSG00000186501.14	TMEM222	0.794458	4.64069	29.9479	0.000585764	0.00632273
ENSG00000143379.12	SETDB1	0.661829	6.18504	29.9411	0.000586196	0.00632276
ENSG00000183111.11	ARHGEF37	-1.89537	1.03248	29.9114	0.000588089	0.00633853
ENSG00000105290.11	APLP1	-1.32857	3.32736	29.8855	0.000589747	0.00635175
ENSG00000240682.9	ISY1	0.697515	5.45208	29.8482	0.000592143	0.00637289
ENSG00000166228.8	PCBD1	0.773858	6.52397	29.8327	0.000593137	0.00637815
ENSG00000101247.17	NDUFAF5	0.918251	4.00883	29.8225	0.000593798	0.00637815
ENSG00000136280.16	CCM2	0.750324	5.2637	29.8204	0.000593931	0.00637815
ENSG00000179526.16	SHARPIN	-0.729459	5.05991	29.7233	0.000600247	0.00644128
ENSG00000213625.8	LEPROT	-0.709937	5.46928	29.7065	0.000601353	0.00644845
ENSG00000274487.2	AC244154.1	1.02542	3.41004	29.6916	0.000602327	0.0064542
ENSG00000165688.11	PMPCA	0.583734	7.69327	29.6608	0.000604356	0.00646881
ENSG00000158470.5	B4GALT5	0.675334	6.39629	29.6516	0.000604964	0.00646881
ENSG00000011451.19	WIZ	-0.695011	5.56868	29.6481	0.000605197	0.00646881
ENSG00000162227.7	TAF6L	0.797651	4.67379	29.6443	0.000605449	0.00646881
ENSG00000109819.8	PPARGC1A	-1.17743	2.71438	29.6255	0.000606694	0.00647742
ENSG00000138385.15	SSB	0.6619	6.62804	29.6146	0.000607422	0.00648049
ENSG00000115935.17	WIPF1	-1.03942	4.48388	29.6064	0.000607967	0.0064816
ENSG00000125731.12	SH2D3A	-0.934031	3.74718	29.5799	0.000609729	0.00649569
ENSG00000125835.18	SNRPB	0.594607	8.44083	29.5287	0.00061316	0.00652752
ENSG00000198727.2	MT-CYB	0.571124	11.6498	29.5156	0.000614046	0.00652991
ENSG00000065548.17	ZC3H15	0.686352	5.71264	29.5122	0.000614272	0.00652991
ENSG00000092841.18	MYL6	-0.586202	9.17678	29.5028	0.000614905	0.00653193
ENSG00000137992.14	DBT	-0.74588	5.40666	29.4882	0.000615895	0.00653773
ENSG00000167699.13	GLOD4	0.656561	6.20965	29.4797	0.000616467	0.00653908
ENSG00000134371.12	CDC73	0.679195	5.91032	29.4692	0.000617176	0.00654122
ENSG00000244879.7	GABPB1-AS1	-1.1737	2.95209	29.4629	0.000617609	0.00654122
ENSG00000099385.11	BCL7C	0.693617	5.83651	29.4571	0.000618002	0.00654122
ENSG00000164366.3	CCDC127	0.690859	5.99674	29.4424	0.000619	0.00654306
ENSG00000165806.19	CASP7	-0.690292	5.68636	29.4388	0.000619243	0.00654306
ENSG00000106078.18	COBL	-0.685235	5.80104	29.4349	0.000619508	0.00654306
ENSG00000130414.11	NDUFA10	0.633672	6.55635	29.3978	0.000622042	0.00656511
ENSG00000216490.3	IFI30	-0.601684	8.00701	29.3846	0.000622947	0.00656994
ENSG00000164751.14	PEX2	-0.926787	3.78189	29.3723	0.000623792	0.00657416
ENSG00000159792.9	PSKH1	-0.830682	4.96578	29.3419	0.000625886	0.00659095
ENSG00000168395.15	ING5	0.762934	4.95758	29.3362	0.000626282	0.00659095
ENSG00000090273.13	NUDC	0.590681	7.77669	29.3281	0.000626839	0.00659211
ENSG00000123908.11	AGO2	0.776411	7.96169	29.3027	0.000628599	0.0066032
ENSG00000162972.10	MAIP1	0.899577	4.46134	29.2913	0.00062939	0.0066032
ENSG00000277972.1	CISD3	-0.777604	5.58291	29.288	0.000629618	0.0066032
ENSG00000163520.13	FBLN2	-0.571655	8.20777	29.2778	0.000630329	0.0066032
ENSG00000106789.12	CORO2A	-0.899404	4.83712	29.276	0.000630452	0.0066032
ENSG00000126458.3	RRAS	-0.8614	4.23593	29.2741	0.000630585	0.0066032
ENSG00000146963.17	LUC7L2	0.624004	6.72317	29.2663	0.000631128	0.00660419
ENSG00000072778.19	ACADVL	-0.575334	8.38974	29.2314	0.000633565	0.00662498
ENSG00000175662.17	TOM1L2	-0.844298	4.32028	29.2192	0.00063442	0.00662921
ENSG00000132463.13	GRSF1	0.621137	7.27753	29.2071	0.000635274	0.00663318
ENSG00000129245.11	FXR2	0.592628	7.33656	29.201	0.0006357	0.00663318
ENSG00000183741.11	CBX6	-0.598651	6.95	29.1808	0.000637121	0.00663656
ENSG00000168066.20	SF1	0.62228	8.29272	29.1802	0.000637165	0.00663656
ENSG00000137547.8	MRPL15	0.613255	6.70212	29.1734	0.000637646	0.00663656
ENSG00000106244.12	PDAP1	0.581354	7.71864	29.1676	0.000638054	0.00663656
ENSG00000116455.13	WDR77	0.673913	7.64615	29.1639	0.000638319	0.00663656
ENSG00000167549.18	CORO6	-1.17917	3.07938	29.1581	0.000638728	0.00663656
ENSG00000065534.18	MYLK	-1.46275	1.94365	29.1411	0.000639935	0.0066444
ENSG00000234614.1	AL450992.2	-3.60615	-1.13553	29.124	0.000641143	0.00664927
ENSG00000172379.20	ARNT2	-1.05837	6.07641	31.1088	0.000641307	0.00664927
ENSG00000038358.14	EDC4	0.583025	7.33429	29.0653	0.000645339	0.00667807
ENSG00000162889.10	MAPKAPK2	-0.60739	6.80111	29.0649	0.000645362	0.00667807
ENSG00000260075.1	NSFP1	-4.51038	-1.21786	29.0638	0.000645446	0.00667807
ENSG00000101230.5	ISM1	-1.50412	1.78733	29.054	0.000646148	0.00668064
ENSG00000046651.14	OFD1	0.856574	4.1871	29.0394	0.000647199	0.00668228
ENSG00000100065.14	CARD10	-0.668352	6.09711	29.0392	0.000647214	0.00668228
ENSG00000177628.15	GBA	-0.765701	6.51677	28.9941	0.000650467	0.00671116
ENSG00000125967.16	NECAB3	-0.687308	5.44373	28.9477	0.000653838	0.00674121
ENSG00000149091.15	DGKZ	0.619975	6.76407	28.9243	0.00065554	0.00675404
ENSG00000261305.2	AC005586.2	-3.73054	-0.358588	28.8818	0.000658661	0.00678108
ENSG00000113716.12	HMGXB3	-0.68783	6.36257	28.876	0.000659086	0.00678108
ENSG00000115233.11	PSMD14	0.618402	6.59424	28.8473	0.000661203	0.00679811
ENSG00000196972.8	SMIM10L2B	-1.82046	1.83984	28.8233	0.000662979	0.00681162
ENSG00000105185.11	PDCD5	0.635312	7.14572	28.8022	0.000664542	0.00682109
ENSG00000105447.12	GRWD1	0.728321	6.79334	28.7984	0.000664829	0.00682109
ENSG00000011243.17	AKAP8L	0.715946	6.29955	28.7797	0.000666222	0.00683064
ENSG00000173442.12	EHBP1L1	-0.691511	6.30146	28.7435	0.000668931	0.0068468
ENSG00000157224.15	CLDN12	1.01355	3.78247	28.741	0.000669117	0.0068468
ENSG00000022277.12	RTF2	0.64066	6.58876	28.7362	0.000669479	0.0068468
ENSG00000072135.12	PTPN18	-1.03577	4.19106	28.7338	0.000669659	0.0068468
ENSG00000185104.19	FAF1	0.729217	6.88259	28.6993	0.00067225	0.00686852
ENSG00000086589.11	RBM22	0.723396	6.32605	28.6801	0.000673699	0.00687856
ENSG00000130826.17	DKC1	0.590934	7.82525	28.6613	0.000675126	0.00688835
ENSG00000163820.14	FYCO1	-1.0976	5.73725	30.5886	0.000675825	0.00689065
ENSG00000065600.12	TMEM206	0.720619	5.0312	28.6454	0.000676332	0.00689065
ENSG00000197444.9	OGDHL	-1.01606	3.47785	28.6398	0.000676758	0.00689065
ENSG00000215030.5	RPL13P12	-0.616867	6.63481	28.6303	0.000677484	0.00689065
ENSG00000142544.6	CTU1	1.13443	3.02183	28.6276	0.000677692	0.00689065
ENSG00000138071.13	ACTR2	-0.575922	7.51003	28.62	0.000678267	0.00689173
ENSG00000109854.13	HTATIP2	-0.664021	6.01602	28.61	0.000679035	0.00689478
ENSG00000184281.14	TSSC4	0.746328	5.24046	28.5836	0.000681049	0.00690624
ENSG00000183258.11	DDX41	0.59256	6.91657	28.583	0.000681101	0.00690624
ENSG00000123297.17	TSFM	0.631077	6.57519	28.57	0.000682098	0.00691159
ENSG00000137878.17	GCOM1	-2.6694	-0.169196	28.5631	0.000682628	0.00691219
ENSG00000180801.13	ARSJ	-1.11476	2.82058	28.5292	0.000685243	0.0069339
ENSG00000166900.16	STX3	0.814663	4.64919	28.5158	0.000686272	0.00693542
ENSG00000050555.17	LAMC3	-0.661795	6.06662	28.515	0.000686335	0.00693542
ENSG00000275464.4	FP565260.1	0.636697	6.39074	28.488	0.000688434	0.00695187
ENSG00000004399.12	PLXND1	-0.721295	6.72962	28.4519	0.000691244	0.0069722
ENSG00000168884.14	TNIP2	0.685835	5.42581	28.4482	0.000691533	0.0069722
ENSG00000113460.12	BRIX1	0.600376	7.33163	28.4388	0.000692271	0.0069722
ENSG00000148411.7	NACC2	-0.673262	6.15036	28.4379	0.000692342	0.0069722
ENSG00000275793.1	RIMBP3	-2.0286	0.734212	28.4178	0.000693917	0.00698054
ENSG00000112130.16	RNF8	0.698269	5.67085	28.4152	0.000694119	0.00698054
ENSG00000064309.14	CDON	-0.986882	4.28653	28.3682	0.00069782	0.00701297
ENSG00000179241.12	LDLRAD3	-0.776462	4.77476	28.3368	0.000700307	0.00703317
ENSG00000172493.20	AFF1	-0.793436	6.012	28.3131	0.00070219	0.00703877
ENSG00000080189.14	SLC35C2	0.651308	6.08253	28.3119	0.000702291	0.00703877
ENSG00000156017.12	CARNMT1	0.81985	4.44273	28.3118	0.000702299	0.00703877
ENSG00000157350.12	ST3GAL2	-0.741338	5.49595	28.3051	0.00070283	0.0070393
ENSG00000160145.15	KALRN	-1.18755	2.5206	28.2681	0.000705789	0.00706146
ENSG00000182512.4	GLRX5	0.74598	5.77796	28.2644	0.000706089	0.00706146
ENSG00000119328.11	FAM206A	0.753812	4.75849	28.251	0.000707167	0.00706146
ENSG00000143368.9	SF3B4	0.561167	8.04914	28.2495	0.000707285	0.00706146
ENSG00000172432.18	GTPBP2	-0.654743	6.13389	28.2432	0.000707791	0.00706146
ENSG00000164902.13	PHAX	0.688598	5.28464	28.2416	0.000707921	0.00706146
ENSG00000165118.14	C9orf64	0.826519	4.47106	28.2174	0.000709869	0.0070761
ENSG00000182326.14	C1S	-0.676867	5.91182	28.2055	0.00071083	0.00708089
ENSG00000039560.13	RAI14	-0.923622	3.82118	28.1853	0.000712465	0.00709238
ENSG00000123066.8	MED13L	-0.814634	5.55768	28.16	0.000714527	0.00710713
ENSG00000198160.14	MIER1	-0.67475	5.61464	28.1552	0.000714913	0.00710713
ENSG00000130702.15	LAMA5	-0.708535	8.47915	28.1008	0.000719362	0.00714653
ENSG00000056277.15	ZNF280C	-1.30284	2.27405	28.0758	0.000721416	0.00716211
ENSG00000107789.15	MINPP1	0.789885	4.54546	28.0571	0.00072296	0.00717002
ENSG00000183309.11	ZNF623	-0.798563	4.93693	28.0544	0.000723187	0.00717002
ENSG00000166340.16	TPP1	-0.773393	6.6034	28.0401	0.000724369	0.00717691
ENSG00000175294.5	CATSPER1	-2.87272	-0.573574	28.0226	0.000725824	0.00718649
ENSG00000158859.9	ADAMTS4	-1.19005	2.86682	28.0162	0.00072635	0.00718686
ENSG00000146733.13	PSPH	0.720846	5.00965	27.9843	0.00072901	0.00720834
ENSG00000176853.15	FAM91A1	0.692891	5.35809	27.9719	0.000730047	0.00721202
ENSG00000083844.10	ZNF264	0.926859	3.78623	27.9681	0.000730362	0.00721202
ENSG00000090061.17	CCNK	-0.670564	5.55948	27.9438	0.000732403	0.00722733
ENSG00000213064.9	SFT2D2	-0.846854	5.49329	27.9359	0.000733066	0.00722903
ENSG00000196911.10	KPNA5	1.04858	3.20933	27.9174	0.000734619	0.00723949
ENSG00000158158.11	CNNM4	-0.803916	4.4024	27.8947	0.000736539	0.00725069
ENSG00000198836.9	OPA1	0.666971	6.05063	27.8923	0.00073674	0.00725069
ENSG00000173559.12	NABP1	-0.873505	4.53199	27.8857	0.000737302	0.00725137
ENSG00000159335.15	PTMS	-0.566478	7.48378	27.8491	0.000740407	0.00727253
ENSG00000159079.18	CFAP298	0.675242	6.51278	27.8481	0.000740489	0.00727253
ENSG00000111731.12	C2CD5	-0.976665	3.96819	27.8429	0.000740936	0.00727253
ENSG00000263155.5	MYZAP	-3.04413	-0.404683	27.8309	0.000741957	0.0072777
ENSG00000112306.7	RPS12	-0.568112	9.05443	27.8157	0.000743257	0.00728104
ENSG00000185163.9	DDX51	0.676929	5.34246	27.8109	0.00074367	0.00728104
ENSG00000065457.10	ADAT1	-0.96558	3.45571	27.8096	0.000743781	0.00728104
ENSG00000169895.5	SYAP1	0.618203	6.84264	27.7936	0.000745151	0.0072896
ENSG00000125651.13	GTF2F1	0.591035	6.79266	27.775	0.000746745	0.00730035
ENSG00000133997.11	MED6	0.743668	4.769	27.7684	0.000747319	0.00730111
ENSG00000038002.8	AGA	-1.244	2.37357	27.743	0.000749512	0.00731495
ENSG00000124275.14	MTRR	-0.78378	6.36437	27.7404	0.000749729	0.00731495
ENSG00000175455.14	CCDC14	-0.856272	4.37783	27.7297	0.000750661	0.00731919
ENSG00000213337.8	ANKRD39	0.830728	4.33226	27.6982	0.000753393	0.00734068
ENSG00000204070.9	SYS1	0.682691	5.36277	27.6928	0.000753862	0.00734068
ENSG00000164045.11	CDC25A	0.620368	6.95159	27.6669	0.000756119	0.00735779
ENSG00000108557.18	RAI1	-0.659205	6.02603	27.6556	0.000757112	0.00736259
ENSG00000164438.5	TLX3	0.810457	4.34988	27.6312	0.000759252	0.00737853
ENSG00000123992.19	DNPEP	0.669649	5.4826	27.6014	0.000761875	0.00739896
ENSG00000120992.17	LYPLA1	0.647518	6.13024	27.5921	0.000762696	0.00739896
ENSG00000138944.7	SHISAL1	-1.10636	3.94743	27.5892	0.000762948	0.00739896
ENSG00000219481.10	NBPF1	0.750412	5.93813	27.5823	0.00076356	0.00739896
ENSG00000224531.5	SMIM13	0.671414	5.45362	27.5788	0.000763867	0.00739896
ENSG00000159658.10	EFCAB14	-0.632079	6.28981	27.5655	0.000765051	0.00740555
ENSG00000188739.14	RBM34	0.671923	5.58079	27.5548	0.000766001	0.00740988
ENSG00000188191.14	PRKAR1B	0.670589	5.9081	27.5098	0.000770008	0.00744375
ENSG00000008853.16	RHOBTB2	0.618741	6.64183	27.4836	0.000772358	0.00745684
ENSG00000099860.8	GADD45B	-0.931972	4.52716	27.4809	0.000772599	0.00745684
ENSG00000196517.11	SLC6A9	-0.852224	4.85221	27.4728	0.000773319	0.00745684
ENSG00000107263.18	RAPGEF1	0.645569	6.04814	27.4687	0.000773691	0.00745684
ENSG00000127585.11	FBXL16	-1.15962	4.96538	29.2771	0.000773894	0.00745684
ENSG00000162772.16	ATF3	0.745581	5.41055	27.4368	0.000776571	0.00747773
ENSG00000126878.12	AIF1L	-0.934225	4.68914	27.412	0.00077881	0.00749439
ENSG00000144635.8	DYNC1LI1	0.645905	5.96094	27.4057	0.000779381	0.00749499
ENSG00000090975.12	PITPNM2	-0.786737	4.50565	27.3932	0.00078052	0.00750104
ENSG00000271741.1	AC114490.2	-2.65585	-0.220946	27.3787	0.000781841	0.00750264
ENSG00000187607.15	ZNF286A	0.917291	3.8469	27.3779	0.000781916	0.00750264
ENSG00000141013.16	GAS8	0.657713	6.07096	27.3715	0.000782493	0.00750264
ENSG00000040531.14	CTNS	0.713	4.96556	27.3646	0.000783124	0.00750264
ENSG00000261236.7	BOP1	0.551646	8.22283	27.3611	0.000783449	0.00750264
ENSG00000198746.12	GPATCH3	0.822516	4.34367	27.3526	0.000784218	0.00750264
ENSG00000223764.2	LINC02593	-1.79672	0.994131	27.3523	0.000784254	0.00750264
ENSG00000182957.15	SPATA13	-1.04563	3.03038	27.3352	0.000785816	0.00750761
ENSG00000100139.13	MICALL1	-0.679631	5.81916	27.3329	0.000786024	0.00750761
ENSG00000122711.8	SPINK4	-1.48544	1.67367	27.3299	0.000786302	0.00750761
ENSG00000053372.4	MRTO4	0.603892	6.94299	27.3231	0.000786924	0.00750867
ENSG00000081721.11	DUSP12	0.677477	5.41531	27.3121	0.000787933	0.00751343
ENSG00000116584.17	ARHGEF2	-0.592361	6.72921	27.2959	0.000789426	0.00752279
ENSG00000184047.17	DIABLO	0.635238	6.13561	27.2869	0.000790257	0.00752432
ENSG00000186174.12	BCL9L	-0.922989	6.9831	29.0646	0.000791447	0.00752432
ENSG00000206503.12	HLA-A	-0.644154	8.3769	27.2723	0.000791613	0.00752432
ENSG00000108061.11	SHOC2	-0.979207	4.06277	27.2721	0.00079163	0.00752432
ENSG00000160633.12	SAFB	0.59847	7.40007	27.2564	0.000793083	0.00753327
ENSG00000265107.2	GJA5	-2.10365	0.42697	27.2028	0.000798077	0.00757581
ENSG00000147130.14	ZMYM3	-0.646901	6.48713	27.1915	0.000799128	0.00757873
ENSG00000148308.17	GTF3C5	0.598618	6.8005	27.1885	0.000799414	0.00757873
ENSG00000198919.12	DZIP3	-1.15638	2.61823	27.17	0.000801147	0.00758588
ENSG00000023734.10	STRAP	0.549824	8.16233	27.1686	0.000801279	0.00758588
ENSG00000157778.8	PSMG3	0.636681	6.07579	27.164	0.000801714	0.00758588
ENSG00000112578.9	BYSL	0.703344	6.67308	27.1459	0.000803412	0.00759707
ENSG00000156650.13	KAT6B	-1.09217	3.5345	27.1234	0.000805539	0.00761053
ENSG00000070371.15	CLTCL1	-0.687356	5.17095	27.1199	0.00080587	0.00761053
ENSG00000115183.14	TANC1	-0.707426	5.19378	27.0719	0.000810429	0.00764362
ENSG00000104067.16	TJP1	-0.880655	5.03208	27.0687	0.000810737	0.00764362
ENSG00000105287.12	PRKD2	0.671816	5.31113	27.0667	0.000810931	0.00764362
ENSG00000106852.15	LHX6	0.912728	4.04299	27.0606	0.000811509	0.00764417
ENSG00000136848.17	DAB2IP	-0.755171	6.29098	27.0528	0.00081225	0.00764626
ENSG00000103126.14	AXIN1	0.599027	6.67264	27.0289	0.000814543	0.00765984
ENSG00000244165.1	P2RY11	1.13173	2.90173	27.022	0.000815207	0.00765984
ENSG00000083750.12	RRAGB	1.21328	2.61116	27.0215	0.000815253	0.00765984
ENSG00000115525.17	ST3GAL5	1.12346	2.76199	26.9805	0.000819205	0.00769207
ENSG00000198795.10	ZNF521	-1.38621	1.89837	26.9602	0.000821164	0.00770554
ENSG00000117395.12	EBNA1BP2	0.554739	8.28813	26.9514	0.000822018	0.00770688
ENSG00000105355.8	PLIN3	0.58275	7.30814	26.9479	0.000822353	0.00770688
ENSG00000074657.13	ZNF532	-0.842451	4.39705	26.9273	0.000824363	0.00772079
ENSG00000129932.8	DOHH	0.778326	4.47925	26.911	0.00082595	0.00773075
ENSG00000140983.13	RHOT2	0.577799	6.92129	26.8895	0.000828049	0.00774547
ENSG00000139132.14	FGD4	1.17364	3.06691	26.8791	0.00082907	0.0077501
ENSG00000109534.16	GAR1	0.694813	5.08964	26.854	0.000831539	0.00776824
ENSG00000089693.10	MLF2	0.580514	8.56279	26.8321	0.000833689	0.00777506
ENSG00000122884.12	P4HA1	-0.706018	5.88012	26.8314	0.000833761	0.00777506
ENSG00000126261.12	UBA2	0.569762	7.30636	26.8285	0.000834054	0.00777506
ENSG00000244187.7	TMEM141	-0.790567	4.63742	26.8251	0.000834381	0.00777506
ENSG00000243989.8	ACY1	-0.650825	5.82801	26.8143	0.00083545	0.00777664
ENSG00000138078.15	PREPL	-0.676421	5.22579	26.8087	0.000836004	0.00777664
ENSG00000176454.13	LPCAT4	-0.780011	4.74994	26.8031	0.000836565	0.00777664
ENSG00000102710.19	SUPT20H	-0.762145	4.64855	26.8021	0.000836664	0.00777664
ENSG00000137486.16	ARRB1	-0.724671	4.94989	26.784	0.000838456	0.00778839
ENSG00000145555.14	MYO10	-0.689108	7.47733	26.7576	0.000841094	0.0078071
ENSG00000178038.16	ALS2CL	-1.07478	2.84689	26.7532	0.000841532	0.0078071
ENSG00000173933.20	RBM4	0.571517	6.95362	26.7404	0.000842812	0.00781405
ENSG00000249992.1	TMEM158	1.38995	2.26548	26.6947	0.000847399	0.00785164
ENSG00000196205.8	EEF1A1P5	-0.642932	5.94001	26.6454	0.00085239	0.00789292
ENSG00000136247.14	ZDHHC4	0.687677	5.82475	26.6355	0.000853391	0.00789722
ENSG00000166164.15	BRD7	0.614103	6.34625	26.6201	0.000854954	0.00790017
ENSG00000065361.15	ERBB3	-0.729697	4.84126	26.618	0.000855169	0.00790017
ENSG00000187866.8	FAM122A	-0.85157	3.97248	26.6166	0.000855319	0.00790017
ENSG00000137177.19	KIF13A	-0.740051	5.64855	26.6061	0.000856385	0.00790505
ENSG00000142687.17	KIAA0319L	-0.729709	6.24788	26.5713	0.000859954	0.00793302
ENSG00000166454.9	ATMIN	0.63765	5.91436	26.5579	0.000861328	0.00794073
ENSG00000205571.13	SMN2	0.672889	5.97982	26.5431	0.00086285	0.00794977
ENSG00000156261.12	CCT8	0.54307	8.41358	26.5344	0.000863743	0.00795303
ENSG00000203879.11	GDI1	0.584062	6.8251	26.5107	0.000866203	0.00796596
ENSG00000162517.12	PEF1	0.630415	6.04255	26.5104	0.00086623	0.00796596
ENSG00000010322.15	NISCH	0.629651	6.46739	26.5012	0.000867183	0.00796975
ENSG00000107185.9	RGP1	-0.818728	6.35358	26.4955	0.000867774	0.0079702
ENSG00000137871.20	ZNF280D	-1.02476	3.12947	26.4812	0.000869261	0.00797023
ENSG00000112414.14	ADGRG6	-0.929014	5.26526	26.4783	0.000869566	0.00797023
ENSG00000137309.19	HMGA1	-0.599992	9.64579	26.4753	0.000869875	0.00797023
ENSG00000179988.14	PSTK	1.45528	1.88651	26.4658	0.000870865	0.00797023
ENSG00000174804.3	FZD4	-0.998161	3.20661	26.4651	0.000870935	0.00797023
ENSG00000103044.10	HAS3	1.34619	2.21603	26.4498	0.000872538	0.00797023
ENSG00000105939.12	ZC3HAV1	-0.57032	7.07802	26.4447	0.000873067	0.00797023
ENSG00000165724.5	ZMYND19	0.67839	6.09708	26.4424	0.00087331	0.00797023
ENSG00000147251.15	DOCK11	-1.14856	2.88553	26.4419	0.000873365	0.00797023
ENSG00000168056.15	LTBP3	-0.606274	6.4275	26.4373	0.000873842	0.00797023
ENSG00000171148.13	TADA3	0.57602	6.80926	26.432	0.000874398	0.00797023
ENSG00000106591.3	MRPL32	0.654181	6.02597	26.4285	0.00087477	0.00797023
ENSG00000115239.21	ASB3	0.779903	4.42692	26.428	0.000874815	0.00797023
ENSG00000100558.8	PLEK2	-0.859929	3.95313	26.4198	0.000875676	0.00797315
ENSG00000273045.6	C2orf15	2.08151	0.615882	26.4056	0.000877174	0.00797891
ENSG00000160588.9	MPZL3	1.18911	2.40773	26.4035	0.000877393	0.00797891
ENSG00000158552.12	ZFAND2B	1.07747	3.58404	26.3498	0.000883062	0.00802069
ENSG00000166788.9	SAAL1	0.80532	4.3399	26.3497	0.000883077	0.00802069
ENSG00000144354.13	CDCA7	-0.658178	5.36637	26.3311	0.000885053	0.00803369
ENSG00000183530.13	PRR14L	-0.888763	5.31147	26.3013	0.000888229	0.00805754
ENSG00000130962.17	PRRG1	0.797841	4.35216	26.2588	0.000892788	0.00808883
ENSG00000197256.10	KANK2	-0.641858	5.8331	26.2569	0.000892996	0.00808883
ENSG00000248592.7	TMEM110-MUSTN1	1.16706	2.62554	26.248	0.000893955	0.00808883
ENSG00000006530.16	AGK	-0.877226	3.76211	26.2411	0.000894695	0.00808883
ENSG00000183054.11	RGPD6	1.20717	4.17929	26.2391	0.000894915	0.00808883
ENSG00000159399.9	HK2	-0.602403	6.71616	26.2385	0.000894974	0.00808883
ENSG00000087258.14	GNAO1	-0.751574	4.6976	26.2231	0.000896643	0.00809895
ENSG00000060339.13	CCAR1	-0.711884	5.76794	26.218	0.000897195	0.00809896
ENSG00000183506.17	PI4KAP2	0.82559	4.3223	26.2026	0.000898861	0.00810903
ENSG00000131115.15	ZNF227	1.34848	2.10683	26.1655	0.000902895	0.00814043
ENSG00000116017.10	ARID3A	0.661336	5.42749	26.1513	0.000904448	0.00814944
ENSG00000198952.8	SMG5	0.739282	7.97973	26.1442	0.00090522	0.00815141
ENSG00000152056.16	AP1S3	-0.898429	3.78314	26.129	0.000906887	0.00815614
ENSG00000164463.12	CREBRF	1.14406	2.58826	26.1244	0.000907396	0.00815614
ENSG00000180628.14	PCGF5	0.842734	5.44635	26.1213	0.000907731	0.00815614
ENSG00000158715.5	SLC45A3	-0.851294	3.96643	26.1192	0.000907961	0.00815614
ENSG00000122786.19	CALD1	-0.647384	5.61312	26.0997	0.000910111	0.00817047
ENSG00000105849.5	TWISTNB	-0.792552	4.52952	26.0835	0.000911894	0.00818128
ENSG00000186625.13	KATNA1	0.844231	3.9675	26.0787	0.000912427	0.00818128
ENSG00000170485.16	NPAS2	-1.16971	4.83321	27.7271	0.000914941	0.00819678
ENSG00000196547.14	MAN2A2	-0.757635	5.71077	26.0519	0.000915393	0.00819678
ENSG00000134504.13	KCTD1	-0.828112	4.29825	26.048	0.000915825	0.00819678
ENSG00000023041.11	ZDHHC6	0.660053	5.28722	26.0045	0.000920681	0.00822796
ENSG00000171861.10	MRM3	0.654076	5.65107	25.999	0.000921286	0.00822796
ENSG00000150768.15	DLAT	0.571527	6.99128	25.997	0.000921509	0.00822796
ENSG00000179855.6	GIPC3	-0.809972	4.22623	25.9967	0.000921545	0.00822796
ENSG00000100532.11	CGRRF1	1.10084	2.69893	25.9835	0.000923029	0.0082332
ENSG00000102753.9	KPNA3	0.642693	5.85092	25.9815	0.00092325	0.0082332
ENSG00000162599.15	NFIA	-0.725597	5.53206	25.9624	0.000925396	0.00824734
ENSG00000160201.11	U2AF1	0.638948	5.97817	25.9394	0.000927993	0.00826435
ENSG00000049618.23	ARID1B	-0.869945	4.99617	25.9355	0.000928428	0.00826435
ENSG00000133884.9	DPF2	0.615357	6.19071	25.9305	0.000928998	0.00826444
ENSG00000151208.16	DLG5	-0.668976	6.39812	25.8985	0.000932617	0.00829162
ENSG00000263826.1	AC112907.3	-2.42847	1.10658	25.8802	0.000934706	0.00830238
ENSG00000076043.9	REXO2	0.609639	6.28033	25.8756	0.000935226	0.00830238
ENSG00000105248.15	YJU2	-0.934878	3.68675	25.8717	0.000935669	0.00830238
ENSG00000170855.3	TRIAP1	0.641185	5.64847	25.8681	0.000936083	0.00830238
ENSG00000147065.16	MSN	-1.07955	8.99349	31.3979	0.000937659	0.00831135
ENSG00000104524.13	PYCR3	-0.663078	5.21453	25.8367	0.00093968	0.00832425
ENSG00000280670.2	CCDC163	1.21354	2.52873	25.8295	0.000940495	0.0083252
ENSG00000265354.3	TIMM23	0.568043	7.18627	25.8259	0.000940918	0.0083252
ENSG00000124171.8	PARD6B	1.24966	2.16511	25.8118	0.000942533	0.00833368
ENSG00000124208.16	TMEM189-UBE2V1	-1.0661	2.86072	25.8077	0.000943008	0.00833368
ENSG00000247556.6	OIP5-AS1	-0.778064	5.90145	25.7954	0.000944426	0.00833899
ENSG00000133398.3	MED10	0.66076	5.98298	25.7927	0.000944742	0.00833899
ENSG00000143727.15	ACP1	0.587725	7.20317	25.7825	0.000945919	0.00834348
ENSG00000083635.7	NUFIP1	0.898712	3.87972	25.7785	0.000946384	0.00834348
ENSG00000087074.7	PPP1R15A	0.688801	5.22389	25.7611	0.000948397	0.00835623
ENSG00000125753.13	VASP	0.589159	6.52576	25.7196	0.000953226	0.00839375
ENSG00000151923.17	TIAL1	0.62681	6.39561	25.7119	0.000954125	0.00839665
ENSG00000226328.6	NUP50-DT	-1.46443	2.09164	25.7006	0.000955445	0.00840323
ENSG00000173641.17	HSPB7	-1.44495	3.9336	27.9411	0.00095832	0.00842349
ENSG00000118939.17	UCHL3	0.701362	5.05622	25.6666	0.000959435	0.00842729
ENSG00000153721.18	CNKSR3	-0.983171	3.26036	25.6627	0.000959897	0.00842729
ENSG00000169592.14	INO80E	0.653831	5.73818	25.6467	0.000961785	0.00843409
ENSG00000123091.4	RNF11	0.610609	6.20238	25.6462	0.000961845	0.00843409
ENSG00000212719.11	C17orf51	0.694551	5.46601	25.6373	0.000962895	0.00843409
ENSG00000110660.14	SLC35F2	0.636037	5.80749	25.6367	0.000962963	0.00843409
ENSG00000170502.12	NUDT9	-0.768151	4.4734	25.6216	0.000964752	0.00844473
ENSG00000171132.13	PRKCE	0.954763	3.32179	25.6091	0.000966238	0.00845271
ENSG00000159593.14	NAE1	0.612903	6.28049	25.598	0.000967557	0.00845815
ENSG00000079134.11	THOC1	0.735533	4.66943	25.5942	0.000968008	0.00845815
ENSG00000141560.14	FN3KRP	0.724735	5.1097	25.5735	0.000970472	0.00847008
ENSG00000183856.10	IQGAP3	-0.706431	5.74673	25.5685	0.00097107	0.00847008
ENSG00000027001.9	MIPEP	0.691	5.02422	25.5683	0.000971099	0.00847008
ENSG00000163283.6	ALPP	-0.931414	5.74921	25.5494	0.000973359	0.00848476
ENSG00000101161.7	PRPF6	0.55935	7.48914	25.54	0.000974489	0.00848959
ENSG00000169762.16	TAPT1	0.942887	3.40888	25.5316	0.000975492	0.0084933
ENSG00000140157.14	NIPA2	0.608204	6.24247	25.5265	0.000976102	0.00849358
ENSG00000100764.13	PSMC1	0.560276	7.04478	25.5203	0.000976851	0.00849508
ENSG00000139428.11	MMAB	-0.660467	5.21516	25.5152	0.000977464	0.0084954
ENSG00000168259.14	DNAJC7	0.551025	7.18681	25.5075	0.000978392	0.00849845
ENSG00000145220.13	LYAR	0.683223	5.01162	25.5024	0.000979005	0.00849875
ENSG00000189079.15	ARID2	-0.922459	4.59838	25.4937	0.000980057	0.00850136
ENSG00000137872.16	SEMA6D	-1.63246	1.69701	25.4904	0.00098046	0.00850136
ENSG00000130772.13	MED18	0.826456	4.53883	25.4797	0.000981759	0.00850761
ENSG00000113441.15	LNPEP	-0.964632	5.40791	25.6656	0.000982843	0.008512
ENSG00000183666.16	GUSBP1	0.971296	3.19708	25.3615	0.000996209	0.00861218
ENSG00000187720.14	THSD4	-1.73377	3.39869	29.5475	0.000996438	0.00861218
ENSG00000164048.13	ZNF589	-0.741354	4.65522	25.3565	0.00099682	0.00861218
ENSG00000099341.11	PSMD8	0.55164	7.43324	25.3495	0.000997684	0.00861218
ENSG00000115109.13	EPB41L5	0.814502	4.26035	25.3477	0.000997915	0.00861218
ENSG00000100234.11	TIMP3	-0.773173	6.71528	25.3476	0.00099792	0.00861218
ENSG00000164620.8	RELL2	-1.14467	2.65429	25.3284	0.0010003	0.00862313
ENSG00000117593.10	DARS2	-0.619694	5.96526	25.3279	0.00100036	0.00862313
ENSG00000110013.12	SIAE	-0.80059	4.16974	25.3025	0.00100351	0.00863641
ENSG00000118454.12	ANKRD13C	0.633448	5.7266	25.3022	0.00100355	0.00863641
ENSG00000101546.12	RBFA	0.80807	5.04694	25.2962	0.0010043	0.00863641
ENSG00000204392.10	LSM2	0.675569	6.06531	25.2936	0.00100463	0.00863641
ENSG00000163636.10	PSMD6	0.611372	6.13024	25.2919	0.00100483	0.00863641
ENSG00000116954.7	RRAGC	0.674545	5.16228	25.2816	0.00100612	0.0086371
ENSG00000186951.16	PPARA	-0.84831	3.91735	25.281	0.0010062	0.0086371
ENSG00000106538.9	RARRES2	-3.50345	-0.96742	25.2739	0.00100708	0.0086371
ENSG00000076924.11	XAB2	0.575264	7.07085	25.2725	0.00100726	0.0086371
ENSG00000088356.5	PDRG1	0.65988	5.50651	25.2486	0.00101025	0.00865088
ENSG00000270800.3	RPS10-NUDT3	0.727584	5.05526	25.2485	0.00101027	0.00865088
ENSG00000261040.7	WFDC21P	-1.42606	1.71898	25.2456	0.00101063	0.00865088
ENSG00000118898.15	PPL	-0.972818	3.74147	25.2354	0.00101192	0.00865332
ENSG00000133265.10	HSPBP1	0.620789	5.97148	25.234	0.00101209	0.00865332
ENSG00000105928.14	GSDME	-0.697259	5.78581	25.2274	0.00101292	0.00865537
ENSG00000066735.14	KIF26A	-0.708212	4.82753	25.2127	0.00101478	0.00866621
ENSG00000175084.11	DES	-1.33818	2.22222	25.1932	0.00101724	0.00868223
ENSG00000196878.14	LAMB3	-0.761247	5.23863	25.1713	0.00102001	0.00869193
ENSG00000115657.13	ABCB6	-0.691701	5.20166	25.1675	0.0010205	0.00869193
ENSG00000136279.20	DBNL	-0.617594	6.02311	25.1636	0.001021	0.00869193
ENSG00000162496.8	DHRS3	-0.748078	4.60691	25.1617	0.00102124	0.00869193
ENSG00000110025.12	SNX15	0.771027	4.34314	25.1596	0.00102151	0.00869193
ENSG00000172301.10	COPRS	0.612716	6.12927	25.1473	0.00102307	0.00869193
ENSG00000117984.13	CTSD	-0.533098	8.36509	25.1455	0.00102331	0.00869193
ENSG00000132388.12	UBE2G1	0.618936	6.51106	25.1453	0.00102334	0.00869193
ENSG00000114125.13	RNF7	0.656376	5.99177	25.1409	0.00102389	0.00869193
ENSG00000175482.8	POLD4	-0.991174	3.20726	25.1349	0.00102466	0.00869193
ENSG00000281376.1	ABALON	1.59295	1.51781	25.131	0.00102515	0.00869193
ENSG00000139445.17	FOXN4	-1.43147	1.94492	25.1251	0.00102592	0.00869193
ENSG00000261150.2	EPPK1	-0.635015	7.29366	25.124	0.00102605	0.00869193
ENSG00000198892.6	SHISA4	-1.37224	1.74366	25.1184	0.00102677	0.00869303
ENSG00000162878.12	PKDCC	-0.812284	6.17673	25.0887	0.00103058	0.00872028
ENSG00000055950.16	MRPL43	0.642385	6.31058	25.0815	0.00103152	0.00872317
ENSG00000099365.10	STX1B	-1.53115	1.44831	25.0768	0.00103212	0.00872323
ENSG00000140853.15	NLRC5	-0.633039	5.59112	25.0502	0.00103556	0.00874732
ENSG00000118495.19	PLAGL1	-0.939802	4.28071	25.0221	0.0010392	0.0087668
ENSG00000121671.11	CRY2	0.73599	4.66319	25.0196	0.00103952	0.0087668
ENSG00000119392.14	GLE1	0.550169	7.02577	25.0182	0.00103971	0.0087668
ENSG00000137343.17	ATAT1	1.02938	2.87011	25.0141	0.00104025	0.0087668
ENSG00000183495.13	EP400	-0.774694	6.62298	24.9932	0.00104297	0.00878394
ENSG00000168970.22	JMJD7-PLA2G4B	-1.27026	2.01579	24.9862	0.00104388	0.00878394
ENSG00000086062.12	B4GALT1	-0.602083	8.26968	24.9838	0.00104419	0.00878394
ENSG00000104695.12	PPP2CB	0.596554	6.55014	24.9783	0.00104491	0.00878394
ENSG00000225648.5	SBDSP1	1.00888	4.18179	24.974	0.00104548	0.00878394
ENSG00000279413.1	AC112497.1	2.82549	-0.466202	24.9711	0.00104586	0.00878394
ENSG00000137713.15	PPP2R1B	0.624281	6.2373	24.9467	0.00104906	0.00880384
ENSG00000254996.5	ANKHD1-EIF4EBP3	-0.673716	5.0819	24.944	0.00104943	0.00880384
ENSG00000145494.11	NDUFS6	0.580354	7.72585	24.936	0.00105047	0.00880756
ENSG00000138623.10	SEMA7A	0.661006	5.13661	24.9183	0.00105281	0.00881732
ENSG00000197771.12	MCMBP	0.59004	7.12758	24.9182	0.00105283	0.00881732
ENSG00000111679.16	PTPN6	-0.861655	3.89918	24.9018	0.001055	0.00883046
ENSG00000173545.4	ZNF622	0.5603	6.777	24.8787	0.00105807	0.00885112
ENSG00000174574.15	AKIRIN1	0.59987	7.17494	24.8705	0.00105915	0.00885513
ENSG00000163875.15	MEAF6	0.661559	5.86159	24.8394	0.00106332	0.00887696
ENSG00000164294.13	GPX8	-0.766532	4.91445	24.8342	0.00106401	0.00887696
ENSG00000129625.12	REEP5	0.580697	7.14133	24.8338	0.00106406	0.00887696
ENSG00000136826.14	KLF4	-0.851998	4.61769	24.833	0.00106417	0.00887696
ENSG00000225484.6	NUTM2B-AS1	0.757949	4.4125	24.8014	0.00106841	0.00890446
ENSG00000234912.12	SNHG20	0.834174	3.87055	24.7994	0.00106868	0.00890446
ENSG00000026950.16	BTN3A1	-0.727561	4.85847	24.7888	0.00107012	0.00890816
ENSG00000163295.4	ALPI	-2.36084	0.351767	24.7871	0.00107034	0.00890816
ENSG00000205221.12	VIT	-4.75586	-1.75232	24.7634	0.00107355	0.0089296
ENSG00000131050.10	BPIFA2	-3.1977	-0.724616	24.7591	0.00107412	0.0089296
ENSG00000158864.12	NDUFS2	0.576993	8.16072	24.7523	0.00107504	0.00893221
ENSG00000113763.11	UNC5A	-0.961424	3.75658	24.7463	0.00107586	0.00893395
ENSG00000117133.10	RPF1	0.585305	6.46331	24.7087	0.00108099	0.00896923
ENSG00000234771.3	SLC25A25-AS1	1.08531	3.13314	24.7022	0.00108187	0.00896923
ENSG00000177602.5	HASPIN	-0.817463	4.26221	24.7017	0.00108194	0.00896923
ENSG00000103528.16	SYT17	-0.890181	3.64917	24.6576	0.001088	0.00901443
ENSG00000104613.11	INTS10	0.583852	6.45006	24.6368	0.00109086	0.00903307
ENSG00000086102.18	NFX1	-0.603944	6.15767	24.623	0.00109277	0.00904327
ENSG00000160799.11	CCDC12	0.663236	5.25378	24.6162	0.00109372	0.00904327
ENSG00000151292.17	CSNK1G3	0.734906	4.72414	24.6146	0.00109394	0.00904327
ENSG00000174744.13	BRMS1	0.623085	6.52269	24.5887	0.00109754	0.00906798
ENSG00000181610.12	MRPS23	0.577861	6.50212	24.5839	0.00109821	0.00906842
ENSG00000121766.15	ZCCHC17	0.607759	6.10041	24.5614	0.00110134	0.00908206
ENSG00000103275.19	UBE2I	0.544525	7.16067	24.554	0.00110239	0.00908206
ENSG00000179361.17	ARID3B	0.913194	4.87582	24.552	0.00110267	0.00908206
ENSG00000082397.17	EPB41L3	-1.77128	3.506	28.9958	0.00110308	0.00908206
ENSG00000173889.15	PHC3	-0.963888	4.24353	24.5424	0.00110401	0.00908206
ENSG00000099998.17	GGT5	-1.25919	2.13905	24.5415	0.00110414	0.00908206
ENSG00000170464.9	DNAJC18	-0.959935	3.16524	24.5412	0.00110418	0.00908206
ENSG00000136603.13	SKIL	0.821753	4.31907	24.5013	0.0011098	0.00911891
ENSG00000151729.10	SLC25A4	0.6661	5.45108	24.5006	0.0011099	0.00911891
ENSG00000239789.5	MRPS17	0.626214	5.58535	24.4827	0.00111243	0.0091346
ENSG00000171703.16	TCEA2	0.745494	4.5491	24.4648	0.00111497	0.00915036
ENSG00000227471.8	AKR1B15	-4.72586	-1.78748	24.4528	0.00111668	0.00915926
ENSG00000162408.10	NOL9	0.931515	5.37958	24.448	0.00111736	0.00915976
ENSG00000188707.5	ZBED6CL	0.913687	3.38099	24.4369	0.00111893	0.00916754
ENSG00000196821.9	C6orf106	-0.540427	7.63502	24.4298	0.00111995	0.00916797
ENSG00000253669.3	GASAL1	1.51522	1.33803	24.4278	0.00112023	0.00916797
ENSG00000100316.15	RPL3	-0.560811	11.1461	24.4166	0.00112184	0.00917607
ENSG00000278834.1	AC073508.3	-1.46528	1.49516	24.4113	0.0011226	0.00917677
ENSG00000108953.16	YWHAE	0.526419	9.81853	24.4073	0.00112318	0.00917677
ENSG00000142599.17	RERE	-0.663591	5.6756	24.3852	0.00112634	0.00919751
ENSG00000115761.15	NOL10	0.627643	5.8536	24.3663	0.00112907	0.00921467
ENSG00000217555.12	CKLF	0.693309	4.88346	24.3523	0.0011311	0.0092261
ENSG00000130270.16	ATP8B3	-0.90526	3.39939	24.3111	0.00113707	0.00926969
ENSG00000112297.14	CRYBG1	-1.01371	2.91456	24.2946	0.00113948	0.00928173
ENSG00000168477.19	TNXB	-1.40801	3.107	24.2923	0.00113981	0.00928173
ENSG00000106785.14	TRIM14	-0.618458	5.83066	24.2835	0.00114109	0.00928702
ENSG00000180573.9	HIST1H2AC	0.97764	3.53131	24.2713	0.00114287	0.00929642
ENSG00000226259.10	GTF2H2B	0.841004	4.20992	24.2646	0.00114387	0.00929789
ENSG00000204498.10	NFKBIL1	0.815176	4.57677	24.2615	0.00114432	0.00929789
ENSG00000185222.9	TCEAL9	-0.634941	5.36203	24.2382	0.00114774	0.00931448
ENSG00000131979.18	GCH1	0.919649	3.38164	24.2371	0.0011479	0.00931448
ENSG00000134508.12	CABLES1	-0.627412	5.70642	24.2347	0.00114826	0.00931448
ENSG00000114686.8	MRPL3	0.52777	7.49932	24.211	0.00115176	0.00933537
ENSG00000213563.6	C8orf82	0.750723	4.66632	24.2087	0.0011521	0.00933537
ENSG00000139438.5	FAM222A	1.00157	3.11464	24.1955	0.00115406	0.00933789
ENSG00000116991.10	SIPA1L2	-0.659298	5.24075	24.1933	0.00115438	0.00933789
ENSG00000081154.11	PCNP	-0.674845	5.94687	24.1914	0.00115466	0.00933789
ENSG00000122390.18	NAA60	0.597837	6.1401	24.1895	0.00115495	0.00933789
ENSG00000273301.1	AC016717.2	-1.1687	2.34178	24.1725	0.00115746	0.0093531
ENSG00000072849.10	DERL2	0.620831	5.60519	24.1461	0.00116141	0.00936922
ENSG00000223482.7	NUTM2A-AS1	0.789383	4.16583	24.141	0.00116217	0.00936922
ENSG00000134684.10	YARS	0.53114	7.77696	24.141	0.00116217	0.00936922
ENSG00000183337.16	BCOR	-0.616471	6.4571	24.138	0.00116262	0.00936922
ENSG00000157045.8	NTAN1	0.812166	4.27965	24.1378	0.00116264	0.00936922
ENSG00000137834.14	SMAD6	-0.851867	4.93357	24.128	0.00116411	0.00937111
ENSG00000157193.16	LRP8	-0.62957	6.32875	24.1276	0.00116418	0.00937111
ENSG00000125434.10	SLC25A35	-1.1582	3.70438	24.1235	0.00116478	0.00937111
ENSG00000151532.13	VTI1A	0.702247	4.73436	24.0952	0.00116905	0.00940026
ENSG00000185024.16	BRF1	0.664033	4.99103	24.0833	0.00117084	0.0094095
ENSG00000117899.10	MESD	0.572643	6.49469	24.0716	0.00117261	0.00941758
ENSG00000144580.13	CNOT9	0.562675	6.67783	24.0682	0.00117312	0.00941758
ENSG00000120805.13	ARL1	-0.633626	5.56499	24.0616	0.00117413	0.00942013
ENSG00000280789.1	PAGR1	-0.660369	5.05465	24.0577	0.00117472	0.00942013
ENSG00000155506.16	LARP1	-0.827332	8.38162	25.5098	0.00117647	0.00942908
ENSG00000125821.12	DTD1	0.663325	5.10204	24.0396	0.00117746	0.00943189
ENSG00000189339.11	SLC35E2B	-0.671613	5.13735	24.0304	0.00117887	0.00943798
ENSG00000005175.9	RPAP3	0.627308	5.45406	24.0007	0.0011834	0.00946417
ENSG00000146540.14	C7orf50	0.59654	6.33851	24.0005	0.00118342	0.00946417
ENSG00000234745.10	HLA-B	-0.629121	6.42349	23.9927	0.00118463	0.00946595
ENSG00000156508.17	EEF1A1	-0.532011	13.3902	23.9907	0.00118493	0.00946595
ENSG00000171840.11	NINJ2	-1.1913	2.64788	23.964	0.00118902	0.00948822
ENSG00000163131.10	CTSS	-1.49214	1.36019	23.9551	0.00119041	0.00948822
ENSG00000100154.14	TTC28	-0.771392	5.25337	23.9533	0.00119068	0.00948822
ENSG00000250067.11	YJEFN3	1.00815	2.86204	23.9517	0.00119092	0.00948822
ENSG00000108691.9	CCL2	-3.39381	-1.06982	23.9478	0.00119153	0.00948822
ENSG00000121281.12	ADCY7	-0.774118	4.47645	23.9474	0.00119159	0.00948822
ENSG00000116213.15	WRAP73	0.694061	4.73108	23.9395	0.00119282	0.00949289
ENSG00000236397.3	DDX11L2	3.18054	-1.30699	23.9249	0.00119507	0.00950567
ENSG00000150753.11	CCT5	0.524466	10.5767	23.9088	0.00119757	0.0095204
ENSG00000269243.1	AC008894.2	0.738871	4.88136	23.9044	0.00119825	0.00952072
ENSG00000144959.9	NCEH1	0.699383	5.65936	23.8972	0.00119938	0.00952449
ENSG00000130762.14	ARHGEF16	0.69145	5.11347	23.8915	0.00120025	0.0095263
ENSG00000068650.18	ATP11A	-0.786426	6.68162	23.8724	0.00120324	0.00954198
ENSG00000143756.11	FBXO28	0.596797	6.18023	23.8706	0.00120352	0.00954198
ENSG00000113575.9	PPP2CA	0.518789	7.77541	23.8555	0.00120588	0.00955466
ENSG00000160563.13	MED27	0.647699	5.14532	23.8521	0.00120642	0.00955466
ENSG00000197498.12	RPF2	0.632082	5.35902	23.8451	0.00120752	0.00955614
ENSG00000030582.17	GRN	-0.5176	8.48466	23.8426	0.0012079	0.00955614
ENSG00000099864.17	PALM	-0.665989	6.73384	23.788	0.00121652	0.00961912
ENSG00000071462.11	BUD23	0.544425	7.47331	23.7689	0.00121954	0.00963781
ENSG00000106049.8	HIBADH	-0.622567	5.60334	23.758	0.00122128	0.0096432
ENSG00000033011.12	ALG1	0.649607	5.20021	23.7564	0.00122153	0.0096432
ENSG00000148384.12	INPP5E	0.779763	4.18456	23.742	0.00122382	0.00965485
ENSG00000185591.9	SP1	-0.602916	7.08065	23.7338	0.00122514	0.00965485
ENSG00000137824.15	RMDN3	0.623598	5.47186	23.7308	0.00122562	0.00965485
ENSG00000140284.10	SLC27A2	-0.877952	3.93979	23.7307	0.00122563	0.00965485
ENSG00000101680.14	LAMA1	-0.610965	9.41675	23.6972	0.001231	0.00969198
ENSG00000100418.7	DESI1	-0.547353	6.90519	23.6882	0.00123245	0.00969379
ENSG00000213047.12	DENND1B	0.81173	3.95835	23.6876	0.00123255	0.00969379
ENSG00000113391.18	FAM172A	1.03652	2.77992	23.6716	0.00123513	0.0097089
ENSG00000139433.9	GLTP	0.671534	5.43144	23.6627	0.00123657	0.00971508
ENSG00000105011.8	ASF1B	-0.681199	5.84848	23.6547	0.00123786	0.00971999
ENSG00000198492.15	YTHDF2	-0.597283	5.99177	23.6431	0.00123974	0.00972779
ENSG00000040275.16	SPDL1	-0.668991	5.0713	23.6404	0.00124017	0.00972779
ENSG00000203668.2	CHML	-0.754416	5.72775	23.6357	0.00124093	0.00972857
ENSG00000169871.12	TRIM56	-0.621764	5.4092	23.6242	0.00124281	0.00973809
ENSG00000140406.3	TLNRD1	0.628878	5.36075	23.6089	0.00124529	0.00975237
ENSG00000172296.12	SPTLC3	-1.63984	1.13405	23.5923	0.00124801	0.00976843
ENSG00000274523.4	RCC1L	0.546164	6.81519	23.5801	0.00125001	0.00977185
ENSG00000148773.13	MKI67	-0.73297	6.69016	23.5773	0.00125048	0.00977185
ENSG00000120137.6	PANK3	0.653516	6.09262	23.5753	0.0012508	0.00977185
ENSG00000109133.12	TMEM33	0.587154	6.1837	23.5735	0.0012511	0.00977185
ENSG00000102172.15	SMS	0.512169	8.42451	23.5611	0.00125312	0.00978248
ENSG00000135249.7	RINT1	0.661226	4.94857	23.5481	0.00125527	0.00979405
ENSG00000054967.12	RELT	0.686647	5.04181	23.5374	0.00125703	0.00980258
ENSG00000177425.10	PAWR	0.754818	5.76651	23.496	0.00126389	0.00984659
ENSG00000011347.9	SYT7	-1.03957	3.1702	23.4953	0.00126401	0.00984659
ENSG00000175318.11	GRAMD2A	-1.58275	1.37177	23.468	0.00126855	0.00987658
ENSG00000143753.12	DEGS1	0.566975	8.22706	23.4641	0.0012692	0.00987658
ENSG00000171208.9	NETO2	-0.612679	5.57641	23.4424	0.00127283	0.00989082
ENSG00000167536.13	DHRS13	0.669745	4.85948	23.4415	0.00127298	0.00989082
ENSG00000230234.1	AL162582.1	-1.40393	1.53877	23.4411	0.00127305	0.00989082
ENSG00000143384.12	MCL1	0.616518	8.21064	23.432	0.00127458	0.00989746
ENSG00000176834.13	VSIG10	-0.785616	4.25041	23.4194	0.0012767	0.00990101
ENSG00000104343.19	UBE2W	0.791327	4.1635	23.4167	0.00127715	0.00990101
ENSG00000174842.16	GLMN	0.681291	4.84177	23.414	0.00127761	0.00990101
ENSG00000128563.13	PRKRIP1	0.634814	5.19094	23.4133	0.00127772	0.00990101
ENSG00000114439.18	BBX	-0.761544	5.86965	23.4075	0.00127871	0.00990206
ENSG00000143416.20	SELENBP1	-0.735715	6.07575	23.4045	0.0012792	0.00990206
ENSG00000196756.11	SNHG17	0.640342	5.45135	23.3964	0.00128058	0.00990748
ENSG00000110801.13	PSMD9	0.585446	6.15722	23.3832	0.00128281	0.00991956
ENSG00000131018.22	SYNE1	-1.07755	2.66821	23.3744	0.0012843	0.00992588
ENSG00000244398.1	AC116533.1	-0.724212	4.4937	23.3659	0.00128574	0.00993178
ENSG00000029534.20	ANK1	-1.42596	1.51165	23.358	0.00128708	0.00993438
ENSG00000054116.11	TRAPPC3	0.568155	6.5343	23.356	0.00128743	0.00993438
ENSG00000187240.14	DYNC2H1	-0.848423	4.14678	23.3346	0.00129106	0.00995231
ENSG00000089195.14	TRMT6	0.715837	4.52779	23.3344	0.0012911	0.00995231
ENSG00000140598.14	EFL1	0.627781	5.23495	23.327	0.00129236	0.00995679
ENSG00000011260.13	UTP18	0.567011	6.44218	23.2963	0.00129763	0.00999069
ENSG00000086189.9	DIMT1	0.721932	5.96365	23.2873	0.00129917	0.00999069
ENSG00000169249.12	ZRSR2	0.862399	3.54365	23.2851	0.00129955	0.00999069
ENSG00000069020.18	MAST4	-1.85933	0.802052	23.2838	0.00129976	0.00999069
ENSG00000079999.13	KEAP1	0.570579	6.39382	23.2783	0.00130071	0.00999069
ENSG00000211456.10	SACM1L	0.722248	4.72545	23.2776	0.00130083	0.00999069
ENSG00000172795.15	DCP2	0.688131	4.96929	23.2674	0.0013026	0.00999906
ENSG00000133316.15	WDR74	0.539967	6.80479	23.2479	0.00130596	0.0100194
ENSG00000092094.10	OSGEP	0.769469	4.44417	23.2433	0.00130676	0.0100194
ENSG00000271270.6	TMCC1-AS1	-1.22692	2.00766	23.2403	0.00130729	0.0100194
ENSG00000166562.8	SEC11C	0.650313	5.08717	23.2341	0.00130835	0.0100223
ENSG00000204160.11	ZDHHC18	-0.726412	4.499	23.2278	0.00130945	0.0100255
ENSG00000048162.20	NOP16	0.533367	6.93035	23.2219	0.00131047	0.0100281
ENSG00000137817.16	PARP6	0.615143	5.59844	23.2131	0.00131201	0.0100346
ENSG00000131650.13	KREMEN2	-1.31333	2.74237	23.2064	0.00131317	0.0100383
ENSG00000132781.17	MUTYH	-0.826408	4.35025	23.2008	0.00131416	0.0100407
ENSG00000146457.15	WTAP	0.622196	5.27966	23.1879	0.00131641	0.0100526
ENSG00000160191.17	PDE9A	-0.980977	4.09619	23.1724	0.00131912	0.0100681
ENSG00000157637.12	SLC38A10	-0.562584	6.73613	23.162	0.00132093	0.0100767
ENSG00000115541.10	HSPE1	0.532153	7.43427	23.1511	0.00132286	0.0100836
ENSG00000006016.10	CRLF1	-1.10724	2.96097	23.1455	0.00132384	0.0100836
ENSG00000176148.15	TCP11L1	-0.901422	4.01167	23.1453	0.00132388	0.0100836
ENSG00000142634.12	EFHD2	0.589249	8.14988	23.1267	0.00132716	0.0101033
ENSG00000186312.10	CA5BP1	0.892306	3.86024	23.1226	0.00132788	0.0101035
ENSG00000171314.8	PGAM1	0.503415	10.0046	23.0923	0.00133325	0.0101377
ENSG00000197860.9	SGTB	0.950423	3.90883	23.0895	0.00133375	0.0101377
ENSG00000137460.8	FHDC1	-0.996811	2.91137	23.0443	0.00134181	0.0101937
ENSG00000100564.8	PIGH	0.799639	4.03671	23.0236	0.00134553	0.0102167
ENSG00000164924.17	YWHAZ	0.505424	9.35298	22.9969	0.00135034	0.0102438
ENSG00000135862.5	LAMC1	-0.945307	8.70554	26.9901	0.00135049	0.0102438
ENSG00000249863.2	AC021106.1	-4.73857	-1.7159	22.9878	0.00135198	0.0102499
ENSG00000283828.1	AL137002.2	2.20202	-0.109541	22.9663	0.00135588	0.0102741
ENSG00000145293.15	ENOPH1	0.631627	5.14132	22.9503	0.00135879	0.0102908
ENSG00000267368.1	UPK3BL1	0.943185	3.07584	22.9443	0.00135988	0.0102938
ENSG00000004700.15	RECQL	-0.680678	5.12458	22.9404	0.00136058	0.0102939
ENSG00000173905.8	GOLIM4	-0.690248	5.04944	22.9338	0.00136178	0.0102977
ENSG00000138162.18	TACC2	-0.545693	7.08598	22.9246	0.00136347	0.0103036
ENSG00000160867.14	FGFR4	-0.620393	5.46233	22.9203	0.00136425	0.0103036
ENSG00000065243.19	PKN2	0.585963	6.70279	22.9142	0.00136537	0.0103036
ENSG00000089127.12	OAS1	-0.634297	5.10798	22.913	0.00136559	0.0103036
ENSG00000149679.11	CABLES2	-0.892432	3.3318	22.9094	0.00136625	0.0103036
ENSG00000100294.12	MCAT	0.608904	5.62281	22.9029	0.00136744	0.0103036
ENSG00000185950.8	IRS2	-0.670812	6.09095	22.9027	0.00136747	0.0103036
ENSG00000215440.11	NPEPL1	0.686472	5.67564	22.8828	0.00137113	0.0103123
ENSG00000180773.14	SLC36A4	0.802169	3.95693	22.8828	0.00137113	0.0103123
ENSG00000135250.16	SRPK2	0.601237	5.90178	22.8824	0.00137119	0.0103123
ENSG00000166866.12	MYO1A	-1.71868	0.840436	22.8812	0.00137142	0.0103123
ENSG00000064687.12	ABCA7	-0.76911	6.15299	22.856	0.00137607	0.0103398
ENSG00000002919.14	SNX11	0.713735	4.85364	22.8501	0.00137716	0.0103398
ENSG00000108960.8	MMD	-0.864033	3.5192	22.8499	0.00137719	0.0103398
ENSG00000090006.17	LTBP4	-0.666762	5.53563	22.8385	0.0013793	0.0103498
ENSG00000147403.16	RPL10	-0.50227	10.4238	22.8352	0.00137993	0.0103498
ENSG00000170442.11	KRT86	1.29812	2.77061	22.8078	0.00138501	0.0103826
ENSG00000265817.2	FSBP	1.40723	1.64981	22.7956	0.00138729	0.0103937
ENSG00000165458.13	INPPL1	-0.516983	8.15848	22.7905	0.00138824	0.0103937
ENSG00000032444.16	PNPLA6	0.574859	6.79403	22.7877	0.00138876	0.0103937
ENSG00000198815.8	FOXJ3	-0.714415	5.74108	22.7848	0.00138931	0.0103937
ENSG00000103145.10	HCFC1R1	-0.704452	4.66835	22.7728	0.00139156	0.0104052
ENSG00000198554.11	WDHD1	-0.817274	3.84852	22.7582	0.00139429	0.0104158
ENSG00000107371.12	EXOSC3	0.603983	5.65213	22.7577	0.00139438	0.0104158
ENSG00000075914.12	EXOSC7	0.640088	5.7277	22.7484	0.00139614	0.0104163
ENSG00000154839.9	SKA1	0.748452	4.31896	22.7465	0.00139649	0.0104163
ENSG00000019995.6	ZRANB1	0.647717	4.99644	22.7461	0.00139657	0.0104163
ENSG00000104774.12	MAN2B1	-0.558081	6.46571	22.7202	0.00140145	0.0104412
ENSG00000181577.15	C6orf223	-1.24879	2.25218	22.7198	0.00140154	0.0104412
ENSG00000124225.15	PMEPA1	0.705248	5.84191	22.7171	0.00140205	0.0104412
ENSG00000123064.12	DDX54	0.502623	8.19434	22.7027	0.00140476	0.0104562
ENSG00000105640.12	RPL18A	-0.502751	10.0127	22.6931	0.00140659	0.0104645
ENSG00000085832.16	EPS15	-0.752954	4.86057	22.6889	0.00140739	0.0104652
ENSG00000248092.7	NNT-AS1	-1.09507	3.09943	22.6848	0.00140817	0.0104657
ENSG00000230438.6	SERPINB9P1	-1.72165	1.36141	22.6472	0.00141533	0.0105124
ENSG00000138439.11	FAM117B	0.834805	3.6903	22.6414	0.00141646	0.0105124
ENSG00000214046.8	SMIM7	0.631898	5.64216	22.6349	0.00141769	0.0105124
ENSG00000188603.19	CLN3	0.632216	5.12581	22.6344	0.0014178	0.0105124
ENSG00000141425.17	RPRD1A	-0.683381	5.11627	22.6332	0.00141803	0.0105124
ENSG00000136478.7	TEX2	-0.733419	5.65745	22.626	0.00141941	0.0105174
ENSG00000178199.13	ZC3H12D	-2.40142	-0.34774	22.6174	0.00142106	0.0105243
ENSG00000187792.4	ZNF70	-1.37244	1.6583	22.5973	0.00142494	0.0105477
ENSG00000170145.4	SIK2	-0.575839	6.35614	22.5809	0.00142811	0.0105658
ENSG00000031823.14	RANBP3	0.631755	5.95574	22.5621	0.00143176	0.0105875
ENSG00000187024.14	PTRH1	-0.90883	3.25435	22.5546	0.00143321	0.010593
ENSG00000173212.4	MAB21L3	-2.16122	0.208562	22.5489	0.00143432	0.0105958
ENSG00000181873.12	IBA57	0.642902	5.04509	22.5407	0.00143591	0.0105987
ENSG00000181381.13	DDX60L	-0.940678	3.08919	22.5395	0.00143615	0.0105987
ENSG00000196387.9	ZNF140	1.14147	2.21518	22.5342	0.00143718	0.010601
ENSG00000132466.18	ANKRD17	-0.771566	6.69365	22.5208	0.00143979	0.0106037
ENSG00000106263.17	EIF3B	0.498589	9.13174	22.5194	0.00144006	0.0106037
ENSG00000152620.12	NADK2	0.660723	5.99685	22.5136	0.00144122	0.0106037
[truncated: 12,724 more rows]
