# Supplementary material for: Comparative interactome analysis of α-arrestin families in human and Drosophila
Source: eLife. 2024 Jan 25;12:RP88328. doi: 10.7554/eLife.88328 (PMC10945707; doi:10.7554/eLife.88328)
Supplement: Supplementary file 11. — (A) Profiles of ATAC-seq peaks located in promoters of genes. Changes in peak intensities and gene expression levels are also summarized. (B) List of genes that exhibited decreased chromatin accessibility at their promoter and decreased RNA expression upon TXNIP knockdown. [file elife-88328-supp11.xlsx]

## Sheet: A. ATAC peaks in gene promoters
peak ID	peak log2 mean count (control)	peak log2 mean count (TXNIP Knock down)	peak mean log2 fold change	peak log2 fold change (max intensity)	peak FDR (max intensity)	gene ID	gene symbol	gene mean TPM (control)	gene mean TPM (TXNIP knock down)	gene log2 fold change	gene FDR
chr19_40777980_40778380	6.35965	6.62781	0.268162	0.461082	0.403108	ENSG00000167578.17	RAB4B	2.84645	2.79184	0.0174014	0.963834
chr16_970871_971271	4.15126	4.56712	0.41587	0.585386	0.371334	ENSG00000103227.18	LMF1	1.8871	0.861757	-0.793035	0.0520936
chr6_33711574_33711974	5.22672	5.61664	0.650849	0.593245	0.261789	ENSG00000137288.9	UQCC2	6.51488	6.06662	-0.367792	0.0798649
chr11_63813177_63813577	4.6236	4.16693	-0.456678	-0.330377	0.676219	ENSG00000168005.8	SPINDOC	4.73072	5.27208	0.574906	0.0128689
chr17_28719536_28719936	6.45465	6.99684	0.542182	0.754228	0.116384	ENSG00000198242.13	RPL23A	10.1908	9.67208	-0.463535	0.0166643
chr8_144508612_144509012	6.46254	6.85558	0.393046	0.592931	0.246454	ENSG00000167700.8	MFSD3	5.6041	5.35892	-0.23808	0.30456
chr19_12806344_12806744	6.25964	6.51295	0.253303	0.440258	0.427651	ENSG00000104889.6	RNASEH2A	6.12321	5.75109	-0.37784	0.0521
chr7_134459004_134459404	6.96524	6.75172	-0.646603	-0.0208019	0.983418	ENSG00000085662.13	AKR1B1	8.1806	7.22681	-0.934567	0.00173621
chr10_114526696_114527096	6.49032	6.47796	-0.652079	0.20134	0.783697	ENSG00000099204.19	ABLIM1	5.31168	4.54227	-0.580069	0.0166576
chr19_344661_345061	4.99492	5.41189	0.416966	0.556187	0.31106	ENSG00000105556.11	MIER2	4.55027	4.88681	0.522456	0.0257458
chr14_53153171_53153571	6.36756	5.98474	-0.382823	-0.18837	0.794793	ENSG00000100523.14	DDHD1	1.11233	1.41839	0.332055	0.281571
chr2_37084238_37084638	7.12967	6.72858	-0.401093	-0.214566	0.770742	ENSG00000008869.11	HEATR5B	2.19846	1.8968	-0.275646	0.402522
chr7_140398315_140398715	6.34986	6.12446	-0.225405	-0.0128563	0.989075	ENSG00000157800.17	SLC37A3	4.14991	4.11924	-0.140121	0.487364
chr16_1343038_1343438	6.52058	6.92688	0.406301	0.619229	0.225783	ENSG00000007516.13	BAIAP3	-1.06298	-1.34112	0.113928	0.873459
chr5_177554403_177554803	4.90818	5.16965	-0.388928	0.374928	0.568785	ENSG00000146067.15	FAM193B	4.6015	4.73464	0.124778	0.549202
chr11_46617027_46617427	6.03892	6.0322	-0.00672218	0.188792	0.793983	ENSG00000180423.4	HARBI1	1.23671	1.66581	0.487129	0.19318
chr9_136727979_136728379	4.91524	4.94181	0.0265716	0.210295	0.797476	ENSG00000233016.6	SNHG7	5.72509	5.93515	0.183148	0.368735
chr19_32405445_32405845	7.34544	6.73332	-0.612116	-0.40391	0.509929	ENSG00000178904.18	DPY19L3	1.76027	1.87723	-0.206895	0.467977
chr7_152463742_152464142	7.84342	7.91461	0.0711891	0.271103	0.723945	ENSG00000261455.1	LINC01003	0.0551816	-0.0104629	-0.0486112	0.950287
chr3_149970710_149971110	5.50346	4.89978	-0.603683	-0.439836	0.468567	ENSG00000070087.14	PFN2	4.68037	4.10176	-0.476216	0.0343559
chr7_154928249_154928649	5.10181	4.63224	-0.469568	-0.245274	0.763645	ENSG00000214106.8	PAXIP1-AS2	0.36494	0.187534	-0.264958	0.568981
chr5_176537791_176538191	7.04295	7.20486	0.196038	0.359143	0.575861	ENSG00000146083.11	RNF44	4.0458	4.24061	0.289589	0.117403
chr16_67198328_67198728	2.68644	3.39988	0.71344	0.848321	0.429112	ENSG00000102890.14	ELMO3	0.751827	0.860796	0.214458	0.61462
chr9_124453455_124453855	5.73834	5.53851	-0.199834	-0.00766565	0.993224	ENSG00000180264.11	ADGRD2	-0.475882	-0.317994	-0.139151	0.868021
chr14_45135722_45136122	6.19318	5.65557	-0.722256	-0.345373	0.566854	ENSG00000187790.10	FANCM	0.711009	0.964214	0.0357831	0.926041
chr9_35665074_35665474	5.16862	5.20639	0.0377703	0.242085	0.748801	ENSG00000137135.17	ARHGEF39	3.91671	2.27717	-1.4197	0.00210048
chr2_86719795_86720195	4.4991	4.60539	0.63204	0.330049	0.674348	ENSG00000153561.12	RMND5A	4.61732	5.03754	-0.0504193	0.781832
chr19_12945727_12946127	6.53359	6.71519	0.181594	0.369099	0.541583	ENSG00000179262.9	RAD23A	7.63724	7.7751	0.22234	0.188756
chr19_12610645_12611045	5.60193	5.92767	0.325735	0.526857	0.314629	ENSG00000173875.13	ZNF791	3.39125	2.78059	0.151089	0.506312
chr9_131373345_131373745	6.94859	7.34404	0.405939	0.590871	0.27087	ENSG00000130723.19	PRRC2B	6.34047	5.72099	-0.39672	0.036943
chr3_49903691_49904091	5.48829	5.75477	0.266481	0.424539	0.454406	ENSG00000164078.12	MST1R	4.11987	3.06225	-1.10676	0.00205092
chr19_39193746_39194146	3.81102	2.69896	-1.11207	-0.968484	0.268807	ENSG00000188505.4	NCCRP1	-0.623027	-1.41619	-1.04004	0.161283
chr17_14069256_14069656	6.82307	6.46121	-0.361863	-0.160026	0.837056	ENSG00000006695.10	COX10	4.4795	4.544	0.0877359	0.646348
chr17_81959731_81960131	3.95028	3.80939	-0.14089	0.00402848	0.997454	ENSG00000185269.11	NOTUM	2.96373	2.18735	-0.941956	0.0203713
chr11_67428229_67428629	4.89903	5.25316	0.354127	0.550823	0.344653	ENSG00000175634.14	RPS6KB2	6.31603	6.23895	-0.0940404	0.5702
chr19_49478733_49479133	3.31666	3.86228	0.545623	0.759435	0.347367	ENSG00000090554.12	FLT3LG	1.27229	0.809918	-0.508138	0.455255
chr3_100400938_100401338	6.81412	6.88951	0.0753901	0.265653	0.699573	ENSG00000206535.7	LNP1	0.73858	0.162578	-0.613498	0.170907
chr19_42075795_42076195	5.95718	6.71351	0.756334	0.940543	0.0290583	ENSG00000105732.12	ZNF574	2.9534	3.30856	0.373372	0.0987552
chr1_47997536_47997936	5.5044	5.42533	-0.0790765	0.0846163	0.922178	ENSG00000269113.3	TRABD2B	-1.26976	-1.94342	-0.985702	0.0792335
chr17_44947613_44948013	4.95353	5.37549	-0.289208	0.595778	0.276116	ENSG00000186185.13	KIF18B	4.4718	4.23236	-0.166315	0.434215
chr20_3407838_3408238	5.34549	4.60316	-0.742329	-0.557273	0.345604	ENSG00000088854.12	C20orf194	0.318179	-0.118592	-0.493422	0.153001
chr10_70403897_70404297	5.67421	5.89208	0.21787	0.418675	0.462963	ENSG00000148730.6	EIF4EBP2	4.33381	3.05025	-1.28317	0.00328762
chr2_11746423_11746823	7.5909	7.14246	-0.448443	-0.262664	0.717892	ENSG00000134324.11	LPIN1	4.11887	3.78158	-0.104938	0.598255
chr2_203014505_203014905	7.21033	6.8122	-0.398129	-0.199046	0.793332	ENSG00000138442.9	WDR12	5.81638	6.25035	0.184951	0.28433
chr11_17276382_17276782	7.13031	6.67223	-0.348592	-0.253607	0.719156	ENSG00000070081.16	NUCB2	4.53422	4.49668	-0.148529	0.497867
chr1_9943162_9943562	5.5508	5.62778	0.0769822	0.291707	0.661558	ENSG00000162441.11	LZIC	3.37258	4.25317	0.734922	0.0232612
chr20_64049291_64049691	4.04422	3.58342	-0.460801	-0.390613	0.665598	ENSG00000203883.6	SOX18	2.54627	2.02325	-0.514226	0.126356
chr1_6260139_6260539	3.58092	4.00296	0.422036	0.608003	0.441884	ENSG00000158292.6	GPR153	1.03051	1.45667	0.437257	0.322458
chr20_49915561_49915961	5.8176	5.9393	0.121698	0.343292	0.578768	ENSG00000158480.10	SPATA2	2.80796	3.01525	0.218461	0.343509
chr1_75724500_75724900	9.40825	8.77479	-0.681703	-0.426289	0.600285	ENSG00000117054.13	ACADM	6.59851	6.0919	-0.446843	0.022379
chr5_95712404_95712804	7.39327	6.68927	-0.5447	-0.481374	0.407609	ENSG00000164292.12	RHOBTB3	3.82045	2.40509	-1.51434	0.000812677
chr6_111483520_111483920	7.32069	7.07927	-0.241419	-0.0259399	0.979742	ENSG00000009413.15	REV3L	0.530646	1.08049	0.147283	0.677232
chr10_23438782_23439182	7.80864	7.4612	-0.347444	-0.155085	0.855884	ENSG00000165312.6	OTUD1	2.99254	3.49953	0.521878	0.0359071
chr12_105330448_105330848	5.39864	4.87701	-0.521632	-0.324177	0.640203	ENSG00000235162.8	C12orf75	4.45181	3.9406	-0.630941	0.0339953
chr1_86704559_86704959	9.46963	9.07455	-0.395077	-0.187851	0.857974	ENSG00000097033.14	SH3GLB1	6.03225	6.0068	-0.223338	0.205424
chr1_59814498_59814898	8.22194	7.48171	-0.740234	-0.54612	0.365891	ENSG00000134709.10	HOOK1	1.40932	1.44007	0.151814	0.546319
chr17_44123665_44124065	5.11962	5.48199	0.202652	0.52889	0.338841	ENSG00000108840.15	HDAC5	3.66499	3.67518	0.0617932	0.882505
chr12_123233032_123233432	6.58153	6.77857	0.197044	0.3789	0.527993	ENSG00000051825.14	MPHOSPH9	3.11582	3.57743	0.0817739	0.780452
chr9_86947511_86947911	5.84665	5.59932	-0.247334	-0.0376917	0.967573	ENSG00000180447.6	GAS1	3.42329	2.5905	-0.832067	0.0126336
chrX_71118376_71118776	4.89227	5.20281	0.310535	0.561151	0.356981	ENSG00000184634.15	MED12	4.44961	4.21613	-0.409054	0.0596983
chr5_66144056_66144456	7.3823	7.31975	-0.260625	0.134531	0.874387	ENSG00000153914.15	SREK1	3.3811	3.27006	0.110381	0.595769
chr2_219206553_219206953	6.66894	6.43881	-0.230129	-0.0340558	0.970688	ENSG00000158552.12	ZFAND2B	3.21035	4.32662	1.07747	0.00802069
chr7_103074736_103075136	7.80781	7.41519	-0.392616	-0.190883	0.815408	ENSG00000161040.16	FBXL13	-1.48289	-0.564078	0.9596	0.223424
chr5_163460326_163460726	8.28261	7.74541	-0.5372	-0.335902	0.646317	ENSG00000072571.19	HMMR	4.07251	3.19747	-0.780849	0.00596841
chr7_143288102_143288502	8.23673	7.8945	-0.342237	-0.14234	0.875818	ENSG00000106144.19	CASP2	4.15858	3.66581	-0.470301	0.0578482
chr12_48157378_48157778	6.04277	6.26927	0.226503	0.442141	0.428581	ENSG00000177981.10	ASB8	4.25502	4.64498	0.398866	0.0491443
chr6_150005112_150005512	6.20418	6.20332	-0.000861943	0.178182	0.807164	ENSG00000218358.2	RAET1K	-0.134408	-0.445286	-0.274415	0.661073
chr15_90592200_90592600	6.01464	5.12927	-0.385521	-0.666446	0.184332	ENSG00000140577.15	CRTC3	5.28934	4.49144	-0.74257	0.00334632
chrX_1452777_1453177	7.21748	7.65759	0.0611638	0.657034	0.222554	ENSG00000169093.15	ASMTL	4.21435	4.50107	0.29992	0.190522
chr1_162497651_162498051	6.23614	6.38978	0.15364	0.363713	0.544835	ENSG00000152332.15	UHMK1	3.94946	4.6386	0.706266	0.00548793
chr3_136752336_136752736	8.28366	7.9192	-0.364713	-0.151943	0.867184	ENSG00000118007.12	STAG1	2.16402	2.52123	0.398578	0.0940194
chr12_7018530_7018930	7.89334	7.76547	-0.127876	0.0708016	0.942949	ENSG00000111684.10	LPCAT3	6.56356	6.29033	-0.25615	0.108434
chr8_141228421_141228821	7.05679	6.01273	-0.259015	-0.796708	0.0976727	ENSG00000022567.9	SLC45A4	4.95569	4.60658	-0.280932	0.107994
chr9_114155213_114155613	5.20211	4.94637	0.0181532	-0.08773	0.924518	ENSG00000196739.14	COL27A1	3.2172	2.21044	-0.88172	0.00342899
chr13_41263583_41263983	5.30863	5.04108	-0.267553	-0.0886703	0.922278	ENSG00000120662.15	MTRF1	2.13067	3.12029	0.423696	0.199022
chr1_246566199_246566599	8.79146	8.42325	-0.36821	-0.166801	0.861417	ENSG00000162851.7	TFB2M	4.29937	5.03078	0.747611	0.00566444
chr12_93467398_93467798	6.29358	6.51027	0.216685	0.389818	0.499821	ENSG00000198015.12	MRPL42	5.71834	5.85121	-0.0901939	0.64888
chr8_22089086_22089486	4.27029	4.07726	0.349397	-0.0555381	0.961217	ENSG00000158863.21	FAM160B2	4.15023	4.12432	0.0983035	0.603941
chr16_3654233_3654633	3.69688	4.00135	0.304478	0.428945	0.619833	ENSG00000213918.10	DNASE1	1.9371	2.16831	0.101934	0.728766
chr2_238137309_238137709	3.39721	2.45661	-0.940604	-0.772878	0.52156	ENSG00000168427.8	KLHL30	-1.54402	-2.80764	-2.56678	0.0156887
chr14_60724178_60724578	6.3661	5.98614	-0.379955	-0.188913	0.793566	ENSG00000100625.8	SIX4	2.66706	2.77032	0.0375987	0.888577
chr1_202967191_202967591	5.25949	5.97133	0.453876	0.909198	0.0404354	ENSG00000159348.12	CYB5R1	5.27907	5.00498	-0.28906	0.123349
chr1_78004641_78005041	8.96957	8.35193	-0.617642	-0.423087	0.573183	ENSG00000162616.8	DNAJB4	5.27683	5.59044	0.470071	0.0624472
chr4_41360494_41360894	6.31649	6.15417	0.108543	0.0586108	0.9479	ENSG00000064042.17	LIMCH1	5.65229	5.90031	0.0329468	0.847998
chr12_32106594_32106994	6.70623	6.52633	-0.0342222	0.0430344	0.963564	ENSG00000151746.13	BICD1	3.2011	3.28475	0.028239	0.914647
chr17_41521663_41522063	4.35641	4.08829	-0.268122	-0.0775205	0.944088	ENSG00000171346.15	KRT15	2.8505	1.88539	-0.930699	0.0263327
chr6_43181978_43182378	4.44452	4.46943	0.0249157	0.197052	0.827722	ENSG00000112659.13	CUL9	3.42232	3.7073	-0.336473	0.0868555
chr12_52163919_52164319	4.53764	5.01225	0.400776	0.661026	0.253329	ENSG00000258279.3	LINC00592	0.0541786	-0.991395	-1.18151	0.195691
chr11_111870880_111871280	5.45888	5.16373	-0.213141	-0.071832	0.938965	ENSG00000086848.14	ALG9	5.92088	5.99419	0.0171819	0.934937
chr11_66070313_66070713	3.80062	4.39635	0.636892	0.748417	0.243628	ENSG00000175115.11	PACS1	5.44187	5.08042	-0.333862	0.0512381
chr11_46918326_46918726	5.18235	4.6081	-0.501404	-0.424833	0.51708	ENSG00000134569.9	LRP4	3.40639	3.14041	-0.690876	0.0133494
chr11_12989365_12989765	5.33324	5.43474	0.101506	0.291906	0.667026	ENSG00000251381.7	LINC00958	6.05072	4.61596	-1.37054	0.000812677
chr13_78658874_78659274	7.15709	6.6306	-0.526493	-0.331522	0.606139	ENSG00000152193.7	RNF219	2.88047	3.09421	0.233753	0.317002
chr19_36115175_36115575	6.99343	6.90799	-0.0854412	0.1065	0.899573	ENSG00000105254.11	TBCB	6.56924	6.2434	-0.177109	0.320772
chr7_102273866_102274266	5.63511	6.10443	-0.150939	0.654377	0.172226	ENSG00000257923.10	CUX1	4.55121	4.41652	-0.222542	0.24242
chr11_93784052_93784452	7.86057	7.50593	-0.354644	-0.163162	0.847437	ENSG00000042429.11	MED17	4.58404	5.37673	0.800481	0.00441031
chr19_8526164_8526564	3.90347	4.36	0.456537	0.638709	0.344712	ENSG00000142347.17	MYO1F	-0.908019	-1.44448	-1.49755	0.0394914
chr11_117178582_117178982	5.81489	5.9751	0.160216	0.379861	0.524507	ENSG00000149577.15	SIDT2	2.88048	3.5551	0.663695	0.0131177
chr7_141702006_141702406	6.48747	6.11879	-0.368683	-0.263746	0.685714	ENSG00000257093.6	KIAA1147	3.12568	2.75596	-0.512707	0.0369205
chr7_975234_975634	5.26323	5.66068	0.397452	0.592876	0.255184	ENSG00000240230.5	COX19	2.55498	2.62248	0.140153	0.552532
chr6_11770782_11771182	7.74089	7.72365	-0.218292	0.19559	0.812382	ENSG00000111863.12	ADTRP	-0.282026	0.679592	0.904327	0.148278
chr6_99520832_99521232	6.75053	6.44786	-0.302664	-0.108618	0.895337	ENSG00000228439.5	TSTD3	0.398506	1.12745	0.797916	0.175297
chr4_25160242_25160642	6.1779	6.08451	-0.0933817	0.107005	0.895157	ENSG00000109618.11	SEPSECS	1.46763	1.51136	-0.195565	0.52551
chr5_82295148_82295548	2.67463	3.10743	0.432797	0.623866	0.650151	ENSG00000205464.12	ATP6AP1L	0.625723	0.756998	0.171398	0.770975
chr14_74084387_74084787	7.21151	7.1827	-0.0288106	0.167993	0.83445	ENSG00000119711.12	ALDH6A1	2.52904	1.82912	-0.49166	0.0849159
chr1_192808718_192809118	8.96328	8.29001	-0.401087	-0.482713	0.498706	ENSG00000116741.7	RGS2	6.04792	6.25169	0.249894	0.169489
chr17_1456168_1456568	6.34265	6.68143	0.338779	0.526768	0.315455	ENSG00000167193.7	CRK	4.26514	4.28236	0.0361184	0.879394
chr7_134779332_134779732	7.51839	6.7741	-0.974146	-0.519064	0.363964	ENSG00000122786.19	CALD1	4.52113	3.70185	-0.647384	0.00817047
chr1_35079303_35079703	5.69785	5.46855	-0.442254	-0.0624201	0.943923	ENSG00000197056.10	ZMYM1	2.42159	2.57488	-0.405599	0.149303
chr22_38681697_38682097	5.10598	5.52445	0.418468	0.634025	0.233621	ENSG00000100216.5	TOMM22	6.61778	7.05416	0.444767	0.0190796
chr15_55993514_55993914	6.37218	6.24477	-1.46158	0.0576319	0.948227	ENSG00000069869.16	NEDD4	1.75114	2.20027	0.452168	0.0625211
chr2_219498488_219498888	7.771	7.69917	-0.0718233	0.11579	0.897972	ENSG00000144591.18	GMPPA	5.73556	5.26093	-0.481838	0.0241135
chr2_27322862_27323262	5.92473	6.28102	0.356292	0.553167	0.274844	ENSG00000115204.14	MPV17	6.8219	6.34365	-0.476587	0.0225806
chr9_87974513_87974913	5.95295	6.38524	0.432289	0.608782	0.210601	ENSG00000156345.17	CDK20	1.60329	1.35641	-0.30608	0.380261
chr14_30622091_30622491	6.16403	6.03956	-0.124467	0.083819	0.921065	ENSG00000092108.20	SCFD1	3.61158	3.978	0.415163	0.0836132
chr5_110738892_110739292	8.28531	7.64961	-0.635704	-0.436168	0.512957	ENSG00000164209.16	SLC25A46	4.51162	4.5136	-0.0724888	0.699338
chr6_155314449_155314849	8.63163	8.00921	-0.622426	-0.428518	0.544495	ENSG00000029639.10	TFB1M	4.21133	4.31553	0.0727787	0.760636
chr16_69311077_69311477	6.05293	6.52994	0.477013	0.700431	0.145361	ENSG00000132612.15	VPS4A	5.10689	5.44522	0.284822	0.0912281
chr15_66497691_66498091	6.04817	6.33698	0.288805	0.516833	0.331542	ENSG00000174446.12	SNAPC5	5.21273	4.44003	-0.741175	0.0114633
chr11_47848264_47848664	6.55181	6.40048	-0.151328	0.063641	0.943166	ENSG00000030066.13	NUP160	5.59899	5.81529	0.188375	0.261743
chr16_75251462_75251862	6.04895	5.68779	-0.524167	-0.173415	0.814011	ENSG00000050820.16	BCAR1	5.44355	5.53094	0.0282791	0.879255
chr18_11980844_11981244	7.32278	7.37453	0.0517464	0.254695	0.728598	ENSG00000141401.11	IMPA2	6.85137	6.2786	-0.55362	0.0107025
chr1_16889356_16889756	2.1804	3.3177	1.13731	1.24406	0.259739	ENSG00000238142.1	BX284668.5	2.38932	2.60648	0.293906	0.657365
chr11_71928699_71929099	4.90584	5.24876	0.342922	0.55612	0.343083	ENSG00000137522.17	RNF121	3.78572	4.07381	0.277398	0.254147
chr2_207529740_207530140	8.19915	7.88658	-0.462333	-0.132075	0.885819	ENSG00000118260.14	CREB1	3.39551	3.4272	-0.562103	0.0478784
chr1_200620621_200621021	7.02523	6.75034	0.0271169	-0.0554274	0.952625	ENSG00000118193.11	KIF14	1.57994	1.23745	-0.374274	0.250776
chr1_65420176_65420576	9.12082	9.09608	-0.0247385	0.176643	0.863867	ENSG00000213625.8	LEPROT	4.60212	4.06573	-0.709937	0.00644845
chr1_182839215_182839615	7.55828	7.55637	-0.00190727	0.212589	0.788389	ENSG00000135829.16	DHX9	6.73995	6.89529	-0.0077832	0.974703
chr22_41286173_41286573	6.61308	7.0048	0.646904	0.578323	0.267616	ENSG00000100401.19	RANGAP1	6.90896	7.23864	0.361252	0.0459082
chr1_78649607_78650007	5.34891	4.72621	-0.622694	-0.50734	0.388876	ENSG00000137965.10	IFI44	3.14593	2.48865	-0.594003	0.0495993
chr12_113422150_113422550	5.77111	5.34767	-0.42344	-0.222227	0.758261	ENSG00000139410.14	SDSL	1.64578	2.32762	0.822833	0.0435139
chr10_94320377_94320777	2.79169	3.25819	0.466498	0.62631	0.610751	ENSG00000138193.15	PLCE1	-1.40853	-2.35137	-1.35817	0.0250583
chr19_4968699_4969099	6.78791	7.22881	-0.451615	0.623099	0.228315	ENSG00000127663.14	KDM4B	3.24267	3.56494	0.392884	0.0502557
chr3_124887190_124887590	5.95889	5.83787	0.0304569	0.0690792	0.935738	ENSG00000082781.11	ITGB5	7.47693	7.23431	-0.0217909	0.908409
chr12_6937833_6938233	5.92575	6.03182	0.119793	0.280909	0.659095	ENSG00000111676.14	ATN1	6.3449	4.83692	-1.49374	0.000455879
chr15_65517523_65517923	6.02194	6.0612	0.0392598	0.232677	0.732456	ENSG00000074603.18	DPP8	3.14627	3.92919	-0.00275624	0.990695
chr2_99180928_99181328	6.16249	5.9241	-0.238396	-0.0162109	0.986641	ENSG00000158411.11	MITD1	4.24165	4.70397	0.413715	0.111412
chr17_27893140_27893540	5.71085	6.11125	0.4004	0.594637	0.229282	ENSG00000232859.9	LYRM9	2.33887	1.15703	-1.47725	0.0156726
chr3_179071615_179072015	7.09362	6.69	-0.40362	-0.211338	0.775671	ENSG00000172667.10	ZMAT3	2.60576	2.82729	-0.306626	0.135992
chr12_113184780_113185180	6.39798	6.45148	0.187346	0.248545	0.714222	ENSG00000123064.12	DDX54	7.03278	7.68121	0.502623	0.0104562
chr17_9645195_9645595	5.12918	5.18991	0.197837	0.275847	0.708728	ENSG00000154914.16	USP43	2.48499	2.4028	-0.0616839	0.807477
chrX_47658572_47658972	6.54194	6.41469	-0.127244	0.108749	0.896778	ENSG00000267064.1	UXT-AS1	-0.0588937	-0.0116349	0.152852	0.873202
chr10_60140773_60141173	5.91236	4.67035	-1.24202	-1.04569	0.0205039	ENSG00000151150.21	ANK3	-0.329292	-0.558424	-0.702296	0.325887
chr11_36455772_36456172	6.39079	4.71892	-0.660321	-1.477	0.000292454	ENSG00000135362.13	PRR5L	3.88119	2.98041	-1.01356	0.0108452
chr1_109075860_109076260	7.18534	6.86523	-0.320114	-0.109639	0.898125	ENSG00000197780.9	TAF13	5.50391	5.7491	0.287647	0.202909
chr1_244652709_244653109	9.50827	9.07488	-0.433388	-0.250504	0.799782	ENSG00000121644.18	DESI2	3.96373	4.29437	0.333611	0.0817204
chr15_77900380_77900780	2.60774	2.68275	0.0750131	0.280404	0.887473	ENSG00000260139.6	CSPG4P13	-1.62166	-2.87041	-3.33502	0.0108469
chr5_17355928_17356328	4.54305	4.44387	-0.0991754	0.119611	0.904524	ENSG00000223361.5	FTH1P10	2.81045	3.11902	0.344391	0.278552
chr11_33723201_33723601	7.2964	6.52742	-0.434887	-0.556606	0.303621	ENSG00000085063.15	CD59	7.95616	7.71122	-0.303102	0.061097
chr3_196338403_196338803	5.82719	5.74928	0.164987	0.139393	0.86025	ENSG00000145107.15	TM4SF19	3.13028	3.73579	0.575402	0.0769913
chr12_95217437_95217837	7.9177	7.92065	0.00294178	0.191711	0.819602	ENSG00000028203.17	VEZT	4.66181	4.35193	-0.210509	0.261513
chr3_119676982_119677382	7.02802	6.67792	-0.350099	-0.14494	0.857489	ENSG00000138495.6	COX17	5.72999	5.70291	-0.0180765	0.943114
chr16_2223220_2223620	6.79218	7.33102	0.538835	0.747145	0.133675	ENSG00000167967.15	E4F1	5.26847	5.54948	0.312813	0.08896
chr20_37527721_37528121	4.95815	4.96626	0.00810928	0.23454	0.772741	ENSG00000166619.13	BLCAP	5.18693	5.38032	0.230215	0.21581
chr4_108650230_108650630	6.53251	6.03776	-0.494743	-0.298087	0.637852	ENSG00000198856.12	OSTC	6.53018	6.48946	-0.0253953	0.898498
chr2_47335047_47335447	4.53373	4.79978	0.266057	0.512062	0.447224	ENSG00000236824.2	BCYRN1	7.46703	8.84949	1.58576	0.00291999
chr11_73761023_73761423	6.91661	7.25763	0.341027	0.532005	0.336265	ENSG00000175582.19	RAB6A	5.45816	5.06798	-0.326765	0.0674332
chr10_100987291_100987691	4.68612	4.9233	0.237187	0.432815	0.522963	ENSG00000055950.16	MRPL43	6.74345	7.32927	0.642385	0.00872317
chr5_38556377_38556777	7.42968	7.34306	-0.0107523	0.110912	0.899591	ENSG00000113594.9	LIFR	4.5927	4.85196	0.488976	0.0803848
chr18_73264245_73264645	5.1736	4.91795	-0.255653	-0.0794622	0.933335	ENSG00000263711.5	AC079062.1	1.78621	2.32685	0.103068	0.776767
chr3_14178534_14178934	6.85652	7.07235	-0.0854776	0.404271	0.503584	ENSG00000154767.14	XPC	4.56706	4.30164	-0.292194	0.106269
chr19_38930645_38931045	5.2525	5.56651	0.314012	0.505387	0.364391	ENSG00000104835.14	SARS2	4.59499	4.81587	0.245926	0.2014
chr6_150069008_150069408	6.94563	6.65868	-0.281072	-0.0709327	0.936716	ENSG00000131019.10	ULBP3	1.43997	1.45295	0.0812807	0.888898
chr12_49322901_49323301	7.04691	7.44514	0.398228	0.594632	0.271913	ENSG00000135451.12	TROAP	7.19686	6.72961	-0.360609	0.0599877
chr13_21603630_21604030	7.12562	6.72286	-0.402769	-0.20261	0.786812	ENSG00000165487.13	MICU2	2.96993	3.68252	0.753926	0.0279956
chr6_110981813_110982213	5.9208	5.97599	0.0551919	0.229068	0.73568	ENSG00000197498.12	RPF2	4.71815	5.44624	0.632082	0.00955614
chr8_55773317_55773717	8.0419	7.21031	-0.831588	-0.618191	0.27087	ENSG00000137574.10	TGS1	3.44568	3.50217	0.0624471	0.77669
chr2_240025325_240025725	5.06868	5.26217	0.193494	0.38983	0.548329	ENSG00000130414.11	NDUFA10	6.51436	7.16701	0.633672	0.00656511
chr4_94451694_94452094	7.05075	6.68868	-0.565462	-0.157556	0.842976	ENSG00000163110.14	PDLIM5	4.95403	4.95979	-0.166101	0.380673
chr1_244451898_244452298	9.58218	8.98542	-0.596758	-0.405651	0.637074	ENSG00000035687.9	ADSS	4.95318	5.49665	0.561589	0.0136771
chr1_19882139_19882539	5.29073	5.17369	-0.117039	0.0606115	0.949007	ENSG00000169914.5	OTUD3	0.679536	1.79435	1.30917	0.00481441
chr6_96521587_96521987	7.65511	7.20856	-0.446547	-0.263676	0.718454	ENSG00000014123.9	UFL1	2.14288	2.2163	0.192198	0.439011
chr1_43389697_43390097	5.79334	5.83808	0.0447372	0.215446	0.757198	ENSG00000159479.16	MED8	5.93722	6.29141	0.398087	0.0360049
chr6_33410197_33410597	6.20098	6.40249	0.201513	0.388237	0.502066	ENSG00000112511.17	PHF1	4.162	4.55685	0.34041	0.107236
chr12_19439351_19439751	7.07089	6.88071	-0.361138	0.0139729	0.988706	ENSG00000139154.14	AEBP2	4.67038	4.721	0.0400909	0.844834
chr1_19251485_19251885	4.57382	4.84205	0.268227	0.488949	0.464933	ENSG00000053372.4	MRTO4	5.80297	6.39257	0.603892	0.00750867
chr3_97764331_97764731	7.49232	6.53011	-0.962212	-0.7625	0.119926	ENSG00000113966.9	ARL6	0.671505	0.641546	-0.15229	0.74608
chr8_23287884_23288284	4.67908	4.75043	0.0713563	0.245259	0.764325	ENSG00000104679.10	R3HCC1	4.57574	5.3809	0.911548	0.00281708
chr17_76872491_76872891	6.06766	5.5926	-0.0767333	-0.262311	0.696536	ENSG00000167889.12	MGAT5B	4.55932	4.47474	-0.130319	0.491972
chr1_28328831_28329231	4.20139	4.46414	0.262741	0.415561	0.577537	ENSG00000130772.13	MED18	3.92735	4.66454	0.826456	0.00850761
chr4_183659033_183659433	6.95934	6.70205	-0.257285	-0.0542487	0.953362	ENSG00000168538.15	TRAPPC11	2.76486	2.76865	-0.106149	0.623483
chr17_7307146_7307546	6.33069	6.83917	0.508484	0.712467	0.140808	ENSG00000132507.17	EIF5A	10.22	11.0485	0.843054	0.00174045
chr20_6122916_6123316	6.86831	6.3056	-0.562706	-0.351571	0.571927	ENSG00000101311.15	FERMT1	3.31375	2.55872	-0.826866	0.00554393
chr3_184185845_184186245	6.96354	6.75788	-0.205662	-0.00780781	0.993201	ENSG00000161204.11	ABCF3	5.76756	6.58193	0.790019	0.00303743
chr2_240560960_240561360	6.37885	6.71798	0.339129	0.548858	0.294956	ENSG00000144504.15	ANKMY1	2.78927	2.14552	-0.109549	0.725298
chr1_175192773_175193173	7.95217	6.90103	-1.62976	-0.845647	0.0909564	ENSG00000235750.9	KIAA0040	3.24728	1.52703	-1.74227	0.000783971
chr11_73787930_73788330	5.88209	6.30356	0.421472	0.62609	0.199639	ENSG00000175581.13	MRPL48	5.67559	6.10656	0.316001	0.154284
chr7_39623331_39623731	7.88699	6.94845	-0.938534	-0.743167	0.150385	ENSG00000006451.7	RALA	4.8119	5.59714	0.53229	0.0238105
chr20_50190618_50191018	5.95982	6.07091	0.111091	0.328341	0.597017	ENSG00000172216.5	CEBPB	6.20469	6.03186	-0.158726	0.459238
chr3_196568440_196568840	6.26481	6.21074	-0.0540768	0.115145	0.88466	ENSG00000174013.7	FBXO45	2.94504	3.89936	0.917245	0.00289145
chr17_39636902_39637302	4.81349	5.01154	0.198057	0.393958	0.565736	ENSG00000131748.15	STARD3	5.20389	5.46071	0.367368	0.0575234
chr21_38661009_38661409	4.66928	5.06946	0.400181	0.609226	0.303589	ENSG00000157554.18	ERG	2.93107	2.4906	-0.220971	0.328486
chr12_122078472_122078872	5.97102	5.87894	-0.399487	0.0928219	0.910578	ENSG00000175727.13	MLXIP	4.50952	3.86075	-0.568949	0.0166576
chr1_36397755_36398155	5.76406	5.88881	0.124751	0.295823	0.637852	ENSG00000181817.5	LSM10	6.18928	6.76124	0.587514	0.0117249
chr6_28923811_28924211	6.84172	6.19392	-0.647798	-0.446171	0.427541	ENSG00000204713.10	TRIM27	5.78918	5.82877	0.0102386	0.955144
chr1_1919275_1919675	5.95833	6.54295	0.584622	0.768731	0.0924662	ENSG00000178821.12	TMEM52	1.04948	1.24013	0.270778	0.725564
chr14_67819579_67819979	4.62919	5.01163	0.293276	0.576917	0.340141	ENSG00000182185.18	RAD51B	1.91307	1.61372	-0.33229	0.433592
chr1_23800612_23801012	4.68988	4.96139	0.129058	0.44567	0.49909	ENSG00000117308.14	GALE	5.48669	5.06969	-0.476422	0.0262885
chr18_26548421_26548821	5.96512	5.62991	-0.393944	-0.101556	0.904203	ENSG00000134504.13	KCTD1	4.10834	3.10525	-0.828112	0.00819678
chr1_74745401_74745801	4.09893	4.97032	-0.0706731	1.02667	0.049236	ENSG00000162623.15	TYW3	5.7101	5.49386	-0.573989	0.0121336
chr14_31026352_31026752	6.79984	6.67312	-0.126721	0.0826997	0.924604	ENSG00000100478.14	AP4S1	1.0667	-0.178118	-1.26639	0.0168538
chr19_35309441_35309841	6.03059	4.38595	-1.64464	-1.43139	0.00101283	ENSG00000105695.14	MAG	3.83096	1.17031	-2.20936	0.0011412
chr15_42495387_42495787	5.86851	5.4521	-0.239862	-0.23326	0.736203	ENSG00000092531.9	SNAP23	4.12316	3.74622	-0.428273	0.0581974
chr7_76626969_76627369	4.54931	4.83798	-0.104357	0.497965	0.452621	ENSG00000146707.14	POMZP3	2.28523	2.08339	-0.153143	0.663101
chr10_73110871_73111271	4.2246	4.74395	0.350384	0.706212	0.238426	ENSG00000166321.13	NUDT13	0.902295	1.44322	0.457184	0.252138
chr12_104588389_104588789	5.95975	5.23951	-0.557383	-0.467792	0.425982	ENSG00000171310.10	CHST11	2.88319	3.42703	-0.199674	0.366225
chr1_52904836_52905236	3.19596	3.78776	0.195917	0.785496	0.346639	ENSG00000121310.16	ECHDC2	3.57291	3.41207	-0.376971	0.104981
chr12_110403473_110403873	4.62718	4.74567	-0.143587	0.312983	0.684522	ENSG00000196510.12	ANAPC7	6.05515	6.05762	-0.0528821	0.755054
chr12_120710280_120710680	5.09136	5.16707	0.0757052	0.267436	0.717689	ENSG00000175970.10	UNC119B	4.51817	4.85685	0.347672	0.0564359
chr15_66504879_66505279	5.15213	5.168	0.0158738	0.234328	0.76261	ENSG00000174442.11	ZWILCH	4.44276	3.43846	-0.814705	0.00410833
chr11_78079651_78080051	4.8109	4.97902	0.168117	0.3556	0.615173	ENSG00000151366.12	NDUFC2	8.25682	8.58519	0.355913	0.0576415
chr10_5684450_5684850	6.7109	6.39354	-0.317359	-0.113397	0.889945	ENSG00000108021.20	FAM208B	3.73379	3.30969	-0.0525311	0.916011
chr2_68971678_68972078	7.13028	6.28165	-0.84863	-0.591152	0.27415	ENSG00000169605.5	GKN1	0.892524	0.660733	-0.156034	0.82842
chr3_52705856_52706256	6.05702	6.43424	0.377217	0.592695	0.237528	ENSG00000016864.18	GLT8D1	5.47403	5.52175	0.151913	0.403232
chr20_36951559_36951959	5.09683	6.01344	0.916602	1.13966	0.00853574	ENSG00000101347.9	SAMHD1	3.27338	3.61227	0.334838	0.104088
chr3_57165188_57165588	5.54299	5.30103	0.0120165	-0.0539247	0.954022	ENSG00000144730.17	IL17RD	0.817993	0.0338194	-0.674999	0.038842
chr11_128507142_128507542	7.01928	6.34226	-1.39631	-0.459991	0.419357	ENSG00000134954.14	ETS1	3.05786	2.43784	-0.60319	0.0214436
chr9_131531166_131531566	5.60753	5.47389	-0.133639	0.0368534	0.968578	ENSG00000130717.12	UCK1	4.404	4.47379	0.0424436	0.838366
chr16_4476152_4476552	6.43933	6.79738	0.39876	0.555564	0.286726	ENSG00000103415.11	HMOX2	6.5317	6.86748	0.418405	0.0349813
chr19_18152876_18153276	6.40347	6.96085	0.63265	0.752362	0.113089	ENSG00000105647.16	PIK3R2	5.91402	5.8587	-0.0542678	0.729699
chrX_117972692_117973092	6.00706	5.2248	-0.296944	-0.555729	0.297822	ENSG00000003096.14	KLHL13	3.9514	3.96611	0.0571846	0.767122
chr3_10023716_10024116	4.83101	4.46058	-0.370422	-0.208057	0.809636	ENSG00000186162.10	CIDECP	2.37182	3.22132	0.789937	0.0351727
chr22_50525474_50525874	6.20486	6.02548	-0.179371	-0.00330824	0.997045	ENSG00000130489.14	SCO2	5.6537	5.6149	-0.0175378	0.936011
chr19_17841815_17842215	6.29855	6.32225	0.0236968	0.237712	0.730174	ENSG00000105639.18	JAK3	0.179479	-1.14668	-1.54226	0.0107333
chr1_244048235_244048635	9.13188	8.61957	-0.512312	-0.316401	0.712829	ENSG00000179456.10	ZBTB18	0.551161	1.0681	0.559957	0.0984422
chr9_105694335_105694735	7.12002	6.95219	-0.332326	0.0208473	0.983528	ENSG00000095209.11	TMEM38B	4.05675	4.57789	0.501452	0.0254015
chr17_64662097_64662497	5.75778	5.98188	0.224107	0.403232	0.478487	ENSG00000108854.15	SMURF2	3.46875	3.73013	0.238618	0.235483
chr1_248750269_248750669	4.40516	3.45256	-0.9526	-0.797929	0.234027	ENSG00000259823.5	LYPD8	0.397177	0.634876	0.270259	0.633764
chr17_75896537_75896937	5.36933	5.75952	0.39019	0.583144	0.256606	ENSG00000141569.11	TRIM65	5.19711	5.03603	-0.179517	0.336518
chr10_116742461_116742861	7.91176	7.47494	-0.436815	-0.255004	0.737876	ENSG00000165868.14	HSPA12A	2.49229	1.86171	-0.629996	0.0340787
chr2_162343842_162344242	7.52619	6.91196	-0.614229	-0.427836	0.483267	ENSG00000115271.10	GCA	2.15837	2.04881	0.0721231	0.880936
chr6_70413227_70413627	7.96371	7.45938	-0.504333	-0.306661	0.670475	ENSG00000082269.16	FAM135A	1.26689	1.28916	0.121833	0.794963
chr4_499001_499401	5.45796	5.69768	0.426222	0.442521	0.441539	ENSG00000174227.15	PIGG	3.90301	4.04769	0.203306	0.311042
chr9_125707065_125707465	6.44826	6.51816	-0.0443979	0.254562	0.706834	ENSG00000119487.16	MAPKAP1	6.03494	6.4312	-0.010143	0.958659
chr4_17810640_17811040	7.9133	7.61739	-0.574025	-0.0868354	0.926358	ENSG00000109805.9	NCAPG	3.99635	4.39021	0.394654	0.0463916
chr8_98117020_98117420	6.90996	6.88778	-0.0221799	0.185109	0.809427	ENSG00000104356.10	POP1	4.79896	5.32462	0.578217	0.0126336
chr16_89508148_89508548	6.06668	5.91459	-0.152088	0.0470627	0.958174	ENSG00000197912.15	SPG7	5.46265	5.66102	0.152358	0.370804
chr3_197031424_197031824	6.6131	6.38564	-0.071747	-0.00666327	0.994227	ENSG00000163975.11	MELTF	4.76919	3.2532	-1.4004	0.000783971
chr17_39663695_39664095	4.37783	4.34593	-0.0318963	0.122326	0.902288	ENSG00000173991.5	TCAP	-1.3542	-1.2056	0.231569	0.766864
chr12_70543456_70543856	4.94711	4.2154	-0.867793	-0.497491	0.470188	ENSG00000127329.15	PTPRB	-1.243	-1.32918	-0.581434	0.272728
chr15_45587086_45587486	6.49289	5.73805	-0.754837	-0.54894	0.282982	ENSG00000104164.10	BLOC1S6	2.8207	2.35726	-0.428884	0.112995
chr17_75261473_75261873	5.70276	5.96457	0.261809	0.472812	0.386079	ENSG00000125445.10	MRPS7	7.7585	8.08187	0.321325	0.0527126
chrX_47190555_47190955	5.72076	6.09317	0.186242	0.584707	0.245306	ENSG00000130985.16	UBA1	8.11508	7.86819	-0.239913	0.116265
chr3_172750426_172750826	8.47568	8.25636	-0.108747	-0.024713	0.982832	ENSG00000114346.13	ECT2	4.47365	4.53087	0.140646	0.446357
chr20_62861857_62862257	4.57955	5.34312	0.763568	0.91925	0.0622251	ENSG00000101190.12	TCFL5	3.02453	2.49395	-0.530443	0.0497486
chrX_19343618_19344018	7.34302	7.07711	-0.265914	-0.0457101	0.962442	ENSG00000131828.13	PDHA1	9.47801	9.76685	0.198032	0.24246
chr8_27311230_27311630	7.50331	7.05266	-0.450649	-0.23342	0.756678	ENSG00000104228.12	TRIM35	3.06559	3.37861	0.331328	0.174651
chr4_23889850_23890250	5.62704	5.13899	-0.48805	-0.287989	0.674863	ENSG00000109819.8	PPARGC1A	1.16354	-0.0237587	-1.17743	0.00647742
chr6_148746713_148747113	6.21563	5.82305	-0.392581	-0.228604	0.735399	ENSG00000111962.7	UST	3.04271	2.87869	-0.47018	0.0860189
chr1_165768736_165769136	8.11176	7.74237	-0.50889	-0.174766	0.839704	ENSG00000143183.16	TMCO1	7.03744	6.78768	-0.0716138	0.805742
chr15_74540839_74541239	6.13828	6.22632	-0.21144	0.292602	0.646644	ENSG00000179361.17	ARID3B	2.66037	3.52009	0.913194	0.00908206
chr17_42154893_42155293	6.08839	6.64445	0.556054	0.74303	0.109052	ENSG00000108774.14	RAB5C	7.73902	7.43528	-0.297736	0.065321
chr11_34105383_34105783	6.52684	6.42736	-0.0994813	0.0971494	0.907919	ENSG00000135372.8	NAT10	5.74898	5.5265	-0.215095	0.23413
chr9_137156925_137157325	4.6315	4.66027	0.028767	0.219222	0.797967	ENSG00000176884.14	GRIN1	-1.85988	-2.8365	-1.6953	0.0716576
chr7_5822853_5823253	6.14182	6.16335	0.0215334	0.21355	0.759843	ENSG00000235944.8	ZNF815P	1.47181	1.18448	-0.48523	0.262717
chr2_72887189_72887589	5.96997	6.18611	0.216138	0.451171	0.423161	ENSG00000116096.5	SPR	5.76867	6.65822	0.906197	0.00217441
chr19_11339457_11339857	4.61342	4.26595	-0.347468	-0.165562	0.860763	ENSG00000105514.7	RAB3D	2.44274	1.59095	-0.661895	0.0265808
chr17_75240441_75240841	4.27277	5.07555	0.415373	0.993375	0.0552917	ENSG00000125447.17	GGA3	4.60488	4.30102	-0.288415	0.128587
chr19_32345350_32345750	4.83832	5.04086	-0.205937	0.371489	0.587179	ENSG00000168813.16	ZNF507	2.07479	2.07343	0.0204101	0.944079
chr17_36591592_36591992	5.25682	5.61188	0.355062	0.600028	0.271652	ENSG00000278535.4	DHRS11	4.07007	4.80214	0.674988	0.0253464
chr18_21612090_21612490	5.49509	5.42382	-0.0712744	0.128747	0.876201	ENSG00000167088.10	SNRPD1	7.09795	7.61445	0.414739	0.0300334
chr7_66493436_66493836	6.81271	6.6848	-0.127905	0.0642858	0.942995	ENSG00000179406.7	LINC00174	0.999838	1.4231	0.765167	0.0429089
chr1_235073537_235073937	6.71943	5.35531	-1.36413	-1.14096	0.00654185	ENSG00000280587.1	LINC01348	-1.25523	-2.39793	-1.86	0.0428409
chr17_43900462_43900862	4.20017	4.17447	0.0869248	0.114123	0.913215	ENSG00000108852.14	MPP2	2.65461	2.25961	-0.356073	0.146182
chr17_3636188_3636588	6.67375	6.95091	0.277162	0.484777	0.386819	ENSG00000040531.14	CTNS	3.74027	4.364	0.713	0.00750264
chr10_73625803_73626203	5.74356	5.91732	0.108879	0.367304	0.535491	ENSG00000166348.18	USP54	3.50926	2.87347	-0.634443	0.0157324
chr1_24413555_24413955	4.57189	4.37987	-0.408053	-0.00182249	0.998857	ENSG00000001460.17	STPG1	1.94556	2.16311	-0.272151	0.376092
chr13_99981040_99981440	7.42611	7.05594	-0.370172	-0.153767	0.853247	ENSG00000043355.11	ZIC2	3.12682	3.3459	0.277482	0.21671
chr10_125823160_125823560	5.21341	5.09003	-0.123384	0.0906821	0.922264	ENSG00000107949.16	BCCIP	5.70858	6.36744	0.801522	0.00348025
chrX_53093814_53094214	6.95945	6.92778	0.0105742	0.186264	0.809735	ENSG00000232593.7	KANTR	1.07664	1.13807	0.11115	0.758448
chr19_55207093_55207493	4.16868	4.17081	-0.138443	0.186761	0.84874	ENSG00000080031.9	PTPRH	2.17676	2.22147	0.334015	0.231664
chr9_86354310_86354710	7.07185	7.06143	-0.0104144	0.174194	0.823754	ENSG00000083223.17	TUT7	2.16831	1.84982	-0.504793	0.0730472
chr15_99733337_99733737	8.1454	7.82187	-0.32353	-0.136035	0.880989	ENSG00000183060.15	LYSMD4	2.07281	2.41028	0.245559	0.397088
chr12_79690969_79691369	8.03336	7.65285	-0.894066	-0.196352	0.814086	ENSG00000177425.10	PAWR	4.6434	5.77364	0.754818	0.00984659
chr20_63574143_63574543	4.53057	4.0825	-0.44807	-0.260869	0.76596	ENSG00000130589.16	HELZ2	3.44221	3.80154	0.34408	0.0716576
chr10_100009734_100010134	5.98862	6.06224	-0.142141	0.233616	0.728056	ENSG00000107554.16	DNMBP	2.5952	2.10726	-0.692352	0.0153246
chr16_9160103_9160503	3.96264	3.69488	-0.267761	-0.0944396	0.93805	ENSG00000220793.5	RPL21P119	-1.2782	0.177959	0.780835	0.539694
chr19_7903512_7903912	5.84074	6.31488	0.474144	0.651567	0.172138	ENSG00000076984.17	MAP2K7	4.78981	4.30247	-0.483029	0.0213404
chr19_34428138_34428538	5.2525	4.82912	-0.423383	-0.194995	0.815455	ENSG00000126261.12	UBA2	6.50859	6.87658	0.569762	0.00777506
chr16_67660673_67661073	6.25111	6.33744	0.0863298	0.287181	0.655122	ENSG00000102977.14	ACD	5.24233	5.19962	-0.0170195	0.937591
chr10_133393941_133394341	6.21924	6.09252	-0.126723	0.0771689	0.927135	ENSG00000148824.18	MTG1	5.10092	5.53642	0.454489	0.0301504
chr7_149624542_149624942	7.61165	7.04176	-0.569894	-0.368102	0.576232	ENSG00000133624.13	ZNF767P	1.55371	2.50678	0.89719	0.0155481
chr22_43143131_43143531	4.51612	4.75675	0.240626	0.447985	0.52049	ENSG00000100294.12	MCAT	5.08184	5.70515	0.608904	0.0103036
chr12_56752220_56752620	5.85446	5.78729	-0.0671638	0.148282	0.849134	ENSG00000025423.11	HSD17B6	3.17287	2.60641	-0.469246	0.18981
chr5_168579565_168579965	8.72326	8.32409	-0.399167	-0.192177	0.834444	ENSG00000120137.6	PANK3	3.605	5.25068	0.653516	0.00977185
chr15_45402102_45402502	5.97115	5.92078	-0.0503657	0.158986	0.834329	ENSG00000171763.18	SPATA5L1	3.48372	4.22527	0.553906	0.0225554
chr7_65872913_65873313	6.75761	6.67388	-0.0837307	0.0963273	0.909978	ENSG00000196715.6	VKORC1L1	4.60845	4.65156	-0.234092	0.19177
chr1_31576141_31576541	4.89798	4.70784	-0.786223	0.0370947	0.972547	ENSG00000142910.15	TINAGL1	5.88858	4.16526	-1.74713	0.000503891
chr16_2603178_2603578	5.30255	5.4575	0.154941	0.34908	0.587754	ENSG00000215154.6	AC141586.1	2.14428	1.35131	-0.863396	0.0218652
chr14_70907253_70907653	6.23849	6.11887	-0.687746	0.0936021	0.910734	ENSG00000100731.15	PCNX1	3.49264	3.28429	-0.652224	0.0162286
chr2_27050793_27051193	6.80326	7.03026	0.227	0.483836	0.414943	ENSG00000084693.15	AGBL5	5.24261	5.17463	-0.0561686	0.777762
chr5_892633_893033	7.90069	7.71732	-0.142263	0.0115462	0.990994	ENSG00000028310.17	BRD9	6.11636	6.28458	0.154726	0.327997
chr7_151046920_151047320	4.71385	3.53291	-1.18094	-1.00167	0.0886311	ENSG00000213199.7	ASIC3	2.12281	1.66624	-0.466961	0.245148
chr19_11344439_11344839	4.55838	4.4145	-0.143884	0.0804937	0.939384	ENSG00000183401.11	CCDC159	1.2505	1.47818	-0.0465577	0.946458
chr7_138785852_138786252	5.90069	5.41483	-0.485856	-0.234617	0.748756	ENSG00000105929.16	ATP6V0A4	1.65173	0.116208	-1.53266	0.00424947
chr9_125143410_125143810	6.63407	6.69092	0.056856	0.230284	0.741899	ENSG00000173611.17	SCAI	1.0041	1.5441	0.406737	0.226703
chr19_46203445_46203845	4.46275	4.17843	-0.284328	-0.03573	0.975657	ENSG00000268460.1	AC006262.1	0.463986	-0.402074	-1.0214	0.085761
chr9_96449869_96450269	6.80496	6.61843	-0.186529	0.00259079	0.997664	ENSG00000130956.13	HABP4	3.15225	3.3688	0.228704	0.309526
chr3_120349263_120349663	7.94794	7.78464	-0.163299	0.039751	0.96914	ENSG00000163428.3	LRRC58	2.90256	2.81992	-0.076099	0.68066
chr2_32165577_32165977	7.86326	7.33321	-0.530049	-0.344826	0.619456	ENSG00000152683.14	SLC30A6	4.00046	3.6013	-0.174901	0.349152
chr7_45092394_45092794	4.79429	3.33252	-1.23299	-1.23395	0.0298946	ENSG00000136274.8	NACAD	-2.30764	-2.69645	-0.861565	0.295229
chr1_243254330_243254730	7.71842	7.04343	-0.107039	-0.475779	0.426062	ENSG00000143702.15	CEP170	3.61685	3.81525	0.174661	0.425186
chr7_44082466_44082866	7.39491	7.24147	-0.153447	0.0370784	0.969538	ENSG00000122678.16	POLM	3.20312	3.0928	-0.0789807	0.760028
chr6_31197751_31198151	5.50657	5.80965	0.343822	0.505736	0.347881	ENSG00000206344.7	HCG27	-0.744215	-1.03125	-0.557561	0.501458
chr21_43864911_43865311	3.232	3.47096	0.238961	0.42124	0.712984	ENSG00000160216.18	AGPAT3	5.03397	4.8953	-0.174735	0.282776
chr20_35954271_35954671	6.8529	7.12812	0.275213	0.498098	0.381146	ENSG00000149646.12	CNBD2	2.00063	2.4177	0.445817	0.391956
chr11_66052010_66052410	6.4251	7.14134	0.716234	0.931741	0.0405116	ENSG00000087365.15	SF3B2	7.54811	7.87551	0.328745	0.0491662
chr2_153478646_153479046	7.53173	6.90036	-0.631367	-0.453377	0.447075	ENSG00000177519.3	RPRM	4.05155	2.88449	-1.16705	0.0045685
chr1_154220491_154220891	6.83034	7.1214	0.291062	0.478602	0.399592	ENSG00000143569.18	UBAP2L	7.70575	8.04363	0.453502	0.0205937
chr19_55146691_55147091	4.20885	3.70081	-0.188088	-0.343141	0.702364	ENSG00000105048.16	TNNT1	5.59003	5.15765	-0.528585	0.0375366
chr6_36441358_36441758	5.89882	6.0737	0.319137	0.38227	0.513059	ENSG00000112078.13	KCTD20	5.16736	4.88215	-0.223111	0.230093
chr9_133417959_133418359	5.15659	4.87698	-0.279615	-0.0496855	0.961217	ENSG00000148300.11	REXO4	5.22003	5.30605	0.0854521	0.625767
chr12_68686666_68687066	7.13958	6.91088	-0.228701	-0.0415582	0.965006	ENSG00000111581.9	NUP107	5.34917	5.21603	0.0741691	0.679789
chr10_47991762_47992162	4.39217	3.80747	-0.5847	-0.3609	0.670454	ENSG00000276850.4	AC245041.2	3.22399	3.28416	0.817084	0.0420632
chr6_8435338_8435738	7.5666	6.99965	-0.566956	-0.372384	0.563419	ENSG00000124786.11	SLC35B3	3.07173	3.07314	0.00180331	0.994548
chr19_19385447_19385847	7.74312	7.92995	0.097316	0.375465	0.585	ENSG00000167491.17	GATAD2A	6.35557	5.90528	-0.264319	0.153585
chr2_27622847_27623247	3.59842	3.07567	-0.52275	-0.263811	0.844159	ENSG00000198522.13	GPN1	5.64033	6.08365	0.414225	0.0334224
chr12_27780109_27780509	7.11384	6.17153	-0.942311	-0.735646	0.126452	ENSG00000087448.10	KLHL42	3.16579	3.67768	0.110649	0.624003
chr2_65130062_65130462	7.69627	7.64971	-0.0465594	0.153346	0.858707	ENSG00000138069.17	RAB1A	6.15335	6.05693	-0.217191	0.193724
chr15_34988343_34988743	5.93341	5.43283	-0.500581	-0.312545	0.621305	ENSG00000198146.4	ZNF770	2.13511	1.74199	-0.81923	0.0275425
chr2_54723299_54723699	8.5906	8.19301	-1.22366	-0.192746	0.830339	ENSG00000214595.11	EML6	1.13302	1.91456	0.0459682	0.88364
chr1_9234561_9234961	5.07786	5.54998	0.472114	0.599842	0.247687	ENSG00000049239.12	H6PD	2.25812	1.44845	-0.734363	0.0110051
chr19_9834989_9835389	6.54247	6.97549	0.433021	0.620901	0.221348	ENSG00000127445.13	PIN1	6.38508	6.16577	-0.165844	0.370962
chr3_113838642_113839042	6.65113	5.93845	-0.157575	-0.519699	0.318223	ENSG00000178075.19	GRAMD1C	0.539032	0.417315	-0.242713	0.546319
chr3_63911841_63912241	7.19647	6.66685	-0.529622	-0.324413	0.619119	ENSG00000163635.18	ATXN7	2.32269	1.72262	-0.366032	0.329492
chr5_472824_473224	6.56368	6.95753	0.393851	0.535977	0.312868	ENSG00000188242.4	PP7080	5.17316	4.3387	-0.72114	0.031018
chr3_101849233_101849633	8.18102	7.69833	-0.482686	-0.280612	0.713703	ENSG00000144802.11	NFKBIZ	0.995151	-0.149159	-0.623364	0.143493
chr1_1658980_1659380	4.65311	4.80027	0.147164	0.350119	0.635345	ENSG00000248333.8	CDK11B	4.12758	4.63711	0.497466	0.0274287
chr5_55233560_55233960	6.9032	6.87416	-0.0290336	0.19989	0.79335	ENSG00000152669.8	CCNO	3.77687	3.91525	0.165134	0.466489
chr14_80941602_80942002	7.59551	7.10736	-0.0867813	-0.293799	0.674863	ENSG00000100629.16	CEP128	0.494097	0.183853	-0.466387	0.208927
chr12_53938401_53938801	7.14673	7.03825	-0.10848	0.114376	0.894542	ENSG00000123364.4	HOXC13	4.04474	3.75961	-0.27467	0.195954
chr13_51583891_51584291	7.34557	7.37008	0.0245115	0.224007	0.768738	ENSG00000139668.8	WDFY2	1.92419	1.60005	-0.179561	0.383442
chr1_202341834_202342234	7.04777	7.0495	0.00172411	0.212658	0.777169	ENSG00000077152.10	UBE2T	7.00851	6.94798	-0.0463604	0.805
chr9_85940776_85941176	7.51318	7.66733	0.154152	0.359378	0.595384	ENSG00000135040.15	NAA35	3.73589	4.92316	1.2235	0.00104962
chr5_40798125_40798525	8.71835	8.23102	-0.487334	-0.286246	0.729025	ENSG00000132356.11	PRKAA1	5.08427	5.86078	0.379933	0.0458407
chr9_137200660_137201060	6.70613	6.68619	-0.0199371	0.163501	0.832167	ENSG00000176058.12	TPRN	3.81095	3.75217	0.0132205	0.95449
chr19_18831677_18832077	4.8965	5.63562	0.739125	0.895075	0.0534019	ENSG00000005007.12	UPF1	5.38621	5.39639	0.0141209	0.937992
chr16_84699782_84700182	4.33108	4.41956	0.277198	0.280147	0.739016	ENSG00000103194.15	USP10	5.23718	5.58376	0.310969	0.0760854
chr17_51153258_51153658	6.26084	6.44042	0.179579	0.370912	0.529997	ENSG00000011052.21	NME1-NME2	5.1047	4.99605	-0.0866955	0.702569
chr7_140176913_140177313	7.00073	6.71755	-0.283179	-0.101005	0.905536	ENSG00000006459.10	KDM7A	0.549378	1.50885	0.691893	0.0284636
chr13_20525667_20526067	4.91057	4.53889	-0.37168	-0.172675	0.847437	ENSG00000165475.14	CRYL1	3.21915	1.78798	-1.43705	0.00463424
chr11_2929502_2929902	7.38348	7.1171	-0.884473	-0.059274	0.950135	ENSG00000181649.6	PHLDA2	7.30561	7.37714	0.0996681	0.582246
chr2_96536476_96536876	5.88122	6.02353	0.142305	0.364435	0.545996	ENSG00000196843.15	ARID5A	3.02377	3.25431	0.198861	0.48157
chr6_70667645_70668045	7.79308	7.15854	-0.634544	-0.428063	0.496714	ENSG00000112305.14	SMAP1	4.29965	4.42004	0.132586	0.486754
chr7_6448338_6448738	5.84789	6.02149	0.0671588	0.390208	0.505074	ENSG00000164535.14	DAGLB	4.06218	4.27744	0.26704	0.179876
chr11_17544272_17544672	5.34827	5.20956	-0.555037	0.0564588	0.952882	ENSG00000006611.15	USH1C	2.48029	0.72334	-2.04684	0.00463463
chr7_44986514_44986914	6.53878	6.61853	0.0797431	0.291904	0.658132	ENSG00000232956.8	SNHG15	5.64322	5.9704	0.127074	0.476593
chr20_341664_342064	5.03399	4.71806	-0.31593	-0.075054	0.941254	ENSG00000125841.12	NRSN2	-0.682936	-1.26184	-0.358615	0.685554
chr19_1438113_1438513	5.45849	6.19012	0.731626	0.942993	0.0300683	ENSG00000115268.9	RPS15	11.6877	11.7796	0.135398	0.365313
chr12_14884466_14884866	4.89129	4.16291	-0.728379	-0.502881	0.465069	ENSG00000111341.9	MGP	5.29356	3.99968	-1.45264	0.00166166
chr17_76027214_76027614	5.16627	5.67543	0.309702	0.731289	0.144451	ENSG00000167880.7	EVPL	3.4941	3.48528	-0.000376319	0.998676
chr2_64750925_64751325	8.34317	8.31366	-0.0320925	0.17052	0.851987	ENSG00000179833.4	SERTAD2	2.97868	3.0645	0.0277368	0.90016
chr2_207769809_207770209	7.89549	7.3788	-0.516688	-0.321636	0.649159	ENSG00000163251.3	FZD5	1.15452	0.780846	-0.376903	0.184255
chr8_144465227_144465627	6.30513	6.40666	0.206995	0.296185	0.641672	ENSG00000187954.12	CYHR1	4.90009	5.33988	0.526396	0.0282747
chr3_123884271_123884671	5.74643	5.54492	-0.0758228	-0.0549905	0.950494	ENSG00000065534.18	MYLK	0.763285	-0.714866	-1.46275	0.0066444
chr19_14032089_14032489	5.41271	5.48256	0.0698553	0.267195	0.700753	ENSG00000104998.3	IL27RA	5.55393	4.6085	-0.938411	0.00323487
chr4_113762478_113762878	6.08059	5.7686	-0.311986	-0.104967	0.897944	ENSG00000145349.16	CAMK2D	1.65867	0.892294	-0.601059	0.0632192
chr3_129399423_129399823	5.85055	5.96159	0.111033	0.307334	0.625402	ENSG00000251474.6	RPL32P3	3.06113	3.14397	-0.111422	0.66849
chr19_37906934_37907334	6.42216	6.29871	-0.00387545	0.0896598	0.914997	ENSG00000105738.10	SIPA1L3	4.11353	3.79993	-0.473983	0.0362076
chr16_636342_636742	6.02681	6.49727	0.470461	0.691901	0.150872	ENSG00000130731.15	METTL26	7.82638	7.57923	-0.371307	0.0502643
chr8_70401978_70402378	8.16229	7.51567	-0.3865	-0.446705	0.489872	ENSG00000140396.12	NCOA2	1.69264	0.855792	-0.789669	0.0300918
chr5_37379051_37379451	7.60889	7.30729	-0.942513	-0.0774741	0.934421	ENSG00000082068.8	WDR70	5.49876	5.94626	0.405241	0.059124
chr12_120581267_120581667	5.76286	5.8892	0.126335	0.310392	0.61902	ENSG00000167272.10	POP5	6.27039	6.69156	0.459258	0.0317416
chr14_20305621_20306021	4.76569	4.51501	-0.375489	-0.0354669	0.974337	ENSG00000136319.11	TTC5	1.58788	2.35801	0.548969	0.0887761
chr5_166377802_166378202	4.17537	3.24511	-0.930258	-0.777652	0.29609	ENSG00000229119.3	AC026403.1	3.53412	2.85382	-0.583899	0.368829
chr14_75069286_75069686	5.66504	5.8975	0.187684	0.409505	0.470562	ENSG00000119640.8	ACYP1	3.45193	3.90396	0.481375	0.207803
chr7_100874853_100875253	5.70755	5.9568	0.249249	0.446859	0.419051	ENSG00000087087.19	SRRT	6.49316	6.87113	0.42351	0.0303163
chrX_75273905_75274305	7.32385	6.82895	-0.494896	-0.280717	0.687099	ENSG00000094841.13	UPRT	2.79834	2.91165	0.195438	0.473921
chr15_88467268_88467668	6.23292	6.04029	-0.0985836	0.020338	0.983395	ENSG00000181991.15	MRPS11	6.14221	6.14246	0.0659056	0.725174
chr17_76072356_76072756	5.91168	6.23632	0.324642	0.517601	0.318113	ENSG00000167881.14	SRP68	6.71941	7.08188	0.386712	0.0275324
chr22_17084671_17085071	6.82408	6.63151	-0.192565	0.0290112	0.976136	ENSG00000177663.13	IL17RA	2.07208	2.07508	0.102666	0.619598
chr12_8032484_8032884	6.66822	6.10658	-0.410452	-0.368126	0.536664	ENSG00000065970.8	FOXJ2	3.4032	2.68865	-0.737886	0.00580279
chr12_47082759_47083159	5.70502	5.58728	-0.181082	0.124591	0.882204	ENSG00000139211.6	AMIGO2	2.77364	3.06178	0.291836	0.199948
chr7_74289250_74289650	4.71787	4.73527	0.0174025	0.206802	0.809648	ENSG00000106665.15	CLIP2	2.23649	1.29708	-0.733443	0.017793
chr4_85474865_85475265	7.01488	5.92597	-0.508168	-0.892976	0.0444881	ENSG00000138639.17	ARHGAP24	0.963986	0.365809	-0.67331	0.162449
chr6_131063137_131063537	6.96999	6.6851	-0.160441	-0.0808496	0.925985	ENSG00000079819.18	EPB41L2	4.50259	4.03606	-0.46832	0.0235782
chr16_4847184_4847584	6.59597	6.84876	0.252789	0.480619	0.395453	ENSG00000140632.16	GLYR1	5.98233	5.87486	0.00966763	0.96261
chr4_183098860_183099260	7.37292	6.87228	-0.500645	-0.277976	0.695396	ENSG00000251359.4	WWC2-AS2	-1.53548	-1.50116	0.0551665	0.948823
chr3_12288778_12289178	5.57729	5.96884	-0.120086	0.612637	0.22562	ENSG00000132170.20	PPARG	5.67423	6.01486	0.354074	0.0670222
chr1_228103194_228103594	6.16594	6.05446	-0.111478	0.0750206	0.929014	ENSG00000143793.12	C1orf35	5.02073	5.8043	0.740344	0.00523748
chr10_102394159_102394559	6.75291	6.81593	0.182869	0.258218	0.708647	ENSG00000077150.18	NFKB2	6.64657	7.19663	0.604907	0.00548793
chrX_45770126_45770526	5.44649	5.4403	-0.0605377	0.189681	0.803513	ENSG00000270069.1	MIR222HG	0.695306	0.801086	0.129568	0.810374
chr15_25438881_25439281	6.76717	6.35409	-0.413073	-0.184608	0.807525	ENSG00000114062.19	UBE3A	3.33459	3.8595	0.444757	0.0318927
chr2_25342377_25342777	6.07951	5.76634	0.136717	-0.13454	0.861858	ENSG00000119772.16	DNMT3A	1.55762	1.30653	-0.482972	0.0819255
chr22_23070005_23070405	5.51611	5.0343	-0.48181	-0.34817	0.588139	ENSG00000128266.8	GNAZ	-0.209252	-0.320015	-0.0649132	0.910901
chr17_45317043_45317443	6.56481	6.98073	0.0436734	0.604057	0.23739	ENSG00000006062.15	MAP3K14	3.42818	4.03954	0.568658	0.0279956
chr6_83430908_83431308	6.15188	5.14425	-1.00763	-0.791025	0.092099	ENSG00000065833.8	ME1	2.98386	3.07376	0.101095	0.646987
chr12_62260066_62260466	7.97922	7.31237	-0.130332	-0.475667	0.440235	ENSG00000135655.15	USP15	4.35528	4.33032	-0.0418682	0.844834
chr20_45910770_45911170	6.11058	6.62781	0.517224	0.697422	0.140089	ENSG00000100979.14	PLTP	0.592267	0.439539	-0.175772	0.769967
chr12_32896717_32897117	7.55254	6.7471	-0.526555	-0.59542	0.270164	ENSG00000057294.14	PKP2	3.0246	2.628	-0.642803	0.016755
chr12_57941450_57941850	7.59493	6.88916	-0.533559	-0.505978	0.377352	ENSG00000166896.8	ATP23	3.13537	3.30816	0.386774	0.293461
chr2_240435131_240435531	5.9806	5.96675	-0.0512514	0.182735	0.802801	ENSG00000063660.8	GPC1	4.48393	4.68115	0.279848	0.127234
chr20_34363037_34363437	5.46608	5.65371	0.187629	0.363409	0.549365	ENSG00000078747.14	ITCH	3.87422	4.4743	0.504995	0.0187402
chr6_1609637_1610037	7.29985	7.06469	-0.235154	-0.0759267	0.933972	ENSG00000054598.7	FOXC1	4.53443	4.59708	0.0683753	0.714122
chr12_49069807_49070207	6.79449	6.92685	0.132366	0.334858	0.601236	ENSG00000167550.10	RHEBL1	3.36669	4.14243	0.817033	0.0317841
chrX_40580672_40581072	6.83811	6.9232	0.0850902	0.303462	0.649901	ENSG00000182220.14	ATP6AP2	6.15405	5.93038	-0.0687783	0.69391
chr4_52712150_52712550	7.74117	7.4584	-0.282768	-0.0628095	0.94888	ENSG00000226950.6	DANCR	6.29216	5.74467	-0.527975	0.0212105
chr19_4518423_4518823	4.26583	4.51072	0.244889	0.431885	0.554911	ENSG00000167676.4	PLIN4	4.15897	3.57807	-0.581393	0.012477
chr12_49538766_49539166	4.44534	4.79679	0.683786	0.500407	0.445881	ENSG00000135519.7	KCNH3	-1.26308	-1.05702	0.200359	0.770637
chr12_32755675_32756075	7.59487	7.28909	-0.305777	-0.0842601	0.927135	ENSG00000139131.12	YARS2	5.58185	6.83104	1.07557	0.0011412
chr20_47501618_47502018	5.90026	5.99388	0.0936105	0.301442	0.634393	ENSG00000124151.18	NCOA3	3.70285	3.67233	0.0157137	0.948823
chr16_67841924_67842324	5.49589	5.82983	0.233336	0.533398	0.310844	ENSG00000102901.12	CENPT	4.79552	5.12803	0.329171	0.0842706
chr16_67649572_67649972	5.23605	5.09035	-0.145697	0.0348803	0.972053	ENSG00000159753.13	CARMIL2	2.67793	2.38474	-0.337491	0.220807
chr9_93058396_93058796	4.11766	4.62388	0.506215	0.711423	0.246454	ENSG00000157303.10	SUSD3	0.244771	-1.89793	-2.54573	0.014626
chr17_46361661_46362061	1.56849	1.80788	0.239391	0.333053	0.911414	ENSG00000228696.8	ARL17B	3.07362	3.24464	0.0825416	0.835907
chr19_45405074_45405474	5.25063	5.93568	0.685055	0.902754	0.0459445	ENSG00000104881.15	PPP1R13L	5.38798	5.43714	-0.10408	0.582246
chr22_50260945_50261345	4.04405	4.4265	0.382445	0.555134	0.421563	ENSG00000188130.13	MAPK12	4.82127	4.89001	0.0514834	0.807853
chr6_32190112_32190512	4.35943	4.3207	-0.0387265	0.131677	0.895026	ENSG00000204304.11	PBX2	5.7482	5.38447	-0.32215	0.0606861
chr6_125749367_125749767	7.65045	7.05195	-0.598493	-0.390723	0.542757	ENSG00000135547.8	HEY2	0.226456	-0.477418	-0.777461	0.121632
chr3_58526625_58527025	5.68891	5.04236	-0.389821	-0.408795	0.519017	ENSG00000168306.12	ACOX2	0.424719	1.52511	1.12656	0.0563628
chr19_38224061_38224461	5.81427	5.39366	-0.127938	-0.202822	0.784625	ENSG00000011332.19	DPF1	1.81118	2.19562	0.241946	0.454274
chr12_12611596_12611996	7.12702	6.85702	-0.269994	-0.086688	0.921414	ENSG00000111269.2	CREBL2	5.19136	4.29804	-0.890086	0.00301231
chr7_73822508_73822908	7.14526	6.46561	-0.821623	-0.4587	0.434554	ENSG00000189143.9	CLDN4	0.758865	-0.645796	-1.46536	0.0125063
chr10_11823162_11823562	5.08948	5.28134	0.191853	0.390005	0.547172	ENSG00000148426.12	PROSER2	5.36793	5.85262	0.339627	0.0844278
chr7_26200684_26201084	6.89656	7.18121	0.28465	0.487686	0.394531	ENSG00000122566.21	HNRNPA2B1	9.39219	9.76875	0.384965	0.0288373
chr17_40417836_40418236	5.52634	6.26186	0.735528	0.927733	0.0310654	ENSG00000131747.14	TOP2A	5.08682	4.5757	-0.486637	0.0155184
chr19_8343128_8343528	4.7615	5.38567	0.417309	0.768113	0.131015	ENSG00000186994.11	KANK3	-0.334434	-1.39194	-1.2485	0.0794488
chr3_14876981_14877381	5.71589	4.20812	-1.50777	-1.27978	0.00674755	ENSG00000154783.11	FGD5	-2.69041	-2.13824	0.740381	0.522091
chr5_140107700_140108100	6.90441	7.06256	0.0590836	0.355174	0.576021	ENSG00000185129.5	PURA	2.36219	2.68846	-0.0918803	0.72599
chr11_122422669_122423069	5.73596	5.23418	-0.459743	-0.265206	0.71217	ENSG00000255248.8	MIR100HG	1.70321	1.0095	-0.590276	0.237973
chr22_30592011_30592411	5.58896	6.00889	0.419927	0.620725	0.20763	ENSG00000100029.17	PES1	7.40735	8.06571	0.660305	0.00404324
chr2_101387214_101387614	6.2463	5.83726	-0.409039	-0.182915	0.806258	ENSG00000175874.9	CREG2	3.57885	3.35516	-0.462337	0.0909363
chr21_10342195_10342595	4.91301	4.50595	-0.407054	-0.195192	0.824707	ENSG00000277693.1	AP003900.1	0.394552	-0.763081	-1.32759	0.154997
chrX_78103921_78104321	8.07284	7.50646	-0.453592	-0.365623	0.595366	ENSG00000102144.14	PGK1	9.64858	9.20597	-0.36219	0.0337373
chr15_63600693_63601093	5.5904	6.23257	0.642172	0.840459	0.0589904	ENSG00000259248.6	USP3-AS1	0.428791	0.163441	0.0644751	0.93301
chr3_142888383_142888783	6.79143	6.61701	-0.532626	0.0231172	0.981463	ENSG00000163710.8	PCOLCE2	5.92753	5.77532	-0.257784	0.188021
chr4_47463381_47463781	7.20737	6.59197	-0.615399	-0.434767	0.456581	ENSG00000169019.10	COMMD8	2.8717	3.54282	0.680168	0.0301431
chr16_70299030_70299430	4.053	4.27927	0.22627	0.410319	0.60172	ENSG00000157349.16	DDX19B	5.56857	6.04913	0.502034	0.0192537
chr22_35380883_35381283	5.49324	5.18492	-0.308323	-0.113345	0.895225	ENSG00000100292.16	HMOX1	4.67965	5.28123	0.628343	0.0340986
chr10_102132744_102133144	6.4943	6.68123	0.186934	0.389456	0.512358	ENSG00000148840.10	PPRC1	5.25777	5.54013	-0.0519338	0.793084
chr22_30505501_30505901	4.49079	4.61556	0.12477	0.337801	0.662561	ENSG00000133488.14	SEC14L4	3.00259	2.32265	-0.666913	0.0238167
chr5_137629584_137629984	3.60073	3.57444	-0.0262883	0.147432	0.906946	ENSG00000146021.14	KLHL3	-1.15343	-1.53186	-0.383902	0.455799
chr7_102478800_102479200	4.47423	4.56891	0.0946833	0.310784	0.698923	ENSG00000005075.15	POLR2J	6.53071	6.41139	-0.101397	0.570416
chr11_101914832_101915232	8.56252	7.90239	-0.200022	-0.471519	0.484707	ENSG00000110318.13	CEP126	-0.896428	-1.60679	-1.33677	0.029399
chr15_81324100_81324500	8.82938	8.30343	-0.66483	-0.334681	0.673935	ENSG00000172345.13	STARD5	1.89799	1.36607	-0.391029	0.41923
chr6_32195652_32196052	7.34903	7.61006	0.0484231	0.458706	0.45409	ENSG00000213654.9	GPSM3	0.200269	-0.271439	-0.732456	0.24319
chr11_32583542_32583942	7.37008	7.10173	-0.268352	-0.0810919	0.927939	ENSG00000149100.12	EIF3M	8.53951	8.75506	0.263175	0.119002
chr9_111631072_111631472	6.78987	6.57339	-0.216474	-0.0102055	0.991306	ENSG00000059769.19	DNAJC25	2.77396	2.41679	-0.328623	0.24935
chr11_94768078_94768478	6.9188	6.35529	-0.563519	-0.359397	0.560201	ENSG00000166025.17	AMOTL1	3.97464	2.61819	-1.38481	0.00152528
chr7_88219851_88220251	8.42718	7.79689	-0.890125	-0.429935	0.530044	ENSG00000075142.13	SRI	7.32266	7.49159	0.103844	0.61625
chr7_1556169_1556569	5.69929	5.47546	-0.22383	-0.036505	0.9689	ENSG00000164855.15	TMEM184A	3.79789	3.58184	-0.256935	0.218999
chr19_18323030_18323430	5.92073	6.42634	0.505612	0.7082	0.131974	ENSG00000130520.10	LSM4	8.43423	8.94785	0.549312	0.0111301
chr19_48954623_48955023	3.91525	4.91036	0.995113	1.16933	0.0240519	ENSG00000087088.19	BAX	7.25219	6.76837	-0.59256	0.0153664
chr8_143815532_143815932	5.54419	6.09496	0.0246831	0.710538	0.124788	ENSG00000180900.18	SCRIB	6.26871	6.34693	0.359404	0.0442036
chr12_56116290_56116690	5.48524	6.13829	0.653056	0.8517	0.0552917	ENSG00000229117.8	RPL41	12.1952	12.0513	-0.0907146	0.567579
chr14_91114068_91114468	4.56154	4.52747	-0.283888	0.156397	0.867943	ENSG00000133943.20	DGLUCY	2.78758	2.37564	-0.569275	0.0635125
chrX_154805323_154805723	6.73297	6.1203	-0.746167	-0.409246	0.479383	ENSG00000130830.14	MPP1	3.50905	2.7676	-0.748582	0.022069
chr2_219160612_219161012	6.28343	6.45578	-0.373844	0.379583	0.521472	ENSG00000187736.12	NHEJ1	3.28704	2.43482	-0.744398	0.0557955
chr2_241734372_241734772	5.57261	5.60547	0.0328517	0.223039	0.754688	ENSG00000180902.17	D2HGDH	2.41085	2.46266	0.00197251	0.994697
chr8_143829248_143829648	7.09043	7.42926	0.338829	0.529413	0.348335	ENSG00000179950.13	PUF60	8.11036	8.78061	0.728305	0.00289449
chr13_98576916_98577316	5.73651	5.06498	-0.493713	-0.559827	0.284316	ENSG00000102572.14	STK24	5.55521	6.13407	0.644019	0.005885
chr7_133252787_133253187	7.15626	6.75361	-0.40265	-0.24408	0.730375	ENSG00000131558.14	EXOC4	4.59304	4.5383	-0.114976	0.500109
chr19_44747428_44747828	5.072	5.78083	0.631746	0.887255	0.0511202	ENSG00000069399.14	BCL3	4.38456	4.48251	0.152886	0.474617
chr17_81527874_81528274	4.67747	3.58107	-1.09641	-0.883842	0.150607	ENSG00000186765.11	FSCN2	0.362936	-0.77186	-1.42702	0.0396338
chrX_49235369_49235769	5.07325	5.16422	0.0909689	0.306259	0.670263	ENSG00000101997.12	CCDC22	3.5473	4.09776	0.562344	0.0217526
chr11_43358694_43359094	7.5663	7.04592	-0.829308	-0.318183	0.641303	ENSG00000052841.14	TTC17	4.20268	4.77362	0.372616	0.0630633
chr9_122913155_122913555	5.85451	5.5188	-0.335704	-0.188367	0.794793	ENSG00000186130.4	ZBTB6	1.44196	1.66398	0.249699	0.366503
chr3_128153228_128153628	5.59272	5.81425	0.22153	0.453366	0.429364	ENSG00000132394.10	EEFSEC	4.43354	4.11041	-0.322193	0.132333
chr3_44976039_44976439	5.55027	5.52138	-0.0288868	0.187824	0.806279	ENSG00000075914.12	EXOSC7	5.7414	6.38316	0.640088	0.0104163
chr11_13463073_13463473	7.55176	7.15055	-0.279212	-0.214924	0.77949	ENSG00000148925.10	BTBD10	3.44404	3.91578	0.516468	0.0499309
chr1_39901899_39902299	5.7341	5.70255	-0.031551	0.126177	0.872879	ENSG00000116990.10	MYCL	1.65494	0.916263	-0.745804	0.0691121
chr1_53838302_53838702	6.92098	7.03969	0.118707	0.308874	0.640195	ENSG00000058804.11	NDC1	5.08341	4.55121	-0.479457	0.0163239
chr14_101964269_101964669	5.20607	5.70187	0.201689	0.667563	0.178673	ENSG00000197102.11	DYNC1H1	7.30949	6.88729	-0.571317	0.0432628
chr3_142578667_142579067	7.65629	7.1327	-1.13576	-0.309207	0.656864	ENSG00000175054.14	ATR	2.62922	1.79978	-0.94713	0.00548429
chr11_65873492_65873892	5.62605	5.77778	0.151732	0.364453	0.551	ENSG00000172638.12	EFEMP2	0.242713	0.0306462	0.156072	0.825472
chr8_94895530_94895930	7.82061	7.3787	-0.229405	-0.23807	0.757053	ENSG00000156170.12	NDUFAF6	4.74116	5.33992	0.593861	0.0200627
chr18_36186698_36187098	4.00398	3.38898	-0.615009	-0.377401	0.703355	ENSG00000260552.1	AC023043.1	4.04337	2.91718	-1.10019	0.0763439
chrX_3843027_3843427	3.3941	3.85662	0.0516208	0.659652	0.428768	ENSG00000285756.1	BX890604.2	5.5987	5.95058	0.127477	0.523085
chr20_44909931_44910331	4.51739	4.53296	0.015576	0.257657	0.764334	ENSG00000101104.12	PABPC1L	2.91645	3.6013	0.7702	0.0158411
chr20_34303204_34303604	6.31059	6.82136	-0.266279	0.700652	0.145501	ENSG00000101444.12	AHCY	8.10895	8.19635	0.106896	0.475661
chr4_15938156_15938556	4.51396	3.59173	-0.92223	-0.733859	0.27001	ENSG00000137440.4	FGFBP1	-0.253176	-0.815197	-0.641909	0.345625
chr4_112637189_112637589	6.7927	6.41863	-0.374071	-0.175444	0.815638	ENSG00000174720.15	LARP7	3.05817	3.64541	0.555424	0.0350909
chr10_71766719_71767119	6.26731	6.05831	-0.0183125	0.00279613	0.997515	ENSG00000107738.19	VSIR	3.82865	4.28397	0.562033	0.0190709
chrX_15335457_15335857	8.71741	8.27392	-0.385032	-0.246539	0.774232	ENSG00000165195.15	PIGA	3.46395	3.48051	0.147707	0.543437
chr17_2401482_2401882	6.5356	6.80783	0.136052	0.471621	0.397159	ENSG00000070444.14	MNT	3.60237	3.18503	-0.355876	0.104588
chr12_133130221_133130621	7.57396	7.4344	-0.139555	0.0489149	0.959895	ENSG00000214029.4	ZNF891	-1.42083	-1.10212	0.434397	0.222558
chr9_137590404_137590804	6.00486	6.2305	0.225633	0.392427	0.488939	ENSG00000165724.5	ZMYND19	5.75567	6.41532	0.67839	0.00797023
chr20_45415915_45416315	5.36901	4.97198	-0.0231845	-0.197729	0.804995	ENSG00000124155.17	PIGT	6.50404	6.36641	-0.166816	0.278931
chrX_120469135_120469535	7.24276	6.53293	-0.709834	-0.510358	0.355239	ENSG00000005893.15	LAMP2	5.43227	5.44742	-0.102252	0.558356
chr7_130486295_130486695	3.75455	3.85819	0.103648	0.264436	0.796336	ENSG00000106484.15	MEST	4.07168	3.64789	-0.241744	0.243883
chr3_160399075_160399475	7.71638	7.28892	-0.427454	-0.226814	0.768563	ENSG00000068885.14	IFT80	2.02838	1.10482	-0.636751	0.0547968
chr1_11934459_11934859	5.36955	4.82523	-0.0569805	-0.336733	0.629974	ENSG00000083444.16	PLOD1	7.04743	7.09923	0.0743558	0.624232
chrX_154428392_154428792	5.89233	6.0056	0.113277	0.318701	0.608631	ENSG00000071553.16	ATP6AP1	6.90684	6.69082	-0.213616	0.221324
chr21_44801660_44802060	5.17963	4.7207	-0.458934	-0.260606	0.736347	ENSG00000184787.18	UBE2G2	5.75053	5.749	0.140129	0.380221
chr7_38341282_38341682	5.61628	4.59398	-1.0223	-0.840887	0.0923738	ENSG00000281103.1	TRG-AS1	-0.953626	-0.823734	-1.05617	0.246161
chrX_63755020_63755420	7.40867	6.97274	-0.435926	-0.206355	0.790768	ENSG00000131089.15	ARHGEF9	3.22909	2.61013	-1.03633	0.00438998
chr1_51878658_51879058	6.67815	6.9067	0.228551	0.431935	0.458977	ENSG00000078618.21	NRDC	5.98386	5.95092	-0.101707	0.508766
chr9_132079668_132080068	3.32143	4.61506	1.29363	1.46835	0.00730894	ENSG00000160563.13	MED27	4.77282	5.40614	0.647699	0.00955466
chr11_86955247_86955647	7.84957	7.31462	-0.534948	-0.3291	0.637056	ENSG00000174804.3	FZD4	0.95229	0.0262079	-0.998161	0.00797023
chr18_31658098_31658498	4.32186	3.6439	-0.677958	-0.484813	0.542624	ENSG00000118276.11	B4GALT6	-1.07921	-1.10545	0.0460774	0.949586
chr6_43059365_43059765	5.93781	6.28939	0.351573	0.545851	0.282702	ENSG00000112651.11	MRPL2	6.90258	7.19546	0.326383	0.103108
chr19_16471912_16472312	5.73222	6.30978	0.577563	0.765513	0.0923738	ENSG00000127527.13	EPS15L1	4.59115	4.73836	0.0495505	0.792436
chr19_58466762_58467162	6.45987	6.40207	-0.0578037	0.14176	0.856371	ENSG00000083812.11	ZNF324	2.73798	2.23089	-0.481435	0.0633203
chr2_218659451_218659851	5.70677	5.73584	0.02907	0.25394	0.715645	ENSG00000074582.13	BCS1L	4.84687	5.3801	0.645898	0.0107977
chr16_57535897_57536297	6.34185	6.42484	0.0420708	0.268079	0.683145	ENSG00000135736.5	CCDC102A	3.20947	3.64483	0.259594	0.364009
chr6_28124422_28124822	4.84901	4.23711	-0.611905	-0.433171	0.54186	ENSG00000196812.4	ZSCAN16	0.21872	0.0701276	-0.129459	0.842773
chr19_49527703_49528103	4.60199	4.4353	-0.166691	0.0171818	0.988435	ENSG00000142552.7	RCN3	5.24969	3.85223	-1.37412	0.000816132
chr10_27100287_27100687	5.88445	5.79342	-0.0910322	0.0964755	0.907302	ENSG00000107890.16	ANKRD26	0.271896	0.575117	-0.0447219	0.904162
chr16_30075780_30076180	4.00441	4.20717	0.202755	0.345374	0.681991	ENSG00000149923.13	PPP4C	5.63385	5.83803	0.269992	0.150203
chr11_120124948_120125348	5.54473	4.12491	-1.02843	-1.20257	0.013528	ENSG00000137699.16	TRIM29	5.25572	4.39792	-0.994817	0.00211267
chr11_14499656_14500056	5.96695	5.85772	-0.109233	0.0738559	0.930551	ENSG00000129083.12	COPB1	5.86504	5.43496	-0.40728	0.025653
chr5_1633789_1634189	6.79226	6.71891	-0.073352	0.127132	0.876191	ENSG00000188002.10	AC026412.1	2.9873	3.76239	0.877204	0.0125964
chr16_30065394_30065794	6.36617	6.55592	0.189746	0.418442	0.474388	ENSG00000149925.18	ALDOA	10.4169	10.4703	0.0382958	0.815571
chr1_111449096_111449496	7.78742	7.5304	-0.257021	-0.049578	0.959926	ENSG00000116455.13	WDR77	6.54022	7.05801	0.673913	0.00663656
chr7_131556456_131556856	6.8204	6.17661	-0.014316	-0.47592	0.382629	ENSG00000128567.16	PODXL	6.4053	5.33789	-0.965809	0.00331115
chr19_39532687_39533087	4.52556	5.02346	0.497896	0.708093	0.215962	ENSG00000176401.5	EID2B	1.68011	1.12727	-0.620685	0.155858
chr3_172711010_172711410	8.18573	7.56921	-0.357133	-0.40029	0.555177	ENSG00000144959.9	NCEH1	3.50173	4.1549	0.699383	0.00952449
chr1_24502670_24503070	5.49291	5.49109	-0.0018211	0.184904	0.807421	ENSG00000117602.11	RCAN3	2.02977	2.64537	0.334614	0.268088
chr11_69638946_69639346	4.80748	4.88256	0.466898	0.254078	0.747367	ENSG00000110092.3	CCND1	5.58364	5.75555	0.0684165	0.69709
chr3_120596053_120596453	7.27889	6.83127	-0.447615	-0.258602	0.714842	ENSG00000065518.7	NDUFB4	8.06568	8.28871	0.247783	0.200109
chr20_50790634_50791034	5.30962	5.43908	0.563275	0.301513	0.650852	ENSG00000124243.17	BCAS4	0.0502197	-0.561717	-0.438518	0.514898
chr21_42009815_42010215	6.52136	6.52003	-0.00133522	0.206373	0.776106	ENSG00000173276.13	ZBTB21	1.99858	2.03843	-0.0784072	0.759984
chr9_135500403_135500803	5.96119	5.9513	-0.00988754	0.199835	0.78154	ENSG00000122140.10	MRPS2	6.85424	7.05007	0.279674	0.0942474
chr1_44355122_44355522	6.34249	6.54753	-0.270882	0.378529	0.518716	ENSG00000117419.15	ERI3	6.13796	6.26695	0.146977	0.3862
chr12_55997016_55997416	6.92548	6.77611	0.0639737	0.0652387	0.942995	ENSG00000139531.12	SUOX	4.30817	4.33096	0.0578323	0.774903
chr3_66997934_66998334	7.82621	7.32466	-0.501544	-0.31776	0.650151	ENSG00000163376.11	KBTBD8	-1.05889	-0.321928	1.14821	0.0430116
chr22_37178517_37178917	4.95201	3.80906	-0.74514	-0.92843	0.10407	ENSG00000100385.13	IL2RB	-0.736966	-2.06015	-2.0069	0.0145036
chr18_46917319_46917719	5.19842	5.24799	0.0495666	0.211847	0.781803	ENSG00000078043.15	PIAS2	3.01246	2.71005	-0.327567	0.193898
chr16_86567173_86567573	2.78635	3.53348	0.74713	0.873126	0.371784	ENSG00000176692.6	FOXC2	2.2007	1.62158	-0.584737	0.0578587
chrX_149505125_149505525	7.52128	6.82592	-0.695359	-0.477643	0.417953	ENSG00000010404.17	IDS	3.24196	3.61567	-0.118496	0.596777
chr2_112481272_112481672	5.34664	5.38756	0.0409105	0.223661	0.761266	ENSG00000114999.7	TTL	5.18603	4.70561	-0.496217	0.0155937
chr7_114922531_114922931	5.72436	5.10048	-0.623886	-0.406261	0.510054	ENSG00000135272.10	MDFIC	2.91462	3.05301	-0.124668	0.706213
chr5_31408812_31409212	6.9751	5.86502	-1.11007	-0.851188	0.0735632	ENSG00000113360.16	DROSHA	5.47432	6.28254	0.237109	0.135876
chr16_30893982_30894382	6.33356	6.49351	0.0539795	0.350781	0.56211	ENSG00000099385.11	BCL7C	5.09874	5.77878	0.693617	0.00654122
chr4_38867511_38867911	6.03194	5.23384	-0.798091	-0.587269	0.253846	ENSG00000197712.11	FAM114A1	4.53197	3.40126	-1.17089	0.00174782
chrX_46912192_46912592	5.73981	5.79572	0.0559081	0.267586	0.689758	ENSG00000102221.13	JADE3	3.61847	2.67035	-0.937687	0.00265918
chr17_62065840_62066240	5.83341	6.23808	0.404666	0.602139	0.221749	ENSG00000108510.9	MED13	2.87256	2.87223	-0.00294772	0.991678
chr6_33788961_33789361	5.38441	5.57372	-0.112928	0.387344	0.525772	ENSG00000161904.11	LEMD2	4.88337	5.44433	0.534293	0.0153246
chr17_8126421_8126821	4.55452	4.42631	-0.128213	0.0579789	0.957061	ENSG00000179111.8	HES7	4.32438	3.11746	-1.18879	0.0107599
chr14_24081095_24081495	4.93599	5.01833	0.082339	0.285958	0.70436	ENSG00000129535.12	NRL	-0.522716	0.565301	1.22995	0.0499289
chr15_40894164_40894564	5.05603	5.36478	0.00342565	0.493394	0.398939	ENSG00000104142.10	VPS18	3.90396	3.84454	-0.0388297	0.864593
chr12_10613446_10613846	6.42536	6.01475	-0.414279	-0.203837	0.775443	ENSG00000111196.9	MAGOHB	5.79222	5.95381	0.0922677	0.649553
chr1_19596701_19597101	5.97322	6.25747	-0.287458	0.458814	0.394252	ENSG00000158747.14	NBL1	5.36446	5.61412	0.467092	0.0269874
chr2_218687423_218687823	3.44761	3.46901	0.0214039	0.236535	0.851057	ENSG00000163482.11	STK36	3.09426	3.11415	-0.25966	0.305363
chr2_46939_47339	7.23352	6.19454	-1.03898	-0.841543	0.0692513	ENSG00000184731.5	FAM110C	1.43263	1.95828	0.0522304	0.871488
chr15_42920738_42921138	5.71671	5.9082	0.191495	0.361477	0.541739	ENSG00000128881.16	TTBK2	0.414316	0.55371	-0.504894	0.106331
chr10_35090233_35090633	6.11373	6.01022	-0.103509	0.105334	0.89715	ENSG00000108094.14	CUL2	4.31097	4.46873	0.376943	0.06207
chr11_96343163_96343563	6.87544	6.69205	-0.183392	-0.0125083	0.989482	ENSG00000184384.13	MAML2	0.724609	-1.14175	-1.92205	0.00297248
chr6_32178071_32178471	6.96149	6.78999	-0.171505	0.0400876	0.966348	ENSG00000204308.7	RNF5	6.24143	5.68162	-0.542694	0.0171485
chr12_54036842_54037242	5.69945	5.2345	-0.1603	-0.246763	0.731206	ENSG00000198353.7	HOXC4	2.92851	1.21776	-1.76848	0.00217441
chr8_25184444_25184844	6.27293	5.74071	-0.303229	-0.364491	0.533315	ENSG00000147459.17	DOCK5	3.72978	2.72903	-1.20988	0.00328762
chr19_32580938_32581338	6.98229	7.06496	0.0826714	0.298461	0.66156	ENSG00000105185.11	PDCD5	8.12137	8.72587	0.635312	0.00682109
chr20_34825145_34825545	4.82091	4.89775	0.0768448	0.252655	0.748106	ENSG00000198646.13	NCOA6	3.68575	2.82913	-1.04871	0.00236587
chr12_50504770_50505170	5.47969	5.65186	0.172168	0.341578	0.580798	ENSG00000066084.12	DIP2B	4.06464	3.97137	-0.0344344	0.903431
chr15_44711253_44711653	6.76249	6.39203	-0.370459	-0.168006	0.825538	ENSG00000166710.18	B2M	10.095	9.64643	-0.424672	0.0266607
chr4_168631391_168631791	6.60815	5.91878	-0.694835	-0.498173	0.347005	ENSG00000129116.18	PALLD	5.3153	4.34839	-1.05523	0.00212253
chr9_33001405_33001805	6.52008	6.33926	-0.180817	0.0264182	0.977896	ENSG00000137074.18	APTX	5.54439	5.54229	0.0449981	0.815147
chr11_65314663_65315063	5.89491	5.93067	-0.1409	0.228104	0.739032	ENSG00000149798.4	CDC42EP2	3.3496	2.89068	-0.462501	0.12163
chr11_43643965_43644365	6.02028	5.65936	-0.360913	-0.152387	0.843913	ENSG00000283341.1	AC068205.2	-0.956608	-1.20521	-0.166697	0.825697
chr5_134632629_134633029	4.35287	4.7586	0.40573	0.614892	0.326114	ENSG00000152700.13	SAR1B	4.44227	4.8843	0.0765098	0.707993
chr19_9621023_9621423	4.44141	4.36867	-0.0727353	0.0879013	0.933033	ENSG00000171469.10	ZNF561	3.38927	3.32661	0.142982	0.52667
chr16_22374539_22374939	5.41777	5.64315	0.225377	0.407305	0.488533	ENSG00000140743.7	CDR2	3.96712	3.77412	-0.174207	0.3815
chr22_21044930_21045330	4.08917	3.39118	-0.697984	-0.519908	0.545249	ENSG00000206145.8	P2RX6P	2.27354	1.65142	-0.600622	0.393886
chr12_106774016_106774416	7.51207	7.09152	-0.42055	-0.237505	0.74843	ENSG00000111785.19	RIC8B	2.78009	2.9848	0.378609	0.131069
chrX_78139463_78139863	7.19149	6.62499	-0.566494	-0.373318	0.548397	ENSG00000187325.4	TAF9B	2.82909	2.0226	-0.843806	0.0107599
chr12_93377659_93378059	6.80793	6.94504	0.13711	0.337735	0.597584	ENSG00000173598.13	NUDT4	4.32556	4.57617	0.0949061	0.616347
chr1_44799944_44800344	7.08347	7.40363	0.317824	0.518152	0.362456	ENSG00000173846.12	PLK3	3.37882	3.7382	0.376195	0.141052
chr2_45651016_45651416	6.04028	6.34359	0.243137	0.513936	0.328689	ENSG00000171132.13	PRKCE	1.23429	2.28535	0.954763	0.00845271
chr17_17591616_17592016	6.21434	6.62763	0.413286	0.621242	0.211562	ENSG00000133027.17	PEMT	5.66669	6.03473	0.387092	0.0562378
chr12_9634199_9634599	3.07761	3.17268	0.0950685	0.211725	0.888104	ENSG00000284634.1	AC092821.3	-1.20177	-0.457424	1.05552	0.1479
chr18_32470712_32471112	7.77793	6.80629	-0.971643	-0.776004	0.121047	ENSG00000141441.15	GAREM1	-0.402074	-0.0144996	0.906863	0.107951
chr16_589700_590100	6.46963	6.82663	0.0209879	0.537403	0.307966	ENSG00000197562.9	RAB40C	4.5501	4.65776	0.140178	0.437571
chr17_42783436_42783836	2.45423	3.86196	1.40774	1.5864	0.0418544	ENSG00000126562.16	WNK4	0.782018	0.651086	0.0468112	0.922764
chr19_58326882_58327282	6.64076	6.50026	-0.140507	0.0604407	0.946057	ENSG00000182318.5	ZSCAN22	1.46728	1.62994	0.17587	0.492996
chr1_155934271_155934671	6.00308	6.37318	0.370094	0.585409	0.244625	ENSG00000132680.10	KHDC4	4.55967	5.09411	0.569758	0.0127255
chr20_34112130_34112530	5.79736	6.25549	0.458132	0.655051	0.172299	ENSG00000125977.6	EIF2S2	6.02117	6.74031	0.730925	0.00303615
chr2_174682222_174682622	5.42618	4.51952	-0.740546	-0.719404	0.183944	ENSG00000115935.17	WIPF1	4.03446	3.20861	-1.03942	0.0064816
chr7_98400974_98401374	7.32595	7.64809	-0.00799011	0.515881	0.377072	ENSG00000006453.13	BAIAP2L1	5.18005	5.00512	-0.0765923	0.696501
chr2_151409670_151410070	7.01333	6.6239	-0.389428	-0.216342	0.765865	ENSG00000080345.17	RIF1	1.82415	2.00248	0.0806344	0.744914
chr11_47153049_47153449	4.66654	4.75836	-0.0285114	0.24742	0.760527	ENSG00000149179.13	C11orf49	5.18805	5.10534	-0.148859	0.483275
chr2_162244548_162244948	6.67585	6.163	-0.807287	-0.271321	0.690939	ENSG00000078098.13	FAP	1.18315	0.643027	-0.57955	0.13775
chr3_187745475_187745875	6.10302	6.38844	0.28542	0.492692	0.355881	ENSG00000113916.17	BCL6	3.67255	2.48072	-1.09058	0.00367698
chr5_37371090_37371490	8.57323	8.10849	-0.464743	-0.254896	0.759843	ENSG00000113569.15	NUP155	6.19254	6.83289	0.367951	0.0363632
chr11_126282976_126283376	5.65042	5.46348	-0.186935	0.0342599	0.971476	ENSG00000150455.13	TIRAP	2.7008	2.08212	-0.701448	0.0423227
chr5_154940903_154941303	6.47309	6.09995	-0.373137	-0.183101	0.80176	ENSG00000082515.17	MRPL22	6.61222	7.16022	0.511302	0.01977
chr6_3258689_3259089	6.34992	6.72137	0.371445	0.541387	0.295821	ENSG00000180822.11	PSMG4	5.43395	6.72679	1.17754	0.00157534
chr19_6393165_6393565	4.69059	4.70756	0.0169662	0.203686	0.813246	ENSG00000125651.13	GTF2F1	5.70208	6.21387	0.591035	0.00730035
chr12_11171405_11171805	7.78644	7.16498	-0.977112	-0.412569	0.520244	ENSG00000212127.5	TAS2R14	-1.64245	-1.79364	-0.0680639	0.949574
chr17_58006502_58006902	3.53087	4.31697	0.786097	0.955285	0.130397	ENSG00000279069.1	AC015813.5	0.307331	0.476167	0.18863	0.773706
chr14_58244569_58244969	7.01604	6.76164	0.0602091	-0.0513406	0.956247	ENSG00000100567.12	PSMA3	6.96744	7.08976	0.17942	0.303315
chr1_23959510_23959910	5.76232	6.2135	0.451186	0.653044	0.175791	ENSG00000189266.12	PNRC2	4.80042	4.35598	-0.203871	0.27176
chr19_633433_633833	5.68065	5.98153	0.295039	0.489346	0.356873	ENSG00000099821.13	POLRMT	5.59935	6.59061	0.880311	0.00163565
chr1_159854645_159855045	8.14539	7.47914	-0.666253	-0.46011	0.473549	ENSG00000188004.10	SNHG28	-2.22111	-1.43493	0.604153	0.641271
chr6_37257505_37257905	6.27536	6.47732	0.201968	0.403066	0.484707	ENSG00000065491.8	TBC1D22B	3.22168	3.11352	-0.100947	0.629958
chr1_96445254_96445654	2.77157	3.20119	0.429618	0.658714	0.611993	ENSG00000228502.1	EEF1A1P11	-1.10212	-1.55702	-0.612347	0.481591
chr11_47214222_47214622	6.85729	6.72483	-0.152762	0.0679242	0.939568	ENSG00000134574.11	DDB2	5.96358	5.56452	-0.460035	0.0321803
chr1_150487141_150487541	5.87786	5.859	-0.0188584	0.192368	0.792392	ENSG00000143374.16	TARS2	5.95561	6.11718	0.17137	0.271929
chr8_144094777_144095177	6.53692	6.63252	0.095598	0.290515	0.655682	ENSG00000179091.4	CYC1	8.69348	9.07625	0.393642	0.0360588
chr11_65662912_65663312	6.42922	6.32604	-0.103181	0.0969552	0.907306	ENSG00000173039.18	RELA	5.70866	6.1844	0.458554	0.0174466
chr17_81295119_81295519	4.86443	4.97782	0.113391	0.299189	0.687349	ENSG00000157637.12	SLC38A10	5.63769	5.07487	-0.562584	0.0100767
chr2_225042193_225042593	4.72826	4.49161	-0.142081	-0.0539708	0.95957	ENSG00000135905.19	DOCK10	1.49602	0.482846	-0.933529	0.015386
chr20_18497032_18497432	6.24532	5.76246	-0.482858	-0.289593	0.649081	ENSG00000089050.15	RBBP9	2.68863	2.27896	-0.40927	0.106831
chr1_202861473_202861873	5.68719	5.59335	-0.0938488	0.103678	0.900268	ENSG00000214796.8	AC098934.1	0.904398	0.837095	-0.112643	0.866964
chr16_89995807_89996207	4.43094	4.87986	0.448917	0.604194	0.318917	ENSG00000223959.8	AFG3L1P	4.17652	4.65248	0.325659	0.135903
chr12_56468329_56468729	4.99655	5.3771	0.380555	0.587714	0.293735	ENSG00000176422.13	SPRYD4	1.25923	0.196433	-1.12066	0.00322869
chr1_26432045_26432445	5.12339	5.22663	0.103242	0.270133	0.708334	ENSG00000117682.16	DHDDS	4.23573	4.44091	0.389761	0.0602428
chr5_178130691_178131091	5.75886	5.40115	-0.750025	-0.16255	0.833904	ENSG00000145916.18	RMND5B	4.6014	4.23112	-0.350693	0.0887388
chr12_43835698_43836098	7.52287	6.56432	-0.600229	-0.765308	0.118138	ENSG00000139173.9	TMEM117	1.89404	2.24711	0.281078	0.360707
chr7_43248873_43249273	6.69534	5.52662	-0.821473	-0.961858	0.0253649	ENSG00000002746.14	HECW1	2.56673	0.92002	-2.61818	0.00103472
chr15_41621351_41621751	5.30275	5.76769	0.366271	0.64322	0.194867	ENSG00000174197.16	MGA	2.66454	2.15833	-0.490552	0.314426
chr12_7060403_7060803	6.16977	5.41122	-0.758554	-0.533574	0.314221	ENSG00000182326.14	C1S	5.13321	4.43944	-0.676867	0.00708089
chr1_151254588_151254988	6.30486	6.71427	0.409418	0.612665	0.221635	ENSG00000159352.15	PSMD4	8.03335	7.97278	-0.0420844	0.791799
chr8_91040619_91041019	5.18337	4.46694	-0.71643	-0.514191	0.417954	ENSG00000155099.7	PIP4P2	0.826851	1.20755	0.266317	0.627996
chr1_208244200_208244600	6.23638	5.90249	-0.474185	-0.122467	0.8781	ENSG00000076356.6	PLXNA2	0.795935	-0.786733	-1.98616	0.00106611
chr10_29409551_29409951	5.39019	5.36674	-0.0234499	0.167126	0.833521	ENSG00000224597.10	SVIL-AS1	4.20084	4.54574	0.740215	0.0145507
chr17_82022902_82023302	7.07962	7.49081	0.411199	0.615728	0.253413	ENSG00000169683.7	LRRC45	4.40579	4.77132	0.374238	0.0878822
chr16_11345179_11345579	5.03496	5.62013	0.327711	0.776555	0.111705	ENSG00000175643.9	RMI2	3.1555	3.18854	0.221095	0.579899
chr12_54324778_54325178	6.99096	7.44542	0.454457	0.644997	0.218265	ENSG00000111481.9	COPZ1	8.02248	8.25725	0.347409	0.0395144
chr12_6540423_6540823	5.42939	4.62967	-0.799723	-0.609683	0.280644	ENSG00000269968.1	AC006064.4	1.2268	2.06676	0.915564	0.195691
chr10_80205424_80205824	6.72585	6.62334	-0.967529	0.0875197	0.918723	ENSG00000122359.17	ANXA11	7.08426	7.47766	0.0474269	0.768745
chr10_78029377_78029777	5.43205	5.79205	0.359999	0.536721	0.30415	ENSG00000148606.12	POLR3A	4.18686	4.19604	0.0568215	0.804587
chr1_150067487_150067887	5.99452	6.28836	0.29384	0.482638	0.362881	ENSG00000136631.14	VPS45	4.07111	4.2261	0.150797	0.446076
chr17_76737235_76737635	6.66743	7.21852	0.13844	0.746275	0.12891	ENSG00000092931.11	MFSD11	3.56413	3.2094	-0.267486	0.243026
chr3_23945798_23946198	8.36228	8.27669	-0.26445	0.106128	0.913891	ENSG00000174738.12	NR1D2	2.39506	2.03625	-0.405988	0.094384
chr8_67343670_67344070	6.60765	6.08011	-0.527544	-0.310303	0.625154	ENSG00000066777.8	ARFGEF1	2.33657	2.6372	-0.148114	0.534884
chr5_132866360_132866760	6.99436	7.15528	0.160919	0.382138	0.546114	ENSG00000164404.8	GDF9	-2.21798	-1.48798	1.0477	0.243232
chr19_49640207_49640607	6.61823	6.95848	0.340256	0.55886	0.296815	ENSG00000126458.3	RRAS	5.1465	4.26198	-0.8614	0.0066032
chr22_18149817_18150217	5.6934	5.53744	-0.155957	0.0720901	0.935627	ENSG00000184979.9	USP18	3.90054	3.87907	-0.010011	0.967251
chr2_112054207_112054607	7.09299	7.14353	0.0505406	0.225912	0.759525	ENSG00000153214.10	TMEM87B	1.83931	2.24564	0.203152	0.430182
chr6_43575940_43576340	6.12481	6.07914	-0.0456783	0.151507	0.843049	ENSG00000124571.17	XPO5	5.48096	5.74063	0.122555	0.440253
chr3_52831595_52831995	5.49113	4.44716	-0.281232	-0.822441	0.120351	ENSG00000055955.15	ITIH4	0.984838	-0.254099	-1.53941	0.0119796
chr8_22565258_22565658	4.64602	4.20777	-0.438258	-0.228521	0.797251	ENSG00000120896.13	SORBS3	5.82201	6.07723	0.285641	0.133398
chr17_44308329_44308729	4.20914	5.0002	0.791061	0.949982	0.0722589	ENSG00000108309.13	RUNDC3A	-0.947697	-1.76641	0.0123243	0.991678
chr19_18281575_18281975	7.26101	7.52521	0.264203	0.447281	0.463257	ENSG00000130522.5	JUND	6.58271	5.92461	-0.653084	0.0131128
chr9_34651990_34652390	6.48227	6.67131	0.189037	0.38917	0.512061	ENSG00000137070.17	IL11RA	2.02688	2.39975	0.395603	0.262942
chr7_27143568_27143968	5.90378	6.06622	0.16244	0.376165	0.524705	ENSG00000106004.4	HOXA5	4.19739	4.37074	0.115063	0.606713
chr3_15859603_15860003	7.49309	6.88707	-0.088083	-0.41808	0.494222	ENSG00000206560.11	ANKRD28	3.78611	3.90618	0.235278	0.200417
chr8_66432237_66432637	5.41281	5.1795	-0.190353	-0.0492676	0.958913	ENSG00000147576.16	ADHFE1	-0.277772	-0.877191	-0.959286	0.177472
chr10_119080663_119081063	6.91447	6.95229	0.0378277	0.238822	0.738497	ENSG00000107581.12	EIF3A	6.30907	6.24176	-0.00234224	0.991451
chr7_66628690_66629090	7.76693	7.81267	0.0679217	0.247186	0.750629	ENSG00000243335.9	KCTD7	2.25492	2.22223	-0.0544801	0.846196
chr6_31827279_31827679	7.56285	7.59056	0.0277137	0.226815	0.77032	ENSG00000204388.6	HSPA1B	7.32938	8.17641	0.858489	0.0203127
chr1_30909940_30910340	4.2046	3.70142	-0.480665	-0.385704	0.653348	ENSG00000162512.15	SDC3	5.41499	3.72277	-1.43869	0.000573661
chr3_161221060_161221460	7.67045	7.26029	-1.00993	-0.209525	0.789223	ENSG00000169251.12	NMD3	5.13486	4.7818	-0.25364	0.174947
chr13_50081880_50082280	5.84485	5.88994	-0.337153	0.244171	0.719168	ENSG00000176124.12	DLEU1	4.04557	3.7594	-0.343069	0.180234
chr2_3379527_3379927	7.47507	7.12277	-0.376887	-0.142489	0.865608	ENSG00000171853.15	TRAPPC12	4.69088	4.71397	-0.113562	0.550455
chrX_130110475_130110875	6.09035	5.44461	-0.645741	-0.463429	0.394099	ENSG00000102034.16	ELF4	4.56675	2.75281	-1.8373	0.00039247
chr15_40440661_40441061	5.29769	5.13372	-0.455289	0.0256798	0.980337	ENSG00000140320.11	BAHD1	3.99175	4.29458	0.32459	0.087998
chr9_128504464_128504864	4.79782	5.34555	0.547732	0.702901	0.180915	ENSG00000119392.14	GLE1	5.37599	5.90968	0.550169	0.0087668
chr7_108526036_108526436	9.2843	8.75867	-0.525638	-0.332433	0.702364	ENSG00000135241.16	PNPLA8	2.48974	2.68662	0.297729	0.217339
chr6_5057076_5057476	4.68997	4.51506	-0.174904	-0.0339353	0.975373	ENSG00000271978.1	AL359643.2	-1.84019	-1.46508	0.549355	0.414661
chr17_64836996_64837396	5.53293	5.27938	-0.253544	-0.0844781	0.922987	ENSG00000214176.9	PLEKHM1P1	1.39849	1.59485	0.207026	0.552315
chr18_36129622_36130022	6.78947	6.56349	-0.225975	-0.0166089	0.986554	ENSG00000134759.13	ELP2	6.01547	6.07278	-0.140598	0.399257
chr15_72230990_72231390	6.94423	7.5337	0.370345	0.764222	0.126585	ENSG00000067225.17	PKM	11.1934	11.0839	-0.0950456	0.5198
chr17_66191942_66192342	5.05848	4.31869	-0.590869	-0.558154	0.3741	ENSG00000154240.16	CEP112	-0.964256	-0.26142	0.640513	0.3519
chr6_111605762_111606162	5.70362	5.50587	0.216634	0.00984836	0.991592	ENSG00000056972.18	TRAF3IP2	4.70241	4.04002	-0.928508	0.00327883
chr3_112653529_112653929	6.61812	6.31416	-0.481374	-0.0295475	0.976756	ENSG00000091986.15	CCDC80	3.45999	2.17395	-1.40226	0.00168484
chr7_156949505_156949905	6.02995	5.75924	-0.270707	-0.0622687	0.943834	ENSG00000146909.7	NOM1	3.72039	4.18097	0.349651	0.0856257
chr14_95319651_95320051	4.39432	3.80753	-0.586782	-0.482667	0.523212	ENSG00000165959.11	CLMN	0.684915	1.03447	-0.0907647	0.835915
chr1_166839155_166839555	8.16786	7.42003	-0.747834	-0.572394	0.332455	ENSG00000143157.11	POGK	4.84097	4.62241	-0.210107	0.246103
chr1_1308187_1308587	5.92467	5.95254	0.0278657	0.226199	0.742708	ENSG00000169972.11	PUSL1	5.13484	4.5676	-0.519894	0.03164
chr15_59657370_59657770	5.71838	5.7134	-0.0049793	0.218222	0.762457	ENSG00000140307.10	GTF2A2	6.35323	6.82442	0.547202	0.015704
chr1_84077797_84078197	8.85393	8.28962	-0.613431	-0.370321	0.630087	ENSG00000142875.19	PRKACB	3.43338	3.11777	-0.12652	0.54354
chr3_30606337_30606737	7.87594	6.91025	-0.965693	-0.727883	0.169129	ENSG00000163513.17	TGFBR2	3.83008	2.53712	-1.29792	0.00455104
chr9_87725917_87726317	6.30841	6.30025	-0.00815844	0.194713	0.78769	ENSG00000135047.14	CTSL	7.65878	7.68751	0.0883284	0.574333
chr12_50763801_50764201	6.2251	6.72114	0.496049	0.727751	0.13228	ENSG00000123268.8	ATF1	5.63001	6.16971	0.491096	0.033862
chr4_122922808_122923208	6.33564	6.15845	-0.177189	0.0328645	0.971717	ENSG00000145375.7	SPATA5	1.49819	1.43895	0.146765	0.645562
chr7_107580055_107580455	7.0887	6.86143	-1.13923	-0.0268629	0.978268	ENSG00000075790.10	BCAP29	4.8519	5.2411	0.14524	0.487636
chr12_121513799_121514199	4.89722	4.75672	0.0259265	0.0832856	0.933939	ENSG00000089094.18	KDM2B	4.4494	4.69097	0.138675	0.471877
chr18_23503170_23503570	5.6203	5.87777	0.276687	0.477766	0.386079	ENSG00000141452.9	RMC1	3.54171	4.10713	0.388754	0.093283
chr1_156020765_156021165	5.5657	5.77122	0.205523	0.395351	0.498962	ENSG00000163479.13	SSR2	8.55827	7.90956	-0.637602	0.00450954
chr6_20534288_20534688	5.84243	5.37706	-0.5885	-0.292276	0.651522	ENSG00000145996.11	CDKAL1	2.63889	2.37723	-0.274625	0.250131
chr17_18258128_18258528	6.20707	5.7834	-0.00758887	-0.183467	0.808092	ENSG00000177731.15	FLII	6.88903	7.27907	-0.0728557	0.632001
chr14_75051249_75051649	4.36103	4.0419	-0.319137	-0.130267	0.899192	ENSG00000119684.15	MLH3	1.64033	1.61701	-0.466137	0.109445
chr4_992538_992938	5.64101	5.43472	-0.206296	-0.0207711	0.983365	ENSG00000145217.13	SLC26A1	-1.04279	-1.47616	-0.630875	0.399596
chr4_24584420_24584820	6.17006	6.38491	0.214848	0.428601	0.44945	ENSG00000109606.12	DHX15	5.93883	6.10187	0.144474	0.374565
chr2_121755338_121755738	7.29999	7.22608	-0.0739076	0.127538	0.881306	ENSG00000211460.11	TSN	5.45951	5.93127	0.485099	0.0171131
chr2_238203526_238203926	5.68255	5.75186	0.0693107	0.245823	0.717004	ENSG00000132323.8	ILKAP	4.40599	5.13956	0.782624	0.00619683
chr11_111735701_111736101	6.48715	6.4488	-0.0620726	0.151607	0.844159	ENSG00000137713.15	PPP2R1B	4.81221	5.42245	0.624281	0.00880384
chr16_53703799_53704199	7.70923	7.51734	-0.191892	0.00685485	0.994685	ENSG00000103494.13	RPGRIP1L	2.02784	2.45633	-0.460558	0.123589
chr8_100309906_100310306	7.45579	7.10675	-0.459341	-0.141485	0.866345	ENSG00000034677.12	RNF19A	3.19483	2.74248	-0.255588	0.226703
chr11_130916345_130916745	6.47032	5.99288	-0.562984	-0.305356	0.623103	ENSG00000120451.10	SNX19	2.08056	0.850397	-1.13593	0.00368446
chr1_212432693_212433093	7.46956	6.93962	-0.529939	-0.326744	0.627264	ENSG00000117691.9	NENF	6.66501	6.91632	0.274439	0.127523
chr3_184811903_184812303	5.82417	5.42014	-0.404028	-0.194873	0.793468	ENSG00000156931.15	VPS8	3.008	3.1584	0.25986	0.234054
chr11_61891525_61891925	6.15984	6.16542	-0.320013	0.199397	0.780547	ENSG00000221968.8	FADS3	5.98047	5.33901	-0.51198	0.0167062
chr2_157839228_157839628	4.24992	3.08603	-1.13772	-0.965202	0.174341	ENSG00000115170.13	ACVR1	1.83218	2.33166	0.495721	0.0817365
chr18_58581252_58581652	5.41626	4.87721	-0.833249	-0.32373	0.644559	ENSG00000198796.6	ALPK2	2.0792	0.574239	-2.0151	0.000838884
chr9_40992011_40992411	6.67154	5.97253	-0.699017	-0.482474	0.374347	ENSG00000276291.5	FRG1HP	2.34451	3.13479	0.810736	0.0587471
chr17_8118568_8118968	5.6152	5.79267	0.449355	0.389369	0.512032	ENSG00000179148.9	ALOXE3	-2.00579	-2.32918	-0.543037	0.505765
chr17_75109736_75110136	4.08176	4.97974	0.65938	1.02591	0.0485549	ENSG00000125449.6	ARMC7	3.55184	4.27048	0.665454	0.0142194
chr1_84479382_84479782	7.73812	7.71328	-0.0248409	0.178129	0.832167	ENSG00000117133.10	RPF1	6.18876	6.75802	0.585305	0.00896923
chr1_46247450_46247850	6.26256	6.58005	0.317497	0.512925	0.330894	ENSG00000085999.11	RAD54L	4.15603	4.14388	-0.056483	0.807477
chr13_37059526_37059926	7.1213	6.68398	-0.437321	-0.253297	0.717803	ENSG00000102710.19	SUPT20H	4.06897	3.26042	-0.762145	0.00777664
chr22_20268138_20268538	4.08856	4.08675	0.568181	0.167154	0.869819	ENSG00000040608.13	RTN4R	3.16937	2.9536	-0.214245	0.469204
chr7_45920762_45921162	5.51192	5.48893	-0.425807	0.161724	0.835855	ENSG00000146674.14	IGFBP3	4.48074	3.4396	-1.02774	0.00304242
chr11_9265191_9265591	4.83676	5.05025	0.213487	0.361465	0.598046	ENSG00000184014.7	DENND5A	5.7819	5.52128	-0.364868	0.047403
chrX_72181324_72181724	6.79511	6.47348	-0.32163	-0.0995824	0.906946	ENSG00000102309.12	PIN4	3.81083	4.12286	0.313987	0.192867
chr5_172983538_172983938	6.54472	6.55743	0.0127046	0.229584	0.745783	ENSG00000113732.8	ATP6V0E1	7.28958	7.98621	0.681035	0.00495974
chr22_42343482_42343882	2.69203	2.72917	0.0371489	0.0800538	0.969131	ENSG00000100207.18	TCF20	4.45369	3.69086	-0.983591	0.00394826
chr1_25247376_25247776	4.94356	5.4338	0.76395	0.671247	0.199639	ENSG00000117616.17	RSRP1	3.50277	3.76981	0.151588	0.559786
chr17_18363392_18363792	6.15712	6.48797	0.33085	0.507854	0.33116	ENSG00000176974.19	SHMT1	5.94492	5.75469	-0.172471	0.474668
chr14_34629951_34630351	5.40789	5.58852	0.180628	0.373669	0.542952	ENSG00000129515.18	SNX6	4.93004	4.77833	0.00865973	0.9671
chr8_143246659_143247059	6.28277	6.57083	0.288058	0.475261	0.378566	ENSG00000181638.17	ZFP41	2.10806	1.6641	-0.164237	0.567175
chr18_80108761_80109161	6.15074	6.04525	-0.105483	0.0682133	0.935974	ENSG00000101544.8	ADNP2	2.57381	2.06944	-0.260264	0.239582
chr16_48610021_48610421	5.57276	5.21662	-0.356144	-0.19972	0.789323	ENSG00000102921.7	N4BP1	3.56068	3.6129	-0.524738	0.0275425
chr17_28405785_28406185	4.27636	4.47029	0.193934	0.396673	0.601236	ENSG00000076351.12	SLC46A1	4.16868	3.43959	-0.595797	0.0133494
chr17_66302348_66302748	5.6757	5.41007	-0.26563	-0.158431	0.835855	ENSG00000154229.11	PRKCA	3.40736	3.43756	-0.0108212	0.958256
chr9_22447163_22447563	6.5458	6.04496	-0.500842	-0.277983	0.673808	ENSG00000176399.3	DMRTA1	-2.38208	-1.72899	1.15585	0.103487
chr6_36594075_36594475	6.2679	6.73383	0.465925	0.677304	0.165763	ENSG00000112081.16	SRSF3	8.45895	8.69781	0.355243	0.0456246
chr19_51366328_51366728	5.72708	5.66268	-0.0621759	0.138281	0.861055	ENSG00000105379.9	ETFB	7.15664	6.68559	-0.451621	0.0257607
chr12_122064009_122064409	6.52009	6.80922	0.289128	0.492232	0.369374	ENSG00000256546.1	AC156455.1	3.34691	2.92364	-0.425859	0.258754
chr17_49994983_49995383	4.3889	3.81008	-0.578817	-0.362227	0.668194	ENSG00000064195.7	DLX3	-0.137457	-1.58568	-1.86856	0.0144184
chr19_57389611_57390011	6.04974	5.46334	-0.586408	-0.402258	0.484122	ENSG00000188785.11	ZNF548	0.957244	1.12504	0.258781	0.483175
chr9_131739888_131740288	4.12969	4.25115	0.121458	0.187207	0.846566	ENSG00000107263.18	RAPGEF1	3.63105	4.22142	0.645569	0.00745684
chr1_23868175_23868575	3.58831	4.32285	0.734541	0.822797	0.205991	ENSG00000179163.11	FUCA1	2.94986	3.36664	0.433553	0.107688
chr16_3717335_3717735	5.44188	5.55915	0.349193	0.296684	0.651275	ENSG00000126602.10	TRAP1	8.00462	8.00256	-0.0153027	0.93335
chr22_24555079_24555479	6.65245	6.88714	0.234686	0.441371	0.445927	ENSG00000138867.16	GUCD1	5.50953	4.77575	-0.758287	0.00363651
chr6_112087361_112087761	6.9482	6.72587	-0.222323	-0.0175416	0.985815	ENSG00000074935.13	TUBE1	3.05509	3.81493	0.719766	0.0179583
chr3_123286260_123286660	4.52444	4.72727	0.190449	0.397112	0.582108	ENSG00000173175.14	ADCY5	-1.52406	-1.90498	-0.806405	0.240582
chr1_218284983_218285383	7.74811	7.06162	-0.686491	-0.486859	0.412924	ENSG00000067533.5	RRP15	4.07708	4.46148	0.19333	0.29514
chrX_46759223_46759623	4.80097	4.39622	-0.404747	-0.242632	0.771812	ENSG00000065923.9	SLC9A7	1.13452	0.722916	-0.245225	0.403022
chr7_158704766_158705166	7.56702	7.52727	-0.0397487	0.15921	0.84989	ENSG00000146918.19	NCAPG2	3.94444	4.32237	0.339768	0.0759304
chr7_107563830_107564230	6.51364	6.08883	-0.424814	-0.204834	0.777964	ENSG00000105865.10	DUS4L	2.44169	2.68377	0.158162	0.60295
chr22_19171417_19171817	5.34054	5.34221	0.001668	0.189171	0.808404	ENSG00000260924.2	LINC01311	0.314083	0.0557828	-0.262742	0.649548
chr9_106863150_106863550	4.54213	4.23349	-0.308646	-0.0972069	0.925456	ENSG00000148143.12	ZNF462	-1.16967	-1.09748	-1.2771	0.0530223
chr6_73461545_73461945	6.12478	6.08883	-0.035949	0.182444	0.805098	ENSG00000135297.15	MTO1	4.46921	4.43809	0.0143104	0.948905
chr5_127030482_127030882	8.11844	7.58612	-0.532315	-0.346184	0.624225	ENSG00000173926.5	2023-03-03	-0.338921	-0.972819	-0.187609	0.800206
chr8_53944983_53945383	7.52804	6.69643	-0.621143	-0.607847	0.261414	ENSG00000147509.13	RGS20	2.228	2.75872	0.109294	0.776149
chr14_21103829_21104229	6.76364	6.93146	0.167827	0.39947	0.516674	ENSG00000165804.15	ZNF219	4.33979	4.54448	0.316351	0.0951431
chr1_32222180_32222580	5.2452	5.16353	-0.0816774	0.116222	0.894902	ENSG00000084623.11	EIF3I	8.02463	8.73281	0.729309	0.003405
chr3_113746143_113746543	6.34461	6.44362	0.0990094	0.303462	0.633906	ENSG00000121579.12	NAA50	6.71644	7.3472	0.574849	0.0107599
chr1_62783727_62784127	7.69972	7.69234	-0.00738614	0.181786	0.826495	ENSG00000125703.14	ATG4C	3.73746	3.33967	-0.279298	0.212974
chr6_43687594_43687994	5.30373	5.24797	-0.0557655	0.158516	0.848645	ENSG00000096080.11	MRPS18A	6.43734	6.7504	0.332082	0.0772312
chr17_32349902_32350302	5.2257	5.70248	0.47678	0.65995	0.186412	ENSG00000010244.18	ZNF207	6.70282	6.81394	0.13396	0.459579
chr6_3063655_3064055	6.81996	6.67478	-1.04286	0.0504022	0.956296	ENSG00000137275.13	RIPK1	3.87892	3.13814	-0.739517	0.00590785
chr15_55408248_55408648	7.98595	7.47704	-0.508905	-0.313041	0.661976	ENSG00000260916.7	CCPG1	3.24159	2.95725	-0.396168	0.0799256
chr12_93441931_93442331	8.01488	7.75398	-0.260902	-0.0667795	0.94612	ENSG00000177889.9	UBE2N	6.67957	7.04133	0.444856	0.0213898
chr6_31806747_31807147	5.37489	5.56996	0.195073	0.375321	0.539286	ENSG00000204392.10	LSM2	6.59824	7.26141	0.675569	0.00863641
chr2_223957142_223957542	6.06755	6.23953	0.171979	0.334096	0.579438	ENSG00000135900.3	MRPL44	4.94397	5.45761	0.528946	0.0167188
chr6_108074588_108074988	6.2324	6.75423	0.521828	0.725153	0.127035	ENSG00000081087.14	OSTM1	3.3403	3.00096	-0.076164	0.763503
chr3_111674387_111674787	7.62663	7.08212	-0.247138	-0.34537	0.605604	ENSG00000240891.7	PLCXD2	-0.195785	-0.236165	-0.036682	0.940685
chr17_57995423_57995823	3.90851	4.35624	0.447732	0.663527	0.322887	ENSG00000264112.1	AC015813.1	0.322712	0.411385	0.0224506	0.960969
chr3_146161006_146161406	8.44096	7.63958	-1.03555	-0.601495	0.313982	ENSG00000152952.11	PLOD2	5.80975	4.45308	-1.27518	0.001915
chrX_154097643_154098043	6.24768	6.28402	0.116701	0.241668	0.723695	ENSG00000169057.21	MECP2	5.13653	6.26398	0.0505182	0.768745
chr9_104831633_104832033	4.5791	3.17454	-1.40456	-1.18376	0.0517728	ENSG00000165029.15	ABCA1	-0.959058	-2.22741	-1.8868	0.00487722
chr11_62672214_62672614	4.48424	4.73453	0.250287	0.492696	0.473497	ENSG00000162194.12	LBHD1	2.94625	2.61851	-0.393942	0.155499
chr15_65286703_65287103	6.0272	5.71556	-0.31164	-0.132226	0.865435	ENSG00000138617.15	PARP16	2.59097	3.07859	0.543248	0.0547021
chr6_41735454_41735854	5.72305	5.80735	-0.167055	0.270068	0.681443	ENSG00000112561.17	TFEB	3.32495	3.06931	-0.418427	0.134821
chr8_42207539_42207939	3.91573	3.74734	-0.0054991	0.0732269	0.954015	ENSG00000104368.17	PLAT	2.35691	1.76078	-0.456259	0.116035
chr14_37197753_37198153	6.48582	5.93472	-0.551103	-0.352693	0.556457	ENSG00000151338.18	MIPOL1	1.46701	1.79205	0.447932	0.240613
chr1_26787857_26788257	4.6758	5.06538	0.38958	0.502285	0.41302	ENSG00000060642.10	PIGV	2.41832	2.07909	-0.0965135	0.75219
chr11_112073999_112074399	5.58118	4.92428	-0.656901	-0.464062	0.436827	ENSG00000150773.10	PIH1D2	1.1151	0.455443	-0.492339	0.426837
chr1_116109666_116110066	6.71042	5.85473	-1.07139	-0.611976	0.232376	ENSG00000173212.4	MAB21L3	-0.473931	-1.84112	-2.16122	0.0105958
chr15_68277728_68278128	6.84142	6.63829	-0.203128	-0.0316562	0.973175	ENSG00000169018.5	FEM1B	3.75346	4.31472	0.3081	0.0924733
chr12_47820590_47820990	6.6181	6.52465	-0.0934532	0.152022	0.850226	ENSG00000061273.17	HDAC7	5.20189	5.55146	0.309295	0.0733734
chr6_142146997_142147397	7.0814	6.68671	-0.394684	-0.215953	0.767291	ENSG00000009844.15	VTA1	4.29704	4.67755	0.3483	0.0964531
chr17_31487657_31488057	5.58414	5.96002	0.375878	0.545104	0.284691	ENSG00000131242.17	RAB11FIP4	2.43449	1.72928	-1.11948	0.0124805
chr22_24270595_24270995	6.06116	6.63038	0.569215	0.768527	0.0957684	ENSG00000100014.19	SPECC1L	3.73271	3.72242	0.0944607	0.64388
chr22_20507378_20508133	5.01711	5.81127	0.318241	0.986358	0.0268423	ENSG00000099917.17	MED15	5.30144	4.80378	-0.408105	0.0474316
chr3_15065097_15065497	5.98991	6.00808	0.385591	0.231941	0.736521	ENSG00000131368.7	MRPS25	6.45634	6.93393	0.421307	0.0285636
chr22_21867529_21867929	5.45216	5.80001	0.34785	0.549381	0.294568	ENSG00000100030.14	MAPK1	5.75326	5.80468	-0.170235	0.272629
chr21_36698887_36699287	5.34068	5.06536	-0.275323	-0.0234485	0.982795	ENSG00000159263.15	SIM2	2.22341	2.59598	0.282808	0.33084
chr7_35800875_35801275	8.03903	7.85769	-0.181346	0.00950945	0.99253	ENSG00000122545.19	2023-09-07	6.20899	6.39479	0.193654	0.250072
chr15_50120721_50121121	3.2468	2.80831	-0.0872692	-0.197299	0.907327	ENSG00000104043.14	ATP8B4	1.04988	0.174569	-1.00839	0.0172825
chr17_42458601_42459001	5.15846	5.4505	0.339172	0.461415	0.428623	ENSG00000033627.16	ATP6V0A1	4.40396	4.78568	0.333699	0.0708486
chr22_38705414_38705814	6.97102	7.2953	0.324279	0.534793	0.339385	ENSG00000100226.15	GTPBP1	4.28444	4.38941	0.147798	0.400869
chr7_4973814_4974214	5.83532	6.05349	0.218172	0.410442	0.468348	ENSG00000196204.11	RNF216P1	4.60805	5.4611	0.896521	0.00289449
chr16_4416510_4416910	5.56776	6.13096	0.567421	0.776433	0.0930112	ENSG00000103426.12	CORO7-PAM16	-3.32193	-1.69645	7.30059	0.00601522
chr15_67542475_67542875	4.37469	4.86872	0.494039	0.686907	0.246454	ENSG00000137764.19	MAP2K5	3.65839	3.68826	0.0535501	0.828368
chr2_144517449_144517849	6.41716	5.69397	-0.60153	-0.494123	0.361151	ENSG00000169554.19	ZEB2	0.977005	-0.687786	-1.68525	0.00432533
chr19_45642278_45642678	5.21805	5.76434	0.529417	0.730662	0.131103	ENSG00000125746.16	EML2	5.8067	4.84495	-0.918586	0.00505446
chr16_54930522_54930922	6.94569	6.26508	-0.680609	-0.491798	0.366214	ENSG00000176842.14	IRX5	2.37136	2.61452	0.28339	0.289913
chr6_37222547_37222947	6.65244	6.81671	0.164265	0.362922	0.556154	ENSG00000172738.11	TMEM217	1.2806	1.61168	0.441906	0.431095
chr20_44398303_44398703	4.36048	3.75248	-0.608001	-0.379795	0.653495	ENSG00000101076.16	HNF4A	-1.32918	-0.902956	0.191482	0.787694
chr21_33641658_33642058	7.56022	7.5521	0.284647	0.18749	0.816533	ENSG00000205758.11	CRYZL1	4.28315	4.82556	0.518626	0.0405741
chr17_75087613_75088013	6.62327	6.53881	-0.0844635	0.108239	0.89602	ENSG00000170190.15	SLC16A5	3.9023	3.72753	-0.0775905	0.750705
chr22_20016681_20017081	5.21958	5.44875	0.225192	0.392155	0.522694	ENSG00000099889.13	ARVCF	2.80111	2.80526	0.203752	0.392163
chr1_95072495_95072895	7.69362	7.27717	-0.41645	-0.218109	0.779374	ENSG00000172339.9	ALG14	2.63989	3.62577	0.752512	0.0113383
chr11_66510422_66510822	4.70786	4.94811	0.240249	0.464799	0.48612	ENSG00000174483.19	BBS1	3.38266	3.51338	0.0411414	0.868177
chr14_73490890_73491290	5.45504	5.70438	0.24934	0.473175	0.405349	ENSG00000170468.7	RIOX1	3.66217	3.86234	0.212684	0.307377
chr16_57735391_57735791	7.08416	7.11989	0.0357266	0.228075	0.758603	ENSG00000140854.12	KATNB1	5.24274	5.00432	-0.150429	0.390751
chr17_21551386_21551786	5.9563	6.21694	-0.330801	0.480883	0.374347	ENSG00000212719.11	C17orf51	3.19982	3.60834	0.694551	0.00843409
chr16_83898895_83899295	5.88713	5.22045	-0.666684	-0.489369	0.369712	ENSG00000103150.5	MLYCD	0.432326	0.69161	0.105074	0.718765
chr2_203327973_203328373	6.01746	5.46305	-0.554408	-0.36062	0.549189	ENSG00000138443.15	ABI2	4.81482	5.4632	0.229099	0.245148
chr6_150025408_150025808	4.59977	3.86986	-0.729908	-0.514868	0.476546	ENSG00000155918.7	RAET1L	-1.10345	-0.336731	0.836183	0.310757
chr17_4948809_4949209	5.44696	6.06682	0.619859	0.820945	0.0698151	ENSG00000108515.17	ENO3	6.7347	5.37881	-1.40281	0.00323487
chr11_59106863_59107263	6.83234	5.98756	-0.844782	-0.660314	0.172299	ENSG00000189057.10	FAM111B	0.680323	-0.110475	-0.906991	0.0347962
chr22_41688633_41689033	4.67753	5.26684	0.63463	0.807678	0.128098	ENSG00000100138.14	SNU13	8.55578	8.96908	0.490602	0.0132123
chr6_124961910_124962310	6.46059	5.37982	-1.2374	-0.871474	0.0492157	ENSG00000146373.16	RNF217	2.01024	2.61086	0.234065	0.344418
chr7_23597180_23597580	6.78529	6.39773	-0.387558	-0.169831	0.824674	ENSG00000169193.11	CCDC126	1.7239	2.0582	0.421403	0.25358
chr17_81860630_81861030	7.08527	7.49287	0.407601	0.594989	0.272639	ENSG00000185624.14	P4HB	9.29867	9.03046	-0.343746	0.038994
chr1_2391495_2391895	6.06221	6.22399	0.161783	0.343577	0.566244	ENSG00000116151.13	MORN1	2.51725	2.54249	-0.0449899	0.892538
chr8_96261408_96261808	7.85215	7.4367	-0.415443	-0.225655	0.772791	ENSG00000156469.8	MTERF3	3.97762	4.56648	0.612433	0.0218002
chr10_37857533_37857933	7.74063	7.38496	-0.355665	-0.146843	0.864814	ENSG00000198105.13	ZNF248	2.24343	2.16923	0.295509	0.320498
chr13_30617556_30617956	6.5269	6.7107	0.183799	0.398376	0.50475	ENSG00000132952.11	USPL1	1.64948	1.79521	0.206479	0.43826
chr12_109312201_109312601	5.20334	3.32596	-1.12619	-1.69417	0.000822198	ENSG00000139445.17	FOXN4	1.02277	-0.338921	-1.43147	0.00869193
chr7_36152815_36153215	8.57869	8.47023	-0.474269	0.0846956	0.93531	ENSG00000122547.10	EEPD1	-0.679227	-0.265995	1.84687	0.0246573
chr22_23145164_23145564	4.44112	4.89654	0.455419	0.635394	0.288527	ENSG00000100228.12	RAB36	-2.00463	-1.23536	1.27194	0.0800892
chr22_21001889_21002289	6.12826	6.13765	0.00939205	0.206371	0.770468	ENSG00000184436.11	THAP7	5.38301	5.12685	-0.254569	0.191044
chr10_112446733_112447133	6.76299	6.55854	-0.204453	-0.00345691	0.997002	ENSG00000023041.11	ZDHHC6	4.34974	5.04757	0.660053	0.00822796
chr1_213051088_213051488	7.82794	7.32108	-0.49244	-0.311613	0.658959	ENSG00000136643.11	RPS6KC1	3.73034	3.87962	0.185673	0.299391
chr6_31399680_31400080	5.64728	5.85104	0.230455	0.388442	0.504153	ENSG00000204520.12	MICA	5.85663	6.45568	0.599975	0.0161549
chr9_129570555_129570955	4.43431	3.63704	-0.797274	-0.553492	0.463226	ENSG00000227619.1	AL391056.1	-0.760385	-1.65094	-1.14444	0.103487
chr12_51217959_51218359	5.66716	5.69021	0.0230454	0.205743	0.77399	ENSG00000184271.17	POU6F1	2.74082	2.18704	-0.473798	0.111009
chr15_75712637_75713037	4.86854	4.2396	0.329587	-0.412846	0.572601	ENSG00000173546.7	CSPG4	4.69007	2.93641	-1.75945	0.00057166
chr3_132417308_132417708	7.9937	7.56145	-0.432252	-0.226069	0.777698	ENSG00000138246.16	DNAJC13	2.69727	2.24459	-0.542361	0.0477366
chr9_21559646_21560046	6.82173	6.32851	-0.493215	-0.299322	0.642585	ENSG00000171889.3	MIR31HG	0.292962	0.573718	0.350513	0.619077
chr12_28190599_28190999	7.6225	7.00998	-0.612521	-0.40616	0.52156	ENSG00000247934.4	AC022364.1	-0.737166	-1.27144	-0.105307	0.888577
chr17_82418307_82418707	5.41103	6.10752	0.696498	0.856043	0.0500244	ENSG00000169660.16	HEXDC	3.31412	3.35551	0.0910834	0.733258
chr8_22668936_22669336	5.1272	5.03834	-0.278397	0.159941	0.856895	ENSG00000147439.12	BIN3	3.69412	3.85404	0.214734	0.393563
chr12_122203371_122203771	4.57807	4.41376	-0.164317	-0.0160799	0.988699	ENSG00000176383.8	B3GNT4	-0.629213	-0.179227	0.598884	0.342755
chr1_27772954_27773354	5.60744	5.75222	0.144774	0.332054	0.592928	ENSG00000117758.13	STX12	2.42093	2.97861	0.602216	0.0300334
chr15_50908381_50908781	5.43507	5.25807	-0.177008	-0.00619589	0.995032	ENSG00000081014.10	AP4E1	1.22151	0.923818	-0.243478	0.50854
chr2_174248446_174248846	7.25248	7.03695	-0.215532	-0.00725662	0.993918	ENSG00000138430.15	OLA1	6.44014	6.7365	0.305975	0.10651
chr19_39031423_39031823	5.73158	5.87765	0.146066	0.337385	0.580784	ENSG00000161243.8	FBXO27	3.08129	2.38091	-0.523901	0.0905887
chr20_34955662_34956062	5.9029	5.85196	0.431199	0.145917	0.849572	ENSG00000100983.10	GSS	6.25177	6.82609	0.552721	0.0121308
chr17_50095032_50095432	5.63766	5.7896	0.0471335	0.361257	0.55333	ENSG00000005882.11	PDK2	5.07975	4.57814	-0.474559	0.0710592
chr19_45496950_45497350	5.00657	5.12477	0.0495401	0.296506	0.679913	ENSG00000125744.11	RTN2	3.62311	3.04305	-0.474178	0.217338
chr1_20588822_20589222	4.26639	4.47995	0.213561	0.381208	0.617142	ENSG00000158825.5	CDA	5.86809	3.92691	-1.93746	0.00057166
chr4_18021868_18022268	8.51067	7.88323	-0.627444	-0.430756	0.532286	ENSG00000178177.15	LCORL	0.755481	2.19856	0.402517	0.206174
chr4_168318361_168318761	6.44541	5.69517	-1.05584	-0.570741	0.252537	ENSG00000137628.16	DDX60	1.29647	0.544749	-1.55464	0.00212137
chr14_76151691_76152091	5.9625	5.92249	-0.0400063	0.156043	0.837258	ENSG00000089916.17	GPATCH2L	1.88473	2.27318	-0.00407628	0.988065
chr17_50345830_50346230	4.50194	5.1042	0.602251	0.732558	0.180743	ENSG00000015532.9	XYLT2	4.4268	4.03862	-0.407432	0.0434793
chr3_13548882_13549282	6.07637	5.8385	-0.237869	-0.0597968	0.94498	ENSG00000163520.13	FBLN2	6.73862	6.15975	-0.571655	0.0066032
chr10_22320799_22321199	5.93241	5.66592	-0.444567	-0.0659323	0.939946	ENSG00000168283.13	BMI1	3.88182	3.96938	0.249011	0.204196
chr7_73738826_73739226	6.38833	6.82592	0.437585	0.657156	0.187693	ENSG00000106077.18	ABHD11	3.68882	2.92369	-0.76527	0.0243986
chr12_116277561_116277961	5.61713	5.61666	0.180108	0.19521	0.791264	ENSG00000123066.8	MED13L	3.34864	2.63595	-0.814634	0.00710713
chr10_68955951_68956351	5.93138	5.98246	0.0510771	0.268591	0.686208	ENSG00000165732.12	DDX21	6.23248	6.26444	0.0412741	0.831345
chr10_125896246_125896646	5.55199	5.34169	-0.210302	-0.0254796	0.979338	ENSG00000089876.11	DHX32	4.26233	4.00621	-0.1689	0.361019
chr17_28711198_28711598	5.26275	5.68756	0.424806	0.628536	0.222754	ENSG00000167525.13	PROCA1	0.494097	0.41391	-0.29674	0.692447
chr16_70801013_70801413	5.98407	6.21089	-0.0857177	0.413235	0.46403	ENSG00000103043.14	VAC14	4.95873	5.07846	0.0455726	0.804837
chr4_39366151_39366551	4.22121	4.20305	-0.0181556	0.130553	0.898458	ENSG00000035928.15	RFC1	4.16896	4.3954	-0.0175767	0.931562
chr19_1402761_1403161	5.44005	4.64631	-0.393755	-0.555343	0.359441	ENSG00000130005.12	GAMT	7.12861	6.63014	-0.517675	0.0148478
chr3_39147010_39147410	6.75815	6.13267	-0.625483	-0.443705	0.424348	ENSG00000284669.1	AC092053.3	-1.48289	-2.23697	-1.21963	0.0822244
chr2_45611115_45611515	6.47076	6.71511	0.244352	0.439937	0.438946	ENSG00000068784.12	SRBD1	1.90767	1.39116	-0.647927	0.0455489
chr21_17819278_17819678	6.21157	6.19695	-0.014622	0.166128	0.822946	ENSG00000154642.10	C21orf91	0.0385531	1.44726	0.87203	0.0598023
chr1_156725796_156726196	4.53279	5.38499	0.852196	1.06325	0.0284242	ENSG00000143319.16	ISG20L2	5.92973	6.13864	0.335441	0.0499309
chr2_27370265_27370665	6.98526	7.13627	0.151012	0.353247	0.582495	ENSG00000115211.15	EIF2B4	5.35933	5.4851	0.158515	0.391858
chr16_57628196_57628596	6.68021	5.48082	-1.82166	-0.964687	0.0277251	ENSG00000205336.11	ADGRG1	4.86729	3.79723	-0.977344	0.00217441
chr20_38472553_38472953	6.61582	6.54921	-0.0666122	0.12647	0.874854	ENSG00000170471.14	RALGAPB	3.72619	3.62139	-0.20726	0.265536
chr2_138501541_138501941	7.38029	6.92546	-0.454826	-0.252395	0.726636	ENSG00000144228.8	SPOPL	0.996837	2.43324	1.37318	0.00206256
chr17_50055697_50056097	5.66664	6.20675	-0.253432	0.745983	0.107286	ENSG00000005884.17	ITGA3	6.35362	5.44239	-0.912519	0.0170721
chr16_81096325_81096725	7.37546	7.40567	0.030216	0.224554	0.768502	ENSG00000140905.10	GCSH	6.1256	6.21366	0.0944727	0.616455
chr4_55346120_55346520	6.46286	5.87117	-0.623916	-0.367956	0.540665	ENSG00000128039.10	SRD5A3	3.81563	3.22032	-0.688518	0.0217056
chr19_39846223_39846623	4.24828	4.85127	0.602991	0.826194	0.150385	ENSG00000105202.8	FBL	8.64205	8.89273	0.271877	0.126142
chr9_133992725_133993125	4.58946	4.9065	0.0560984	0.422898	0.529997	ENSG00000160293.16	VAV2	4.19234	4.07779	-0.107271	0.565218
chr14_20683128_20683528	4.81277	5.37939	0.120134	0.801274	0.127408	ENSG00000258818.3	RNASE4	0.422233	-0.973931	-1.57026	0.0365273
chr19_13162848_13163248	7.15158	6.82461	-0.326964	-0.124436	0.882194	ENSG00000213253.5	RPL12P42	0.800515	0.401903	-0.209617	0.813378
chr16_69186915_69187315	4.52559	5.18856	0.662969	0.823229	0.115878	ENSG00000168807.16	SNTB2	2.3862	2.89917	0.174729	0.3582
chr2_130836657_130837057	6.05465	5.53701	-0.517643	-0.309727	0.625311	ENSG00000136002.18	ARHGEF4	3.85927	4.21551	0.277676	0.172801
chr11_76860624_76861024	7.25136	7.06639	-0.739964	0.0246649	0.98086	ENSG00000078124.11	ACER3	2.3501	3.75883	0.299879	0.273358
chrX_65667430_65667830	6.6251	6.30718	-0.980133	-0.121607	0.880191	ENSG00000147065.16	MSN	7.78761	6.69462	-1.07955	0.00831135
chr11_819357_819757	5.43894	5.68644	0.247502	0.454151	0.427354	ENSG00000177666.16	PNPLA2	5.16694	5.10945	-0.129937	0.502559
chr10_12129354_12129754	7.06642	7.50445	0.43803	0.642502	0.226181	ENSG00000065665.20	SEC61A2	2.12527	2.85067	0.837103	0.0162286
chr5_93582848_93583248	7.06922	6.59809	-0.51567	-0.292857	0.657917	ENSG00000175745.12	NR2F1	3.76912	3.45219	-0.371941	0.115218
chr19_36489315_36489715	6.36096	6.23583	-0.125126	0.0753841	0.929427	ENSG00000186017.14	ZNF566	1.42989	2.32287	0.759708	0.0400807
chr1_147172468_147172868	7.09279	6.97882	-0.113975	0.0966354	0.911725	ENSG00000131791.7	PRKAB2	2.90241	3.62092	0.733647	0.00580993
chr8_58067624_58068024	6.25541	4.97717	-0.60586	-1.02508	0.0234362	ENSG00000169122.11	FAM110B	0.937103	1.26283	0.42422	0.296365
chr15_65029385_65029785	5.28423	5.39312	0.0380041	0.286231	0.67565	ENSG00000103707.9	MTFMT	4.26195	4.32604	-0.0483093	0.848622
chr14_57390290_57390690	6.60901	5.83844	-0.770572	-0.561538	0.27087	ENSG00000139977.13	NAA30	1.92784	2.66346	0.595645	0.0294983
chr1_108660974_108661374	7.38042	7.60697	0.226553	0.430141	0.495076	ENSG00000162639.15	HENMT1	5.72061	6.2795	0.538286	0.025256
chr18_51197743_51198143	7.86532	7.3465	-0.51882	-0.317243	0.651949	ENSG00000176624.10	MEX3C	2.58942	3.0463	0.58287	0.0296387
chr11_61332953_61333353	6.2992	6.27114	0.365889	0.188259	0.797886	ENSG00000149476.15	TKFC	5.83895	5.98965	0.0721428	0.696621
chr15_31870570_31870970	5.53332	5.37551	-0.157806	0.016131	0.987018	ENSG00000169918.9	OTUD7A	-0.715254	-2.14668	-0.920909	0.113792
chr1_186680145_186680545	6.0112	5.61588	-0.395327	-0.234629	0.728674	ENSG00000073756.11	PTGS2	-1.55639	-1.88208	-0.651502	0.382859
chr2_105337267_105337667	6.11751	6.11732	-0.00018793	0.194456	0.785752	ENSG00000135974.9	C2orf49	3.45211	4.10979	0.424932	0.0925324
chr17_4142950_4143350	5.56927	6.36057	0.791304	0.991888	0.0195092	ENSG00000074755.14	ZZEF1	3.52029	2.94003	-0.456914	0.100838
chr19_57320251_57320651	5.84267	5.70809	-0.134582	0.0686337	0.937386	ENSG00000178229.7	ZNF543	0.420302	0.855197	0.475123	0.184876
chr5_43121275_43121675	9.44693	9.06955	-0.54879	-0.165401	0.876643	ENSG00000172262.11	ZNF131	4.99549	5.25225	0.344649	0.0958788
chr1_153566488_153566888	6.99888	6.86302	-0.187137	0.0598792	0.948227	ENSG00000196754.10	S100A2	3.29517	3.08999	-0.31537	0.370804
chr12_8949717_8950117	8.21602	7.99503	-0.220984	-0.0166621	0.988293	ENSG00000003056.7	M6PR	7.18308	6.27658	-0.967384	0.00161459
chr6_117602376_117602776	7.98858	7.49767	-0.289865	-0.303774	0.674755	ENSG00000047932.13	GOPC	3.21053	2.6742	-0.52935	0.0321389
chr1_44632095_44632495	5.37491	5.35765	0.164047	0.189182	0.808822	ENSG00000187147.17	RNF220	6.31055	6.27882	0.0236973	0.90179
chr7_44885481_44885881	6.63113	6.69303	0.0619003	0.23662	0.733448	ENSG00000146676.8	PURB	2.30639	2.5015	0.207591	0.252391
chr15_63833755_63834155	5.88442	6.0566	0.172179	0.348628	0.557798	ENSG00000103657.13	HERC1	4.78196	4.40498	-0.666118	0.0106037
chr1_224330256_224330656	6.68128	6.53441	-0.255338	0.0656331	0.941539	ENSG00000143748.17	NVL	5.2726	5.60933	0.409016	0.0357619
chr19_17405465_17405865	5.13742	5.23136	0.0939393	0.265357	0.714937	ENSG00000130303.12	BST2	8.5184	8.30895	-0.193187	0.220718
chr15_74460993_74461393	6.17999	6.26946	-0.0687165	0.262461	0.688021	ENSG00000138629.15	UBL7	6.16111	5.99604	-0.195801	0.257011
chr12_112409432_112409832	5.15981	5.08975	-0.0700625	0.135574	0.876748	ENSG00000089009.15	RPL6	10.8097	10.7499	-0.0387579	0.808679
chr6_119349576_119349976	5.78835	4.7728	-1.01555	-0.812227	0.0981029	ENSG00000111885.6	MAN1A1	1.06004	-0.409162	-1.60986	0.00273173
chr17_48908179_48908579	5.53643	5.82207	-0.170894	0.501007	0.357213	ENSG00000159202.17	UBE2Z	5.86342	6.15371	0.318263	0.0572516
chr22_28883230_28883630	5.55511	6.49024	0.935133	1.10736	0.00699873	ENSG00000183579.15	ZNRF3	3.09929	3.59965	0.571322	0.0165839
chr12_6867316_6867716	6.1778	5.94111	-0.236689	-0.0428536	0.961884	ENSG00000111669.14	TPI1	10.8589	11.0299	0.193623	0.210152
chr9_120580018_120580418	7.26323	6.74871	-0.852321	-0.318814	0.629272	ENSG00000136861.17	CDK5RAP2	3.55636	2.88373	-0.848767	0.00572247
chrX_150689064_150689464	7.06726	6.03641	-0.510251	-0.785649	0.102204	ENSG00000063601.16	MTMR1	4.33963	3.95947	-0.328776	0.0851553
chr19_55280033_55280433	5.76426	5.84441	0.080146	0.291087	0.653461	ENSG00000133265.10	HSPBP1	5.50226	6.08817	0.620789	0.00865332
chr2_226799609_226800009	5.88023	5.19105	-0.689177	-0.499108	0.365891	ENSG00000169047.5	IRS1	0.0488054	0.423998	-0.84938	0.0254015
chr9_113012065_113012465	2.32592	3.39316	1.06724	1.14364	0.276865	ENSG00000228623.6	ZNF883	-1.79018	-2.0909	-0.457656	0.591247
chr17_78187043_78187443	6.90637	7.13279	0.226415	0.421237	0.482181	ENSG00000167900.11	TK1	6.61523	5.88586	-0.708056	0.00580993
chr16_75464586_75464986	7.69958	7.33728	-0.362305	-0.153167	0.857166	ENSG00000166822.12	TMEM170A	3.3771	4.64144	0.690702	0.0133978
chr19_8361928_8362328	5.80444	5.96158	0.157138	0.348597	0.562843	ENSG00000167772.11	ANGPTL4	-1.305	-0.807644	0.695729	0.330673
chr11_74948998_74949398	6.92011	6.85224	-0.0678781	0.140645	0.862443	ENSG00000118363.11	SPCS2	6.73794	6.99914	0.151304	0.411653
chr2_230416012_230416412	5.62847	5.06047	-0.482986	-0.400359	0.510994	ENSG00000067066.16	SP100	3.69907	3.58075	-0.307776	0.222136
chr9_120868550_120868950	7.75667	7.73497	-0.442516	0.159875	0.8527	ENSG00000119403.14	PHF19	6.2533	6.39993	-0.102985	0.538969
chr5_78984548_78984948	6.79576	6.65891	-0.136849	0.0638374	0.943646	ENSG00000113273.16	ARSB	2.84253	1.79004	-1.34209	0.00158646
chr6_57961276_57961676	6.90706	6.41462	-0.492433	-0.295358	0.651949	ENSG00000215190.9	LINC00680	1.26611	1.7134	0.345849	0.359318
chr11_393378_393778	4.73212	4.95443	0.22231	0.413243	0.544064	ENSG00000184363.9	PKP3	5.54372	5.75756	0.215472	0.270015
chr19_27793323_27793723	7.86979	7.25161	0.224715	-0.395704	0.548242	ENSG00000261824.6	LINC00662	2.77379	2.96819	0.359005	0.282776
chrX_71068389_71068789	6.76609	6.25415	-0.511943	-0.27855	0.679499	ENSG00000147164.11	SNX12	5.50798	5.39541	-0.0292803	0.883124
chr1_16206536_16206936	6.19011	6.34729	0.157178	0.362789	0.543906	ENSG00000142632.16	ARHGEF19	3.39158	3.46932	-0.0152265	0.960481
chr17_62140867_62141267	6.08443	5.37857	-0.70586	-0.492793	0.364921	ENSG00000266066.1	POLRMTP1	3.23874	2.90861	-0.325958	0.123235
chr15_35545818_35546218	7.09578	6.78031	-0.315469	-0.12334	0.882263	ENSG00000134146.11	DPH6	3.16869	3.13511	0.161881	0.621125
chr17_82519418_82519818	5.94487	5.96423	0.019356	0.191734	0.788046	ENSG00000141568.20	FOXK2	5.40223	4.97491	-0.275266	0.137653
chr11_3091781_3092181	4.95628	5.62781	-0.280038	0.864135	0.06944	ENSG00000021762.19	OSBPL5	4.81984	3.27125	-1.32835	0.000815568
chr4_103076470_103076870	6.303	5.83947	-0.103116	-0.24223	0.724817	ENSG00000164038.14	SLC9B2	3.98642	4.50143	0.12825	0.553254
chr7_29684965_29685365	6.60492	6.45987	-0.145049	0.0731581	0.933939	ENSG00000225264.3	ZNRF2P2	1.72151	0.812401	-0.915496	0.251431
chr5_32444597_32444997	7.98953	7.51699	-0.866985	-0.269665	0.7215	ENSG00000056097.15	ZFR	5.26857	5.47347	0.0801256	0.640934
chr16_30896966_30897366	5.43229	5.57773	0.145435	0.337097	0.595366	ENSG00000150281.6	CTF1	0.418124	-0.0728027	-0.521368	0.328414
chr11_75562570_75562970	5.89643	5.6385	-0.282055	-0.0536292	0.952539	ENSG00000149257.14	SERPINH1	8.04237	7.89646	-0.132662	0.403775
chr1_12595851_12596251	6.68619	5.97818	-0.708015	-0.493518	0.359441	ENSG00000162496.8	DHRS3	4.70504	3.89097	-0.748078	0.00869193
chr12_15882156_15882556	8.43942	7.77776	-0.386546	-0.45496	0.499015	ENSG00000023734.10	STRAP	7.40816	7.95167	0.549824	0.00758588
chr5_177086742_177087142	6.21235	6.32682	0.114468	0.293209	0.64289	ENSG00000160867.14	FGFR4	4.79547	4.28465	-0.620393	0.0103036
chr17_56913922_56914322	6.92512	6.69036	-0.234754	-0.0219269	0.982622	ENSG00000121060.17	TRIM25	5.50564	5.51626	0.100499	0.55463
chr1_17237255_17237655	4.49935	4.24197	-0.257374	-0.0416162	0.970616	ENSG00000142623.10	PADI1	-1.28673	-0.871374	0.295211	0.697155
chr5_111092151_111092551	7.23083	6.62007	-0.610765	-0.405086	0.503481	ENSG00000134987.11	WDR36	4.22223	5.1761	0.851937	0.00292231
chr1_228139834_228140234	7.84567	7.90264	0.0569636	0.26033	0.736521	ENSG00000143774.16	GUK1	7.98462	8.07728	0.122107	0.421049
chr8_37762363_37762763	6.19852	5.82024	-0.378282	-0.175599	0.812742	ENSG00000147471.11	PLPBP	3.94382	4.11696	0.389244	0.100353
chr10_73997711_73998111	7.79083	8.14764	0.356814	0.560225	0.355239	ENSG00000035403.17	VCL	6.35341	6.06153	-0.30321	0.0846987
chr2_73887890_73888290	4.3601	3.45751	-0.902589	-0.696934	0.331542	ENSG00000163017.13	ACTG2	0.437103	-1.51163	-2.50775	0.015773
chr6_20212355_20212755	8.4942	7.51052	-0.98368	-0.77846	0.156333	ENSG00000172197.10	MBOAT1	2.43953	2.54368	0.123634	0.69508
chr3_11272118_11272518	6.00218	6.38222	0.380037	0.578176	0.247466	ENSG00000197548.12	ATG7	4.92021	5.17565	0.217809	0.241606
chr17_64506244_64506644	7.26948	7.34875	0.079272	0.266933	0.710686	ENSG00000108654.14	DDX5	8.68261	8.35466	-0.0258261	0.882683
chrX_24464988_24465388	7.77018	7.18165	-1.03742	-0.392977	0.545249	ENSG00000067992.13	PDK3	3.48246	3.91344	0.32211	0.150652
chr1_51519035_51519435	6.19196	6.45353	0.520281	0.453911	0.408503	ENSG00000085832.16	EPS15	3.13969	2.3048	-0.752954	0.0104652
chr13_20902628_20903028	5.55306	5.6696	0.116546	0.290688	0.653632	ENSG00000132953.16	XPO4	2.19871	2.39657	0.10448	0.658318
chr12_50167314_50167714	7.30151	7.59918	0.29767	0.491275	0.407851	ENSG00000139624.12	CERS5	4.55675	4.77976	0.234936	0.207803
chr6_75284699_75285099	7.89147	7.65506	-0.479232	-0.0532933	0.957194	ENSG00000112697.15	TMEM30A	4.12727	4.07079	-0.309933	0.0971383
chr17_44829815_44830215	3.16327	3.8115	0.648229	0.802281	0.331662	ENSG00000182963.9	GJC1	3.66498	4.00608	-0.242065	0.233104
chr6_31777145_31777545	4.67346	3.69963	-0.973823	-0.758952	0.232001	ENSG00000204396.10	VWA7	0.266832	-0.661686	-1.00591	0.0886138
chr7_66740422_66740822	6.94383	6.21883	-0.539832	-0.503459	0.357029	ENSG00000154710.17	RABGEF1	3.9884	4.33198	0.111896	0.555848
chr19_41309942_41310342	3.31493	4.21382	0.898882	1.05236	0.106155	ENSG00000142039.3	CCDC97	4.16346	3.88459	-0.0814973	0.663354
chr10_11742242_11742642	6.22684	6.0935	-0.133336	0.053357	0.951951	ENSG00000134463.14	ECHDC3	4.48326	4.53039	-0.00833459	0.978088
chr4_139665744_139666144	4.93811	4.70349	-0.234621	-0.019336	0.986135	ENSG00000085871.8	MGST2	5.93027	5.72226	-0.199918	0.308481
chr20_58236941_58237341	4.06509	4.68748	0.13402	0.790675	0.179108	ENSG00000124224.16	PPP4R1L	1.49421	1.91071	0.234513	0.523168
chr12_3041512_3041912	4.69963	4.95478	0.255153	0.441669	0.506151	ENSG00000250899.3	AC125807.2	2.41302	1.67351	-0.743556	0.0239175
chr2_200864455_200864855	5.8426	6.12126	-0.27842	0.5021	0.348227	ENSG00000013441.15	CLK1	3.29768	3.44647	0.142187	0.583031
chr10_69179803_69180203	5.24676	5.45857	0.211808	0.415539	0.497474	ENSG00000156502.13	SUPV3L1	5.62105	6.63601	0.823352	0.00264755
chr9_112333510_112333910	6.98684	6.68947	-0.651001	-0.0850429	0.922542	ENSG00000119314.15	PTBP3	3.76701	3.38619	-0.223092	0.207984
chr4_112589168_112589568	2.94709	2.67476	-0.272329	-0.100435	0.959895	ENSG00000138658.15	ZGRF1	0.152489	0.783237	0.0946354	0.815061
chrX_40647387_40647787	5.85927	6.1883	0.329027	0.526284	0.307663	ENSG00000185753.12	CXorf38	3.28417	3.75835	0.25857	0.219374
chr19_41959223_41959623	4.86138	5.20497	0.401558	0.524893	0.375806	ENSG00000105404.10	RABAC1	5.8795	4.68046	-1.17025	0.00204604
chr7_134548912_134549312	6.07901	5.45799	0.131191	-0.410968	0.478713	ENSG00000227471.8	AKR1B15	-1.08471	-3.19041	-4.72586	0.00915926
chr12_110613870_110614270	6.30846	6.13437	-0.17409	0.0438339	0.961488	ENSG00000204852.15	TCTN1	4.45986	3.52782	-0.76274	0.0161376
chr6_30885811_30886211	5.14279	4.31113	-0.831663	-0.61001	0.321309	ENSG00000204580.13	DDR1	5.82788	5.11004	-0.622738	0.00584177
chr5_73498170_73498570	6.2275	6.04851	-0.178996	0.0252705	0.978572	ENSG00000145741.15	BTF3	9.61649	9.87379	0.28253	0.102757
chr7_27863883_27864283	4.93338	4.28338	0.128971	-0.444626	0.526208	ENSG00000153814.12	JAZF1	2.95242	1.64102	-1.29442	0.00293825
chr21_28885053_28885453	7.59133	7.16579	-0.397383	-0.221634	0.772428	ENSG00000156239.11	N6AMT1	2.21815	2.40451	0.190288	0.502272
chr15_49620767_49621167	6.51294	6.19482	-0.31812	-0.112895	0.889122	ENSG00000104047.14	DTWD1	3.75484	3.76942	-0.0536504	0.843493
chr22_42697666_42698066	5.86428	5.27265	0.0816251	-0.400916	0.497683	ENSG00000128274.16	A4GALT	3.66679	3.38539	-0.328107	0.221937
chr4_67701061_67701461	7.77507	7.09524	-0.679839	-0.487217	0.412185	ENSG00000033178.12	UBA6	3.18384	2.35912	-0.195656	0.434327
chr19_5978016_5978416	5.51313	5.93262	0.41949	0.578333	0.246454	ENSG00000031823.14	RANBP3	5.14688	5.70306	0.631755	0.0105875
chr21_41167834_41168234	6.06273	6.2277	-0.387491	0.363292	0.54108	ENSG00000182240.15	BACE2	7.89808	7.63654	-0.279991	0.117825
chr16_57486289_57486689	5.79898	5.74366	-0.0487623	0.136499	0.861417	ENSG00000125170.10	DOK4	3.88147	3.19061	-0.557326	0.0441517
chr1_26306486_26306886	4.97325	5.41443	0.441178	0.603779	0.261816	ENSG00000158062.20	UBXN11	4.19653	3.95415	-0.310646	0.144568
chr7_65373603_65374003	6.76661	6.50915	-0.257455	-0.0428545	0.963559	ENSG00000146757.13	ZNF92	0.580428	1.08848	0.534214	0.122635
chr19_21141764_21142164	6.02399	5.67684	-0.347155	-0.15485	0.840083	ENSG00000196705.8	ZNF431	0.871822	0.918204	0.203745	0.569741
chr6_37169782_37170182	6.97455	7.23181	0.257267	0.473728	0.418191	ENSG00000137193.13	PIM1	4.02174	4.02883	0.0751574	0.792436
chr20_63520515_63520915	5.23968	5.25816	0.0184812	0.233734	0.75863	ENSG00000125534.9	PPDPF	6.26535	5.87463	-0.447456	0.113734
chr9_137240850_137241250	7.34562	7.33401	-0.0116092	0.180509	0.821042	ENSG00000188229.5	TUBB4B	9.09316	8.95014	-0.130041	0.403245
chr16_82170093_82170493	6.70493	5.80127	-0.903651	-0.710536	0.131082	ENSG00000135698.9	MPHOSPH6	3.80514	4.04981	0.279417	0.281571
chr15_44426917_44427317	6.74846	6.62389	-0.12457	0.0858347	0.921067	ENSG00000137770.13	CTDSPL2	2.80212	3.22481	0.513985	0.0456258
chr19_40090567_40090967	5.1141	4.77821	-0.335883	-0.182342	0.82717	ENSG00000197782.14	ZNF780A	3.4845	3.5627	-0.00138688	0.996807
chr16_2969035_2969435	6.12979	6.34915	0.394151	0.427086	0.448799	ENSG00000127564.16	PKMYT1	5.4325	5.63112	0.280667	0.269908
chr7_54759070_54759470	7.22948	6.72351	-0.505965	-0.286449	0.676878	ENSG00000132432.13	SEC61G	7.97631	7.92209	-0.00990614	0.961964
chr5_108382235_108382635	8.15856	7.50012	-0.658436	-0.455692	0.482627	ENSG00000145743.15	FBXL17	1.61152	1.63216	0.603369	0.0461517
chr17_16419050_16419450	3.80881	3.80614	0.186711	0.227943	0.832139	ENSG00000187688.14	TRPV2	-0.583251	-0.849265	-0.250109	0.733913
chr19_48738822_48739222	4.33258	5.08372	0.66039	0.927828	0.0768097	ENSG00000105538.9	RASIP1	6.02458	6.15497	0.0706825	0.669767
chr6_83067509_83067909	5.73115	5.24499	-0.486152	-0.296237	0.654595	ENSG00000083097.14	DOP1A	-0.9255	-0.726226	0.0874661	0.88364
chr22_46150176_46150576	4.8453	4.63623	-0.209072	-0.0461517	0.964801	ENSG00000186951.16	PPARA	2.00449	1.85707	-0.84831	0.0086371
chr1_27154956_27155356	4.80749	5.13078	-0.828961	0.514711	0.399506	ENSG00000090020.10	SLC9A1	2.87975	3.30412	0.224256	0.27611
chr11_11842011_11842411	5.95956	6.23466	0.275104	0.491378	0.360026	ENSG00000170242.17	USP47	3.49282	3.99948	0.40508	0.062704
chr6_90587001_90587401	7.28423	6.52872	-0.755512	-0.549323	0.30967	ENSG00000135341.17	MAP3K7	3.01357	3.24008	0.0494467	0.823163
chr6_89638562_89638962	6.98717	6.65758	-0.329593	-0.12714	0.876756	ENSG00000083099.10	LYRM2	3.46307	3.03403	-0.208914	0.378017
chr17_29180225_29180625	4.80838	5.18908	0.238058	0.568848	0.328682	ENSG00000196535.16	MYO18A	4.75001	4.64797	-0.341191	0.0696393
chr16_89217406_89217806	4.7867	4.92084	0.134139	0.306676	0.680096	ENSG00000170100.13	ZNF778	2.65845	2.72666	0.245579	0.307213
chrX_154378817_154379217	7.99389	7.96266	-0.0312364	0.166555	0.848925	ENSG00000102119.10	EMD	7.1774	7.58939	0.407075	0.0426102
chr2_27134502_27134902	5.90572	6.23076	0.325043	0.523165	0.312361	ENSG00000138073.13	PREB	5.93567	6.01448	0.0570796	0.754864
chr12_53675989_53676389	6.39961	6.73544	0.335825	0.537847	0.306899	ENSG00000135390.18	ATP5MC2	9.57843	9.55543	0.04176	0.80332
chr13_21061434_21061834	6.03624	6.1551	0.118859	0.337122	0.584309	ENSG00000150457.8	LATS2	3.27318	3.8049	0.503149	0.0283143
chr12_12356868_12357268	6.92565	6.69709	-0.228551	-0.0257655	0.979012	ENSG00000165714.10	BORCS5	4.22418	3.83368	-0.508776	0.0832208
chr22_41301318_41301718	4.0862	4.52442	0.43822	0.612702	0.347905	ENSG00000100403.11	ZC3H7B	5.20023	5.57192	0.380971	0.0580013
chr17_56977847_56978247	5.89669	5.88018	-0.0165127	0.176348	0.811338	ENSG00000121064.12	SCPEP1	4.36567	4.14442	-0.240027	0.262322
chr12_6493719_6494119	7.06962	7.02994	-0.0396822	0.169436	0.832139	ENSG00000010292.12	NCAPD2	6.54423	6.06324	-0.47614	0.0133266
chr21_43776230_43776630	5.67552	5.44733	-0.228193	0.00156504	0.998849	ENSG00000160213.7	CSTB	6.73311	6.55168	-0.168966	0.270015
chr17_36601312_36601712	5.65138	5.35865	-0.292737	-0.0780039	0.930165	ENSG00000278619.4	MRM1	3.5294	3.81921	0.293988	0.200713
chrX_86047363_86047763	6.62475	5.98787	-0.636886	-0.452728	0.40733	ENSG00000188419.13	CHM	1.66825	1.39605	-0.304602	0.302304
chr15_89680517_89680917	4.59034	3.08416	-1.50618	-1.33168	0.0242197	ENSG00000166819.11	PLIN1	-0.5744	-0.212538	0.285548	0.630733
chr6_79234527_79234927	6.58385	6.24368	-0.340167	-0.141415	0.857184	ENSG00000118418.14	HMGN3	5.96462	5.94743	0.00568345	0.978775
chr15_41493458_41493858	4.25649	4.12385	-0.132643	0.0339399	0.977289	ENSG00000137825.10	ITPKA	0.777319	0.963986	0.0415385	0.948206
chr1_224113901_224114301	6.47981	6.63346	0.153652	0.360583	0.554517	ENSG00000143756.11	FBXO28	4.37554	5.1807	0.596797	0.00954198
chr15_43746162_43746562	5.70367	5.99807	0.294402	0.506544	0.341782	ENSG00000167004.12	PDIA3	8.59096	8.16126	-0.409441	0.0225806
chr17_10697421_10697821	7.27881	6.81416	-0.464644	-0.250137	0.728115	ENSG00000133028.11	SCO1	5.38589	5.94659	0.348577	0.0958069
chr20_44475662_44476062	4.82197	5.05538	0.233413	0.425892	0.518593	ENSG00000124120.10	TTPAL	3.24917	2.80257	-0.518569	0.0431003
chr2_27409450_27409850	6.65775	6.8469	0.189155	0.378934	0.531617	ENSG00000115241.10	PPM1G	7.56878	7.3975	-0.160455	0.292604
chr1_92080247_92080647	6.74008	6.60867	-0.131414	0.0821346	0.925129	ENSG00000189195.12	BTBD8	-1.7172	-1.49425	0.610543	0.40976
chr11_1153938_1154338	5.98927	5.39249	-0.59678	-0.404593	0.485059	ENSG00000215182.8	MUC5AC	1.90128	0.26917	-1.70959	0.0011412
chr5_176647147_176647547	7.25005	7.48532	0.235268	0.434573	0.484324	ENSG00000048140.17	TSPAN17	4.85625	5.16591	0.353371	0.0645495
chr20_45254504_45254904	4.97672	4.04487	-0.931846	-0.689473	0.267083	ENSG00000124107.5	SLPI	5.96329	4.76142	-1.16499	0.00386219
chr12_132828927_132829327	5.77132	5.96328	0.191961	0.407746	0.480612	ENSG00000090615.14	GOLGA3	4.19321	4.06522	-0.131342	0.558304
chr19_55674933_55675333	5.15577	5.4712	0.315428	0.534824	0.346857	ENSG00000063245.14	EPN1	6.252	6.59394	0.427085	0.0226709
chr17_76240699_76241099	4.16983	4.09298	-0.0768458	-0.0150958	0.990126	ENSG00000141576.15	RNF157	0.0379374	-0.26142	-0.835519	0.0854812
chr11_9758554_9758954	5.2838	5.61595	-0.136471	0.535967	0.325284	ENSG00000246273.7	SBF2-AS1	1.68787	1.56837	0.0200285	0.960481
chr3_12763284_12763684	6.74875	6.09896	-0.663967	-0.416876	0.476868	ENSG00000088726.15	TMEM40	1.02218	0.323358	-0.685806	0.227777
chr16_66933858_66934629	5.36623	5.40687	0.0406404	0.236609	0.744411	ENSG00000166595.11	CIAO2B	6.65844	7.03048	0.404991	0.0544095
chr2_10043503_10043903	6.63279	6.32208	-0.310715	-0.184942	0.799524	ENSG00000172059.10	KLF11	3.45994	3.28116	-0.0522431	0.803435
chr11_57426944_57427344	5.64281	4.97648	-0.666327	-0.443323	0.470533	ENSG00000134802.17	SLC43A3	8.36215	8.23701	-0.0768762	0.610521
chr1_63523241_63523641	8.24908	7.82615	-0.422928	-0.22025	0.790072	ENSG00000142856.16	ITGB3BP	5.9016	6.27271	0.373049	0.0889055
chr11_6234637_6235037	9.64284	9.40419	-0.727019	-0.0541642	0.96629	ENSG00000051009.10	FAM160A2	4.19725	4.83274	0.414195	0.0478784
chrX_107118639_107119039	5.86314	5.62495	-0.238198	-0.0500766	0.956209	ENSG00000089682.16	RBM41	3.09843	3.37158	0.3102	0.21679
chr4_83334721_83335121	6.76806	6.059	-0.709065	-0.506031	0.342393	ENSG00000173083.14	HPSE	3.15602	3.35451	-0.250504	0.397982
chrX_72714046_72714446	4.99209	4.96502	-0.0270658	0.203564	0.809111	ENSG00000067177.14	PHKA1	2.99347	3.17615	0.164884	0.379694
chr17_58417460_58417860	6.01795	6.44644	-0.314572	0.613345	0.208327	ENSG00000108375.12	RNF43	2.88727	2.51818	-0.458588	0.057461
chr13_24922772_24923172	7.03478	6.56248	-0.4723	-0.275658	0.684198	ENSG00000151849.14	CENPJ	1.60113	1.41972	-0.1321	0.636188
chr11_74398592_74398992	6.2315	6.32343	0.0919225	0.290823	0.649579	ENSG00000165434.7	PGM2L1	1.51946	1.28389	-0.14342	0.714251
chr17_39451106_39451506	5.26818	5.70094	0.432759	0.60423	0.234945	ENSG00000125686.11	MED1	4.37207	3.74899	-0.802675	0.032526
chr19_10960598_10960998	5.95506	6.58615	0.631088	0.81131	0.0701047	ENSG00000127616.18	SMARCA4	6.83702	7.14634	0.116194	0.431276
chr6_30489236_30489636	5.89233	6.25924	0.366913	0.561727	0.264166	ENSG00000204592.8	HLA-E	5.85905	5.7822	-0.0396551	0.845541
chr20_18137725_18138125	5.86138	5.61181	-0.340152	-0.0341907	0.970814	ENSG00000149474.13	KAT14	1.96502	1.18584	-0.743648	0.0433776
chr2_264666_265066	6.92022	6.82349	-0.0967271	0.107662	0.898827	ENSG00000035115.21	SH3YL1	0.704356	1.1635	0.540574	0.242886
chr7_151057868_151058268	7.80575	7.71348	-0.0922732	0.105929	0.908643	ENSG00000164885.12	CDK5	4.68334	4.45441	-0.282384	0.277902
chrX_119399201_119399601	5.72468	5.08982	-0.634868	-0.443625	0.450212	ENSG00000077713.18	SLC25A43	3.63165	3.29823	-0.343168	0.127552
chr3_136861946_136862346	8.57659	8.16932	-0.407271	-0.201059	0.820454	ENSG00000158092.6	NCK1	4.80465	4.069	-0.488523	0.0361655
chr14_52706933_52707333	6.10612	6.1153	-0.589956	0.201731	0.776272	ENSG00000100519.11	PSMC6	5.60324	5.81375	0.344027	0.0831636
chr3_112562169_112562569	7.99638	7.69354	-0.331779	-0.103943	0.911188	ENSG00000138459.8	SLC35A5	3.75003	3.82912	0.0364667	0.915939
chr11_68212673_68213073	3.91776	4.24383	0.326068	0.450785	0.562373	ENSG00000110066.14	KMT5B	2.25801	2.94313	0.552798	0.0424284
chr5_138338059_138338459	6.45478	6.77775	0.0655896	0.533234	0.317397	ENSG00000120709.10	FAM53C	4.90076	5.2267	0.32885	0.0555669
chr19_6737515_6737915	5.82341	6.15306	0.405406	0.504127	0.331706	ENSG00000125734.15	GPR108	5.06214	5.49105	0.21492	0.229758
chr1_153922898_153923298	7.1357	7.32911	0.193411	0.382844	0.546343	ENSG00000143614.9	GATAD2B	4.13758	3.36741	-0.480528	0.0221107
chr6_30326819_30327219	6.33193	5.9401	-0.391835	-0.19418	0.786716	ENSG00000204599.14	TRIM39	3.11369	3.23592	0.248135	0.291153
chr7_156640497_156640897	5.17183	4.78002	-0.650623	-0.207167	0.799073	ENSG00000105982.16	RNF32	-1.13615	-0.496833	1.1504	0.133894
chr10_70233286_70233686	6.04785	6.43072	0.382871	0.574904	0.250258	ENSG00000180817.11	PPA1	8.03277	8.18296	0.186242	0.220508
chr8_19313739_19314139	5.81815	5.22859	-0.589562	-0.376828	0.542602	ENSG00000104611.11	SH2D4A	5.00529	4.89554	-0.0426034	0.84935
chr17_50426028_50426428	4.60509	4.73407	-0.50568	0.294037	0.706752	ENSG00000167107.12	ACSF2	4.96157	4.01834	-1.08821	0.00333795
chr22_43089182_43089582	5.62288	5.72721	0.742427	0.300203	0.640997	ENSG00000100271.16	TTLL1	1.44181	1.43013	-0.00301367	0.994576
chr2_73385608_73386008	6.97218	7.20993	0.237749	0.439943	0.461115	ENSG00000116127.17	ALMS1	1.22326	1.59109	-0.32158	0.533076
chr6_87322389_87322789	5.48164	5.00403	-0.477604	-0.277691	0.698747	ENSG00000111850.10	SMIM8	0.482846	0.789349	0.062192	0.920201
chr12_48971392_48971792	4.66883	4.70805	0.0392196	0.257307	0.756125	ENSG00000169884.13	WNT10B	3.8448	3.91869	0.095797	0.669146
chr18_50559781_50560181	5.16044	4.16714	-0.993309	-0.75479	0.196064	ENSG00000141639.11	MAPK4	5.31313	4.24922	-1.06866	0.00308256
chr3_138608611_138609011	6.33271	5.96896	-0.363744	-0.156198	0.837606	ENSG00000158234.12	FAIM	4.93844	4.75999	-0.182856	0.489377
chr8_127222831_127223231	7.71696	7.53396	-0.5053	0.0688953	0.944428	ENSG00000254166.2	CASC19	4.33275	4.59618	-0.249055	0.207764
chr7_90346479_90346879	7.08082	6.7979	-0.282923	-0.113827	0.891413	ENSG00000105793.15	GTPBP10	3.83319	4.37924	0.269806	0.246103
chr7_143836627_143837027	4.92654	4.58769	-0.338848	-0.168888	0.848925	ENSG00000253882.6	AC099548.2	-0.287163	-0.994252	-0.799207	0.197087
chr1_15409699_15410099	5.38373	5.40923	0.0255027	0.236656	0.746682	ENSG00000142634.12	EFHD2	6.89832	7.47954	0.589249	0.0101033
chr10_124916605_124917005	7.22093	7.03392	-0.18701	0.0139962	0.988706	ENSG00000249456.1	AL731577.2	2.08544	2.48671	0.444727	0.389303
chr20_45406546_45406946	4.04365	3.24857	-0.795077	-0.548548	0.541989	ENSG00000244274.7	DBNDD2	6.03915	5.59443	-0.415472	0.103224
chr11_77637594_77637994	5.96056	6.09929	0.138729	0.344583	0.571379	ENSG00000074201.8	CLNS1A	7.34667	7.87408	0.552017	0.0117588
chr16_3059280_3059680	5.67217	5.30008	-0.372084	-0.161169	0.839885	ENSG00000261971.7	MMP25-AS1	1.67806	1.27014	-0.576005	0.164215
chr17_60088216_60088616	4.81865	4.1414	-0.677241	-0.439525	0.548782	ENSG00000261040.7	WFDC21P	4.51818	3.5909	-1.42606	0.00865088
chr4_75990771_75991171	5.19001	5.21727	0.0272615	0.235007	0.758041	ENSG00000198301.11	SDAD1	3.47238	3.49598	0.0533724	0.808003
chr5_177599911_177600311	6.25611	5.8212	-0.379192	-0.220134	0.754359	ENSG00000027847.13	B4GALT7	4.17061	4.1387	-0.0225608	0.92671
chr22_31122719_31123119	3.81254	3.3185	-0.494036	-0.31786	0.771371	ENSG00000185133.13	INPP5J	2.45537	1.65957	-0.761688	0.0832817
chr7_2314344_2314744	5.82396	6.47265	-0.14021	0.799254	0.0718587	ENSG00000106266.10	SNX8	5.42451	6.79188	0.685477	0.00587383
chr10_120851144_120851544	7.02565	6.45779	-0.56786	-0.349704	0.579438	ENSG00000120008.15	WDR11	4.01023	3.86562	-0.284491	0.15881
chr2_74472477_74472877	5.53218	5.57447	0.0422884	0.210254	0.770497	ENSG00000204822.6	MRPL53	5.84464	5.39406	-0.425974	0.0620008
chr5_180209042_180209442	4.70657	4.58347	-0.123106	-0.00608383	0.995615	ENSG00000146090.15	RASGEF1C	0.0546468	0.71696	0.680825	0.263575
chr19_35612509_35612909	4.40814	4.99031	0.582173	0.763976	0.172898	ENSG00000249115.8	HAUS5	3.92654	3.82919	-0.262722	0.164339
chr6_44257334_44257734	6.03469	6.29282	0.258125	0.481181	0.375331	ENSG00000157593.18	SLC35B2	6.17701	5.06678	-1.09886	0.0019273
chrX_19515229_19515629	5.79125	5.60794	-0.183307	-0.0039299	0.996578	ENSG00000180815.14	MAP3K15	1.12985	0.806129	-0.34326	0.261811
chr1_179293564_179293964	7.10998	6.92815	0.323678	0.00663135	0.994541	ENSG00000057252.12	SOAT1	5.02099	5.16785	0.254377	0.164708
chr19_10717710_10718110	6.99153	7.40278	0.41125	0.603739	0.258809	ENSG00000079805.16	DNM2	6.64868	6.93286	0.343418	0.0422371
chr14_23555894_23556294	6.17702	5.4628	-0.537324	-0.49371	0.363299	ENSG00000136367.13	ZFHX2	-1.805	-2.28673	-1.49498	0.0572858
chr20_11892202_11892602	6.26334	5.95665	-0.296	-0.120517	0.879107	ENSG00000132640.14	BTBD3	5.25394	5.11144	-0.1056	0.500293
chr15_34209914_34210314	6.27758	5.91773	-0.342369	-0.14967	0.845894	ENSG00000134152.10	KATNBL1	3.20151	3.80144	0.339107	0.199675
chr5_16465677_16466077	8.38749	7.43615	-0.951346	-0.735715	0.184925	ENSG00000173545.4	ZNF622	6.15107	6.69681	0.5603	0.00885112
chr1_58699915_58700315	7.97619	7.72806	-0.299924	-0.042483	0.96705	ENSG00000162601.9	MYSM1	2.91835	2.92355	-0.179604	0.659421
chr15_42208097_42208497	4.87938	4.55689	-0.379044	-0.138287	0.882263	ENSG00000166887.15	VPS39	3.53085	2.95776	-0.498703	0.0262543
chr4_78552377_78552777	6.02072	5.45858	-0.562139	-0.326362	0.612734	ENSG00000138772.12	ANXA3	5.08481	4.92583	-0.166542	0.380261
chr7_90403251_90403651	7.7709	7.42679	-0.344114	-0.150134	0.860485	ENSG00000157224.15	CLDN12	2.09432	2.8843	1.01355	0.0068468
chrX_31209314_31209714	8.09676	6.42945	-0.943917	-1.40978	0.001724	ENSG00000198947.15	DMD	4.56045	4.7379	-0.120156	0.511146
chr21_41879281_41879681	4.258	3.69413	-0.563869	-0.395765	0.640392	ENSG00000141956.13	PRDM15	2.94854	2.92259	-0.134114	0.478877
chr2_36966509_36966909	8.44255	8.01178	-0.430768	-0.235149	0.780172	ENSG00000115808.11	STRN	2.41228	1.73955	-0.718	0.0107234
chr17_7351569_7351969	6.41021	6.41287	0.00265573	0.231488	0.743507	ENSG00000213859.5	KCTD11	2.13538	1.3726	-0.776739	0.0234186
chr3_127672788_127673188	5.8963	6.11232	0.216018	0.416115	0.463048	ENSG00000114626.17	ABTB1	2.93782	3.33176	0.451543	0.0805756
chr19_44677059_44677459	3.37835	3.01041	-0.367942	-0.171451	0.910734	ENSG00000186567.12	CEACAM19	0.302368	0.53289	0.265912	0.594723
chr19_572149_572549	5.87044	6.35848	0.488041	0.699999	0.140089	ENSG00000267751.5	AC009005.1	3.62071	2.81632	-0.895688	0.0513889
chr3_99817682_99818082	6.6689	6.63545	-0.0334411	0.179192	0.813093	ENSG00000184220.11	CMSS1	5.82923	6.2759	0.434301	0.0340409
chr17_4795944_4796344	3.98254	4.43662	0.454079	0.606616	0.365969	ENSG00000142507.9	PSMB6	8.26342	8.40663	0.167037	0.353645
chr19_44051719_44052119	4.00756	4.31671	0.30914	0.486303	0.51163	ENSG00000178386.12	ZNF223	-1.5	-1.60545	1.89521	0.0687605
chr11_62841261_62841661	7.01121	6.94387	0.0280448	0.158906	0.84483	ENSG00000133316.15	WDR74	6.74247	7.22657	0.539967	0.0100194
chr5_177006596_177006996	6.06812	6.16584	0.0880906	0.298424	0.63711	ENSG00000087206.16	UIMC1	4.04998	4.45911	0.344999	0.0862124
chr1_16366981_16367381	5.47981	6.03043	0.550619	0.742437	0.110075	ENSG00000055070.16	SZRD1	6.31542	6.38359	-0.31013	0.0688751
chr5_177133530_177133930	5.17212	5.70962	0.537497	0.737431	0.13249	ENSG00000165671.20	NSD1	3.90564	3.53363	-0.279473	0.367534
chr1_108876733_108877133	7.18895	7.04682	-0.14213	0.0536986	0.954861	ENSG00000121957.13	GPSM2	4.63357	4.6261	0.00159954	0.993645
chr10_11875799_11876199	6.83995	6.55474	-0.534563	-0.0717331	0.935298	ENSG00000225778.5	PROSER2-AS1	-0.905483	-1.20253	-0.12712	0.85061
chr20_3820277_3820677	5.44194	5.94497	0.503025	0.695729	0.146401	ENSG00000125843.10	AP5S1	2.89669	2.64988	-0.291769	0.264188
chr11_61680159_61680559	4.36435	4.69611	0.331764	0.496185	0.460673	ENSG00000134780.9	DAGLA	1.20768	1.31788	0.128142	0.636041
chr20_40689145_40689545	7.33174	6.12335	-1.20839	-1.01668	0.0204379	ENSG00000204103.3	MAFB	-2.06645	-2.71798	-1.32651	0.309526
chr15_98896915_98897315	7.5514	7.1899	-0.189949	-0.153341	0.854854	ENSG00000140443.14	IGF1R	5.0916	5.21833	0.181934	0.338287
chr4_22515794_22516194	6.2369	5.74073	-1.00272	-0.330422	0.586306	ENSG00000152990.13	ADGRA3	3.50954	3.5025	-0.120335	0.59873
chr5_134738252_134738652	6.01092	6.34008	0.196918	0.530883	0.30418	ENSG00000164615.4	CAMLG	4.21891	4.64703	0.427179	0.0548986
chr15_44288487_44288887	5.9433	5.4941	-0.449193	-0.243604	0.724817	ENSG00000166734.19	CASC4	3.28855	3.19763	-0.0952402	0.651663
chr2_10302466_10302866	7.32538	7.18263	-0.142755	0.0430113	0.964735	ENSG00000285872.1	AC007240.2	-2.17554	-1.32283	1.24313	0.191606
chr1_153678968_153679368	4.19082	4.53952	0.489961	0.581577	0.38375	ENSG00000169418.9	NPR1	5.11371	5.11161	0.0164217	0.929492
chr15_50182026_50182426	3.5812	3.46143	-0.119778	0.0266887	0.985754	ENSG00000140284.10	SLC27A2	3.48599	2.70647	-0.877952	0.00965485
chr3_49094058_49094458	7.15428	7.71575	0.56147	0.770869	0.132005	ENSG00000198218.10	QRICH1	5.80387	5.73978	-0.11973	0.44048
chr1_37474328_37474728	6.30806	6.50453	0.0352372	0.398857	0.491767	ENSG00000163874.10	ZC3H12A	3.22649	2.77128	-0.467735	0.0667263
chr22_28741695_28742095	6.50091	6.56652	0.0656105	0.281042	0.671729	ENSG00000100209.9	HSCB	4.16209	4.0555	-0.0689958	0.80188
chr1_89022143_89022543	5.47189	5.25053	-0.22136	-0.0453009	0.961498	ENSG00000117226.11	GBP3	-0.171775	0.736919	0.517066	0.326245
chr19_54463577_54463977	6.21487	6.387	0.172129	0.37426	0.526055	ENSG00000275183.1	LENG9	2.33018	0.844963	-1.52254	0.00420387
chr4_119454523_119454923	7.23787	6.81453	-0.423344	-0.22826	0.756678	ENSG00000245958.6	AC093752.1	2.84381	3.14727	0.35379	0.36626
chr19_49453262_49453662	5.60155	5.92869	0.225719	0.520619	0.319314	ENSG00000104872.10	PIH1D1	6.25493	6.43503	0.182739	0.322023
chr6_43427422_43427822	6.27003	6.4406	0.170565	0.376643	0.528259	ENSG00000124574.14	ABCC10	2.30979	2.60924	0.225776	0.331696
chr1_155961951_155962351	6.20844	6.17079	0.355445	0.19845	0.787052	ENSG00000116584.17	ARHGEF2	5.78292	5.22297	-0.592361	0.00752279
chr16_30658083_30658483	6.78706	7.15459	0.367526	0.592346	0.268807	ENSG00000156860.15	FBRS	4.21119	4.61054	0.412465	0.0376931
chr3_51670976_51671376	6.67685	6.08753	-0.237115	-0.380031	0.522101	ENSG00000164081.12	TEX264	5.63857	6.34178	0.724106	0.00548793
chr11_65181353_65181753	5.11849	5.09202	-0.0264671	0.165281	0.844422	ENSG00000014216.15	CAPN1	5.97554	5.93548	0.00395818	0.982256
chr17_74203393_74203793	5.45019	5.44841	-0.0108497	0.236978	0.749885	ENSG00000172809.12	RPL38	11.7822	11.6653	-0.010439	0.953753
chr15_34436866_34437266	4.3439	3.59633	-0.743822	-0.516252	0.513032	ENSG00000175265.17	GOLGA8A	3.00351	2.86246	0.0176813	0.941386
chr9_128702339_128702739	5.16831	5.39185	0.223541	0.427137	0.487452	ENSG00000160447.6	PKN3	5.09468	5.28734	0.169965	0.344265
chr10_126902161_126902561	5.75152	4.65108	-0.791969	-0.8704	0.0833559	ENSG00000150760.12	DOCK1	3.31179	2.99823	-0.46372	0.0373848
chr6_33322964_33323364	6.10143	6.36209	0.260661	0.459287	0.399348	ENSG00000204209.12	DAXX	5.82229	5.97376	0.116987	0.462344
chr7_92590121_92590521	7.52698	7.24717	-0.279818	-0.0652813	0.94498	ENSG00000234545.7	FAM133B	3.61776	3.58818	0.0021317	0.993041
chr1_47190170_47190570	5.68814	4.71653	-0.345036	-0.776977	0.122704	ENSG00000162366.7	PDZK1IP1	0.29176	-1.81654	-2.476	0.0207287
chr3_38346590_38346990	7.19288	6.66691	-0.525977	-0.338083	0.599638	ENSG00000093217.10	XYLB	2.08037	2.30123	0.263839	0.40976
chr7_77536734_77537134	7.56323	7.57006	0.00682687	0.193944	0.809847	ENSG00000127947.15	PTPN12	4.08831	4.5801	0.578923	0.0153246
chr13_75537986_75538386	7.62286	7.30065	-0.322206	-0.136094	0.873727	ENSG00000188243.12	COMMD6	6.8903	6.50466	-0.238813	0.240618
chr19_46850746_46851146	5.03215	5.65134	0.619193	0.800779	0.0950256	ENSG00000042753.11	AP2S1	7.33402	7.73832	0.399395	0.0321389
chr19_2385131_2385531	4.92128	4.66351	-0.257772	-0.0933011	0.922978	ENSG00000178297.13	TMPRSS9	-0.140693	-2.55889	-2.40905	0.0161549
chr6_73452105_73452505	6.91176	6.30461	-0.607147	-0.412591	0.477941	ENSG00000164430.15	CGAS	3.82897	4.61223	0.787415	0.00430189
chr17_68247741_68248141	6.89484	6.84284	-0.051999	0.159859	0.841688	ENSG00000196704.11	AMZ2	5.80038	6.10885	0.371059	0.0587588
chr2_191677825_191678225	8.11316	7.84139	-0.271771	-0.0621974	0.951043	ENSG00000173559.12	NABP1	3.94987	3.1193	-0.873505	0.00725137
chr7_128862561_128862961	6.17368	6.2591	0.0854251	0.27362	0.672609	ENSG00000128524.4	ATP6V1F	7.72151	8.03995	0.347949	0.0571948
chr16_56425359_56425759	6.00705	5.77094	-1.01714	-0.0820469	0.921414	ENSG00000159461.14	AMFR	4.8405	5.81785	0.970157	0.00178257
chr22_46762380_46762780	5.40122	5.76326	0.141779	0.552484	0.291488	ENSG00000054611.13	TBC1D22A	4.14737	4.72213	0.537246	0.0179885
chr12_53984877_53985277	5.13368	5.70035	0.566665	0.763251	0.115061	ENSG00000180818.4	HOXC10	5.80432	6.05317	0.336116	0.0760436
chr15_64775442_64775842	4.03618	3.76105	-0.27513	-0.0778932	0.949009	ENSG00000166831.8	RBPMS2	4.22375	4.16888	-0.0825981	0.814118
chr5_173888035_173888435	7.10099	7.16277	0.155123	0.2495	0.728528	ENSG00000113742.12	CPEB4	2.24938	2.90849	0.434366	0.143483
chr5_160421628_160422028	7.48542	7.32124	-0.392426	0.0281757	0.977922	ENSG00000164609.9	SLU7	4.1261	4.45299	0.274531	0.169272
chr5_43514983_43515383	8.64641	8.1377	-0.508709	-0.295554	0.714497	ENSG00000172244.8	C5orf34	3.43327	3.07873	-0.456399	0.0848589
chr6_43369534_43369934	5.88495	6.23771	0.352757	0.546635	0.282226	ENSG00000171467.15	ZNF318	2.51056	2.11565	-0.430934	0.0431206
chr16_8963779_8964179	5.79049	5.3597	-0.177221	-0.248597	0.71872	ENSG00000187555.14	USP7	5.47637	5.63233	0.190269	0.256594
chr3_129690381_129690781	3.32628	3.95245	0.626166	0.748972	0.334797	ENSG00000172765.17	TMCC1	2.85584	2.78459	-0.00875466	0.973906
chr3_44510456_44510856	5.55978	5.41748	-0.142309	-0.0087301	0.992471	ENSG00000178917.16	ZNF852	1.59433	1.8641	0.213859	0.569738
chr17_67246367_67246767	5.12797	4.96206	-0.165907	0.04694	0.963455	ENSG00000198265.11	HELZ	3.1474	3.14592	-0.0633122	0.774449
chr3_128680625_128681025	6.63758	6.70687	0.164911	0.268822	0.691372	ENSG00000163902.11	RPN1	8.05447	7.91025	-0.128551	0.382858
chr19_5340713_5341113	5.06509	5.05907	0.450284	0.170585	0.838634	ENSG00000105426.16	PTPRS	5.1103	4.60772	-0.658461	0.0156174
chr12_85872500_85872900	3.70144	3.45881	-0.579704	-0.0779639	0.954861	ENSG00000133636.10	NTS	-1.45308	-0.757699	0.889157	0.301666
chr1_2227618_2228018	6.21978	6.39193	0.172143	0.337565	0.575958	ENSG00000157933.9	SKI	3.74346	3.5235	-0.288212	0.212058
chr11_67239705_67240105	5.70664	6.09204	0.286818	0.612395	0.223101	ENSG00000173120.14	KDM2A	4.47366	4.44524	-0.135921	0.522548
chr17_28552471_28552871	5.08647	5.50583	0.270004	0.638767	0.232974	ENSG00000109103.11	UNC119	4.43026	5.52695	1.07108	0.00159265
chr17_7857329_7857729	6.3416	6.57814	0.308827	0.431987	0.445441	ENSG00000183011.13	NAA38	7.09652	6.9772	0.11883	0.512051
chr5_32059760_32060160	5.23512	4.4367	-0.183545	-0.531058	0.421238	ENSG00000133401.15	PDZD2	-2.70867	-2.72741	0.205397	0.873459
chr8_144444052_144444452	5.9669	6.2398	0.272904	0.440442	0.418151	ENSG00000160949.16	TONSL	5.13714	4.83742	-0.282261	0.113029
chr9_128786942_128787342	5.4683	5.57224	0.103938	0.297184	0.652023	ENSG00000107021.15	TBC1D13	4.39535	5.19985	0.980403	0.0026686
chr19_2427633_2428033	5.40543	6.04823	0.642798	0.823676	0.0662352	ENSG00000099800.7	TIMM13	7.10481	7.73424	0.634748	0.00572287
chr9_136052045_136052445	6.44715	6.32001	-0.0270515	0.0824641	0.922697	ENSG00000148411.7	NACC2	3.96708	3.28352	-0.673262	0.0069722
chr5_75717320_75717720	7.37921	7.22467	-0.154537	0.0269358	0.97858	ENSG00000152359.14	POC5	2.1305	2.14497	0.0163214	0.965124
chr4_15681426_15681826	7.78544	7.41765	-0.395981	-0.179193	0.827628	ENSG00000118564.14	FBXL5	3.15633	3.84939	0.729896	0.0186966
chr1_26279848_26280248	4.42676	4.45906	0.295998	0.23046	0.793468	ENSG00000142669.14	SH3BGRL3	5.50352	5.52436	0.00307472	0.988197
chr3_183697629_183698029	6.23182	5.8527	-0.379117	-0.162305	0.830636	ENSG00000163872.15	YEATS2	4.24255	3.57739	-0.580702	0.0108642
chr12_56266791_56267191	6.18595	6.66123	0.475278	0.667126	0.167042	ENSG00000135469.13	COQ10A	4.08646	3.8117	-0.318883	0.317252
chr22_50474922_50475322	5.30131	5.51482	0.213512	0.363102	0.556457	ENSG00000100241.20	SBF1	5.22114	5.45077	-0.0288115	0.878346
chr19_10380482_10380882	5.98202	6.24241	0.288466	0.456457	0.401155	ENSG00000105397.13	TYK2	6.07321	6.3461	-0.0780984	0.627957
chr1_204494543_204494943	6.28252	6.25646	-0.54759	0.187686	0.797948	ENSG00000133056.13	PIK3C2B	5.06187	3.84557	-1.11013	0.00181184
chr2_240998247_240998647	4.98238	4.90971	-0.0726713	0.127672	0.888091	ENSG00000162804.13	SNED1	0.010882	-0.460695	-1.13398	0.0229387
chr15_80778960_80779360	6.6669	6.20207	-0.458692	-0.273563	0.676986	ENSG00000103888.16	CEMIP	1.59556	1.45201	-0.0926463	0.889391
chr16_2721191_2721591	5.94803	6.0092	0.0611755	0.26515	0.687983	ENSG00000172382.9	PRSS27	0.501549	1.61091	1.21236	0.0394034
chr1_44029969_44030369	5.82728	5.80167	0.0145689	0.191603	0.795065	ENSG00000230615.6	AL139220.2	2.46221	2.22501	-0.312404	0.469806
chr5_149960514_149960914	6.59219	6.7984	0.0675518	0.387492	0.515335	ENSG00000155850.7	SLC26A2	2.96159	1.75222	-1.21522	0.0137507
chr20_17968726_17969126	6.92542	6.98822	0.0628005	0.262577	0.707196	ENSG00000089006.16	SNX5	5.75126	5.53748	-0.184723	0.292666
chr3_127590830_127591230	7.02916	7.24223	0.213071	0.413242	0.499163	ENSG00000163870.15	TPRA1	5.18903	5.5928	0.456021	0.0286652
chr1_232950324_232950724	6.46094	6.29369	-0.167251	0.0329017	0.971657	ENSG00000135778.11	NTPCR	6.11821	6.35336	0.142594	0.434367
chr1_156500764_156501164	7.30957	7.56051	-0.00242015	0.479093	0.430607	ENSG00000116604.17	MEF2D	4.67599	3.75911	-0.966028	0.00197663
chr1_235161059_235161459	6.73533	6.57278	-0.162556	0.017481	0.985655	ENSG00000188739.14	RBM34	5.97605	6.46923	0.671923	0.00740988
chr9_21802443_21802843	7.4285	6.54831	-1.0028	-0.662362	0.19828	ENSG00000099810.19	MTAP	4.99236	5.01168	-0.288723	0.150976
chr19_45370464_45370864	4.78624	5.43945	0.653213	0.812613	0.101907	ENSG00000104884.15	ERCC2	4.87779	4.34501	-0.378863	0.0516757
chr15_66386594_66386994	6.29937	6.4615	0.0693373	0.361069	0.547379	ENSG00000075131.9	TIPIN	4.07204	4.91586	0.870538	0.00592137
chrX_119574288_119574688	6.42877	6.14768	-0.281084	-0.0531977	0.953531	ENSG00000077721.15	UBE2A	5.99722	6.35823	0.144962	0.39926
chr10_29735697_29736097	5.59012	5.48247	-0.454823	0.0701232	0.936365	ENSG00000197321.14	SVIL	3.45658	2.71278	-0.640816	0.015773
chrX_70133302_70133702	6.96597	6.35528	-0.61069	-0.375246	0.546684	ENSG00000089289.15	IGBP1	5.67647	4.53852	-1.08992	0.371245
chr19_52095644_52096044	5.27283	5.72311	0.450282	0.664094	0.18866	ENSG00000197608.11	ZNF841	0.830419	0.720317	0.027673	0.955144
chr1_150876568_150876968	7.50042	7.69316	0.192735	0.402561	0.538594	ENSG00000143437.20	ARNT	4.99038	4.38223	-0.482717	0.019568
chr18_68714947_68715347	7.43327	6.65446	-0.778809	-0.591643	0.265319	ENSG00000150636.17	CCDC102B	-0.494252	-0.89793	-0.603767	0.52372
chr2_222860739_222861139	7.336	7.14873	-0.165419	0.0209038	0.983927	ENSG00000123983.13	ACSL3	5.15527	5.40708	-0.114499	0.492855
chr9_98192548_98192948	5.98905	5.73093	-0.517163	-0.0628052	0.942995	ENSG00000106789.12	CORO2A	3.09308	2.19944	-0.899404	0.0066032
chr3_66500936_66501336	7.90409	7.30856	-0.710662	-0.40779	0.529997	ENSG00000144749.13	LRIG1	1.06718	0.808978	-0.738672	0.0403358
chr16_85612122_85612522	5.52814	5.76642	0.17895	0.432652	0.447515	ENSG00000131149.18	GSE1	4.46936	4.54462	0.0360538	0.843781
chr1_119987082_119987482	5.77083	5.02032	-0.750507	-0.541958	0.325844	ENSG00000134250.19	NOTCH2	6.16127	5.53785	-0.604198	0.281432
chr9_93109111_93109511	3.39279	3.90663	0.513839	0.656704	0.420931	ENSG00000165233.17	CARD19	5.12356	4.83128	-0.268177	0.243689
chr14_104985547_104985947	5.83429	5.78975	-0.0445319	0.150945	0.844422	ENSG00000140104.13	CLBA1	2.9625	2.55078	-0.300661	0.258755
chr17_28335444_28335844	7.31949	7.36761	0.048113	0.259323	0.724329	ENSG00000109079.9	TNFAIP1	5.62762	5.26283	-0.326715	0.0561329
chr12_21501498_21501898	8.70739	7.89727	-0.810116	-0.612897	0.321241	ENSG00000004700.15	RECQL	4.33272	3.60525	-0.680678	0.0102939
chr17_82716564_82716964	4.32577	4.87966	0.553896	0.757704	0.188676	ENSG00000141560.14	FN3KRP	4.28762	4.98262	0.724735	0.00847008
chr15_74433677_74434077	4.84355	5.1998	0.176812	0.53248	0.367158	ENSG00000138623.10	SEMA7A	3.50112	4.08557	0.661006	0.00881732
chr19_1905118_1905518	5.89836	6.47406	0.575703	0.7531	0.0992006	ENSG00000213638.5	ADAT3	2.94546	3.67543	0.758426	0.0218652
chr9_97501370_97501770	5.31497	5.55565	0.240676	0.40346	0.498646	ENSG00000136842.13	TMOD1	1.65807	1.10942	-0.660142	0.0790983
chr12_4538582_4538982	6.96621	6.52784	-0.438373	-0.24105	0.731385	ENSG00000111247.14	RAD51AP1	3.69834	4.10094	0.387256	0.107835
chr22_38700818_38701218	5.82154	6.43262	0.611078	0.802163	0.0744136	ENSG00000100221.10	JOSD1	5.16992	4.59972	-0.573052	0.0111775
chr11_35944097_35944497	6.03935	5.45806	-0.581288	-0.401462	0.484707	ENSG00000179241.12	LDLRAD3	3.59239	2.84095	-0.776462	0.00703317
chr1_52141859_52142259	5.90527	5.81632	-0.0889549	0.106066	0.896289	ENSG00000157077.14	ZFYVE9	3.13157	3.62652	0.478992	0.0395334
chr8_93754636_93755036	7.5182	6.99864	-0.519558	-0.310876	0.649558	ENSG00000164953.15	TMEM67	2.11233	2.12144	0.393406	0.198563
chr4_78939240_78939640	7.19413	6.49346	-0.700674	-0.501809	0.366074	ENSG00000163291.14	PAQR3	1.9666	2.40973	0.479384	0.126845
chr3_43105909_43106309	6.20118	5.94175	-0.259428	-0.115586	0.883334	ENSG00000144647.5	POMGNT2	3.97901	4.92125	0.957851	0.00214448
chr6_37353779_37354179	5.38042	5.48264	0.102219	0.31222	0.63958	ENSG00000112130.16	RNF8	4.93784	5.59664	0.698269	0.00698054
chr12_53295281_53295681	5.47352	5.99246	0.518941	0.719062	0.128817	ENSG00000123349.13	PFDN5	9.7741	9.60251	-0.114593	0.439011
chr3_184335714_184336114	6.23089	6.5463	0.430468	0.51358	0.330346	ENSG00000175182.14	FAM131A	3.50919	3.57939	0.136201	0.583968
chr9_107489820_107490220	7.53326	7.28477	-0.405594	-0.0575611	0.951977	ENSG00000136826.14	KLF4	3.99105	3.16116	-0.851998	0.00887696
chr1_164675511_164675911	4.44909	4.00535	-0.443744	-0.297216	0.727991	ENSG00000269887.1	AL391001.1	-0.825997	0.0565835	0.991922	0.242309
chr9_136410445_136410845	4.52631	4.95262	0.426314	0.5779	0.339383	ENSG00000165688.11	PMPCA	6.78252	7.31142	0.583734	0.00646881
chr19_42254956_42255356	4.35579	4.83409	0.478302	0.651683	0.27773	ENSG00000105722.9	ERF	5.31875	5.54937	0.168776	0.316122
chr11_18698516_18698916	5.62495	5.43661	-0.18834	-0.0248304	0.97957	ENSG00000151117.8	TMEM86A	-1.3542	-1.17923	0.646525	0.315717
chr10_122954079_122954479	6.37024	6.22422	-0.146023	0.0380796	0.966742	ENSG00000119965.12	C10orf88	2.13093	2.72842	0.446906	0.104416
chr1_111739242_111739642	7.85646	6.99856	-0.857899	-0.658614	0.219833	ENSG00000197852.10	INKA2	1.65377	1.33281	-0.362516	0.169809
chr19_680364_680764	6.81116	7.42167	0.610508	0.807621	0.0960966	ENSG00000070404.9	FSTL3	8.59793	7.79127	-0.800431	0.00242594
chr5_10353403_10353803	8.50338	8.22964	-0.273746	-0.0670339	0.949256	ENSG00000145495.15	2023-03-06	7.28636	7.8157	0.450168	0.0155937
chr19_44164797_44165197	5.1134	5.43817	0.324767	0.529231	0.352552	ENSG00000167380.16	ZNF226	1.60047	2.07193	0.572017	0.179981
chr2_106194249_106194649	7.24916	6.91243	-0.478901	-0.177194	0.819551	ENSG00000115652.14	UXS1	5.01012	5.25055	0.242991	0.209404
chr6_89352634_89353034	6.95705	6.18337	-0.77368	-0.556515	0.291206	ENSG00000198833.6	UBE2J1	4.05028	4.06908	0.0280732	0.89618
chr2_171999685_172000085	5.69813	5.52518	-0.168517	0.00978296	0.991538	ENSG00000115840.13	SLC25A12	3.48285	3.73221	0.249155	0.2175
chr13_101416193_101416593	5.57686	5.24349	-0.106706	-0.166493	0.831229	ENSG00000102452.16	NALCN	-0.536697	-0.167213	0.602852	0.388052
chr10_46106615_46107015	4.71282	3.79844	-0.914385	-0.719749	0.25349	ENSG00000264204.2	AGAP7P	-0.692669	-0.622684	0.0695192	0.934275
chr4_47485067_47485467	6.89391	6.35494	-0.702021	-0.356257	0.559811	ENSG00000145246.13	ATP10D	2.56123	2.22955	-0.296539	0.174058
chr9_96418385_96418785	7.17992	7.52768	0.238297	0.542611	0.337909	ENSG00000165244.6	ZNF367	2.18776	2.63453	0.464568	0.0639696
chr17_10114973_10115373	4.52333	4.28556	-0.133981	-0.0541644	0.960294	ENSG00000007237.18	GAS7	0.521602	0.201961	-0.560014	0.136813
chr12_63779734_63780134	7.62571	7.41716	-0.208552	-0.0285621	0.977818	ENSG00000118600.11	RXYLT1	3.89135	4.00731	0.101494	0.669096
chr12_121888493_121888893	6.25413	6.70496	0.0129812	0.66548	0.175596	ENSG00000110801.13	PSMD9	6.35296	6.80908	0.585446	0.00991956
chr1_109655944_109656344	3.74849	4.55989	0.811399	1.03101	0.0736167	ENSG00000168765.16	GSTM4	5.10327	3.60321	-1.50327	0.000945761
chr3_139343820_139344220	6.4282	6.40155	-0.0266526	0.175288	0.813823	ENSG00000175110.11	MRPS22	6.1067	6.17049	0.0790292	0.675815
chr11_63838739_63839139	6.01761	6.07732	0.0597095	0.242587	0.717892	ENSG00000072518.20	MARK2	3.78471	4.1645	0.527175	0.0172687
chr2_130181924_130182324	6.44281	6.49422	0.0514066	0.251819	0.711782	ENSG00000152082.13	MZT2B	7.20509	6.78454	-0.460059	0.0267777
chr14_57268650_57269050	6.7058	6.35133	-0.354468	-0.16178	0.833305	ENSG00000053770.11	AP5M1	2.85235	2.20707	-0.812933	0.0119041
chr17_2359504_2359904	5.29862	4.83157	-0.467051	-0.22937	0.776484	ENSG00000141258.12	SGSM2	5.08282	5.06417	-0.248016	0.148457
chr7_45111562_45111962	6.23826	6.14486	-0.0933922	0.124491	0.876255	ENSG00000136270.13	TBRG4	7.11052	7.24155	0.255476	0.107479
chr14_75982313_75982713	5.02281	5.02202	-0.000792303	0.206651	0.800066	ENSG00000119699.7	TGFB3	1.44552	1.25206	0.33833	0.425323
chr22_49918341_49918741	6.43502	6.52063	0.0856069	0.295336	0.648579	ENSG00000182858.13	ALG12	3.37899	3.41895	-0.0289938	0.903073
chr1_150579487_150579887	7.25988	7.33345	0.0735665	0.281827	0.691146	ENSG00000143384.12	MCL1	6.35449	6.89302	0.616518	0.00989746
chr3_51995765_51996165	5.06908	5.65621	0.587131	0.759385	0.115924	ENSG00000162244.11	RPL29	11.0399	10.765	-0.245807	0.109324
chr19_9819176_9819576	7.18922	7.49206	0.176057	0.519609	0.369501	ENSG00000127452.8	FBXL12	4.00577	4.3827	0.521772	0.0321551
chr1_151909343_151909743	7.52173	7.51403	-0.00769266	0.208038	0.793332	ENSG00000159445.12	THEM4	4.76024	5.09348	0.259583	0.191373
chr10_132331937_132332337	5.87673	5.78648	-0.090255	0.0866758	0.917018	ENSG00000148814.17	LRRC27	1.76703	2.33356	0.58186	0.0839939
chr19_44845916_44846316	4.88905	5.65993	0.652177	0.954486	0.0382296	ENSG00000130202.9	NECTIN2	5.57721	5.46229	-0.087626	0.613879
chr4_74157772_74158172	7.51236	7.09441	-0.620648	-0.229944	0.759776	ENSG00000163738.18	MTHFD2L	1.99737	2.15472	0.480637	0.152872
chr12_131894251_131894651	6.23794	5.96609	-0.429807	-0.100846	0.899907	ENSG00000177169.9	ULK1	4.28695	4.38409	0.150397	0.37587
chr17_28902899_28903299	5.90153	6.58164	0.680114	0.853914	0.0512193	ENSG00000167536.13	DHRS13	3.99727	4.64054	0.669745	0.00989082
chr17_16217021_16217421	4.26545	4.84972	0.584269	0.8101	0.159222	ENSG00000108474.16	PIGL	2.83432	3.29367	0.538042	0.21718
chr19_3785142_3785542	3.58855	4.45633	0.867776	1.10465	0.0607462	ENSG00000007264.14	MATK	5.91072	5.90892	0.0186986	0.924418
chr10_133357665_133358065	5.58472	5.07557	-0.509143	-0.26244	0.726361	ENSG00000148803.11	FUOM	4.93842	3.82423	-1.11458	0.00509634
chr1_100895855_100896255	9.41706	8.8025	-0.614562	-0.40768	0.621058	ENSG00000162694.13	EXTL2	3.76535	3.66182	0.037728	0.861509
chr7_151085954_151086354	6.8277	6.3126	-0.413241	-0.330005	0.598439	ENSG00000133612.18	AGAP3	5.51732	5.48858	-0.160802	0.349448
chr12_106139230_106139630	5.45286	5.10396	-0.439004	-0.162584	0.841878	ENSG00000074590.13	NUAK1	1.70923	1.83356	0.135289	0.565461
chr1_164558722_164559122	8.48071	8.21059	-0.770126	-0.0760735	0.941357	ENSG00000185630.18	PBX1	4.86565	3.4857	-1.20568	0.00128131
chr7_100148610_100149010	6.42246	6.63442	0.211953	0.402011	0.488549	ENSG00000188186.10	LAMTOR4	6.89548	7.0505	0.191327	0.296213
chr3_197736826_197737226	7.57773	7.46615	0.0845183	0.0823851	0.929225	ENSG00000122068.12	FYTTD1	4.0967	3.77049	0.072227	0.732134
chr1_93079017_93079417	6.55319	6.37077	-0.182421	0.0277502	0.976817	ENSG00000143033.17	MTF2	4.70705	5.20705	0.578625	0.0119239
chr6_30626693_30627093	4.45486	4.04867	-0.406186	-0.121936	0.908984	ENSG00000137343.17	ATAT1	2.04012	3.02235	1.02938	0.0087668
chr10_102502037_102502437	6.9624	7.32966	0.367257	0.576986	0.290008	ENSG00000138107.12	ACTR1A	6.32348	6.66537	0.41449	0.0232164
chr2_105329588_105329988	6.23757	5.36817	-0.869397	-0.697889	0.137255	ENSG00000135966.12	TGFBRAP1	4.0145	4.05424	0.134441	0.442757
chr2_190408113_190408513	5.50043	4.73093	-0.79879	-0.608787	0.266342	ENSG00000151690.14	MFSD6	0.900931	-0.761628	-1.39923	0.0203784
chr5_177303570_177303970	5.54167	5.68609	0.144414	0.360231	0.561837	ENSG00000169228.13	RAB24	4.40129	4.59977	0.178782	0.444405
chr5_148820820_148821220	3.64305	4.46002	0.81698	1.00077	0.0929115	ENSG00000169252.5	ADRB2	1.09436	0.92516	-0.167266	0.631909
chr11_76371160_76371560	4.03625	2.32874	-1.70751	-1.45569	0.0718964	ENSG00000137492.7	THAP12	4.10062	4.95134	0.87024	0.00386219
chr1_100179733_100180133	3.70212	3.85678	0.154662	0.338711	0.726636	ENSG00000122477.12	LRRC39	-0.858928	-1.16967	-0.200093	0.793315
chr9_120842822_120843222	8.08339	7.67007	-0.413324	-0.230544	0.772999	ENSG00000095261.13	PSMD5	5.22831	5.11465	-0.0715282	0.699338
chr12_131949636_131950036	6.81503	6.80568	-0.00934956	0.180057	0.812742	ENSG00000183495.13	EP400	3.91786	3.5577	-0.774694	0.00878394
chr6_2745243_2745643	3.16665	3.25038	0.0837329	0.276917	0.843385	ENSG00000145949.10	MYLK4	-2.19041	-2.60545	-0.938329	0.21166
chr9_7799636_7800036	7.09396	6.67456	-0.419399	-0.217717	0.766753	ENSG00000137038.7	DMAC1	5.70385	6.06504	0.283572	0.143684
chr1_150548912_150549312	5.6961	5.61803	-0.295515	0.123937	0.878635	ENSG00000143382.14	ADAMTSL4	6.21588	4.56094	-1.91497	0.000401675
chr15_34224763_34225163	5.77128	5.13726	-0.634016	-0.42177	0.483263	ENSG00000128463.12	EMC4	6.24428	6.39072	0.153101	0.384583
chrX_150363129_150363529	6.48124	6.07215	-0.40909	-0.170703	0.823083	ENSG00000013619.13	MAMLD1	3.32043	1.905	-1.41963	0.0011412
chr1_179877672_179878072	6.61644	6.90077	0.284326	0.478462	0.390308	ENSG00000169905.12	TOR1AIP2	5.1147	5.00138	-0.0602357	0.731591
chr12_55973673_55974073	8.53117	8.46736	-0.346724	0.131288	0.89308	ENSG00000111540.15	RAB5B	5.61025	5.07739	-0.533083	0.01084
chr1_59296720_59297120	9.47756	9.16722	-0.436311	-0.109328	0.924518	ENSG00000172456.17	FGGY	4.16907	3.72054	-0.340447	0.152812
chr2_183124480_183124880	6.87478	6.31291	-0.561877	-0.361645	0.554327	ENSG00000163002.12	NUP35	3.00171	3.45241	0.421503	0.181916
chr4_8468742_8469142	3.17542	3.24799	0.072568	0.173644	0.906064	ENSG00000155275.18	TRMT44	2.64466	3.19036	0.411917	0.166356
chr4_185812043_185812443	5.02671	5.01534	-0.332135	0.179274	0.831346	ENSG00000154556.18	SORBS2	6.25375	6.03396	-0.0280658	0.876798
chr11_36289291_36289691	6.1187	5.59642	-0.0960719	-0.319437	0.609928	ENSG00000110442.11	COMMD9	6.14305	6.09819	-0.0866167	0.6312
chr1_161749708_161750108	7.00345	6.91516	-0.0882817	0.116731	0.88963	ENSG00000081721.11	DUSP12	5.3843	5.97509	0.677477	0.00751343
chr19_49876527_49876927	4.99704	5.6675	0.670456	0.859864	0.069687	ENSG00000204673.10	AKT1S1	5.73046	5.61568	-0.0726307	0.708728
chr1_147242433_147242833	7.13881	7.17003	0.0312182	0.247104	0.73467	ENSG00000131778.18	CHD1L	5.29025	5.68113	0.332496	0.0593572
chr11_12377873_12378273	6.75724	6.21202	-0.597363	-0.351027	0.565854	ENSG00000197702.12	PARVA	4.22023	4.71311	0.500124	0.0170751
chr3_50299354_50299754	7.4365	7.71276	0.276251	0.476533	0.437338	ENSG00000186792.16	HYAL3	4.25972	4.30068	0.00806555	0.973536
chr17_82153901_82154301	4.00125	3.90597	-0.0952764	0.0978818	0.932737	ENSG00000265678.1	AC129510.1	1.07666	1.15214	0.118639	0.885689
chr22_29580951_29581351	5.12961	5.62917	0.499567	0.682559	0.174436	ENSG00000184117.11	NIPSNAP1	6.82969	6.48657	-0.327447	0.131841
chr7_6104509_6104909	6.8411	6.84435	0.0032508	0.16204	0.834648	ENSG00000106346.11	USP42	2.71204	2.94438	0.300979	0.146535
chr20_51023004_51023404	5.76135	5.359	0.0905528	-0.211362	0.771186	ENSG00000026559.13	KCNG1	3.20765	3.13673	0.0359687	0.907426
chr19_45692279_45692679	6.15874	6.54794	0.389194	0.58378	0.244198	ENSG00000011478.11	QPCTL	4.33662	4.03225	-0.365148	0.0919241
chr14_39266928_39267328	6.55861	6.48022	-0.0783947	0.13697	0.864122	ENSG00000150527.17	MIA2	3.4806	3.49992	0.110738	0.598476
chr6_31948769_31949169	5.63048	4.83087	-0.631188	-0.539828	0.369258	ENSG00000243649.8	CFB	4.35564	3.56055	-0.964218	0.00367698
chr17_81927684_81928084	5.3357	5.45947	0.12377	0.319425	0.628722	ENSG00000197063.10	MAFG	3.33578	4.19529	0.857606	0.00295409
chr3_100260639_100261039	7.56548	7.52161	-0.0591984	0.169553	0.839372	ENSG00000036054.12	TBC1D23	3.30865	2.40241	-0.900575	0.00620097
chr9_134135700_134136100	4.04967	4.4556	0.405934	0.592899	0.376617	ENSG00000196363.9	WDR5	5.27962	6.04132	0.756225	0.00303615
chr6_21589031_21589431	5.81572	5.59353	-0.222186	-0.0186419	0.984573	ENSG00000124766.6	SOX4	1.9146	1.79068	-0.118496	0.610983
chr2_32356868_32357268	8.60004	7.95785	-0.64219	-0.442089	0.525371	ENSG00000115760.14	BIRC6	3.62503	2.76604	-1.38062	0.0192039
chr7_135662245_135662645	7.26461	7.08623	-0.178373	0.0137802	0.988994	ENSG00000243317.7	STMP1	3.98595	3.97874	-0.0159441	0.945028
chr11_64284639_64285039	5.26973	5.54991	0.28018	0.487432	0.394495	ENSG00000002330.13	BAD	4.45986	5.13151	0.653156	0.0388684
chr3_31981193_31981593	7.34183	6.95547	-0.59153	-0.17209	0.829934	ENSG00000144645.13	OSBPL10	4.53769	4.30941	0.0926588	0.611895
chr1_155244512_155244912	6.21972	6.57201	0.352293	0.542922	0.293979	ENSG00000177628.15	GBA	6.13518	5.34138	-0.765701	0.00671116
chr7_100483288_100483688	5.25151	5.43797	0.186462	0.386243	0.538756	ENSG00000166924.8	NYAP1	-1.66169	-1.1088	0.965023	0.153336
chr2_233566574_233566974	5.27803	5.61961	0.341587	0.512656	0.345466	ENSG00000085982.13	USP40	2.28534	2.56963	0.232875	0.339033
chr9_114098214_114098614	4.94587	5.26034	0.314467	0.49863	0.405414	ENSG00000136883.14	KIF12	-1.60545	-2.66096	-1.68243	0.209079
chr1_26336556_26336956	4.23568	4.2527	0.0170137	0.14511	0.884591	ENSG00000176092.15	CRYBG2	0.438283	-0.225042	0.107531	0.870289
chr15_65133655_65134055	4.5342	5.12217	0.587966	0.759778	0.162576	ENSG00000090470.14	PDCD7	3.7845	4.59788	0.902646	0.00308256
chrX_17374934_17375334	6.03936	6.10323	-0.728165	0.271055	0.680435	ENSG00000188158.15	NHS	1.8717	1.38367	-0.553959	0.0481611
chr22_38872056_38872456	4.31313	4.43126	0.118131	0.26914	0.750515	ENSG00000183741.11	CBX6	5.01652	4.35874	-0.598651	0.00663656
chr2_135741448_135741848	7.3748	7.18959	-0.185209	0.0169366	0.987014	ENSG00000144224.16	UBXN4	3.84683	4.33865	0.478822	0.0247651
chr7_129054890_129055290	6.32501	6.34791	0.022905	0.239152	0.72885	ENSG00000064419.13	TNPO3	5.08148	5.23514	0.203735	0.236489
chr12_57487765_57488165	5.82795	6.3602	0.532247	0.743908	0.109789	ENSG00000166986.14	MARS	6.75758	6.65497	0.0231588	0.893342
chr9_35096114_35096514	5.62638	5.85893	0.232548	0.448326	0.426956	ENSG00000165282.13	PIGO	4.20988	4.13884	-0.157478	0.380397
chr11_2377036_2377436	2.69848	3.80837	1.10989	1.23814	0.121036	ENSG00000110651.11	CD81	7.46425	7.77383	0.332763	0.0511013
chr20_20017026_20017426	6.95154	6.25395	-0.69759	-0.497844	0.359795	ENSG00000173418.11	NAA20	5.76823	6.13533	0.339487	0.073145
chr3_33798857_33799257	8.03048	7.6574	-0.373081	-0.172991	0.840383	ENSG00000170248.14	PDCD6IP	6.35732	6.17046	-0.0858354	0.591247
chr5_141636717_141637117	7.28086	7.19366	-0.087199	0.114978	0.894904	ENSG00000164620.8	RELL2	2.42382	1.21246	-1.14467	0.00862313
chr19_54102593_54102993	4.88242	5.02435	0.141931	0.370714	0.600242	ENSG00000170906.15	NDUFA3	6.99072	6.85903	-0.0618997	0.781018
chr3_152269260_152269660	7.25721	7.20007	-0.471322	0.146065	0.860271	ENSG00000152601.17	MBNL1	3.91142	2.63858	-1.13788	0.00212253
chr9_33816774_33817174	5.95175	6.10629	0.154539	0.343946	0.567246	ENSG00000107341.4	UBE2R2	4.09914	4.5674	0.478818	0.049747
chrX_47514525_47514925	4.52001	3.86117	-0.38061	-0.394609	0.627888	ENSG00000235636.1	NUS1P1	1.18346	1.34396	0.209078	0.727861
chr8_731077_731477	7.03578	6.45119	-0.717849	-0.369609	0.549685	ENSG00000104714.13	ERICH1	3.47625	2.89116	-0.563519	0.0477048
chr1_155745420_155745820	5.37054	5.87596	0.505416	0.725396	0.134651	ENSG00000203761.5	MSTO2P	1.95423	1.49525	-0.458159	0.196662
chr14_34873519_34873919	4.97557	5.15113	0.175566	0.394115	0.557493	ENSG00000258738.1	AL121603.2	-0.840191	-1.5367	-0.901152	0.20215
chr2_15561076_15561476	6.41109	6.03217	-0.959817	-0.183691	0.800855	ENSG00000151779.12	NBAS	3.46801	3.84934	-0.211413	0.346768
chr7_22822632_22823032	5.73439	5.73687	0.00247557	0.188166	0.796777	ENSG00000196683.10	TOMM7	9.32771	9.01963	-0.219184	0.180234
chr14_104752616_104753016	7.37074	7.2447	-0.126042	0.0638697	0.945635	ENSG00000184990.12	SIVA1	6.56241	6.80825	0.259744	0.173413
chr16_69339456_69339856	5.77502	6.16484	0.389824	0.588988	0.235932	ENSG00000132603.14	NIP7	5.10928	5.29159	0.233585	0.21581
chr7_100247350_100247750	5.68511	5.41167	-0.325266	-0.0658542	0.941974	ENSG00000239521.8	CASTOR3	2.82022	1.763	-1.21365	0.00609618
chr1_96721528_96721928	7.94423	7.49566	-0.448575	-0.239991	0.758229	ENSG00000117569.18	PTBP2	2.9278	2.37446	-0.479009	0.0712395
chr12_77065472_77065872	8.64468	7.70897	-0.935712	-0.739275	0.193807	ENSG00000165891.15	E2F7	2.74148	2.66702	0.160783	0.51556
chr18_59359176_59359576	6.89073	6.7283	-0.162428	0.0521262	0.955623	ENSG00000074695.5	LMAN1	4.78814	4.54439	-0.283497	0.0926573
chr9_124771262_124771662	6.64771	6.9762	0.328495	0.515573	0.343075	ENSG00000148200.16	NR6A1	1.92105	3.09135	0.981036	0.0063002
chrX_119606277_119606677	5.35494	5.54117	0.186223	0.389008	0.526852	ENSG00000186416.14	NKRF	4.27652	4.39572	0.0729918	0.687917
chr18_47150314_47150714	5.79728	5.38311	-0.414174	-0.174346	0.825702	ENSG00000167220.11	HDHD2	3.1989	3.06946	-0.0321587	0.918352
chr21_44817584_44817984	4.55623	5.50661	0.950375	1.13428	0.0141635	ENSG00000184900.15	SUMO3	6.08369	5.80147	-0.273293	0.142707
chr12_12927543_12927943	5.99436	6.06237	0.0680036	0.238921	0.721667	ENSG00000247498.9	GPRC5D-AS1	1.62036	2.91069	1.26109	0.0453432
chr19_57681704_57682104	3.46178	4.64238	1.1806	1.33555	0.0140818	ENSG00000204519.10	ZNF551	-0.194555	0.580557	0.853759	0.0419649
chr10_5977488_5977888	5.74622	5.55478	-0.19144	0.0390761	0.96705	ENSG00000134470.20	IL15RA	2.29252	1.78235	-0.517795	0.158383
chr7_127651791_127652191	9.06062	8.55788	-0.997967	-0.307972	0.719156	ENSG00000197157.10	SND1	7.67553	7.22048	-0.441268	0.0165346
chr11_20387380_20387780	6.97393	6.68389	-0.290044	-0.074292	0.934089	ENSG00000185238.12	PRMT3	4.2645	4.35239	0.177959	0.338383
chr4_153466074_153466474	6.52338	6.20971	-0.313667	-0.150603	0.844159	ENSG00000121210.15	TMEM131L	3.22187	3.30448	0.142304	0.457961
chr1_53196581_53196981	6.18341	6.14467	-0.0387443	0.175284	0.813279	ENSG00000157184.6	CPT2	5.04768	4.94776	-0.105679	0.545419
chr6_26271179_26271579	4.76524	4.87563	0.110393	0.286553	0.708544	ENSG00000273983.1	HIST1H3G	-1.30192	-0.576002	0.902017	0.159333
chrX_9164574_9164974	6.33346	6.3903	-0.124725	0.270872	0.683319	ENSG00000177138.15	FAM9B	-1.82918	-1.87719	-0.260904	0.77669
chr6_43769901_43770301	6.14643	6.26542	0.118992	0.311054	0.617805	ENSG00000112715.21	VEGFA	5.33233	5.7399	0.348181	0.0524596
chr3_23806112_23806512	4.75069	4.82255	-0.758432	0.207825	0.802862	ENSG00000170142.11	UBE2E1	6.01407	6.24534	0.187171	0.352333
chr6_122399302_122399702	8.16998	7.6047	-0.565279	-0.383876	0.57489	ENSG00000025156.12	HSF2	3.05294	3.60513	0.581424	0.0315808
chr10_97640347_97640747	7.22544	7.45759	0.232151	0.438691	0.475204	ENSG00000155252.13	PI4K2A	4.33976	4.45182	0.121664	0.488324
chrX_154653138_154653538	3.01349	3.07605	0.0625611	0.297732	0.848476	ENSG00000126890.13	CTAG2	8.87673	8.96388	0.121594	0.425323
chr5_111757312_111757712	7.95785	7.61859	-0.576006	-0.164874	0.848374	ENSG00000134986.13	NREP	4.11365	3.80233	-0.310958	0.21753
chr7_1537171_1537571	6.13946	6.14424	0.369702	0.209742	0.766951	ENSG00000198517.9	MAFK	5.09406	5.72072	0.699635	0.005356
chr14_23006958_23007358	6.05425	6.34208	0.567997	0.485493	0.362456	ENSG00000100802.14	C14orf93	3.17035	2.54308	-0.535787	0.0736124
chr1_160031751_160032151	7.08037	6.55557	-0.524804	-0.325434	0.613135	ENSG00000143315.7	PIGM	1.03903	0.33051	-0.747364	0.0230308
chr9_15307123_15307523	7.75928	7.10125	-0.257463	-0.452069	0.46325	ENSG00000155158.20	TTC39B	-1.02406	-1.02495	-0.645665	0.273777
chr19_782465_782865	5.02211	5.08245	0.0603441	0.24894	0.744487	ENSG00000267530.2	LINC01836	3.04925	2.37113	-0.618067	0.124182
chr4_6269539_6269939	6.42001	6.38861	-0.0314038	0.177116	0.81229	ENSG00000109501.13	WFS1	3.58968	4.53745	1.04724	0.00162629
chr7_100693921_100694321	3.64441	3.7003	0.0558883	0.171673	0.883958	ENSG00000146830.10	GIGYF1	3.94919	3.48351	-0.542083	0.0199673
chr20_2102152_2102552	5.62363	5.73658	0.112953	0.321687	0.612638	ENSG00000125834.12	STK35	2.78953	2.23268	-0.558138	0.0179106
chr10_78033583_78033983	6.41203	6.86452	0.452489	0.66287	0.182111	ENSG00000138326.19	RPS24	11.6674	11.4419	-0.166007	0.285725
chr11_65637817_65638217	5.98425	6.03864	0.0543912	0.282232	0.667443	ENSG00000213445.9	SIPA1	4.52475	4.27253	-0.0912042	0.620043
chr1_16960795_16961195	4.09405	5.22473	0.0120656	1.28785	0.00751509	ENSG00000058453.16	CROCC	2.45279	2.41634	0.271864	0.269287
chr15_45634607_45635007	6.79387	5.99916	-1.02357	-0.607588	0.22063	ENSG00000137767.13	SQOR	4.31121	3.97857	-0.36418	0.105133
chr1_11980044_11980444	6.88238	6.89604	0.0136631	0.220318	0.764619	ENSG00000116688.16	MFN2	5.28609	5.91153	0.662831	0.00433894
chr9_97922276_97922676	6.07856	6.39023	0.261262	0.515824	0.324224	ENSG00000136932.13	TRMO	4.03877	3.92358	-0.0152714	0.955394
chr6_31114534_31114934	4.47974	4.40876	-0.0366898	0.177668	0.852534	ENSG00000204540.10	PSORS1C1	2.96408	2.5469	-0.405955	0.359393
chr2_64988968_64989368	6.23988	5.85507	-0.384816	-0.178658	0.809148	ENSG00000115902.10	SLC1A4	1.82859	2.15967	0.236039	0.338301
chr12_56521626_56522026	5.05272	5.62274	0.570014	0.78295	0.112457	ENSG00000076067.12	RBMS2	3.80393	4.47246	0.380626	0.0535549
chr6_108848222_108848622	6.74081	6.62353	-0.117286	0.0901716	0.91607	ENSG00000118690.12	ARMC2	0.990342	2.30704	1.1105	0.0203784
chr22_42269870_42270270	4.56288	4.85836	0.295481	0.458575	0.491767	ENSG00000182057.4	OGFRP1	0.440793	-0.388969	-0.52502	0.502571
chr17_44186624_44187024	5.9763	6.59613	0.619829	0.811784	0.0714989	ENSG00000168591.15	TMUB2	4.37697	2.87474	-1.50912	0.00103472
chr17_43006597_43006997	3.75912	4.31873	0.559605	0.753827	0.25123	ENSG00000068079.7	IFI35	5.16872	4.61684	-0.52496	0.0298371
chr4_88379026_88379426	5.07478	4.73157	-0.716625	-0.133462	0.883958	ENSG00000138642.14	HERC6	1.92939	1.16761	-0.45131	0.135234
chr6_159969127_159969527	4.87757	4.58754	-0.290032	-0.146036	0.872515	ENSG00000197081.13	IGF2R	5.22357	4.15657	-1.24528	0.00163565
chr6_10521124_10521524	7.57384	6.80366	-0.662469	-0.594281	0.267512	ENSG00000111846.17	GCNT2	4.19029	3.21888	-0.859705	0.00430905
chr3_43690696_43691096	7.26909	6.86214	-0.523617	-0.229642	0.753131	ENSG00000011198.9	ABHD5	4.27016	4.84263	0.495419	0.0287132
chr8_22178883_22179283	5.67088	4.14756	-0.586172	-1.28279	0.00756813	ENSG00000168487.18	BMP1	5.13883	4.18893	-0.926153	0.00213015
chr20_43914613_43915013	4.45667	4.00164	-0.455031	-0.295062	0.730375	ENSG00000124191.17	TOX2	2.80999	1.95285	-0.8569	0.0245409
chr12_123458459_123458859	4.93665	4.66762	-0.269028	-0.0461235	0.965411	ENSG00000184209.14	SNRNP35	4.85908	4.61007	-0.193492	0.393721
chr17_63550099_63550499	6.70572	6.83653	0.130808	0.324082	0.612638	ENSG00000136485.14	DCAF7	5.90158	6.30758	-0.391412	0.0286676
chr9_129642162_129642562	6.20646	6.6222	0.415744	0.593118	0.233142	ENSG00000148331.11	ASB6	4.64498	5.12684	0.512242	0.0178454
chr16_2047679_2048079	5.92763	6.17034	0.242714	0.443857	0.420641	ENSG00000065057.7	NTHL1	5.64475	5.91898	0.278768	0.147408
chr1_38941679_38942079	4.08471	3.80892	-0.275793	-0.121884	0.912997	ENSG00000158315.10	RHBDL2	0.867588	0.855968	0.244487	0.633764
chr1_112707236_112707636	7.26365	7.10764	-0.38262	0.0339035	0.972261	ENSG00000155366.16	RHOC	8.21844	8.03936	-0.118955	0.434092
chr18_63320030_63320430	5.88087	5.13737	-0.862044	-0.615938	0.217249	ENSG00000171791.12	BCL2	1.5792	0.953214	-0.509606	0.065531
chr11_126062744_126063144	7.18244	6.78806	-0.570959	-0.189925	0.804701	ENSG00000064309.14	CDON	2.87539	1.93924	-0.986882	0.00701297
chr10_97401169_97401569	6.597	6.52226	-0.0945516	0.127442	0.874193	ENSG00000052749.13	RRP12	5.18417	5.75969	0.556537	0.0174466
chr17_44324663_44325063	5.48771	5.64968	0.16197	0.34865	0.573495	ENSG00000013306.15	SLC25A39	8.70279	8.53522	-0.173959	0.246863
chr22_23894113_23894513	5.72562	6.53859	0.812974	1.01501	0.0163112	ENSG00000240972.1	MIF	10.146	10.0231	-0.199079	0.188036
chr3_150546460_150546860	8.01602	7.86051	-0.216805	0.0540427	0.957861	ENSG00000120742.10	SERP1	6.15296	6.40291	0.172597	0.298993
chr16_1493051_1493451	4.93712	5.08287	0.14575	0.333406	0.634877	ENSG00000100726.14	TELO2	5.10371	5.40622	0.31588	0.094084
chr1_235504438_235504838	8.47737	8.3662	-0.11117	0.0753983	0.942949	ENSG00000162885.12	B3GALNT2	4.13483	4.4252	0.282285	0.159532
chr2_111120648_111121048	6.52331	6.7282	0.118649	0.392842	0.506951	ENSG00000153094.22	BCL2L11	3.24179	3.71658	0.324746	0.110454
chr7_32942969_32943369	6.69021	6.08344	-0.606771	-0.377154	0.532523	ENSG00000205763.13	RP9P	2.56552	3.78575	1.25683	0.00348025
chr2_85418327_85418727	5.79972	6.0278	-0.0455018	0.411832	0.464841	ENSG00000042493.15	CAPG	8.31206	7.94089	-0.394853	0.0275003
chr10_95290830_95291230	6.90727	6.2118	-0.443388	-0.501351	0.354979	ENSG00000107438.8	PDLIM1	6.94104	5.75431	-1.15858	0.00110843
chr9_124256466_124256866	5.28912	4.7818	-0.237859	-0.2525	0.753596	ENSG00000119408.16	NEK6	5.15577	5.58464	0.451881	0.0448957
chrX_16786113_16786513	8.29419	7.84095	-0.969432	-0.253534	0.752013	ENSG00000086712.12	TXLNG	4.32327	4.68359	0.37925	0.0668224
chr14_69152990_69153390	5.65861	5.08796	-0.570657	-0.382645	0.538594	ENSG00000139990.17	DCAF5	3.61336	3.62161	0.0939938	0.612446
chr20_25623785_25624185	7.114	6.97464	-0.13936	0.0819109	0.92674	ENSG00000170191.4	NANP	1.8434	1.55005	-0.29809	0.262322
chr17_40062719_40063119	4.42211	4.58783	0.165723	0.342978	0.655122	ENSG00000126351.12	THRA	4.13979	3.88127	-0.292236	0.111502
chr5_169583518_169583918	6.80578	6.68282	-0.209179	0.0689052	0.938305	ENSG00000040275.16	SPDL1	4.68289	3.88822	-0.668991	0.00972779
chr19_3500585_3500985	4.36442	5.18551	0.821087	0.9819	0.0509603	ENSG00000129932.8	DOHH	3.39682	4.15726	0.778326	0.00773075
chrX_46447044_46447444	5.16199	4.57583	-0.586157	-0.386472	0.580601	ENSG00000147121.15	KRBOX4	2.79178	3.10774	0.497353	0.0900481
chr2_66434911_66435311	6.56492	6.57283	-0.52825	0.23413	0.741188	ENSG00000143995.19	MEIS1	2.44589	1.60655	-1.28005	0.00621364
chr1_19799560_19799960	4.2918	3.99539	-0.296407	-0.106469	0.921618	ENSG00000162542.13	TMCO4	3.51889	3.36729	-0.135791	0.541651
chr15_22664318_22664718	1.54578	2.83365	1.28787	1.41864	0.362557	ENSG00000276141.4	WHAMMP3	-0.305767	0.141072	0.43224	0.418216
chr11_2885634_2886034	6.94068	6.74979	-0.190892	-0.0266594	0.978077	ENSG00000129757.13	CDKN1C	4.5438	4.23812	-0.32059	0.431818
chr1_224356646_224357046	7.61335	7.32615	-0.287199	-0.0936075	0.918554	ENSG00000143771.11	CNIH4	6.2634	6.74346	0.336576	0.0761621
chr21_17512586_17512986	8.20712	7.68943	-0.517684	-0.328468	0.651765	ENSG00000154639.18	CXADR	3.47062	3.95801	0.359716	0.100152
chr10_6088768_6089168	6.42301	6.18524	0.14394	-0.0231116	0.981233	ENSG00000134453.15	RBM17	6.23104	7.01731	0.744695	0.00354902
chr2_169584186_169584586	5.82384	5.82104	-0.00279907	0.18668	0.797479	ENSG00000138398.15	PPIG	3.36014	3.81514	0.458995	0.0476196
chr11_66616284_66616684	7.10313	7.26192	0.158793	0.359595	0.578097	ENSG00000239306.4	RBM14	5.89855	6.33206	0.430519	0.0502643
chr1_36450347_36450747	6.05604	5.3908	-0.665245	-0.493635	0.353458	ENSG00000116885.18	OSCP1	2.16246	1.55311	-0.553623	0.200815
chr20_3470855_3471255	4.80122	4.52843	-0.272788	-0.0603255	0.954861	ENSG00000088812.17	ATRN	3.91409	3.1619	-0.545853	0.0357734
chr11_14358527_14358927	6.68094	6.28611	-0.33049	-0.207513	0.771651	ENSG00000133818.13	RRAS2	5.51614	5.72354	0.0450054	0.840493
chr1_58546562_58546962	9.28631	9.00629	-0.546369	-0.0910811	0.935974	ENSG00000162600.11	OMA1	4.8143	4.56704	-0.294364	0.144411
chr20_44311064_44311464	4.89332	5.22147	0.328158	0.506573	0.396383	ENSG00000197296.5	FITM2	1.90162	1.59692	-0.305155	0.364331
chr3_186806370_186806770	5.60159	5.67297	0.0713803	0.296213	0.655353	ENSG00000163918.10	RFC4	5.47534	5.76995	0.28404	0.150057
chr16_28292264_28292664	3.89168	4.46774	0.576057	0.719742	0.256387	ENSG00000188322.4	SBK1	-2.79364	-2.43493	1.13004	0.217871
chr1_109620829_109621229	6.60188	5.84498	-0.33419	-0.531176	0.312868	ENSG00000116337.15	AMPD2	6.10486	6.37269	0.201165	0.19011
chr14_64704145_64704545	5.27101	4.75959	-0.548368	-0.291594	0.698079	ENSG00000126822.16	PLEKHG3	4.3644	3.70187	-0.531309	0.0166471
chr1_99970063_99970463	8.33297	7.7867	-0.680447	-0.334536	0.649266	ENSG00000117620.14	SLC35A3	3.43517	4.08728	0.0791174	0.700276
chr14_36582289_36582689	4.2039	3.17395	-1.02996	-0.832696	0.260247	ENSG00000136327.6	NKX2-8	-1.13267	-1.31297	-0.249421	0.79898
chr8_116755664_116756064	6.33011	6.14012	-0.189995	-0.00671282	0.994058	ENSG00000147677.10	EIF3H	7.90596	7.70321	-0.156314	0.352998
chr11_108593588_108593988	6.15603	5.48162	-0.651062	-0.508759	0.327273	ENSG00000110723.11	EXPH5	-1.91414	-2.13824	-0.255675	0.703453
chr4_103198226_103198626	6.89222	6.49852	-0.3937	-0.189671	0.799585	ENSG00000138778.11	CENPE	0.226245	0.851329	0.30001	0.274039
chr2_37156835_37157235	6.69529	6.45867	-0.236621	-0.0412778	0.964409	ENSG00000055332.17	EIF2AK2	4.12562	5.19459	0.317255	0.0795246
chrX_49191109_49191509	7.62439	7.53368	0.00793768	0.108461	0.904083	ENSG00000012211.12	PRICKLE3	4.66962	3.99458	-0.610561	0.014626
chr17_80414981_80415381	5.58157	5.72768	0.146109	0.334684	0.590235	ENSG00000173818.16	ENDOV	4.06778	4.36426	0.352601	0.143456
chr11_77994683_77995083	7.87627	7.68543	-0.190839	0.0116428	0.990963	ENSG00000149262.16	INTS4	4.21792	4.79502	0.459056	0.029293
chr4_153222920_153223320	5.62327	5.65825	-0.448535	0.214284	0.763355	ENSG00000109654.14	TRIM2	2.17496	1.37495	-0.806238	0.0219541
chr13_39655507_39655907	6.10531	5.64431	-0.461005	-0.267882	0.683226	ENSG00000133103.16	COG6	3.605	2.14942	0.283409	0.262973
chrX_150898519_150898919	7.29907	7.1391	-0.159977	0.0505256	0.957861	ENSG00000102181.20	CD99L2	4.39798	4.26005	-0.101343	0.578638
chr15_63048192_63048592	6.68404	6.93626	0.252212	0.458013	0.423604	ENSG00000140416.20	TPM1	6.34039	6.35582	0.0442965	0.809363
chr1_151006662_151007062	5.09892	5.32875	0.229829	0.447204	0.471572	ENSG00000143409.15	MINDY1	2.49899	2.13584	-0.407466	0.217632
chr3_49802904_49803304	5.82059	5.76787	-0.0527178	0.15192	0.844314	ENSG00000185614.4	INKA1	0.268723	-0.458921	-0.787275	0.244523
chr16_46973522_46973922	6.08884	5.68761	-0.40123	-0.180296	0.809347	ENSG00000069345.11	DNAJA2	5.83252	6.50305	0.643054	0.00505446
chr10_97318899_97319299	6.04398	6.23438	0.190395	0.385424	0.505074	ENSG00000165879.8	FRAT1	0.513683	0.213374	-0.399315	0.471043
chr15_77420099_77420499	6.97254	6.98076	0.00822344	0.199875	0.790682	ENSG00000140382.14	HMG20A	3.78397	3.27182	-0.588983	0.0166338
chr11_67022565_67022965	5.50904	4.44694	-0.205177	-0.865716	0.0910379	ENSG00000173227.13	SYT12	5.08102	4.21022	-0.760486	0.0039934
chr12_96194241_96194641	5.02766	4.53819	-0.489466	-0.328674	0.654595	ENSG00000111145.7	ELK3	3.34127	2.84451	-0.418689	0.060365
chr17_9837895_9838295	4.6948	4.59975	-0.501649	0.0808094	0.935974	ENSG00000065325.12	GLP2R	5.8713	4.10643	-1.65658	0.000380868
chr9_137053883_137054283	4.13813	3.63691	-0.0666319	-0.286565	0.769663	ENSG00000054179.11	ENTPD2	0.847329	-0.949848	-1.96689	0.0206475
chr1_223707171_223707571	7.37342	6.81507	-0.559691	-0.365037	0.567523	ENSG00000162909.17	CAPN2	6.4625	5.80486	-0.68561	0.00621643
chr11_83193519_83193919	7.62997	7.11386	-0.51611	-0.308775	0.655757	ENSG00000137494.13	ANKRD42	2.49688	2.87035	0.419808	0.0881101
chr22_45502596_45502996	4.58647	3.90669	-1.03218	-0.565698	0.406882	ENSG00000077942.18	FBLN1	7.26366	6.31504	-1.016	0.00158646
chr2_63840714_63841114	6.96851	6.85088	-0.117628	0.0839499	0.924217	ENSG00000169764.15	UGP2	6.03001	5.75033	-0.14232	0.397657
chr10_13586701_13587101	5.65325	5.42416	-0.229093	-0.0273434	0.977783	ENSG00000165630.13	PRPF18	2.94041	3.60411	0.644682	0.0288219
chr13_44436737_44437137	5.93908	5.63499	0.138391	-0.0892763	0.91633	ENSG00000102804.14	TSC22D1	6.53297	6.51106	-0.0176574	0.929434
chr16_1773274_1773674	4.76558	5.28168	0.516105	0.724248	0.180577	ENSG00000197774.12	EME2	1.98586	1.43637	-0.484261	0.1072
chr9_129835157_129835557	6.34061	6.5446	0.203992	0.408807	0.479239	ENSG00000136819.15	C9orf78	6.02096	6.76348	0.92335	0.00174045
chr16_87765797_87766197	5.0192	5.55901	0.405174	0.743985	0.140089	ENSG00000104731.13	KLHDC4	5.092	5.56321	0.572317	0.0211648
chr1_32817294_32817694	6.97997	7.10137	0.121398	0.307391	0.644062	ENSG00000116497.17	S100PBP	3.08586	3.6135	0.316914	0.164403
chr12_76559648_76560048	7.5888	7.24457	-0.344229	-0.154653	0.853752	ENSG00000091039.16	OSBPL8	2.67713	2.84352	0.242661	0.212466
chr2_127886263_127886663	5.90332	5.85424	-0.049072	0.140677	0.85637	ENSG00000272667.1	AC012306.2	1.67065	0.203867	-1.49968	0.046105
chr18_74148207_74148607	7.64163	7.25985	-0.381783	-0.186737	0.815563	ENSG00000075336.11	TIMM21	5.36124	5.28117	-0.0410328	0.865277
chr22_30326844_30327244	5.61638	5.96596	-0.329224	0.529069	0.304903	ENSG00000099992.15	TBC1D10A	3.35701	3.41345	0.0202422	0.941613
chr20_380575_380975	5.08855	5.18392	-0.185643	0.274749	0.706077	ENSG00000101255.10	TRIB3	5.4169	6.34349	0.971102	0.00209502
chr17_18780981_18781381	5.39355	5.50969	0.116142	0.315557	0.631089	ENSG00000171928.13	TVP23B	4.46896	5.0039	0.603435	0.013356
chr19_8592363_8592763	5.38803	6.19983	0.811801	1.00591	0.0178545	ENSG00000142303.13	ADAMTS10	2.81946	0.349776	-2.11109	0.00103606
chr1_61724977_61725377	8.13574	7.90427	-0.354225	-0.026347	0.981026	ENSG00000162604.12	TM2D1	5.86103	5.60905	-0.265829	0.173768
chr10_63465260_63465660	6.19128	5.44438	-0.746894	-0.559162	0.270074	ENSG00000272767.1	JMJD1C-AS1	-0.707519	-1.00116	-0.436712	0.573195
chr17_75154419_75154819	6.37376	6.92286	0.595156	0.746775	0.116134	ENSG00000189159.15	JPT1	9.18076	9.76632	0.677356	0.00437642
chr12_50084940_50085340	5.56466	6.20187	0.637215	0.841306	0.0597715	ENSG00000066117.14	SMARCD1	6.09201	6.52286	0.521011	0.0135112
chr11_288824_289224	3.70181	3.69989	-0.00192529	0.127469	0.916429	ENSG00000142102.15	PGGHG	2.82575	0.902522	-1.81098	0.00143891
chr16_15949307_15949707	3.00103	3.90747	0.906437	0.984027	0.199913	ENSG00000103222.18	ABCC1	4.02099	3.54926	-0.443216	0.0280459
chr6_131135357_131135757	6.94758	6.43781	-0.394211	-0.34296	0.580185	ENSG00000118507.16	AKAP7	0.796318	1.10079	0.0746629	0.882673
chr11_70270415_70270815	5.41348	5.86874	0.455268	0.659998	0.180915	ENSG00000131626.18	PPFIA1	3.75103	3.79976	0.0898601	0.645143
chr17_81703151_81703551	4.58272	5.41091	0.828192	0.999707	0.0369041	ENSG00000262049.1	AC139530.1	1.81121	2.23029	0.443062	0.258276
chr16_58495067_58495467	6.02401	5.43455	-0.0768174	-0.400453	0.488316	ENSG00000103034.14	NDRG4	-1.23937	-1.41619	-0.450769	0.597424
chr17_57256374_57256774	5.79077	5.60268	-0.602652	0.0124921	0.98938	ENSG00000153944.10	MSI2	4.90747	6.03301	0.243353	0.21131
chr2_191014062_191014462	6.80308	6.35747	-0.838302	-0.256386	0.706675	ENSG00000115415.18	STAT1	4.32077	4.48912	0.177394	0.307676
chr17_76540794_76541194	5.93475	6.17198	-0.03477	0.421622	0.450293	ENSG00000214140.10	PRCD	0.92536	0.148449	-1.03029	0.174887
chr8_22597394_22597794	6.04647	5.8117	0.00363301	-0.0377099	0.967041	ENSG00000241852.9	C8orf58	3.15265	4.03824	0.837646	0.0117608
chrX_154443957_154444357	4.80993	4.68239	-0.127535	0.040027	0.969501	ENSG00000071859.14	FAM50A	6.61715	6.77997	0.185034	0.311013
chr7_75073632_75074032	5.85468	6.2315	0.376822	0.595912	0.234402	ENSG00000274523.4	RCC1L	5.72129	6.21984	0.546164	0.00977185
chr9_127451212_127451612	5.54276	6.15026	0.607491	0.794937	0.0783661	ENSG00000148356.13	LRSAM1	3.28529	3.14204	-0.145611	0.534057
chr20_10034817_10035217	7.02444	6.63094	-0.3935	-0.184974	0.808923	ENSG00000132623.15	ANKEF1	2.33388	2.56621	0.265199	0.25815
chr7_150400114_150400514	7.00303	5.67608	-0.697994	-1.11318	0.00845455	ENSG00000284691.1	AC073111.5	0.95229	1.11149	-0.211173	0.711169
chr2_201149101_201149501	5.14207	4.99083	-0.191875	0.0376624	0.970113	ENSG00000003402.19	CFLAR	3.59311	3.77624	-0.00914639	0.971655
chr16_88570085_88570485	5.27131	5.63299	0.361676	0.510748	0.345136	ENSG00000158545.15	ZC3H18	5.26986	5.4661	0.19188	0.279531
chr17_43778309_43778709	5.75136	6.13208	0.380713	0.591844	0.236443	ENSG00000108861.8	DUSP3	4.92056	4.85349	-0.412048	0.0334608
chr16_4767095_4767495	6.72931	6.67526	0.160918	0.1447	0.855689	ENSG00000103199.13	ZNF500	3.38511	3.10138	-0.15151	0.481481
chr2_73737218_73737618	6.29976	6.2054	-0.094364	0.118169	0.883334	ENSG00000144034.14	TPRKB	5.4921	5.78997	0.353621	0.109609
chrX_118975993_118976393	6.4723	5.41516	-0.636004	-0.82085	0.0754133	ENSG00000175556.16	LONRF3	3.69568	4.23324	0.493196	0.0301119
chr17_43398708_43399108	3.24452	3.64642	0.401899	0.592672	0.538226	ENSG00000175906.4	ARL4D	4.4957	3.8159	-0.669495	0.0143075
chr3_197791258_197791658	5.7773	5.62965	-0.147642	0.0200982	0.983503	ENSG00000186001.13	LRCH3	4.099	4.62872	0.443846	0.0310444
chr18_11857286_11857686	5.52615	5.4863	-0.00316634	0.178038	0.818708	ENSG00000141404.15	GNAL	3.92909	4.13821	0.552318	0.022379
chrX_151974493_151974893	5.88652	5.51698	-0.62858	-0.156493	0.840935	ENSG00000102287.18	GABRE	4.26179	3.21068	-1.21286	0.00134928
chrX_107775707_107776107	6.59223	5.57218	-0.740266	-0.828786	0.0627116	ENSG00000157514.16	TSC22D3	3.28136	2.85564	-0.472627	0.085658
chr1_110034356_110034756	6.98795	6.78111	0.00972555	0.00375989	0.996896	ENSG00000143093.14	STRIP1	4.94274	4.75032	-0.142937	0.45625
chr2_72825797_72826197	5.84558	6.1404	-0.280524	0.506272	0.339414	ENSG00000144036.15	EXOC6B	2.69706	2.77165	0.123063	0.534355
chr10_97498535_97498935	7.89315	7.95952	0.471938	0.268951	0.728207	ENSG00000155229.20	MMS19	5.9056	5.93561	-0.010279	0.954567
chr17_75998304_75998704	5.67752	4.64354	-1.03398	-0.779033	0.145341	ENSG00000250506.7	CDK3	2.36714	2.56876	0.283223	0.377175
chr16_2009650_2010050	4.95678	5.77421	1.02325	1.00799	0.0241806	ENSG00000167962.13	ZNF598	5.78917	6.25732	0.438034	0.0219887
chrX_153732398_153732798	4.09151	2.69791	-1.3936	-1.21402	0.104772	ENSG00000101986.11	ABCD1	5.04023	4.10143	-1.07734	0.00134928
chr12_104303483_104303883	3.99365	3.95862	-0.0350323	0.14471	0.893839	ENSG00000255150.2	EID3	-1.32238	-0.0595985	1.53223	0.0460037
chr6_31814941_31815341	6.03564	6.26236	0.226719	0.431322	0.440385	ENSG00000204390.9	HSPA1L	0.290073	0.373328	0.107103	0.823163
chr17_1649115_1649515	5.61775	6.49586	0.878105	1.08759	0.00929338	ENSG00000167705.11	RILP	3.70055	3.17426	-0.433291	0.128114
chr14_23286048_23286448	6.89447	6.63075	-0.263714	-0.0532759	0.954356	ENSG00000215271.7	HOMEZ	3.751	3.16128	-0.597008	0.0453924
chr16_67968487_67968887	5.12507	5.20929	0.0842239	0.290406	0.687138	ENSG00000124067.16	SLC12A4	4.96738	4.70128	-0.342044	0.0808095
chr4_118685180_118685580	6.81549	6.29328	-0.522214	-0.33166	0.594582	ENSG00000145388.14	METTL14	2.22461	2.96057	0.367664	0.185911
chr16_54929063_54929463	7.98163	7.66667	-0.314961	-0.120115	0.895225	ENSG00000245694.9	CRNDE	4.50191	4.48219	0.0503405	0.88438
chr8_27993417_27993817	4.49792	3.853	0.0686141	-0.415162	0.601091	ENSG00000168079.16	SCARA5	2.3029	1.35896	-1.05463	0.0131242
chr18_58863489_58863889	4.5449	4.11414	-0.430766	-0.241456	0.785623	ENSG00000074657.13	ZNF532	3.23369	2.51146	-0.842451	0.00772079
chr7_48088975_48089375	7.67223	7.41026	-0.291657	-0.0559936	0.954846	ENSG00000183696.13	UPP1	4.73699	6.01009	1.25019	0.00106502
chr17_42276216_42276616	3.08142	3.86144	0.780022	0.922916	0.241045	ENSG00000173757.9	STAT5B	4.89396	4.65731	-0.0970999	0.608185
chr10_119596958_119597358	7.8676	7.74579	-0.121815	0.077976	0.935316	ENSG00000151923.17	TIAL1	5.7658	6.53327	0.62681	0.00839665
chrX_119852897_119853297	7.16233	7.17545	0.013119	0.21221	0.779832	ENSG00000125351.11	UPF3B	2.64678	4.08063	1.4877	0.00110843
chr15_74193276_74193676	5.43727	4.40723	-0.362798	-0.774058	0.173171	ENSG00000137868.18	STRA6	3.48735	2.13776	-1.42703	0.00174045
chr8_27634011_27634411	3.00217	3.32032	0.318148	0.505415	0.677793	ENSG00000168077.13	SCARA3	3.46716	1.8267	-1.57416	0.0011183
chr17_3944684_3945084	5.2515	5.75143	0.499931	0.695206	0.157681	ENSG00000074370.17	ATP2A3	2.74973	2.11066	-0.675856	0.0153788
chr16_74606939_74607339	6.34392	6.20036	-0.622663	0.0400914	0.964716	ENSG00000090863.11	GLG1	5.87822	5.73229	-0.326797	0.0565879
chr2_73233177_73233577	7.42324	7.663	0.239757	0.432264	0.493497	ENSG00000135617.3	PRADC1	4.83114	4.79833	-0.0172722	0.945028
chr2_206085957_206086357	6.4821	6.46371	-0.0183994	0.162926	0.829276	ENSG00000114933.15	INO80D	-0.589594	-0.262873	0.0323613	0.954261
chr12_56360124_56360524	7.45584	7.46376	0.00792388	0.217997	0.779589	ENSG00000170581.13	STAT2	4.50985	4.05975	-0.453598	0.0319253
chr3_58306108_58306508	6.11646	6.25809	0.141634	0.351721	0.560402	ENSG00000163684.11	RPP14	2.97635	2.98835	0.00653913	0.978088
chr12_109998961_109999361	5.17575	5.3215	0.145746	0.331825	0.619571	ENSG00000076513.16	ANKRD13A	4.45415	3.83781	-0.490924	0.0270513
chr1_114757891_114758291	7.55712	7.62072	0.0635947	0.274188	0.711117	ENSG00000009307.15	CSDE1	8.13128	8.08326	-0.0329156	0.845614
chr4_76213719_76214119	6.67296	6.48019	0.243555	0.0144092	0.988435	ENSG00000138760.9	SCARB2	5.18778	6.02043	0.440315	0.0294983
chr6_34236648_34237048	5.02066	5.28664	0.265976	0.454281	0.458592	ENSG00000137309.19	HMGA1	9.42258	8.81463	-0.599992	0.00797023
chr19_11924835_11925235	5.47001	5.67511	0.205097	0.406278	0.491767	ENSG00000196757.7	ZNF700	1.25662	1.56924	0.351393	0.24616
chr2_186485974_186486374	7.92702	7.47969	-0.376274	-0.248909	0.745306	ENSG00000065548.17	ZC3H15	4.65238	5.3257	0.686352	0.00652991
chr3_5187332_5187732	9.09676	8.75345	-0.673059	-0.144969	0.887921	ENSG00000134109.10	EDEM1	2.98478	3.58831	0.880012	0.0033257
chr16_81076937_81077337	6.96106	6.81734	-0.143717	0.0478443	0.959014	ENSG00000166455.13	C16orf46	-1.38946	-0.402074	0.107794	0.915062
chr16_2777141_2777541	4.79436	5.01528	0.220915	0.369211	0.590909	ENSG00000103363.14	ELOB	8.71288	8.74286	0.0971391	0.531119
chr19_52048751_52049151	4.5336	4.20135	-0.332249	-0.110403	0.914515	ENSG00000256087.6	ZNF432	-0.197964	0.423397	0.853816	0.0679747
chr11_134253282_134253682	7.27966	7.1123	-0.167355	0.0397204	0.967557	ENSG00000151498.11	ACAD8	3.65056	4.32924	0.679554	0.0109906
chr19_7535432_7535832	4.89464	5.34549	0.77297	0.615835	0.258809	ENSG00000032444.16	PNPLA6	5.29767	5.94148	0.574859	0.0103937
chr2_27353885_27354285	5.51987	4.49404	-1.02583	-0.865116	0.0844313	ENSG00000234072.1	AC074117.1	1.93731	1.46368	-0.193535	0.56422
chr6_34791809_34792209	4.86102	5.18927	0.328245	0.517371	0.388619	ENSG00000065060.16	UHRF1BP1	3.35252	2.62338	-0.701474	0.0158411
chr6_107459396_107459796	6.86865	6.84046	-0.028183	0.163807	0.833904	ENSG00000164494.11	PDSS2	2.87132	3.55739	0.564282	0.0300649
chr7_12686655_12687055	8.65569	7.96291	-0.692787	-0.498196	0.455394	ENSG00000122644.12	ARL4A	4.16851	4.2285	0.0273405	0.919839
chr1_211675535_211675935	8.30876	7.89494	-0.413816	-0.21445	0.798718	ENSG00000117650.12	NEK2	4.93628	5.26046	0.38417	0.0580348
chr16_16232317_16232717	4.33861	4.44225	0.103641	0.332155	0.681227	ENSG00000103226.17	NOMO3	2.49767	2.35576	-0.0222812	0.968779
chr2_74548839_74549239	5.37404	5.52543	0.151392	0.384327	0.54455	ENSG00000115325.13	DOK1	3.90718	3.32438	-0.662855	0.0269883
chr5_149272065_149272465	5.48363	5.17811	-0.468893	-0.0929986	0.917135	ENSG00000157510.13	AFAP1L1	2.08689	2.27676	0.249274	0.37436
chr2_70087116_70087516	4.95488	5.66492	0.710045	0.910458	0.051573	ENSG00000169564.6	PCBP1	8.54183	8.51857	-0.00956093	0.957108
chr1_54887046_54887446	6.81861	6.6013	-0.21731	-0.0123492	0.989734	ENSG00000116133.12	DHCR24	7.03592	6.99072	-0.0380838	0.866033
chr16_69132387_69132787	5.17556	5.4886	0.313039	0.510987	0.366986	ENSG00000141076.17	UTP4	6.55319	7.20696	0.640501	0.00462014
chr1_230426364_230426764	5.27906	5.0605	0.000442417	-0.0682328	0.942165	ENSG00000177614.10	PGBD5	1.57132	0.692854	-0.634225	0.0575823
chr12_74537632_74538032	8.14434	7.58918	-0.555158	-0.348171	0.623583	ENSG00000253719.3	ATXN7L3B	3.64143	3.29698	-0.340005	0.065689
chr10_7818231_7818631	6.47998	6.22808	-0.251906	-0.0555843	0.950143	ENSG00000165632.7	TAF3	1.93734	2.5782	0.665724	0.03881
chr11_67996810_67997210	5.40174	5.95982	0.394473	0.747996	0.108664	ENSG00000110057.7	UNC93B1	4.45979	4.24652	-0.187029	0.312518
chr8_125091544_125091944	6.24013	6.06919	-1.02343	0.00559288	0.995182	ENSG00000156831.7	NSMCE2	5.32956	5.49381	0.20251	0.351919
chr3_124730207_124730607	4.6026	5.07368	0.471077	0.631928	0.271108	ENSG00000114491.13	UMPS	5.25519	6.11475	0.555386	0.010657
chr17_2711638_2712038	5.48966	6.057	0.567335	0.77434	0.0941869	ENSG00000132361.16	CLUH	6.72874	6.74624	0.0329205	0.843668
chr11_65961427_65961827	5.31605	5.44461	0.128559	0.328498	0.618322	ENSG00000175467.14	SART1	5.57185	6.20902	0.488412	0.0152335
chr5_308552_308952	3.45329	3.64574	0.192446	0.3109	0.77771	ENSG00000249915.7	PDCD6	8.90824	8.98287	0.025007	0.882471
chr17_73192623_73193023	6.5771	6.43717	0.0146252	-0.0104986	0.990963	ENSG00000166685.11	COG1	4.39752	4.3427	-0.0109402	0.958659
chr9_128159862_128160262	5.85637	6.13736	0.28099	0.446279	0.409849	ENSG00000171159.4	C9orf16	5.91568	6.06694	0.215136	0.377183
chr16_5071707_5072107	5.15731	5.03234	-0.072031	0.0849296	0.927683	ENSG00000033011.12	ALG1	4.3194	4.93039	0.649607	0.0096432
chr13_113490676_113491076	7.21494	7.22563	0.0106822	0.222175	0.768781	ENSG00000150401.14	DCUN1D2	2.84674	3.52412	0.711604	0.0205408
chr8_30095252_30095652	4.60775	4.13439	-0.473362	-0.279876	0.740605	ENSG00000104660.18	LEPROTL1	5.44285	5.95884	-0.0757427	0.699152
chr5_160399814_160400214	7.0764	6.75767	-0.318731	-0.151057	0.849387	ENSG00000221886.3	ZBED8	-0.111485	-0.157366	-0.0385668	0.944013
chr15_90934994_90935394	6.66459	6.2051	-0.404248	-0.241318	0.727651	ENSG00000140553.17	UNC45A	5.79842	6.21292	0.500147	0.014369
chr1_26169682_26170082	4.74395	5.19793	0.453977	0.644422	0.24996	ENSG00000142684.8	ZNF593	6.13138	6.41275	0.311824	0.11724
chr1_201955192_201955592	7.43563	7.59859	0.162957	0.363031	0.586921	ENSG00000134375.10	TIMM17A	6.33252	7.93453	1.64822	0.000347695
chr13_113493301_113493701	5.2723	5.06152	-0.210779	0.01847	0.986145	ENSG00000150403.17	TMCO3	4.55892	4.19305	-0.436664	0.0348175
chr9_504457_504857	7.35648	6.83309	-0.501842	-0.332292	0.612638	ENSG00000107104.18	KANK1	4.34528	4.49224	-0.0293359	0.880936
chr12_79935019_79935419	8.47519	7.75927	-0.538212	-0.515607	0.421333	ENSG00000058272.18	PPP1R12A	3.96831	3.20388	-0.591973	0.0143297
chr8_23068924_23069324	5.17932	5.53245	0.353132	0.553327	0.312855	ENSG00000120889.12	TNFRSF10B	6.13409	6.37291	0.216938	0.297363
chr1_243105134_243105534	4.718	3.65088	-1.06711	-0.877281	0.146558	ENSG00000214837.8	LINC01347	-1.15773	-0.840191	0.378068	0.484682
chr8_123072438_123072838	7.94358	7.53589	-0.407684	-0.210001	0.796477	ENSG00000156787.16	TBC1D31	2.15802	2.48868	0.0743063	0.804837
chr6_26382892_26383292	5.4449	5.30241	-0.142496	0.0407135	0.966202	ENSG00000124508.16	BTN2A2	2.23822	2.47217	0.233827	0.392145
chr8_103298667_103299067	6.89556	6.36794	-0.509916	-0.363242	0.549685	ENSG00000164930.11	FZD6	3.36041	2.8056	-0.370246	0.113549
chr11_134331753_134332153	6.16309	5.92153	-0.241564	-0.0571415	0.948413	ENSG00000149328.14	GLB1L2	3.60997	3.71508	0.115921	0.557347
chr19_1592238_1592638	5.22309	5.78486	0.56177	0.720387	0.130971	ENSG00000071655.17	MBD3	5.79992	6.06643	0.308447	0.0679874
chr10_100529746_100530146	4.45969	4.35736	-0.102333	0.0870425	0.933939	ENSG00000166136.15	NDUFB8	8.29541	8.48468	0.220499	0.177908
chr8_129939723_129940123	8.04569	7.97374	-0.827187	0.134032	0.883334	ENSG00000153310.19	FAM49B	5.81093	6.33133	0.383665	0.0457938
chr4_182917295_182917695	5.36358	5.36422	0.000641866	0.159626	0.841761	ENSG00000129187.14	DCTD	5.49642	6.33433	0.873647	0.00289836
chr16_23510301_23510701	5.03169	4.70972	-0.321968	-0.131693	0.885562	ENSG00000103365.15	GGA2	4.78734	3.95554	-1.00402	0.0017745
chr11_72569973_72570373	4.69074	5.21292	0.522183	0.771244	0.165727	ENSG00000227467.3	LINC01537	2.63612	2.39047	-0.242693	0.360607
chr6_32128165_32128565	5.64499	6.08664	0.441645	0.630369	0.193354	ENSG00000213676.12	ATF6B	5.45935	4.08364	-1.55516	0.000573661
chr1_1399260_1399660	5.64539	6.09848	0.453091	0.628418	0.193114	ENSG00000221978.11	CCNL2	5.46343	5.53157	0.0971144	0.588808
chr1_211639351_211639751	6.98926	6.10619	-0.578512	-0.654133	0.191617	ENSG00000227764.1	LINC01693	1.54242	0.10644	-1.5341	0.0264138
chr17_68512227_68512627	7.33208	6.84942	-0.482664	-0.28358	0.68148	ENSG00000108946.14	PRKAR1A	6.52362	6.85462	0.277882	0.0873989
chr12_53054245_53054645	6.55479	7.04427	0.0895914	0.675525	0.173171	ENSG00000257337.6	AC068888.1	2.04018	0.776139	-1.44946	0.00587383
chr2_11155156_11155556	7.50033	7.4537	-0.611599	0.0953542	0.915825	ENSG00000162976.12	PQLC3	2.91862	2.68771	-0.228588	0.428446
chr2_231514246_231514646	6.29398	6.60161	0.307634	0.509447	0.33888	ENSG00000181798.2	LINC00471	-1.02346	-1.21915	-0.229473	0.782896
chr6_32153928_32154328	5.65943	5.40282	-0.256606	-0.039614	0.966888	ENSG00000221988.12	PPT2	5.75972	5.67004	0.014888	0.944734
chr11_118997826_118998226	5.32181	5.63176	0.203716	0.485129	0.379794	ENSG00000186166.8	CCDC84	3.42491	4.30581	0.982155	0.00593076
chr19_3761510_3761910	4.21287	4.58316	0.370286	0.513607	0.450271	ENSG00000011132.11	APBA3	3.62104	3.70988	0.0960706	0.696621
chrX_14873097_14873497	9.19716	8.77257	-0.42459	-0.244003	0.795889	ENSG00000130150.11	MOSPD2	2.61966	1.92002	-0.703543	0.0230752
chr1_119648082_119648482	8.51203	7.99303	-0.476783	-0.309428	0.691112	ENSG00000092621.12	PHGDH	8.18234	8.60302	0.478997	0.0339762
chr2_158456643_158457043	7.72129	6.96172	-0.656555	-0.570792	0.303402	ENSG00000144283.21	PKP4	3.98047	4.13331	0.202693	0.254775
chr12_104064306_104064706	6.57511	6.18768	-0.387435	-0.176705	0.812742	ENSG00000111727.11	HCFC2	0.762082	1.72264	0.672899	0.0646013
chr6_70566699_70567099	6.89743	6.40707	-0.490359	-0.297019	0.648051	ENSG00000154079.5	SDHAF4	3.25955	2.90155	-0.421732	0.328428
chr3_150408370_150408770	7.07695	6.89371	-0.183247	0.0225002	0.982382	ENSG00000196428.12	TSC22D2	3.45003	3.22826	-0.34982	0.12826
chr1_27012773_27013173	5.96707	6.26599	0.298922	0.460053	0.388453	ENSG00000158246.7	TENT5B	2.85715	3.22826	0.387436	0.144412
chr12_28191696_28192096	5.45627	4.82572	-0.863794	-0.480139	0.417189	ENSG00000123106.10	CCDC91	2.98689	3.27109	0.091007	0.729618
chr11_113875447_113875847	6.45773	6.09841	-0.359325	-0.185896	0.79714	ENSG00000048028.11	USP28	3.94094	2.92483	-0.955338	0.00414898
chr8_124973151_124973551	4.6332	4.30938	-0.323828	-0.144422	0.880859	ENSG00000180938.5	ZNF572	-2.20867	-2.01871	0.295982	0.714935
chr10_92848530_92848930	5.27078	5.38965	0.118867	0.292138	0.667028	ENSG00000138190.16	EXOC6	2.70771	2.66401	0.249142	0.337425
chr14_67532979_67533379	5.61484	5.16531	0.470421	-0.217037	0.776802	ENSG00000054690.13	PLEKHH1	1.99484	1.63039	-1.08624	0.00557556
chr2_178413608_178414008	6.67188	6.19672	-0.475167	-0.268287	0.687437	ENSG00000223960.6	AC009948.1	2.16957	2.18197	-0.162035	0.7026
chr6_52420076_52420476	7.83733	7.53329	-0.304776	-0.0974606	0.915825	ENSG00000096093.15	EFHC1	2.29369	2.57576	-0.203387	0.456039
chr19_49676667_49677067	6.38146	6.57805	0.196589	0.393489	0.500772	ENSG00000126457.21	PRMT1	7.74354	8.08717	0.374156	0.0301575
chr8_51898974_51899374	8.46708	8.07061	-0.396469	-0.193817	0.826254	ENSG00000168300.13	PCMTD1	2.76328	3.46148	0.496255	0.110949
chr11_58578094_58578494	8.14421	7.70372	-0.440488	-0.220183	0.788083	ENSG00000110031.12	LPXN	0.290555	-0.195879	-0.601784	0.295618
chr3_29280767_29281167	7.12239	6.80823	-0.931469	-0.111649	0.895341	ENSG00000144642.21	RBMS3	-0.18368	-0.362258	-0.1715	0.793384
chr11_112226109_112226509	6.25863	5.85527	-0.40336	-0.174216	0.816425	ENSG00000150787.7	PTS	5.59467	6.00158	0.421054	0.0502643
chr6_170306474_170306874	6.5175	6.05885	-0.458658	-0.2603	0.695305	ENSG00000112584.13	FAM120B	3.04458	3.02434	-0.0733355	0.74044
chr14_49892799_49893199	6.35675	6.12597	-0.230784	-0.0587499	0.946161	ENSG00000165527.6	ARF6	4.53505	4.45408	-0.0717922	0.702256
chr7_151227127_151227527	7.00241	7.02413	0.0217153	0.199287	0.791526	ENSG00000033050.8	ABCF2	5.94316	6.61266	0.716907	0.003405
chr8_95133546_95133946	7.69568	7.42994	-0.265735	-0.0780944	0.933978	ENSG00000175895.3	PLEKHF2	2.2768	2.50223	0.152016	0.563577
chr16_28950628_28951028	5.94455	6.58594	0.675334	0.836837	0.0607105	ENSG00000176953.12	NFATC2IP	4.16232	4.76181	0.440675	0.0333127
chr3_45995623_45996023	6.14071	5.96066	-0.180051	0.0259021	0.978132	ENSG00000163820.14	FYCO1	3.50885	2.53429	-1.0976	0.00689065
chr11_65122051_65122451	5.20951	5.53577	0.32626	0.510382	0.36033	ENSG00000149792.8	MRPL49	5.85066	5.81475	0.0154313	0.937019
chr19_40603942_40604342	6.56862	6.81308	0.331429	0.437703	0.444867	ENSG00000090006.17	LTBP4	5.51665	5.04168	-0.666762	0.0103498
chr12_127060349_127060749	7.69811	6.80222	-0.895895	-0.686243	0.187484	ENSG00000249345.6	LINC02405	-0.66277	-0.373429	0.38847	0.662882
chr19_4402248_4402648	5.62841	5.92109	0.292681	0.476794	0.374613	ENSG00000167670.15	CHAF1A	4.82842	4.90756	0.151235	0.388602
chr5_55159860_55160260	5.35957	5.17453	-0.185039	0.025176	0.980766	ENSG00000164294.13	GPX8	5.20407	4.4823	-0.766532	0.00887696
chr9_116153397_116153797	5.10286	5.12246	-0.353907	0.219516	0.780547	ENSG00000182752.9	PAPPA	3.23657	2.56233	-0.675472	0.160181
chr19_58499263_58499663	6.27373	6.46929	0.232752	0.378902	0.516859	ENSG00000083807.9	SLC27A5	4.9282	5.28452	0.322497	0.200676
chrX_134373079_134373479	7.66088	7.02932	-0.631564	-0.435695	0.482061	ENSG00000156531.16	PHF6	3.49612	2.94401	-0.435205	0.0562378
chr6_149963697_149964097	5.82722	5.35872	-0.468506	-0.268939	0.691395	ENSG00000111981.4	ULBP1	-2.01516	-1.57921	0.682223	0.380626
chr11_6319715_6320115	8.71243	7.50186	-1.21057	-1.01103	0.0495277	ENSG00000170955.9	CAVIN3	5.37775	4.84403	-0.546557	0.0224674
chr3_127598141_127598541	5.91675	5.93352	0.0167736	0.203003	0.774654	ENSG00000073111.13	MCM2	6.57441	6.5098	-0.0357055	0.830885
chr15_40063670_40064070	4.24493	2.46213	-1.7828	-1.49909	0.0401854	ENSG00000248508.6	SRP14-AS1	1.8284	1.757	-0.275307	0.58924
chr19_36054219_36054619	6.66616	7.01078	0.344616	0.568357	0.288819	ENSG00000161277.10	THAP8	1.47879	1.60319	0.073826	0.863748
chr17_6473069_6473469	3.39012	3.3939	0.00377815	0.190395	0.886924	ENSG00000091622.15	PITPNM3	0.60379	-0.213313	-1.05257	0.0108469
chr22_35646653_35647053	4.56491	3.74696	-0.459913	-0.60765	0.379316	ENSG00000221963.5	APOL6	2.57429	2.60481	0.0374307	0.886719
chr3_86991108_86991508	6.04288	5.45564	-0.276727	-0.366509	0.548397	ENSG00000206538.8	VGLL3	2.65142	2.68188	-0.625918	0.0149332
chr5_140691249_140691649	7.17188	6.78696	-0.384918	-0.182972	0.812666	ENSG00000112855.15	HARS2	4.82612	4.57336	-0.229558	0.301864
chr6_137866927_137867327	6.10039	6.42642	0.326027	0.510611	0.327416	ENSG00000118503.14	TNFAIP3	3.26045	3.21457	0.254076	0.285301
chr5_121961712_121962112	7.67001	7.01554	-0.654475	-0.469647	0.431586	ENSG00000151304.5	SRFBP1	1.80677	2.33687	0.506524	0.094084
chr14_34714486_34714886	5.16799	4.92273	-0.245261	-0.0579305	0.953545	ENSG00000165410.14	CFL2	5.7182	5.09254	-0.587858	0.0228928
chr9_27573652_27574052	7.69558	7.30206	-0.393517	-0.219815	0.776305	ENSG00000147894.15	C9orf72	1.12745	1.528	0.47246	0.139969
chr19_37217732_37218132	5.6963	5.55565	-0.140652	0.0704873	0.936451	ENSG00000188283.11	ZNF383	0.59698	1.36041	0.633828	0.113734
chr5_140633220_140633620	4.37418	2.68602	-1.68815	-1.42014	0.0350368	ENSG00000170458.13	CD14	-1.68145	-0.994252	0.515345	0.505336
chr3_46979466_46979866	6.50843	6.74658	0.121791	0.419973	0.465476	ENSG00000160796.16	NBEAL2	4.10619	4.5253	-0.0553959	0.756031
chr1_15526512_15526912	6.8	6.89509	0.0950901	0.282013	0.674865	ENSG00000116138.12	DNAJC16	2.77808	2.20962	-0.250906	0.326202
chr1_201885506_201885906	5.07279	4.549	-0.422644	-0.290201	0.713962	ENSG00000198892.6	SHISA4	2.72247	1.2674	-1.37224	0.00869303
chr7_6729595_6729995	6.49376	6.21563	-0.278136	-0.0699406	0.935481	ENSG00000187953.10	PMS2CL	2.84079	3.35948	0.539303	0.0665799
chrX_119236058_119236458	6.28465	6.28452	-0.000128682	0.231087	0.74198	ENSG00000101856.9	PGRMC1	5.8705	6.13247	0.274976	0.114476
chr1_197146512_197146912	8.2371	7.65267	-0.584431	-0.390973	0.569765	ENSG00000066279.17	ASPM	2.265	1.86516	-0.737706	0.0106037
chr15_79310986_79311386	6.48533	6.16993	-0.315408	-0.114029	0.887689	ENSG00000166557.12	TMED3	7.24658	7.3569	0.102499	0.501315
chr4_67545367_67545767	7.63839	6.97519	-0.663203	-0.463942	0.438654	ENSG00000145241.10	CENPC	1.00446	1.38591	0.389117	0.212788
chr16_73047755_73048155	5.53647	5.2114	-0.919043	-0.135664	0.86977	ENSG00000140836.16	ZFHX3	2.12339	0.580202	-1.66416	0.00435731
chr12_112125249_112125649	6.5452	6.51611	-0.441535	0.179166	0.811899	ENSG00000135148.11	TRAFD1	5.50051	5.03251	-0.482301	0.0310444
chr16_1379089_1379489	5.63752	5.56867	0.342302	0.106005	0.897648	ENSG00000059145.18	UNKL	3.66974	3.79301	0.0879103	0.718948
chr2_130342596_130342996	7.28418	7.07443	-0.209749	-0.00944258	0.992252	ENSG00000136718.9	IMP4	6.85793	7.01985	0.152067	0.343259
chr8_27837642_27838042	4.36339	4.04035	-0.323037	-0.140767	0.89006	ENSG00000168078.9	PBK	4.51638	4.69419	0.243108	0.216324
chr17_57987917_57988317	5.27977	5.39663	0.116864	0.318423	0.634632	ENSG00000136451.8	VEZF1	3.70816	3.73723	0.215725	0.266675
chr12_132761987_132762387	5.76954	5.32094	-0.448597	-0.256372	0.710316	ENSG00000176915.14	ANKLE2	5.28	5.26118	0.0492902	0.774449
chr3_51983179_51983579	6.71821	6.46743	-0.25078	-0.038516	0.96705	ENSG00000114779.19	ABHD14B	6.28818	4.87416	-1.3831	0.000812677
chr6_7313051_7313451	7.84286	7.56466	-0.322746	-0.0747868	0.93805	ENSG00000124783.13	SSR1	7.27632	7.579	0.186969	0.239589
chr17_78484602_78485002	5.07171	5.18559	0.113885	0.312617	0.656805	ENSG00000267432.5	DNAH17-AS1	2.32758	1.92319	-0.274908	0.348883
chr7_30771255_30771655	4.91879	4.73728	-0.181517	0.0259045	0.981655	ENSG00000106125.14	MINDY4	0.827676	1.11436	0.319767	0.3615
chr1_966665_967065	4.56767	4.68738	0.11971	0.358396	0.637475	ENSG00000187583.10	PLEKHN1	-0.0923762	-1.38306	-1.64752	0.0228288
chr1_21345354_21345754	4.85277	5.64726	0.21213	0.961055	0.0356166	ENSG00000117298.15	ECE1	5.59347	4.77493	-0.728265	0.0051285
chr9_112717976_112718376	6.61902	6.5958	-0.0232204	0.159654	0.835855	ENSG00000148153.13	INIP	3.47498	3.94298	0.692248	0.0180536
chr11_208568_208968	4.89738	4.79594	-0.101437	0.107108	0.910763	ENSG00000177963.14	RIC8A	5.94682	5.95392	-0.0681768	0.678361
chr6_24666830_24667230	7.9866	7.20713	-1.04818	-0.579461	0.309744	ENSG00000111802.13	TDP2	4.22887	5.03636	0.830503	0.00349856
chr16_27268588_27268988	4.6404	5.04991	0.409513	0.641091	0.279474	ENSG00000169189.16	NSMCE1	4.95774	5.16496	0.143566	0.522902
chrX_111680977_111681377	7.33806	6.73926	-0.598809	-0.397363	0.520601	ENSG00000101901.11	ALG13	4.68397	5.27702	0.135446	0.532287
chr10_87342429_87342829	6.39388	6.27032	-0.123552	0.0965619	0.908366	ENSG00000223482.7	NUTM2A-AS1	4.38224	5.31922	0.789383	0.00936922
chr22_40819267_40819667	5.02624	5.50593	0.479683	0.680919	0.189597	ENSG00000100372.14	SLC25A17	5.31842	5.57054	0.163743	0.352036
chr1_233327239_233327639	7.92712	7.53013	-0.396989	-0.235288	0.76601	ENSG00000143674.10	MAP3K21	2.62667	2.15759	-0.577717	0.0253009
chr7_101121889_101122289	5.12566	4.647	-0.560067	-0.232238	0.782063	ENSG00000106366.8	SERPINE1	3.93576	2.43822	-1.52322	0.000812677
chr3_49018017_49018417	5.61411	5.62096	0.00685077	0.222431	0.758252	ENSG00000178149.16	DALRD3	4.83444	4.56494	-0.20525	0.337195
chr1_176207387_176207787	8.40594	8.13322	-0.27272	-0.07355	0.942995	ENSG00000143207.20	COP1	4.50406	4.22017	-0.346769	0.101124
chr5_151447307_151447707	5.56852	5.37604	-0.192484	0.00590783	0.995143	ENSG00000123643.12	SLC36A1	0.204193	0.52356	0.302049	0.481131
chr2_9474446_9474846	5.86456	5.81371	-0.0508499	0.141773	0.855472	ENSG00000134330.18	IAH1	5.46831	5.38456	0.0161693	0.94487
chr20_18507629_18508029	7.00116	6.72408	-0.277083	-0.0828761	0.924602	ENSG00000101310.16	SEC23B	5.67474	5.93614	0.332638	0.0601467
chr11_60906461_60906861	7.34439	7.23703	-0.282684	0.10289	0.907919	ENSG00000110107.8	PRPF19	7.42861	7.71157	0.298243	0.0672953
chr9_128341370_128341770	3.90939	4.69901	0.789614	0.937742	0.0963933	ENSG00000223551.1	TMSB4XP4	0.48528	0.857551	0.438701	0.543019
chr16_71462000_71462400	5.77585	5.3662	-0.220754	-0.202174	0.784819	ENSG00000167377.18	ZNF23	1.80422	2.4371	0.664958	0.0367798
chr6_26421199_26421599	5.88526	6.13544	0.250172	0.459265	0.401586	ENSG00000124549.14	BTN2A3P	1.24721	0.76566	-0.452014	0.24847
chr15_80989700_80990100	7.86394	7.63272	-0.23122	-0.0387335	0.969455	ENSG00000117899.10	MESD	4.56764	5.07978	0.572643	0.00941758
chr19_55624409_55624809	4.6175	5.2502	0.632698	0.816838	0.118103	ENSG00000179922.5	ZNF784	1.12654	1.03629	-0.0851888	0.846377
chr1_54715609_54716009	5.82339	5.83026	0.00686632	0.23163	0.741326	ENSG00000243725.6	TTC4	4.84719	5.69488	0.887017	0.0026675
chr16_86575758_86576158	4.73607	4.90098	0.164912	0.354121	0.621922	ENSG00000176678.5	FOXL1	1.57062	-0.738771	-1.96678	0.00273043
chr17_63827263_63827663	6.10204	6.51185	0.409806	0.615874	0.214184	ENSG00000087191.12	PSMC5	7.37717	7.84033	0.467158	0.0151048
chr3_105869011_105869411	8.36401	7.75177	-0.612239	-0.410434	0.549905	ENSG00000114423.20	CBLB	2.28635	2.11145	0.0743489	0.791853
chr11_6481210_6481610	8.25699	7.74908	-0.507912	-0.302307	0.689466	ENSG00000132254.12	ARFIP2	6.40435	6.63571	0.296495	0.0801351
chr2_240568166_240568566	3.99993	4.3219	0.321969	0.411514	0.598439	ENSG00000142327.12	RNPEPL1	4.21506	3.8708	-0.342199	0.098986
chr7_139133546_139133946	6.03857	5.75456	-0.28401	-0.0771267	0.92754	ENSG00000105948.13	TTC26	3.17973	3.406	0.102892	0.662058
chr1_150507810_150508210	3.91257	3.85503	-0.057546	0.0871948	0.941974	ENSG00000143369.14	ECM1	1.12926	0.494206	-0.678602	0.110841
chr16_3283157_3283557	6.22656	6.63056	0.404001	0.61368	0.219833	ENSG00000006194.9	ZNF263	4.74521	5.22519	0.584257	0.0113968
chr1_26890030_26890430	4.10031	4.83094	0.730631	0.940979	0.0890537	ENSG00000142751.14	GPN2	4.16607	4.44674	0.156513	0.439803
chr19_49487248_49487648	5.3612	5.91132	0.550124	0.751083	0.112547	ENSG00000142541.16	RPL13A	11.373	10.5117	-0.852655	0.00293825
chr16_81779037_81779437	6.23032	5.56872	-0.659534	-0.448422	0.420198	ENSG00000197943.9	PLCG2	1.85233	1.30451	-0.303247	0.254447
chr12_49264849_49265249	6.61649	6.99624	0.379754	0.603091	0.248643	ENSG00000167553.15	TUBA1C	10.3683	10.2343	-0.101902	0.559877
chr7_139109312_139109712	7.11826	6.80845	-0.309802	-0.0977054	0.910734	ENSG00000105939.12	ZC3HAV1	5.52885	5.00371	-0.57032	0.00797023
chr12_100266989_100267389	8.59703	7.96173	-0.868901	-0.432479	0.536242	ENSG00000136021.18	SCYL2	3.26978	3.50643	0.252112	0.193898
chr13_51452946_51453346	7.00827	7.1469	0.138625	0.338441	0.603804	ENSG00000102786.14	INTS6	3.50088	3.13336	-0.35758	0.0879621
chr4_174283035_174283435	7.28325	6.67879	-0.604457	-0.412691	0.492087	ENSG00000164117.13	FBXO8	2.57998	2.9086	0.163709	0.552906
chr8_19013523_19013923	4.90078	5.32701	-0.11669	0.610831	0.268407	ENSG00000156011.16	PSD3	0.911263	0.953734	-0.450111	0.16718
chr17_62478394_62478794	5.17964	5.1826	0.121433	0.199239	0.801517	ENSG00000146872.17	TLK2	3.71971	4.55536	0.833477	0.00398139
chr5_41925084_41925484	8.45431	7.7025	-0.751808	-0.55313	0.371334	ENSG00000151876.12	FBXO4	4.00263	3.48736	-0.463305	0.0879621
chr19_52923258_52923658	5.31668	5.5374	0.22072	0.418125	0.486776	ENSG00000213793.5	ZNF888	-0.432036	-0.623369	-0.0599974	0.912255
chr16_67942147_67942547	3.23535	3.81754	0.58219	0.791277	0.337361	ENSG00000213398.7	LCAT	2.97407	2.59571	-0.0663828	0.870315
chr10_931618_932018	6.67966	6.94995	-0.0264296	0.454389	0.42493	ENSG00000107929.14	LARP4B	4.79191	4.80042	-0.084697	0.616722
chr10_88990543_88990943	6.5055	5.69818	-0.338977	-0.608087	0.216219	ENSG00000026103.21	FAS	3.23823	2.72495	-0.372998	0.165522
chr15_78565339_78565739	6.11028	5.96414	-0.146148	0.0509929	0.954822	ENSG00000169684.13	CHRNA5	3.91179	3.6233	-0.455718	0.0855183
chr10_119165436_119165836	5.92799	5.98429	0.0563024	0.258855	0.699116	ENSG00000183605.16	SFXN4	5.67814	6.54593	0.787199	0.00380255
chr9_135480563_135480963	2.97347	3.26874	0.295268	0.493544	0.698747	ENSG00000225361.3	PPP1R26-AS1	-0.610812	0.529124	1.41091	0.0305878
chr5_32312882_32313282	9.10756	8.83208	-0.275482	-0.0733636	0.948801	ENSG00000150712.10	MTMR12	4.2359	5.1933	0.892276	0.00265918
chr18_63476661_63477061	5.01104	4.54507	-0.465969	-0.274794	0.727613	ENSG00000206075.13	SERPINB5	3.20861	1.99275	-1.19459	0.00323487
chr4_184734024_184734424	6.40317	6.65201	0.248836	0.450211	0.42266	ENSG00000151725.11	CENPU	3.15878	4.17109	1.13114	0.00322869
chr16_28974528_28974928	4.17483	4.77816	0.603331	0.76947	0.18528	ENSG00000169682.17	SPNS1	5.15872	5.49549	0.330309	0.0925171
chr9_128818240_128818640	5.57179	5.71959	0.147804	0.321433	0.606954	ENSG00000167136.6	ENDOG	5.00774	5.00256	0.013844	0.956108
chr4_25312534_25312934	5.96508	5.74202	-0.223062	-0.0114489	0.990514	ENSG00000168228.14	ZCCHC4	2.34186	1.90461	-0.480049	0.116588
chr3_197627720_197628120	5.49008	5.34809	-0.141994	0.0311479	0.973968	ENSG00000214135.8	AC132008.2	2.98854	3.20632	0.1846	0.520039
chr5_21459256_21459656	7.92346	7.17109	-0.75237	-0.541988	0.351897	ENSG00000183666.16	GUSBP1	3.20044	4.07528	0.971296	0.00861218
chr7_16645609_16646009	8.15987	7.89194	-0.267924	-0.0624411	0.951043	ENSG00000106524.8	ANKMY2	2.98837	3.38217	0.472035	0.0551902
chr9_121286959_121287359	7.02541	6.34577	-0.693317	-0.494414	0.364689	ENSG00000148180.19	GSN	4.21863	3.12593	-0.985921	0.00500777
chr5_150497575_150497975	6.76017	5.90439	-0.855781	-0.658541	0.173832	ENSG00000070614.14	NDST1	4.96372	4.42707	-0.536494	0.0210731
chrX_15493140_15493540	7.98066	7.42583	-0.554823	-0.361518	0.597002	ENSG00000087842.10	PIR	5.70736	5.59926	-0.101811	0.58426
chr9_33025003_33025403	7.47688	6.89375	-0.583138	-0.383567	0.544253	ENSG00000086061.15	DNAJA1	7.09161	7.87139	0.798346	0.00420387
chr1_147928154_147928554	6.38749	6.2422	-0.145286	0.0644617	0.941613	ENSG00000188092.14	GPR89B	3.70021	4.38644	0.706922	0.0125585
chr1_44986490_44986890	6.03246	6.38442	0.351967	0.547031	0.282668	ENSG00000070785.16	EIF2B3	5.40793	5.76427	0.350661	0.0646013
chr12_109477152_109477552	5.35496	5.59815	0.243195	0.436482	0.455154	ENSG00000110906.12	KCTD10	5.21261	5.04326	-0.160342	0.466846
chr11_67443322_67443722	4.97132	5.00435	0.0330242	0.222343	0.781403	ENSG00000172725.13	CORO1B	6.79153	6.47427	-0.165776	0.289721
chr22_23767827_23768227	5.14579	5.55749	0.188713	0.601597	0.254301	ENSG00000099953.9	MMP11	-1.40548	-1.44448	-0.856555	0.297363
chr20_52191583_52191983	6.11613	6.16081	0.044682	0.273278	0.682085	ENSG00000020256.19	ZFP64	3.44805	3.74074	0.276421	0.165935
chr17_42609313_42609713	5.87686	6.43833	0.561477	0.734623	0.109009	ENSG00000131462.7	TUBG1	7.38529	7.29277	-0.0790704	0.664353
chr11_112175303_112175703	3.70435	4.45711	0.752758	0.904007	0.136668	ENSG00000197580.11	BCO2	-0.971708	-1.08894	0.116938	0.892813
chr7_140924594_140924994	6.79621	6.73121	-0.377722	0.116459	0.887182	ENSG00000157764.13	BRAF	3.04719	3.90064	0.82901	0.00386219
chr5_43483721_43484121	8.57003	7.97871	-0.591323	-0.365811	0.621327	ENSG00000151881.14	TMEM267	3.5666	3.95064	0.57973	0.0339938
chr15_48877838_48878238	6.08398	5.75375	-0.413244	-0.107262	0.896475	ENSG00000185634.11	SHC4	-1.76641	-2.78673	-2.85955	0.0531006
chr11_706749_707149	5.14359	4.76012	-0.383469	-0.145754	0.872997	ENSG00000177030.16	DEAF1	4.60697	4.96145	0.350556	0.0898885
chr11_124793632_124794032	3.5383	3.31334	-0.224963	-0.0677167	0.96368	ENSG00000279342.2	AP000866.6	-2.38208	-2.34019	0.132731	0.898603
chr3_56683070_56683470	5.96049	5.97244	0.0119491	0.2169	0.757136	ENSG00000163946.13	FAM208A	3.7006	3.32866	-0.820191	0.00481441
chr19_2819611_2820011	4.62283	5.22477	0.601931	0.776878	0.143846	ENSG00000172006.11	ZNF554	0.856848	0.72244	-0.068568	0.882505
chr1_246507084_246507484	6.3041	6.0008	-0.583121	-0.12356	0.875187	ENSG00000185420.18	SMYD3	4.13643	4.61186	0.46084	0.104418
chr19_54448972_54449372	5.67268	5.72771	0.0550299	0.272789	0.685267	ENSG00000167615.16	LENG8	4.33526	4.39815	0.0412159	0.846483
chrX_54999841_55000241	7.4696	7.10657	-0.363037	-0.150143	0.857672	ENSG00000169188.4	APEX2	5.18555	4.94952	-0.257522	0.159068
chr3_40453123_40453523	8.29437	7.83416	-0.460208	-0.272986	0.727991	ENSG00000223797.5	ENTPD3-AS1	1.47295	2.14553	0.579143	0.227709
chr4_109729794_109730194	6.64643	6.62918	-0.0172434	0.182488	0.808302	ENSG00000123739.10	PLA2G12A	4.99991	5.46562	0.14866	0.578631
chr1_193121789_193122189	8.95727	8.3481	-0.556459	-0.410373	0.587786	ENSG00000134371.12	CDC73	4.44404	5.45318	0.679195	0.00654122
chr2_27032729_27033129	5.2425	5.88465	0.642146	0.837459	0.0679318	ENSG00000119777.19	TMEM214	6.08805	5.5275	-0.532828	0.0106579
chr1_85259512_85259912	8.1571	8.04665	-0.110451	0.0898838	0.926358	ENSG00000162642.13	C1orf52	5.96701	6.46437	0.508308	0.0195414
chr10_119651212_119651612	6.54725	6.60309	0.0558476	0.246012	0.721025	ENSG00000151929.9	BAG3	6.11013	6.26081	0.179773	0.352998
chr1_207052977_207053377	7.62041	7.60292	-0.0174963	0.174568	0.833521	ENSG00000123836.14	PFKFB2	2.96592	3.25718	0.0352604	0.865815
chr15_29269602_29270002	5.11271	4.9123	-0.200406	-0.00542003	0.995842	ENSG00000185115.5	NSMCE3	1.3875	2.01952	0.66179	0.0245805
chr15_72783560_72783960	7.08012	6.57088	-0.509242	-0.320658	0.619314	ENSG00000159322.17	ADPGK	5.8127	5.2535	-0.463678	0.0409713
chr7_12403741_12404141	7.7268	6.99707	-0.729723	-0.545213	0.33546	ENSG00000146530.13	VWDE	0.603572	0.521462	0.134334	0.757524
chr19_6460289_6460689	5.65389	5.89033	0.236438	0.411534	0.468874	ENSG00000125648.14	SLC25A23	5.59337	4.82186	-0.829991	0.00488742
chr8_144137507_144137907	6.96565	7.00413	0.0384782	0.220473	0.763472	ENSG00000235173.6	HGH1	5.95037	5.93756	-0.0341794	0.849294
chrX_120250504_120250904	7.746	7.35014	-0.395857	-0.189337	0.815775	ENSG00000177485.6	ZBTB33	2.92217	2.21246	-0.695661	0.0166643
chr3_190513726_190514126	8.15567	7.41892	-0.277153	-0.559901	0.344766	ENSG00000196083.9	IL1RAP	4.65871	4.50262	-0.0593011	0.937019
chr1_24415482_24415882	5.08319	5.39558	0.312391	0.512404	0.374799	ENSG00000001461.16	NIPAL3	2.97215	2.91247	-0.216372	0.312544
chr6_30344964_30345364	5.65254	5.9242	0.271662	0.470407	0.386608	ENSG00000241370.5	RPP21	5.93469	6.48059	0.582964	0.0228903
chr2_237966671_237967071	6.10794	6.14365	-0.26889	0.203311	0.772223	ENSG00000184182.18	UBE2F	5.448	5.95964	0.499724	0.0277246
chr19_40716807_40717207	5.31918	5.18093	-0.138244	0.105937	0.908048	ENSG00000086544.2	ITPKC	1.88044	2.23943	0.317482	0.240205
chrX_2828472_2828872	4.52044	3.93166	-0.588778	-0.369057	0.64875	ENSG00000056998.19	GYG2	3.30726	3.46616	0.113134	0.598066
chr17_63621940_63622340	7.65946	7.81963	0.160163	0.369195	0.590036	ENSG00000198909.7	MAP3K3	3.86336	3.44859	-0.372603	0.0644777
chr15_70853712_70854112	3.95963	3.85406	-0.105573	0.0830956	0.944764	ENSG00000166173.10	LARP6	3.52528	3.06596	-0.729111	0.0555809
chr1_156728592_156728992	7.09793	7.28862	0.190691	0.383671	0.543308	ENSG00000143303.11	RRNAD1	4.02316	3.50518	-0.643684	0.0680065
chr11_66970784_66971184	6.95345	6.42883	-0.52462	-0.295262	0.658315	ENSG00000173237.4	C11orf86	5.75874	5.39263	-0.349199	0.0760436
chr19_17859562_17859962	5.84056	6.69614	0.855574	1.06244	0.0118445	ENSG00000105640.12	RPL18A	11.6349	11.1025	-0.502751	0.0104645
chr19_39480619_39481019	5.63706	5.8912	0.254132	0.43877	0.429855	ENSG00000105197.10	TIMM50	7.11824	7.39193	0.312341	0.060681
chr6_33418083_33418483	6.56681	6.90931	0.342504	0.55367	0.297503	ENSG00000112514.15	CUTA	7.78514	8.27829	0.561609	0.0126336
chr5_138753290_138753690	5.88985	6.17346	0.283612	0.468047	0.380862	ENSG00000044115.20	CTNNA1	7.74801	7.50522	-0.267602	0.0991736
chr9_110256539_110256939	7.2801	6.96067	-0.319428	-0.0934175	0.916302	ENSG00000136810.12	TXN	9.29652	8.29747	-0.975985	0.00111861
chr3_136196299_136196699	7.83145	7.73346	-0.0979942	0.117144	0.897684	ENSG00000174579.3	MSL2	2.99351	2.72227	-0.145099	0.555113
chr5_151771405_151771805	9.18894	8.93887	-0.250073	-0.0536958	0.963993	ENSG00000275765.5	AC091982.3	0.926239	0.385351	-0.556626	0.405797
chr6_157981553_157981953	5.50722	5.12735	-0.732552	-0.189621	0.808113	ENSG00000078269.14	SYNJ2	2.01608	1.88949	-0.787065	0.0136637
chr8_41577883_41578283	6.46383	6.38436	-0.0794702	0.127759	0.872997	ENSG00000158669.11	GPAT4	5.66863	6.11452	0.409785	0.0433101
chr17_42121152_42121552	3.98729	4.91432	0.927039	1.0761	0.0397698	ENSG00000108773.10	KAT2A	5.56534	6.33039	0.757404	0.00494329
chrX_110002669_110003069	6.97946	6.2925	-0.68696	-0.466141	0.409617	ENSG00000157600.11	TMEM164	4.19815	4.04071	-0.0556646	0.776767
chr17_62672155_62672555	4.21457	4.48777	0.40678	0.486735	0.494208	ENSG00000011028.13	MRC2	4.12962	4.20495	0.0369533	0.859974
chr1_46604126_46604526	6.24652	6.32303	-0.38536	0.285975	0.658311	ENSG00000079277.20	MKNK1	4.93987	4.78423	-0.302185	0.117511
chr8_94949226_94949626	7.4286	6.66636	-0.76224	-0.548654	0.328285	ENSG00000164938.13	TP53INP1	0.49982	-0.201008	-0.74869	0.0755502
chr19_4153330_4153730	3.17337	3.2459	0.0725373	0.226366	0.874152	ENSG00000060566.13	CREB3L3	-2.54402	-1.47449	1.83533	0.0593139
chr3_67654417_67654817	7.21951	6.52895	-0.690556	-0.477678	0.403392	ENSG00000172340.14	SUCLG2	4.58795	3.99696	-0.581073	0.0138656
chr1_205449878_205450278	5.89461	5.10869	-0.554139	-0.555245	0.310019	ENSG00000186007.9	LEMD1	3.01815	1.24271	-1.89353	0.0455028
chr7_29146341_29146741	5.10128	4.94328	-0.811184	0.0568341	0.955263	ENSG00000106066.14	CPVL	5.78949	5.63018	-0.142609	0.426508
chr2_200662724_200663124	6.71487	6.10276	-0.471488	-0.408467	0.481385	ENSG00000138356.13	AOX1	0.80251	-0.254099	-1.19778	0.0373074
chr8_70608242_70608642	8.25981	7.6615	-0.59831	-0.380098	0.5873	ENSG00000067167.7	TRAM1	6.3811	6.17238	-0.0934564	0.547405
chr19_52189656_52190056	7.24744	7.13379	-0.113649	0.0996339	0.910574	ENSG00000105568.17	PPP2R1A	6.69152	7.56587	0.882324	0.00256961
chr4_6709648_6710048	3.68869	3.81573	0.127039	0.308908	0.759843	ENSG00000178988.10	MRFAP1L1	4.59136	4.96017	0.370924	0.0683937
chr10_75210319_75210719	6.73571	6.76556	-0.38977	0.242585	0.731867	ENSG00000165637.13	VDAC2	8.22283	8.74385	0.560002	0.0123656
chr16_67183500_67183900	6.58594	6.83371	0.247768	0.463164	0.415511	ENSG00000196123.12	KIAA0895L	3.42008	3.43853	0.114418	0.626079
chr12_110501951_110502351	5.75998	6.22711	0.467137	0.668365	0.162486	ENSG00000111237.18	VPS29	6.47166	6.91276	0.447784	0.0312574
chr1_225465325_225465725	6.89011	5.78846	-1.10164	-0.883304	0.0484041	ENSG00000234476.1	AC092811.1	2.23361	1.69385	-0.526484	0.322654
chr16_69726333_69726733	7.04773	7.0816	0.0338754	0.236935	0.745497	ENSG00000181019.12	NQO1	7.7002	7.45042	-0.226095	0.148457
chr16_31094647_31095047	6.55147	6.71548	0.164013	0.374952	0.538717	ENSG00000167397.14	VKORC1	7.32356	7.47176	0.162463	0.314341
chr9_92293609_92294009	6.00697	6.18931	0.182342	0.385842	0.506566	ENSG00000196305.17	IARS	6.64638	6.31027	-0.21087	0.172247
chr9_34620355_34620755	5.57764	5.86454	0.286893	0.484138	0.370733	ENSG00000137100.15	DCTN3	6.13637	6.14126	0.0179357	0.944079
chr14_90256366_90256766	5.05396	4.67682	-0.377139	-0.174534	0.842246	ENSG00000100764.13	PSMC1	7.17629	7.65005	0.560276	0.00849508
chr6_149864141_149864541	6.694	6.8286	0.0563254	0.325813	0.610624	ENSG00000120256.10	LRP11	3.22731	2.21129	-0.998309	0.00621364
chr15_67414086_67414486	3.46308	4.08454	0.621459	0.831763	0.240676	ENSG00000259673.5	IQCH-AS1	-0.630422	-0.986848	-0.78134	0.160997
chr19_7636881_7637281	4.56083	4.9964	0.599411	0.641165	0.27747	ENSG00000076944.15	STXBP2	5.83263	5.52025	-0.365702	0.0703688
chr14_90646018_90646418	5.24681	4.59925	-0.716436	-0.397901	0.574597	ENSG00000165914.14	TTC7B	3.41608	3.80263	0.453469	0.0921796
chr16_70439058_70439458	5.97101	5.87938	-0.142024	0.0514292	0.953612	ENSG00000157350.12	ST3GAL2	4.46412	3.80638	-0.741338	0.0070393
chr2_24793011_24793411	7.28955	7.31325	0.0237012	0.23372	0.755986	ENSG00000138092.10	CENPO	4.5254	4.99969	0.251309	0.177751
chr8_43093615_43094015	6.06293	5.47472	-0.588211	-0.35528	0.568341	ENSG00000185900.9	POMK	2.25775	1.10235	-1.01194	0.141217
chr17_732320_732720	4.55569	4.45864	-0.0970471	0.0907119	0.928969	ENSG00000167695.14	FAM57A	4.89231	5.12644	0.285646	0.120842
chr2_28392609_28393009	8.19695	8.14702	-0.223746	0.144461	0.875187	ENSG00000075426.11	FOSL2	4.91396	5.00257	0.0399602	0.810487
chr1_114669965_114670365	7.64733	7.28394	-0.36339	-0.164977	0.84247	ENSG00000175984.14	DENND2C	-1.2495	-0.588941	0.307576	0.54355
chr1_52056016_52056416	6.25067	6.72601	0.0557252	0.664951	0.17089	ENSG00000117862.12	TXNDC12	4.89223	4.98721	0.106028	0.559264
chr19_17075393_17075793	6.20717	6.56937	0.501428	0.536907	0.29607	ENSG00000099331.13	MYO9B	4.39363	4.12749	-0.57996	0.0113383
chr5_57173706_57174106	7.33619	7.71032	0.1494	0.593603	0.292786	ENSG00000062194.15	GPBP1	3.93158	4.52919	0.531054	0.0189275
chr9_2015028_2015428	8.79226	8.10233	-0.391676	-0.500597	0.463982	ENSG00000080503.23	SMARCA2	4.70777	4.02355	-0.851759	0.0041734
chr9_132944411_132944811	5.35732	5.0876	0.243676	-0.108981	0.899591	ENSG00000165699.14	TSC1	3.74136	4.07546	0.341125	0.162892
chr17_59106764_59107164	7.42969	7.3925	-0.0371925	0.163138	0.843975	ENSG00000108395.13	TRIM37	3.57465	3.64803	0.0931412	0.734229
chr1_179081848_179082248	7.64573	7.20965	-0.436081	-0.225649	0.770338	ENSG00000186283.13	TOR3A	5.59539	5.13354	-0.383332	0.0428756
chr13_80341186_80341586	8.30722	7.65215	-0.678097	-0.467691	0.47232	ENSG00000136158.11	SPRY2	3.38916	3.29496	-0.0805484	0.749097
chrX_153900789_153901189	5.65779	5.25242	-0.684476	-0.194028	0.799517	ENSG00000126895.14	AVPR2	0.65842	-0.611485	-1.29637	0.0564359
chr2_151828317_151828717	6.95601	6.76904	-0.186967	0.0135248	0.988944	ENSG00000162980.16	ARL5A	3.7075	4.41432	0.423625	0.0705611
chr18_2655481_2655881	6.85076	6.84021	-0.010556	0.187108	0.805947	ENSG00000101596.15	SMCHD1	3.24373	3.32704	-0.255209	0.285646
chr17_68457575_68457975	7.49384	7.36717	-0.152771	0.0681312	0.942949	ENSG00000070540.12	WIPI1	3.89903	3.41751	-0.443197	0.118638
chr19_4639220_4639620	4.97488	5.20928	0.234406	0.434886	0.494222	ENSG00000185361.8	TNFAIP8L1	2.02356	2.10446	0.083771	0.810542
chr14_89954638_89955038	6.938	6.7213	-0.164393	-0.0182965	0.984999	ENSG00000042088.13	TDP1	4.43092	4.41131	0.0825483	0.677022
chr16_31052128_31052528	5.67237	5.26273	-0.409647	-0.188979	0.807421	ENSG00000232748.3	AC135050.1	-0.971708	-0.484867	0.602033	0.253844
chr22_46533395_46533795	4.56466	4.66488	0.032038	0.297888	0.708004	ENSG00000075275.16	CELSR1	3.75081	2.87079	-1.11763	0.00158646
chr12_22544419_22544819	7.84138	7.24406	-0.786892	-0.397639	0.54233	ENSG00000111731.12	C2CD5	2.78855	2.02873	-0.976665	0.00727253
chr10_91798220_91798620	6.5823	6.58488	0.00258619	0.203074	0.780478	ENSG00000107854.5	TNKS2	3.34497	3.47693	0.147266	0.559786
chr1_184974193_184974593	5.92952	5.43492	-0.131607	-0.308114	0.629161	ENSG00000135842.16	FAM129A	2.62029	1.84821	-0.769619	0.0224064
chr11_68121286_68121686	5.80991	5.81477	0.00486467	0.203821	0.776302	ENSG00000110721.11	CHKA	4.3278	4.9379	0.71489	0.0143297
chr9_109320936_109321336	6.2285	6.06964	-0.15886	0.0199167	0.983515	ENSG00000095203.14	EPB41L4B	2.72654	3.04522	0.344548	0.110513
chr19_6424850_6425250	6.62713	7.04038	0.413258	0.583566	0.260101	ENSG00000088247.17	KHSRP	8.10666	7.87893	-0.173841	0.242817
chr5_69414909_69415309	5.1959	5.37543	0.179529	0.378206	0.554918	ENSG00000152939.15	MARVELD2	1.33179	1.5182	0.341717	0.227265
chr1_20507932_20508332	5.10552	5.06818	-0.0373403	0.143004	0.868292	ENSG00000090432.6	MUL1	3.84565	4.3612	0.529655	0.0228197
chr4_3532317_3532717	4.5891	4.72501	0.135909	0.318281	0.677965	ENSG00000163956.11	LRPAP1	6.49216	6.84892	0.395764	0.0338149
chr22_29838152_29838552	5.90756	6.23014	-0.0554467	0.492088	0.345745	ENSG00000100325.14	ASCC2	5.43268	5.58282	0.13355	0.433592
chr17_47850937_47851337	4.51543	4.79082	0.27539	0.480218	0.477795	ENSG00000189120.4	SP6	-1.12887	-1.56015	-0.573703	0.368213
chr3_53347439_53347839	6.81011	6.89074	0.0806301	0.29625	0.658141	ENSG00000272886.5	DCP1A	3.20786	3.15488	0.0130273	0.952276
chr11_19116892_19117292	6.65817	6.03674	-0.621432	-0.402929	0.488963	ENSG00000177054.13	ZDHHC13	2.36363	2.43683	0.044823	0.880134
chr20_45857279_45857679	5.89075	6.07626	0.185508	0.392029	0.499015	ENSG00000101473.16	ACOT8	4.80754	4.92613	0.131108	0.54355
chr11_76721751_76722151	4.13278	4.42386	0.291073	0.467666	0.520705	ENSG00000204529.4	GUCY2EP	1.89849	1.32043	-0.614991	0.236863
chr6_37432996_37433396	5.56306	5.52444	-0.038619	0.158712	0.839996	ENSG00000137200.12	CMTR1	4.32939	4.55856	0.182125	0.328333
chr5_161846741_161847141	4.0008	4.28499	0.284187	0.425319	0.585021	ENSG00000022355.16	GABRA1	-2.8365	-1.51693	2.79644	0.0227923
chr7_130668546_130668946	6.2032	6.26647	0.06327	0.253461	0.703825	ENSG00000158623.14	COPG2	4.17838	4.26882	0.106687	0.562698
chr19_38374401_38374801	6.36016	6.77246	0.412299	0.605962	0.22804	ENSG00000099341.11	PSMD8	7.38702	7.81932	0.55164	0.00861218
chr13_32315369_32315769	6.41939	6.15136	-0.268026	-0.0468791	0.958913	ENSG00000139618.14	BRCA2	-0.332487	0.800016	0.0800134	0.81379
chr1_204516170_204516570	6.20071	6.45692	0.256213	0.4636	0.39781	ENSG00000198625.12	MDM4	2.74799	2.47159	0.0743147	0.736416
chr9_4792617_4793017	8.55243	8.19684	-0.458169	-0.157934	0.865608	ENSG00000120158.11	RCL1	4.72648	5.6872	0.804894	0.00387562
chr14_34462204_34462604	6.71921	6.66674	-0.0524772	0.137287	0.8641	ENSG00000165389.6	SPTSSA	4.03009	3.61027	-0.421213	0.228232
chr1_35808045_35808445	4.56506	3.995	-0.570054	-0.427727	0.568819	ENSG00000134698.10	AGO4	1.05675	1.10621	-0.173548	0.503112
chr6_33580061_33580461	4.80688	5.22922	0.422342	0.656821	0.248142	ENSG00000030110.12	BAK1	5.48229	4.91405	-0.559968	0.0128503
chr11_18105897_18106297	4.68313	4.82555	0.142421	0.320562	0.66839	ENSG00000166788.9	SAAL1	3.81225	4.59042	0.80532	0.00802069
chr4_139555623_139556023	5.42051	5.3867	-0.260332	0.189809	0.809124	ENSG00000145391.13	SETD7	4.34973	3.73337	-0.990835	0.00368446
chr19_19170140_19170540	3.70636	4.55015	0.280967	1.0349	0.0724923	ENSG00000213999.15	MEF2B	-1.12921	-1.12337	-0.0294473	0.973536
chr6_30907799_30908199	6.4744	6.39396	-0.0804425	0.125603	0.875187	ENSG00000213780.10	GTF2H4	5.73108	5.03122	-0.411675	0.0425665
chr16_381687_382087	3.69939	4.04446	0.345065	0.447983	0.595384	ENSG00000129925.10	TMEM8A	3.84195	5.20214	1.64908	0.00057166
chr9_75028264_75028664	8.37202	8.02868	-0.343343	-0.146641	0.874277	ENSG00000156017.12	CARNMT1	2.75886	3.1857	0.81985	0.00703877
chr2_24164383_24164783	3.40068	3.63751	0.236834	0.434112	0.671554	ENSG00000219626.8	FAM228B	-1.04279	-1.57921	-1.05157	0.252138
chr20_407666_408066	5.16055	5.08904	-0.0715171	0.0941858	0.917135	ENSG00000125826.20	RBCK1	5.64934	6.03096	0.123817	0.476438
chr12_64222041_64222441	7.14574	7.1348	-0.010943	0.199414	0.796362	ENSG00000174206.12	C12orf66	2.79823	2.38973	-0.485291	0.081569
chr10_80413501_80413901	6.24656	4.66566	-1.0764	-1.34566	0.00171686	ENSG00000122378.13	PRXL2A	5.60077	5.13957	-0.514298	0.0226864
chr12_52051073_52051473	7.52311	7.38536	0.146768	0.0653984	0.944996	ENSG00000123358.19	NR4A1	4.76102	5.22693	0.407254	0.0403969
chr14_24299609_24300009	5.32486	5.00473	-0.0430065	-0.135402	0.874841	ENSG00000157379.13	DHRS1	3.13734	3.60878	0.536061	0.137685
chr4_1712546_1712946	6.21031	6.21076	0.000443712	0.214652	0.761585	ENSG00000163950.12	SLBP	5.43189	6.06316	0.610217	0.0116592
chr12_100573435_100573835	7.86705	7.35033	-0.516716	-0.326335	0.640015	ENSG00000139354.10	GAS2L3	2.27505	1.43764	-0.632088	0.0508595
chrX_18674848_18675248	6.71636	6.48738	-0.294083	-0.0183801	0.984814	ENSG00000086717.18	PPEF1	-0.407511	-0.968939	0.0643941	0.946458
chr17_16491962_16492362	3.85904	3.52486	-0.289583	-0.250702	0.815956	ENSG00000181350.11	LRRC75A	-0.964256	-0.972541	0.0289146	0.969716
chr2_216412169_216412569	7.65271	7.20209	-0.668577	-0.262434	0.720063	ENSG00000138375.12	SMARCAL1	3.64686	3.74293	0.135484	0.487793
chr14_99574449_99574849	6.25379	4.98821	-1.09287	-1.04812	0.0156338	ENSG00000205476.8	CCDC85C	4.92948	4.87787	0.0839061	0.64408
chr1_28914177_28914577	5.6435	5.62529	0.0138643	0.167386	0.825505	ENSG00000159023.21	EPB41	4.21301	3.93975	-0.200681	0.256594
chr15_74889859_74890259	4.79024	4.80054	0.0103079	0.214551	0.799082	ENSG00000178802.17	MPI	5.97019	4.31178	-1.57659	0.000812677
chr7_7640460_7640860	8.64874	8.17937	-0.674599	-0.282491	0.729016	ENSG00000106399.11	RPA3	6.13566	5.93665	-0.235179	0.216535
chr9_105557914_105558314	6.43878	6.3218	-0.116985	0.0687129	0.936322	ENSG00000106692.14	FKTN	2.29908	2.54574	-0.110025	0.624393
chr2_74421496_74421896	5.77431	5.32417	-0.450143	-0.226007	0.757391	ENSG00000005448.16	WDR54	4.31174	3.9243	-0.358371	0.248354
chr2_200509868_200510268	6.02019	5.44528	-0.574903	-0.383303	0.514352	ENSG00000155729.12	KCTD18	0.791326	0.758638	0.027695	0.951287
chr6_28399598_28399998	5.28446	4.64457	-0.639894	-0.439056	0.501403	ENSG00000158691.14	ZSCAN12	1.155	0.397052	-0.770836	0.0321389
chr22_26512306_26512706	5.69044	5.14689	-0.543555	-0.351764	0.580601	ENSG00000100109.16	TFIP11	4.59689	4.86857	0.298664	0.113435
chr19_45499319_45499719	3.08614	3.85838	0.772235	0.88317	0.267214	ENSG00000213889.10	PPM1N	1.106	0.299278	-0.499245	0.481091
chr15_52295637_52296037	5.55468	4.95304	-0.658601	-0.393195	0.539996	ENSG00000128833.12	MYO5C	2.20879	1.45899	-1.08532	0.00318704
chr1_206202966_206203366	7.16957	7.36656	0.196998	0.371291	0.562319	ENSG00000266028.7	SRGAP2	4.976	3.88189	-1.13882	0.0011412
chr22_37519237_37519637	3.53233	4.08081	-0.332076	0.744131	0.305717	ENSG00000100065.14	CARD10	5.01722	4.46565	-0.668352	0.00668228
chr5_10563751_10564151	7.9928	7.34052	-0.652275	-0.478566	0.436155	ENSG00000164236.11	ANKRD33B	1.72947	2.96667	1.27084	0.000945761
chr3_27194130_27194530	7.49253	6.60039	-0.773173	-0.665723	0.199088	ENSG00000163491.16	NEK10	1.29162	0.576708	-0.64576	0.146535
chr3_159837746_159838146	4.87523	3.46442	-1.0792	-1.22741	0.0248068	ENSG00000151967.18	SCHIP1	-1.84019	-1.06172	-0.519593	0.53285
chr20_462367_462767	5.26963	5.10087	-1.51043	0.0173262	0.986641	ENSG00000125875.13	TBC1D20	3.67778	3.91115	0.0986703	0.6012
chr4_7939631_7940031	5.65211	5.74133	-0.0119746	0.293548	0.651762	ENSG00000196526.10	AFAP1	5.05193	4.69242	-0.406269	0.0782746
chr3_195271116_195271516	6.482	6.89126	0.0628326	0.63151	0.214998	ENSG00000173950.15	XXYLT1	4.26129	3.70445	-0.5546	0.0172585
chr1_43358640_43359040	6.66984	6.70579	0.0359531	0.227303	0.748106	ENSG00000117399.13	CDC20	7.52555	6.65602	-0.861361	0.00174045
chr19_16572754_16573154	2.45462	2.80845	0.35383	0.460522	0.790031	ENSG00000279529.1	AC008764.8	-1.91414	-2.4607	-0.791788	0.646596
chr6_150599802_150600202	4.08454	4.04665	-0.0378948	0.16525	0.873306	ENSG00000120278.16	PLEKHG1	0.975048	0.324831	-0.564463	0.087272
chrX_2929027_2929427	5.66731	4.92927	-0.738039	-0.561398	0.302782	ENSG00000006756.15	ARSD	0.91529	1.11436	-0.00491575	0.991678
chr21_42395924_42396324	4.93057	4.44063	-0.489942	-0.269878	0.740728	ENSG00000160183.14	TMPRSS3	3.72694	3.09312	-0.731156	0.0247396
chr19_46746200_46746600	3.24983	3.45826	0.208426	0.366581	0.75596	ENSG00000090372.14	STRN4	5.29558	5.34752	0.121319	0.462735
chr20_20712602_20713002	7.1011	6.88752	-0.213578	-0.0156351	0.987825	ENSG00000188559.14	RALGAPA2	1.45771	0.831968	-0.340319	0.200109
chr19_1863663_1864063	6.14384	6.70835	0.474555	0.715441	0.126198	ENSG00000129911.8	KLF16	4.3913	4.23787	0.0205108	0.921409
chr15_77070947_77071347	6.11645	6.04119	-0.0752586	0.0924985	0.910494	ENSG00000140391.14	TSPAN3	6.82535	6.86947	0.193767	0.21869
chr20_35742213_35742613	6.60315	7.07451	0.47136	0.657328	0.189332	ENSG00000131051.22	RBM39	6.51784	7.16857	0.564379	0.0116774
chr3_9933514_9933914	7.84387	7.6455	-0.198367	0.010578	0.991681	ENSG00000163703.17	CRELD1	4.40874	4.38943	-0.117445	0.5579
chr8_143617451_143617851	6.96987	7.09208	0.12221	0.319843	0.627666	ENSG00000104522.15	TSTA3	7.30048	7.00837	-0.318121	0.0594136
chr8_97869280_97869680	5.95864	5.61115	-0.615186	-0.143685	0.854743	ENSG00000132561.13	MATN2	1.10754	-0.779896	-2.29291	0.00179604
chr17_5584352_5584752	3.31488	3.25053	-0.0643523	0.0619931	0.969002	ENSG00000091592.15	NLRP1	-1.68592	-1.01457	-0.33522	0.679723
chr1_34780978_34781378	4.17674	2.90161	-1.27514	-1.0556	0.151679	ENSG00000188910.7	GJB3	-0.359403	-0.184145	0.0849119	0.888898
chr12_122830859_122831259	4.82315	4.32961	0.0951397	-0.282101	0.730422	ENSG00000130787.13	HIP1R	5.04404	4.62175	-0.36666	0.0517187
chr11_114439223_114439623	6.45489	5.80299	-0.651908	-0.476736	0.369376	ENSG00000076043.9	REXO2	6.4498	7.08915	0.609639	0.00830238
chr12_122500803_122501203	6.40491	6.70487	0.299954	0.497125	0.357306	ENSG00000033030.13	ZCCHC8	3.55106	3.85775	0.222385	0.261149
chr14_102362770_102363170	5.73321	5.97021	0.237009	0.4425	0.427407	ENSG00000100865.14	CINP	5.49873	5.90475	0.409398	0.0572911
chr2_182426756_182427156	4.89724	4.5626	-0.334643	-0.107584	0.912847	ENSG00000115252.18	PDE1A	3.93138	2.88949	-1.0072	0.00354087
chr5_159099095_159099495	5.80089	5.51884	-0.723602	-0.0896596	0.915363	ENSG00000164330.16	EBF1	0.323358	-0.309635	-0.945701	0.0527035
chr1_91885867_91886267	7.51924	6.94962	-0.860709	-0.359404	0.585086	ENSG00000069702.10	TGFBR3	3.03453	2.731	-0.175	0.392145
chr6_5261163_5261563	8.30341	8.2741	-0.0293097	0.172665	0.84874	ENSG00000145982.12	FARS2	4.97209	4.93963	0.0047223	0.982598
chr3_33114297_33114697	7.70318	7.49831	-0.204875	0.0171904	0.987066	ENSG00000170275.14	CRTAP	8.5677	8.25131	-0.343385	0.0400124
chr10_87095127_87095527	6.95726	6.66206	-0.295201	-0.0941618	0.912997	ENSG00000122376.11	SHLD2	3.43966	3.45855	0.0501372	0.815061
chr2_23384834_23385234	6.86245	6.22008	-0.642364	-0.465944	0.395966	ENSG00000119771.14	KLHL29	2.74476	2.27209	-0.519944	0.0349208
chr1_51729485_51729885	6.91171	6.64657	-0.164467	-0.045563	0.961175	ENSG00000117859.18	OSBPL9	5.19329	5.34834	0.177356	0.289288
chr15_72375889_72376289	6.20851	5.91959	-0.288926	-0.0853117	0.91898	ENSG00000213614.9	HEXA	6.53817	6.55611	-0.0166027	0.928642
chr6_87472811_87473211	6.12588	5.66798	-0.457904	-0.235764	0.735523	ENSG00000164414.17	SLC35A1	1.77791	2.17277	0.399009	0.247541
chr12_120302060_120302460	4.86435	4.82942	-0.0349263	0.113993	0.901581	ENSG00000089163.4	SIRT4	1.34465	1.04258	-0.42751	0.387856
chr8_8386298_8386698	5.96755	4.79098	-1.17657	-0.986445	0.027987	ENSG00000275342.4	PRAG1	1.66206	1.60853	-0.0739953	0.779574
chr2_177263595_177263995	7.02336	6.50928	-0.514085	-0.306908	0.638672	ENSG00000116044.15	NFE2L2	3.81404	3.55786	-0.276738	0.179832
chr1_149939088_149939488	6.05864	6.1749	0.116256	0.313367	0.615462	ENSG00000014914.20	MTMR11	1.65113	1.07372	-0.642947	0.0821295
chr21_14383065_14383465	7.99214	7.53685	-0.455288	-0.257144	0.736455	ENSG00000155304.5	HSPA13	3.40093	3.82513	0.441503	0.0645495
chr12_57127641_57128041	5.55501	5.79457	-0.20345	0.460476	0.414977	ENSG00000123384.13	LRP1	3.89652	2.77872	-1.335	0.00261933
chr12_95003511_95003911	5.94373	5.82729	-0.899627	0.0787299	0.92556	ENSG00000184752.12	NDUFA12	6.87153	7.4147	0.56055	0.0157153
chr20_50510009_50510409	6.96327	6.94191	-0.0213624	0.208153	0.783695	ENSG00000196396.9	PTPN1	5.18603	5.01361	-0.185193	0.252422
chr22_38057012_38057412	4.86025	4.9052	0.375706	0.240101	0.765039	ENSG00000100151.15	PICK1	4.36808	4.43711	0.150702	0.448623
chr22_42519663_42520063	4.89333	5.33049	0.437166	0.599398	0.275738	ENSG00000189306.10	RRP7A	6.00253	5.97197	0.0921237	0.585159
chr15_74365291_74365691	3.99335	4.32766	0.334305	0.572238	0.419549	ENSG00000261821.2	AC090826.1	-0.850905	-1.0026	-0.174879	0.736546
chr17_15262425_15262825	6.55208	6.29321	-0.182204	-0.0321241	0.972816	ENSG00000109099.14	PMP22	6.18412	6.49793	0.328873	0.056213
chr1_38005254_38005654	4.0793	4.43093	0.20515	0.501695	0.480318	ENSG00000183386.9	FHL3	3.84227	3.78748	-0.0436169	0.866189
chr8_109644559_109644959	8.04438	7.29416	-0.650644	-0.546623	0.352759	ENSG00000147642.16	SYBU	2.89392	2.23722	-0.574385	0.0561136
chr1_162632208_162632608	4.90686	5.14735	0.162038	0.435088	0.498841	ENSG00000162733.17	DDR2	3.72306	3.30199	-0.432718	0.0317081
chr9_112174777_112175177	4.73672	4.31879	-0.333449	-0.290279	0.717927	ENSG00000106868.16	SUSD1	2.11325	1.7365	-0.391929	0.159622
chr12_56258223_56258623	5.30479	5.59919	0.205021	0.481502	0.390503	ENSG00000139645.9	ANKRD52	5.79995	5.09058	-0.908525	0.00526166
chr16_14974829_14975229	5.49673	5.77737	0.0850663	0.504034	0.359441	ENSG00000179889.18	PDXDC1	5.73785	5.75446	0.240963	0.136125
chr6_95577432_95577832	7.41179	6.99695	-0.414845	-0.230302	0.756333	ENSG00000172469.15	MANEA	0.648449	0.820981	0.385369	0.242412
chr1_150926079_150926479	5.52209	6.01291	0.311949	0.686388	0.15065	ENSG00000143379.12	SETDB1	4.56267	5.29922	0.661829	0.00632276
chr4_124712283_124712683	7.30739	6.64651	-0.66088	-0.459072	0.429525	ENSG00000151458.11	ANKRD50	0.965558	0.885097	0.0236299	0.950902
chr17_28645040_28645440	6.01279	6.43816	0.425372	0.650003	0.187497	ENSG00000007202.14	KIAA0100	6.77822	6.46959	-0.294064	0.135207
chrX_119468153_119468553	6.91444	6.735	-0.179431	0.0369149	0.969131	ENSG00000005022.5	SLC25A5	9.41824	9.32545	-0.0763181	0.668888
chr19_872651_873414	5.65318	5.95237	0.269883	0.464871	0.386656	ENSG00000175221.14	MED16	3.89996	4.94498	0.961797	0.0024072
chr16_29900054_29900454	4.90663	4.96321	0.0565804	0.263476	0.735046	ENSG00000174939.10	ASPHD1	4.69251	4.65763	-0.0156438	0.958921
chr19_55487253_55487653	4.24458	3.95616	-0.288426	-0.131178	0.90067	ENSG00000179954.15	SSC5D	-0.0204859	-1.82918	-2.18046	0.0120658
chr11_65860266_65860666	5.96395	5.78283	-0.181117	0.0342025	0.970508	ENSG00000172732.11	MUS81	4.74973	4.78932	0.0707433	0.718232
chr1_6440251_6440651	4.57429	4.05181	-0.522479	-0.340264	0.672864	ENSG00000187017.16	ESPN	3.22342	1.32447	-1.63769	0.00348025
chr13_91398417_91398817	7.51472	6.83447	-1.13449	-0.480978	0.409478	ENSG00000179399.14	GPC5	2.35874	2.10901	-0.260001	0.422978
chr7_25180252_25180652	6.18235	6.15176	-0.0305852	0.140584	0.854743	ENSG00000153790.11	C7orf31	0.365939	0.0658606	-0.162619	0.733913
chr5_66828603_66829003	3.52478	3.24705	-0.277727	-0.0894325	0.951977	ENSG00000069020.18	MAST4	0.311465	-2.32193	-1.85933	0.00999069
chr6_89080467_89080867	6.97072	6.69049	-0.280232	-0.0771199	0.930214	ENSG00000146278.10	PNRC1	4.25959	4.09325	-0.0564852	0.876798
chr17_54900582_54900982	7.3125	6.91056	-0.40194	-0.21174	0.779955	ENSG00000141198.15	TOM1L1	4.71021	4.42797	-0.22804	0.379855
chr4_83012853_83013253	8.18965	8.06297	-0.112768	0.0764709	0.939301	ENSG00000189308.10	LIN54	2.90657	1.82019	-0.976083	0.00495974
chr16_67935568_67935968	6.1794	6.70956	0.530152	0.738433	0.117319	ENSG00000205220.11	PSMB10	5.51746	5.47279	-0.264611	0.21316
chr3_49554373_49554773	3.90601	4.35755	0.451546	0.551588	0.437475	ENSG00000164061.4	BSN	-2.69041	-2.78673	-0.333857	0.628485
chr1_212857985_212858385	8.15819	7.85617	-0.302017	-0.0969832	0.919521	ENSG00000162769.12	FLVCR1	3.57153	5.36732	0.932376	0.00257476
chr5_159209647_159210047	7.07024	6.83972	-0.192416	-0.0429481	0.963859	ENSG00000145860.11	RNF145	4.945	5.44704	0.343355	0.0599198
chrX_10620376_10620776	6.08751	5.65129	-0.32766	-0.235164	0.732575	ENSG00000101871.14	MID1	3.66374	2.7717	-0.512109	0.0438367
chr3_194134765_194135165	7.37715	7.24833	-0.0670888	0.0431376	0.964628	ENSG00000114315.3	HES1	3.88201	3.94746	0.112498	0.660058
chr9_21335118_21335518	6.47379	6.07426	-0.39953	-0.204123	0.77416	ENSG00000198642.6	KLHL9	2.36328	2.10284	-0.257026	0.22548
chr2_215311789_215312189	8.22141	7.544	-0.677406	-0.486017	0.444324	ENSG00000138363.14	ATIC	6.97968	7.64908	0.461317	0.0163311
chr16_56729870_56730270	5.69893	5.95461	0.25568	0.47825	0.38337	ENSG00000102900.12	NUP93	6.34812	6.81375	0.355281	0.0390702
chr1_8878710_8879110	6.07788	6.51681	0.139062	0.647441	0.184332	ENSG00000074800.15	ENO1	11.2221	11.0873	-0.119675	0.423635
chr16_22436738_22437138	4.07878	4.25418	0.175393	0.360092	0.660439	ENSG00000237296.9	SMG1P1	2.1658	2.21101	-0.167142	0.782605
chr6_42746279_42746679	6.0402	6.49397	0.453765	0.633385	0.189506	ENSG00000124659.6	TBCC	4.40198	4.28128	-0.107245	0.611582
chr1_29181848_29182248	5.72819	6.15966	0.431474	0.637267	0.18999	ENSG00000116350.16	SRSF4	5.50419	5.72345	0.279089	0.118516
chr10_99620621_99621021	8.38658	8.3046	-0.0819833	0.121001	0.899863	ENSG00000155287.10	SLC25A28	5.03882	5.26944	0.317966	0.144601
chr19_34734051_34734451	6.83109	6.60627	-0.224824	-0.0164702	0.986641	ENSG00000197841.14	ZNF181	1.53616	2.05418	0.637473	0.0643662
chr19_2944861_2945261	5.39165	5.80735	0.415702	0.60696	0.228854	ENSG00000175691.8	ZNF77	1.38128	2.23876	0.892206	0.024565
chr17_41811798_41812198	4.9699	5.23368	0.263785	0.433126	0.487682	ENSG00000141696.12	P3H4	5.91933	5.66029	-0.299608	0.0939717
chr2_241355944_241356344	6.44089	6.53853	0.134207	0.281514	0.665386	ENSG00000006607.13	FARP2	4.1744	3.68098	-0.658618	0.0109142
chr4_973446_973846	4.38602	5.15396	0.76794	0.937146	0.0684596	ENSG00000145214.13	DGKQ	1.89528	1.74907	-0.274847	0.28494
chr17_81911367_81911767	5.05543	5.92505	0.869626	1.01173	0.0181345	ENSG00000185813.10	PCYT2	5.23367	5.03223	-0.207568	0.239492
chr2_176002088_176002488	6.90714	6.43402	-0.473119	-0.28178	0.670768	ENSG00000144320.13	LNPK	2.61471	3.00236	0.0148866	0.95449
chr6_291922_292322	8.20024	7.72085	-0.479392	-0.305447	0.682373	ENSG00000112679.14	DUSP22	4.22612	4.91658	0.63184	0.0132123
chr9_6566415_6566815	6.80154	6.19956	-0.644931	-0.339056	0.604454	ENSG00000178445.9	GLDC	-1.01752	-0.264536	0.669188	0.331616
chr9_77177235_77177635	8.49897	7.71032	-0.484219	-0.603962	0.315575	ENSG00000197969.12	VPS13A	1.66356	1.92457	-0.258529	0.330773
chr2_172555777_172556177	7.01835	7.04571	0.0273624	0.227658	0.756678	ENSG00000152256.13	PDK1	3.38282	3.36789	-0.0903182	0.679202
chr1_23484249_23484649	5.16692	5.54015	0.373233	0.55806	0.302781	ENSG00000088280.18	ASAP3	2.77841	1.55896	-1.43575	0.00163565
chr17_15999534_15999934	7.05561	6.81547	-0.240142	-0.0274201	0.977818	ENSG00000011295.15	TTC19	4.36345	4.69365	0.338686	0.0835625
chr7_76054061_76054461	5.05981	3.44719	-1.61262	-1.38574	0.00880656	ENSG00000146701.11	MDH2	8.14546	8.29742	0.26168	0.136493
chr1_154328470_154328870	4.88267	3.64384	0.125684	-1.07985	0.0493444	ENSG00000143515.16	ATP8B2	1.05044	-0.583251	-2.11763	0.00162629
chr5_61331926_61332326	7.53623	7.30737	-0.228868	-0.030122	0.97635	ENSG00000130449.5	ZSWIM6	2.8261	3.03841	0.225054	0.247685
chr3_45841964_45842364	5.68965	5.76992	0.0802685	0.239236	0.724788	ENSG00000163818.16	LZTFL1	3.71353	3.93283	0.131079	0.589292
chr4_99946472_99946872	6.65942	6.1875	-0.471923	-0.303956	0.630576	ENSG00000164031.16	DNAJB14	2.2754	3.4914	0.775938	0.0166576
chr8_8892917_8893317	4.68446	3.99277	-0.691688	-0.528456	0.44218	ENSG00000147324.10	MFHAS1	2.73563	2.53635	-0.226473	0.24459
chr6_43516803_43517203	5.86925	6.14881	0.27956	0.485229	0.364391	ENSG00000137207.11	YIPF3	6.46734	6.69182	0.301449	0.0831569
chr7_130913261_130913661	6.22196	6.82424	0.602278	0.828293	0.0748528	ENSG00000226380.9	LINC-PINT	-2.80764	-1.43704	1.61077	0.0880201
chr7_138459848_138460248	8.41737	8.37293	-0.0444395	0.155449	0.86834	ENSG00000122779.17	TRIM24	3.70832	3.53044	-0.158773	0.377962
chr17_18856074_18856474	5.13856	5.56342	0.597389	0.632611	0.228311	ENSG00000141127.14	PRPSAP2	4.85418	4.99908	0.294389	0.126693
chr9_75088189_75088589	8.71386	8.19589	-0.51797	-0.328521	0.674999	ENSG00000106733.20	NMRK1	3.00995	2.21442	-0.766508	0.0433101
chr12_122974766_122975166	5.76561	6.02361	0.258003	0.475096	0.383275	ENSG00000111325.16	OGFOD2	4.23377	4.38847	0.264288	0.231599
chr4_73222921_73223321	5.46858	5.02714	-0.441448	-0.26751	0.708218	ENSG00000132466.18	ANKRD17	4.31221	3.75949	-0.771566	0.0106037
chr8_145052281_145052681	4.98125	5.16694	0.185686	0.38334	0.565657	ENSG00000182307.13	C8orf33	6.77909	7.12308	0.366297	0.0336445
chr3_134485983_134486383	7.50545	7.22826	-0.277191	-0.0657873	0.944659	ENSG00000129055.12	ANAPC13	4.47179	4.78418	0.353176	0.106831
chr5_76175064_76175464	4.28924	4.28375	-0.0054935	0.127413	0.899067	ENSG00000254893.6	AC113404.3	1.00494	1.25677	0.344384	0.616861
chr5_103178167_103178567	3.39809	3.38817	-0.00991894	0.176649	0.896289	ENSG00000145725.19	PPIP5K2	2.92416	3.22462	-0.0950071	0.697195
chr11_67374088_67374488	5.41369	4.35924	-1.05446	-0.798555	0.154019	ENSG00000175505.10	CLCF1	1.35224	1.59629	0.313093	0.384882
chr15_58770964_58771364	7.12572	7.12	-0.00571364	0.18166	0.815408	ENSG00000128923.10	MINDY2	0.524118	1.13392	0.291075	0.280636
chr6_104859755_104860155	7.78976	7.35054	-0.167009	-0.257585	0.73088	ENSG00000085382.11	HACE1	0.84371	1.21541	0.239761	0.495607
chr7_74254269_74254669	5.81308	6.15672	0.343632	0.542826	0.289954	ENSG00000049541.10	RFC2	6.08871	6.7948	0.720268	0.00497517
chr10_125161035_125161435	7.14078	6.48839	-0.652393	-0.450745	0.433621	ENSG00000175029.16	CTBP2	5.50674	5.76252	0.263382	0.127021
chr14_64986937_64987337	6.52025	6.33894	-0.181301	0.0316443	0.973093	ENSG00000257365.7	FNTB	3.00371	3.09963	0.101403	0.665593
chr1_203795345_203795745	6.10703	6.36838	0.261356	0.473778	0.383139	ENSG00000058673.16	ZC3H11A	4.80844	4.68544	-0.128166	0.429805
chr14_52729857_52730257	7.34882	6.96679	-0.382027	-0.186775	0.811633	ENSG00000198252.11	STYX	2.00004	2.17974	0.198151	0.405161
chr10_68988514_68988914	5.88085	5.8917	0.0108517	0.220629	0.753885	ENSG00000198954.7	KIF1BP	4.39154	4.68287	0.273798	0.156176
chr1_70205425_70205825	8.31029	7.79617	-0.514118	-0.319006	0.668519	ENSG00000066557.5	LRRC40	4.11053	4.16528	0.0677647	0.725284
chr17_2336813_2337213	3.80561	4.70134	0.895728	1.03371	0.0614804	ENSG00000167721.10	TSR1	6.09335	6.26666	0.270186	0.113734
chr19_1383326_1383726	5.44747	5.7902	0.342735	0.544383	0.301457	ENSG00000115286.19	NDUFS7	7.61161	7.80178	0.254706	0.129838
chr16_67806483_67806883	7.26544	7.35034	0.0849035	0.293834	0.674999	ENSG00000102904.14	TSNAXIP1	-0.333288	-0.503326	-0.59402	0.34017
chr20_653229_653629	5.73293	5.12426	-0.608669	-0.397821	0.518716	ENSG00000271303.1	SRXN1	5.02346	5.7787	0.767914	0.00333795
chr9_94259076_94259476	5.88245	5.6754	-0.207053	-0.0266791	0.977566	ENSG00000175787.16	ZNF169	1.03688	1.08316	0.0897254	0.829425
chr3_170037765_170038165	6.57255	5.95583	-0.652093	-0.436303	0.429941	ENSG00000173890.16	GPR160	-1.62166	-0.837422	0.974716	0.258754
chr1_31938390_31938790	6.96922	7.24482	0.351947	0.458886	0.432159	ENSG00000184007.20	PTP4A2	8.38075	9.2832	0.579778	0.00619683
chr18_36187262_36187662	5.7191	5.13624	-0.58286	-0.386538	0.530596	ENSG00000075643.5	MOCOS	5.21113	4.75019	-0.719694	0.0033854
chr5_31532005_31532405	8.35131	7.86581	-0.485492	-0.267434	0.73648	ENSG00000082213.17	C5orf22	4.24831	4.25723	0.168927	0.375123
chr5_55534853_55535253	6.89122	6.52658	-0.364639	-0.159384	0.840224	ENSG00000067113.16	PLPP1	3.5921	3.55383	-0.0476905	0.878859
chr13_28658870_28659270	6.11309	5.16599	-0.947098	-0.716655	0.144483	ENSG00000132963.7	POMP	6.16754	6.38387	0.234068	0.177535
chr22_39241052_39241452	4.42667	3.64356	-0.78311	-0.591078	0.414787	ENSG00000100311.16	PDGFB	3.39575	2.50083	-0.759082	0.0193033
chr6_110815538_110815938	7.267	7.09787	-0.235689	0.034199	0.972068	ENSG00000155111.14	CDK19	1.74111	1.19744	-0.638391	0.0341026
chr9_136665522_136665922	4.32964	4.1719	-0.157731	-0.0618936	0.956209	ENSG00000172889.15	EGFL7	6.14437	5.75748	-0.368251	0.123421
chr16_89657626_89658026	7.00632	6.99408	-0.0122486	0.183838	0.811725	ENSG00000131165.14	CHMP1A	6.27847	6.30597	0.0303715	0.860398
chr9_104747610_104748010	7.95738	7.45777	-0.49961	-0.291727	0.69143	ENSG00000136783.9	NIPSNAP3A	2.56296	2.98306	0.43312	0.151275
chr2_178451058_178451458	8.53799	8.10437	-0.433619	-0.235141	0.781839	ENSG00000180228.12	PRKRA	3.91805	4.34979	0.415371	0.1325
chr16_1826703_1827103	5.42772	5.86613	0.81254	0.583899	0.241045	ENSG00000063854.12	HAGH	6.27986	6.45	0.276732	0.152269
chr17_76385744_76386144	4.84	5.14365	0.0316187	0.518391	0.400096	ENSG00000176170.13	SPHK1	6.03696	5.99402	-0.0317982	0.862393
chr1_23196839_23197239	4.91467	4.97471	0.198494	0.30763	0.688408	ENSG00000179546.4	HTR1D	1.11933	0.712461	-0.416931	0.239728
chr12_109773138_109773538	4.37778	4.3334	0.137895	0.163885	0.865547	ENSG00000255650.5	FAM222A-AS1	2.73837	3.42533	0.646458	0.0799405
chr4_145180455_145180855	7.87143	7.68317	-0.188252	-0.00638754	0.995096	ENSG00000164164.16	OTUD4	2.31957	2.03357	-0.372063	0.112124
chr9_127930745_127931145	5.38143	5.52904	0.147608	0.343286	0.591506	ENSG00000167103.11	PIP5KL1	0.0670447	-0.243608	-0.234936	0.716251
chr3_72996602_72997002	6.57957	6.40339	-0.176181	0.0466777	0.959689	ENSG00000163605.14	PPP4R2	3.05439	3.46757	0.61866	0.0128731
chr11_62646515_62646915	5.20152	5.46354	0.262023	0.455701	0.440613	ENSG00000089597.17	GANAB	7.51384	7.36532	-0.111329	0.469289
chr11_67317512_67317912	5.10901	5.67966	0.225406	0.809006	0.101907	ENSG00000172613.7	RAD9A	3.95461	4.03155	0.0399891	0.874755
chr19_2739905_2740305	4.62818	4.87195	0.243772	0.4579	0.498777	ENSG00000141873.10	SLC39A3	4.55053	5.47866	0.888184	0.00341893
chr20_10674066_10674466	7.12584	6.4822	-0.64364	-0.432914	0.461482	ENSG00000101384.12	JAG1	2.02655	1.71541	-0.301445	0.275893
chr19_43533289_43533689	4.27089	4.86933	0.598444	0.800678	0.160173	ENSG00000176472.10	ZNF575	-0.902452	-1.89294	-1.09111	0.197531
chr22_37608481_37608881	5.78663	6.23654	0.752298	0.660962	0.171237	ENSG00000100083.18	GGA1	5.17744	5.21738	0.20504	0.241883
chr5_74684957_74685357	6.71185	6.47875	-0.487677	-0.0600215	0.946104	ENSG00000049860.13	HEXB	6.66773	6.55266	-0.241231	0.133098
chr8_30384572_30384972	4.48427	4.09328	-0.390994	-0.187208	0.845013	ENSG00000254109.5	RBPMS-AS1	-0.370891	-0.168214	0.186562	0.830938
chr1_113904886_113905286	8.59705	8.43087	-0.166175	0.0426378	0.969183	ENSG00000118655.5	DCLRE1B	4.29714	4.63476	0.301497	0.107275
chr11_123195493_123195893	4.18058	4.72012	-0.46798	0.710019	0.236044	ENSG00000166250.11	CLMP	4.79467	4.39892	-0.314825	0.0906263
chr8_29262902_29263302	5.21021	5.59935	0.389139	0.59012	0.265768	ENSG00000197892.12	KIF13B	2.0239	1.57852	-0.359691	0.137993
chr3_51941866_51942266	7.41516	7.41669	0.00153482	0.198588	0.800915	ENSG00000114767.6	RRP9	5.55436	6.10817	0.56887	0.0140863
[truncated: 8,857 more rows]

## Sheet: B. List of represed genes
peak ID	peak log2 mean count (control)	peak log2 mean count (TXNIP Knock down)	peak mean log2 fold change	peak log2 fold change (max intensity)*	peak FDR* (max intensity)	gene ID	gene symbol	gene mean TPM (control)	gene mean TPM (TXNIP knock down)	gene log2 fold change	gene FDR*
chr19_39193746_39194146	3.81102	2.69896	-1.11207	-0.968484	0.268807	ENSG00000188505.4	NCCRP1	-0.623027	-1.41619	-1.04004	0.161283
chr11_36455772_36456172	6.39079	4.71892	-0.660321	-1.477	0.000292454	ENSG00000135362.13	PRR5L	3.88119	2.98041	-1.01356	0.0108452
chr1_175192773_175193173	7.95217	6.90103	-1.62976	-0.845647	0.0909564	ENSG00000235750.9	KIAA0040	3.24728	1.52703	-1.74227	0.000783971
chr19_35309441_35309841	6.03059	4.38595	-1.64464	-1.43139	0.00101283	ENSG00000105695.14	MAG	3.83096	1.17031	-2.20936	0.0011412
chr1_235073537_235073937	6.71943	5.35531	-1.36413	-1.14096	0.00654185	ENSG00000280587.1	LINC01348	-1.25523	-2.39793	-1.86	0.0428409
chr17_81527874_81528274	4.67747	3.58107	-1.09641	-0.883842	0.150607	ENSG00000186765.11	FSCN2	0.362936	-0.77186	-1.42702	0.0396338
chr7_38341282_38341682	5.61628	4.59398	-1.0223	-0.840887	0.0923738	ENSG00000281103.1	TRG-AS1	-0.953626	-0.823734	-1.05617	0.246161
chr3_146161006_146161406	8.44096	7.63958	-1.03555	-0.601495	0.313982	ENSG00000152952.11	PLOD2	5.80975	4.45308	-1.27518	0.001915
chr9_104831633_104832033	4.5791	3.17454	-1.40456	-1.18376	0.0517728	ENSG00000165029.15	ABCA1	-0.959058	-2.22741	-1.8868	0.00487722
chr1_116109666_116110066	6.71042	5.85473	-1.07139	-0.611976	0.232376	ENSG00000173212.4	MAB21L3	-0.473931	-1.84112	-2.16122	0.0105958
chr12_109312201_109312601	5.20334	3.32596	-1.12619	-1.69417	0.000822198	ENSG00000139445.17	FOXN4	1.02277	-0.338921	-1.43147	0.00869193
chr4_168318361_168318761	6.44541	5.69517	-1.05584	-0.570741	0.252537	ENSG00000137628.16	DDX60	1.29647	0.544749	-1.55464	0.00212137
chr6_119349576_119349976	5.78835	4.7728	-1.01555	-0.812227	0.0981029	ENSG00000111885.6	MAN1A1	1.06004	-0.409162	-1.60986	0.00273173
chr20_40689145_40689545	7.33174	6.12335	-1.20839	-1.01668	0.0204379	ENSG00000204103.3	MAFB	-2.06645	-2.71798	-1.32651	0.309526
chr22_45502596_45502996	4.58647	3.90669	-1.03218	-0.565698	0.406882	ENSG00000077942.18	FBLN1	7.26366	6.31504	-1.016	0.00158646
chrX_153732398_153732798	4.09151	2.69791	-1.3936	-1.21402	0.104772	ENSG00000101986.11	ABCD1	5.04023	4.10143	-1.07734	0.00134928
chr1_154328470_154328870	4.88267	3.64384	0.125684	-1.07985	0.0493444	ENSG00000143515.16	ATP8B2	1.05044	-0.583251	-2.11763	0.00162629
chr12_57047995_57048395	5.17952	4.25985	-1.09861	-0.665391	0.276532	ENSG00000166866.12	MYO1A	0.245696	-0.209252	-1.71868	0.0103123
chr22_32532575_32532975	5.3241	3.98535	-0.769899	-1.14149	0.0238453	ENSG00000185666.14	SYN3	-1.44877	-3.13267	-3.21654	0.0285338
chr7_152314058_152314458	4.51501	3.39625	-1.11876	-0.973864	0.11744	ENSG00000055609.17	KMT2C	2.27892	1.44448	-1.47156	0.00344104
chr11_705780_706180	4.77226	3.74438	-1.02787	-0.861114	0.145978	ENSG00000177106.15	EPS8L2	5.19203	3.82758	-1.5288	0.000739033
chr1_214551662_214552062	8.28293	7.98267	-1.09787	-0.0933737	0.924362	ENSG00000152104.11	PTPN14	4.02346	2.96954	-1.02989	0.00206541
chr16_57939068_57939468	4.89459	3.51756	-1.37704	-1.22541	0.022805	ENSG00000070729.13	CNGB1	-0.170038	-1.05639	-1.32129	0.055264
chr2_1792112_1792512	7.11833	5.88733	-0.893046	-1.0251	0.0178026	ENSG00000186487.19	MYT1L	-0.93493	-2.16096	-2.00154	0.0181662
chr2_215410859_215411259	4.79781	3.37912	-1.17392	-1.18895	0.0366919	ENSG00000115414.18	FN1	-1.07921	-2.21798	-1.44247	0.0863148
chr2_218857469_218857869	4.94451	2.98874	-1.95577	-1.71407	0.00170923	ENSG00000115596.3	WNT6	3.1787	1.48992	-1.72917	0.00370077
chr1_197442046_197442446	7.29129	5.78616	-1.44237	-1.29125	0.00202122	ENSG00000134376.15	CRB1	1.12427	-0.577928	-2.06326	0.0146356
chr16_71520576_71520976	4.90417	3.00228	-1.29805	-1.65639	0.00278915	ENSG00000140835.9	CHST4	0.0227215	-0.920056	-1.16512	0.0588004
chr1_911157_911557	3.48388	2.44078	-1.04311	-0.823052	0.483455	ENSG00000230699.2	AL645608.2	-0.424071	-1.60545	-1.51857	0.0277296
chr5_126423246_126423646	7.26751	6.37219	-1.12311	-0.687221	0.168762	ENSG00000155324.9	GRAMD2B	4.00972	2.5912	-1.29704	0.00198541
chr19_35319045_35319445	6.96536	5.29609	-1.66927	-1.46431	0.000286568	ENSG00000012124.16	CD22	4.15985	1.63919	-2.4334	0.000347695
chr2_218004026_218004426	6.30027	4.97314	-0.118865	-1.13094	0.00730601	ENSG00000079308.18	TNS1	4.8671	3.60328	-1.39191	0.00119193
chrX_43882281_43882681	3.96497	2.79989	-1.16508	-0.971479	0.235581	ENSG00000069535.13	MAOB	-1.00579	-2.35893	-2.07588	0.0245122
chr6_149895980_149896380	4.3266	3.16672	-1.15988	-0.971646	0.154019	ENSG00000164520.11	RAET1E	3.12754	1.32953	-1.7008	0.00286022
chr12_13196450_13196850	7.83853	6.68322	-1.06104	-0.934007	0.049489	ENSG00000134531.9	EMP1	4.6678	2.9663	-1.30659	0.00143891
chr8_119416417_119416817	5.95283	4.93552	-1.0173	-0.806014	0.0945439	ENSG00000136999.4	NOV	-0.545094	-2.69645	-3.27975	0.00569597
chr8_22117813_22118213	3.81178	2.69691	-1.11488	-0.886525	0.34218	ENSG00000168453.14	HR	2.72418	0.594991	-2.20014	0.000887246
chr5_52783332_52783732	5.4862	4.48422	-1.00199	-0.806168	0.122952	ENSG00000213949.8	ITGA1	4.49928	2.75551	-1.09696	0.00271027
chr7_159015415_159015815	7.34461	6.17134	-1.17328	-0.953945	0.0362716	ENSG00000231419.6	LINC00689	2.44581	0.872059	-1.6508	0.0014577
chr5_139373638_139374038	5.92019	4.36201	-1.55818	-1.42043	0.000921063	ENSG00000272742.1	AC135457.1	0.181389	-1.56645	-1.47071	0.217442
chr10_112375964_112376364	5.99775	4.98086	-1.01688	-0.807066	0.0892995	ENSG00000197142.10	ACSL5	4.27354	2.59483	-1.78489	0.00057166
chr6_144284704_144285104	7.04798	6.62909	-1.02293	-0.226307	0.754849	ENSG00000152818.18	UTRN	1.94387	0.825198	-1.76792	0.00446747
chr9_70043705_70044105	6.18273	5.28271	-1.52887	-0.697806	0.145675	ENSG00000165072.9	MAMDC2	3.94808	2.85025	-1.10829	0.0019273
chr10_122461348_122461748	5.35393	4.85998	-1.00628	-0.342523	0.610934	ENSG00000166033.12	HTRA1	4.93665	3.86318	-1.17516	0.00201925
chr8_49072060_49072460	5.02916	3.64025	-1.38891	-1.23395	0.0181023	ENSG00000168333.13	PPDPFL	2.74785	0.471604	-2.22315	0.00494227
chr2_219419731_219420131	4.04209	3.00177	-1.04031	-0.827746	0.307663	ENSG00000175084.11	DES	2.59744	1.34826	-1.33818	0.00868223
chr11_125951032_125951432	6.65278	5.10254	-1.55025	-1.37149	0.000637972	ENSG00000283703.2	VSIG10L2	2.21626	0.807802	-1.51409	0.0148285
chr2_113211279_113211679	6.47928	4.57554	-0.634513	-1.67671	5.27453e-05	ENSG00000189223.14	PAX8-AS1	0.663269	0.358386	-1.24664	0.0239408
chr2_11398746_11399146	4.98958	3.88656	-1.10302	-0.941341	0.0886196	ENSG00000224177.6	LINC00570	-0.236966	-1.87041	-1.44621	0.168023
chr2_227164013_227164413	5.15309	4.08645	-1.06664	-0.94038	0.075155	ENSG00000081052.12	COL4A4	-1.72741	-2.34019	-1.73808	0.0195351
chr17_34252432_34252832	5.68452	4.68404	-1.51517	-0.808386	0.10583	ENSG00000108691.9	CCL2	0.867761	-2.14386	-3.39381	0.00948822
chr1_32703069_32703469	6.04558	4.4673	-1.57828	-1.35479	0.00206846	ENSG00000162520.14	SYNC	2.64764	0.214554	-2.73656	0.00106082
chr16_55499996_55500396	5.96189	4.8108	-1.4672	-0.893455	0.0694723	ENSG00000087245.12	MMP2	-1.48741	-1.97393	-2.0725	0.0787611
chr14_96204582_96204982	5.67261	4.27577	-1.39684	-1.21606	0.00846432	ENSG00000168398.6	BDKRB2	-0.91414	-2.43916	-2.7806	0.00594758
chr5_14581610_14582010	7.46439	6.87928	-1.50334	-0.373741	0.560201	ENSG00000145569.5	OTULINL	3.39894	2.02974	-1.32922	0.00197895
chr3_50268886_50269286	5.55831	3.96308	-1.59524	-1.38943	0.00350843	ENSG00000012171.19	SEMA3B	6.99347	4.79324	-2.19742	0.000247443
chr8_10654619_10655019	6.31244	5.05986	-1.25257	-1.03958	0.015651	ENSG00000183638.5	RP1L1	-2.40397	-3.07921	-2.11031	0.0497543
chr6_75205898_75206298	8.25598	7.041	-1.01179	-0.983728	0.0471383	ENSG00000111799.20	COL12A1	5.05885	3.95063	-1.61894	0.000637311
chr3_4906284_4906684	5.7736	3.94934	-1.82425	-1.56078	0.00121822	ENSG00000235831.6	BHLHE40-AS1	-1.04586	-1.3594	-1.12197	0.152596
chr5_174503726_174504126	5.60003	3.81944	-1.82458	-1.54953	0.00129049	ENSG00000249306.5	LINC01411	0.0429842	-1.65236	-2.2856	0.0146379
chr1_183279821_183280221	6.07429	4.62582	-0.547637	-1.21222	0.00666623	ENSG00000157064.10	NMNAT2	-1.73697	-2.20867	-1.29491	0.107621
chr5_149062629_149063029	7.02327	5.31278	-0.67723	-1.50453	0.000200659	ENSG00000169247.12	SH3TC2	0.847997	-0.00943901	-1.191	0.0266572
chr6_71394115_71394515	5.02763	3.99522	-1.03241	-0.757183	0.218346	ENSG00000279289.1	AL136164.3	-2.41414	-2.82193	-1.16756	0.350068
chr1_161198451_161198851	5.99753	4.74902	-1.24852	-1.07147	0.0143042	ENSG00000158859.9	ADAMTS4	0.861954	-0.445821	-1.19005	0.00718686
chr4_74308255_74308655	4.046	2.99873	-1.04727	-0.824164	0.311769	ENSG00000182585.9	EPGN	2.15299	0.166712	-1.62989	0.024626
chrX_153885294_153885694	5.16714	4.21909	-1.44259	-0.736003	0.201114	ENSG00000198910.13	L1CAM	8.17574	5.87264	-2.34824	0.000899596
chr9_117703846_117704246	4.49119	3.32238	-1.16881	-0.981659	0.122584	ENSG00000136869.14	TLR4	-2.10012	-2.7499	-1.4536	0.104427
chr4_1082278_1082678	4.31922	2.70232	-0.359159	-1.41963	0.0338229	ENSG00000178222.12	RNF212	3.7908	2.28932	-1.0156	0.0133494
chr1_206513616_206514016	6.07033	4.77945	-0.766957	-1.03871	0.0254351	ENSG00000266094.7	RASSF5	3.43807	2.08856	-1.26573	0.00212137
chr14_50038373_50038773	5.3696	4.08159	-0.752554	-1.01225	0.0662153	ENSG00000214900.9	LINC01588	-0.6715	-1.85137	-1.1246	0.120497
chr2_55923598_55923998	6.53307	5.47024	-1.06283	-0.850324	0.056816	ENSG00000115380.19	EFEMP1	7.37246	5.98725	-1.41463	0.00057166
chr3_155023922_155024322	5.64323	4.17043	-0.791677	-1.24567	0.00940963	ENSG00000196549.10	MME	-0.205214	-1.41517	-1.40041	0.0301431
chr1_26771565_26771965	5.24526	3.83531	-0.0624395	-1.23434	0.0141175	ENSG00000117713.19	ARID1A	4.04969	2.74506	-1.65131	0.00118894
chr4_7381315_7381715	4.29247	3.08253	-0.756221	-1.01713	0.140454	ENSG00000184985.16	SORCS2	1.89582	0.484506	-1.26607	0.00334632
chr9_88991448_88991848	4.60375	3.46689	-1.13686	-0.953331	0.119933	ENSG00000213694.4	S1PR3	1.07878	-0.31319	-1.48418	0.010657
chr9_33442988_33443388	5.87083	4.63996	-0.620363	-1.04882	0.0209037	ENSG00000165272.15	AQP3	7.239	5.39306	-1.69667	0.00039247
chr11_130190261_130190661	6.03069	4.63812	-1.02258	-1.20815	0.00510232	ENSG00000149418.10	ST14	3.92505	2.73292	-1.17163	0.00206233
chr14_53953349_53953749	5.33542	4.12057	-1.21485	-1.03994	0.0396114	ENSG00000125378.15	BMP4	-0.78352	-2.02705	-1.96066	0.0699516
chr18_31497964_31498364	6.198	5.14587	-1.05213	-0.876626	0.0476168	ENSG00000046604.12	DSG2	4.4262	3.18662	-1.25483	0.00300197
chr1_99682440_99682840	8.25198	7.63095	-1.15962	-0.383957	0.584262	ENSG00000099260.10	PALMD	4.0748	3.09955	-1.04402	0.00390011
chr2_1744314_1744714	5.02471	4.88086	-1.00165	0.0575519	0.954861	ENSG00000130508.10	PXDN	5.46094	3.91746	-1.61917	0.00057166
chr11_74269132_74269532	5.54834	4.26503	-0.426072	-1.04702	0.0374392	ENSG00000149380.11	P4HA3	1.62527	0.691195	-1.01071	0.0286402
chr14_75427783_75428183	4.5604	3.52073	-1.03967	-0.892051	0.151303	ENSG00000140044.12	JDP2	4.23993	2.6937	-1.55038	0.00121689
chr8_40153316_40153716	4.99443	3.86299	-1.13144	-0.86393	0.147629	ENSG00000176907.4	TCIM	3.75386	2.24476	-1.51731	0.0014577
chr17_76529690_76530090	5.19549	4.34491	-1.0893	-0.67124	0.24646	ENSG00000161544.9	CYGB	0.921349	-0.316314	-1.3074	0.0382357
peak log2 fold change (max intensity)* - If multiple peaks were found to be located in promoter of gene, peak whose intensity is highest was selected
* FDR - False discovery rate from edgeR
