# Supplementary figures and images for: Comparative interactome analysis of α-arrestin families in human and Drosophila
Source: eLife journal article supplement (doi:10.7554/elife.88328), 2023-07-26

## Mycoplasma testing

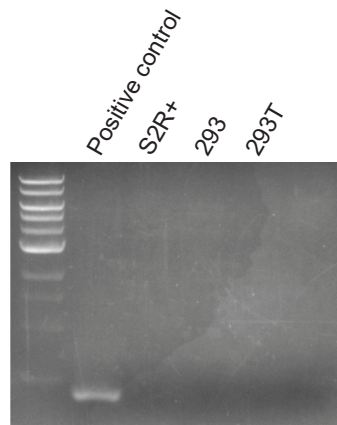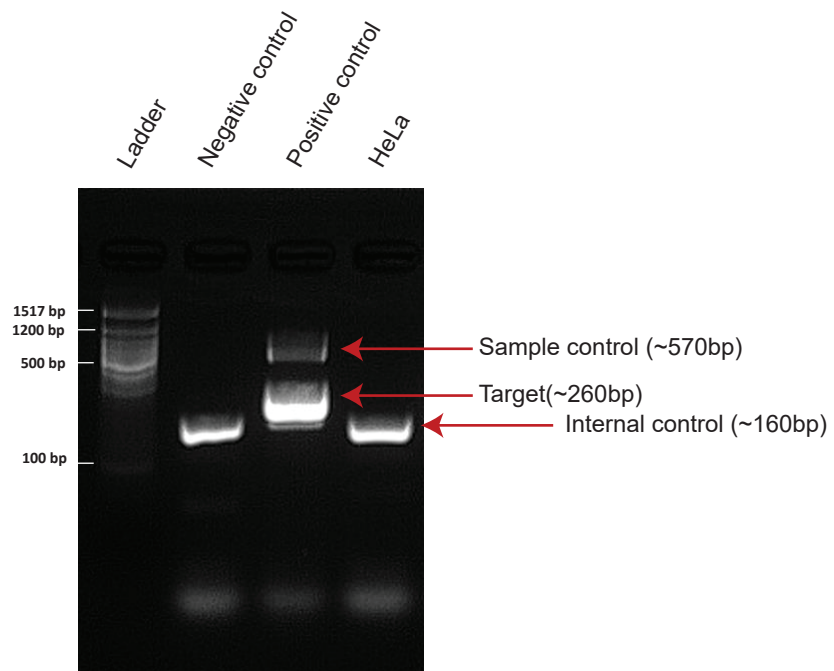

Supplement: supp12 [file elife-88328-supp12-v1.zip]
